# Supplementary material for: Clear anti-phase tendency of volcanic eruptions and consistent U.S. Dollar Index response to volcanic forcing
Source: Research Square preprint supplement (doi:10.21203/rs.3.rs-602091/v1), 2021-07-12
Supplement: Supplementary file 1 [file Extended Data(calculation of Table 2).xlsx]

## Sheet: Eruption List
Global Volcanism Program - Volcanoes of the World 4.9.4				Downloaded on 13 May 2021 at 06:57 PM																											같은해 1년	같은해 0년
Volcano Number	Volcano Name	Eruption Number	Eruption Category	Area of Activity	VEI	VEI Modifier	Start Year Modifier	Start Year	Start Year Uncertainty	Start Month	Start Day Modifier	Start Day	Start Day Uncertainty	Evidence Method (dating)	End Year Modifier	End Year	End Year Uncertainty	End Month	End Day Modifier	End Day	End Day Uncertainty	Latitude	Longitude		1967~2019	start year	end year	Duration	sort(srt y)	sort(end y)	sort(dur)	end-start year>0
312070	Veniaminof	22393	Confirmed Eruption					2021		2		28		Historical Observations	>	2021		3		12		56.17	-159.38
311060	Semisopochnoi	22392	Confirmed Eruption					2021		2		2	2	Historical Observations		2021		2		7		51.93	179.58
263340	Raung	22383	Confirmed Eruption					2021		1		21		Historical Observations	>	2021		3		12		-8.119	114.056
290240	Sarychev Peak	22384	Confirmed Eruption					2021		1		7		Historical Observations		2021		2		19		48.092	153.2
263250	Merapi	22381	Confirmed Eruption					2020		12		31		Historical Observations	>	2021		3		12		-7.54	110.446		2020	2020	2021	2
344020	San Cristobal	22394	Confirmed Eruption					2020		12	?	27		Historical Observations		2021		3		9		12.702	-87.004			2020	2021	2
360150	Soufriere St. Vincent	22385	Confirmed Eruption					2020		12		27		Historical Observations	>	2021		3		12		13.33	-61.18			2020	2021	2
263310	Tengger Caldera	22382	Confirmed Eruption					2020		12		26		Historical Observations		2020		12		28		-7.942	112.95			2020	2020	1
332010	Kilauea	22380	Confirmed Eruption		0			2020		12		20		Historical Observations	>	2021		3		12		19.421	-155.287			2020	2021	2
233020	Fournaise, Piton de la	22371	Confirmed Eruption					2020		12		7		Historical Observations		2020		12		8		-21.244	55.708			2020	2020	1
264230	Lewotolok	22373	Confirmed Eruption					2020		11		27		Historical Observations	>	2021		3		12		-8.274	123.508			2020	2021	2
282060	Kikai	22374	Confirmed Eruption					2020		10		6		Historical Observations		2020		10		6		30.793	130.305			2020	2020	1
255060	Kavachi	22364	Confirmed Eruption					2020		9		2		Historical Observations	>	2021		3		11		-8.991	157.979			2020	2021	2
282050	Kuchinoerabujima	22391	Confirmed Eruption		1			2020		8		29		Historical Observations		2020		8		29		30.443	130.217			2020	2020	1
261080	Sinabung	22365	Confirmed Eruption					2020		8		8		Historical Observations	>	2021		3		12		3.17	98.392			2020	2021	2
344040	Telica	22368	Confirmed Eruption					2020		7		20		Historical Observations		2020		12		9		12.606	-86.84			2020	2020	1
263340	Raung	22367	Confirmed Eruption					2020		7		16		Historical Observations		2020		10		3		-8.119	114.056			2020	2020	1
345070	Turrialba	22369	Confirmed Eruption					2020		6		18		Historical Observations		2020		8		24		10.025	-83.767			2020	2020	1
357090	Copahue	22376	Confirmed Eruption	Agrio Crater				2020		6		16		Historical Observations		2020		10		19	2	-37.856	-71.183			2020	2020	1
311240	Cleveland	22361	Confirmed Eruption					2020		6		1		Historical Observations		2020		6		1		52.825	-169.944			2020	2020	1
282060	Kikai	22359	Confirmed Eruption					2020		4		29		Historical Observations		2020		4		29		30.793	130.305			2020	2020	1
300130	Karymsky	22360	Confirmed Eruption					2020		4		1		Historical Observations		2021		2		5		54.049	159.443			2020	2021	2
266030	Soputan	22354	Confirmed Eruption					2020		3		23		Historical Observations		2020		4		2		1.112	124.737			2020	2020	1
255060	Kavachi	22357	Confirmed Eruption					2020		3		16		Historical Observations		2020		4		30		-8.991	157.979			2020	2020	1
343100	San Miguel	22355	Confirmed Eruption					2020		2		22		Historical Observations		2020		2		22		13.434	-88.269			2020	2020	1
233020	Fournaise, Piton de la	22343	Confirmed Eruption		0			2020		2		10		Historical Observations		2020		4		6		-21.244	55.708			2020	2020	1
345020	Rincon de la Vieja	22346	Confirmed Eruption					2020		1		30		Historical Observations		2020		11		3		10.83	-85.324			2020	2020	1
353010	Fernandina	22347	Confirmed Eruption		0			2020		1		12		Historical Observations		2020		1		13		-0.37	-91.55			2020	2020	1
273070	Taal	22344	Confirmed Eruption					2020		1		12		Historical Observations		2020		1		22		14.002	120.993			2020	2020	1
282050	Kuchinoerabujima	22345	Confirmed Eruption					2020		1		11		Historical Observations		2020		5		13		30.443	130.217			2020	2020	1
241040	Whakaari/White Island	22338	Confirmed Eruption	1978/90 Crater Complex	2			2019		12		9		Historical Observations		2019		12		9		-37.52	177.18			2019	2019	1
311060	Semisopochnoi	22341	Confirmed Eruption		1			2019		12		7		Historical Observations		2020		3	?	15		51.93	179.58			2019	2020	2
284096	Nishinoshima	22340	Confirmed Eruption		1			2019		12		5		Historical Observations		2020		10		15	3	27.247	140.874			2019	2020	2
311240	Cleveland	22342	Uncertain Eruption					2019		11		7		Historical Observations		2019		12	?	7		52.825	-169.944			2019	2019	1
282060	Kikai	22339	Confirmed Eruption		2			2019		11		2		Historical Observations		2019		11		2		30.793	130.305			2019	2019	1
243070	Lateiki	22334	Confirmed Eruption		1			2019		10		13		Historical Observations		2019		10		22		-19.18	-174.87			2019	2019	1
283110	Asamayama	22326	Confirmed Eruption		2			2019		8		7		Historical Observations		2019		8		25		36.406	138.523			2019	2019	1
357090	Copahue	22336	Confirmed Eruption	Agrio Crater	2			2019		8		2		Historical Observations		2019		11	?	12		-37.856	-71.183			2019	2019	1
263090	Tangkuban Parahu	22325	Confirmed Eruption		1			2019		7		26		Historical Observations		2019		9		17		-6.77	107.6			2019	2019	1
311360	Shishaldin	22330	Confirmed Eruption	Summit crater	3			2019		7		23		Historical Observations		2020		5		4		54.756	-163.97			2019	2020	2
311060	Semisopochnoi	22328	Confirmed Eruption		1			2019		7		16		Historical Observations		2019		8		24		51.93	179.58			2019	2019	1
252120	Ulawun	22319	Confirmed Eruption		4			2019		6		26		Historical Observations		2019		10		5		-5.05	151.33			2019	2019	1
354020	Ubinas	22324	Confirmed Eruption		2			2019		6		24		Historical Observations		2019		9		12		-16.355	-70.903			2019	2019	1
290250	Raikoke	22321	Confirmed Eruption		3			2019		6		22		Historical Observations		2019		7		1		48.292	153.25			2019	2019	1
233020	Fournaise, Piton de la	22318	Confirmed Eruption		0			2019		6		11		Historical Observations		2019		10		27		-21.244	55.708			2019	2019	1
311120	Great Sitkin	22322	Confirmed Eruption		1			2019		6		1		Historical Observations		2019		6		7		52.076	-176.13			2019	2019	1
290240	Sarychev Peak	22320	Confirmed Eruption		2			2019		5		16		Historical Observations		2019		10		7		48.092	153.2			2019	2019	1
341040	Colima	22323	Confirmed Eruption		1			2019		5		11		Historical Observations		2019		7		12		19.514	-103.62			2019	2019	1
282110	Asosan	22317	Confirmed Eruption		2			2019		4		16		Historical Observations		2020		6		16		32.884	131.104			2019	2020	2
300260	Klyuchevskoy	22310	Confirmed Eruption		2			2019		4		9		Historical Observations	>	2021		3		12		56.056	160.642			2019	2021	3
352090	Sangay	22312	Confirmed Eruption		2			2019		3		26		Historical Observations	>	2021		3		12		-2.005	-78.341			2019	2021	3
344020	San Cristobal	22311	Confirmed Eruption		1			2019		3		4		Historical Observations		2019		3		4		12.702	-87.004			2019	2019	1
233020	Fournaise, Piton de la	22307	Confirmed Eruption		0			2019		2		18		Historical Observations		2019		3		10		-21.244	55.708			2019	2019	1
263310	Tengger Caldera	22306	Confirmed Eruption	Bromo	2			2019		2		18		Historical Observations		2019		7		28		-7.942	112.95			2019	2019	1
300130	Karymsky	22309	Confirmed Eruption		2			2019		2		16		Historical Observations		2019		9		24		54.049	159.443			2019	2019	1
345040	Poas	22303	Confirmed Eruption		2			2019		2		7		Historical Observations		2019		9		30		10.2	-84.233			2019	2019	1
261080	Sinabung	22316	Confirmed Eruption		4		?	2019		2		6		Historical Observations		2019		6		9		3.17	98.392			2019	2019	1
256010	Tinakula	22313	Confirmed Eruption		2		<	2018		12		8		Historical Observations	>	2021		3		12		-10.386	165.804			2018	2021	4
267020	Karangetang	22294	Confirmed Eruption		2			2018		11		25		Historical Observations	>	2021		3		12		2.781	125.407			2018	2021	4
357040	Planchon-Peteroa	22297	Confirmed Eruption		1			2018		11		7		Historical Observations		2019		5		7	1	-35.223	-70.568			2018	2019	2
282050	Kuchinoerabujima	22296	Confirmed Eruption		3			2018		10		21		Historical Observations		2019		2		3		30.443	130.217			2018	2019	2
268060	Gamalama	22295	Confirmed Eruption		1			2018		10		4		Historical Observations		2018		10		6		0.8	127.33			2018	2018	1
266030	Soputan	22293	Confirmed Eruption		3			2018		10		2		Historical Observations		2018		12		16		1.112	124.737			2018	2018	1
260010	Barren Island	22292	Confirmed Eruption		1			2018		9		25		Historical Observations	>	2021		3		6		12.278	93.858			2018	2021	4
252120	Ulawun	22286	Confirmed Eruption		2			2018		9		21		Historical Observations		2018		10		12		-5.05	151.33			2018	2018	1
290200	Ketoi	22287	Uncertain Eruption		1			2018		9		21		Historical Observations		2018		9		21		47.35	152.475			2018	2018	1
290240	Sarychev Peak	22288	Confirmed Eruption		2			2018		9		8		Historical Observations		2018		10		15		48.092	153.2			2018	2018	1
311060	Semisopochnoi	22289	Confirmed Eruption		1			2018		9		8		Historical Observations		2018		10		31		51.93	179.58			2018	2018	1
312070	Veniaminof	22290	Confirmed Eruption		1			2018		9		4		Historical Observations		2018		12		23		56.17	-159.38			2018	2018	1
290390	Alaid	22281	Confirmed Eruption		1			2018		8		20		Historical Observations		2018		8		21		50.861	155.565			2018	2018	1
352090	Sangay	22283	Confirmed Eruption		2			2018		8		8		Historical Observations		2018		12		7		-2.005	-78.341			2018	2018	1
345020	Rincon de la Vieja	22282	Confirmed Eruption		1			2018		7		28		Historical Observations		2019		6		11		10.83	-85.324			2018	2019	2
284096	Nishinoshima	22280	Confirmed Eruption		1			2018		7		12		Historical Observations		2018		7		21		27.247	140.874			2018	2018	1
233005	Mayotte	22337	Confirmed Eruption	About 50 km E of the eastern tip of Mayotte Island	0			2018		7		3		Seismicity	?	2019		8		20		-12.83	45.17			2018	2019	2
353050	Negra, Sierra	22279	Confirmed Eruption	Summit crater and NNW flank	2			2018		6		26		Historical Observations		2018		8		23		-0.83	-91.17			2018	2018	1
344040	Telica	22277	Confirmed Eruption		1			2018		6		21		Historical Observations		2018		8		15		12.606	-86.84			2018	2018	1
262000	Krakatau	22275	Confirmed Eruption		3			2018		6		18		Historical Observations		2020		4		17		-6.102	105.423			2018	2020	3
353010	Fernandina	22278	Confirmed Eruption		1			2018		6		16		Historical Observations		2018		6		21		-0.37	-91.55			2018	2018	1
311120	Great Sitkin	22276	Confirmed Eruption		1			2018		6		10		Historical Observations		2018		8		11		52.076	-176.13			2018	2018	1
252120	Ulawun	22285	Confirmed Eruption		1			2018		6		8		Historical Observations		2018		6		8		-5.05	151.33			2018	2018	1
263250	Merapi	22264	Confirmed Eruption		3			2018		5		11		Historical Observations		2020		6		21		-7.54	110.446			2018	2020	3
300130	Karymsky	22265	Confirmed Eruption		3			2018		4		28		Historical Observations		2018		9		30		54.049	159.443			2018	2018	1
261140	Marapi	22262	Confirmed Eruption	Verbeek Crater	2			2018		4		27		Historical Observations		2018		5		2		-0.38	100.474			2018	2018	1
344020	San Cristobal	22266	Confirmed Eruption		1			2018		4		22		Historical Observations		2018		4		22		12.702	-87.004			2018	2018	1
261170	Kerinci	22274	Confirmed Eruption		1			2018		4		21		Historical Observations		2020		10		17		-1.697	101.264			2018	2020	3
223020	Nyamulagira	22315	Confirmed Eruption	Summit caldera	0			2018		4		18		Historical Observations	>	2021		3		12		-1.408	29.2			2018	2021	4
233020	Fournaise, Piton de la	22261	Confirmed Eruption		0			2018		4		3		Historical Observations		2018		11		1		-21.244	55.708			2018	2018	1
263200	Dieng Volcanic Complex	22263	Confirmed Eruption	Sileri Crater	1			2018		4		1		Historical Observations		2018		4		1		-7.2	109.879			2018	2018	1
282090	Kirishimayama	22257	Confirmed Eruption	Shinmoedake	3			2018		3		1		Historical Observations		2018		6		27		31.934	130.862			2018	2018	1
352090	Sangay	22259	Confirmed Eruption	Summit crater	1			2018		2		25		Historical Observations		2018		2		25		-2.005	-78.341			2018	2018	1
267020	Karangetang	22256	Confirmed Eruption		1			2018		2		2		Historical Observations		2018		2		2		2.781	125.407			2018	2018	1
283120	Kusatsu-Shiranesan	22258	Confirmed Eruption	Motoshiranesan	1			2018		1		23		Historical Observations		2018		1		23		36.618	138.528			2018	2018	1
343100	San Miguel	22251	Confirmed Eruption		1			2018		1		14		Historical Observations		2018		5		30		13.434	-88.269			2018	2018	1
273030	Mayon	22250	Confirmed Eruption		2			2018		1		13		Historical Observations		2019		10		12		13.257	123.685			2018	2019	2
251002	Kadovar	22246	Confirmed Eruption		2			2018		1		5		Historical Observations	>	2021		3		10		-3.608	144.588			2018	2021	4
272020	Kanlaon	22249	Confirmed Eruption		2			2017		12		9		Historical Observations		2017		12		9		10.412	123.132			2017	2017	1
264020	Agung	22241	Confirmed Eruption	Summit crater	3			2017		11		21		Historical Observations		2019		6		13		-8.343	115.508			2017	2019	3
261230	Dempo	22248	Confirmed Eruption		1			2017		11		9		Historical Observations		2017		11		9		-4.016	103.121			2017	2017	1
256010	Tinakula	22239	Confirmed Eruption		3			2017		10		21		Historical Observations		2017		10		26		-10.386	165.804			2017	2017	1
290240	Sarychev Peak	22308	Confirmed Eruption		2			2017		10		12		Historical Observations		2017		11	?	13		48.092	153.2			2017	2017	1
282090	Kirishimayama	22242	Confirmed Eruption	Shinmoedake	2			2017		10		11		Historical Observations		2017		10		17		31.934	130.862			2017	2017	1
257030	Ambae	22240	Confirmed Eruption		3			2017		9	?	6		Historical Observations		2018		10		30		-15.389	167.835			2017	2018	2
353010	Fernandina	22245	Confirmed Eruption	SSW caldera rim	2			2017		9		4		Historical Observations		2017		9		7	1	-0.37	-91.55			2017	2017	1
344020	San Cristobal	22252	Confirmed Eruption		3			2017		8		18		Historical Observations		2017		11		11		12.702	-87.004			2017	2017	1
261170	Kerinci	22273	Confirmed Eruption		1			2017		8		13		Historical Observations		2017		8		13		-1.697	101.264			2017	2017	1
352090	Sangay	22231	Confirmed Eruption	Summit crater	2			2017		7		20		Historical Observations		2017		10		26		-2.005	-78.341			2017	2017	1
264050	Sangeang Api	22228	Confirmed Eruption	Summit crater	2			2017		7		15		Historical Observations		2020		6		10		-8.2	119.07			2017	2020	4
233020	Fournaise, Piton de la	22224	Confirmed Eruption		0			2017		7		14		Historical Observations		2017		8		28		-21.244	55.708			2017	2017	1
252120	Ulawun	22225	Confirmed Eruption		1			2017		6		11		Historical Observations		2017		11		3		-5.05	151.33			2017	2017	1
273010	Bulusan	22229	Confirmed Eruption		1			2017		6		5		Historical Observations		2017		6		5		12.769	124.056			2017	2017	1
261140	Marapi	22226	Confirmed Eruption	Verbeek Crater	1			2017		6		4		Historical Observations		2017		6		4		-0.38	100.474			2017	2017	1
300130	Karymsky	22230	Confirmed Eruption		3			2017		6		4		Historical Observations		2018		1		27		54.049	159.443			2017	2018	2
357090	Copahue	22232	Confirmed Eruption	Agrio Crater	1			2017		6		4		Historical Observations		2018		12		7		-37.856	-71.183			2017	2018	2
345020	Rincon de la Vieja	22208	Confirmed Eruption	Crater lake	2			2017		5		23		Historical Observations		2018		3		15	3	10.83	-85.324			2017	2018	2
267020	Karangetang	22212	Uncertain Eruption					2017		5		10		Historical Observations		2017		5		10		2.781	125.407			2017	2017	1
263200	Dieng Volcanic Complex	22227	Confirmed Eruption	Sileri Crater	1			2017		4		30		Historical Observations		2017		7		2		-7.2	109.879			2017	2017	1
284096	Nishinoshima	22207	Confirmed Eruption		2			2017		4		18	1	Historical Observations		2017		8		17	6	27.247	140.874			2017	2017	1
345040	Poas	22209	Confirmed Eruption		1			2017		4		12		Historical Observations		2017		11		6		10.2	-84.233			2017	2017	1
222120	Lengai, Ol Doinyo	22284	Confirmed Eruption	North Crater	0			2017		4		9		Historical Observations	>	2021		3		12		-2.764	35.914			2017	2021	5
360160	Kick 'em Jenny	22260	Confirmed Eruption		0			2017		3		29		Hydrophonic		2017		3		29		12.3	-61.64			2017	2017	1
282080	Aira	22203	Confirmed Eruption	Minamidake summit crater	1			2017		3		25		Historical Observations	>	2021		3		12		31.593	130.657			2017	2021	5
300010	Kambalny	22198	Confirmed Eruption		3			2017		3		24		Historical Observations		2017		4		10		51.306	156.875			2017	2017	1
264100	Ebulobo	22211	Uncertain Eruption					2017		3		12		Historical Observations		2017		3		12		-8.817	121.191			2017	2017	1
262000	Krakatau	22188	Confirmed Eruption	Summit crater	1			2017		2		19		Historical Observations		2017		2		19		-6.102	105.423			2017	2017	1
344020	San Cristobal	22269	Confirmed Eruption		1			2017		2		18		Historical Observations		2017		4		19		12.702	-87.004			2017	2017	1
233020	Fournaise, Piton de la	22184	Confirmed Eruption		0			2017		1		31		Historical Observations		2017		2		27		-21.244	55.708			2017	2017	1
243030	Unnamed	22185	Confirmed Eruption		0			2017		1		23		Historical Observations		2017		1		31		-20.852	-175.55			2017	2017	1
260010	Barren Island	22187	Confirmed Eruption		2			2017		1		15		Historical Observations		2017		5	?	16		12.278	93.858			2017	2017	1
343100	San Miguel	22192	Confirmed Eruption		1			2017		1		7		Historical Observations		2017		1		7		13.434	-88.269			2017	2017	1
311300	Bogoslof	22182	Confirmed Eruption		3			2016		12		20		Historical Observations		2017		8		30		53.93	-168.03			2016	2017	2
290260	Chirinkotan	22175	Confirmed Eruption		3			2016		11		29		Historical Observations		2017		4		7		48.98	153.48			2016	2017	2
223020	Nyamulagira	22202	Confirmed Eruption		0			2016		11		27		Historical Observations		2017		5		2		-1.408	29.2			2016	2017	2
300120	Zhupanovsky	22177	Confirmed Eruption		2			2016		11		20		Historical Observations		2016		11		20		53.589	159.15			2016	2016	1
261170	Kerinci	22172	Confirmed Eruption		1			2016		11		15		Historical Observations		2016		11		21		-1.697	101.264			2016	2016	1
354006	Sabancaya	22158	Confirmed Eruption		3			2016		11		6		Historical Observations	>	2021		3		12		-15.787	-71.857			2016	2021	6
290380	Ebeko	22176	Confirmed Eruption		2			2016		10		20		Historical Observations	>	2021		3		12		50.686	156.014			2016	2021	6
252120	Ulawun	22171	Confirmed Eruption		1			2016		10		11		Historical Observations		2016		11		18		-5.05	151.33			2016	2016	1
282110	Asosan	22174	Confirmed Eruption		3			2016		10		7		Historical Observations		2016		11		12		32.884	131.104			2016	2016	1
300130	Karymsky	22178	Confirmed Eruption		2			2016		10		5		Historical Observations		2016		10		8		54.049	159.443			2016	2016	1
222120	Lengai, Ol Doinyo	22305	Confirmed Eruption	North Crater				2016		9	<	21		Historical Observations		2016		10	>	13		-2.764	35.914			2016	2016	1
241040	Whakaari/White Island	22147	Confirmed Eruption	2012 lava dome	1			2016		9		13		Historical Observations		2016		9		13		-37.52	177.18			2016	2016	1
354020	Ubinas	22181	Confirmed Eruption		2			2016		9		13		Historical Observations		2017		3		2		-16.355	-70.903			2016	2017	2
233020	Fournaise, Piton de la	22145	Confirmed Eruption		0			2016		9		11		Historical Observations		2016		9		18		-21.244	55.708			2016	2016	1
268060	Gamalama	22150	Confirmed Eruption		1			2016		8		3		Historical Observations		2016		8		4		0.8	127.33			2016	2016	1
264030	Rinjani	22149	Confirmed Eruption	Barujari Crater	2			2016		8		1		Historical Observations		2016		9		27		-8.42	116.47			2016	2016	1
290360	Chikurachki	22153	Confirmed Eruption		2			2016		7		27		Historical Observations		2016		8		18		50.324	155.461			2016	2016	1
343100	San Miguel	22154	Confirmed Eruption		1			2016		6		18		Historical Observations		2016		6		18		13.434	-88.269			2016	2016	1
273010	Bulusan	22151	Confirmed Eruption	SE vent	2			2016		6		10		Historical Observations		2017		3		2		12.769	124.056			2016	2017	2
345040	Poas	22156	Confirmed Eruption		1			2016		6		5		Historical Observations		2016		8		16		10.2	-84.233			2016	2016	1
233020	Fournaise, Piton de la	22144	Confirmed Eruption	Château Fort crater	0			2016		5		26		Historical Observations		2016		5		27		-21.244	55.708			2016	2016	1
241040	Whakaari/White Island	22121	Confirmed Eruption		1			2016		4		27		Historical Observations		2016		4		27		-37.52	177.18			2016	2016	1
390080	Bristol Island	22133	Confirmed Eruption		1			2016		4		24		Historical Observations		2016		7		19		-59.017	-26.533			2016	2016	1
344020	San Cristobal	22130	Confirmed Eruption		2			2016		4		22		Historical Observations		2016		4		22		12.702	-87.004			2016	2016	1
311240	Cleveland	22128	Confirmed Eruption	Summit crater	2			2016		4		16		Historical Observations		2019		1		16		52.825	-169.944			2016	2019	4
261170	Kerinci	22125	Confirmed Eruption		2			2016		3		31		Historical Observations		2016		6		9		-1.697	101.264			2016	2016	1
390130	Zavodovski	22159	Confirmed Eruption		1			2016		3		30		Historical Observations		2016		5		16	15	-56.3	-27.57			2016	2016	1
290360	Chikurachki	22127	Confirmed Eruption		2			2016		3		29		Historical Observations		2016		3		31		50.324	155.461			2016	2016	1
312030	Pavlof	22129	Confirmed Eruption		2			2016		3		27		Historical Observations		2016		7		30		55.417	-161.894			2016	2016	1
352090	Sangay	22237	Confirmed Eruption	Summit crater	2			2016		3		25		Historical Observations		2016		11		17		-2.005	-78.341			2016	2016	1
273010	Bulusan	22114	Confirmed Eruption		2			2016		2		22		Historical Observations		2016		2		22		12.769	124.056			2016	2016	1
343100	San Miguel	22117	Confirmed Eruption		1			2016		1		12		Historical Observations		2016		1		18		13.434	-88.269			2016	2016	1
357070	Chillan, Nevados de	22119	Confirmed Eruption	Nicanor crater	2			2016		1		8		Historical Observations	>	2021		3		12		-36.868	-71.378			2016	2021	6
266030	Soputan	22105	Confirmed Eruption		3			2016		1		2		Historical Observations		2016		2		7		1.112	124.737			2016	2016	1
344090	Momotombo	22107	Confirmed Eruption		2			2015		12		1		Historical Observations		2016		4		7		12.423	-86.539			2015	2016	2
272020	Kanlaon	22106	Confirmed Eruption		2			2015		11		24		Historical Observations		2016		6		18		10.412	123.132			2015	2016	2
261140	Marapi	22111	Confirmed Eruption		1			2015		11		14		Historical Observations		2015		11		14		-0.38	100.474			2015	2015	1
263310	Tengger Caldera	22103	Confirmed Eruption	Bromo cone	2			2015		11		12		Historical Observations		2016		11		12		-7.942	112.95			2015	2016	2
355100	Lascar	22110	Confirmed Eruption		2			2015		10		30		Historical Observations		2017		4		2	1	-23.37	-67.73			2015	2017	3
264030	Rinjani	22104	Confirmed Eruption	Barujari crater	2			2015		10		25		Historical Observations		2015		12		24		-8.42	116.47			2015	2015	1
252010	Langila	22123	Confirmed Eruption		2			2015		10	?	22		Historical Observations	>	2021		3		9		-5.525	148.42			2015	2021	7
344100	Masaya	22108	Confirmed Eruption		1			2015		10		3		Historical Observations	>	2021		3		12		11.985	-86.165			2015	2021	7
243060	Tofua	22370	Confirmed Eruption		0			2015		10		2		Historical Observations	>	2021		3		12		-19.75	-175.07			2015	2021	7
290390	Alaid	21096	Confirmed Eruption		1			2015		9		29		Historical Observations		2016		8		11		50.861	155.565			2015	2016	2
344040	Telica	21097	Confirmed Eruption		2			2015		9		23		Historical Observations		2016		5		11		12.606	-86.84			2015	2016	2
357090	Copahue	21098	Confirmed Eruption	Agrio Crater	2			2015		9		18	3	Historical Observations		2016		12		30		-37.856	-71.183			2015	2016	2
266100	Lokon-Empung	21093	Confirmed Eruption	Tompaluan	1			2015		8		30		Historical Observations		2015		9		28	1	1.358	124.792			2015	2015	1
300260	Klyuchevskoy	21095	Confirmed Eruption		3			2015		8		28		Historical Observations		2018		6		15		56.056	160.642			2015	2018	4
352050	Cotopaxi	21088	Confirmed Eruption		2			2015		8		14		Historical Observations		2016		1		24		-0.677	-78.436			2015	2016	2
343100	San Miguel	22233	Confirmed Eruption		1			2015		8		13		Historical Observations		2015		8		13		13.434	-88.269			2015	2015	1
360160	Kick 'em Jenny	21090	Confirmed Eruption		0			2015		7		23		Historical Observations		2015		7		24		12.3	-61.64			2015	2015	1
268060	Gamalama	21087	Confirmed Eruption		2			2015		7		16		Historical Observations		2015		9		8		0.8	127.33			2015	2015	1
264270	Sirung	21086	Confirmed Eruption		1			2015		7		7		Historical Observations		2015		7		8		-8.508	124.13			2015	2015	1
283020	Hakoneyama	21080	Confirmed Eruption		1			2015		6		29		Historical Observations		2015		7		1		35.233	139.021			2015	2015	1
354006	Sabancaya	21089	Confirmed Eruption		1			2015		6		28	10	Historical Observations		2015		7		9		-15.787	-71.857			2015	2015	1
263170	Cereme	21079	Uncertain Eruption					2015		6		24		Historical Observations		2015		6		24		-6.895	108.408			2015	2015	1
222120	Lengai, Ol Doinyo	22304	Confirmed Eruption	North Crater	0			2015		6	<	20		Historical Observations		2015		8	>	24		-2.764	35.914			2015	2015	1
283110	Asamayama	21081	Confirmed Eruption		1			2015		6		16		Historical Observations		2015		6		16		36.406	138.523			2015	2015	1
345020	Rincon de la Vieja	22132	Confirmed Eruption	Crater lake	1			2015		6		16		Historical Observations		2016		5		1		10.83	-85.324			2015	2016	2
342110	Pacaya	22157	Confirmed Eruption	MacKenney Crater	1			2015		6		7	1	Historical Observations	>	2021		3		12		14.382	-90.601			2015	2021	7
282050	Kuchinoerabujima	21073	Confirmed Eruption		3			2015		5		29		Historical Observations		2015		6		19		30.443	130.217			2015	2015	1
353020	Wolf	21075	Confirmed Eruption		4			2015		5		25		Historical Observations		2015		6		2		0.02	-91.35			2015	2015	1
266100	Lokon-Empung	21071	Confirmed Eruption	Tompaluan	1			2015		5		20		Historical Observations		2015		5		27		1.358	124.792			2015	2015	1
344040	Telica	21074	Confirmed Eruption		2			2015		5		7		Historical Observations		2015		5		28		12.606	-86.84			2015	2015	1
273010	Bulusan	21072	Confirmed Eruption		2			2015		5		1		Historical Observations		2015		7		17		12.769	124.056			2015	2015	1
331021	Axial Seamount	21092	Confirmed Eruption	NE flank	0			2015		4		23		Seismicity		2015		5		24	1	45.95	-130			2015	2015	1
358020	Calbuco	21076	Confirmed Eruption		4			2015		4		22		Historical Observations		2015		5		26		-41.33	-72.618			2015	2015	1
345070	Turrialba	20998	Confirmed Eruption		2			2015		3		8		Historical Observations		2019		12		7		10.025	-83.767			2015	2019	5
344020	San Cristobal	22268	Confirmed Eruption		2			2015		3		5		Historical Observations		2015		6		12		12.702	-87.004			2015	2015	1
290360	Chikurachki	20990	Confirmed Eruption		3			2015		2		16		Historical Observations		2015		2		18		50.324	155.461			2015	2015	1
233020	Fournaise, Piton de la	20982	Confirmed Eruption		0			2015		2		4		Historical Observations		2015		10		31		-21.244	55.708			2015	2015	1
343100	San Miguel	20994	Confirmed Eruption		1			2015		1		26		Historical Observations		2015		4		11		13.434	-88.269			2015	2015	1
352090	Sangay	22236	Confirmed Eruption	Summit crater	2			2015		1		19		Historical Observations		2015		4		7		-2.005	-78.341			2015	2015	1
266030	Soputan	20988	Confirmed Eruption		3			2015		1		6		Historical Observations		2015		3		7		1.112	124.737			2015	2015	1
300260	Klyuchevskoy	20992	Confirmed Eruption		2			2015		1		1		Historical Observations		2015		5		10		56.056	160.642			2015	2015	1
243040	Hunga Tonga-Hunga Ha'apai	20983	Confirmed Eruption		2			2014		12		19		Historical Observations		2015		1		23	3	-20.536	-175.382			2014	2015	2
268060	Gamalama	20989	Confirmed Eruption		2			2014		12		18		Historical Observations		2014		12		25		0.8	127.33			2014	2014	1
290290	Sinarka	20980	Uncertain Eruption		1			2014		12		3		Historical Observations		2014		12		3		48.873	154.182			2014	2014	1
357120	Villarrica	20996	Confirmed Eruption		1			2014		12		2	7	Historical Observations	>	2021		3		12		-39.42	-71.93			2014	2021	8
257050	Lopevi	20986	Uncertain Eruption					2014		12		1		Historical Observations		2014		12		15		-16.507	168.346			2014	2014	1
263340	Raung	21070	Confirmed Eruption		3			2014		11		23	5	Historical Observations		2015		8		30	8	-8.119	114.056			2014	2015	2
384010	Fogo	20977	Confirmed Eruption	WSW base of Pico	3			2014		11		23		Historical Observations		2015		2		8		14.95	-24.35			2014	2015	2
290260	Chirinkotan	22223	Confirmed Eruption		2			2014		11		21		Historical Observations		2015		8		10		48.98	153.48			2014	2015	2
351020	Ruiz, Nevado del	20995	Confirmed Eruption		2			2014		11		18		Historical Observations	>	2021		3		12		4.892	-75.324			2014	2021	8
390090	Saunders	22271	Confirmed Eruption	Summit crater	1			2014		11		12		Historical Observations	>	2021		2		19		-57.8	-26.483			2014	2021	8
312030	Pavlof	20975	Confirmed Eruption		1			2014		11		12		Historical Observations		2014		11		15		55.417	-161.894			2014	2014	1
345070	Turrialba	20974	Confirmed Eruption	Central Crater	2			2014		10		29		Historical Observations		2014		12		8		10.025	-83.767			2014	2014	1
264180	Lewotobi	20973	Uncertain Eruption		2			2014		10		6		Historical Observations		2014		10		6		-8.542	122.775			2014	2014	1
283040	Ontakesan	20964	Confirmed Eruption	Summit crater	3			2014		9		27		Historical Observations		2014		10		14		35.893	137.48			2014	2014	1
345020	Rincon de la Vieja	20961	Confirmed Eruption	Crater lake	1			2014		9		17		Historical Observations		2014		10		24		10.83	-85.324			2014	2014	1
282110	Asosan	20960	Confirmed Eruption	Naka-dake	2			2014		8		30		Historical Observations		2016		5		1		32.884	131.104			2014	2016	3
373030	Bardarbunga	20955	Confirmed Eruption	Holuhraun	0			2014		8		29		Historical Observations		2015		2		27		64.633	-17.516			2014	2015	2
342110	Pacaya	22222	Confirmed Eruption	MacKenney Crater	1			2014		8		25		Historical Observations		2015		2		17		14.382	-90.601			2014	2015	2
273030	Mayon	20959	Confirmed Eruption	Summit crater	0			2014		8		12		Historical Observations		2014		10		19		13.257	123.685			2014	2014	1
354006	Sabancaya	20953	Uncertain Eruption		1			2014		8		5		Historical Observations		2014		12		27		-15.787	-71.857			2014	2014	1
282050	Kuchinoerabujima	20952	Confirmed Eruption	Shindake	1			2014		8		3		Historical Observations		2014		8		3		30.443	130.217			2014	2014	1
344020	San Cristobal	22267	Confirmed Eruption		2			2014		7		20		Historical Observations		2014		10		1		12.702	-87.004			2014	2014	1
252140	Rabaul	20957	Confirmed Eruption	Tavurvur	3			2014		7		7		Historical Observations		2014		9		18		-4.271	152.203			2014	2014	1
357090	Copahue	20954	Confirmed Eruption	Agrio Crater	1			2014		7		4		Historical Observations		2014		12		2		-37.856	-71.183			2014	2014	1
251020	Manam	20956	Confirmed Eruption		2			2014		6		29		Historical Observations	>	2021		3		12		-4.08	145.037			2014	2021	8
233020	Fournaise, Piton de la	20919	Confirmed Eruption	Enclos Fouqué	0			2014		6		21		Historical Observations		2014		6		21		-21.244	55.708			2014	2014	1
267020	Karangetang	20914	Confirmed Eruption	Main crater	2			2014		6		8		Historical Observations		2016		3		15		2.781	125.407			2014	2016	3
300120	Zhupanovsky	20908	Confirmed Eruption		3			2014		6		6		Historical Observations		2016		3		24		53.589	159.15			2014	2016	3
312030	Pavlof	20909	Confirmed Eruption	NE flank	3			2014		5		31		Historical Observations		2014		6		2		55.417	-161.894			2014	2014	1
264050	Sangeang Api	20911	Confirmed Eruption	Summit crater	3			2014		5		30		Historical Observations		2015		11		5		-8.2	119.07			2014	2015	2
223020	Nyamulagira	20942	Confirmed Eruption		0			2014		5		30		Historical Observations		2016		5		14		-1.408	29.2			2014	2016	3
284141	Ahyi	20936	Confirmed Eruption		0			2014		4		24		Hydrophonic		2014		5		17		20.42	145.03			2014	2014	1
263300	Semeru	22221	Confirmed Eruption	Jonggring Seloko	3			2014		4		1	15	Historical Observations	>	2021		3		12		-8.108	112.922			2014	2021	8
262000	Krakatau	20932	Confirmed Eruption	Anak Krakatau	1			2014		3		31		Historical Observations		2014		3		31		-6.102	105.423			2014	2014	1
251030	Karkar	20910	Confirmed Eruption		1			2014		3		26		Historical Observations		2014		3		27		-4.649	145.964			2014	2014	1
263250	Merapi	20892	Confirmed Eruption		3			2014		3		9		Historical Observations		2014		4		20		-7.54	110.446			2014	2014	1
263180	Slamet	20933	Confirmed Eruption		2			2014		3		8		Historical Observations		2014		9		17		-7.242	109.208			2014	2014	1
263280	Kelut	20934	Confirmed Eruption		4			2014		2		13		Historical Observations		2014		2		15		-7.93	112.308			2014	2014	1
267020	Karangetang	20913	Confirmed Eruption		1			2014		2		9		Historical Observations		2014		2		9		2.781	125.407			2014	2014	1
344020	San Cristobal	20941	Confirmed Eruption		1			2014		2		4		Historical Observations		2014		4		11		12.702	-87.004			2014	2014	1
261140	Marapi	20931	Confirmed Eruption		1			2014		2		3	2	Historical Observations		2014		2		26		-0.38	100.474			2014	2014	1
255060	Kavachi	20920	Confirmed Eruption		1			2014		1		29		Historical Observations		2014		1	?	29		-8.991	157.979			2014	2014	1
311360	Shishaldin	20937	Confirmed Eruption		1			2014		1		28		Historical Observations		2015		10		16		54.756	-163.97			2014	2015	2
282110	Asosan	20935	Confirmed Eruption	Naka-dake	1			2014		1		13		Historical Observations		2014		2		19		32.884	131.104			2014	2014	1
263340	Raung	21069	Uncertain Eruption		1			2014		1		4		Historical Observations		2014		1		4		-8.119	114.056			2014	2014	1
343100	San Miguel	20906	Confirmed Eruption		2			2013		12		29		Historical Observations		2014		7		28		13.434	-88.269			2013	2014	2
284096	Nishinoshima	20916	Confirmed Eruption	Offshore to the SE (Niijima)	2			2013		11		20		Historical Observations		2015		11	?	17		27.247	140.874			2013	2015	3
263250	Merapi	20842	Confirmed Eruption		2			2013		11		18		Historical Observations		2013		11		18		-7.54	110.446			2013	2013	1
252010	Langila	22390	Uncertain Eruption					2013		10		23		Historical Observations		2013		12		1		-5.525	148.42			2013	2013	1
300120	Zhupanovsky	20907	Confirmed Eruption		3			2013		10		23		Historical Observations		2013		10		26	1	53.589	159.15			2013	2013	1
260010	Barren Island	20918	Confirmed Eruption		2			2013		10		12		Historical Observations		2016		5		17	1	12.278	93.858			2013	2016	4
263090	Tangkuban Parahu	20987	Confirmed Eruption		1			2013		10		5		Historical Observations		2013		10		5		-6.77	107.6			2013	2013	1
221020	Zubair Group	21068	Confirmed Eruption	Jadid Island	2			2013		9		28		Historical Observations		2013		11		20		15.05	42.18			2013	2013	1
344040	Telica	22195	Confirmed Eruption		1			2013		9		25		Historical Observations		2013		9		25		12.606	-86.84			2013	2013	1
261080	Sinabung	20818	Confirmed Eruption		4			2013		9		15		Historical Observations		2018		8		30		3.17	98.392			2013	2018	6
211060	Etna	20841	Confirmed Eruption	New Southeast Crater (NSEC)	2			2013		9		3		Historical Observations	>	2021		3		12		37.748	14.999			2013	2021	9	2020	2020	1
354020	Ubinas	20832	Confirmed Eruption		2			2013		9		1		Historical Observations		2016		2		27		-16.355	-70.903			2013	2016	4	2020	2020	1
264250	Iliwerung	20912	Confirmed Eruption	Hobal (submarine vent on SE flank)	0			2013		8		20		Historical Observations		2013		8		20		-8.53	123.57			2013	2013	1	2020	2020	1
300260	Klyuchevskoy	20786	Confirmed Eruption		1			2013		8		15		Historical Observations		2013		12		20		56.056	160.642			2013	2013	1	2020	2020	1
290200	Ketoi	20780	Uncertain Eruption	Pallas Peak				2013		7		25		Historical Observations		2013		8		12		47.35	152.475			2013	2013	1	2020	2020	1
357120	Villarrica	20838	Confirmed Eruption		1			2013		7		25		Historical Observations		2013		7	?	29		-39.42	-71.93			2013	2013	1	2020	2020	1
252120	Ulawun	20835	Confirmed Eruption		1			2013		7		8		Historical Observations		2013		12		21		-5.05	151.33			2013	2013	1	2020	2020	1
284090	Izu-Torishima	20828	Uncertain Eruption		2			2013		7		6		Historical Observations		2013		7		6		30.484	140.303			2013	2013	1	2020	2020	1
263340	Raung	22378	Confirmed Eruption		1			2013		6		29		Historical Observations		2013		7		31		-8.119	114.056			2013	2013	1	2020	2020	1
312070	Veniaminof	20836	Confirmed Eruption	Western intracaldera cone	3			2013		6		13		Historical Observations		2013		10		12	1	56.17	-159.38			2013	2013	1	2020	2020	1
290260	Chirinkotan	20757	Confirmed Eruption		1			2013		6		11		Historical Observations		2014		6		1	4	48.98	153.48			2013	2014	2	2020	2020	1
344020	San Cristobal	20817	Confirmed Eruption		1			2013		6		7		Historical Observations		2013		6		7		12.702	-87.004			2013	2013	1	2020	2020	1
263300	Semeru	22220	Confirmed Eruption	Jonggring Seloko	1			2013		6		4		Historical Observations		2013		11		29		-8.108	112.922			2013	2013	1	2020	2020	1
282060	Kikai	20781	Confirmed Eruption		1			2013		6		4		Historical Observations		2013		6		4		30.793	130.305			2013	2013	1	2020	2020	1
261170	Kerinci	22216	Confirmed Eruption		2			2013		6		2		Historical Observations		2013		6		2		-1.697	101.264			2013	2013	1	2020	2020	1
345070	Turrialba	20831	Confirmed Eruption	West Crater	2			2013		5		21		Historical Observations		2013		6		4		10.025	-83.767			2013	2013	1	2020	2020	1
312030	Pavlof	20807	Confirmed Eruption	Summit	3			2013		5		13		Historical Observations		2013		6		26		55.417	-161.894			2013	2013	1	2020	2020	1
344100	Masaya	22291	Uncertain Eruption		0			2013		5		11		Historical Observations		2013		5		26		11.985	-86.165			2013	2013	1	2020	2020	1
273030	Mayon	20798	Confirmed Eruption		2			2013		5		7		Historical Observations		2013		5		7		13.257	123.685			2013	2013	1	2019	2019	1
355100	Lascar	20789	Confirmed Eruption		1			2013		4		2		Historical Observations		2013		11		20		-23.37	-67.73			2013	2013	1	2019	2019	1
342110	Pacaya	20802	Confirmed Eruption	MacKenney Crater	2			2013		3		5		Historical Observations		2014		4		10		14.382	-90.601			2013	2014	2	2019	2019	1
263090	Tangkuban Parahu	20822	Confirmed Eruption	Ratu Crater	2			2013		2		21		Historical Observations		2013		3		6		-6.77	107.6			2013	2013	1	2019	2019	1
260010	Barren Island	20754	Confirmed Eruption		1			2013		2		16		Historical Observations		2013		2		16		12.278	93.858			2013	2013	1	2019	2019	1
290070	Etorofu-Yakeyama [Grozny Group]	20762	Confirmed Eruption	Etorofu-Yake-yama / Ivan Grozny	2			2013		2		16		Historical Observations		2013		4		4		45.012	147.871			2013	2013	1	2019	2019	1
284305	Mariana Back-Arc Segment at 15.5°N	21102	Confirmed Eruption	Along a 10 km N-S line at 15.4°N	0		>	2013		2		13		Historical Observations	<	2015		12		1		15.406	144.506			2013	2015	3	2019	2019	1
251030	Karkar	20779	Confirmed Eruption		3			2013		1		29		Historical Observations		2013		2		26		-4.649	145.964			2013	2013	1	2019	2019	1
352090	Sangay	22235	Confirmed Eruption		2			2013		1		25		Historical Observations		2013		5		24		-2.005	-78.341			2013	2013	1	2019	2019	1
268040	Gamkonora	20915	Uncertain Eruption		1			2013		1		23		Historical Observations		2013		5		27		1.38	127.53			2013	2013	1	2019	2019	1
252140	Rabaul	20811	Confirmed Eruption	Tavurvur	2			2013		1		19		Historical Observations		2014		3		11		-4.271	152.203			2013	2014	2	2019	2019	1
341040	Colima	20759	Confirmed Eruption	Summit crater	2			2013		1		6		Historical Observations		2017		3		7		19.514	-103.62			2013	2017	5	2019	2019	1
344020	San Cristobal	20816	Confirmed Eruption		2			2012		12		26		Historical Observations		2012		12		28		12.702	-87.004			2012	2012	1	2019	2019	1
357090	Copahue	20760	Confirmed Eruption	Agrio Crater	2			2012		12		22		Historical Observations		2013		12		10		-37.856	-71.183			2012	2013	2	2019	2019	1
252010	Langila	20788	Confirmed Eruption		1			2012		12		1		Historical Observations		2012		12		5		-5.525	148.42			2012	2012	1	2019	2019	1
300240	Tolbachik	20825	Confirmed Eruption	Tolbachinsky Dol	4			2012		11		27		Historical Observations		2013		9		5	10	55.832	160.326			2012	2013	2	2019	2019	1
241080	Tongariro	20827	Confirmed Eruption	Upper Te Maari Craters	2			2012		11		21		Historical Observations		2012		11		21		-39.157	175.632			2012	2012	1	2019	2019	1
357120	Villarrica	20837	Uncertain Eruption		1			2012		11		14		Historical Observations		2012		11	?	14		-39.42	-71.93			2012	2012	1	2019	2019	1
290150	Chirpoi	20756	Confirmed Eruption	Snow	0			2012		11		11		Historical Observations		2016		10	?	18		46.532	150.871			2012	2016	5	2019	2019	1
252120	Ulawun	20834	Confirmed Eruption		1			2012		11		6		Historical Observations		2012		12		11		-5.05	151.33			2012	2012	1	2019	2019	1
284170	Pagan	20804	Confirmed Eruption	North Pagan	2			2012		10		30		Historical Observations		2012		12	?	11		18.13	145.8			2012	2012	1	2019	2019	1
345020	Rincon de la Vieja	22161	Confirmed Eruption	Crater lake	1			2012		10		17		Historical Observations		2012		10		17		10.83	-85.324			2012	2012	1	2018	2018	1
263340	Raung	22377	Confirmed Eruption		3			2012		10		16	2	Historical Observations		2013		1		6		-8.119	114.056			2012	2013	2	2018	2018	1
264150	Paluweh	20806	Confirmed Eruption	Rokatenda	2			2012		10		8		Historical Observations		2013		10		31	7	-8.32	121.708			2012	2013	2	2018	2018	1
290390	Alaid	20750	Confirmed Eruption	Summit crater	2			2012		10		5		Historical Observations		2012		12		12		50.861	155.565			2012	2012	1	2018	2018	1
261140	Marapi	20797	Confirmed Eruption		1			2012		9		26		Historical Observations		2012		9		26		-0.38	100.474			2012	2012	1	2018	2018	1
268060	Gamalama	20766	Confirmed Eruption	Summit crater	1			2012		9		15		Historical Observations		2012		9		17		0.8	127.33			2012	2012	1	2018	2018	1
266100	Lokon-Empung	20794	Confirmed Eruption	Tompaluan	2			2012		9		15		Historical Observations		2013		9		9		1.358	124.792			2012	2013	2	2018	2018	1
344020	San Cristobal	20815	Confirmed Eruption		2			2012		9		8		Historical Observations		2012		9		15		12.702	-87.004			2012	2012	1	2018	2018	1
234010	Heard	20768	Confirmed Eruption	Mawson Peak	0			2012		9		5	4	Historical Observations	>	2021		1		20		-53.106	73.513			2012	2021	10	2018	2018	1
300260	Klyuchevskoy	20785	Confirmed Eruption		1			2012		9	?	1		Historical Observations		2013		1		28	3	56.056	160.642			2012	2013	2	2018	2018	1
266030	Soputan	20821	Confirmed Eruption		3			2012		8		26		Historical Observations		2012		9		19		1.112	124.737			2012	2012	1	2018	2018	1
290070	Etorofu-Yakeyama [Grozny Group]	20761	Confirmed Eruption	Etorofu-Yake-yama / Ivan Grozny	2			2012		8		16		Historical Observations		2012		8		25		45.012	147.871			2012	2012	1	2018	2018	1
241040	Whakaari/White Island	20839	Confirmed Eruption	1978/90 Crater Complex	2			2012		8		7		Historical Observations		2013		10		11		-37.52	177.18			2012	2013	2	2018	2018	1
241080	Tongariro	20826	Confirmed Eruption	Upper Te Maari Craters	2			2012		8		6		Historical Observations		2012		8		7		-39.157	175.632			2012	2012	1	2018	2018	1
242050	Monowai	20799	Confirmed Eruption		0			2012		8		3		Hydrophonic		2012		8		4		-25.887	-177.188			2012	2012	1	2018	2018	1
252010	Langila	22389	Uncertain Eruption		0			2012		7		21		Historical Observations		2012		7		21		-5.525	148.42			2012	2012	1	2018	2018	1
242005	Havre Seamount	20748	Confirmed Eruption		1			2012		7		17		Historical Observations		2012		7		19		-31.08	-179.033			2012	2012	1	2018	2018	1
267020	Karangetang	20776	Confirmed Eruption		2			2012		5		14		Historical Observations		2013		9		5		2.781	125.407			2012	2013	2	2018	2018	1
351080	Galeras	20764	Confirmed Eruption	Summit crater	2			2012		5		13		Historical Observations		2014		1		30	1	1.22	-77.37			2012	2014	3	2018	2018	1
264270	Sirung	20819	Confirmed Eruption		2			2012		5		8		Historical Observations		2012		5		12		-8.508	124.13			2012	2012	1	2018	2018	1
252120	Ulawun	20833	Confirmed Eruption		1			2012		5		7		Historical Observations		2012		5		31		-5.05	151.33			2012	2012	1	2018	2018	1
252080	Witori	20805	Confirmed Eruption	Pago	2			2012		5		3		Historical Observations		2012		7		11		-5.576	150.516			2012	2012	1	2018	2018	1
344100	Masaya	22143	Confirmed Eruption	Santiago Crater	1			2012		4		30		Historical Observations		2012		6		8		11.985	-86.165			2012	2012	1	2018	2018	1
261140	Marapi	20796	Confirmed Eruption		1			2012		3		1	3	Historical Observations		2012		5		18		-0.38	100.474			2012	2012	1	2018	2018	1
351020	Ruiz, Nevado del	20814	Confirmed Eruption	Arenas Crater	3			2012		2		22		Historical Observations		2013		7	?	12		4.892	-75.324			2012	2013	2	2018	2018	1
345020	Rincon de la Vieja	20813	Confirmed Eruption	Crater lake	1			2012		2		19		Historical Observations		2012		4		14		10.83	-85.324			2012	2012	1	2017	2017	1
311110	Kanaga	20774	Confirmed Eruption		2			2012		2		18		Historical Observations		2012		2		18		51.923	-177.168			2012	2012	1	2017	2017	1
284120	Ioto	20772	Confirmed Eruption	Asodai	1			2012		2		10		Historical Observations		2012		5		2		24.751	141.289			2012	2012	1	2017	2017	1
251030	Karkar	20778	Confirmed Eruption		3			2012		2		1		Historical Observations		2012		2		1		-4.649	145.964			2012	2012	1	2017	2017	1
345070	Turrialba	20830	Confirmed Eruption	West Crater (SE flank)	2			2012		1		12		Historical Observations		2012		1		18		10.025	-83.767			2012	2012	1	2017	2017	1
357091	Callaqui	20755	Uncertain Eruption					2012		1		2		Historical Observations		2012		1		2		-37.92	-71.45			2012	2012	1	2017	2017	1
264230	Lewotolok	20791	Confirmed Eruption	Summit	1			2012		1		2		Historical Observations		2012		1		14		-8.274	123.508			2012	2012	1	2017	2017	1
221020	Zubair Group	20840	Confirmed Eruption	Sholan Island	2			2011		12		18		Historical Observations		2012		1		12		15.05	42.18			2011	2012	2	2017	2017	1
261170	Kerinci	22217	Confirmed Eruption		1			2011		12		15		Historical Observations		2011		12		15		-1.697	101.264			2011	2011	1	2017	2017	1
268060	Gamalama	20765	Confirmed Eruption		2			2011		12		5		Historical Observations		2011		12		23		0.8	127.33			2011	2011	1	2017	2017	1
352080	Tungurahua	22215	Confirmed Eruption		3			2011		11		27		Historical Observations		2016		3		16		-1.467	-78.442			2011	2016	6	2017	2017	1
223020	Nyamulagira	20801	Confirmed Eruption	NW flank	2			2011		11		6		Historical Observations		2012		3	?	16		-1.408	29.2			2011	2012	2	2017	2017	1
300260	Klyuchevskoy	20784	Uncertain Eruption					2011		11		2		Historical Observations		2011		11		2		56.056	160.642			2011	2011	1	2017	2017	1
358057	Hudson, Cerro	20770	Confirmed Eruption	S and SE edge of the caldera	2			2011		10		26		Historical Observations		2011		11		1		-45.9	-72.97			2011	2011	1	2017	2017	1
383020	Hierro	20769	Confirmed Eruption	Submarine S flank, Tagaro cone	2			2011		10		10		Historical Observations		2012		3		5		27.73	-18.03			2011	2012	2	2017	2017	1
257020	Gaua	20938	Confirmed Eruption	Mt. Garat	1			2011		9		17		Historical Observations		2011		10		10		-14.27	167.5			2011	2011	1	2017	2017	1
345020	Rincon de la Vieja	20812	Confirmed Eruption	Crater lake	1			2011		8		22		Historical Observations		2011		9		27		10.83	-85.324			2011	2011	1	2017	2017	1
344020	San Cristobal	10898	Confirmed Eruption		1			2011		8	?	21		Historical Observations		2011		10		23		12.702	-87.004			2011	2011	1	2017	2017	1
261140	Marapi	20795	Confirmed Eruption		2			2011		8		3		Historical Observations		2011		10		12		-0.38	100.474			2011	2011	1	2017	2017	1
262000	Krakatau	20787	Confirmed Eruption	Anak Krakatau	2			2011		7		31		Historical Observations		2012		9		9	1	-6.102	105.423			2011	2012	2	2017	2017	1
252010	Langila	22388	Uncertain Eruption		0			2011		7		28		Historical Observations		2011		7		28		-5.525	148.42			2011	2011	1	2017	2017	1
311240	Cleveland	20758	Confirmed Eruption	Summit crater	2			2011		7		19	7	Historical Observations		2015		8		18		52.825	-169.944			2011	2015	5	2017	2017	1
266030	Soputan	20820	Confirmed Eruption		3			2011		7		3		Historical Observations		2011		8		15		1.112	124.737			2011	2011	1	2017	2017	1
266100	Lokon-Empung	20793	Confirmed Eruption	Tompaluan	2			2011		6		26		Historical Observations		2012		5		1		1.358	124.792			2011	2012	2	2017	2017	1
222120	Lengai, Ol Doinyo	20790	Confirmed Eruption	North Crater	0		<	2011		6		22		Historical Observations		2014		7		15	10	-2.764	35.914			2011	2014	4	2017	2017	1
221101	Nabro	20800	Confirmed Eruption		4			2011		6		13		Historical Observations		2012		6	?	3		13.37	41.7			2011	2012	2	2017	2017	1
352090	Sangay	22234	Confirmed Eruption		2			2011		6		6		Historical Observations		2012		9		19		-2.005	-78.341			2011	2012	2	2016	2016	1
357150	Puyehue-Cordon Caulle	20809	Confirmed Eruption	Cordón Caulle, N of the 1960 eruption fissure	5			2011		6		4		Historical Observations		2012		4	?	21		-40.59	-72.117			2011	2012	2	2016	2016	1
257030	Ambae	20752	Confirmed Eruption	Lake Manaro	1			2011		6		4		Historical Observations		2011		7		10		-15.389	167.835			2011	2011	1	2016	2016	1
373010	Grimsvotn	20767	Confirmed Eruption	SW part of the caldera	4			2011		5		21		Historical Observations		2011		5		28		64.416	-17.316			2011	2011	1	2016	2016	1
282110	Asosan	20753	Confirmed Eruption	Naka-dake	1			2011		5		15		Historical Observations		2011		6		9		32.884	131.104			2011	2011	1	2016	2016	1
263300	Semeru	22219	Confirmed Eruption	Jonggring Seloko	2			2011		5		13		Historical Observations		2012		7	?	20		-8.108	112.922			2011	2012	2	2016	2016	1
284170	Pagan	20803	Confirmed Eruption	North Pagan	2			2011		4	?	23		Historical Observations		2011		9	?	1		18.13	145.8			2011	2011	1	2016	2016	1
352080	Tungurahua	22214	Confirmed Eruption		2			2011		4		20		Historical Observations		2011		5		26		-1.467	-78.442			2011	2011	1	2016	2016	1
331021	Axial Seamount	20921	Confirmed Eruption	E caldera rim to 10 km S	0			2011		4		6		Historical Observations		2011		4		12		45.95	-130			2011	2011	1	2016	2016	1
351080	Galeras	20763	Uncertain Eruption	Summit crater				2011		3		31		Historical Observations		2011		4		1		1.22	-77.37			2011	2011	1	2016	2016	1
300260	Klyuchevskoy	20783	Confirmed Eruption		1			2011		3		30		Historical Observations		2011		7		3		56.056	160.642			2011	2011	1	2016	2016	1
252140	Rabaul	20810	Confirmed Eruption	Tavurvur	2			2011		3		29		Historical Observations		2011		8		12		-4.271	152.203			2011	2011	1	2016	2016	1
267020	Karangetang	20775	Confirmed Eruption		2			2011		3		11		Historical Observations		2011		8		13		2.781	125.407			2011	2011	1	2016	2016	1
344040	Telica	20823	Confirmed Eruption		2			2011		3		7		Historical Observations		2011		6		14		12.606	-86.84			2011	2011	1	2016	2016	1
266100	Lokon-Empung	20792	Confirmed Eruption	Tompaluan	1			2011		2		22		Historical Observations		2011		2		22		1.358	124.792			2011	2011	1	2016	2016	1
357040	Planchon-Peteroa	20808	Confirmed Eruption	Peteroa	3			2011		2		17		Historical Observations		2011		6		26	1	-35.223	-70.568			2011	2011	1	2016	2016	1
282090	Kirishimayama	20782	Confirmed Eruption	Shinmoe-dake	2			2011		1		19		Historical Observations		2011		9		7		31.934	130.862			2011	2011	1	2016	2016	1
345070	Turrialba	20829	Confirmed Eruption		1			2011		1		14		Historical Observations		2011		1		14		10.025	-83.767			2011	2011	1	2016	2016	1
221041	Dallol	20939	Confirmed Eruption	Dallol crater	0			2011		1		4	3	Historical Observations		2011		1		4	3	14.242	40.3			2011	2011	1	2016	2016	1
263310	Tengger Caldera	16064	Confirmed Eruption	Bromo	3	?		2010		11		26		Historical Observations		2011		6		13		-7.942	112.95			2010	2011	2	2016	2016	1
352080	Tungurahua	11645	Confirmed Eruption		3	?		2010		11		22		Historical Observations		2011		1		2		-1.467	-78.442			2010	2011	2	2016	2016	1
300230	Kizimen	19264	Confirmed Eruption		3			2010		11	?	11		Historical Observations		2013		9	?	13		55.131	160.32			2010	2013	4	2016	2016	1
273010	Bulusan	16772	Confirmed Eruption	Summit crater	2			2010		11		6		Historical Observations		2011		5		13		12.769	124.056			2010	2011	2	2016	2016	1
263250	Merapi	15925	Confirmed Eruption		4			2010		10		26		Historical Observations		2012		7		15		-7.54	110.446			2010	2012	3	2016	2016	1
262000	Krakatau	15634	Confirmed Eruption	Anak Krakatau	2			2010		10	?	25		Historical Observations		2011		3		9	8	-6.102	105.423			2010	2011	2	2016	2016	1
233020	Fournaise, Piton de la	14392	Confirmed Eruption	2.5 km SE and 1 km NW of Dolomieu	1	?		2010		10		14		Historical Observations		2010		12		10		-21.244	55.708			2010	2010	1	2015	2015	1
290240	Sarychev Peak	18820	Uncertain Eruption		2	?		2010		9		20				2010		9		20		48.092	153.2			2010	2010	1	2015	2015	1
260010	Barren Island	15388	Confirmed Eruption		2			2010		9		17		Historical Observations		2011		6		22		12.278	93.858			2010	2011	2	2015	2015	1
311240	Cleveland	19820	Uncertain Eruption		2	?		2010		9		12	1			2010		9		26		52.825	-169.944			2010	2010	1	2015	2015	1
357040	Planchon-Peteroa	11947	Confirmed Eruption	Peteroa	2			2010		9		6		Historical Observations		2010		10		13		-35.223	-70.568			2010	2010	1	2015	2015	1
261080	Sinabung	15404	Confirmed Eruption		2			2010		8		27		Historical Observations		2010		9	?	18		3.17	98.392			2010	2010	1	2015	2015	1
211060	Etna	13854	Confirmed Eruption	Bocca Nuova, NE and SE Craters	1			2010		8		25		Historical Observations		2013		4		27		37.748	14.999			2010	2013	4	2015	2015	1
351080	Galeras	11381	Confirmed Eruption		2			2010		8		25		Historical Observations		2010		8		25		1.22	-77.37			2010	2010	1	2015	2015	1
251020	Manam	14935	Confirmed Eruption	South Crater, Main Crater	2			2010		8	?	10		Historical Observations		2013		12	>	15		-4.08	145.037			2010	2013	4	2015	2015	1
267020	Karangetang	16544	Confirmed Eruption		3	?		2010		8		6		Historical Observations		2010		12	?	16	15	2.781	125.407			2010	2010	1	2015	2015	1
345070	Turrialba	11248	Uncertain Eruption		2			2010		7		24				2010		8		15		10.025	-83.767			2010	2010	1	2015	2015	1
252140	Rabaul	15101	Confirmed Eruption	Tavurvur	1	?		2010		7		23		Historical Observations		2010		7		25		-4.271	152.203			2010	2010	1	2015	2015	1
354020	Ubinas	11792	Uncertain Eruption		1	?		2010		7		18				2010		7		18		-16.355	-70.903			2010	2010	1	2015	2015	1
290380	Ebeko	18879	Confirmed Eruption		1			2010		7		2		Historical Observations		2010		7		9	7	50.686	156.014			2010	2010	1	2015	2015	1
290270	Ekarma	18833	Confirmed Eruption	Upper SW flank	2			2010		6		30		Historical Observations		2010		8	?	10		48.958	153.93			2010	2010	1	2015	2015	1
284120	Ioto	18423	Uncertain Eruption		1			2010		6		19		Historical Observations		2010		6		19		24.751	141.289			2010	2010	1	2015	2015	1
344020	San Cristobal	10897	Confirmed Eruption		2			2010		6		9		Historical Observations		2011		1		13		12.702	-87.004			2010	2011	2	2015	2015	1
300070	Gorely	19026	Confirmed Eruption		1			2010		6		6		Historical Observations		2010		6	?	22		52.559	158.03			2010	2010	1	2015	2015	1
311240	Cleveland	19819	Confirmed Eruption		2			2010		5		30		Historical Observations		2010		6	?	2		52.825	-169.944			2010	2010	1	2015	2015	1
284193	South Sarigan Seamount	18529	Confirmed Eruption		3	?		2010		5		27		Historical Observations		2010		5		29		16.58	145.78			2010	2010	1	2015	2015	1
252120	Ulawun	15077	Confirmed Eruption		2	?		2010		5		26	4	Historical Observations		2011		5		27		-5.05	151.33			2010	2011	2	2015	2015	1
300250	Bezymianny	19388	Confirmed Eruption		3	?		2010		5	?	21		Historical Observations	>	2021		3		8		55.972	160.595			2010	2021	12	2015	2015	1
284170	Pagan	18524	Confirmed Eruption	North Pagan	1			2010		5		3		Historical Observations		2010		8		11		18.13	145.8			2010	2010	1	2015	2015	1
284040	Miyakejima	18282	Confirmed Eruption		1			2010		4		11		Historical Observations		2010		7		21		34.094	139.526			2010	2010	1	2015	2015	1
211060	Etna	13853	Confirmed Eruption	SE Crater	2			2010		4		8		Historical Observations		2010		4		8		37.748	14.999			2010	2010	1	2015	2015	1
282090	Kirishimayama	17165	Confirmed Eruption	Shinmoe-dake	1			2010		3		30		Historical Observations		2010		7		10		31.934	130.862			2010	2010	1	2015	2015	1
372020	Eyjafjallajokull	12563	Confirmed Eruption	ENE flank (Fimmvörduháls) and summit	4			2010		3		20		Historical Observations		2010		6		23		63.633	-19.633			2010	2010	1	2014	2014	1
251030	Karkar	14951	Uncertain Eruption		1			2010		2		25				2010		2		26		-4.649	145.964			2010	2010	1	2014	2014	1
284130	Fukutoku-Oka-no-Ba	18469	Confirmed Eruption		1			2010		2		3		Historical Observations		2010		4	?	8		24.285	141.481			2010	2010	1	2014	2014	1
263300	Semeru	22218	Confirmed Eruption	Jonggring Seloko	2			2010		1		5		Historical Observations		2010		11		29		-8.108	112.922			2010	2010	1	2014	2014	1
345070	Turrialba	11247	Confirmed Eruption	SW crater	2			2010		1		5		Historical Observations		2010		3	?	7		10.025	-83.767			2010	2010	1	2014	2014	1
223020	Nyamulagira	14085	Confirmed Eruption	Summit caldera and SSE flank	1	?		2010		1		2		Historical Observations		2010		1		29		-1.408	29.2			2010	2010	1	2014	2014	1
352080	Tungurahua	11644	Confirmed Eruption		3			2010		1		1		Historical Observations		2010		7		29		-1.467	-78.442			2010	2010	1	2014	2014	1
300250	Bezymianny	19387	Confirmed Eruption		3	?		2009		12		17		Historical Observations		2010		2	?	16		55.972	160.595			2009	2010	2	2014	2014	1
344120	Concepcion	11080	Confirmed Eruption		1			2009		12		11		Historical Observations		2011		3		12		11.538	-85.622			2009	2011	3	2014	2014	1
357120	Villarrica	12184	Confirmed Eruption		1			2009		11		22		Historical Observations		2012		4		20		-39.42	-71.93			2009	2012	4	2014	2014	1
345040	Poas	11193	Confirmed Eruption		1			2009		11		16	15	Historical Observations		2014		10		13		10.2	-84.233			2009	2014	6	2014	2014	1
282090	Kirishimayama	17164	Uncertain Eruption	Shinmoe-dake	1			2009		11		15		Historical Observations		2009		11		15		31.934	130.862			2009	2009	1	2014	2014	1
233020	Fournaise, Piton de la	14391	Confirmed Eruption	Dolomieu crater and east flank	1	?		2009		11		5		Historical Observations		2010		1		12		-21.244	55.708			2009	2010	2	2014	2014	1
311240	Cleveland	19828	Confirmed Eruption		2			2009		10		2		Historical Observations		2009		12	?	12		52.825	-169.944			2009	2009	1	2014	2014	1
257020	Gaua	15231	Confirmed Eruption	Mt. Garat	2			2009		9		27		Historical Observations		2010		6		19		-14.27	167.5			2009	2010	2	2014	2014	1
263200	Dieng Volcanic Complex	15793	Confirmed Eruption	Sileri Crater	1			2009		9		27		Historical Observations		2009		9		27		-7.2	109.879			2009	2009	1	2014	2014	1
252010	Langila	15003	Confirmed Eruption	Crater 2	2			2009		9	<	16	15	Historical Observations		2010		2	?	16	15	-5.525	148.42			2009	2010	2	2014	2014	1
273030	Mayon	16819	Confirmed Eruption		2			2009		9		15		Historical Observations		2010		1	?	1		13.257	123.685			2009	2010	2	2014	2014	1
344020	San Cristobal	10896	Confirmed Eruption		2	?		2009		9		6		Historical Observations		2009		12	?	26		12.702	-87.004			2009	2009	1	2014	2014	1
290120	Kolokol Group	18776	Uncertain Eruption	Berg	2			2009		8		26										46.042	150.083			2009		0	2014	2014	1
300260	Klyuchevskoy	19485	Confirmed Eruption		2			2009		8	?	1		Historical Observations		2010		12	?	20		56.056	160.642			2009	2010	2	2014	2014	1
221115	Manda Hararo	13944	Confirmed Eruption		2	?		2009		6		28		Historical Observations		2009		7	?	1		12.17	40.82			2009	2009	1	2014	2014	1
311240	Cleveland	19827	Confirmed Eruption		2			2009		6		25		Historical Observations		2009		6		25		52.825	-169.944			2009	2009	1	2014	2014	1
290240	Sarychev Peak	18819	Confirmed Eruption		4			2009		6		11		Historical Observations		2009		7	?	16	15	48.092	153.2			2009	2009	1	2014	2014	1
242050	Monowai	22197	Confirmed Eruption		0			2009		5		4	3	Hydrophonic		2009		12		16	4	-25.887	-177.188			2009	2009	1	2014	2014	1
264030	Rinjani	16227	Confirmed Eruption	NE flank of Gunung Barujari	2			2009		5		2		Historical Observations		2010		5		23		-8.42	116.47			2009	2010	2	2014	2014	1
264050	Sangeang Api	16253	Uncertain Eruption					2009		5		1				2009		6		3		-8.2	119.07			2009	2009	1	2014	2014	1
251030	Karkar	14950	Uncertain Eruption					2009		5		1	30									-4.649	145.964			2009		0	2014	2014	1
263180	Slamet	15765	Confirmed Eruption		1			2009		4		21		Historical Observations		2009		6	?	22		-7.242	109.208			2009	2009	1	2013	2013	1
284170	Pagan	18523	Uncertain Eruption	North Pagan	2			2009		4		15										18.13	145.8			2009		0	2013	2013	1
353010	Fernandina	11677	Confirmed Eruption	SW flank (400 m)	2			2009		4		10		Historical Observations		2009		4	?	28		-0.37	-91.55			2009	2009	1	2013	2013	1
284040	Miyakejima	18281	Confirmed Eruption		1			2009		4		1		Historical Observations		2009		4		1		34.094	139.526			2009	2009	1	2013	2013	1
261170	Kerinci	15533	Confirmed Eruption		1			2009		4	?	1		Historical Observations		2009		6	?	19		-1.697	101.264			2009	2009	1	2013	2013	1
262000	Krakatau	15633	Confirmed Eruption	Anak Krakatau	2			2009		3	?	25		Historical Observations		2009		9	?	16	15	-6.102	105.423			2009	2009	1	2013	2013	1
243040	Hunga Tonga-Hunga Ha'apai	14733	Confirmed Eruption	Hunga Ha'apai	2			2009		3	?	17		Historical Observations		2009		3		22	1	-20.536	-175.382			2009	2009	1	2013	2013	1
313030	Redoubt	20391	Confirmed Eruption	South of 1990 dome	3			2009		3		15		Historical Observations		2009		7		1	30	60.485	-152.742			2009	2009	1	2013	2013	1
352020	Guagua Pichincha	11502	Uncertain Eruption		1	?		2009		2		16				2009		2		17		-0.171	-78.598			2009	2009	1	2013	2013	1
290380	Ebeko	18878	Confirmed Eruption		1			2009		2		11		Historical Observations		2009		7	?	13		50.686	156.014			2009	2009	1	2013	2013	1
357120	Villarrica	12183	Confirmed Eruption		1			2009		1		29		Historical Observations		2009		3	?	24		-39.42	-71.93			2009	2009	1	2013	2013	1
357091	Callaqui	11998	Uncertain Eruption					2009		1		22				2009		1		22		-37.92	-71.45			2009	2009	1	2013	2013	1
357070	Chillan, Nevados de	11993	Uncertain Eruption					2009		1		21				2009		1		22		-36.868	-71.378			2009	2009	1	2013	2013	1
283110	Asamayama	17812	Confirmed Eruption		2			2009		1		21		Historical Observations		2009		5		2		36.406	138.523			2009	2009	1	2013	2013	1
242010	Curtis Island	14680	Uncertain Eruption	5-6 km NNE of Curtis Island	0			2009		1		18				2009		1		19		-30.543	-178.556			2009	2009	1	2013	2013	1
263200	Dieng Volcanic Complex	15792	Confirmed Eruption	Sibanteng crater	1			2009		1		15		Historical Observations		2009		1		15		-7.2	109.879			2009	2009	1	2013	2013	1
345040	Poas	11192	Confirmed Eruption		1			2009		1		12		Historical Observations		2009		3	?	21		10.2	-84.233			2009	2009	1	2013	2013	1
311240	Cleveland	19826	Confirmed Eruption		2			2009		1		2		Historical Observations		2009		1		21		52.825	-169.944			2009	2009	1	2013	2013	1
261230	Dempo	15575	Confirmed Eruption		1	?		2009		1		1		Historical Observations		2009		1		1		-4.016	103.121			2009	2009	1	2013	2013	1
300090	Koryaksky	19045	Confirmed Eruption	Upper NW flank (3000 m)	2			2008		12	?	23		Historical Observations		2009		8		27		53.321	158.712			2008	2009	2	2013	2013	1
267020	Karangetang	16543	Confirmed Eruption		2			2008		11	?	29		Historical Observations		2010		3	?	24		2.781	125.407			2008	2010	3	2013	2013	1
344020	San Cristobal	10895	Confirmed Eruption		1			2008		11		21		Historical Observations		2008		11		21		12.702	-87.004			2008	2008	1	2013	2013	1
285070	Akan	18707	Confirmed Eruption	Me-Akan (Ponmachineshiri)	1			2008		11		18		Historical Observations		2008		11		28		43.384	144.013			2008	2008	1	2013	2013	1
243120	Tafu-Maka	14799	Confirmed Eruption	Maka	0			2008		11	?	16	15	Historical Observations		2008		11	?	16	15	-15.37	-174.23			2008	2008	1	2013	2013	1
243130	West Mata	14800	Confirmed Eruption	Prometheus and Hades vents	0			2008		11	<	16	15	Historical Observations		2009		5	>	16	15	-15.1	-173.75			2008	2009	2	2013	2013	1
221060	Alu-Dalafilla	13927	Confirmed Eruption	W and NW of Dalaffilla	3	?		2008		11		3		Historical Observations		2008		12	?	16	15	13.793	40.553			2008	2008	1	2013	2013	1
351050	Huila, Nevado del	11314	Confirmed Eruption	Upper SW side of Pico Central	3	?		2008		10	?	26		Historical Observations		2012		1	?	14		2.93	-76.03			2008	2012	5	2013	2013	1
357120	Villarrica	12182	Confirmed Eruption		1			2008		10		26		Historical Observations								-39.42	-71.93			2008		0	2013	2013	1
351080	Galeras	11380	Confirmed Eruption		3			2008		10	?	21		Historical Observations		2010		1	?	2		1.22	-77.37			2008	2010	3	2013	2013	1
300260	Klyuchevskoy	19484	Confirmed Eruption		1			2008		10		8		Historical Observations		2009		4	?	16		56.056	160.642			2008	2009	2	2012	2012	1
233020	Fournaise, Piton de la	14390	Confirmed Eruption	Dolomieu crater	1			2008		9		21		Historical Observations		2009		2		4		-21.244	55.708			2008	2009	2	2012	2012	1
256010	Tinakula	15210	Confirmed Eruption		1	?		2008		9	?	19		Historical Observations		2008		11	?	29		-10.386	165.804			2008	2008	1	2012	2012	1
282090	Kirishimayama	17163	Confirmed Eruption	Shinmoe-dake crater and W flank	1			2008		8		22		Historical Observations		2008		8		22		31.934	130.862			2008	2008	1	2012	2012	1
373030	Bardarbunga	12896	Uncertain Eruption	Loki-Fögrufjöll (West Loki cauldron)	0			2008		8		16	15									64.633	-17.516			2008		0	2012	2012	1
273030	Mayon	16818	Confirmed Eruption		1			2008		8		10		Historical Observations		2008		8		10		13.257	123.685			2008	2008	1	2012	2012	1
283110	Asamayama	17811	Confirmed Eruption		1			2008		8		10		Historical Observations		2008		8		14		36.406	138.523			2008	2008	1	2012	2012	1
311130	Kasatochi	19745	Confirmed Eruption		4			2008		8		7		Historical Observations		2008		8	?	9		52.177	-175.508			2008	2008	1	2012	2012	1
344120	Concepcion	11077	Confirmed Eruption		1			2008		7		30		Historical Observations		2008		7		30		11.538	-85.622			2008	2008	1	2012	2012	1
290360	Chikurachki	18860	Confirmed Eruption		2			2008		7		29		Historical Observations		2008		8	?	8		50.324	155.461			2008	2008	1	2012	2012	1
352010	Reventador	11449	Confirmed Eruption		2			2008		7		27		Historical Observations	>	2021		2		15		-0.077	-77.656			2008	2021	14	2012	2012	1
252070	Krummel-Garbuna-Welcker	15009	Confirmed Eruption		2			2008		7		13		Historical Observations		2008		10		4		-5.416	150.027			2008	2008	1	2012	2012	1
311290	Okmok	19852	Confirmed Eruption	NE caldera floor	4	?		2008		7		12		Historical Observations		2008		8		19		53.43	-168.13			2008	2008	1	2012	2012	1
300250	Bezymianny	19386	Confirmed Eruption		3	?		2008		7		11		Historical Observations		2008		8	?	23		55.972	160.595			2008	2008	1	2012	2012	1
344040	Telica	10943	Confirmed Eruption		1			2008		7		5	4	Historical Observations		2008		7		5	4	12.606	-86.84			2008	2008	1	2012	2012	1
241130	Rumble III	14676	Confirmed Eruption		0			2008	1	7		2	182	Historical Observations								-35.745	178.478			2008		0	2012	2012	1
344020	San Cristobal	10894	Confirmed Eruption		1			2008		6		22		Historical Observations		2008		8		5	4	12.702	-87.004			2008	2008	1	2012	2012	1
263340	Raung	16166	Confirmed Eruption		2			2008		6		12		Historical Observations		2008		6	?	17		-8.119	114.056			2008	2008	1	2012	2012	1
266030	Soputan	16439	Confirmed Eruption		3	?		2008		6		6		Historical Observations		2008		11	?	2		1.112	124.737			2008	2008	1	2012	2012	1
353060	Azul, Cerro	11720	Confirmed Eruption	Summit and SE flank	1	?		2008		5		29		Historical Observations		2008		6		17		-0.92	-91.408			2008	2008	1	2012	2012	1
257040	Ambrym	15297	Confirmed Eruption	Benbow and Marum	2			2008		5		23		Historical Observations		2018		12		17		-16.25	168.12			2008	2018	11	2012	2012	1
263250	Merapi	15924	Uncertain Eruption					2008		5		19										-7.54	110.446			2008		0	2012	2012	1
260010	Barren Island	15387	Confirmed Eruption		2			2008		5		13		Historical Observations		2010		4	?	19		12.278	93.858			2008	2010	3	2012	2012	1
211060	Etna	13852	Confirmed Eruption	East base of NE Crater (3000-2650 m)	1			2008		5		13		Historical Observations		2009		7		4		37.748	14.999			2008	2009	2	2012	2012	1
268060	Gamalama	16677	Uncertain Eruption		1			2008		5		10										0.8	127.33			2008		0	2012	2012	1
284040	Miyakejima	18280	Confirmed Eruption		1			2008		5		8		Historical Observations		2008		5		8		34.094	139.526			2008	2008	1	2012	2012	1
358041	Chaiten	12271	Confirmed Eruption		4			2008		5		2		Historical Observations		2011		5		31	3	-42.833	-72.646			2008	2011	4	2012	2012	1
344100	Masaya	11042	Confirmed Eruption	Santiago	1			2008		4		29		Historical Observations		2008		12	?	17		11.985	-86.165			2008	2008	1	2012	2012	1
264160	Egon	16278	Confirmed Eruption		2			2008		4		15		Historical Observations		2008		4	?	28		-8.676	122.455			2008	2008	1	2012	2012	1
268030	Ibu	16582	Confirmed Eruption		1			2008		4		5		Historical Observations	>	2021		3		12		1.488	127.63			2008	2021	14	2011	2011	1
261170	Kerinci	15532	Confirmed Eruption		1			2008		3		24		Historical Observations								-1.697	101.264			2008		0	2011	2011	1
267020	Karangetang	16542	Uncertain Eruption		1	?		2008		3		12										2.781	125.407			2008		0	2011	2011	1
252070	Krummel-Garbuna-Welcker	15008	Confirmed Eruption		1			2008		3		11		Historical Observations		2008		3		13		-5.416	150.027			2008	2008	1	2011	2011	1
257050	Lopevi	15323	Uncertain Eruption		2			2008		2		24				2008		2	?	24		-16.507	168.346			2008	2008	1	2011	2011	1
312070	Veniaminof	20178	Confirmed Eruption	Western intracaldera cone	1			2008		2		22		Historical Observations		2008		3		1		56.17	-159.38			2008	2008	1	2011	2011	1
282110	Asosan	17351	Confirmed Eruption	Naka-dake	1			2008		2		17		Historical Observations		2008		2		17		32.884	131.104			2008	2008	1	2011	2011	1
311360	Shishaldin	20101	Uncertain Eruption		1	?		2008		2		12				2008		2		12		54.756	-163.97			2008	2008	1	2011	2011	1
242050	Monowai	14723	Confirmed Eruption		0			2008		2	?	8		Hydrophonic		2008		2	?	8		-25.887	-177.188			2008	2008	1	2011	2011	1
352020	Guagua Pichincha	11501	Uncertain Eruption		1	?		2008		2		1				2008		2		1		-0.171	-78.598			2008	2008	1	2011	2011	1
345040	Poas	11191	Confirmed Eruption		1			2008		1		13		Historical Observations		2008		1		13		10.2	-84.233			2008	2008	1	2011	2011	1
284040	Miyakejima	18279	Confirmed Eruption		1			2008		1		7		Historical Observations		2008		1		7		34.094	139.526			2008	2008	1	2011	2011	1
351050	Huila, Nevado del	11313	Confirmed Eruption		2	?		2008		1		2		Historical Observations		2008		4	?	16	15	2.93	-76.03			2008	2008	1	2011	2011	1
357110	Llaima	12077	Confirmed Eruption	Summit and upper east flank	3			2008		1		1		Historical Observations		2009		6		12	4	-38.692	-71.729			2008	2009	2	2011	2011	1
252120	Ulawun	15076	Uncertain Eruption		1	?		2007		12		25										-5.05	151.33			2007		0	2011	2011	1
261160	Talang	15499	Confirmed Eruption		2			2007		11		27		Historical Observations		2007		12	?	16	15	-0.979	100.681			2007	2007	1	2011	2011	1
284200	Anatahan	18538	Confirmed Eruption		2			2007		11		27	3	Historical Observations		2008		8	?	9		16.35	145.67			2007	2008	2	2011	2011	1
344120	Concepcion	11076	Confirmed Eruption		2	?		2007		11		24		Historical Observations		2007		12		20		11.538	-85.622			2007	2007	1	2011	2011	1
344020	San Cristobal	10893	Confirmed Eruption		1	?		2007		11	<	8		Historical Observations								12.702	-87.004			2007		0	2011	2011	1
344040	Telica	10942	Confirmed Eruption		1	?		2007		10		28	3	Historical Observations		2008		2		18		12.606	-86.84			2007	2008	2	2011	2011	1
262000	Krakatau	15626	Confirmed Eruption	Anak Krakatau	2			2007		10		23		Historical Observations		2008		8	?	30		-6.102	105.423			2007	2008	2	2011	2011	1
263280	Kelut	15958	Confirmed Eruption		2			2007		10	?	16	15	Historical Observations		2008		4	<	16	15	-7.93	112.308			2007	2008	2	2011	2011	1
351080	Galeras	11379	Confirmed Eruption		3	?		2007		10		4		Historical Observations		2008		1		17		1.22	-77.37			2007	2008	2	2011	2011	1
221010	Tair, Jebel at	13923	Confirmed Eruption		3	?		2007		9		30		Historical Observations		2008		6	?	16	15	15.55	41.83			2007	2008	2	2011	2011	1
241100	Ruapehu	14669	Confirmed Eruption		1			2007		9		25		Historical Observations		2007		9		25		-39.28	175.57			2007	2007	1	2011	2011	1
261170	Kerinci	15531	Confirmed Eruption		1			2007		9		9		Historical Observations		2007		9		9		-1.697	101.264			2007	2007	1	2011	2011	1
252080	Witori	15029	Confirmed Eruption	Pago	1	?		2007		8		28		Historical Observations		2007		8		28		-5.576	150.516			2007	2007	1	2010	2010	1
268060	Gamalama	16676	Uncertain Eruption		1	?		2007		8		23										0.8	127.33			2007		0	2010	2010	1
290360	Chikurachki	18859	Confirmed Eruption		2			2007		8		19		Historical Observations		2007		11		1	7	50.324	155.461			2007	2007	1	2010	2010	1
312030	Pavlof	20153	Confirmed Eruption		2			2007		8		15		Historical Observations		2007		9		13		55.417	-161.894			2007	2007	1	2010	2010	1
221115	Manda Hararo	13943	Confirmed Eruption		2			2007		8		12		Historical Observations		2007		8	?	14		12.17	40.82			2007	2007	1	2010	2010	1
263340	Raung	16165	Confirmed Eruption		2			2007		7		26		Historical Observations		2007		8		26		-8.119	114.056			2007	2007	1	2010	2010	1
268040	Gamkonora	16595	Confirmed Eruption		2			2007		7		8		Historical Observations		2007		7	?	16		1.38	127.53			2007	2007	1	2010	2010	1
311240	Cleveland	19825	Confirmed Eruption		2	?		2007		6	?	17		Historical Observations		2008		8	?	12		52.825	-169.944			2007	2008	2	2010	2010	1
266030	Soputan	16438	Confirmed Eruption		3			2007		6	?	16	15	Historical Observations		2007		11	?	9		1.112	124.737			2007	2007	1	2010	2010	1
222120	Lengai, Ol Doinyo	13828	Confirmed Eruption	North Crater	3			2007		6		16	15	Historical Observations		2010		10	?	9	1	-2.764	35.914			2007	2010	4	2010	2010	1
344040	Telica	10941	Uncertain Eruption		1			2007		6		12				2007		6		12		12.606	-86.84			2007	2007	1	2010	2010	1
357110	Llaima	12076	Confirmed Eruption		2			2007		5		26		Historical Observations		2007		8	?	8		-38.692	-71.729			2007	2007	1	2010	2010	1
251070	Ritter Island	14977	Confirmed Eruption		1	?		2007		5		19		Historical Observations		2007		5	?	21		-5.519	148.115			2007	2007	1	2010	2010	1
300250	Bezymianny	19385	Confirmed Eruption		3	?		2007		5	?	10		Historical Observations		2007		12	?	24		55.972	160.595			2007	2007	1	2010	2010	1
252120	Ulawun	15075	Confirmed Eruption		2			2007		5		1		Historical Observations		2007		5		1		-5.05	151.33			2007	2007	1	2010	2010	1
257050	Lopevi	15322	Confirmed Eruption		2			2007		4		21		Historical Observations		2007		5	?	14		-16.507	168.346			2007	2007	1	2010	2010	1
255060	Kavachi	15180	Confirmed Eruption		1			2007		4	?	2		Historical Observations		2007		4	>	6		-8.991	157.979			2007	2007	1	2010	2010	1
283040	Ontakesan	20962	Confirmed Eruption	1979 Crater #7	0			2007		3		24	7	Historical Observations								35.893	137.48			2007		0	2010	2010	1
211060	Etna	13849	Confirmed Eruption	Bocca Nuova, SE Crater and flank vents	2			2007		3		19		Historical Observations		2008		5	?	16	15	37.748	14.999			2007	2008	2	2010	2010	1
261160	Talang	15498	Confirmed Eruption	Main crater	2			2007		3		19		Historical Observations		2007		6		22	3	-0.979	100.681			2007	2007	1	2010	2010	1
352010	Reventador	11448	Confirmed Eruption		2			2007		3		15	7	Historical Observations		2007		10	?	11		-0.077	-77.656			2007	2007	1	2010	2010	1
290360	Chikurachki	18858	Confirmed Eruption		2			2007		3		4		Historical Observations		2007		4		18		50.324	155.461			2007	2007	1	2010	2010	1
351050	Huila, Nevado del	11312	Confirmed Eruption		3	?		2007		2		19		Historical Observations		2007		5	?	28		2.93	-76.03			2007	2007	1	2010	2010	1
300260	Klyuchevskoy	19483	Confirmed Eruption		2			2007		2		15		Historical Observations		2007		7		15		56.056	160.642			2007	2007	1	2010	2010	1
344120	Concepcion	11075	Confirmed Eruption		1			2007		2		9		Historical Observations		2007		7		10		11.538	-85.622			2007	2007	1	2010	2010	1
264260	Tara, Batu	16353	Confirmed Eruption		2			2007		1	?	17		Historical Observations		2015		11		26		-7.791	123.585			2007	2015	9	2010	2010	1
233010	Karthala	14208	Confirmed Eruption	Chahalé crater	2			2007		1		12		Historical Observations		2007		1	?	15		-11.75	43.38			2007	2007	1	2010	2010	1
266030	Soputan	16434	Confirmed Eruption		1			2006		12		14		Historical Observations		2006		12	?	26		1.112	124.737			2006	2006	1	2009	2009	1
242050	Monowai	14722	Confirmed Eruption		0			2006		12		12		Hydrophonic		2007		11		4	3	-25.887	-177.188			2006	2007	2	2009	2009	1
344040	Telica	10940	Confirmed Eruption		1			2006		12	?	11		Historical Observations		2007		2		17		12.606	-86.84			2006	2007	2	2009	2009	1
284170	Pagan	18522	Confirmed Eruption	North Pagan	1			2006		12		4		Historical Observations		2006		12		8		18.13	145.8			2006	2006	1	2009	2009	1
223020	Nyamulagira	14084	Confirmed Eruption	South flank	2			2006		11		27		Historical Observations		2006		12	?	5		-1.408	29.2			2006	2006	1	2009	2009	1
311161	Korovin	19768	Confirmed Eruption		1			2006		11		25	5	Historical Observations		2007		3	<	3		52.381	-174.166			2006	2007	2	2009	2009	1
257040	Ambrym	15296	Confirmed Eruption	Marum (Mbwelesu)	2			2006		11		8		Historical Observations		2007		12	>	27		-16.25	168.12			2006	2007	2	2009	2009	1
251070	Ritter Island	14976	Confirmed Eruption		1	?		2006		10		17		Historical Observations		2006		10	?	17		-5.519	148.115			2006	2006	1	2009	2009	1
273010	Bulusan	16771	Confirmed Eruption		2			2006		10		10		Historical Observations		2007		10		4		12.769	124.056			2006	2007	2	2009	2009	1
241100	Ruapehu	14668	Confirmed Eruption		1			2006		10		4		Historical Observations		2006		10		4		-39.28	175.57			2006	2006	1	2009	2009	1
261230	Dempo	15574	Confirmed Eruption		1			2006		9		25		Historical Observations		2006		9		25		-4.016	103.121			2006	2006	1	2009	2009	1
345040	Poas	11190	Confirmed Eruption		1			2006		9		25		Historical Observations		2006		12		16		10.2	-84.233			2006	2006	1	2009	2009	1
312260	Fourpeaked	20250	Confirmed Eruption	Fissure trending N from summit	2			2006		9		17		Historical Observations		2006		9		17		58.77	-153.672			2006	2006	1	2009	2009	1
261160	Talang	15497	Confirmed Eruption		1			2006		9		10		Historical Observations		2006		9		10		-0.979	100.681			2006	2006	1	2009	2009	1
344120	Concepcion	11074	Confirmed Eruption		2			2006		9		1		Historical Observations		2006		9		21		11.538	-85.622			2006	2006	1	2009	2009	1
284040	Miyakejima	18278	Confirmed Eruption		1			2006		8		23		Historical Observations		2006		8		23		34.094	139.526			2006	2006	1	2009	2009	1
252140	Rabaul	15100	Confirmed Eruption	Tavurvur	4	?		2006		8		11		Historical Observations		2010		1		31		-4.271	152.203			2006	2010	5	2009	2009	1
252010	Langila	15002	Confirmed Eruption		2			2006		8		9		Historical Observations		2008		7	?	6		-5.525	148.42			2006	2008	3	2009	2009	1
243080	Home Reef	14771	Confirmed Eruption		2	?		2006		8		7		Historical Observations		2006		8	?	16		-18.992	-174.775			2006	2006	1	2009	2009	1
344040	Telica	10939	Confirmed Eruption		1			2006		8		4		Historical Observations		2006		8		6		12.606	-86.84			2006	2006	1	2009	2009	1
344100	Masaya	11041	Confirmed Eruption	Santiago	1			2006		8		4		Historical Observations		2006		10	?	25		11.985	-86.165			2006	2006	1	2009	2009	1
233020	Fournaise, Piton de la	14389	Confirmed Eruption	Dolomieu, S, E, and SE flanks	1	?		2006		7		20		Historical Observations		2007		5		1		-21.244	55.708			2006	2007	2	2009	2009	1
211060	Etna	13848	Confirmed Eruption	SE Crater & flank vents; NE Crater	2			2006		7		14		Historical Observations		2006		12		15		37.748	14.999			2006	2006	1	2009	2009	1
273030	Mayon	16817	Confirmed Eruption		1			2006		7		13		Historical Observations		2006		10		1		13.257	123.685			2006	2006	1	2009	2009	1
267020	Karangetang	16541	Confirmed Eruption		1			2006		7		3		Historical Observations		2007		10	>	16	15	2.781	125.407			2006	2007	2	2009	2009	1
264260	Tara, Batu	16352	Uncertain Eruption		1	?		2006		7		1				2006		7		1		-7.791	123.585			2006	2006	1	2009	2009	1
272020	Kanlaon	16638	Confirmed Eruption		2			2006		6		3		Historical Observations		2006		7		25		10.412	123.132			2006	2006	1	2009	2009	1
233010	Karthala	14207	Confirmed Eruption	Chahalé crater	0			2006		5		28		Historical Observations		2006		6	?	3		-11.75	43.38			2006	2006	1	2008	2008	1
355100	Lascar	11878	Confirmed Eruption		3			2006		4		18		Historical Observations		2007		7	?	18		-23.37	-67.73			2006	2007	2	2008	2008	1
373030	Bardarbunga	12895	Uncertain Eruption	Loki-Fögrufjöll (East Loki cauldron)	0			2006		4		16	15									64.633	-17.516			2006		0	2008	2008	1
300250	Bezymianny	19384	Confirmed Eruption		3			2006		4	<	16	15	Historical Observations		2006		12	?	29		55.972	160.595			2006	2006	1	2008	2008	1
354020	Ubinas	11791	Confirmed Eruption		2			2006		3	?	25		Historical Observations		2009		7	?	4		-16.355	-70.903			2006	2009	4	2008	2008	1
345040	Poas	11189	Confirmed Eruption		1			2006		3		24		Historical Observations		2006		3	?	24		10.2	-84.233			2006	2006	1	2008	2008	1
285070	Akan	18704	Confirmed Eruption	NE flank of Me-Akan	1			2006		3		21		Historical Observations		2006		3		21		43.384	144.013			2006	2006	1	2008	2008	1
273010	Bulusan	16770	Confirmed Eruption		2			2006		3		21		Historical Observations		2006		6		28		12.769	124.056			2006	2006	1	2008	2008	1
284200	Anatahan	18537	Confirmed Eruption	East Crater	2			2006		3	?	20		Historical Observations		2006		6	?	26		16.35	145.67			2006	2006	1	2008	2008	1
242030	Raoul Island	14702	Confirmed Eruption	Green Lake crater	1	?		2006		3		17		Historical Observations		2006		3		17		-29.27	-177.92			2006	2006	1	2008	2008	1
263250	Merapi	15923	Confirmed Eruption		1			2006		3		16	15	Historical Observations		2007		8	?	9		-7.54	110.446			2006	2007	2	2008	2008	1
234010	Heard	14412	Confirmed Eruption	Mawson Peak	0			2006		3		11		Historical Observations		2008		3		3		-53.106	73.513			2006	2008	3	2008	2008	1
342110	Pacaya	22213	Confirmed Eruption	MacKenney Cone	3			2006		3		9		Historical Observations		2010		10		26		14.382	-90.601			2006	2010	5	2008	2008	1
312070	Veniaminof	20177	Confirmed Eruption	Western intracaldera cone	1			2006		3		3		Historical Observations		2006		9		7		56.17	-159.38			2006	2006	1	2008	2008	1
252120	Ulawun	15074	Confirmed Eruption		2			2006		3		1		Historical Observations		2007		1		18		-5.05	151.33			2006	2007	2	2008	2008	1
273030	Mayon	16816	Confirmed Eruption		1			2006		2		21		Historical Observations		2006		2		23		13.257	123.685			2006	2006	1	2008	2008	1
284040	Miyakejima	18277	Confirmed Eruption		1			2006		2		17		Historical Observations		2006		2		17		34.094	139.526			2006	2006	1	2008	2008	1
256010	Tinakula	15209	Confirmed Eruption		2			2006		2		11		Historical Observations		2007		11	?	9		-10.386	165.804			2006	2007	2	2008	2008	1
311240	Cleveland	19818	Confirmed Eruption		3			2006		2		6		Historical Observations		2006		10		28		52.825	-169.944			2006	2006	1	2008	2008	1
266030	Soputan	16433	Confirmed Eruption		1			2005		12		26		Historical Observations		2006		1	?	24		1.112	124.737			2005	2006	2	2008	2008	1
266020	Ambang	20947	Confirmed Eruption		1			2005		12		22		Historical Observations								0.75	124.42			2005		0	2008	2008	1
211060	Etna	13847	Confirmed Eruption	Bocca Nuova	1			2005		12		16		Historical Observations		2005		12		22		37.748	14.999			2005	2005	1	2008	2008	1
313010	Augustine	20273	Confirmed Eruption		3			2005		12	?	9		Historical Observations		2006		4	?	27		59.363	-153.43			2005	2006	2	2008	2008	1
300250	Bezymianny	19383	Confirmed Eruption		2			2005		11	?	29		Historical Observations		2005		12	>	1		55.972	160.595			2005	2005	1	2008	2008	1
257030	Ambae	15237	Confirmed Eruption	Lake Voui	2			2005		11		27		Historical Observations		2006		2		16	15	-15.389	167.835			2005	2006	2	2008	2008	1
233010	Karthala	14206	Confirmed Eruption	Chahalé crater	3			2005		11		24		Historical Observations		2005		12		8		-11.75	43.38			2005	2005	1	2008	2008	1
351080	Galeras	11378	Confirmed Eruption		2			2005		11		24		Historical Observations		2006		7		12		1.22	-77.37			2005	2006	2	2008	2008	1
344020	San Cristobal	10892	Confirmed Eruption		2			2005		11		13		Historical Observations		2006		5		27		12.702	-87.004			2005	2006	2	2008	2008	1
257050	Lopevi	15321	Confirmed Eruption		2			2005		10	?	27		Historical Observations		2006		8	?	1		-16.507	168.346			2005	2006	2	2008	2008	1
353050	Negra, Sierra	11713	Confirmed Eruption	North caldera rim	3			2005		10		22		Historical Observations		2005		10		30		-0.83	-91.17			2005	2005	1	2008	2008	1
252070	Krummel-Garbuna-Welcker	15007	Confirmed Eruption	Central part of Garbuna complex	2			2005		10		16		Historical Observations		2005		11	>	17		-5.416	150.027			2005	2005	1	2008	2008	1
233020	Fournaise, Piton de la	14388	Confirmed Eruption	Dolomieu, N and NE flanks	0			2005		10		4		Historical Observations		2006		1		18		-21.244	55.708			2005	2006	2	2008	2008	1
221113	Dabbahu	13942	Confirmed Eruption	NE flank (Da'Ure)	3	?		2005		9		26		Historical Observations		2005		9		29		12.595	40.48			2005	2005	1	2007	2007	1
284130	Fukutoku-Oka-no-Ba	18468	Uncertain Eruption		0			2005		9		11				2007		2	>	16	15	24.285	141.481			2005	2007	3	2007	2007	1
312070	Veniaminof	20176	Confirmed Eruption	Western intracaldera cone	1			2005		9		7		Historical Observations		2005		11	?	4		56.17	-159.38			2005	2005	1	2007	2007	1
273030	Mayon	16815	Confirmed Eruption		0			2005		8	<	17		Historical Observations								13.257	123.685			2005		0	2007	2007	1
334050	Northern EPR at 9.8°N	10346	Confirmed Eruption	East Pacific Rise (9.8 deg N)	0			2005		8	?	16	15	Historical Observations		2006		1	?	16	15	9.83	-104.3			2005	2006	2	2007	2007	1
344120	Concepcion	11073	Confirmed Eruption		2			2005		7		28		Historical Observations		2005		11		10		11.538	-85.622			2005	2005	1	2007	2007	1
263340	Raung	16164	Uncertain Eruption		2	?		2005		7	?	23				2005		8	?	15		-8.119	114.056			2005	2005	1	2007	2007	1
373030	Bardarbunga	12894	Uncertain Eruption	Loki-Fögrufjöll (West Loki cauldron)	0			2005		7		16	15			2005		8		16	15	64.633	-17.516			2005	2005	1	2007	2007	1
234011	McDonald Islands	14399	Confirmed Eruption		0			2005		7	<	12		Historical Observations								-53.03	72.6			2005		0	2007	2007	1
284130	Fukutoku-Oka-no-Ba	18467	Confirmed Eruption		1			2005		7		2		Historical Observations		2005		7	?	21		24.285	141.481			2005	2005	1	2007	2007	1
290120	Kolokol Group	18775	Uncertain Eruption	Berg	1	?		2005		7		2	182									46.042	150.083			2005		0	2007	2007	1
343020	Santa Ana	10768	Confirmed Eruption		3			2005		6		16		Historical Observations		2005		10	?	1		13.853	-89.63			2005	2005	1	2007	2007	1
260010	Barren Island	15386	Confirmed Eruption	Central cone summit, N, S, and SW flanks	2			2005		5		26		Historical Observations		2007		12	?	23		12.278	93.858			2005	2007	3	2007	2007	1
353010	Fernandina	11676	Confirmed Eruption	South caldera rim	2			2005		5		13		Historical Observations		2005		5	?	29		-0.37	-91.55			2005	2005	1	2007	2007	1
355100	Lascar	11877	Confirmed Eruption		3	?		2005		5		4		Historical Observations		2005		5		4		-23.37	-67.73			2005	2005	1	2007	2007	1
252010	Langila	15001	Confirmed Eruption		2			2005		4	?	19		Historical Observations		2006		3	?	31		-5.525	148.42			2005	2006	2	2007	2007	1
266030	Soputan	16437	Confirmed Eruption		2			2005		4		19		Historical Observations		2005		7	?	18		1.112	124.737			2005	2005	1	2007	2007	1
233010	Karthala	14205	Confirmed Eruption	Chahalé crater	2	?		2005		4		16		Historical Observations		2005		4		18		-11.75	43.38			2005	2005	1	2007	2007	1
360050	Soufriere Hills	12348	Confirmed Eruption		3	?		2005		4		15		Historical Observations		2013		2		5		16.72	-62.18			2005	2013	9	2007	2007	1
282110	Asosan	17350	Confirmed Eruption	Naka-dake	1			2005		4		14		Historical Observations		2005		8		16	15	32.884	131.104			2005	2005	1	2007	2007	1
284040	Miyakejima	18276	Confirmed Eruption		1			2005		4		12		Historical Observations		2005		5		18		34.094	139.526			2005	2005	1	2007	2007	1
261160	Talang	15496	Confirmed Eruption	North & south flanks	2			2005		4	?	12		Historical Observations		2005		7	?	18		-0.979	100.681			2005	2005	1	2007	2007	1
252120	Ulawun	15073	Confirmed Eruption		2			2005		3	?	27		Historical Observations		2005		8	?	9		-5.05	151.33			2005	2005	1	2007	2007	1
311240	Cleveland	19817	Confirmed Eruption		2			2005		3	?	13		Historical Observations		2005		11		27	1	52.825	-169.944			2005	2005	1	2007	2007	1
290360	Chikurachki	18857	Confirmed Eruption		1			2005		3		12		Historical Observations		2005		4		7		50.324	155.461			2005	2005	1	2007	2007	1
284080	Sumisujima	18356	Uncertain Eruption		0			2005		3		8				2005		3		8		31.44	140.051			2005	2005	1	2006	2006	1
344100	Masaya	11040	Confirmed Eruption	Santiago	1			2005		3	?	4		Historical Observations		2005		3	?	30		11.985	-86.165			2005	2005	1	2006	2006	1
242050	Monowai	14721	Confirmed Eruption		0			2005		3		2		Hydrophonic		2006		6		27		-25.887	-177.188			2005	2006	2	2006	2006	1
311161	Korovin	19767	Confirmed Eruption		1			2005		2		23		Historical Observations		2005		5		5	4	52.381	-174.166			2005	2005	1	2006	2006	1
233020	Fournaise, Piton de la	14386	Confirmed Eruption	North side of caldera (1600, 1200, & 450 m)	0			2005		2		17		Historical Observations		2005		2		26		-21.244	55.708			2005	2005	1	2006	2006	1
264160	Egon	16277	Confirmed Eruption	Summit and southern flank	1			2005		2		6		Historical Observations		2005		2		27		-8.676	122.455			2005	2005	1	2006	2006	1
257050	Lopevi	15320	Confirmed Eruption		2			2005		1		30		Historical Observations		2005		3	?	31		-16.507	168.346			2005	2005	1	2006	2006	1
290380	Ebeko	18877	Confirmed Eruption		2			2005		1		29		Historical Observations		2005		2		16		50.686	156.014			2005	2005	1	2006	2006	1
252140	Rabaul	15099	Confirmed Eruption	Tavurvur	2			2005		1		25		Historical Observations		2006		2		17		-4.271	152.203			2005	2006	2	2006	2006	1
272020	Kanlaon	16749	Confirmed Eruption		2			2005		1		25		Historical Observations		2005		5		25		10.412	123.132			2005	2005	1	2006	2006	1
300260	Klyuchevskoy	19482	Confirmed Eruption		2			2005		1	<	20		Historical Observations		2005		4		7		56.056	160.642			2005	2005	1	2006	2006	1
341090	Popocatepetl	10556	Confirmed Eruption		2			2005		1		9		Historical Observations	>	2021		3		12		19.023	-98.622			2005	2021	17	2006	2006	1
312070	Veniaminof	20175	Confirmed Eruption	Western intracaldera cone	2			2005		1		4		Historical Observations		2005		2		14	3	56.17	-159.38			2005	2005	1	2006	2006	1
344020	San Cristobal	10891	Confirmed Eruption		1			2004		12		3		Historical Observations		2004		12		7		12.702	-87.004			2004	2004	1	2006	2006	1
284040	Miyakejima	18275	Confirmed Eruption		1			2004		11		30		Historical Observations		2004		12		9		34.094	139.526			2004	2004	1	2006	2006	1
252010	Langila	15000	Confirmed Eruption		2	?		2004		11	?	24		Historical Observations		2004		12	?	25		-5.525	148.42			2004	2004	1	2006	2006	1
234011	McDonald Islands	14398	Uncertain Eruption		1	?		2004		11		14				2004		11		14		-53.03	72.6			2004	2004	1	2006	2006	1
352010	Reventador	11447	Confirmed Eruption		2			2004		11		7	3	Historical Observations		2006		3		16	15	-0.077	-77.656			2004	2006	3	2006	2006	1
344040	Telica	10938	Confirmed Eruption		1			2004		11		5		Historical Observations		2005		1		29		12.606	-86.84			2004	2005	2	2006	2006	1
373010	Grimsvotn	12842	Confirmed Eruption	SW and east sides of caldera	3			2004		11		1		Historical Observations		2004		11		4		64.416	-17.316			2004	2004	1	2006	2006	1
251020	Manam	14934	Confirmed Eruption	South Crater, Main Crater	4	?		2004		10		24		Historical Observations		2009		12	?	12		-4.08	145.037			2004	2009	6	2006	2006	1
282030	Suwanosejima	16947	Confirmed Eruption	O-take	2			2004		10		23		Historical Observations	>	2021		3		12		29.638	129.714			2004	2021	18	2006	2006	1
266030	Soputan	16436	Confirmed Eruption		3	?		2004		10		18		Historical Observations		2004		12	?	27		1.112	124.737			2004	2004	1	2006	2006	1
264030	Rinjani	16226	Confirmed Eruption	Summit and NE flank of Barujari	2			2004		10		1		Historical Observations		2004		10	>	5		-8.42	116.47			2004	2004	1	2006	2006	1
321050	St. Helens	20560	Confirmed Eruption	South of 1980-1986 lava dome	2			2004		10		1		Historical Observations		2008		1		27	10	46.2	-122.18			2004	2008	5	2006	2006	1
257050	Lopevi	15319	Confirmed Eruption		2			2004		9		16	15	Historical Observations		2004		9		16	15	-16.507	168.346			2004	2004	1	2006	2006	1
300260	Klyuchevskoy	19481	Confirmed Eruption		1			2004		9		15		Historical Observations		2004		9		15		56.056	160.642			2004	2004	1	2006	2006	1
211060	Etna	13846	Confirmed Eruption	SE Crater, SE flank (3000-2320 m)	1			2004		9		7		Historical Observations		2005		3		8		37.748	14.999			2004	2005	2	2006	2006	1
283110	Asamayama	17810	Confirmed Eruption		2			2004		9		1		Historical Observations		2004		12		9		36.406	138.523			2004	2004	1	2006	2006	1
261140	Marapi	15479	Confirmed Eruption		2			2004		8		5		Historical Observations		2004		8	?	5		-0.38	100.474			2004	2004	1	2005	2005	1
357120	Villarrica	12181	Confirmed Eruption		1			2004		8	?	5		Historical Observations		2007		12	?	24		-39.42	-71.93			2004	2007	4	2005	2005	1
386011	Nightingale Island	13145	Confirmed Eruption	Submarine SE flank	0			2004		7		29		Historical Observations		2004		7		30		-37.42	-12.48			2004	2004	1	2005	2005	1
290260	Chirinkotan	18830	Confirmed Eruption		2			2004		7		20		Historical Observations		2004		7		20		48.98	153.48			2004	2004	1	2005	2005	1
342110	Pacaya	19887	Confirmed Eruption	MacKenney Cone and lower S flank	3	?		2004		7	?	19		Historical Observations		2005		9		11		14.382	-90.601			2004	2005	2	2005	2005	1
351080	Galeras	11377	Confirmed Eruption	El Pinta vent	3			2004		7		16		Historical Observations		2005		2	?	7		1.22	-77.37			2004	2005	2	2005	2005	1
344100	Masaya	11039	Uncertain Eruption	Santiago	1	?		2004		7		4				2004		7		4		11.985	-86.165			2004	2004	1	2005	2005	1
311161	Korovin	19766	Confirmed Eruption		1	?		2004		7	<	4		Historical Observations								52.381	-174.166			2004		0	2005	2005	1
264160	Egon	16276	Confirmed Eruption		2			2004		7		3		Historical Observations		2004		9	?	16		-8.676	122.455			2004	2004	1	2005	2005	1
234070	Marion Island	14414	Confirmed Eruption	South side of island	1			2004		6		24		Historical Observations		2004		6	?	24		-46.9	37.75			2004	2004	1	2005	2005	1
261170	Kerinci	15529	Confirmed Eruption		2			2004		6	?	22		Historical Observations		2004		10	?	24		-1.697	101.264			2004	2004	1	2005	2005	1
263310	Tengger Caldera	16063	Confirmed Eruption	Bromo	2			2004		6		8		Historical Observations		2004		6		24	3	-7.942	112.95			2004	2004	1	2005	2005	1
284120	Ioto	18422	Uncertain Eruption	Asodai area	1			2004		6		6				2004		6		8		24.751	141.289			2004	2004	1	2005	2005	1
273030	Mayon	16814	Confirmed Eruption		1			2004		6		3		Historical Observations		2004		9	?	12		13.257	123.685			2004	2004	1	2005	2005	1
267040	Awu	16570	Confirmed Eruption		2			2004		6	<	2		Historical Observations		2004		8	?	16	15	3.689	125.447			2004	2004	1	2005	2005	1
341090	Popocatepetl	10552	Confirmed Eruption		2			2004		5		26		Historical Observations		2004		5		26		19.023	-98.622			2004	2004	1	2005	2005	1
268030	Ibu	16581	Confirmed Eruption		0	?		2004		5	?	16	15	Historical Observations		2005		2	?	22		1.488	127.63			2004	2005	2	2005	2005	1
223020	Nyamulagira	14083	Confirmed Eruption	Summit and NNW flank	2	?		2004		5		8		Historical Observations		2004		5		28	3	-1.408	29.2			2004	2004	1	2005	2005	1
233020	Fournaise, Piton de la	14385	Confirmed Eruption	SSW of Bory, Dolomieu and east flank	0			2004		5		2		Historical Observations		2004		10		16		-21.244	55.708			2004	2004	1	2005	2005	1
263340	Raung	16163	Uncertain Eruption		2	?		2004		4	?	15				2004		10	?	8		-8.119	114.056			2004	2004	1	2005	2005	1
252120	Ulawun	15072	Confirmed Eruption		2			2004		4		12		Historical Observations		2004		4		14		-5.05	151.33			2004	2004	1	2005	2005	1
284200	Anatahan	18536	Confirmed Eruption	East Crater	3	?		2004		4	<	12		Historical Observations		2005		9	?	3		16.35	145.67			2004	2005	2	2005	2005	1
267020	Karangetang	16540	Confirmed Eruption		2			2004		4	?	2		Historical Observations		2005		8	?	5		2.781	125.407			2004	2005	2	2005	2005	1
344040	Telica	10937	Confirmed Eruption		1			2004		3		31		Historical Observations		2004		3		31		12.606	-86.84			2004	2004	1	2005	2005	1
243060	Tofua	14752	Confirmed Eruption	Lofia crater	1	?		2004		3		19		Historical Observations		2014		10		18		-19.75	-175.07			2004	2014	11	2005	2005	1
255060	Kavachi	15179	Confirmed Eruption		1			2004		3		15		Historical Observations								-8.991	157.979			2004		0	2005	2005	1
282060	Kikai	17003	Confirmed Eruption	Iwo-dake	2			2004		3		5		Historical Observations		2004		10		16	15	30.793	130.305			2004	2004	1	2005	2005	1
360050	Soufriere Hills	12347	Confirmed Eruption		3	?		2004		3		3		Historical Observations		2004		5		2		16.72	-62.18			2004	2004	1	2005	2005	1
285050	Tokachidake	18661	Confirmed Eruption	1962-II Crater	1	?		2004		2		25		Historical Observations		2004		4		19		43.418	142.686			2004	2004	1	2005	2005	1
252080	Witori	15028	Uncertain Eruption	Pago	1	?		2004		2		24				2004		2		24		-5.576	150.516			2004	2004	1	2005	2005	1
311360	Shishaldin	20100	Confirmed Eruption		2			2004		2		17		Historical Observations		2004		7	>	16	15	54.756	-163.97			2004	2004	1	2005	2005	1
312070	Veniaminof	20174	Confirmed Eruption	Western intracaldera cone	2			2004		2		16		Historical Observations		2004		9		5	4	56.17	-159.38			2004	2004	1	2005	2005	1
257060	Epi	15332	Confirmed Eruption	Epi B	2			2004		2		16		Historical Observations		2004		2		24		-16.68	168.37			2004	2004	1	2004	2004	1
211060	Etna	13838	Confirmed Eruption	Central Crater	1	?		2004		2		12		Historical Observations		2004		2		14		37.748	14.999			2004	2004	1	2004	2004	1
264160	Egon	16275	Confirmed Eruption		1			2004		1		29		Historical Observations		2004		2	?	5		-8.676	122.455			2004	2004	1	2004	2004	1
252010	Langila	14999	Confirmed Eruption		2	?		2004		1	?	20		Historical Observations		2004		1	?	27		-5.525	148.42			2004	2004	1	2004	2004	1
300250	Bezymianny	19382	Confirmed Eruption		3			2004		1		14		Historical Observations		2005		2	?	16	15	55.972	160.595			2004	2005	2	2004	2004	1
282110	Asosan	17349	Confirmed Eruption	Naka-dake	1			2004		1		14		Historical Observations		2004		1		14		32.884	131.104			2004	2004	1	2004	2004	1
355100	Lascar	11876	Uncertain Eruption		1			2003		12		9				2003		12		9		-23.37	-67.73			2003	2003	1	2004	2004	1
284080	Sumisujima	18355	Uncertain Eruption		0			2003		11		6				2003		11		6		31.44	140.051			2003	2003	1	2004	2004	1
284110	Kita-Ioto	18395	Uncertain Eruption	Funka-Asane	0			2003		11		4				2003		11		4		25.424	141.284			2003	2003	1	2004	2004	1
251020	Manam	14933	Confirmed Eruption	Main Crater	1			2003		10		26	5	Historical Observations		2004		3		28		-4.08	145.037			2003	2004	2	2004	2004	1
273030	Mayon	16813	Uncertain Eruption		0			2003		10		8				2003		10	?	11		13.257	123.685			2003	2003	1	2004	2004	1
344100	Masaya	11038	Confirmed Eruption	Santiago	1			2003		9	<	22		Historical Observations		2003		12	?	12		11.985	-86.165			2003	2003	1	2004	2004	1
266100	Lokon-Empung	16463	Confirmed Eruption	Tompaluan	3			2003		9		12		Historical Observations		2003		9		12		1.358	124.792			2003	2003	1	2004	2004	1
357070	Chillan, Nevados de	11992	Confirmed Eruption	Saddle between Nuevo & Arrau volcanoes	1			2003		8		29		Historical Observations		2003		9		15	5	-36.868	-71.378			2003	2003	1	2004	2004	1
268060	Gamalama	16675	Confirmed Eruption		2			2003		7		31		Historical Observations		2003		10		2	3	0.8	127.33			2003	2003	1	2004	2004	1
354006	Sabancaya	11752	Confirmed Eruption		2	?		2003		7		30	1	Historical Observations		2003		7	?	31		-15.787	-71.857			2003	2003	1	2004	2004	1
300250	Bezymianny	19381	Confirmed Eruption		3			2003		7		26		Historical Observations		2003		8	?	1		55.972	160.595			2003	2003	1	2004	2004	1
263200	Dieng Volcanic Complex	15791	Confirmed Eruption	Sileri Crater	1	?		2003		7		16	15	Historical Observations		2003		7		16	15	-7.2	109.879			2003	2003	1	2004	2004	1
282110	Asosan	17348	Confirmed Eruption	Naka-dake	1			2003		7		10		Historical Observations		2003		7		14		32.884	131.104			2003	2003	1	2004	2004	1
284211	NW Rota-1	18539	Confirmed Eruption	Upper South flank (Brimstone Pit)	0		?	2003		7		2	182	Historical Observations		2010		3	>	16	15	14.601	144.775			2003	2010	8	2004	2004	1
264200	Leroboleng	16308	Confirmed Eruption		3			2003		6		26		Historical Observations		2003		7		29		-8.365	122.833			2003	2003	1	2004	2004	1
344020	San Cristobal	10890	Confirmed Eruption		1	?		2003		6		17		Historical Observations		2004		6		13		12.702	-87.004			2003	2004	2	2004	2004	1
234010	Heard	14410	Confirmed Eruption	Mawson Peak	0			2003		6		9		Historical Observations		2004		6		14		-53.106	73.513			2003	2004	2	2004	2004	1
257050	Lopevi	15318	Confirmed Eruption		3			2003		6		8		Historical Observations		2003		6	?	16		-16.507	168.346			2003	2003	1	2004	2004	1
334040	Northern EPR at 10.7°N	10326	Confirmed Eruption		0			2003		5	?	31	30	Historical Observations		2003		10		15	21	10.73	-103.58			2003	2003	1	2004	2004	1
233020	Fournaise, Piton de la	14384	Confirmed Eruption	Dolomieu, Bory, N, NW, and SSW flanks	1			2003		5		30		Historical Observations		2004		1		10		-21.244	55.708			2003	2004	2	2004	2004	1
264180	Lewotobi	16304	Confirmed Eruption	Lewotobi Lakilaki	2			2003		5		30		Historical Observations		2003		9	>	1		-8.542	122.775			2003	2003	1	2004	2004	1
357120	Villarrica	12180	Confirmed Eruption		1			2003		5	?	23		Historical Observations		2004		3	?	25		-39.42	-71.93			2003	2004	2	2004	2004	1
251020	Manam	14932	Confirmed Eruption	Main Crater	1			2003		5		17		Historical Observations		2003		5		23		-4.08	145.037			2003	2003	1	2004	2004	1
284200	Anatahan	18535	Confirmed Eruption	East Crater	3			2003		5		10		Historical Observations		2003		7		12	3	16.35	145.67			2003	2003	1	2004	2004	1
290360	Chikurachki	18856	Confirmed Eruption		2			2003		4		17		Historical Observations		2003		7	?	3		50.324	155.461			2003	2003	1	2004	2004	1
352020	Guagua Pichincha	11500	Uncertain Eruption		1			2003		4	<	17				2003		4		17		-0.171	-78.598			2003	2003	1	2004	2004	1
244000	Vailulu'u	14803	Confirmed Eruption	West side of caldera (Nafanua)	0			2003	2	4		16	15	Historical Observations								-14.215	-169.058			2003		0	2004	2004	1
252120	Ulawun	15071	Confirmed Eruption		2			2003		4	?	14		Historical Observations		2003		10		10		-5.05	151.33			2003	2003	1	2004	2004	1
242050	Monowai	14720	Confirmed Eruption		0			2003		4		10		Hydrophonic		2004		9		16	15	-25.887	-177.188			2003	2004	2	2004	2004	1
357110	Llaima	12075	Confirmed Eruption		2			2003		4		9		Historical Observations		2003		4	>	16		-38.692	-71.729			2003	2003	1	2004	2004	1
273030	Mayon	16812	Confirmed Eruption		2			2003		3		17		Historical Observations		2003		5		14		13.257	123.685			2003	2003	1	2004	2004	1
284110	Kita-Ioto	18394	Uncertain Eruption	Funka-Asane	0			2003		3		10				2003		3		10		25.424	141.284			2003	2003	1	2004	2004	1
211060	Etna	13837	Confirmed Eruption	NE Crater	1			2003		3		8	3	Historical Observations		2003		11		9		37.748	14.999			2003	2003	1	2003	2003	1
272020	Kanlaon	16748	Confirmed Eruption		1			2003		3		7		Historical Observations		2003		7		23		10.412	123.132			2003	2003	1	2003	2003	1
282060	Kikai	17002	Confirmed Eruption	Iwo-dake	2			2003		2	?	16	15	Historical Observations		2003		10		16	15	30.793	130.305			2003	2003	1	2003	2003	1
283110	Asamayama	17809	Confirmed Eruption		1			2003		2		6		Historical Observations		2003		4		18		36.406	138.523			2003	2003	1	2003	2003	1
300250	Bezymianny	19380	Confirmed Eruption		2			2002		12		25		Historical Observations		2002		12	?	28		55.972	160.595			2002	2002	1	2003	2003	1
266100	Lokon-Empung	16462	Confirmed Eruption	Tompaluan	2			2002		12		23		Historical Observations		2003		4		1		1.358	124.792			2002	2003	2	2003	2003	1
284130	Fukutoku-Oka-no-Ba	18466	Uncertain Eruption		0			2002		12		19				2003		3		11		24.285	141.481			2002	2003	2	2003	2003	1
272020	Kanlaon	16747	Confirmed Eruption		1			2002		11		28		Historical Observations		2002		11		28		10.412	123.132			2002	2002	1	2003	2003	1
300260	Klyuchevskoy	19480	Confirmed Eruption		2			2002		11		24		Historical Observations		2004		4		8		56.056	160.642			2002	2004	3	2003	2003	1
233020	Fournaise, Piton de la	14383	Confirmed Eruption	East flank of Dolomieu (1850-1540 m)	2			2002		11		16		Historical Observations		2002		12		3		-21.244	55.708			2002	2002	1	2003	2003	1
256010	Tinakula	15208	Uncertain Eruption		1	?		2002		11		16	15									-10.386	165.804			2002		0	2003	2003	1
263100	Papandayan	15688	Confirmed Eruption	Kawah Baru, Kawah Nangklak	2			2002		11		11		Historical Observations		2002		12		19	3	-7.32	107.73			2002	2002	1	2003	2003	1
352010	Reventador	11446	Confirmed Eruption	Summit and SE flank (2600 m)	4			2002		11		3		Historical Observations		2003		1	?	10		-0.077	-77.656			2002	2003	2	2003	2003	1
242050	Monowai	14719	Confirmed Eruption		0			2002		11		1		Hydrophonic		2002		11		24		-25.887	-177.188			2002	2002	1	2003	2003	1
251020	Manam	14931	Confirmed Eruption		2			2002		10		31		Historical Observations								-4.08	145.037			2002		0	2003	2003	1
211060	Etna	13836	Confirmed Eruption	NE Rift (3100-1900 m), S flank (2850-2600 m)	3			2002		10		26		Historical Observations		2003		1		28		37.748	14.999			2002	2003	2	2003	2003	1
355100	Lascar	11875	Confirmed Eruption		2			2002		10		26		Historical Observations		2002		10		27		-23.37	-67.73			2002	2002	1	2003	2003	1
344040	Telica	10936	Confirmed Eruption		0			2002		10		17		Historical Observations								12.606	-86.84			2002		0	2003	2003	1
357110	Llaima	12074	Confirmed Eruption		1			2002		10		13	12	Historical Observations								-38.692	-71.729			2002		0	2003	2003	1
264180	Lewotobi	16300	Confirmed Eruption	Lewotobi Lakilaki	1			2002		10		12		Historical Observations		2002		10	?	12		-8.542	122.775			2002	2002	1	2003	2003	1
273030	Mayon	16811	Confirmed Eruption		1			2002		10		11		Historical Observations		2002		10		11		13.257	123.685			2002	2002	1	2003	2003	1
352020	Guagua Pichincha	11499	Confirmed Eruption		1	?		2002		10		11		Historical Observations		2002		12		7		-0.171	-78.598			2002	2002	1	2003	2003	1
252140	Rabaul	15098	Confirmed Eruption	Tavurvur	2			2002		10	?	6		Historical Observations		2004		2		17		-4.271	152.203			2002	2004	3	2003	2003	1
267010	Ruang	16493	Confirmed Eruption		4	?		2002		9		25		Historical Observations		2002		9	?	29		2.3	125.37			2002	2002	1	2003	2003	1
312070	Veniaminof	20173	Confirmed Eruption	Western intracaldera cone	1			2002		9		24		Historical Observations		2003		3		23		56.17	-159.38			2002	2003	2	2003	2003	1
284080	Sumisujima	18354	Uncertain Eruption		0			2002		9		4				2002		9		4		31.44	140.051			2002	2002	1	2003	2003	1
252120	Ulawun	15066	Confirmed Eruption		2			2002		8	?	22		Historical Observations		2002		11		3		-5.05	151.33			2002	2002	1	2003	2003	1
284090	Izu-Torishima	18372	Confirmed Eruption	Iwo-yama	2			2002		8		12		Historical Observations		2002		8		20		30.484	140.303			2002	2002	1	2003	2003	1
252080	Witori	15027	Confirmed Eruption	Pago (summit and NW flank)	3			2002		8		3		Historical Observations		2003		3		26	25	-5.576	150.516			2002	2003	2	2002	2002	1
251070	Ritter Island	14975	Uncertain Eruption		2	?		2002		8		2				2002		8		2		-5.519	148.115			2002	2002	1	2002	2002	1
315020	Wrangell	20420	Uncertain Eruption		1			2002		8		1		Historical Observations		2002		8		2		62.006	-144.017			2002	2002	1	2002	2002	1
263350	Ijen	16178	Uncertain Eruption	Kawah Ijen	1			2002		7		29				2002		8		15	3	-8.058	114.242			2002	2002	1	2002	2002	1
223020	Nyamulagira	14082	Confirmed Eruption	Summit caldera, north & south flanks	2	?		2002		7		25		Historical Observations		2002		9	?	16	15	-1.408	29.2			2002	2002	1	2002	2002	1
311161	Korovin	19765	Confirmed Eruption		1	?		2002		7	<	16	15	Historical Observations								52.381	-174.166			2002		0	2002	2002	1
373030	Bardarbunga	12893	Uncertain Eruption	Loki-Fögrufjöll (W and E Loki cauldrons)	0			2002		7		16	15			2002		9		16	15	64.633	-17.516			2002	2002	1	2002	2002	1
263340	Raung	16162	Confirmed Eruption		2			2002		6	<	16	15	Historical Observations		2002		8	>	25		-8.119	114.056			2002	2002	1	2002	2002	1
351080	Galeras	11376	Confirmed Eruption	El Pinta vent	1	?		2002		6		7		Historical Observations		2002		6	?	7		1.22	-77.37			2002	2002	1	2002	2002	1
342110	Pacaya	19886	Confirmed Eruption	MacKenney Crater	1	?		2002		5		30		Historical Observations		2002		6	?	17		14.382	-90.601			2002	2002	1	2002	2002	1
344020	San Cristobal	10889	Confirmed Eruption		1			2002		5		29		Historical Observations		2002		12	?	16		12.702	-87.004			2002	2002	1	2002	2002	1
252010	Langila	14998	Confirmed Eruption	Crater 2	2			2002		5	?	25		Historical Observations		2003		4	?	9		-5.525	148.42			2002	2003	2	2002	2002	1
242050	Monowai	14718	Confirmed Eruption		0			2002		5		24		Hydrophonic		2002		5		24		-25.887	-177.188			2002	2002	1	2002	2002	1
223030	Nyiragongo	14107	Confirmed Eruption		2			2002		5	?	17		Historical Observations	>	2021		3		12		-1.52	29.25			2002	2021	20	2002	2002	1
282060	Kikai	17001	Confirmed Eruption	Iwo-dake	2			2002		5		11		Historical Observations		2002		7		16	15	30.793	130.305			2002	2002	1	2002	2002	1
256010	Tinakula	15207	Uncertain Eruption	Upper NW flank	1			2002		4		16	15	Historical Observations								-10.386	165.804			2002		0	2002	2002	1
352020	Guagua Pichincha	11498	Confirmed Eruption		1	?		2002		4		16	15	Historical Observations		2002		4		16	15	-0.171	-78.598			2002	2002	1	2002	2002	1
300260	Klyuchevskoy	19479	Confirmed Eruption		2			2002		4		9		Historical Observations		2002		6	<	9		56.056	160.642			2002	2002	1	2002	2002	1
257060	Epi	15331	Confirmed Eruption		1	?		2002		3		16	15	Historical Observations		2002		3		16	15	-16.68	168.37			2002	2002	1	2002	2002	1
284110	Kita-Ioto	18393	Uncertain Eruption	Funka-Asane	0			2002		2		28				2002		2		28		25.424	141.284			2002	2002	1	2002	2002	1
266100	Lokon-Empung	16461	Confirmed Eruption	Tompaluan	2			2002		2		9		Historical Observations		2002		5	?	16	15	1.358	124.792			2002	2002	1	2002	2002	1
290360	Chikurachki	18855	Confirmed Eruption	SSE part of summit crater	2			2002		1		25		Historical Observations		2002		4	?	22		50.324	155.461			2002	2002	1	2002	2002	1
223030	Nyiragongo	14106	Confirmed Eruption	South flank (2800-1570 m), summit crater	1			2002		1		17		Historical Observations		2002		2	>	3		-1.52	29.25			2002	2002	1	2002	2002	1
343100	San Miguel	10866	Confirmed Eruption		1			2002		1		16		Historical Observations		2002		1		16		13.434	-88.269			2002	2002	1	2002	2002	1
251020	Manam	14930	Confirmed Eruption	South Crater	3	?		2002		1		13		Historical Observations		2002		5		21		-4.08	145.037			2002	2002	1	2002	2002	1
233020	Fournaise, Piton de la	14382	Confirmed Eruption	NE part of l'Enclos Fouqué caldera	1			2002		1		5		Historical Observations		2002		1		16		-21.244	55.708			2002	2002	1	2002	2002	1
342090	Fuego	10733	Confirmed Eruption		3			2002		1		4		Historical Observations	>	2021		3		12		14.473	-90.88			2002	2021	20	2002	2002	1
211060	Etna	13835	Confirmed Eruption	Central Crater, NE Crater	1			2001		12	?	16	15	Historical Observations		2002		10	?	30		37.748	14.999			2001	2002	2	2002	2002	1
300250	Bezymianny	19379	Confirmed Eruption		2			2001		12		10		Historical Observations		2002		1	?	6		55.972	160.595			2001	2002	2	2002	2002	1
360160	Kick 'em Jenny	12468	Confirmed Eruption		0			2001		12		4		Hydrophonic		2001		12		6		12.3	-61.64			2001	2001	1	2002	2002	1
352020	Guagua Pichincha	11497	Confirmed Eruption	North of 1981 crater	1	?		2001		11		26		Historical Observations		2001		11		26		-0.171	-78.598			2001	2001	1	2002	2002	1
385052	Walvis Ridge at 33°S	13144	Confirmed Eruption	Seamount NW of Wüst seamount	0			2001		11		24		Historical Observations		2002		3		16	15	-32.958	-5.22			2001	2002	2	2002	2002	1
300130	Karymsky	19187	Confirmed Eruption	Summit and upper south flank	3			2001		11		15		Historical Observations		2016		4		1		54.049	159.443			2001	2016	16	2002	2002	1
284080	Sumisujima	18353	Uncertain Eruption		0			2001		10		31				2002		2		28		31.44	140.051			2001	2002	2	2002	2002	1
342110	Pacaya	19880	Confirmed Eruption	MacKenney Crater	1			2001		10		31		Historical Observations		2001		10		31		14.382	-90.601			2001	2001	1	2001	2001	1
284121	Kita-Fukutokutai	18401	Uncertain Eruption	24.443 N, 141.378 E	0			2001		10		30				2001		10		30		24.417	141.417			2001	2001	1	2001	2001	1
284130	Fukutoku-Oka-no-Ba	18465	Uncertain Eruption		0			2001		10		30				2002		6		19		24.285	141.481			2001	2002	2	2001	2001	1
284110	Kita-Ioto	18392	Uncertain Eruption	Funka-Asane	0			2001		10		29				2001		10		29		25.424	141.284			2001	2001	1	2001	2001	1
300100	Avachinsky	19104	Confirmed Eruption		1			2001		10		5		Historical Observations		2001		10		5		53.256	158.836			2001	2001	1	2001	2001	1
390081	Montagu Island	13205	Confirmed Eruption	NW of Mount Belinda	1	?		2001		10		1	20	Historical Observations		2007		9		20		-58.445	-26.374			2001	2007	7	2001	2001	1
243091	Unnamed	14772	Confirmed Eruption		2			2001		9		27		Historical Observations		2001		9	?	28		-18.325	-174.365			2001	2001	1	2001	2001	1
261160	Talang	15494	Confirmed Eruption	Kepundan Panjang & Kabuo, Gabuo Atas	1			2001		9		25		Historical Observations		2001		11		15	3	-0.979	100.681			2001	2001	1	2001	2001	1
284120	Ioto	18421	Confirmed Eruption	Off SE coast and Idogahama (NW coast)	1			2001		9		21		Historical Observations		2001		10		23		24.751	141.289			2001	2001	1	2001	2001	1
252120	Ulawun	15065	Confirmed Eruption		2			2001		8		28		Historical Observations		2001		8		28		-5.05	151.33			2001	2001	1	2001	2001	1
300250	Bezymianny	19378	Confirmed Eruption		3			2001		7	?	23		Historical Observations		2001		8	?	10		55.972	160.595			2001	2001	1	2001	2001	1
262000	Krakatau	15625	Confirmed Eruption	Anak Krakatau	1			2001		7		21		Historical Observations		2001		9	?	17		-6.102	105.423			2001	2001	1	2001	2001	1
211060	Etna	13832	Confirmed Eruption	S to NE flanks (3100-2100 m)	2			2001		7		17		Historical Observations		2001		8		9		37.748	14.999			2001	2001	1	2001	2001	1
251020	Manam	14929	Confirmed Eruption		2			2001		6		14		Historical Observations		2001		6	?	25		-4.08	145.037			2001	2001	1	2001	2001	1
233020	Fournaise, Piton de la	14381	Confirmed Eruption	ESE flank (2500 m), East flank (1800-2000 m)	1			2001		6		11		Historical Observations		2001		7		7		-21.244	55.708			2001	2001	1	2001	2001	1
257050	Lopevi	15317	Confirmed Eruption	NW flank (200-400 m)	3			2001		6		8		Historical Observations		2001		6	>	19		-16.507	168.346			2001	2001	1	2001	2001	1
312030	Pavlof	20152	Uncertain Eruption		1	?		2001		6		5	4									55.417	-161.894			2001		0	2001	2001	1
268030	Ibu	16580	Confirmed Eruption		0			2001		5	?	28		Historical Observations		2001		10	?	3		1.488	127.63			2001	2001	1	2001	2001	1
355100	Lascar	11874	Uncertain Eruption					2001		5	?	17				2001		7	?	5		-23.37	-67.73			2001	2001	1	2001	2001	1
261170	Kerinci	15528	Confirmed Eruption		2			2001		5		12		Historical Observations		2002		8	?	27		-1.697	101.264			2001	2002	2	2001	2001	1
344020	San Cristobal	10888	Confirmed Eruption		1			2001		5	?	11		Historical Observations		2001		12	?	9		12.702	-87.004			2001	2001	1	2001	2001	1
234011	McDonald Islands	14397	Confirmed Eruption		1	?		2001		5		3	150	Historical Observations								-53.03	72.6			2001		0	2001	2001	1
284141	Ahyi	18474	Confirmed Eruption	20.34°N, 145.02°E	0			2001		4		24		Hydrophonic		2001		4		25		20.42	145.03			2001	2001	1	2001	2001	1
344100	Masaya	11037	Confirmed Eruption	Santiago	1			2001		4		23		Historical Observations		2001		4	?	25		11.985	-86.165			2001	2001	1	2001	2001	1
261140	Marapi	15478	Confirmed Eruption	Verbeek Crater	2			2001		4		13		Historical Observations		2001		6		5		-0.38	100.474			2001	2001	1	2001	2001	1
233020	Fournaise, Piton de la	14380	Confirmed Eruption	South flank (below Dolomieu at ~2500 m)	1			2001		3		27		Historical Observations		2001		4		4		-21.244	55.708			2001	2001	1	2001	2001	1
241040	Whakaari/White Island	14495	Confirmed Eruption	MH vent	2			2001		2		19		Historical Observations		2001		2	?	19		-37.52	177.18			2001	2001	1	2001	2001	1
223020	Nyamulagira	14081	Confirmed Eruption	North and SSE flanks	2	?		2001		2		6		Historical Observations		2001		4		5	4	-1.408	29.2			2001	2001	1	2001	2001	1
311240	Cleveland	19816	Confirmed Eruption		3	?		2001		2	<	2		Historical Observations		2001		4	?	15		52.825	-169.944			2001	2001	1	2001	2001	1
344040	Telica	10935	Confirmed Eruption		1			2001		1		17		Historical Observations		2001		12	?	19		12.606	-86.84			2001	2001	1	2001	2001	1
284096	Nishinoshima	18366	Uncertain Eruption		0			2001		1		16	15									27.247	140.874			2001		0	2000	2000	1
252120	Ulawun	15064	Confirmed Eruption	Summit and NNE flank	3			2001		1	?	16		Historical Observations		2001		5		3		-5.05	151.33			2001	2001	1	2000	2000	1
264090	Inielika	16258	Confirmed Eruption	Summit crater complex	2			2001		1		11		Historical Observations		2001		3	?	16	15	-8.73	120.98			2001	2001	1	2000	2000	1
284040	Miyakejima	18274	Confirmed Eruption		2			2001		1		11		Historical Observations		2002		11		24		34.094	139.526			2001	2002	2	2000	2000	1
273030	Mayon	16810	Confirmed Eruption		3			2001		1		8		Historical Observations		2001		8		8		13.257	123.685			2001	2001	1	2000	2000	1
261030	Peuet Sague	15395	Confirmed Eruption		2			2000		12		25		Historical Observations		2000		12	>	26		4.903	96.289			2000	2000	1	2000	2000	1
282030	Suwanosejima	16946	Confirmed Eruption	O-take (Upper NE flank)	3	?		2000		12		19		Historical Observations		2004		7	?	5		29.638	129.714			2000	2004	5	2000	2000	1
263310	Tengger Caldera	16062	Confirmed Eruption	Bromo	2			2000		11		29		Historical Observations		2001		1	>	15		-7.942	112.95			2000	2001	2	2000	2000	1
284080	Sumisujima	18352	Uncertain Eruption		0			2000		10		30				2000		10		30		31.44	140.051			2000	2000	1	2000	2000	1
284110	Kita-Ioto	18391	Uncertain Eruption	Funka-Asane	0			2000		10		30				2000		10		30		25.424	141.284			2000	2000	1	2000	2000	1
282060	Kikai	17000	Confirmed Eruption	Iwo-dake	1			2000		10		16	15	Historical Observations		2001		12		16	15	30.793	130.305			2000	2001	2	2000	2000	1
252120	Ulawun	15063	Confirmed Eruption		4			2000		9		28		Historical Observations		2000		11		1		-5.05	151.33			2000	2000	1	2000	2000	1
285020	Hokkaido-Komagatake	18582	Confirmed Eruption		1			2000		9		4		Historical Observations		2000		11		8		42.063	140.677			2000	2000	1	2000	2000	1
263350	Ijen	16176	Uncertain Eruption	Kawah Ijen	1			2000		9		1	5			2000		9		10	3	-8.058	114.242			2000	2000	1	2000	2000	1
261220	Kaba	15548	Confirmed Eruption		1			2000		8	?	22		Historical Observations		2000		8	?	27		-3.522	102.615			2000	2000	1	2000	2000	1
342110	Pacaya	10763	Confirmed Eruption	MacKenney Crater	1			2000		8		16	15	Historical Observations		2001		7	?	5		14.382	-90.601			2000	2001	2	2000	2000	1
373030	Bardarbunga	12892	Uncertain Eruption	Loki-Fögrufjöll (W and E Loki cauldrons)	0			2000		8		16	15									64.633	-17.516			2000		0	2000	2000	1
311360	Shishaldin	20099	Uncertain Eruption	Summit	1	?		2000		8		11										54.756	-163.97			2000		0	2000	2000	1
300260	Klyuchevskoy	19478	Confirmed Eruption		2			2000		7		28		Historical Observations		2000		9		22		56.056	160.642			2000	2000	1	2000	2000	1
284130	Fukutoku-Oka-no-Ba	18464	Uncertain Eruption		0			2000		7		26				2001		6		13		24.285	141.481			2000	2001	2	2000	2000	1
355100	Lascar	11873	Confirmed Eruption		2			2000		7		20		Historical Observations		2001		1	?	18		-23.37	-67.73			2000	2001	2	2000	2000	1
300250	Bezymianny	19377	Confirmed Eruption		2			2000		7		18		Historical Observations		2000		11	>	4		55.972	160.595			2000	2000	1	2000	2000	1
263180	Slamet	15764	Uncertain Eruption		1	?		2000		7	?	16	15			2000		10	?	16	15	-7.242	109.208			2000	2000	1	2000	2000	1
273030	Mayon	16809	Confirmed Eruption		2			2000		7		16		Historical Observations		2000		8		31		13.257	123.685			2000	2000	1	2000	2000	1
263340	Raung	16161	Confirmed Eruption		2	?		2000		7		9		Historical Observations		2000		7		9		-8.119	114.056			2000	2000	1	2000	2000	1
357090	Copahue	12011	Confirmed Eruption	Agrio Crater	2			2000		7		1		Historical Observations		2000		10		18		-37.856	-71.183			2000	2000	1	2000	2000	1
300060	Mutnovsky	18973	Confirmed Eruption		1	?		2000		6		30		Hydrophonic		2000		6		30		52.449	158.196			2000	2000	1	2000	2000	1
284040	Miyakejima	18273	Confirmed Eruption	Summit and submarine western flank	3			2000		6		27		Historical Observations		2000		9		28		34.094	139.526			2000	2000	1	2000	2000	1
233020	Fournaise, Piton de la	14379	Confirmed Eruption	SE flank (2100-1800 m), E flank (2260-2000 m)	1			2000		6		23		Historical Observations		2000		11		13		-21.244	55.708			2000	2000	1	2000	2000	1
251020	Manam	14928	Confirmed Eruption	South Crater	2			2000		6		3		Historical Observations		2000		6		4		-4.08	145.037			2000	2000	1	2000	2000	1
262000	Krakatau	15624	Confirmed Eruption	Anak Krakatau	1			2000		5		29		Historical Observations		2000		10	?	30		-6.102	105.423			2000	2000	1	2000	2000	1
224010	Cameroon	14135	Confirmed Eruption	Upper SW flank (4000, 3470-3220, 2750 m)	2	?		2000		5		28		Historical Observations		2000		9		15	5	4.203	9.17			2000	2000	1	2000	2000	1
266030	Soputan	16435	Confirmed Eruption		2			2000		5		13		Historical Observations		2003		9	?	4		1.112	124.737			2000	2003	4	1999	1999	1
390090	Saunders	13204	Confirmed Eruption		0			2000		5		13		Historical Observations		2013		11		16		-57.8	-26.483			2000	2013	14	1999	1999	1
266100	Lokon-Empung	16460	Confirmed Eruption	Tompaluan	2			2000		5		10	3	Historical Observations		2001		8		18		1.358	124.792			2000	2001	2	1999	1999	1
354006	Sabancaya	11751	Confirmed Eruption		2			2000		4	?	16	15	Historical Observations		2000		10	>	29		-15.787	-71.857			2000	2000	1	1999	1999	1
285030	Toya	18602	Confirmed Eruption	Usu N flank (Kompira-yama & W Nishi-yama)	2			2000		3		31		Historical Observations		2001		9		15	5	42.544	140.839			2000	2001	2	1999	1999	1
351080	Galeras	11375	Confirmed Eruption		1			2000		3		21		Historical Observations		2000		5		18		1.22	-77.37			2000	2000	1	1999	1999	1
300060	Mutnovsky	18972	Confirmed Eruption	North crater	2			2000		3		17		Historical Observations		2000		3		17		52.449	158.196			2000	2000	1	1999	1999	1
300250	Bezymianny	19376	Confirmed Eruption		2			2000		3		14		Historical Observations		2000		3		26	1	55.972	160.595			2000	2000	1	1999	1999	1
261140	Marapi	15477	Confirmed Eruption		2			2000		3		11		Historical Observations		2000		4	>	3		-0.38	100.474			2000	2000	1	1999	1999	1
234010	Heard	14409	Confirmed Eruption	Mawson Peak and upper south flank	2			2000		3	?	7		Historical Observations		2001		2		16	15	-53.106	73.513			2000	2001	2	1999	1999	1
241040	Whakaari/White Island	14494	Confirmed Eruption	MH vent	3	?		2000		3		7		Historical Observations		2000		9		5	4	-37.52	177.18			2000	2000	1	1999	1999	1
256010	Tinakula	15206	Confirmed Eruption		1	?		2000		2	?	29		Historical Observations		2001		5	?	8		-10.386	165.804			2000	2001	2	1999	1999	1
255020	Bagana	15139	Confirmed Eruption		2		<	2000		2		28		Historical Observations	>	2021		3		12		-6.137	155.196			2000	2021	22	1999	1999	1
372070	Hekla	12754	Confirmed Eruption	SW flank	3			2000		2		26		Historical Observations		2000		3		8		63.983	-19.666			2000	2000	1	1999	1999	1
282030	Suwanosejima	16945	Confirmed Eruption	O-take	2	?		2000		2		24	4	Historical Observations		2000		2		24	4	29.638	129.714			2000	2000	1	1999	1999	1
233020	Fournaise, Piton de la	14378	Confirmed Eruption	North flank of Dolomieu (2490-2250 m)	1			2000		2		14		Historical Observations		2000		3		4		-21.244	55.708			2000	2000	1	1999	1999	1
300260	Klyuchevskoy	19477	Confirmed Eruption		2			2000		2		3		Historical Observations		2000		2	?	8		56.056	160.642			2000	2000	1	1999	1999	1
223020	Nyamulagira	14080	Confirmed Eruption	SE flank (Ngerageze)	2	?		2000		1		27		Historical Observations		2000		2	>	10		-1.408	29.2			2000	2000	1	1999	1999	1
284110	Kita-Ioto	18390	Uncertain Eruption	Funka-Asane	0			2000		1		25				2000		1		26		25.424	141.284			2000	2000	1	1999	1999	1
260010	Barren Island	15385	Uncertain Eruption		1	?		2000		1		16	15									12.278	93.858			2000		0	1999	1999	1
282060	Kikai	16999	Confirmed Eruption	Iwo-dake	2	?		2000		1		16	15	Historical Observations		2000		3		16	15	30.793	130.305			2000	2000	1	1999	1999	1
344120	Concepcion	11072	Confirmed Eruption		1			1999		12		27		Historical Observations		1999		12	?	29		11.538	-85.622			1999	1999	1	1999	1999	1
344100	Masaya	11036	Confirmed Eruption	Santiago	1			1999		11		22		Historical Observations		2000		3	?	2		11.985	-86.165			1999	2000	2	1999	1999	1
255060	Kavachi	15178	Confirmed Eruption		1			1999		11	?	16	15	Historical Observations		2003		8		16	15	-8.991	157.979			1999	2003	5	1999	1999	1
252120	Ulawun	15062	Confirmed Eruption		1			1999		10		20		Historical Observations		1999		10		20		-5.05	151.33			1999	1999	1	1999	1999	1
290100	Moyorodake [Medvezhia]	18765	Confirmed Eruption	Kudriavy	1			1999		10		7		Historical Observations		1999		10		13		45.389	148.838			1999	1999	1	1999	1999	1
352080	Tungurahua	11643	Confirmed Eruption		3			1999		10		5		Historical Observations		2009		7		8	7	-1.467	-78.442			1999	2009	11	1999	1999	1
311360	Shishaldin	20098	Uncertain Eruption		1	?		1999		9		25	5			2000		2	?	4		54.756	-163.97			1999	2000	2	1999	1999	1
284120	Ioto	18420	Confirmed Eruption	Asodai area	1			1999		9		10		Historical Observations		1999		9		10		24.751	141.289			1999	1999	1	1999	1999	1
284130	Fukutoku-Oka-no-Ba	18463	Uncertain Eruption		0			1999		9		8				2000		2		18		24.285	141.481			1999	2000	2	1998	1998	1
284110	Kita-Ioto	18389	Uncertain Eruption	Funka-Asane	0			1999		9		7				1999		9		16		25.424	141.284			1999	1999	1	1998	1998	1
300270	Sheveluch	19594	Confirmed Eruption		4	?		1999		8		15		Historical Observations	>	2021		3		12		56.653	161.36			1999	2021	23	1998	1998	1
344070	Negro, Cerro	10970	Confirmed Eruption	South flank (near Cristo Rey crater)	2			1999		8		5		Historical Observations		1999		8		7		12.506	-86.702			1999	1999	1	1998	1998	1
263340	Raung	16156	Confirmed Eruption		2			1999		7		30		Historical Observations								-8.119	114.056			1999		0	1998	1998	1
233020	Fournaise, Piton de la	14377	Confirmed Eruption	Dolomieu, E (2500-2100) &S flanks (1900 m)	1			1999		7		19		Historical Observations		1999		10		23		-21.244	55.708			1999	1999	1	1998	1998	1
372030	Katla	12679	Uncertain Eruption	W, S, and E margins of caldera	0			1999		7	?	17				1999		8		15	5	63.633	-19.083			1999	1999	1	1998	1998	1
263350	Ijen	16175	Confirmed Eruption	Kawah Ijen	1	?		1999		6		28		Historical Observations		1999		6		28		-8.058	114.242			1999	1999	1	1998	1998	1
273030	Mayon	16808	Confirmed Eruption		3			1999		6		22		Historical Observations		2000		3		19		13.257	123.685			1999	2000	2	1998	1998	1
282030	Suwanosejima	16944	Confirmed Eruption	O-take	1	?		1999		6		15	5	Historical Observations		1999		6		30	4	29.638	129.714			1999	1999	1	1998	1998	1
242050	Monowai	14717	Confirmed Eruption		0			1999		6		6		Hydrophonic		1999		6		11		-25.887	-177.188			1999	1999	1	1998	1998	1
264250	Iliwerung	16350	Confirmed Eruption	Hobal (submarine vent on SE flank)	0			1999		5		22		Historical Observations		1999		9	>	16	15	-8.53	123.57			1999	1999	1	1998	1998	1
342090	Fuego	10732	Confirmed Eruption		2			1999		5		21		Historical Observations		2000		12	>	9		14.473	-90.88			1999	2000	2	1998	1998	1
344040	Telica	10934	Confirmed Eruption		2			1999		5		21		Historical Observations		2000		9		6		12.606	-86.84			1999	2000	2	1998	1998	1
256010	Tinakula	15205	Confirmed Eruption		1	?		1999		5		16	15	Historical Observations								-10.386	165.804			1999		0	1998	1998	1
315020	Wrangell	20419	Uncertain Eruption		1			1999		5		14		Historical Observations		1999		5		14		62.006	-144.017			1999	1999	1	1998	1998	1
263180	Slamet	15763	Confirmed Eruption		1			1999		5	?	1		Historical Observations		1999		9	?	16	15	-7.242	109.208			1999	1999	1	1998	1998	1
344020	San Cristobal	10887	Confirmed Eruption		2			1999		5		1	180	Historical Observations		2000		6		16	15	12.702	-87.004			1999	2000	2	1998	1998	1
261140	Marapi	15476	Confirmed Eruption		2			1999		4	<	16	15	Historical Observations		1999		9	>	16	15	-0.38	100.474			1999	1999	1	1998	1998	1
377020	East Gakkel Ridge at 85°E	12976	Confirmed Eruption	East Gakkel Ridge	2			1999		4	?	5		Seismicity		1999		4	?	15		85.608	85.25			1999	1999	1	1998	1998	1
300270	Sheveluch	19588	Confirmed Eruption		2			1999		4		3		Historical Observations		1999		4		12		56.653	161.36			1999	1999	1	1998	1998	1
264180	Lewotobi	16299	Confirmed Eruption	Lewotobi Lakilaki	2			1999		3		31		Historical Observations		1999		7	?	1		-8.542	122.775			1999	1999	1	1998	1998	1
224010	Cameroon	14134	Confirmed Eruption	South flank (2650 and 1500 m)	2			1999		3		28		Historical Observations		1999		4		17		4.203	9.17			1999	1999	1	1997	1997	1
261170	Kerinci	15527	Confirmed Eruption		2			1999		3	<	16	15	Historical Observations		1999		9	>	16	15	-1.697	101.264			1999	1999	1	1997	1997	1
267020	Karangetang	16539	Confirmed Eruption		3	?		1999		3	<	16	15	Historical Observations		2003		10		28		2.781	125.407			1999	2003	5	1997	1997	1
264010	Batur	16206	Confirmed Eruption		1			1999		3		15		Historical Observations		2000		6	?	16	15	-8.242	115.375			1999	2000	2	1997	1997	1
311360	Shishaldin	20097	Confirmed Eruption		3			1999		3		13		Historical Observations		1999		5		27		54.756	-163.97			1999	1999	1	1997	1997	1
261030	Peuet Sague	15394	Confirmed Eruption		1			1999		3	?	9		Historical Observations		1999		4		30	3	4.903	96.289			1999	1999	1	1997	1997	1
300250	Bezymianny	19375	Confirmed Eruption		2			1999		2		25		Historical Observations		1999		2		25		55.972	160.595			1999	1999	1	1997	1997	1
255060	Kavachi	15176	Confirmed Eruption		1			1999		2		16	15	Historical Observations		1999		5		16	15	-8.991	157.979			1999	1999	1	1997	1997	1
262000	Krakatau	15623	Confirmed Eruption	Anak Krakatau	2			1999		2		5		Historical Observations		1999		8	>	16	15	-6.102	105.423			1999	1999	1	1997	1997	1
300260	Klyuchevskoy	19476	Confirmed Eruption		2			1999		2		5		Historical Observations		1999		7		12		56.056	160.642			1999	1999	1	1997	1997	1
257060	Epi	15330	Confirmed Eruption		1	?	?	1999		2		1	30	Historical Observations								-16.68	168.37			1999		0	1997	1997	1
390090	Saunders	22333	Confirmed Eruption		0			1999		1		19		Historical Observations		1999		1		19		-57.8	-26.483			1999	1999	1	1997	1997	1
243030	Unnamed	14729	Confirmed Eruption		1			1999		1	<	8		Historical Observations		1999		1	?	14		-20.852	-175.55			1999	1999	1	1997	1997	1
282030	Suwanosejima	16943	Confirmed Eruption	O-take	1	?		1999		1		5	5	Historical Observations		1999		2		24	4	29.638	129.714			1999	1999	1	1997	1997	1
268030	Ibu	16579	Confirmed Eruption		2			1998		12		18		Historical Observations		1999		9	>	16	15	1.488	127.63			1998	1999	2	1997	1997	1
373010	Grimsvotn	12841	Confirmed Eruption	South caldera wall	3			1998		12		18		Historical Observations		1998		12		28		64.416	-17.316			1998	1998	1	1997	1997	1
382050	Terceira	19963	Confirmed Eruption	Serreta Ridge (submarine vent W of Terceira)	0			1998		11	?	25		Historical Observations		2000		3	?	16	15	38.73	-27.32			1998	2000	3	1997	1997	1
357040	Planchon-Peteroa	11946	Confirmed Eruption		1			1998		11		18		Historical Observations		1998		11		21		-35.223	-70.568			1998	1998	1	1997	1997	1
357110	Llaima	12073	Confirmed Eruption		2			1998		11		10	3	Historical Observations								-38.692	-71.729			1998		0	1997	1997	1
285070	Akan	18703	Confirmed Eruption	Me-Akan (Ponmachineshiri)	1			1998		11		9		Historical Observations		1998		11		9		43.384	144.013			1998	1998	1	1997	1997	1
311360	Shishaldin	20096	Confirmed Eruption		1			1998		11		4		Historical Observations		1998		11		4		54.756	-163.97			1998	1998	1	1997	1997	1
261170	Kerinci	15526	Confirmed Eruption		2	?		1998		11		3		Historical Observations								-1.697	101.264			1998		0	1997	1997	1
284110	Kita-Ioto	18388	Uncertain Eruption	Funka-Asane	0			1998		10		27				1998		10		27		25.424	141.284			1998	1998	1	1997	1997	1
284080	Sumisujima	18351	Uncertain Eruption		0			1998		10		27				1999		1		13		31.44	140.051			1998	1999	2	1996	1996	1
285020	Hokkaido-Komagatake	18581	Confirmed Eruption	1996 crater	2			1998		10		25		Historical Observations		1998		10		25		42.063	140.677			1998	1998	1	1996	1996	1
223020	Nyamulagira	14079	Confirmed Eruption		2	?		1998		10		17		Historical Observations		1998		10	>	25		-1.408	29.2			1998	1998	1	1996	1996	1
284130	Fukutoku-Oka-no-Ba	18462	Uncertain Eruption		0			1998		10		16				1999		1		12		24.285	141.481			1998	1999	2	1996	1996	1
353060	Azul, Cerro	11729	Confirmed Eruption	N & W caldera floor, SE flank (630-680 m)	1			1998		9		15		Historical Observations		1998		10		21		-0.92	-91.408			1998	1998	1	1996	1996	1
344100	Masaya	11035	Confirmed Eruption	Santiago	1			1998		9		14		Historical Observations		1998		9		14		11.985	-86.165			1998	1998	1	1996	1996	1
241040	Whakaari/White Island	14493	Confirmed Eruption	NW corner of 1978/90 crater complex	2			1998		8		22		Historical Observations		1999		8		16	15	-37.52	177.18			1998	1999	2	1996	1996	1
312110	Chiginagak	20199	Confirmed Eruption		1			1998		8		13		Historical Observations		1998		8	?	13		57.135	-156.99			1998	1998	1	1996	1996	1
352020	Guagua Pichincha	11496	Confirmed Eruption	West and SE of 1981 crater	3			1998		8		7		Historical Observations		2001		5		25		-0.171	-78.598			1998	2001	4	1996	1996	1
300260	Klyuchevskoy	19475	Confirmed Eruption		2			1998		7		23		Historical Observations		1998		9	?	2		56.056	160.642			1998	1998	1	1996	1996	1
257050	Lopevi	15316	Confirmed Eruption	1963 crater (NW flank 1000 m)	3			1998		7		16	15	Historical Observations		2000		4	?	25		-16.507	168.346			1998	2000	3	1996	1996	1
267020	Karangetang	16538	Confirmed Eruption		1			1998		7		5	4	Historical Observations								2.781	125.407			1998		0	1996	1996	1
261170	Kerinci	15525	Confirmed Eruption		2			1998		7		4		Historical Observations		1998		7		4		-1.697	101.264			1998	1998	1	1996	1996	1
264010	Batur	16205	Confirmed Eruption		1			1998		7		4	3	Historical Observations								-8.242	115.375			1998		0	1996	1996	1
255060	Kavachi	15175	Uncertain Eruption		0			1998		7		2	182									-8.991	157.979			1998		0	1996	1996	1
300250	Bezymianny	19374	Confirmed Eruption		0			1998		6	?	20		Historical Observations		1998		6	?	22		55.972	160.595			1998	1998	1	1996	1996	1
300270	Sheveluch	19587	Confirmed Eruption		3			1998		5		30		Historical Observations		1998		9		3		56.653	161.36			1998	1998	1	1996	1996	1
284110	Kita-Ioto	18387	Uncertain Eruption	Funka-Asane	0			1998		5		21				1998		5		21		25.424	141.284			1998	1998	1	1996	1996	1
311161	Korovin	19764	Confirmed Eruption		3			1998		5		8	1	Historical Observations		1998		7	?	8		52.381	-174.166			1998	1998	1	1996	1996	1
282060	Kikai	16998	Confirmed Eruption	Iwo-dake	2			1998		4		25		Historical Observations		1999		8		16	15	30.793	130.305			1998	1999	2	1996	1996	1
261030	Peuet Sague	15393	Confirmed Eruption		1			1998		4		19		Historical Observations		1998		4	?	26		4.903	96.289			1998	1998	1	1996	1996	1
357110	Llaima	12072	Confirmed Eruption		2	?		1998		4		3		Historical Observations		1998		4	?	23		-38.692	-71.729			1998	1998	1	1996	1996	1
283090	Niigata-Yakeyama	17551	Confirmed Eruption	Upper east flank	1			1998		3		30		Historical Observations								36.921	138.036			1998		0	1996	1996	1
241040	Whakaari/White Island	14492	Confirmed Eruption		1			1998		3		28		Historical Observations		1998		3		29		-37.52	177.18			1998	1998	1	1995	1995	1
233020	Fournaise, Piton de la	14376	Confirmed Eruption	N and WSW of Dolomieu, outer N flank	1			1998		3		9		Historical Observations		1998		9	?	20		-21.244	55.708			1998	1998	1	1995	1995	1
357120	Villarrica	12179	Confirmed Eruption		1			1998		2		24	4	Historical Observations		2002		6	?	16	15	-39.42	-71.93			1998	2002	5	1995	1995	1
345020	Rincon de la Vieja	11106	Confirmed Eruption		2			1998		2		15		Historical Observations		1998		9		16	15	10.83	-85.324			1998	1998	1	1995	1995	1
331021	Axial Seamount	20713	Confirmed Eruption	South end of Axial caldera	0			1998		1		25		Historical Observations		1998		2	?	5		45.95	-130			1998	1998	1	1995	1995	1
343100	San Miguel	10865	Confirmed Eruption		1			1997		12		31		Historical Observations								13.434	-88.269			1997		0	1995	1995	1
242050	Monowai	14716	Confirmed Eruption		0			1997		12		15		Hydrophonic		1998		2	?	4		-25.887	-177.188			1997	1998	2	1995	1995	1
300250	Bezymianny	19373	Confirmed Eruption		3			1997		12		5		Historical Observations		1997		12		6		55.972	160.595			1997	1997	1	1995	1995	1
341040	Colima	10475	Confirmed Eruption	1994 crater	3			1997		11		22		Historical Observations		2011		6		21		19.514	-103.62			1997	2011	15	1995	1995	1
284080	Sumisujima	18350	Uncertain Eruption		0			1997		11		21				1997		11		21		31.44	140.051			1997	1997	1	1995	1995	1
284130	Fukutoku-Oka-no-Ba	18461	Uncertain Eruption		0			1997		11		18				1998		5		21		24.285	141.481			1997	1998	2	1995	1995	1
283090	Niigata-Yakeyama	17550	Confirmed Eruption	Upper east flank	1			1997		10		29		Historical Observations		1997		12		10		36.921	138.036			1997	1997	1	1995	1995	1
241100	Ruapehu	14667	Confirmed Eruption		1			1997		10		9		Historical Observations		1997		10		18		-39.28	175.57			1997	1997	1	1995	1995	1
300260	Klyuchevskoy	19474	Confirmed Eruption		1			1997		9		7		Historical Observations		1997		9		26		56.056	160.642			1997	1997	1	1995	1995	1
290390	Alaid	18892	Uncertain Eruption					1997		8		23				1997		8		23		50.861	155.565			1997	1997	1	1995	1995	1
283260	Akita-Yakeyama	18090	Confirmed Eruption	Kare-numa	1			1997		8		16		Historical Observations		1997		8		16		39.964	140.757			1997	1997	1	1995	1995	1
373030	Bardarbunga	12891	Uncertain Eruption	Loki-Fögrufjöll (East Loki cauldron)	0			1997		8		16	15									64.633	-17.516			1997		0	1995	1995	1
360101	Watt, Morne	12374	Confirmed Eruption	NE of Watt Mtn (Valley of Desolation)	1			1997		7		15		Historical Observations		1997		7		15		15.307	-61.305			1997	1997	1	1995	1995	1
282060	Kikai	16997	Confirmed Eruption	Iwo-dake	1	?		1997		7		2	182	Historical Observations								30.793	130.305			1997		0	1995	1995	1
264050	Sangeang Api	16252	Confirmed Eruption		2	?		1997		7		2	182	Historical Observations		1999		7		2	182	-8.2	119.07			1997	1999	3	1995	1995	1
382070	Don Joao de Castro Bank	13000	Uncertain Eruption	NW of Don Joao de Castro Bank	0			1997		6		27				1997		7	?	16	15	38.23	-26.63			1997	1997	1	1995	1995	1
344100	Masaya	11034	Confirmed Eruption	Santiago	1			1997		6	?	3		Historical Observations		1997		11		17		11.985	-86.165			1997	1997	1	1995	1995	1
311360	Shishaldin	20095	Confirmed Eruption		1			1997		6		2		Historical Observations		1997		6		2		54.756	-163.97			1997	1997	1	1995	1995	1
344020	San Cristobal	10886	Confirmed Eruption		1			1997		5	?	19		Historical Observations		1997		7	>	7		12.702	-87.004			1997	1997	1	1995	1995	1
283260	Akita-Yakeyama	18089	Confirmed Eruption	NE flank (Sumikawa-Onsen)	1			1997		5		11		Historical Observations		1997		5		11		39.964	140.757			1997	1997	1	1995	1995	1
300250	Bezymianny	19372	Confirmed Eruption		3			1997		5		8		Historical Observations		1997		5	?	16		55.972	160.595			1997	1997	1	1995	1995	1
311240	Cleveland	19815	Confirmed Eruption		2	?		1997		5		5		Historical Observations		1997		5		5		52.825	-169.944			1997	1997	1	1994	1994	1
242050	Monowai	14715	Confirmed Eruption		0			1997		4		18		Hydrophonic		1997		4		21		-25.887	-177.188			1997	1997	1	1994	1994	1
263340	Raung	16155	Confirmed Eruption		2			1997		4	<	16	15	Historical Observations								-8.119	114.056			1997		0	1994	1994	1
262000	Krakatau	15622	Confirmed Eruption	Anak Krakatau	2			1997		3	<	16	15	Historical Observations		1997		5	>	16	15	-6.102	105.423			1997	1997	1	1994	1994	1
352020	Guagua Pichincha	11495	Confirmed Eruption	1981 crater	1			1997		3		16	15	Historical Observations		1997		10		18		-0.171	-78.598			1997	1997	1	1994	1994	1
357110	Llaima	12071	Confirmed Eruption		1			1997		3	?	16	15	Historical Observations		1997		10	?	16	15	-38.692	-71.729			1997	1997	1	1994	1994	1
284110	Kita-Ioto	18386	Uncertain Eruption	Funka-Asane	0			1997		3		10				1997		3		10		25.424	141.284			1997	1997	1	1994	1994	1
300270	Sheveluch	19586	Confirmed Eruption		2			1997		3		8		Historical Observations		1997		4		4		56.653	161.36			1997	1997	1	1994	1994	1
311190	Amukta	19790	Confirmed Eruption		1			1997		3		3		Historical Observations								52.5	-171.252			1997		0	1994	1994	1
311290	Okmok	19851	Confirmed Eruption	SW part of caldera (Cone A)	3			1997		2		11		Historical Observations		1997		5		19	4	53.43	-168.13			1997	1997	1	1994	1994	1
255060	Kavachi	15174	Confirmed Eruption		1			1997		1		16		Historical Observations		1997		1	>	17		-8.991	157.979			1997	1997	1	1994	1994	1
263200	Dieng Volcanic Complex	15790	Confirmed Eruption	Near Padangsari crater	1			1996		12		31		Historical Observations		1996		12		31		-7.2	109.879			1996	1996	1	1994	1994	1
282030	Suwanosejima	16942	Confirmed Eruption	O-take	1			1996		12		26		Historical Observations		1997		4		17		29.638	129.714			1996	1997	2	1994	1994	1
234011	McDonald Islands	14396	Confirmed Eruption	Northern part of McDonald Island	1	?		1996		12		16	15	Historical Observations		1997		2		10	30	-53.03	72.6			1996	1997	2	1994	1994	1
344100	Masaya	11033	Confirmed Eruption	Santiago	1			1996		12		5		Historical Observations		1996		12		5		11.985	-86.165			1996	1996	1	1994	1994	1
290390	Alaid	18891	Confirmed Eruption		2			1996		12		3		Historical Observations								50.861	155.565			1996		0	1994	1994	1
223020	Nyamulagira	14078	Confirmed Eruption		3			1996		12		1		Historical Observations		1996		12	>	5		-1.408	29.2			1996	1996	1	1994	1994	1
285070	Akan	18702	Confirmed Eruption	Me-Akan (Ponmachineshiri crater no. 4)	1			1996		11		21		Historical Observations		1996		11		21		43.384	144.013			1996	1996	1	1994	1994	1
300260	Klyuchevskoy	19473	Confirmed Eruption		2			1996		11		14		Historical Observations		1997		3		20	12	56.056	160.642			1996	1997	2	1994	1994	1
355100	Lascar	11872	Confirmed Eruption		2			1996		10		18		Historical Observations		1996		10		18		-23.37	-67.73			1996	1996	1	1994	1994	1
267020	Karangetang	16537	Confirmed Eruption		1			1996		10	<	1		Historical Observations		1997		6	>	16	15	2.781	125.407			1996	1997	2	1994	1994	1
373010	Grimsvotn	12840	Confirmed Eruption	Gjálp (fissure N of caldera rim)	3	?		1996		9		30		Historical Observations		1996		11		6		64.416	-17.316			1996	1996	1	1994	1994	1
311070	Gareloi	19689	Uncertain Eruption		1	?		1996		9		27										51.79	-178.794			1996		0	1994	1994	1
242050	Monowai	14714	Confirmed Eruption		0			1996		9		20		Hydrophonic		1996		9		22		-25.887	-177.188			1996	1996	1	1994	1994	1
311190	Amukta	19789	Confirmed Eruption		1			1996		9		17		Historical Observations		1996		9		18		52.5	-171.252			1996	1996	1	1994	1994	1
357120	Villarrica	12178	Confirmed Eruption		1			1996		9		14		Historical Observations		1997		8		16	15	-39.42	-71.93			1996	1997	2	1994	1994	1
312030	Pavlof	20151	Confirmed Eruption		2			1996		9		11		Historical Observations		1997		1	?	3		55.417	-161.894			1996	1997	2	1993	1993	1
283170	Adatarayama	17913	Confirmed Eruption	Numanotaira	1			1996		9		1		Historical Observations		1996		9		1		37.647	140.281			1996	1996	1	1993	1993	1
390081	Montagu Island	13202	Uncertain Eruption		1	?		1996		9		1	180									-58.445	-26.374			1996		0	1993	1993	1
373030	Bardarbunga	12890	Uncertain Eruption	Loki-Fögrufjöll (West Loki cauldron)	0			1996		8		16	15									64.633	-17.516			1996		0	1993	1993	1
261170	Kerinci	15522	Confirmed Eruption		1			1996		8		16	15	Historical Observations		1996		10	?	16	15	-1.697	101.264			1996	1996	1	1993	1993	1
272020	Kanlaon	16746	Confirmed Eruption		2			1996		8		10		Historical Observations		1996		8		10		10.412	123.132			1996	1996	1	1993	1993	1
300250	Bezymianny	19371	Confirmed Eruption		0			1996		7	?	23		Historical Observations		1996		9		1		55.972	160.595			1996	1996	1	1993	1993	1
262000	Krakatau	15619	Confirmed Eruption	Anak Krakatau	2			1996		7	<	16	15	Historical Observations		1996		10	>	16	15	-6.102	105.423			1996	1996	1	1993	1993	1
268060	Gamalama	16674	Confirmed Eruption		2	?		1996		7		2	182	Historical Observations								0.8	127.33			1996		0	1993	1993	1
334070	Galapagos Rift	10348	Confirmed Eruption		0			1996	6	7		2	182	Historical Observations								0.792	-86.15			1996		0	1993	1993	1
284170	Pagan	18521	Confirmed Eruption	North Pagan	1			1996		7		2	182	Historical Observations								18.13	145.8			1996		0	1993	1993	1
311160	Atka	19763	Discredited Eruption					1996		6		29										52.331	-174.139			1996		0	1993	1993	1
267010	Ruang	16492	Uncertain Eruption					1996		6		27										2.3	125.37			1996		0	1993	1993	1
241100	Ruapehu	14666	Confirmed Eruption		3			1996		6		16		Historical Observations		1996		9		1		-39.28	175.57			1996	1996	1	1993	1993	1
257040	Ambrym	15295	Confirmed Eruption	Benbow, Marum, Niri Mbelesu, Mbwelesu	1			1996		6	<	16	15	Historical Observations		2005		8	>	16	15	-16.25	168.12			1996	2005	10	1993	1993	1
311110	Kanaga	19723	Uncertain Eruption		1	?		1996		6		11										51.923	-177.168			1996		0	1993	1993	1
261120	Sorikmarapi	15415	Uncertain Eruption					1996		5		5										0.686	99.539			1996		0	1993	1993	1
345040	Poas	11188	Confirmed Eruption		1			1996		4		8		Historical Observations		1996		4		8		10.2	-84.233			1996	1996	1	1993	1993	1
241100	Ruapehu	14665	Uncertain Eruption		0			1996		3	<	21										-39.28	175.57			1996		0	1993	1993	1
341090	Popocatepetl	10551	Confirmed Eruption		3			1996		3		5		Historical Observations		2003		11	?	22		19.023	-98.622			1996	2003	8	1993	1993	1
285020	Hokkaido-Komagatake	18580	Confirmed Eruption	1929 crater and summit crater fissure	1			1996		3		5		Historical Observations		1996		3	?	12		42.063	140.677			1996	1996	1	1993	1993	1
331031	North Gorda Ridge Segment	20722	Confirmed Eruption	Near center of North Gorda Ridge segment	0			1996		2	?	28		Historical Observations		1996		3	?	15		42.67	-126.78			1996	1996	1	1993	1993	1
332000	Loihi	20732	Confirmed Eruption		0			1996		2		25	30	Historical Observations		1996		8	?	9		18.92	-155.27			1996	1996	1	1993	1993	1
258001	Eastern Gemini Seamount	15356	Confirmed Eruption		1			1996		2		18		Historical Observations		1996		2	>	22		-20.98	170.28			1996	1996	1	1992	1992	1
282100	Unzendake	17182	Confirmed Eruption	Fugen-dake	2			1996		2		10		Historical Observations		1996		5		1		32.761	130.299			1996	1996	1	1992	1992	1
284080	Sumisujima	18349	Uncertain Eruption		0			1996		1		22				1996		1		22		31.44	140.051			1996	1996	1	1992	1992	1
357120	Villarrica	12174	Confirmed Eruption		1			1996		1		16	15	Historical Observations								-39.42	-71.93			1996		0	1992	1992	1
284131	Minami-Hiyoshi	18429	Uncertain Eruption		0			1996		1		11				1996		1		12		23.5	141.935			1996	1996	1	1992	1992	1
300125	Akademia Nauk	19125	Confirmed Eruption	North margin of Karymsky Lake	3			1996		1		2		Historical Observations		1996		1		3		53.98	159.45			1996	1996	1	1992	1992	1
300130	Karymsky	19186	Confirmed Eruption	New summit crater SW of 1970-82 crater	3			1996		1		2		Historical Observations		2000		12	?	20		54.049	159.443			1996	2000	5	1992	1992	1
311360	Shishaldin	20094	Confirmed Eruption		3			1995		12		23		Historical Observations		1996		5	<	16		54.756	-163.97			1995	1996	2	1992	1992	1
234000	Boomerang Seamount	14393	Confirmed Eruption		0			1995		12		1	30	Uranium-series								-37.721	77.825			1995		0	1992	1992	1
252140	Rabaul	15097	Confirmed Eruption	Tavurvur	2			1995		11		28		Historical Observations		2001		9		5	4	-4.271	152.203			1995	2001	7	1992	1992	1
242050	Monowai	14713	Confirmed Eruption		0			1995		11		27		Hydrophonic		1995		11		30		-25.887	-177.188			1995	1995	1	1992	1992	1
284130	Fukutoku-Oka-no-Ba	18460	Uncertain Eruption		0			1995		11		21				1997		7		28		24.285	141.481			1995	1997	3	1992	1992	1
312070	Veniaminof	20172	Confirmed Eruption	Western intracaldera cone	1			1995		11		15		Historical Observations		1995		11	?	30		56.17	-159.38			1995	1995	1	1992	1992	1
267020	Karangetang	16536	Confirmed Eruption		1			1995		11		9		Historical Observations		1995		12		17		2.781	125.407			1995	1995	1	1992	1992	1
345020	Rincon de la Vieja	11105	Confirmed Eruption		2			1995		11		6		Historical Observations		1995		11		13		10.83	-85.324			1995	1995	1	1992	1992	1
357110	Llaima	12070	Confirmed Eruption		2	?		1995		10		13		Historical Observations		1995		10	>	22		-38.692	-71.729			1995	1995	1	1992	1992	1
284202	Ruby	18534	Confirmed Eruption		0			1995		10	?	11		Historical Observations		1995		10		25		15.62	145.57			1995	1995	1	1992	1992	1
282120	Kujusan	17365	Confirmed Eruption	Hosho lava dome (east flank)	1			1995		10		11		Historical Observations		1996		3		24		33.086	131.249			1995	1996	2	1992	1992	1
300250	Bezymianny	19370	Confirmed Eruption		3	?		1995		9	<	16	15	Historical Observations		1995		10	?	8		55.972	160.595			1995	1995	1	1992	1992	1
357090	Copahue	12010	Confirmed Eruption	Agrio Crater	2			1995		9		16	15	Historical Observations								-37.856	-71.183			1995		0	1991	1991	1
264030	Rinjani	16225	Uncertain Eruption					1995		9		12										-8.42	116.47			1995		0	1991	1991	1
263310	Tengger Caldera	16061	Confirmed Eruption	Bromo	1			1995		9		9		Historical Observations		1995		12		16	15	-7.942	112.95			1995	1995	1	1991	1991	1
355040	Irruputuncu	11828	Confirmed Eruption		2			1995		9		1		Historical Observations		1995		9		26		-20.73	-68.55			1995	1995	1	1991	1991	1
263340	Raung	16154	Uncertain Eruption		2	?		1995		8		15										-8.119	114.056			1995		0	1991	1991	1
360050	Soufriere Hills	12346	Confirmed Eruption		3			1995		7		18		Historical Observations		2003		10		8		16.72	-62.18			1995	2003	9	1991	1991	1
373030	Bardarbunga	12889	Uncertain Eruption	Loki-Fögrufjöll (East Loki cauldron)	0			1995		7		16	15									64.633	-17.516			1995		0	1991	1991	1
284080	Sumisujima	18348	Uncertain Eruption		0			1995		7		5				1995		7		7		31.44	140.051			1995	1995	1	1991	1991	1
256010	Tinakula	15204	Confirmed Eruption		1	?		1995		7		2	182	Historical Observations								-10.386	165.804			1995		0	1991	1991	1
241040	Whakaari/White Island	14491	Confirmed Eruption	Wade Crater	1			1995		6	?	28		Historical Observations		1995		6	?	29		-37.52	177.18			1995	1995	1	1991	1991	1
311110	Kanaga	19722	Confirmed Eruption		2	?		1995		6	?	19		Historical Observations		1995		6	?	23		51.923	-177.168			1995	1995	1	1991	1991	1
243070	Lateiki	14767	Confirmed Eruption		2			1995		6		6		Historical Observations		1995		6		23	2	-19.18	-174.87			1995	1995	1	1991	1991	1
344070	Negro, Cerro	10966	Confirmed Eruption		2			1995		5		29		Historical Observations		1995		12		6		12.506	-86.702			1995	1995	1	1991	1991	1
311160	Atka	19751	Uncertain Eruption		1	?		1995		5		1										52.331	-174.139			1995		0	1991	1991	1
312070	Veniaminof	20171	Confirmed Eruption	Western intracaldera cone	1			1995		4		17		Historical Observations		1995		4		17		56.17	-159.38			1995	1995	1	1991	1991	1
390090	Saunders	13214	Confirmed Eruption		0			1995		4	?	16	15	Historical Observations		1998		2	>	16	15	-57.8	-26.483			1995	1998	4	1991	1991	1
357120	Villarrica	12173	Confirmed Eruption		1			1995		4		15	5	Historical Observations		1995		6	>	2		-39.42	-71.93			1995	1995	1	1991	1991	1
384010	Fogo	13137	Confirmed Eruption	WSW flank of Pico	2			1995		4		2		Historical Observations		1995		5		26		14.95	-24.35			1995	1995	1	1991	1991	1
263340	Raung	16153	Confirmed Eruption		1			1995		3		16	15	Historical Observations		1995		3		16	15	-8.119	114.056			1995	1995	1	1991	1991	1
263310	Tengger Caldera	16060	Confirmed Eruption	Bromo	1			1995		3		3		Historical Observations		1995		5		26	5	-7.942	112.95			1995	1995	1	1991	1991	1
257030	Ambae	15236	Confirmed Eruption	Lake Voui	2			1995		3		2		Historical Observations		1995		3	?	3		-15.389	167.835			1995	1995	1	1991	1991	1
283070	Yakedake	17524	Confirmed Eruption	SE flank (Azusa-gawa)	1			1995		2		11		Historical Observations		1995		2		11		36.227	137.587			1995	1995	1	1991	1991	1
311310	Makushin	19992	Confirmed Eruption		1			1995		1		30		Historical Observations		1995		1		30		53.891	-166.923			1995	1995	1	1991	1991	1
353010	Fernandina	11675	Confirmed Eruption	SW flank	2			1995		1		25		Historical Observations		1995		4	?	8		-0.37	-91.55			1995	1995	1	1991	1991	1
343100	San Miguel	10864	Confirmed Eruption		1			1995		1		12		Historical Observations		1995		4		19		13.434	-88.269			1995	1995	1	1991	1991	1
241100	Ruapehu	14664	Confirmed Eruption		3			1995		1	?	11		Historical Observations		1995		11		9		-39.28	175.57			1995	1995	1	1991	1991	1
244000	Vailulu'u	14802	Confirmed Eruption		0			1995		1		9		Hydrophonic		1995		1		29		-14.215	-169.058			1995	1995	1	1991	1991	1
341090	Popocatepetl	10550	Confirmed Eruption		2			1994		12		21		Historical Observations		1995		10		5		19.023	-98.622			1994	1995	2	1990	1990	1
260010	Barren Island	15384	Confirmed Eruption	Central cone summit, SW & S flanks	2			1994		12	<	20		Historical Observations		1995		6		5	8	12.278	93.858			1994	1995	2	1990	1990	1
257040	Ambrym	15290	Confirmed Eruption	Benbow and Marum	1	?		1994		12	<	16	15	Historical Observations								-16.25	168.12			1994		0	1990	1990	1
357090	Copahue	12009	Confirmed Eruption	Agrio Crater	2			1994		12		16	15	Historical Observations								-37.856	-71.183			1994		0	1990	1990	1
345060	Irazu	11232	Confirmed Eruption	Upper NW flank	2			1994		12		8		Historical Observations		1994		12		8		9.979	-83.852			1994	1994	1	1990	1990	1
273010	Bulusan	16769	Confirmed Eruption		2			1994		11		27		Historical Observations		1995		1	>	28		12.769	124.056			1994	1995	2	1990	1990	1
355100	Lascar	11871	Confirmed Eruption		2			1994		11		13		Historical Observations		1995		7		20		-23.37	-67.73			1994	1995	2	1990	1990	1
311240	Cleveland	19814	Confirmed Eruption		1	?		1994		10		20		Historical Observations		1994		10		20		52.825	-169.944			1994	1994	1	1990	1990	1
261230	Dempo	15573	Confirmed Eruption		1			1994		10		16	15	Historical Observations		1994		10		16	15	-4.016	103.121			1994	1994	1	1990	1990	1
357120	Villarrica	12172	Confirmed Eruption		1			1994		9		26		Historical Observations		1994		12		30		-39.42	-71.93			1994	1994	1	1990	1990	1
252140	Rabaul	15096	Confirmed Eruption	Tavurvur and Vulcan	4	?		1994		9		19		Historical Observations		1995		4		16		-4.271	152.203			1994	1995	2	1990	1990	1
222120	Lengai, Ol Doinyo	14024	Confirmed Eruption	North Crater	1			1994		9		18		Historical Observations		2006		7	?	16	15	-2.764	35.914			1994	2006	13	1990	1990	1
300260	Klyuchevskoy	19472	Confirmed Eruption		3			1994		9		8		Historical Observations		1995		1	>	14		56.056	160.642			1994	1995	2	1990	1990	1
284120	Ioto	18419	Confirmed Eruption	NE side	1			1994		8		22		Historical Observations		1994		8		22		24.751	141.289			1994	1994	1	1990	1990	1
264010	Batur	16204	Confirmed Eruption	Batur III	1			1994		8		7		Historical Observations		1994		8	>	14		-8.242	115.375			1994	1994	1	1990	1990	1
344040	Telica	10933	Confirmed Eruption		2			1994		7		31		Historical Observations		1994		8		12		12.606	-86.84			1994	1994	1	1990	1990	1
284130	Fukutoku-Oka-no-Ba	18459	Uncertain Eruption		0			1994		7		28				1994		7		28		24.285	141.481			1994	1994	1	1990	1990	1
284080	Sumisujima	18347	Uncertain Eruption		0			1994		7		27				1994		7		27		31.44	140.051			1994	1994	1	1990	1990	1
341040	Colima	10474	Confirmed Eruption	West of 1987 explosion crater	1			1994		7		21		Historical Observations		1994		7		21		19.514	-103.62			1994	1994	1	1990	1990	1
355100	Lascar	11870	Confirmed Eruption		2			1994		7		20		Historical Observations		1994		7		26		-23.37	-67.73			1994	1994	1	1989	1989	1
263340	Raung	16152	Confirmed Eruption		1			1994		7		14		Historical Observations		1994		7		14		-8.119	114.056			1994	1994	1	1989	1989	1
300250	Bezymianny	19369	Confirmed Eruption		2			1994		7		7		Historical Observations		1994		10		5	4	55.972	160.595			1994	1994	1	1989	1989	1
223020	Nyamulagira	14077	Confirmed Eruption	West flank (Kimera) and summit	2	?		1994		7		4		Historical Observations		1994		8	>	25		-1.408	29.2			1994	1994	1	1989	1989	1
223030	Nyiragongo	14105	Confirmed Eruption		1			1994		6		23		Historical Observations		1996		3	?	16	15	-1.52	29.25			1994	1996	3	1989	1989	1
211060	Etna	13831	Confirmed Eruption	Central Crater, NE Crater, SE Crater	3			1994		6		17		Historical Observations		2001		7		17		37.748	14.999			1994	2001	8	1989	1989	1
264030	Rinjani	16224	Confirmed Eruption	Gunung Barujari	3	?		1994		6		3		Historical Observations		1994		11		21		-8.42	116.47			1994	1994	1	1989	1989	1
311240	Cleveland	19813	Confirmed Eruption		3			1994		5		25		Historical Observations		1994		5		25		52.825	-169.944			1994	1994	1	1989	1989	1
357110	Llaima	12069	Confirmed Eruption	SE side summit crater, upper SW flank	2			1994		5		17		Historical Observations		1994		8		30		-38.692	-71.729			1994	1994	1	1989	1989	1
282110	Asosan	17347	Confirmed Eruption	Naka-dake	2			1994		5		2		Historical Observations		1995		11		16	15	32.884	131.104			1994	1995	2	1989	1989	1
351020	Ruiz, Nevado del	11291	Uncertain Eruption					1994		4		23				1994		4		23		4.892	-75.324			1994	1994	1	1989	1989	1
252120	Ulawun	15061	Confirmed Eruption		1			1994		4	?	19		Historical Observations		1994		6		16	15	-5.05	151.33			1994	1994	1	1989	1989	1
262000	Krakatau	15618	Confirmed Eruption	Anak Krakatau	2			1994		3		19		Historical Observations		1995		6	>	16	15	-6.102	105.423			1994	1995	2	1989	1989	1
345040	Poas	11187	Confirmed Eruption		2			1994		3	?	16	15	Historical Observations		1994		10	?	16	15	10.2	-84.233			1994	1994	1	1989	1989	1
241100	Ruapehu	14663	Uncertain Eruption		1			1994		2		12				1994		4		1		-39.28	175.57			1994	1994	1	1989	1989	1
263350	Ijen	16174	Confirmed Eruption	Kawah Ijen	1			1994		2		3		Historical Observations		1994		2		3		-8.058	114.242			1994	1994	1	1989	1989	1
284080	Sumisujima	18346	Uncertain Eruption		0			1994		1		17				1994		1		17		31.44	140.051			1994	1994	1	1989	1989	1
268060	Gamalama	16673	Confirmed Eruption		2			1994		1		16	15	Historical Observations		1994		10	>	15		0.8	127.33			1994	1994	1	1989	1989	1
357030	Tinguiririca	11924	Uncertain Eruption		2			1994		1		15				1994		1		15		-34.814	-70.352			1994	1994	1	1989	1989	1
311110	Kanaga	19721	Confirmed Eruption		2			1994		1		5	4	Historical Observations		1994		11		26	4	51.923	-177.168			1994	1994	1	1989	1989	1
355100	Lascar	11869	Confirmed Eruption		2			1993		12		17		Historical Observations		1994		2		27		-23.37	-67.73			1993	1994	2	1989	1989	1
353040	Alcedo	11696	Confirmed Eruption	South caldera wall	1			1993		12		5	20	Historical Observations								-0.43	-91.12			1993		0	1989	1989	1
355130	Ojos del Salado, Nevados	11883	Uncertain Eruption		1	?		1993		11		14				1993		11		14		-27.109	-68.541			1993	1993	1	1989	1989	1
251050	Long Island	14965	Confirmed Eruption	E-W fissure NNE of Motmot Island	1			1993		11	?	3		Historical Observations		1993		11		25	5	-5.358	147.12			1993	1993	1	1988	1988	1
284120	Ioto	18418	Uncertain Eruption	Asodai area and NE of Iwo-jima	1	?		1993		10	?	27				1993		11	?	16		24.751	141.289			1993	1993	1	1988	1988	1
300250	Bezymianny	19368	Confirmed Eruption		3			1993		10		21		Historical Observations		1994		2		4	4	55.972	160.595			1993	1994	2	1988	1988	1
264250	Iliwerung	16349	Confirmed Eruption	Hobal (submarine vent on SE flank)	2			1993		9		15		Historical Observations		1993		9		19		-8.53	123.57			1993	1993	1	1988	1988	1
284080	Sumisujima	18344	Uncertain Eruption		0			1993		9		8				1993		9		10		31.44	140.051			1993	1993	1	1988	1988	1
311360	Shishaldin	20091	Confirmed Eruption		2			1993		9		4		Historical Observations		1993		10		29		54.756	-163.97			1993	1993	1	1988	1988	1
272020	Kanlaon	16745	Confirmed Eruption		2			1993		8		25		Historical Observations		1993		9		3		10.412	123.132			1993	1993	1	1988	1988	1
311310	Makushin	19991	Confirmed Eruption		1			1993		8		16	15	Historical Observations		1994		1	?	19		53.891	-166.923			1993	1994	2	1988	1988	1
211060	Etna	13827	Confirmed Eruption	Central Crater, NE Crater	1			1993		8		3		Historical Observations		1993		10		13		37.748	14.999			1993	1993	1	1988	1988	1
312070	Veniaminof	20170	Confirmed Eruption	Western cone and Half Cone	2			1993		7		30		Historical Observations		1994		9	?	28		56.17	-159.38			1993	1994	2	1988	1988	1
263350	Ijen	16173	Confirmed Eruption	Kawah Ijen	1			1993		7		3		Historical Observations		1993		8		1		-8.058	114.242			1993	1993	1	1988	1988	1
331020	CoAxial Segment	20712	Confirmed Eruption	N end CoAxial segment, Juan de Fuca Ridge	0			1993		6		26		Historical Observations		1993		7	?	4		46.52	-129.58			1993	1993	1	1988	1988	1
264220	Iliboleng	16328	Confirmed Eruption		1	?		1993		6	?	16	15	Historical Observations		1993		7		16	15	-8.342	123.258			1993	1993	1	1988	1988	1
344100	Masaya	11032	Confirmed Eruption	Santiago	1			1993		6		16		Historical Observations		1994		11	>	16	15	11.985	-86.165			1993	1994	2	1988	1988	1
311180	Seguam	19782	Confirmed Eruption	Near Pyre Peak	2			1993		5		28		Historical Observations		1993		8	>	31		52.315	-172.51			1993	1993	1	1988	1988	1
268060	Gamalama	16672	Confirmed Eruption		2			1993		5		6		Historical Observations		1993		5		21		0.8	127.33			1993	1993	1	1988	1988	1
352080	Tungurahua	11642	Uncertain Eruption		1	?		1993		5		6				1993		5		6		-1.467	-78.442			1993	1993	1	1988	1988	1
243060	Tofua	14751	Uncertain Eruption	Northern part of caldera	0			1993		4		29										-19.75	-175.07			1993		0	1988	1988	1
232050	Taftan	14165	Uncertain Eruption					1993		4		25										28.6	61.13			1993		0	1988	1988	1
263340	Raung	16151	Confirmed Eruption		1			1993		4		1	90	Historical Observations								-8.119	114.056			1993		0	1988	1988	1
355160	Aracar	11884	Uncertain Eruption		2	?		1993		3		28										-24.29	-67.783			1993		0	1988	1988	1
352020	Guagua Pichincha	11494	Confirmed Eruption	1981 crater	1			1993		3		9		Historical Observations		1993		3		12		-0.171	-78.598			1993	1993	1	1987	1987	1
273083	Pinatubo	16869	Confirmed Eruption	Caldera floor	1			1993		2		16	15	Historical Observations		1993		7	?	16	15	15.13	120.35			1993	1993	1	1987	1987	1
211060	Etna	13826	Confirmed Eruption	NE Crater	1			1993		2		3		Historical Observations		1993		2		3		37.748	14.999			1993	1993	1	1987	1987	1
273030	Mayon	16807	Confirmed Eruption		2	?		1993		2		2		Historical Observations		1993		4		4		13.257	123.685			1993	1993	1	1987	1987	1
355100	Lascar	11868	Confirmed Eruption	Western crater of east summit cone	4			1993		1		30		Historical Observations		1993		8		16	15	-23.37	-67.73			1993	1993	1	1987	1987	1
341021	Socorro	10377	Confirmed Eruption	Submarine vent 3 km W of Punta Tosca	0			1993		1		29		Historical Observations		1994		2		24	4	18.78	-110.95			1993	1994	2	1987	1987	1
263200	Dieng Volcanic Complex	15789	Confirmed Eruption	Near Pandawa Lima temples	1			1993		1		23		Historical Observations		1993		1	?	23		-7.2	109.879			1993	1993	1	1987	1987	1
284170	Pagan	18520	Confirmed Eruption	North Pagan	2			1993		1		15	5	Historical Observations		1993		11	>	16	15	18.13	145.8			1993	1993	1	1987	1987	1
351080	Galeras	11374	Confirmed Eruption	Summit crater, west, SW, & south rims	2			1993		1		14		Historical Observations		1993		6		7		1.22	-77.37			1993	1993	1	1987	1987	1
252120	Ulawun	15060	Confirmed Eruption		2			1993		1		12		Historical Observations		1993		1	?	31		-5.05	151.33			1993	1993	1	1987	1987	1
234010	Heard	14408	Confirmed Eruption	Mawson Peak	2	?		1993		1		2	15	Historical Observations								-53.106	73.513			1993		0	1987	1987	1
311180	Seguam	19781	Confirmed Eruption	Pyre Peak (1.5 km south of summit)	2			1992		12		27		Historical Observations		1992		12		30		52.315	-172.51			1992	1992	1	1987	1987	1
311320	Akutan	20038	Confirmed Eruption		1			1992		12		18		Historical Observations								54.134	-165.986			1992		0	1987	1987	1
234011	McDonald Islands	14395	Confirmed Eruption	Submarine vent near McDonald Islands	0			1992		12		16	15	Historical Observations								-53.03	72.6			1992		0	1987	1987	1
284130	Fukutoku-Oka-no-Ba	18458	Confirmed Eruption		1			1992		11		10		Historical Observations		1993		9	?	9		24.285	141.481			1992	1993	2	1987	1987	1
262000	Krakatau	15617	Confirmed Eruption	Anak Krakatau	1			1992		11		7		Historical Observations		1993		10		16	15	-6.102	105.423			1992	1993	2	1987	1987	1
345040	Poas	11186	Confirmed Eruption		0			1992		10		16	15	Historical Observations		1993		9		16	15	10.2	-84.233			1992	1993	2	1987	1987	1
300260	Klyuchevskoy	19471	Confirmed Eruption		2			1992		9		12		Historical Observations		1993		9		12	1	56.056	160.642			1992	1993	2	1987	1987	1
357120	Villarrica	12171	Confirmed Eruption		1			1992		9		11		Historical Observations		1992		12	>	16	15	-39.42	-71.93			1992	1992	1	1987	1987	1
233020	Fournaise, Piton de la	14375	Confirmed Eruption	Dolomieu and upper SE flank	1			1992		8		27		Historical Observations		1992		9		23		-21.244	55.708			1992	1992	1	1987	1987	1
357110	Llaima	12068	Confirmed Eruption		1			1992		8		23		Historical Observations		1992		9		2		-38.692	-71.729			1992	1992	1	1987	1987	1
284080	Sumisujima	18343	Uncertain Eruption	Shirane (7.5 km NE of Smith Rocks)	0			1992		8		5				1992		10		7		31.44	140.051			1992	1992	1	1987	1987	1
357090	Copahue	12008	Confirmed Eruption	Agrio Crater	2			1992		7		22		Historical Observations		1993		7		2	182	-37.856	-71.183			1992	1993	2	1987	1987	1
273083	Pinatubo	16868	Confirmed Eruption	Center of caldera lake	1			1992		7	<	9		Historical Observations		1992		10		30		15.13	120.35			1992	1992	1	1986	1986	1
311300	Bogoslof	19863	Confirmed Eruption	North tip of island (NE of 1927 dome)	3			1992		7		6		Historical Observations		1992		7		24		53.93	-168.03			1992	1992	1	1986	1986	1
313040	Spurr	20399	Confirmed Eruption	South flank (Crater Peak)	4			1992		6		27		Historical Observations		1992		9		17		61.299	-152.251			1992	1992	1	1986	1986	1
272020	Kanlaon	16744	Confirmed Eruption		2			1992		6		10		Historical Observations		1992		6		10		10.412	123.132			1992	1992	1	1986	1986	1
234010	Heard	14407	Confirmed Eruption	Mawson Peak	0			1992		5	?	29		Historical Observations								-53.106	73.513			1992		0	1986	1986	1
282110	Asosan	17346	Confirmed Eruption	Naka-dake	2			1992		4		23		Historical Observations		1993		6	?	10		32.884	131.104			1992	1993	2	1986	1986	1
284170	Pagan	18519	Confirmed Eruption	North Pagan	1	?		1992		4		13		Historical Observations		1992		4		13		18.13	145.8			1992	1992	1	1986	1986	1
344070	Negro, Cerro	10965	Confirmed Eruption		3			1992		4		9		Historical Observations		1992		4		14		12.506	-86.702			1992	1992	1	1986	1986	1
267040	Awu	16569	Confirmed Eruption	SE part of summit crater	1			1992		4		7	9	Historical Observations								3.689	125.447			1992		0	1986	1986	1
300250	Bezymianny	19367	Confirmed Eruption		2			1992		3		12		Historical Observations		1992		6		12		55.972	160.595			1992	1992	1	1986	1986	1
311320	Akutan	20037	Confirmed Eruption		2			1992		3		8		Historical Observations		1992		5		21		54.134	-165.986			1992	1992	1	1986	1986	1
345040	Poas	11185	Confirmed Eruption		1			1992		2		16	15	Historical Observations		1992		3		16	15	10.2	-84.233			1992	1992	1	1986	1986	1
284131	Minami-Hiyoshi	18428	Uncertain Eruption		0			1992		2		12				1992		3		4		23.5	141.935			1992	1992	1	1986	1986	1
241100	Ruapehu	14662	Confirmed Eruption		1			1992		2		8		Historical Observations		1992		3		6		-39.28	175.57			1992	1992	1	1986	1986	1
300260	Klyuchevskoy	19470	Confirmed Eruption		2			1992		1		25		Historical Observations		1992		5	?	25		56.056	160.642			1992	1992	1	1986	1986	1
263250	Merapi	15922	Confirmed Eruption	NW of 1984 lava dome	2			1992		1		20		Historical Observations		2002		10	?	19		-7.54	110.446			1992	2002	11	1986	1986	1
234010	Heard	14406	Uncertain Eruption	Mawson Peak				1992		1		17				1992		1		18		-53.106	73.513			1992	1992	1	1986	1986	1
272020	Kanlaon	16743	Confirmed Eruption		1			1992		1		8		Historical Observations		1992		1		8		10.412	123.132			1992	1992	1	1986	1986	1
211060	Etna	13825	Confirmed Eruption	SE flank (3100-2800 m and 2400-2100 m)	2			1991		12		14		Historical Observations		1993		3		30		37.748	14.999			1991	1993	3	1986	1986	1
282090	Kirishimayama	17162	Confirmed Eruption	Shinmoe-dake	1			1991		12		1		Historical Observations		1992		4		19		31.934	130.862			1991	1992	2	1986	1986	1
334050	Northern EPR at 9.8°N	10345	Confirmed Eruption	East Pacific Rise (9.9 deg N)	0			1991		12		1	30	Historical Observations		1992		2		4	30	9.83	-104.3			1991	1992	2	1986	1986	1
311340	Westdahl	20046	Confirmed Eruption	ENE flank (1560-760 m)	3			1991		11		29		Historical Observations		1992		1		14		54.516	-164.65			1991	1992	2	1986	1986	1
284080	Sumisujima	18342	Uncertain Eruption		0			1991		11		5				1991		11		5		31.44	140.051			1991	1991	1	1986	1986	1
264220	Iliboleng	16327	Confirmed Eruption		1			1991		11		3		Historical Observations		1991		11		15		-8.342	123.258			1991	1991	1	1986	1986	1
355100	Lascar	11867	Confirmed Eruption		2			1991		10		21		Historical Observations		1992		5	?	23		-23.37	-67.73			1991	1992	2	1986	1986	1
353080	Marchena	11730	Confirmed Eruption	West to SW caldera rim	2			1991		9		25		Historical Observations		1991		11	?	16	15	0.33	-90.47			1991	1991	1	1986	1986	1
223020	Nyamulagira	14076	Confirmed Eruption	NE flank 1530 m (Mikombe)	3			1991		9		20		Historical Observations		1993		2		8		-1.408	29.2			1991	1993	3	1986	1986	1
311320	Akutan	20036	Confirmed Eruption		2			1991		9		15		Historical Observations		1991		10		29	1	54.134	-165.986			1991	1991	1	1986	1986	1
263290	Arjuno-Welirang	15962	Uncertain Eruption	Gunung Welirang				1991		9		13										-7.733	112.575			1991		0	1986	1986	1
263340	Raung	16150	Confirmed Eruption		2			1991		9		10		Historical Observations		1991		11	?	12		-8.119	114.056			1991	1991	1	1986	1986	1
357120	Villarrica	12170	Confirmed Eruption		2			1991		8		30		Historical Observations		1991		9		17		-39.42	-71.93			1991	1991	1	1986	1986	1
373030	Bardarbunga	12888	Uncertain Eruption	Loki-Fögrufjöll (East Loki cauldron)	0			1991		8		12										64.633	-17.516			1991		0	1986	1986	1
358057	Hudson, Cerro	12299	Confirmed Eruption	NW caldera rim and SW caldera floor	5	+		1991		8		8		Historical Observations		1991		10		27		-45.9	-72.97			1991	1991	1	1985	1985	1
233020	Fournaise, Piton de la	14374	Confirmed Eruption	Dolomieu and upper east flank	0			1991		7		19		Historical Observations		1991		7		20		-21.244	55.708			1991	1991	1	1985	1985	1
284130	Fukutoku-Oka-no-Ba	18457	Uncertain Eruption		0			1991		7		19				1991		10		18		24.285	141.481			1991	1991	1	1985	1985	1
233010	Karthala	14204	Confirmed Eruption	Choungou-Chahalé (Choungou-Chamadji)	2			1991		7		11		Historical Observations		1991		7		11		-11.75	43.38			1991	1991	1	1985	1985	1
241100	Ruapehu	14661	Confirmed Eruption		1			1991		7	?	5		Historical Observations		1991		7	?	14		-39.28	175.57			1991	1991	1	1985	1985	1
261030	Peuet Sague	15376	Confirmed Eruption		2			1991		7		2	182	Historical Observations								4.903	96.289			1991		0	1985	1985	1
267020	Karangetang	16535	Confirmed Eruption		2			1991		7	<	2		Historical Observations		1993		12	>	31		2.781	125.407			1991	1993	3	1985	1985	1
243070	Lateiki	14766	Confirmed Eruption		0			1991		6	<	24		Historical Observations								-19.18	-174.87			1991		0	1985	1985	1
268060	Gamalama	16671	Uncertain Eruption		1	?		1991		6		15				1991		6		15		0.8	127.33			1991	1991	1	1985	1985	1
266030	Soputan	16432	Confirmed Eruption		2			1991		5		22		Historical Observations		1996		9	>	29		1.112	124.737			1991	1996	6	1985	1985	1
266100	Lokon-Empung	16459	Confirmed Eruption	Tompaluan	3			1991		5		17		Historical Observations		1992		1		16	15	1.358	124.792			1991	1992	2	1985	1985	1
283040	Ontakesan	20963	Confirmed Eruption	1979 Crater #7	0			1991		5		13		Historical Observations		1991		5		16		35.893	137.48			1991	1991	1	1985	1985	1
264180	Lewotobi	16298	Confirmed Eruption	Lewotobi Lakilaki	1			1991		5		11		Historical Observations		1992		12	>	31		-8.542	122.775			1991	1992	2	1985	1985	1
264220	Iliboleng	16326	Confirmed Eruption		1			1991		5		8		Historical Observations		1991		6	>	30		-8.342	123.258			1991	1991	1	1985	1985	1
345020	Rincon de la Vieja	11104	Confirmed Eruption		2			1991		5		7		Historical Observations		1992		9		16	15	10.83	-85.324			1991	1992	2	1985	1985	1
255060	Kavachi	15173	Confirmed Eruption		2			1991		5	<	4		Historical Observations		1991		9		16	15	-8.991	157.979			1991	1991	1	1985	1985	1
353010	Fernandina	11674	Confirmed Eruption	Base of ESE and NW caldera wall	2	?		1991		4		19		Historical Observations		1991		4		24		-0.37	-91.55			1991	1991	1	1985	1985	1
300260	Klyuchevskoy	19469	Confirmed Eruption		2			1991		4		8		Historical Observations		1991		6	?	24		56.056	160.642			1991	1991	1	1985	1985	1
273083	Pinatubo	16867	Confirmed Eruption	Lower north flank and summit	6			1991		4		2		Historical Observations		1991		9		2		15.13	120.35			1991	1991	1	1984	1984	1
260010	Barren Island	15383	Confirmed Eruption	Central cone summit and NE flank	2			1991		4		1		Historical Observations		1991		10		31	7	12.278	93.858			1991	1991	1	1984	1984	1
264071	Ranakah	16255	Confirmed Eruption	Anak Ranakah	1			1991		3	<	16	15	Historical Observations								-8.62	120.52			1991		0	1984	1984	1
334050	Northern EPR at 9.8°N	10344	Confirmed Eruption	East Pacific Rise (9.8 deg N)	0			1991		3	?	16	15	Historical Observations								9.83	-104.3			1991		0	1984	1984	1
335020	Hollister Ridge	10363	Uncertain Eruption	Seamount by Pacific-Antarctic Ridge?	0			1991		3		11				1991		3		19		-53.998	-139.845			1991	1991	1	1984	1984	1
345040	Poas	11184	Confirmed Eruption		1			1991		3		6		Historical Observations		1991		9		16	15	10.2	-84.233			1991	1991	1	1984	1984	1
341040	Colima	10473	Confirmed Eruption		2			1991		3		1		Historical Observations		1991		10		16	15	19.514	-103.62			1991	1991	1	1984	1984	1
272020	Kanlaon	16742	Confirmed Eruption		2			1991		2		14		Historical Observations		1991		2		14		10.412	123.132			1991	1991	1	1984	1984	1
357040	Planchon-Peteroa	11945	Confirmed Eruption	Peteroa	2			1991		2		9		Historical Observations		1991		3		2	2	-35.223	-70.568			1991	1991	1	1984	1984	1
372070	Hekla	12753	Confirmed Eruption	Summit, SW, SE & NE flank fissures	3			1991		1		17		Historical Observations		1991		3		11		63.983	-19.666			1991	1991	1	1984	1984	1
290380	Ebeko	18876	Confirmed Eruption	Northern crater	1			1991		1		16	15	Historical Observations		1991		1		16	15	50.686	156.014			1991	1991	1	1984	1984	1
300100	Avachinsky	19103	Confirmed Eruption		2			1991		1		13		Historical Observations		1991		1		30		53.256	158.836			1991	1991	1	1984	1984	1
261170	Kerinci	15521	Confirmed Eruption		2			1990		12		31	365	Historical Observations								-1.697	101.264			1990		0	1984	1984	1
355100	Lascar	11866	Confirmed Eruption		1			1990		11		24		Historical Observations		1990		11		24		-23.37	-67.73			1990	1990	1	1984	1984	1
282100	Unzendake	17181	Confirmed Eruption	Fugen-dake	1			1990		11		17		Historical Observations		1995		2		16	15	32.761	130.299			1990	1995	6	1984	1984	1
321050	St. Helens	20559	Confirmed Eruption	North side of lava dome	3	?		1990		11		5		Historical Observations		1991		2		14		46.2	-122.18			1990	1991	2	1984	1984	1
335030	Udintsev Transform	10364	Uncertain Eruption	Udinstev Fracture Zone	0			1990		10		29				1990		11		19		-56.153	-143.373			1990	1990	1	1984	1984	1
343010	Apaneca Range	19890	Discredited Eruption					1990		10		13										13.872	-89.742			1990		0	1984	1984	1
284010	Izu-Oshima	18244	Confirmed Eruption	Mihara-yama (1987 summit crater)	2			1990		10		4		Historical Observations		1990		10		4		34.724	139.394			1990	1990	1	1984	1984	1
257040	Ambrym	15289	Confirmed Eruption	Mbwelesu, Niri Mbwelesu, Niri Taten	2			1990		9	<	16	15	Historical Observations		1991		7	>	16	15	-16.25	168.12			1990	1991	2	1984	1984	1
311320	Akutan	20035	Confirmed Eruption		2			1990		9		6		Historical Observations		1990		10		1		54.134	-165.986			1990	1990	1	1984	1984	1
283110	Asamayama	17808	Confirmed Eruption		2			1990		7		20		Historical Observations		1990		7		20		36.406	138.523			1990	1990	1	1984	1984	1
334120	Southern EPR-Segment K	10357	Confirmed Eruption		0			1990	2	7		2	182	Historical Observations								-17.436	-113.206			1990		0	1984	1984	1
357150	Puyehue-Cordon Caulle	12216	Confirmed Eruption	Cordón Caulle	1			1990		7		2	182	Historical Observations								-40.59	-72.117			1990		0	1984	1984	1
241100	Ruapehu	14660	Confirmed Eruption		0			1990		6		17		Historical Observations		1990		9	<	8		-39.28	175.57			1990	1990	1	1983	1983	1
311020	Kiska	19667	Confirmed Eruption	Upper NW? flank	2			1990		6		1		Historical Observations		1990		6	?	1		52.103	177.602			1990	1990	1	1983	1983	1
242050	Monowai	14712	Confirmed Eruption		0			1990		5		30		Hydrophonic		1991		3		25		-25.887	-177.188			1990	1991	2	1983	1983	1
354006	Sabancaya	11750	Confirmed Eruption		3			1990		5		28		Historical Observations		1998		9	?	16	15	-15.787	-71.857			1990	1998	9	1983	1983	1
268060	Gamalama	16670	Confirmed Eruption		3	?		1990		4		25		Historical Observations		1990		4		26		0.8	127.33			1990	1990	1	1983	1983	1
355107	Pular	11843	Uncertain Eruption		1	?		1990		4		24				1990		4		24		-24.188	-68.054			1990	1990	1	1983	1983	1
352020	Guagua Pichincha	11493	Confirmed Eruption	1981 crater	1			1990		4		16		Historical Observations		1990		5		10		-0.171	-78.598			1990	1990	1	1983	1983	1
282030	Suwanosejima	16941	Confirmed Eruption	O-take	2			1990		4		16	15	Historical Observations		1996		7		14		29.638	129.714			1990	1996	7	1983	1983	1
360160	Kick 'em Jenny	12467	Confirmed Eruption		0			1990		3		26		Hydrophonic		1990		3		28		12.3	-61.64			1990	1990	1	1983	1983	1
312030	Pavlof	20150	Confirmed Eruption		2	?		1990		3		5		Historical Observations		1990		3		5		55.417	-161.894			1990	1990	1	1983	1983	1
357110	Llaima	12067	Confirmed Eruption		1			1990		2		25		Historical Observations		1990		11		25		-38.692	-71.729			1990	1990	1	1983	1983	1
263280	Kelut	15957	Confirmed Eruption		4			1990		2		10		Historical Observations		1990		3		13	45	-7.93	112.308			1990	1990	1	1983	1983	1
300250	Bezymianny	19366	Confirmed Eruption		3			1990		1		29		Historical Observations		1991		11		29		55.972	160.595			1990	1991	2	1983	1983	1
264180	Lewotobi	16297	Confirmed Eruption	Lewotabi Lakilaki	1			1990		1		28		Historical Observations		1990		6		16	15	-8.542	122.775			1990	1990	1	1983	1983	1
311320	Akutan	20034	Confirmed Eruption		2			1990		1		26	5	Historical Observations		1990		1		26	5	54.134	-165.986			1990	1990	1	1983	1983	1
233020	Fournaise, Piton de la	14373	Confirmed Eruption	Dolomieu and SE flank	0			1990		1		18		Historical Observations		1990		5		8		-21.244	55.708			1990	1990	1	1983	1983	1
263340	Raung	16149	Confirmed Eruption		2			1990		1	<	16		Historical Observations		1990		12	>	16	15	-8.119	114.056			1990	1990	1	1983	1983	1
300270	Sheveluch	19585	Confirmed Eruption		3			1990		1		10		Historical Observations		1995		2		16	15	56.653	161.36			1990	1995	6	1983	1983	1
241100	Ruapehu	14659	Confirmed Eruption		1			1990		1		7		Historical Observations		1990		1		26		-39.28	175.57			1990	1990	1	1983	1983	1
351080	Galeras	11373	Confirmed Eruption		2			1990		1		7		Historical Observations		1992		7		16		1.22	-77.37			1990	1992	3	1983	1983	1
342110	Pacaya	10762	Confirmed Eruption	MacKenney Crater and flank vents	3			1990		1	?	4		Historical Observations		2000		3		1		14.382	-90.601			1990	2000	11	1983	1983	1
355040	Irruputuncu	11827	Uncertain Eruption					1989		12		16	15									-20.73	-68.55			1989		0	1983	1983	1
211060	Etna	13821	Confirmed Eruption	SE and NE Craters	3			1989		12		16		Historical Observations		1992		5		23		37.748	14.999			1989	1992	4	1983	1983	1
313030	Redoubt	20390	Confirmed Eruption	North end of summit crater (2470 m)	3			1989		12		14		Historical Observations		1990		6	?	20		60.485	-152.742			1989	1990	2	1982	1982	1
321050	St. Helens	20558	Confirmed Eruption	North side of lava dome	2			1989		12		7		Historical Observations		1990		1		6		46.2	-122.18			1989	1990	2	1982	1982	1
311240	Cleveland	19812	Uncertain Eruption		0			1989		10		25	3									52.825	-169.944			1989		0	1982	1982	1
272020	Kanlaon	16741	Confirmed Eruption		2			1989		10		25		Historical Observations		1989		12	>	13		10.412	123.132			1989	1989	1	1982	1982	1
284142	Supply Reef	18477	Confirmed Eruption	Volcano Uncertain: NW of Supply Reef (~20.3 N, 144.9E)	0			1989		9		21		Hydrophonic		1989		12		27		20.13	145.1			1989	1989	1	1982	1982	1
211060	Etna	13820	Confirmed Eruption	SE Crater, SE and NE flanks	2			1989		9		11		Historical Observations		1989		10		9		37.748	14.999			1989	1989	1	1982	1982	1
311070	Gareloi	19688	Confirmed Eruption		1			1989		8		17		Historical Observations								51.79	-178.794			1989		0	1982	1982	1
256010	Tinakula	15203	Confirmed Eruption		1			1989		8	<	16	15	Historical Observations		1990		2	>	16	15	-10.386	165.804			1989	1990	2	1982	1982	1
300250	Bezymianny	19365	Confirmed Eruption		2			1989		8		1		Historical Observations		1989		8		4		55.972	160.595			1989	1989	1	1982	1982	1
284080	Sumisujima	18341	Uncertain Eruption		0			1989		7		18				1989		7		18		31.44	140.051			1989	1989	1	1982	1982	1
284110	Kita-Ioto	18385	Uncertain Eruption	Funka-Asane	0			1989		7		16	15			1989		7		16	15	25.424	141.284			1989	1989	1	1982	1982	1
267020	Karangetang	16534	Confirmed Eruption		1			1989		7		16	15	Historical Observations		1989		7		16	15	2.781	125.407			1989	1989	1	1982	1982	1
283010	Izu-Tobu	17379	Confirmed Eruption	Teishi-kaikyu (4 km NE of Ito City)	1			1989		7		13		Historical Observations		1989		7		13		34.9	139.098			1989	1989	1	1982	1982	1
241100	Ruapehu	14658	Confirmed Eruption		1			1989		7		1		Historical Observations		1989		9	?	20		-39.28	175.57			1989	1989	1	1982	1982	1
224010	Cameroon	14133	Confirmed Eruption	NE flank (2860 m)	1	?		1989		5		29		Historical Observations		1989		5		29		4.203	9.17			1989	1989	1	1982	1982	1
290070	Etorofu-Yakeyama [Grozny Group]	18754	Confirmed Eruption	Ivan Grozny	2			1989		5		3		Historical Observations		1989		8		5	4	45.012	147.871			1989	1989	1	1982	1982	1
223020	Nyamulagira	14075	Confirmed Eruption	Summit, SE and East flank	3			1989		4		24		Historical Observations		1989		8		15	5	-1.408	29.2			1989	1989	1	1982	1982	1
257040	Ambrym	15288	Confirmed Eruption	Marum, Benbow, Niri Mbwelesu Taten	2			1989		4		24		Historical Observations		1989		12		23		-16.25	168.12			1989	1989	1	1982	1982	1
266030	Soputan	16431	Confirmed Eruption		2			1989		4		22		Historical Observations		1989		4		23		1.112	124.737			1989	1989	1	1982	1982	1
283090	Niigata-Yakeyama	17549	Confirmed Eruption	Upper East flank	1			1989		4		19		Historical Observations		1989		4		26		36.921	138.036			1989	1989	1	1982	1982	1
300270	Sheveluch	19567	Confirmed Eruption		2			1989		4		7		Historical Observations		1989		6		26		56.653	161.36			1989	1989	1	1982	1982	1
282110	Asosan	17345	Confirmed Eruption	Naka-dake	2			1989		4		5		Historical Observations		1991		2		9		32.884	131.104			1989	1991	3	1982	1982	1
311320	Akutan	20033	Confirmed Eruption		2			1989		2		27		Historical Observations		1989		3	<	28		54.134	-165.986			1989	1989	1	1982	1982	1
344100	Masaya	11031	Confirmed Eruption	Santiago	1			1989		2		20		Historical Observations		1989		11		16	15	11.985	-86.165			1989	1989	1	1982	1982	1
351080	Galeras	11372	Confirmed Eruption	El Pinta vent	2			1989		2		19		Historical Observations		1989		5		9		1.22	-77.37			1989	1989	1	1982	1982	1
290380	Ebeko	18875	Confirmed Eruption	Northern crater and upper east flank	2			1989		2		2		Historical Observations		1990		4		15	5	50.686	156.014			1989	1990	2	1982	1982	1
390090	Saunders	22332	Confirmed Eruption		0			1989		1		30		Historical Observations		1990		3		22		-57.8	-26.483			1989	1990	2	1982	1982	1
284080	Sumisujima	18340	Uncertain Eruption		0			1989		1		18				1989		1		18		31.44	140.051			1989	1989	1	1982	1982	1
290240	Sarychev Peak	18818	Confirmed Eruption		1	?		1989		1		13		Historical Observations		1989		1		14		48.092	153.2			1989	1989	1	1982	1982	1
283120	Kusatsu-Shiranesan	17845	Uncertain Eruption	NW part of Yu-gama	1			1989		1		6				1989		1		6		36.618	138.528			1989	1989	1	1982	1982	1
252120	Ulawun	15059	Confirmed Eruption		2			1989		1		1		Historical Observations		1989		12	?	16	15	-5.05	151.33			1989	1989	1	1981	1981	1
360160	Kick 'em Jenny	12466	Confirmed Eruption		0			1988		12		29		Hydrophonic		1988		12		30		12.3	-61.64			1988	1988	1	1981	1981	1
357100	Lonquimay	12016	Confirmed Eruption	NE flank (Navidad Crater)	3			1988		12		25		Historical Observations		1990		1		24	1	-38.379	-71.586			1988	1990	3	1981	1981	1
285050	Tokachidake	18660	Confirmed Eruption	1962 Crater	2			1988		12	?	10		Historical Observations		1989		5		16	15	43.418	142.686			1988	1989	2	1981	1981	1
241100	Ruapehu	14657	Confirmed Eruption		1			1988		12		8		Historical Observations		1989		3	?	5		-39.28	175.57			1988	1989	2	1981	1981	1
300270	Sheveluch	19584	Confirmed Eruption		2	?		1988		12		7		Historical Observations		1988		12		7		56.653	161.36			1988	1988	1	1981	1981	1
211060	Etna	13819	Confirmed Eruption	SE Crater	1			1988		10		2		Historical Observations		1989		6		30		37.748	14.999			1988	1989	2	1981	1981	1
353010	Fernandina	11673	Confirmed Eruption	East caldera wall	2	?		1988		9		14		Historical Observations		1988		9		16		-0.37	-91.55			1988	1988	1	1981	1981	1
242050	Monowai	14711	Confirmed Eruption		0			1988		9		8		Hydrophonic		1988		9		8		-25.887	-177.188			1988	1988	1	1981	1981	1
284170	Pagan	18518	Confirmed Eruption	North Pagan	2			1988		8		24		Historical Observations		1988		10		12		18.13	145.8			1988	1988	1	1981	1981	1
257060	Epi	13375	Uncertain Eruption		0			1988		8		16	15									-16.68	168.37			1988		0	1981	1981	1
268070	Makian	16689	Confirmed Eruption		3			1988		7		29		Historical Observations		1988		8		5		0.32	127.4			1988	1988	1	1981	1981	1
263180	Slamet	15762	Confirmed Eruption		1			1988		7		12		Historical Observations		1988		7		13		-7.242	109.208			1988	1988	1	1981	1981	1
334050	Northern EPR at 9.8°N	10340	Confirmed Eruption	East Pacific Rise (9.3 deg N)	0			1988	1	7		2	182	Historical Observations								9.83	-104.3			1988		0	1981	1981	1
354006	Sabancaya	11749	Confirmed Eruption		1			1988		6		22		Historical Observations		1988		10	?	16	15	-15.787	-71.857			1988	1988	1	1981	1981	1
272020	Kanlaon	16740	Confirmed Eruption		1			1988		6		21		Historical Observations		1988		7		2		10.412	123.132			1988	1988	1	1981	1981	1
344120	Concepcion	11071	Confirmed Eruption		2			1988		6		16	15	Historical Observations								11.538	-85.622			1988		0	1981	1981	1
341040	Colima	10472	Uncertain Eruption		2	?		1988		6		15	180									19.514	-103.62			1988		0	1981	1981	1
243040	Hunga Tonga-Hunga Ha'apai	14732	Confirmed Eruption	1 km SSE of Hunga Ha'apai	0			1988		6		1		Historical Observations		1988		6	>	3		-20.536	-175.382			1988	1988	1	1981	1981	1
282110	Asosan	17344	Confirmed Eruption	Naka-dake	1			1988		5		26	5	Historical Observations		1989		1		16	15	32.884	131.104			1988	1989	2	1981	1981	1
265090	Banda Api	16420	Confirmed Eruption	Summit, north and south flanks	3	?		1988		5		9		Historical Observations		1988		5		17		-4.523	129.881			1988	1988	1	1981	1981	1
266100	Lokon-Empung	16458	Confirmed Eruption	Tompaluan	1			1988		4		21		Historical Observations		1988		5		1		1.358	124.792			1988	1988	1	1981	1981	1
311320	Akutan	20032	Confirmed Eruption		2			1988		3		26		Historical Observations		1988		7		20		54.134	-165.986			1988	1988	1	1981	1981	1
241100	Ruapehu	14656	Confirmed Eruption		1			1988		3		20		Historical Observations		1988		5		25	3	-39.28	175.57			1988	1988	1	1981	1981	1
284070	Myojinsho	18331	Uncertain Eruption	Myojinsho	0			1988		3		18				1988		3		19		31.888	139.918			1988	1988	1	1980	1980	1
273010	Bulusan	16768	Confirmed Eruption		2			1988		2		20		Historical Observations		1988		3		8		12.769	124.056			1988	1988	1	1980	1980	1
284170	Pagan	18517	Uncertain Eruption	North Pagan				1988		2		16										18.13	145.8			1988		0	1980	1980	1
262000	Krakatau	15616	Confirmed Eruption	Anak Krakatau (S flank 1960-81 cone)	2			1988		2		14	5	Historical Observations		1988		4	?	16	15	-6.102	105.423			1988	1988	1	1980	1980	1
268060	Gamalama	16669	Confirmed Eruption		2			1988		2		12		Historical Observations		1988		3	?	16	15	0.8	127.33			1988	1988	1	1980	1980	1
257040	Ambrym	15287	Confirmed Eruption	Benbow, Mbwelesu, Marum, Niri Taten	3			1988		2	?	12		Historical Observations		1988		8		23		-16.25	168.12			1988	1988	1	1980	1980	1
284121	Kita-Fukutokutai	18400	Uncertain Eruption		1	?		1988		1		27										24.417	141.417			1988		0	1980	1980	1
282060	Kikai	16996	Confirmed Eruption	Iwo-dake	1			1988		1		18		Historical Observations		1988		1		18		30.793	130.305			1988	1988	1	1980	1980	1
282030	Suwanosejima	16940	Confirmed Eruption	O-take	2			1988		1		16	15	Historical Observations		1989		12		16	15	29.638	129.714			1988	1989	2	1980	1980	1
285070	Akan	18701	Confirmed Eruption	Me-Akan (SE rim of Ponmachineshiri)	1			1988		1		5		Historical Observations		1988		2	?	18		43.384	144.013			1988	1988	1	1980	1980	1
223020	Nyamulagira	14074	Confirmed Eruption	North Flank (Gafuranindi)	1			1987		12		30		Historical Observations		1988		1		4		-1.408	29.2			1987	1988	2	1980	1980	1
264071	Ranakah	16254	Confirmed Eruption	Anak Ranakah	3			1987		12		28		Historical Observations		1989		4	>	16	15	-8.62	120.52			1987	1989	3	1980	1980	1
357010	Tupungatito	11899	Confirmed Eruption		2			1987		11		28		Historical Observations		1987		11		30		-33.425	-69.797			1987	1987	1	1980	1980	1
355100	Lascar	11865	Confirmed Eruption	Western crater of east summit cone	3			1987		11	<	16	15	Historical Observations		1990		4		6		-23.37	-67.73			1987	1990	4	1980	1980	1
344040	Telica	10932	Confirmed Eruption	Vent in NE corner of crater	1			1987		11		16	15	Historical Observations		1987		11		16	15	12.606	-86.84			1987	1987	1	1980	1980	1
344020	San Cristobal	10885	Uncertain Eruption					1987		11		16	15									12.702	-87.004			1987		0	1980	1980	1
284010	Izu-Oshima	18243	Confirmed Eruption	Mihara-yama	2			1987		11		16		Historical Observations		1988		1		27		34.724	139.394			1987	1988	2	1980	1980	1
311230	Carlisle	19800	Uncertain Eruption					1987		11		16										52.894	-170.054			1987		0	1980	1980	1
284070	Myojinsho	18330	Uncertain Eruption	Myojinsho	0			1987		10		21				1987		12		9		31.888	139.918			1987	1987	1	1980	1980	1
290380	Ebeko	18874	Confirmed Eruption	Northern crater	1			1987		10		14		Historical Observations		1988		1		16	15	50.686	156.014			1987	1988	2	1980	1980	1
264220	Iliboleng	16325	Confirmed Eruption		2			1987		10		2		Historical Observations		1987		10		2		-8.342	123.258			1987	1987	1	1980	1980	1
284130	Fukutoku-Oka-no-Ba	17603	Uncertain Eruption		0			1987		9		4				1991		2		6		24.285	141.481			1987	1991	5	1980	1980	1
284170	Pagan	18516	Confirmed Eruption	North Pagan	1			1987		9		4		Historical Observations		1987		9		4		18.13	145.8			1987	1987	1	1980	1980	1
311190	Amukta	19788	Confirmed Eruption		1			1987		9	?	4		Historical Observations								52.5	-171.252			1987		0	1980	1980	1
311070	Gareloi	19687	Confirmed Eruption		1	?		1987		9		4		Historical Observations								51.79	-178.794			1987		0	1980	1980	1
241100	Ruapehu	14655	Confirmed Eruption		1			1987		8		24		Historical Observations		1987		8		30		-39.28	175.57			1987	1987	1	1980	1980	1
284110	Kita-Ioto	18384	Uncertain Eruption	Funka-Asane	0			1987		8		16	15			1987		8		16	15	25.424	141.284			1987	1987	1	1980	1980	1
354006	Sabancaya	11748	Uncertain Eruption		2	?		1987		8		7										-15.787	-71.857			1987		0	1980	1980	1
390030	Deception Island	13197	Uncertain Eruption					1987		7		23										-63.001	-60.652			1987		0	1980	1980	1
284130	Fukutoku-Oka-no-Ba	17602	Confirmed Eruption		0			1987		7		14		Historical Observations		1987		8	?	30		24.285	141.481			1987	1987	1	1980	1980	1
341040	Colima	10471	Confirmed Eruption	East side of summit lava dome	1			1987		7		2		Historical Observations		1987		7		2		19.514	-103.62			1987	1987	1	1980	1980	1
311240	Cleveland	19811	Confirmed Eruption		3			1987		6		19		Historical Observations		1987		8		28		52.825	-169.944			1987	1987	1	1979	1979	1
345040	Poas	11183	Confirmed Eruption		2			1987		6		16	15	Historical Observations		1990		6		16	15	10.2	-84.233			1987	1990	4	1979	1979	1
333060	Macdonald	10323	Confirmed Eruption		0			1987		6		4		Historical Observations		1989		1	>	28		-28.98	-140.25			1987	1989	3	1979	1979	1
284210	Esmeralda Bank	18545	Uncertain Eruption		0			1987		5		26										15	145.25			1987		0	1979	1979	1
263340	Raung	16148	Confirmed Eruption		1			1987		5		16	15	Historical Observations		1989		7		28	3	-8.119	114.056			1987	1989	3	1979	1979	1
283090	Niigata-Yakeyama	17548	Confirmed Eruption		1			1987		4		25	5	Historical Observations								36.921	138.036			1987		0	1979	1979	1
311020	Kiska	19666	Uncertain Eruption					1987		4		15										52.103	177.602			1987		0	1979	1979	1
311060	Semisopochnoi	19673	Confirmed Eruption	Sugarloaf ?	2	?		1987		4		13		Historical Observations								51.93	179.58			1987		0	1979	1979	1
268040	Gamkonora	16594	Confirmed Eruption		1			1987		4		13		Historical Observations		1987		4		26		1.38	127.53			1987	1987	1	1979	1979	1
345020	Rincon de la Vieja	11103	Confirmed Eruption		1			1987		4		1		Historical Observations		1987		4		1		10.83	-85.324			1987	1987	1	1979	1979	1
272020	Kanlaon	16739	Confirmed Eruption		1			1987		3	?	30		Historical Observations		1987		7		2		10.412	123.132			1987	1987	1	1979	1979	1
242030	Raoul Island	14701	Uncertain Eruption	NNE flank (7 km from Raoul Island)	0			1987		3		25				1987		3		25		-29.27	-177.92			1987	1987	1	1979	1979	1
312070	Veniaminof	20169	Confirmed Eruption	Western intracaldera cone	1			1987		3		19		Historical Observations		1987		3		19		56.17	-159.38			1987	1987	1	1979	1979	1
313020	Iliamna	20289	Discredited Eruption					1987		3		19				1987		5		2		60.032	-153.09			1987	1987	1	1979	1979	1
311120	Great Sitkin	19740	Uncertain Eruption					1987		3		18										52.076	-176.13			1987		0	1979	1979	1
312060	Kupreanof	20155	Uncertain Eruption	SSW flank (1575 m)	1			1987		3		10		Historical Observations		1987		3		10		56.011	-159.797			1987	1987	1	1979	1979	1
211060	Etna	13818	Confirmed Eruption	NE and SE Craters	2			1987		3		8	8	Historical Observations		1987		5		16		37.748	14.999			1987	1987	1	1979	1979	1
311161	Korovin	19762	Confirmed Eruption		2			1987		3	?	4		Historical Observations		1987		3	?	19		52.381	-174.166			1987	1987	1	1979	1979	1
311310	Makushin	19990	Confirmed Eruption		1			1987		3		2		Historical Observations		1987		3		2		53.891	-166.923			1987	1987	1	1978	1978	1
344100	Masaya	11030	Confirmed Eruption	Santiago	1			1987		2		15		Historical Observations		1987		2	>	22		11.985	-86.165			1987	1987	1	1978	1978	1
311320	Akutan	20031	Confirmed Eruption		2			1987		1		31		Historical Observations		1987		6		24		54.134	-165.986			1987	1987	1	1978	1978	1
261140	Marapi	15475	Confirmed Eruption	Verbeek Crater	2			1987		1		15		Historical Observations		1994		8	>	12		-0.38	100.474			1987	1994	8	1978	1978	1
342090	Fuego	10731	Confirmed Eruption		1			1987		1		5	4	Historical Observations		1987		2	?	16	15	14.473	-90.88			1987	1987	1	1978	1978	1
345020	Rincon de la Vieja	11102	Confirmed Eruption		1			1986		12		31		Historical Observations		1986		12		31		10.83	-85.324			1986	1986	1	1978	1978	1
354006	Sabancaya	11747	Confirmed Eruption		1			1986		12		16	15	Historical Observations								-15.787	-71.857			1986		0	1978	1978	1
300250	Bezymianny	19364	Confirmed Eruption		3			1986		12		5	4	Historical Observations		1988		7		26	5	55.972	160.595			1986	1988	3	1978	1978	1
373030	Bardarbunga	12887	Uncertain Eruption	Loki-Fögrufjöll (East Loki cauldron)	0			1986		11		29				1986		12	?	1		64.633	-17.516			1986	1986	1	1978	1978	1
300260	Klyuchevskoy	19468	Confirmed Eruption	Summit, SE, SW, NE and east flanks	4			1986		11		27		Historical Observations		1990		9		16	15	56.056	160.642			1986	1990	5	1978	1978	1
311290	Okmok	19850	Confirmed Eruption	SW part of caldera (Cone A)	2			1986		11		18		Historical Observations		1988		2		26		53.43	-168.13			1986	1988	3	1978	1978	1
290360	Chikurachki	18854	Confirmed Eruption		4			1986		11		18		Historical Observations		1986		12		7		50.324	155.461			1986	1986	1	1978	1978	1
284010	Izu-Oshima	18242	Confirmed Eruption	Mihara-yama, N part and NW of caldera	3			1986		11		15		Historical Observations		1986		12		18		34.724	139.394			1986	1986	1	1978	1978	1
257040	Ambrym	15286	Confirmed Eruption	New cone 3 km east of Marum	2			1986		11		13		Historical Observations		1986		11	?	19		-16.25	168.12			1986	1986	1	1978	1978	1
211060	Etna	13817	Confirmed Eruption	Valle del Bove (3050-2180 m)	2			1986		10		30		Historical Observations		1987		3		1		37.748	14.999			1986	1987	2	1978	1978	1
284070	Myojinsho	18329	Uncertain Eruption	Myojinsho	0			1986		10		24				1986		10		24		31.888	139.918			1986	1986	1	1978	1978	1
290260	Chirinkotan	18829	Confirmed Eruption		1			1986		10		11		Historical Observations		1986		10		12		48.98	153.48			1986	1986	1	1978	1978	1
263250	Merapi	15917	Confirmed Eruption		2			1986		10		10		Historical Observations		1990		8	?	16	15	-7.54	110.446			1986	1990	5	1978	1978	1
332000	Loihi	20731	Uncertain Eruption		0			1986		9		20				1986		9		20		18.92	-155.27			1986	1986	1	1978	1978	1
355100	Lascar	11864	Confirmed Eruption	Western crater of east summit cone	3			1986		9		14		Historical Observations		1986		9		16		-23.37	-67.73			1986	1986	1	1978	1978	1
290240	Sarychev Peak	18817	Confirmed Eruption		1			1986		9	?	1	15	Historical Observations								48.092	153.2			1986		0	1978	1978	1
224030	Oku Volcanic Field	14138	Uncertain Eruption	Lake Nyos				1986		8		21				1986		12	?	30		6.25	10.5			1986	1986	1	1978	1978	1
331030	Cleft Segment	20719	Confirmed Eruption	N Cleft Segment, S Juan de Fuca Ridge	0			1986		8	?	16	15	Historical Observations								44.83	-130.3			1986		0	1978	1978	1
263200	Dieng Volcanic Complex	15788	Confirmed Eruption	Sileri Crater	1			1986		8		6		Historical Observations		1986		8		6		-7.2	109.879			1986	1986	1	1977	1977	1
261160	Talang	15493	Uncertain Eruption	NE flank (Panjang Crater)	1			1986		7		16				1986		10		13		-0.979	100.681			1986	1986	1	1977	1977	1
223020	Nyamulagira	14073	Confirmed Eruption	South flank (near Kitazungurwa)	2			1986		7		16		Historical Observations		1986		8		20		-1.408	29.2			1986	1986	1	1977	1977	1
255060	Kavachi	15172	Confirmed Eruption		1			1986		7		5		Historical Observations		1986		7		23		-8.991	157.979			1986	1986	1	1977	1977	1
261120	Sorikmarapi	15414	Confirmed Eruption		1			1986		7		5		Historical Observations		1986		7		14		0.686	99.539			1986	1986	1	1977	1977	1
261030	Peuet Sague	15375	Confirmed Eruption		2			1986		7		2	182	Historical Observations								4.903	96.289			1986		0	1977	1977	1
331020	CoAxial Segment	20711	Confirmed Eruption	CoAxial segment, Juan de Fuca Ridge	0			1986	5	7		2	182	Historical Observations								46.52	-129.58			1986		0	1977	1977	1
284096	Nishinoshima	18365	Uncertain Eruption		0			1986		7		2	182			1990		7		2	182	27.247	140.874			1986	1990	5	1977	1977	1
284100	Kaitoku Seamount	18376	Uncertain Eruption		0			1986		6		18				1986		6		18		26.127	141.102			1986	1986	1	1977	1977	1
242050	Monowai	14710	Confirmed Eruption		0			1986		6		16	15	Hydrophonic		1986		6		16	15	-25.887	-177.188			1986	1986	1	1977	1977	1
241130	Rumble III	14675	Confirmed Eruption		0			1986		6		15		Hydrophonic		1986		8	?	5		-35.745	178.478			1986	1986	1	1977	1977	1
300260	Klyuchevskoy	19467	Confirmed Eruption		2			1986		6		8		Historical Observations		1986		7		11		56.056	160.642			1986	1986	1	1977	1977	1
272020	Kanlaon	16738	Confirmed Eruption		2			1986		6		3		Historical Observations		1986		8		18		10.412	123.132			1986	1986	1	1977	1977	1
264220	Iliboleng	16324	Confirmed Eruption		1			1986		5		28		Historical Observations		1986		11		24		-8.342	123.258			1986	1986	1	1977	1977	1
290390	Alaid	18890	Confirmed Eruption		2	?		1986		5		25		Historical Observations		1986		5		28	3	50.861	155.565			1986	1986	1	1977	1977	1
311161	Korovin	19759	Uncertain Eruption		1			1986		5		23										52.381	-174.166			1986		0	1977	1977	1
333060	Macdonald	10322	Confirmed Eruption		0			1986		5		16		Hydrophonic		1986		8		2		-28.98	-140.25			1986	1986	1	1977	1977	1
311310	Makushin	19989	Discredited Eruption					1986		4		28										53.891	-166.923			1986		0	1977	1977	1
311240	Cleveland	19810	Confirmed Eruption		2			1986		4		28		Historical Observations		1986		5	>	27		52.825	-169.944			1986	1986	1	1977	1977	1
312030	Pavlof	20149	Confirmed Eruption	NNE & SE summit vents, NE & SE flanks	3			1986		4		16		Historical Observations		1988		8		13		55.417	-161.894			1986	1988	3	1977	1977	1
284130	Fukutoku-Oka-no-Ba	17601	Uncertain Eruption		0			1986		4		7				1987		6		26		24.285	141.481			1986	1987	2	1977	1977	1
300270	Sheveluch	19583	Confirmed Eruption		3			1986		3		28		Historical Observations		1988		2		28		56.653	161.36			1986	1988	3	1977	1977	1
313010	Augustine	20262	Confirmed Eruption		4	?		1986		3		27		Historical Observations		1986		8		31		59.363	-153.43			1986	1986	1	1977	1977	1
300250	Bezymianny	19363	Confirmed Eruption		2			1986		3		26	5	Historical Observations		1986		6		29		55.972	160.595			1986	1986	1	1977	1977	1
266100	Lokon-Empung	16457	Confirmed Eruption	Tompaluan	2			1986		3		22		Historical Observations		1987		5		13		1.358	124.792			1986	1987	2	1977	1977	1
311360	Shishaldin	20090	Confirmed Eruption		2			1986		3		19		Historical Observations		1987		2	?	15		54.756	-163.97			1986	1987	2	1977	1977	1
311320	Akutan	20030	Confirmed Eruption		2			1986		3		18		Historical Observations		1986		6		30		54.134	-165.986			1986	1986	1	1977	1977	1
211060	Etna	13816	Confirmed Eruption	SE Crater	2	?		1986		3		16	15	Historical Observations		1986		10	?	31		37.748	14.999			1986	1986	1	1977	1977	1
341130	Tacana	10621	Confirmed Eruption	NE flank (ca. 3600 m)	1			1986		2		16	15	Historical Observations		1986		6		16	15	15.132	-92.109			1986	1986	1	1976	1976	1
241100	Ruapehu	14654	Confirmed Eruption		1			1986		2		8		Historical Observations		1986		2	?	9		-39.28	175.57			1986	1986	1	1976	1976	1
241040	Whakaari/White Island	14490	Confirmed Eruption	Congress and numerous other craters	3			1986		2	?	1		Historical Observations		1994		7		28		-37.52	177.18			1986	1994	9	1976	1976	1
357010	Tupungatito	11898	Confirmed Eruption	NW craters	1			1986		1		20		Historical Observations		1986		1		20		-33.425	-69.797			1986	1986	1	1976	1976	1
284130	Fukutoku-Oka-no-Ba	17600	Confirmed Eruption		2			1986		1		18		Historical Observations		1986		3	?	28		24.285	141.481			1986	1986	1	1976	1976	1
211060	Etna	13815	Confirmed Eruption	SE Crater and SE flank (2750-2420 m)	1			1985		12		19		Historical Observations		1985		12		31		37.748	14.999			1985	1985	1	1976	1976	1
311240	Cleveland	19809	Uncertain Eruption		1			1985		12		10										52.825	-169.944			1985		0	1976	1976	1
255060	Kavachi	15171	Confirmed Eruption		1			1985		12		9		Historical Observations		1986		2		28	3	-8.991	157.979			1985	1986	2	1976	1976	1
284096	Nishinoshima	18364	Uncertain Eruption		0			1985		12		2				1985		12		2		27.247	140.874			1985	1985	1	1976	1976	1
344120	Concepcion	11070	Confirmed Eruption		1			1985		12		2	1	Historical Observations		1986		4	?	20		11.538	-85.622			1985	1986	2	1976	1976	1
355020	Guallatiri	11822	Uncertain Eruption					1985		12		1										-18.42	-69.092			1985		0	1976	1976	1
252120	Ulawun	15058	Confirmed Eruption		3			1985		11		17		Historical Observations		1985		11		22		-5.05	151.33			1985	1985	1	1976	1976	1
343100	San Miguel	10863	Confirmed Eruption		1			1985		11		16	15	Historical Observations		1986		2	>	16	15	13.434	-88.269			1985	1986	2	1976	1976	1
241100	Ruapehu	14653	Confirmed Eruption		1			1985		11		15		Historical Observations		1985		11		15		-39.28	175.57			1985	1985	1	1976	1976	1
263090	Tangkuban Parahu	15684	Uncertain Eruption	Kawah Baru	1			1985		11		15				1985		11		15		-6.77	107.6			1985	1985	1	1976	1976	1
272020	Kanlaon	16737	Confirmed Eruption		1			1985		10		5		Historical Observations		1985		12		7		10.412	123.132			1985	1985	1	1976	1976	1
282030	Suwanosejima	16939	Confirmed Eruption	O-take	2			1985		9		16	15	Historical Observations		1987		6		16	15	29.638	129.714			1985	1987	3	1976	1976	1
345020	Rincon de la Vieja	11101	Confirmed Eruption		1			1985		9		16	15	Historical Observations		1986		4		16	15	10.83	-85.324			1985	1986	2	1976	1976	1
351020	Ruiz, Nevado del	11290	Confirmed Eruption	Arenas Crater	3			1985		9		11		Historical Observations		1991		7		13		4.892	-75.324			1985	1991	7	1975	1975	1
344020	San Cristobal	10884	Uncertain Eruption					1985		9		2										12.702	-87.004			1985		0	1975	1975	1
284142	Supply Reef	18476	Uncertain Eruption	25 km? NW of Supply Reef	0			1985		9		2										20.13	145.1			1985		0	1975	1975	1
263340	Raung	16147	Confirmed Eruption		2			1985		8		23		Historical Observations		1986		2		28		-8.119	114.056			1985	1986	2	1975	1975	1
300260	Klyuchevskoy	19466	Confirmed Eruption	Summit and NW flank (3100 m)	3	?		1985		8		16		Historical Observations		1986		1		21		56.056	160.642			1985	1986	2	1975	1975	1
264050	Sangeang Api	16251	Confirmed Eruption	Doro Api	3			1985		7		30		Historical Observations		1988		2		16	15	-8.2	119.07			1985	1988	4	1975	1975	1
341040	Colima	10470	Confirmed Eruption		1			1985		7		2	182	Historical Observations		1986		1		5	4	19.514	-103.62			1985	1986	2	1975	1975	1
354010	Misti, El	11774	Confirmed Eruption		1	?		1985		7		2	182	Historical Observations								-16.294	-71.409			1985		0	1975	1975	1
390028	Hudson Mountains	19976	Uncertain Eruption	Webber Nunatak				1985		7		2	182									-74.33	-99.42			1985		0	1975	1975	1
285050	Tokachidake	18659	Confirmed Eruption	East wall of 1962 crater	1			1985		6		19		Historical Observations		1985		6		22		43.418	142.686			1985	1985	1	1975	1975	1
233020	Fournaise, Piton de la	14372	Confirmed Eruption	Dolomieu and flanks, SE rift zone	1			1985		6		14		Historical Observations		1988		12		29		-21.244	55.708			1985	1988	4	1975	1975	1
300250	Bezymianny	19362	Confirmed Eruption		3			1985		6		12		Historical Observations		1985		12		14		55.972	160.595			1985	1985	1	1975	1975	1
300270	Sheveluch	19582	Confirmed Eruption		2			1985		5		26		Historical Observations		1985		10		25		56.653	161.36			1985	1985	1	1975	1975	1
241100	Ruapehu	14652	Confirmed Eruption		1			1985		5	<	21		Historical Observations		1985		6	?	9		-39.28	175.57			1985	1985	1	1975	1975	1
266030	Soputan	16430	Confirmed Eruption		2			1985		5		19		Historical Observations		1985		5		20		1.112	124.737			1985	1985	1	1975	1975	1
352020	Guagua Pichincha	11492	Confirmed Eruption	1981 crater	1			1985		5		16	15	Historical Observations		1985		6		16	15	-0.171	-78.598			1985	1985	1	1974	1974	1
300130	Karymsky	19185	Discredited Eruption					1985		5	?	3										54.049	159.443			1985		0	1974	1974	1
243110	Niuafo'ou	14798	Confirmed Eruption	NE part of caldera lake (Vai Lahi)	0			1985		3		21		Historical Observations		1985		3		22		-15.6	-175.63			1985	1985	1	1974	1974	1
272020	Kanlaon	16736	Confirmed Eruption		1			1985		3		13		Historical Observations		1985		3		14		10.412	123.132			1985	1985	1	1974	1974	1
211060	Etna	13814	Confirmed Eruption	SE Crater, south flank (2620-2480 m)	1			1985		3		8		Historical Observations		1985		7		13		37.748	14.999			1985	1985	1	1974	1974	1
264150	Paluweh	16272	Confirmed Eruption	Rokatenda (west side of lava dome)	1			1985		2		3		Historical Observations		1985		2		3		-8.32	121.708			1985	1985	1	1974	1974	1
234010	Heard	14405	Confirmed Eruption	Mawson Peak	2	?		1985		1		14		Historical Observations		1987		1	?	16	15	-53.106	73.513			1985	1987	3	1974	1974	1
333010	Teahitia	10302	Confirmed Eruption		0			1985		1		10		Hydrophonic		1985		1		25		-17.564	-148.821			1985	1985	1	1974	1974	1
376010	Jan Mayen	12972	Confirmed Eruption	Beerenberg (NE flank, 0-200 m)	0			1985		1		6		Historical Observations		1985		1		9		71.082	-8.155			1985	1985	1	1974	1974	1
252120	Ulawun	15057	Confirmed Eruption		1			1984		12		30		Historical Observations		1985		1		27		-5.05	151.33			1984	1985	2	1974	1974	1
284100	Kaitoku Seamount	18375	Uncertain Eruption		0			1984		12		23				1984		12		23		26.127	141.102			1984	1984	1	1974	1974	1
351020	Ruiz, Nevado del	11289	Confirmed Eruption	Arenas Crater	1			1984		12		22		Historical Observations		1985		3	?	19		4.892	-75.324			1984	1985	2	1974	1974	1
344120	Concepcion	11069	Confirmed Eruption		2			1984		12		16	15	Historical Observations		1985		1		2		11.538	-85.622			1984	1985	2	1974	1974	1
355100	Lascar	11863	Confirmed Eruption	Western crater of east summit cone	0			1984		12		16	15	Historical Observations		1985		7		16	15	-23.37	-67.73			1984	1985	2	1974	1974	1
312070	Veniaminof	20168	Confirmed Eruption	Western intracaldera cone	2			1984		11		29		Historical Observations		1984		12	?	6		56.17	-159.38			1984	1984	1	1974	1974	1
261140	Marapi	15474	Confirmed Eruption	Kepundan Tuo, Kepundan B	1			1984		11		15		Historical Observations		1984		11		15		-0.38	100.474			1984	1984	1	1974	1974	1
332000	Loihi	20730	Uncertain Eruption		0			1984		11		11				1985		1		21		18.92	-155.27			1984	1985	2	1974	1974	1
241100	Ruapehu	14651	Confirmed Eruption		1			1984		10	?	25		Historical Observations		1984		12		16	15	-39.28	175.57			1984	1984	1	1974	1974	1
282030	Suwanosejima	16938	Confirmed Eruption	O-take	2			1984		10		16	15	Historical Observations		1984		10		16	15	29.638	129.714			1984	1984	1	1974	1974	1
273030	Mayon	16806	Confirmed Eruption		3			1984		9		9		Historical Observations		1984		10		6		13.257	123.685			1984	1984	1	1974	1974	1
373080	Krafla	12953	Confirmed Eruption	Leirhnjúkur to 8.5 km north	0			1984		9		4		Historical Observations		1984		9		18		65.715	-16.728			1984	1984	1	1974	1974	1
252120	Ulawun	15056	Confirmed Eruption		1			1984		8		23		Historical Observations		1984		9		11		-5.05	151.33			1984	1984	1	1974	1974	1
373010	Grimsvotn	12839	Uncertain Eruption		0			1984		8	<	20										64.416	-17.316			1984		0	1974	1974	1
357120	Villarrica	12169	Confirmed Eruption		2			1984		8		11		Historical Observations		1985		11		18		-39.42	-71.93			1984	1985	2	1974	1974	1
300070	Gorely	19025	Confirmed Eruption		2			1984		8		4		Historical Observations		1986		9	?	21		52.559	158.03			1984	1986	3	1974	1974	1
211060	Etna	13813	Confirmed Eruption	NE Crater	3			1984		7		20		Historical Observations		1986		9		24		37.748	14.999			1984	1986	3	1974	1974	1
311240	Cleveland	19808	Confirmed Eruption		1			1984		7		12		Historical Observations		1984		7		12		52.825	-169.944			1984	1984	1	1974	1974	1
257040	Ambrym	15285	Confirmed Eruption		2			1984		7		2	182	Historical Observations		1986		3	>	8		-16.25	168.12			1984	1986	3	1974	1974	1
266100	Lokon-Empung	16456	Uncertain Eruption	Tompaluan	1			1984		6		5	4			1984		11		16	15	1.358	124.792			1984	1984	1	1974	1974	1
256010	Tinakula	15202	Confirmed Eruption	Upper NW flank	2			1984		6	<	3		Historical Observations		1985		6	>	13		-10.386	165.804			1984	1985	2	1973	1973	1
266030	Soputan	16429	Confirmed Eruption		3			1984		5		24		Historical Observations		1984		8		31		1.112	124.737			1984	1984	1	1973	1973	1
263310	Tengger Caldera	16059	Confirmed Eruption	Bromo	1			1984		5		12		Historical Observations		1984		5		31		-7.942	112.95			1984	1984	1	1973	1973	1
264150	Paluweh	16271	Confirmed Eruption	Rokatenda (west side of lava dome)	2			1984		5		9		Historical Observations		1984		5		21		-8.32	121.708			1984	1984	1	1973	1973	1
285070	Akan	18700	Confirmed Eruption	Me-Akan (Ponmachineshiri)	1			1984		5		1		Historical Observations		1984		5		1		43.384	144.013			1984	1984	1	1973	1973	1
211060	Etna	13812	Confirmed Eruption	SE Crater	1			1984		4		28		Historical Observations		1984		10		18		37.748	14.999			1984	1984	1	1973	1973	1
357110	Llaima	12066	Confirmed Eruption		2			1984		4		20		Historical Observations		1984		11		26		-38.692	-71.729			1984	1984	1	1973	1973	1
282110	Asosan	17343	Confirmed Eruption	Naka-dake	1			1984		4		13	3	Historical Observations		1985		6		24		32.884	131.104			1984	1985	2	1973	1973	1
241100	Ruapehu	14650	Confirmed Eruption		1			1984		4		2		Historical Observations								-39.28	175.57			1984		0	1973	1973	1
345020	Rincon de la Vieja	11100	Confirmed Eruption		2			1984		3		31		Historical Observations		1984		4		16	15	10.83	-85.324			1984	1984	1	1973	1973	1
353010	Fernandina	11672	Confirmed Eruption	NW corner of caldera	1			1984		3		30		Historical Observations								-0.37	-91.55			1984		0	1973	1973	1
332020	Mauna Loa	10226	Confirmed Eruption	Mokuaweoweo, SW and NE rift zones	0			1984		3		25		Historical Observations		1984		4		15		19.475	-155.608			1984	1984	1	1973	1973	1
300270	Sheveluch	19581	Confirmed Eruption		2	?		1984		3		17		Historical Observations		1984		9		6		56.653	161.36			1984	1984	1	1973	1973	1
300260	Klyuchevskoy	19465	Confirmed Eruption		3			1984		3		10		Historical Observations		1985		1		28		56.056	160.642			1984	1985	2	1973	1973	1
284100	Kaitoku Seamount	18374	Confirmed Eruption	Higashi-Kaitokuba	0			1984		3		8		Historical Observations		1984		3	?	26		26.127	141.102			1984	1984	1	1973	1973	1
243080	Home Reef	14770	Confirmed Eruption		3	?		1984		3		1		Historical Observations		1984		3		5		-18.992	-174.775			1984	1984	1	1973	1973	1
223020	Nyamulagira	14071	Confirmed Eruption	NW flank (Kivandimwe)	2			1984		2		23		Historical Observations		1984		3		14		-1.408	29.2			1984	1984	1	1973	1973	1
300250	Bezymianny	19361	Confirmed Eruption		3			1984		2		5		Historical Observations		1984		12		16	15	55.972	160.595			1984	1984	1	1973	1973	1
263140	Galunggung	15722	Confirmed Eruption		1			1984		1		9		Historical Observations		1984		1	?	31		-7.25	108.058			1984	1984	1	1973	1973	1
241040	Whakaari/White Island	14489	Confirmed Eruption	North margin of 1978 crater complex	2			1983		12		26	5	Historical Observations		1984		2		12	5	-37.52	177.18			1983	1984	2	1973	1973	1
263310	Tengger Caldera	16058	Confirmed Eruption	Bromo	1			1983		12		21		Historical Observations		1983		12		21		-7.942	112.95			1983	1983	1	1973	1973	1
333010	Teahitia	10301	Confirmed Eruption		0			1983		12		18		Hydrophonic		1984		7		14		-17.564	-148.821			1983	1984	2	1973	1973	1
233020	Fournaise, Piton de la	14371	Confirmed Eruption	SSW flank of Dolomieu (2110-2300 m)	2			1983		12		4		Historical Observations		1984		2		18		-21.244	55.708			1983	1984	2	1973	1973	1
312030	Pavlof	20148	Confirmed Eruption	Upper NNE flank	3			1983		11		11		Historical Observations		1983		12		18		55.417	-161.894			1983	1983	1	1973	1973	1
252120	Ulawun	15055	Confirmed Eruption		1			1983		11		6		Historical Observations		1984		3		13		-5.05	151.33			1983	1984	2	1973	1973	1
333060	Macdonald	10321	Confirmed Eruption		0			1983		10		27		Hydrophonic		1984		1		3		-28.98	-140.25			1983	1984	2	1973	1973	1
357120	Villarrica	12168	Confirmed Eruption		1			1983		10		14		Historical Observations		1983		10		16		-39.42	-71.93			1983	1983	1	1973	1973	1
284040	Miyakejima	18272	Confirmed Eruption	SW flank (4.5 km long NE-SW fissure)	3			1983		10		3		Historical Observations		1983		10		4		34.094	139.526			1983	1983	1	1973	1973	1
263090	Tangkuban Parahu	15683	Confirmed Eruption	Kawah Ratu	1			1983		9		14		Historical Observations								-6.77	107.6			1983		0	1972	1972	1
264250	Iliwerung	16348	Confirmed Eruption	Hobal (submarine vent on SE flank)	1			1983		8		17		Historical Observations		1983		8		18		-8.53	123.57			1983	1983	1	1972	1972	1
268060	Gamalama	16668	Confirmed Eruption		3			1983		8		9		Historical Observations		1983		8		12		0.8	127.33			1983	1983	1	1972	1972	1
283120	Kusatsu-Shiranesan	17844	Confirmed Eruption	Yu-gama, Kara-gama	1			1983		7		26		Historical Observations		1983		12		21		36.618	138.528			1983	1983	1	1972	1972	1
266010	Colo	16423	Confirmed Eruption	Gunung Colo	4			1983		7		18		Historical Observations		1983		12		16	15	-0.162	121.601			1983	1983	1	1972	1972	1
282110	Asosan	17342	Confirmed Eruption	Naka-dake	1			1983		7		16	15	Historical Observations		1983		10		16	15	32.884	131.104			1983	1983	1	1972	1972	1
284110	Kita-Ioto	18383	Uncertain Eruption	Funka-Asane	0			1983		7		16	15			1983		7		16	15	25.424	141.284			1983	1983	1	1972	1972	1
333010	Teahitia	10300	Confirmed Eruption		0			1983		7		12		Hydrophonic		1983		7		26		-17.564	-148.821			1983	1983	1	1972	1972	1
312030	Pavlof	20147	Confirmed Eruption		2	?		1983		7		11		Historical Observations		1983		7		18		55.417	-161.894			1983	1983	1	1972	1972	1
311290	Okmok	19849	Confirmed Eruption	SW part of caldera (Cone A)	2			1983		7		8		Historical Observations		1983		7		8		53.43	-168.13			1983	1983	1	1972	1972	1
284096	Nishinoshima	18363	Uncertain Eruption		0			1983		7		2	182			1984		7		2	182	27.247	140.874			1983	1984	2	1972	1972	1
261140	Marapi	15472	Confirmed Eruption	Kepundan Tuo and Kepundan Verbeek	1			1983		7		2	182	Historical Observations								-0.38	100.474			1983		0	1972	1972	1
257040	Ambrym	15284	Confirmed Eruption	Marum	2			1983		7		2	182	Historical Observations								-16.25	168.12			1983		0	1972	1972	1
273010	Bulusan	16767	Confirmed Eruption		2			1983		6		25		Historical Observations		1983		6		29		12.769	124.056			1983	1983	1	1972	1972	1
312070	Veniaminof	20167	Confirmed Eruption	Western intracaldera cone	3			1983		6		2		Historical Observations		1984		4		17		56.17	-159.38			1983	1984	2	1972	1972	1
373010	Grimsvotn	12838	Confirmed Eruption	Near south caldera wall	2			1983		5		28		Historical Observations		1983		6		2		64.416	-17.316			1983	1983	1	1972	1972	1
267020	Karangetang	16533	Confirmed Eruption	Summit and SW flank (1443 m)	3			1983		5		16	15	Historical Observations		1988		12	>	31		2.781	125.407			1983	1988	6	1972	1972	1
284070	Myojinsho	18328	Uncertain Eruption	Myojinsho	0			1983		5		12										31.888	139.918			1983		0	1972	1972	1
264220	Iliboleng	16323	Confirmed Eruption		2			1983		5		11		Historical Observations		1984		4		13		-8.342	123.258			1983	1984	2	1972	1972	1
263310	Tengger Caldera	16057	Uncertain Eruption	Bromo	1			1983		4		15	5			1983		6		28	1	-7.942	112.95			1983	1983	1	1972	1972	1
283090	Niigata-Yakeyama	17547	Confirmed Eruption		1			1983		4	?	14		Historical Observations		1983		4	?	15		36.921	138.036			1983	1983	1	1971	1971	1
283110	Asamayama	17807	Confirmed Eruption		2			1983		4		8		Historical Observations		1983		4		8		36.406	138.523			1983	1983	1	1971	1971	1
211060	Etna	13811	Confirmed Eruption	South flank (2680-2250 m)	1			1983		3		28		Historical Observations		1983		8		6		37.748	14.999			1983	1983	1	1971	1971	1
344120	Concepcion	11068	Confirmed Eruption		2			1983		3		16		Historical Observations		1983		3		25		11.538	-85.622			1983	1983	1	1971	1971	1
333060	Macdonald	10320	Confirmed Eruption		0			1983		3		14		Hydrophonic		1983		5		21		-28.98	-140.25			1983	1983	1	1971	1971	1
258020	Hunter Island	15368	Discredited Eruption					1983		3	<	9										-22.4	172.05			1983		0	1971	1971	1
341040	Colima	10461	Uncertain Eruption		1	?		1983		2		11				1983		2		15		19.514	-103.62			1983	1983	1	1971	1971	1
345020	Rincon de la Vieja	11099	Confirmed Eruption		1			1983		2		6		Historical Observations		1983		2		21		10.83	-85.324			1983	1983	1	1971	1971	1
332010	Kilauea	10119	Confirmed Eruption	East rift zone (Puu O'o), Halemaumau	3			1983		1		3		Historical Observations		2018		9		5		19.421	-155.287			1983	2018	36	1971	1971	1
222120	Lengai, Ol Doinyo	14023	Confirmed Eruption	North Crater	2			1983		1		1		Historical Observations		1993		9		24		-2.764	35.914			1983	1993	11	1971	1971	1
261140	Marapi	15471	Confirmed Eruption		1			1982		12		16	15	Historical Observations		1982		12		16	15	-0.38	100.474			1982	1982	1	1971	1971	1
284133	Fukujin	18441	Uncertain Eruption		0			1982		12		15										21.93	143.47			1982		0	1971	1971	1
284120	Ioto	18417	Confirmed Eruption	West side (Asodai)	1			1982		11		28		Historical Observations		1982		12	?	16	15	24.751	141.289			1982	1982	1	1971	1971	1
290150	Chirpoi	18785	Confirmed Eruption	Snow	2			1982		11		22		Historical Observations								46.532	150.871			1982		0	1971	1971	1
264220	Iliboleng	16322	Confirmed Eruption		2			1982		11		17		Historical Observations		1982		11		17		-8.342	123.258			1982	1982	1	1971	1971	1
283120	Kusatsu-Shiranesan	17843	Confirmed Eruption	Kara-gama, Yu-gama	1			1982		10		26		Historical Observations		1982		12		29		36.618	138.528			1982	1982	1	1971	1971	1
257050	Lopevi	15315	Confirmed Eruption		2			1982		10		24		Historical Observations		1982		10		25		-16.507	168.346			1982	1982	1	1971	1971	1
224010	Cameroon	14132	Confirmed Eruption	SW flank (2500 m)	2			1982		10		16		Historical Observations		1982		11		12		4.203	9.17			1982	1982	1	1971	1971	1
300260	Klyuchevskoy	19464	Confirmed Eruption	Summit and east flank (2875 m)	2			1982		10		7		Historical Observations		1983		6		27		56.056	160.642			1982	1983	2	1971	1971	1
311320	Akutan	20029	Confirmed Eruption		2			1982		10		5	4	Historical Observations		1983		5		16	15	54.134	-165.986			1982	1983	2	1971	1971	1
283110	Asamayama	17806	Confirmed Eruption		1			1982		10		2		Historical Observations		1982		10		2		36.406	138.523			1982	1982	1	1971	1971	1
332010	Kilauea	10118	Confirmed Eruption	Kilauea Caldera (SSE of Halemaumau)	0			1982		9		25		Historical Observations		1982		9		26		19.421	-155.287			1982	1982	1	1971	1971	1
353020	Wolf	11690	Confirmed Eruption	Caldera and SE flank (875 m)	1			1982		8		28		Historical Observations		1982		9	?	6		0.02	-91.35			1982	1982	1	1971	1971	1
266030	Soputan	16428	Confirmed Eruption		3			1982		8		26		Historical Observations		1982		11		10		1.112	124.737			1982	1982	1	1971	1971	1
284070	Myojinsho	18327	Uncertain Eruption	Myojinsho	0			1982		8		10										31.888	139.918			1982		0	1971	1971	1
263340	Raung	16146	Confirmed Eruption		3			1982		7		18		Historical Observations		1982		7		20		-8.119	114.056			1982	1982	1	1971	1971	1
312030	Pavlof	20146	Uncertain Eruption		1	?		1982		7		15	45									55.417	-161.894			1982		0	1971	1971	1
331030	Cleft Segment	20718	Confirmed Eruption	N Cleft Segment, S Juan de Fuca Ridge	0		<	1982		7		2	182	Historical Observations								44.83	-130.3			1982		0	1971	1971	1
267020	Karangetang	16532	Confirmed Eruption		1			1982		7		2	182	Historical Observations								2.781	125.407			1982		0	1971	1971	1
241040	Whakaari/White Island	14488	Discredited Eruption					1982		7		1										-37.52	177.18			1982		0	1970	1970	1
223030	Nyiragongo	14104	Confirmed Eruption		1			1982		6		21		Historical Observations		1982		10		17	15	-1.52	29.25			1982	1982	1	1970	1970	1
284110	Kita-Ioto	18382	Uncertain Eruption	Funka-Asane	0			1982		6		16	15			1982		6		16	15	25.424	141.284			1982	1982	1	1970	1970	1
242050	Monowai	14709	Confirmed Eruption		0			1982		5		16	15	Hydrophonic		1982		5		16	15	-25.887	-177.188			1982	1982	1	1970	1970	1
332010	Kilauea	10117	Confirmed Eruption	Kilauea Caldera (NE of Halemaumau)	0			1982		4		30		Historical Observations		1982		5		1		19.421	-155.287			1982	1982	1	1970	1970	1
283110	Asamayama	17805	Confirmed Eruption		2			1982		4		26		Historical Observations		1982		4		26		36.406	138.523			1982	1982	1	1970	1970	1
257020	Gaua	15230	Confirmed Eruption	Mt. Garat	2			1982		4		18		Historical Observations		1982		4		18		-14.27	167.5			1982	1982	1	1970	1970	1
284096	Nishinoshima	18362	Uncertain Eruption		0			1982		4		16	15			1982		4		16	15	27.247	140.874			1982	1982	1	1970	1970	1
255060	Kavachi	15170	Confirmed Eruption		2			1982		4		7		Historical Observations		1982		6		2	1	-8.991	157.979			1982	1982	1	1970	1970	1
284210	Esmeralda Bank	18544	Uncertain Eruption		0			1982		4		6										15	145.25			1982		0	1970	1970	1
263140	Galunggung	15721	Confirmed Eruption	New crater at Gunung Jadi location	4			1982		4		5		Historical Observations		1983		1		8		-7.25	108.058			1982	1983	2	1970	1970	1
290390	Alaid	18889	Confirmed Eruption		2			1982		3		29		Historical Observations		1982		3		29		50.861	155.565			1982	1982	1	1970	1970	1
341120	Chichon, El	10610	Confirmed Eruption		5			1982		3		28		Historical Observations		1982		9		11		17.36	-93.228			1982	1982	1	1970	1970	1
300260	Klyuchevskoy	19463	Confirmed Eruption		1			1982		3		24		Historical Observations		1982		5		2		56.056	160.642			1982	1982	1	1970	1970	1
333010	Teahitia	10299	Confirmed Eruption		0			1982		3		16		Hydrophonic		1982		5		19		-17.564	-148.821			1982	1982	1	1970	1970	1
261140	Marapi	15470	Confirmed Eruption		1			1982		3	<	10		Historical Observations		1982		5		16	15	-0.38	100.474			1982	1982	1	1970	1970	1
284120	Ioto	18416	Confirmed Eruption	NW side (Idogahama beach)	1			1982		3		9		Historical Observations		1982		3		10		24.751	141.289			1982	1982	1	1970	1970	1
333060	Macdonald	10319	Confirmed Eruption		0			1982		3		1		Hydrophonic		1982		6		6		-28.98	-140.25			1982	1982	1	1970	1970	1
290030	Chachadake [Tiatia]	18744	Uncertain Eruption		1			1982		2		10				1982		2		14		44.353	146.252			1982	1982	1	1970	1970	1
311070	Gareloi	19686	Confirmed Eruption		3			1982		1		15		Historical Observations		1982		1		15		51.79	-178.794			1982	1982	1	1970	1970	1
344120	Concepcion	11067	Confirmed Eruption		2			1982		1		15	5	Historical Observations		1982		2		14	5	11.538	-85.622			1982	1982	1	1969	1969	1
284133	Fukujin	18440	Uncertain Eruption		0			1982		1		12				1982		3		16		21.93	143.47			1982	1982	1	1969	1969	1
223020	Nyamulagira	14070	Confirmed Eruption	SE flank (Rugarambiro)	3			1981		12		25		Historical Observations		1982		1		14		-1.408	29.2			1981	1982	2	1969	1969	1
300260	Klyuchevskoy	19462	Uncertain Eruption					1981		12		21										56.056	160.642			1981		0	1969	1969	1
211060	Etna	13810	Confirmed Eruption	NE Crater	2			1981		11		26		Historical Observations		1981		11		26		37.748	14.999			1981	1981	1	1969	1969	1
290390	Alaid	18888	Confirmed Eruption		2			1981		11		25		Historical Observations								50.861	155.565			1981		0	1969	1969	1
344040	Telica	10931	Confirmed Eruption		2			1981		11		25	5	Historical Observations		1982		3		2		12.606	-86.84			1981	1982	2	1969	1969	1
373080	Krafla	12952	Confirmed Eruption	Leirhnjúkur to 9 km north	0			1981		11		18		Historical Observations		1981		11		23		65.715	-16.728			1981	1981	1	1969	1969	1
241100	Ruapehu	14649	Confirmed Eruption		1			1981		10	?	25		Historical Observations		1982		4		12	3	-39.28	175.57			1981	1982	2	1969	1969	1
312030	Pavlof	20145	Confirmed Eruption	Upper NNE flank (100 m below summit)	3			1981		9		25		Historical Observations		1981		9		27		55.417	-161.894			1981	1981	1	1969	1969	1
311360	Shishaldin	20089	Uncertain Eruption					1981		9		25										54.756	-163.97			1981		0	1969	1969	1
255060	Kavachi	15169	Uncertain Eruption		0			1981		9		15	5									-8.991	157.979			1981		0	1969	1969	1
352020	Guagua Pichincha	11491	Confirmed Eruption	NE side of 1660 lava dome	1			1981		8		31	5	Historical Observations		1982		11	?	16	15	-0.171	-78.598			1981	1982	2	1969	1969	1
353010	Fernandina	11671	Confirmed Eruption	South caldera rim	0			1981		8		1	270	Historical Observations								-0.37	-91.55			1981		0	1969	1969	1
257020	Gaua	15229	Confirmed Eruption	Mt. Garat	1	?		1981		7		9		Historical Observations		1981		7		9		-14.27	167.5			1981	1981	1	1969	1969	1
263200	Dieng Volcanic Complex	15787	Confirmed Eruption	Sikidang	1	?		1981		7		2	182	Historical Observations								-7.2	109.879			1981		0	1969	1969	1
282110	Asosan	17341	Confirmed Eruption	Naka-dake	1			1981		6		15		Historical Observations		1981		6		15		32.884	131.104			1981	1981	1	1969	1969	1
300250	Bezymianny	19360	Confirmed Eruption		3			1981		6		12		Historical Observations		1983		5		22		55.972	160.595			1981	1983	3	1969	1969	1
290030	Chachadake [Tiatia]	18743	Confirmed Eruption		2	?		1981		6		10		Historical Observations		1981		6		25		44.353	146.252			1981	1981	1	1969	1969	1
241050	Okataina	14526	Confirmed Eruption	Waimangu (Raupo Pond crater)	1			1981		5		16	15	Historical Observations		1981		5		16	15	-38.12	176.5			1981	1981	1	1969	1969	1
284170	Pagan	18515	Confirmed Eruption	North Pagan (summit and north flank)	4			1981		5		15		Historical Observations		1985		5	>	1		18.13	145.8			1981	1985	5	1969	1969	1
290390	Alaid	18887	Confirmed Eruption		4			1981		4		27		Historical Observations		1981		6		5		50.861	155.565			1981	1981	1	1969	1969	1
262000	Krakatau	15615	Confirmed Eruption	Anak Krakatau	1			1981		4		24		Historical Observations		1981		10		20		-6.102	105.423			1981	1981	1	1969	1969	1
273010	Bulusan	16766	Confirmed Eruption		3			1981		4		9		Historical Observations		1981		4		27		12.769	124.056			1981	1981	1	1968	1968	1
372070	Hekla	12752	Confirmed Eruption	Summit and north flank (900 and 740 m)	2			1981		4		9		Historical Observations		1981		4		16		63.983	-19.666			1981	1981	1	1968	1968	1
312030	Pavlof	20144	Confirmed Eruption		1			1981		3	<	30		Historical Observations		1981		5		28		55.417	-161.894			1981	1981	1	1968	1968	1
311290	Okmok	19848	Confirmed Eruption	SW part of caldera (Cone A)	3	?		1981		3		24		Historical Observations		1981		3		24		53.43	-168.13			1981	1981	1	1968	1968	1
211060	Etna	13809	Confirmed Eruption	NNW flank (2550-1140 m)	2			1981		3		17		Historical Observations		1981		3		23		37.748	14.999			1981	1981	1	1968	1968	1
345040	Poas	11182	Confirmed Eruption		1			1981		3		16	15	Historical Observations		1981		5		16	15	10.2	-84.233			1981	1981	1	1968	1968	1
333040	Mehetia	10307	Uncertain Eruption	SE of Mehetia (-1700 m?)	0			1981		3		5				1981		12		16	15	-17.874	-148.068			1981	1981	1	1968	1968	1
268040	Gamkonora	16593	Confirmed Eruption		1			1981		3		4		Historical Observations		1981		7		25		1.38	127.53			1981	1981	1	1968	1968	1
285040	Shikotsu	18633	Confirmed Eruption	Tarumai	1			1981		2		27		Historical Observations		1981		2		27		42.688	141.38			1981	1981	1	1968	1968	1
257040	Ambrym	15283	Confirmed Eruption	Benbow, Marum	2			1981		2		20		Historical Observations		1981		9		30		-16.25	168.12			1981	1981	1	1968	1968	1
344040	Telica	10930	Confirmed Eruption		1			1981		2	?	16	15	Historical Observations								12.606	-86.84			1981		0	1968	1968	1
233020	Fournaise, Piton de la	14370	Confirmed Eruption	Bory, SW, N & NE of Dolomieu	2			1981		2		3		Historical Observations		1981		5		5		-21.244	55.708			1981	1981	1	1968	1968	1
373080	Krafla	12951	Confirmed Eruption	6-8 km N of Leirhnjúkur	0			1981		1		30		Historical Observations		1981		2		4		65.715	-16.728			1981	1981	1	1968	1968	1
211060	Etna	13808	Confirmed Eruption	NE Crater	2			1981		1		26	5	Historical Observations		1981		3		5	4	37.748	14.999			1981	1981	1	1968	1968	1
300260	Klyuchevskoy	19461	Confirmed Eruption		1			1981		1		25		Historical Observations		1981		8	?	4		56.056	160.642			1981	1981	1	1968	1968	1
284133	Fukujin	18439	Uncertain Eruption		0			1981		1		7				1981		1		8		21.93	143.47			1981	1981	1	1968	1968	1
345040	Poas	11181	Confirmed Eruption		1			1980		12		26		Historical Observations		1980		12		26		10.2	-84.233			1980	1980	1	1968	1968	1
284070	Myojinsho	18326	Uncertain Eruption	Myojinsho	0			1980		11		15				1980		12		23		31.888	139.918			1980	1980	1	1968	1968	1
333060	Macdonald	10318	Confirmed Eruption		0			1980		11		10		Hydrophonic		1981		2		15		-28.98	-140.25			1980	1981	2	1968	1968	1
312030	Pavlof	20143	Confirmed Eruption	Upper NNE flank	3			1980		11		8		Historical Observations		1980		11		13		55.417	-161.894			1980	1980	1	1968	1968	1
264150	Paluweh	16270	Confirmed Eruption	Rokatenda	2			1980		11		5		Historical Observations		1981		9		16	15	-8.32	121.708			1980	1981	2	1968	1968	1
241100	Ruapehu	14648	Confirmed Eruption		1			1980		10		18		Historical Observations		1980		11		3		-39.28	175.57			1980	1980	1	1968	1968	1
357091	Callaqui	11997	Confirmed Eruption		1			1980		10		16	15	Historical Observations		1980		10		16	15	-37.92	-71.45			1980	1980	1	1968	1968	1
255060	Kavachi	15168	Confirmed Eruption		1			1980		10		7		Historical Observations		1981		2		25		-8.991	157.979			1980	1981	2	1968	1968	1
252120	Ulawun	15054	Confirmed Eruption		3			1980		10		6		Historical Observations		1980		10		7		-5.05	151.33			1980	1980	1	1968	1968	1
282050	Kuchinoerabujima	16979	Confirmed Eruption	NNE-SSW fissure on E side of Shindake	2			1980		9		28		Historical Observations		1980		9		28		30.443	130.217			1980	1980	1	1968	1968	1
282110	Asosan	17340	Confirmed Eruption	Naka-dake	1			1980		9		24		Historical Observations		1980		9		24		32.884	131.104			1980	1980	1	1968	1968	1
234070	Marion Island	14413	Confirmed Eruption	E-W fissure from summit to W coast	1			1980		9	?	16	15	Historical Observations								-46.9	37.75			1980		0	1968	1968	1
345040	Poas	11180	Confirmed Eruption		1			1980		9		12		Historical Observations		1980		9		12		10.2	-84.233			1980	1980	1	1968	1968	1
268060	Gamalama	16667	Confirmed Eruption		2			1980		9		4		Historical Observations		1980		9		23		0.8	127.33			1980	1980	1	1968	1968	1
300270	Sheveluch	19580	Confirmed Eruption	Center of 1964 crater	1			1980		8		23		Historical Observations		1981		12		1	30	56.653	161.36			1980	1981	2	1968	1968	1
300250	Bezymianny	19356	Confirmed Eruption		2			1980		8		21		Historical Observations		1980		8		27	4	55.972	160.595			1980	1980	1	1968	1968	1
257070	Kuwae	15350	Uncertain Eruption	Karua	0			1980		8		20										-16.829	168.536			1980		0	1967	1967	1
372070	Hekla	12751	Confirmed Eruption	Summit, SW and NE flanks	3			1980		8		17		Historical Observations		1980		8		20		63.983	-19.666			1980	1980	1	1967	1967	1
272020	Kanlaon	16735	Confirmed Eruption		2			1980		8		8		Historical Observations								10.412	123.132			1980		0	1967	1967	1
311070	Gareloi	19685	Confirmed Eruption		3	?		1980		8		7		Historical Observations		1980		9		17		51.79	-178.794			1980	1980	1	1967	1967	1
211060	Etna	13807	Confirmed Eruption	NE Crater	3			1980		7		8		Historical Observations		1980		9		26		37.748	14.999			1980	1980	1	1967	1967	1
284096	Nishinoshima	18361	Uncertain Eruption	South, east, and west sides	0			1980		7		7			?	1981		7		2	182	27.247	140.874			1980	1981	2	1967	1967	1
312030	Pavlof	20142	Confirmed Eruption		1			1980		7		6	1	Historical Observations								55.417	-161.894			1980		0	1967	1967	1
311320	Akutan	20028	Confirmed Eruption		2			1980		7	<	3		Historical Observations		1980		7	?	8		54.134	-165.986			1980	1980	1	1967	1967	1		same year= 0	ex) 2020-2019=1
257020	Gaua	15228	Confirmed Eruption	Mt. Garat	1	?		1980		7		2	182	Historical Observations								-14.27	167.5			1980		0	1967	1967	1		sample mean	2.92085
357120	Villarrica	12167	Confirmed Eruption		2			1980		6		20		Historical Observations		1980		9		24		-39.42	-71.93			1980	1980	1	1967	1967	1		Significance level	0.05
390050	Seal Nunataks Group	13200	Uncertain Eruption	Dallman, Murdoch				1980		6		15	545									-65.03	-60.05			1980		0	1967	1967	1		Standard deviation of the population	5.32825
300070	Gorely	19024	Confirmed Eruption		3			1980		6		15	5	Historical Observations		1981		7		3		52.559	158.03			1980	1981	2	1967	1967	1		Sample size	518
263310	Tengger Caldera	16056	Confirmed Eruption	Bromo	2			1980		6		5	1	Historical Observations		1980		9		20		-7.942	112.95			1980	1980	1	1967	1967	1		confidence	0.458847
290270	Ekarma	18832	Confirmed Eruption		1			1980		5		24		Historical Observations								48.958	153.93			1980		0	1967	1967	1		confidence interval	2.462	3.3797
257040	Ambrym	15282	Confirmed Eruption	Marum	3			1980		5		16		Historical Observations		1980		8		18		-16.25	168.12			1980	1980	1	1967	1967	1		maximum	53
311310	Makushin	19988	Confirmed Eruption	SE side of summit	1			1980		5		1	75	Historical Observations								53.891	-166.923			1980		0	1967	1967	1		minimum	1
300250	Bezymianny	19355	Confirmed Eruption		3			1980		4		18		Historical Observations		1980		4		19		55.972	160.595			1980	1980	1	1967	1967	1
257050	Lopevi	15314	Confirmed Eruption	Summit, NW and SE flanks	3			1980		4		15		Historical Observations		1980		8		20		-16.507	168.346			1980	1980	1	1967	1967	1
261140	Marapi	15469	Confirmed Eruption		1			1980		3		29		Historical Observations								-0.38	100.474			1980		0	1967	1967	1
321050	St. Helens	20557	Confirmed Eruption	Summit and north flank	5			1980		3		27		Historical Observations		1986		10		28	3	46.2	-122.18			1980	1986	7	1967	1967	1
267020	Karangetang	16531	Confirmed Eruption		1			1980		3		24		Historical Observations		1980		9		13		2.781	125.407			1980	1980	1	1967	1967	1
373080	Krafla	12950	Confirmed Eruption	Leirhnjúkur to 11 km north	0			1980		3		16		Historical Observations		1980		10		23		65.715	-16.728			1980	1980	1	1967	1967	1
262000	Krakatau	15614	Confirmed Eruption	Anak Krakatau	2			1980		3		15	5	Historical Observations		1980		12		16	15	-6.102	105.423			1980	1980	1	1967	1967	1
284120	Ioto	18415	Confirmed Eruption	Kitanohara	1			1980		3		13		Historical Observations		1980		3		13		24.751	141.289			1980	1980	1	1967	1967	1
332010	Kilauea	10116	Confirmed Eruption	East rift zone (near Mauna Ulu)	0			1980		3		11		Historical Observations		1980		3		11		19.421	-155.287			1980	1980	1	2020	2021	2
333060	Macdonald	10317	Confirmed Eruption		0			1980		2		12		Hydrophonic		1980		2		13		-28.98	-140.25			1980	1980	1	2020	2021	2
223020	Nyamulagira	14069	Confirmed Eruption	North flank (Gasenyi)	3			1980		1		30		Historical Observations		1980		2		24		-1.408	29.2			1980	1980	1	2020	2021	2
242050	Monowai	14708	Confirmed Eruption		0			1980		1		16	15	Hydrophonic		1980		1		16	15	-25.887	-177.188			1980	1980	1	2020	2021	2
241100	Ruapehu	14647	Confirmed Eruption		1			1980		1	?	15		Historical Observations		1980		3	?	27		-39.28	175.57			1980	1980	1	2020	2021	2
357010	Tupungatito	20561	Confirmed Eruption	SW crater	2			1980		1		10		Historical Observations		1980		1		11		-33.425	-69.797			1980	1980	1	2020	2021	2
251030	Karkar	14949	Uncertain Eruption		1			1980		1		7				1980		1		17		-4.649	145.964			1980	1980	1	2020	2021	2
273010	Bulusan	16765	Confirmed Eruption		3			1979		12		27		Historical Observations		1980		9		28		12.769	124.056			1979	1980	2	2020	2021	2
332010	Kilauea	10115	Confirmed Eruption	East rift zone (Pauahi Crater)	0			1979		11		16		Historical Observations		1979		11		17		19.421	-155.287			1979	1979	1	2019	2020	2	1
284141	Ahyi	18470	Uncertain Eruption		0			1979		11		15										20.42	145.03			1979		0	2019	2020	2	1
353050	Negra, Sierra	11712	Confirmed Eruption	Upper NW and NE flanks (Volcán Chico)	3			1979		11		13		Historical Observations		1980		1	>	14		-0.83	-91.17			1979	1980	2	2019	2020	2	1
283040	Ontakesan	17457	Confirmed Eruption	200 m SW of Kengamine	2			1979		10		28		Historical Observations		1980		4		25		35.893	137.48			1979	1980	2	2019	2020	2	1
357110	Llaima	12065	Confirmed Eruption		2			1979		10		15		Historical Observations		1979		11		28		-38.692	-71.729			1979	1979	1	2018	2019	2	1
333060	Macdonald	10316	Confirmed Eruption		0			1979		9		30		Hydrophonic		1979		9		30		-28.98	-140.25			1979	1979	1	2018	2019	2	1
300250	Bezymianny	19354	Confirmed Eruption		2			1979		9		18		Historical Observations								55.972	160.595			1979		0	2018	2019	2	1
257070	Kuwae	15349	Uncertain Eruption	Karua	0			1979		9		16	15									-16.829	168.536			1979		0	2018	2019	2	1
345040	Poas	11179	Confirmed Eruption		1			1979		9		8		Historical Observations		1980		1		16	15	10.2	-84.233			1979	1980	2	2018	2019	2	1
211060	Etna	13806	Confirmed Eruption	SE Crater, SE, E and NE flanks	3	?		1979		7		16		Historical Observations		1980		9		1	5	37.748	14.999			1979	1980	2	2017	2018	2	1
262000	Krakatau	15613	Confirmed Eruption	Anak Krakatau	2			1979		7		15	5	Historical Observations		1979		11		16	15	-6.102	105.423			1979	1979	1	2017	2018	2	1
284070	Myojinsho	18325	Uncertain Eruption	Myojinsho	0			1979		7		13										31.888	139.918			1979		0	2017	2018	2	1
284132	Nikko	18430	Uncertain Eruption		0			1979		7		12										23.078	142.326			1979		0	2017	2018	2	1
211060	Etna	13805	Confirmed Eruption	Central Crater	2			1979		7		3		Historical Observations		1992		12		16	15	37.748	14.999			1979	1992	14	2016	2017	2	1
261030	Peuet Sague	15392	Confirmed Eruption		2			1979		7		2	182	Historical Observations								4.903	96.289			1979		0	2016	2017	2	1
257060	Epi	15095	Confirmed Eruption	South flank of Epi B	0			1979	5	7		2	182	Historical Observations								-16.68	168.37			1979		0	2016	2017	2	1
257050	Lopevi	15313	Confirmed Eruption	NW flank	2			1979		7		2		Historical Observations		1979		9		12		-16.507	168.346			1979	1979	1	2016	2017	2	1
241100	Ruapehu	14646	Confirmed Eruption		1			1979		6		30		Historical Observations		1979		7		15		-39.28	175.57			1979	1979	1	2016	2017	2	1
257040	Ambrym	15281	Confirmed Eruption	Benbow, Marum	2			1979		6		6		Historical Observations		1979		9	?	16	15	-16.25	168.12			1979	1979	1	2015	2016	2	1
282110	Asosan	17339	Confirmed Eruption	Naka-dake	2			1979		6		5	4	Historical Observations		1980		3		8		32.884	131.104			1979	1980	2	2015	2016	2	1
267020	Karangetang	16530	Confirmed Eruption	NNW flank, 1300 m (Kawah Maralebule)	1			1979		5		31		Historical Observations		1979		5		31		2.781	125.407			1979	1979	1	2015	2016	2	1
233020	Fournaise, Piton de la	14369	Confirmed Eruption	SE, SW and N flanks, Dolomieu & Bory	1			1979		5		28		Historical Observations		1979		7		14		-21.244	55.708			1979	1979	1	2015	2016	2	1
243102	Curacoa	14776	Confirmed Eruption	13 km north of Tafahi	1			1979		5		14		Historical Observations								-15.62	-173.67			1979		0	2015	2016	2	1
243070	Lateiki	14765	Confirmed Eruption		2			1979		5	<	10		Historical Observations		1979		7	>	21		-19.18	-174.87			1979	1979	1	2015	2016	2	1
284133	Fukujin	18438	Uncertain Eruption		0			1979		4		26				1980		5		12		21.93	143.47			1979	1980	2	2015	2016	2	1
290260	Chirinkotan	18828	Confirmed Eruption		2			1979		4		16	15	Historical Observations		1980		10		10		48.98	153.48			1979	1980	2	2015	2016	2	1
357140	Carran-Los Venados	12189	Confirmed Eruption	Mirador	2			1979		4		14		Historical Observations		1979		5		20		-40.35	-72.07			1979	1979	1	2014	2015	2	1
360150	Soufriere St. Vincent	12455	Confirmed Eruption		3			1979		4		13		Historical Observations		1979		10		26	5	13.33	-61.18			1979	1979	1	2014	2015	2	1
358060	Lautaro	12322	Confirmed Eruption		2	?		1979		3	<	8		Historical Observations								-49.019	-73.504			1979		0	2014	2015	2	1
263200	Dieng Volcanic Complex	15786	Confirmed Eruption	Sinila and Sigluduk	1			1979		2		20		Historical Observations		1979		2		20		-7.2	109.879			1979	1979	1	2014	2015	2	1
282090	Kirishimayama	17161	Confirmed Eruption	Shinmoe-dake	1			1979		2		16	60	Historical Observations								31.934	130.862			1979		0	2014	2015	2	1
242050	Monowai	14707	Confirmed Eruption		1			1979		2	?	16	15	Hydrophonic		1979		4	?	19		-25.887	-177.188			1979	1979	1	2014	2015	2	1
311360	Shishaldin	20088	Confirmed Eruption		2			1979		2		16	15	Historical Observations								54.756	-163.97			1979		0	2014	2015	2	1
300250	Bezymianny	19353	Confirmed Eruption		3			1979		2		11		Historical Observations								55.972	160.595			1979		0	2014	2015	2	1
311340	Westdahl	20045	Uncertain Eruption		3	?		1979		2		8				1979		2		9		54.516	-164.65			1979	1979	1	2013	2014	2	1
353060	Azul, Cerro	11728	Confirmed Eruption	East flank (300 m) and summit	2	?		1979		1		29		Historical Observations		1979		3	>	4		-0.92	-91.408			1979	1979	1	2013	2014	2	1
257040	Ambrym	15280	Confirmed Eruption	Benbow	2			1979		1		26	5	Historical Observations		1979		2	?	18		-16.25	168.12			1979	1979	1	2013	2014	2	1
251030	Karkar	14948	Confirmed Eruption	SE foot of Bagiai	2			1979		1	?	12		Historical Observations		1979		8		9		-4.649	145.964			1979	1979	1	2013	2014	2	1
285040	Shikotsu	18632	Confirmed Eruption	Tarumai (SE foot of summit dome)	1			1978		12		12		Historical Observations		1979		5		11		42.688	141.38			1978	1979	2	2012	2013	2	1
284120	Ioto	18414	Confirmed Eruption	West side (Asodai)	1			1978		12		11		Historical Observations		1978		12		11		24.751	141.289			1978	1978	1	2012	2013	2	1
257050	Lopevi	15312	Confirmed Eruption	Summit and NW flank	2			1978		11		22		Historical Observations		1979		3		16	15	-16.507	168.346			1978	1979	2	2012	2013	2	1
284096	Nishinoshima	18360	Uncertain Eruption	6.5 km NW of Nishino-shima	0			1978		11		16			?	1979		7		2	182	27.247	140.874			1978	1979	2	2012	2013	2	1
313020	Iliamna	20288	Discredited Eruption					1978		11		7				1978		11		7		60.032	-153.09			1978	1978	1	2012	2013	2	1
221126	Ardoukoba	13946	Confirmed Eruption		1			1978		11		7		Historical Observations		1978		11		14		11.58	42.47			1978	1978	1	2012	2013	2	1
311320	Akutan	20027	Confirmed Eruption		2			1978		9		25	5	Historical Observations		1978		10		16	15	54.134	-165.986			1978	1978	1	2012	2013	2	1
345040	Poas	11178	Confirmed Eruption		1			1978		9		22		Historical Observations		1978		12		16	15	10.2	-84.233			1978	1978	1	2012	2013	2	1
300250	Bezymianny	19352	Confirmed Eruption		2			1978		9		8	30	Historical Observations								55.972	160.595			1978		0	2012	2013	2	1
284133	Fukujin	18437	Uncertain Eruption		0			1978		8		24				1978		8		25		21.93	143.47			1978	1978	1	2011	2012	2	1
353010	Fernandina	11670	Confirmed Eruption	NW caldera bench	2			1978		8		8		Historical Observations		1978		8		26		-0.37	-91.55			1978	1978	1	2011	2012	2	1
273010	Bulusan	16764	Confirmed Eruption		2			1978		7		29		Historical Observations		1978		8		14		12.769	124.056			1978	1978	1	2011	2012	2	1
290030	Chachadake [Tiatia]	18742	Confirmed Eruption		2			1978		7		20		Historical Observations								44.353	146.252			1978		0	2011	2012	2	1
262000	Krakatau	15612	Confirmed Eruption	Anak Krakatau	1			1978		7		10		Historical Observations		1978		11		16	15	-6.102	105.423			1978	1978	1	2011	2012	2	1
272020	Kanlaon	16734	Confirmed Eruption		2			1978		6		27		Historical Observations		1978		9		2		10.412	123.132			1978	1978	1	2011	2012	2	1
255060	Kavachi	15167	Confirmed Eruption		2			1978		6		21		Historical Observations		1978		7		22	6	-8.991	157.979			1978	1978	1	2011	2012	2	1
358060	Lautaro	12321	Confirmed Eruption		1			1978		6		16	15	Historical Observations								-49.019	-73.504			1978		0	2011	2012	2	1
285040	Shikotsu	18631	Confirmed Eruption	Tarumai (SE foot of summit dome)	1			1978		5		14		Historical Observations		1978		5		17		42.688	141.38			1978	1978	1	2011	2012	2	1
252120	Ulawun	15053	Confirmed Eruption	Summit, lower east flank	3			1978		5		7		Historical Observations		1978		5		14		-5.05	151.33			1978	1978	1	2010	2011	2	1
211060	Etna	13804	Confirmed Eruption	SE Crater, SE and ENE flanks (3050-1675 m)	2			1978		4		29		Historical Observations		1978		11		30		37.748	14.999			1978	1978	1	2010	2011	2	1
344120	Concepcion	11066	Confirmed Eruption		2			1978		3	<	30		Historical Observations		1978		5	>	16	15	11.538	-85.622			1978	1978	1	2010	2011	2	1
273030	Mayon	16805	Confirmed Eruption		2			1978		3		7		Historical Observations		1978		9	?	16	15	13.257	123.685			1978	1978	1	2010	2011	2	1
241050	Okataina	14525	Confirmed Eruption	Waimangu (Raupo Pond, Inferno Crater)	1			1978		2		23		Historical Observations		1978		2		23		-38.12	176.5			1978	1978	1	2010	2011	2	1
267020	Karangetang	16529	Confirmed Eruption		1			1978		2		22		Historical Observations		1978		12		18		2.781	125.407			1978	1978	1	2010	2011	2	1
242050	Monowai	14706	Confirmed Eruption		0			1978		2		16	15	Hydrophonic		1978		7		16	15	-25.887	-177.188			1978	1978	1	2010	2011	2	1
311360	Shishaldin	20087	Confirmed Eruption		2			1978		2		8		Historical Observations		1978		2	?	9		54.756	-163.97			1978	1978	1	2009	2010	2	1
311340	Westdahl	20044	Confirmed Eruption	South of Westdahl Peak (1450 m)	3			1978		2		4		Historical Observations		1978		2		9		54.516	-164.65			1978	1978	1	2009	2010	2	1
284131	Minami-Hiyoshi	18427	Uncertain Eruption		0			1978		1	?	26				1978		3		24		23.5	141.935			1978	1978	1	2009	2010	2	1
263340	Raung	16145	Confirmed Eruption		1			1978		1		16	15	Historical Observations		1979		12	>	16	15	-8.119	114.056			1978	1979	2	2009	2010	2	1
274020	Didicas	16878	Confirmed Eruption	NNE side	2			1978		1		6		Historical Observations		1978		1		9		19.077	122.202			1978	1978	1	2009	2010	2	1
345040	Poas	11177	Confirmed Eruption		2			1977		12		18		Historical Observations		1978		6		15		10.2	-84.233			1977	1978	2	2009	2010	2	1
341040	Colima	10460	Confirmed Eruption		1			1977		12		16	15	Historical Observations		1982		6		16	15	19.514	-103.62			1977	1982	6	2009	2010	2	1
333060	Macdonald	10315	Confirmed Eruption		0			1977		12		10		Hydrophonic		1977		12		15		-28.98	-140.25			1977	1977	1	2008	2009	2	1
283180	Azumayama	17937	Confirmed Eruption	Issaikyo (Oana)	1			1977		12		7		Historical Observations		1977		12		7		37.735	140.244			1977	1977	1	2008	2009	2	1
266110	Mahawu	16470	Confirmed Eruption		0			1977		11		16		Historical Observations								1.352	124.865			1977		0	2008	2009	2	1
360160	Kick 'em Jenny	12465	Confirmed Eruption		0			1977		11		11		Hydrophonic								12.3	-61.64			1977		0	2008	2009	2	1
233020	Fournaise, Piton de la	14368	Confirmed Eruption	ENE flank (2050-2200 m, 1850-1920 m)	1			1977		10		24		Historical Observations		1977		11		17		-21.244	55.708			1977	1977	1	2008	2009	2	1
242050	Monowai	14705	Confirmed Eruption		0			1977		10		17		Historical Observations		1977		10	?	27		-25.887	-177.188			1977	1977	1	2008	2009	2	1
284080	Sumisujima	18339	Uncertain Eruption		0			1977		10		16	15			1977		10		16	15	31.44	140.051			1977	1977	1	2007	2008	2	1
344020	San Cristobal	10883	Confirmed Eruption		2			1977		10		16		Historical Observations		1977		10		16		12.702	-87.004			1977	1977	1	2007	2008	2	1
284133	Fukujin	18436	Uncertain Eruption		0			1977		10		14				1978		3		24		21.93	143.47			1977	1978	2	2007	2008	2	1
273070	Taal	16860	Confirmed Eruption	SW flank (near Mt. Tabaro)	2			1977		10		3		Historical Observations		1977		11	?	12		14.002	120.993			1977	1977	1	2007	2008	2	1
332010	Kilauea	10114	Confirmed Eruption	East rift zone (near Kalalua Crater)	0			1977		9		13		Historical Observations		1977		10		1		19.421	-155.287			1977	1977	1	2007	2008	2	1
342090	Fuego	10730	Confirmed Eruption		2			1977		9		11		Historical Observations		1979		8		8		14.473	-90.88			1977	1979	3	2007	2008	2	1
257040	Ambrym	15279	Confirmed Eruption		2			1977		8		16	15	Historical Observations		1977		9		30		-16.25	168.12			1977	1977	1	2007	2008	2	1
285030	Toya	18601	Confirmed Eruption	Usu-Shinzan	3			1977		8		7		Historical Observations		1982		3		16	15	42.544	140.839			1977	1982	6	2007	2008	2	1
300260	Klyuchevskoy	19460	Confirmed Eruption	Summit, NE flank (1700 m)	3			1977		8		2		Historical Observations		1980		3		12		56.056	160.642			1977	1980	4	2006	2007	2	1
255060	Kavachi	15166	Confirmed Eruption		1			1977		7	?	17		Historical Observations		1977		7		22		-8.991	157.979			1977	1977	1	2006	2007	2	1
241100	Ruapehu	14645	Confirmed Eruption		2			1977		7		16		Historical Observations		1979		1		17		-39.28	175.57			1977	1979	3	2006	2007	2	1
241080	Tongariro	14605	Confirmed Eruption	Ngauruhoe	1			1977		7		4		Historical Observations		1977		7		4		-39.157	175.632			1977	1977	1	2006	2007	2	1
263340	Raung	16144	Confirmed Eruption		2			1977		6		9		Historical Observations		1977		6		30		-8.119	114.056			1977	1977	1	2006	2007	2	1
345040	Poas	11176	Confirmed Eruption		1			1977		5		16	15	Historical Observations		1977		7	?	16	15	10.2	-84.233			1977	1977	1	2006	2007	2	1
373080	Krafla	12949	Confirmed Eruption	3 km north of Leirhnjúkur	1			1977		4		27		Historical Observations		1977		9		8		65.715	-16.728			1977	1977	1	2006	2007	2	1
242050	Monowai	14704	Confirmed Eruption		0			1977		4		16	15	Hydrophonic		1977		4		16	15	-25.887	-177.188			1977	1977	1	2006	2007	2	1
257020	Gaua	15227	Confirmed Eruption	Mt. Garat	2			1977		4		13		Historical Observations		1977		4		13		-14.27	167.5			1977	1977	1	2006	2007	2	1
282110	Asosan	17338	Confirmed Eruption	Naka-dake	2			1977		4		11		Historical Observations		1978		8		16	15	32.884	131.104			1977	1978	2	2006	2007	2	1
233010	Karthala	14203	Confirmed Eruption	SW flank	1			1977		4		5		Historical Observations		1977		4		10		-11.75	43.38			1977	1977	1	2006	2007	2	1
344120	Concepcion	11065	Confirmed Eruption		2			1977		4		4		Historical Observations		1977		5		3		11.538	-85.622			1977	1977	1	2005	2006	2	1
312131	Ukinrek Maars	20206	Confirmed Eruption	West and East Ukinrek Maars	3			1977		3		30		Historical Observations		1977		4		9		57.832	-156.51			1977	1977	1	2005	2006	2	1
300250	Bezymianny	19351	Confirmed Eruption		3			1977		3		25		Historical Observations								55.972	160.595			1977		0	2005	2006	2	1
233020	Fournaise, Piton de la	14367	Confirmed Eruption	NE and SE of Dolomieu, NE rift zone	0			1977		3		24		Historical Observations		1977		4		16		-21.244	55.708			1977	1977	1	2005	2006	2	1
353010	Fernandina	11669	Confirmed Eruption	SE caldera bench	1			1977		3		23		Historical Observations		1977		3		27		-0.37	-91.55			1977	1977	1	2005	2006	2	1
351060	Purace	11339	Confirmed Eruption		2			1977		3		19		Historical Observations		1977		3	?	28		2.32	-76.4			1977	1977	1	2005	2006	2	1
311180	Seguam	19780	Confirmed Eruption	Pyre Peak (2.5 km SE of summit)	1			1977		3		6		Historical Observations		1977		3	?	8		52.315	-172.51			1977	1977	1	2005	2006	2	1
342090	Fuego	10729	Confirmed Eruption		1			1977		3		3		Historical Observations		1977		4		19		14.473	-90.88			1977	1977	1	2005	2006	2	1
345060	Irazu	11231	Confirmed Eruption		1			1977		3		3		Historical Observations								9.979	-83.852			1977		0	2005	2006	2	1
255060	Kavachi	15165	Confirmed Eruption		1			1977		2		22		Historical Observations								-8.991	157.979			1977		0	2005	2006	2	1
257070	Kuwae	15348	Uncertain Eruption	Karua	0			1977		2		1										-16.829	168.536			1977		0	2005	2006	2	1
357120	Villarrica	12166	Confirmed Eruption		1			1977		1		26		Historical Observations		1977		1		30		-39.42	-71.93			1977	1977	1	2004	2005	2	1
257040	Ambrym	15278	Confirmed Eruption		2			1977		1		20	5	Historical Observations		1977		1	?	28		-16.25	168.12			1977	1977	1	2004	2005	2	1
360160	Kick 'em Jenny	12464	Confirmed Eruption		0	?		1977		1		14		Hydrophonic		1977		1		14		12.3	-61.64			1977	1977	1	2004	2005	2	1
223030	Nyiragongo	14101	Confirmed Eruption	North, south, and west flanks	1			1977		1		10		Historical Observations		1977		1		10		-1.52	29.25			1977	1977	1	2004	2005	2	1
223020	Nyamulagira	14068	Confirmed Eruption	SSW flank (Murara and Harakandi)	1			1976		12		23		Historical Observations		1977		6		15	5	-1.408	29.2			1976	1977	2	2004	2005	2	1
284131	Minami-Hiyoshi	18426	Uncertain Eruption	Hiyoshi-Okinoba (also 23.48 N 141.67 E)	0			1976		12		20				1977		3		28		23.5	141.935			1976	1977	2	2004	2005	2	1
241040	Whakaari/White Island	14487	Confirmed Eruption	Christmas, Gibrus, and 1978 craters	3			1976		12		18		Historical Observations		1982		1		29		-37.52	177.18			1976	1982	7	2004	2005	2	1
343100	San Miguel	10862	Confirmed Eruption		1			1976		12		2		Historical Observations		1977		3		1		13.434	-88.269			1976	1977	2	2004	2005	2	1
258010	Matthew Island	15362	Uncertain Eruption		1	?		1976		11		27										-22.33	171.32			1976		0	2003	2004	2	1
344040	Telica	10929	Confirmed Eruption		1			1976		11		3		Historical Observations		1978		1	>	16	15	12.606	-86.84			1976	1978	3	2003	2004	2	1
233020	Fournaise, Piton de la	14366	Confirmed Eruption	North of Dolomieu (2250-2330 m)	1			1976		11		2		Historical Observations		1976		11	?	4		-21.244	55.708			1976	1976	1	2003	2004	2	1
311320	Akutan	20025	Confirmed Eruption		2			1976		10		15	45	Historical Observations		1977		5	>	9		54.134	-165.986			1976	1977	2	2003	2004	2	1
290240	Sarychev Peak	18816	Confirmed Eruption		2			1976		9		23		Historical Observations		1976		10		2		48.092	153.2			1976	1976	1	2003	2004	2	1
267020	Karangetang	16528	Confirmed Eruption	South flank (1100 m) and summit	2			1976		9		15		Historical Observations		1977		9		16	15	2.781	125.407			1976	1977	2	2003	2004	2	1
241100	Ruapehu	14644	Confirmed Eruption		1			1976		9	<	12		Historical Observations		1976		11	?	22		-39.28	175.57			1976	1976	1	2002	2003	2	1
273070	Taal	16859	Confirmed Eruption	SW flank (near Mt. Tabaro)	2			1976		9		3		Historical Observations		1976		10		17		14.002	120.993			1976	1976	1	2002	2003	2	1
344020	San Cristobal	10882	Confirmed Eruption		1			1976		8		29		Historical Observations		1976		8		29		12.702	-87.004			1976	1976	1	2002	2003	2	1
255060	Kavachi	15164	Confirmed Eruption		1			1976		8		24		Historical Observations		1976		10		13		-8.991	157.979			1976	1976	1	2002	2003	2	1
241080	Tongariro	14604	Confirmed Eruption	Ngauruhoe	1			1976		8		23		Historical Observations		1976		8		28		-39.157	175.632			1976	1976	1	2002	2003	2	1
284080	Sumisujima	18338	Uncertain Eruption		0			1976		8		16	15			1976		8		16	15	31.44	140.051			1976	1976	1	2002	2003	2	1
284133	Fukujin	18435	Uncertain Eruption	21.95 N 143.45 E	0			1976		8		2				1977		4		21		21.93	143.47			1976	1977	2	2002	2003	2	1
284130	Fukutoku-Oka-no-Ba	17599	Uncertain Eruption		0			1976		8		2				1985		12		23		24.285	141.481			1976	1985	10	2001	2002	2	1
360060	Soufriere Guadeloupe	12368	Confirmed Eruption	SE side of summit (Gouffre Tarissan)	2			1976		7		8		Historical Observations		1977		3		1		16.044	-61.664			1976	1977	2	2001	2002	2	1
311161	Korovin	19758	Uncertain Eruption					1976		7		2	182									52.381	-174.166			1976		0	2001	2002	2	1
345040	Poas	11175	Confirmed Eruption		2			1976		6		21		Historical Observations		1976		11		16	15	10.2	-84.233			1976	1976	1	2001	2002	2	1
263340	Raung	16143	Confirmed Eruption		2			1976		6		7		Historical Observations		1976		11		21		-8.119	114.056			1976	1976	1	2001	2002	2	1
257050	Lopevi	15311	Confirmed Eruption		1			1976		5		1		Historical Observations		1976		9		5		-16.507	168.346			1976	1976	1	2001	2002	2	1
282050	Kuchinoerabujima	16978	Confirmed Eruption	Shindake	2			1976		4		2		Historical Observations		1976		4		2		30.443	130.217			1976	1976	1	2001	2002	2	1
264010	Batur	16203	Uncertain Eruption		1	?		1976		3		26				1976		3		26		-8.242	115.375			1976	1976	1	2000	2001	2	1
300250	Bezymianny	19350	Confirmed Eruption		2			1976		3		25		Historical Observations								55.972	160.595			1976		0	2000	2001	2	1
344020	San Cristobal	10881	Confirmed Eruption		1			1976		3		9		Historical Observations		1976		3		16		12.702	-87.004			1976	1976	1	2000	2001	2	1
264250	Iliwerung	16347	Uncertain Eruption	Hobal (submarine vent on SE flank)	0			1976		3		8										-8.53	123.57			1976		0	2000	2001	2	1
241100	Ruapehu	14643	Confirmed Eruption		1			1976		3		6		Historical Observations		1976		3		6		-39.28	175.57			1976	1976	1	2000	2001	2	1
283120	Kusatsu-Shiranesan	17842	Confirmed Eruption	NE corner of Mizu-gama Crater	1			1976		3		2		Historical Observations		1976		3		2		36.618	138.528			1976	1976	1	2000	2001	2	1
284131	Minami-Hiyoshi	18425	Uncertain Eruption		0			1976		2		16	15									23.5	141.935			1976		0	2000	2001	2	1
313010	Augustine	20272	Confirmed Eruption		4			1976		1	?	22		Historical Observations		1977		5	?	14		59.363	-153.43			1976	1977	2	2000	2001	2	1
311360	Shishaldin	20086	Confirmed Eruption		2			1976		1		16	15	Historical Observations		1976		9		28		54.756	-163.97			1976	1976	1	2000	2001	2	1
284120	Ioto	18413	Confirmed Eruption	West side (Asodai)	1			1976		1		16	15	Historical Observations								24.751	141.289			1976		0	1999	2000	2	1
257020	Gaua	15226	Confirmed Eruption	Mt. Garat	2			1976		1		15	5	Historical Observations								-14.27	167.5			1976		0	1999	2000	2	1
352010	Reventador	11445	Confirmed Eruption		2			1976		1		4		Historical Observations		1976		5		16	15	-0.077	-77.656			1976	1976	1	1999	2000	2	1
251050	Long Island	14964	Confirmed Eruption	Motmot	1			1976		1		2	120	Historical Observations								-5.358	147.12			1976		0	1999	2000	2	1
331021	Axial Seamount	20922	Confirmed Eruption		0			1976	6	1		1		Historical Observations	<	1982						45.95	-130			1976	1982	7	1999	2000	2	1
373080	Krafla	12948	Confirmed Eruption	1.5-2.5 km north of Leirhnjúkur	0			1975		12		20		Historical Observations		1975		12		20		65.715	-16.728			1975	1975	1	1999	2000	2	1
341040	Colima	10469	Confirmed Eruption		2			1975		12	?	11		Historical Observations		1976		6		20		19.514	-103.62			1975	1976	2	1999	2000	2	1
332010	Kilauea	10113	Confirmed Eruption	Kilauea Caldera, Halemaumau	0			1975		11		29		Historical Observations		1975		11		29		19.421	-155.287			1975	1975	1	1999	2000	2	1
284134	Kasuga 1	18443	Uncertain Eruption	21.78 N 143.71 E	0			1975		11		16	15									21.765	143.71			1975		0	1998	1999	2	1
266100	Lokon-Empung	16455	Confirmed Eruption	Tompaluan	2			1975		11	<	16	15	Historical Observations		1980		7		2	182	1.358	124.792			1975	1980	6	1998	1999	2	1
233020	Fournaise, Piton de la	14365	Confirmed Eruption	Dolomieu and SE flank (1320-2350 m)	1			1975		11		4		Historical Observations		1976		4		6		-21.244	55.708			1975	1976	2	1998	1999	2	1
241100	Ruapehu	14642	Confirmed Eruption		1			1975		10	<	17		Historical Observations		1975		10	<	17		-39.28	175.57			1975	1975	1	1998	1999	2	1
282110	Asosan	17337	Confirmed Eruption	Naka-dake	1			1975		10		16	15	Historical Observations		1976		1		13		32.884	131.104			1975	1976	2	1998	1999	2	1
284090	Izu-Torishima	18371	Confirmed Eruption	9 km S of Torishima	2			1975		10		2		Historical Observations								30.484	140.303			1975		0	1997	1998	2	1
311240	Cleveland	19807	Uncertain Eruption					1975		9		16	15									52.825	-169.944			1975		0	1997	1998	2	1
311360	Shishaldin	20085	Confirmed Eruption		2			1975		9		13		Historical Observations		1975		10		26	5	54.756	-163.97			1975	1975	1	1996	1997	2	1
312030	Pavlof	20141	Confirmed Eruption		2			1975		9		13		Historical Observations		1977		3	>	16	15	55.417	-161.894			1975	1977	3	1996	1997	2	1
284131	Minami-Hiyoshi	18424	Confirmed Eruption	23.50 N 141.92 E	0			1975		8		25		Historical Observations								23.5	141.935			1975		0	1996	1997	2	1
332000	Loihi	20729	Uncertain Eruption		0			1975		8	?	24				1975		11		16	15	18.92	-155.27			1975	1975	1	1996	1997	2	1
255060	Kavachi	15163	Confirmed Eruption		1			1975		8		16	15	Historical Observations								-8.991	157.979			1975		0	1996	1997	2	1
284080	Sumisujima	18337	Uncertain Eruption		0			1975		8		13				1975		9		26		31.44	140.051			1975	1975	1	1996	1997	2	1
332020	Mauna Loa	10225	Confirmed Eruption	Mokuaweoweo and NE and SW rift zones,	0			1975		7		5		Historical Observations		1975		7		6		19.475	-155.608			1975	1975	1	1995	1996	2	1
284096	Nishinoshima	18359	Uncertain Eruption		0			1975		7		2	182			1977		7		2	182	27.247	140.874			1975	1977	3	1995	1996	2	1
284091	Sofugan	18357	Uncertain Eruption		0			1975		7		2	182									29.794	140.342			1975		0	1994	1995	2	1
390070	Southern Thule	13201	Confirmed Eruption	South flank of Bellinghausen Island	1	?		1975	11	7		2	182	Historical Observations								-59.442	-27.225			1975		0	1994	1995	2	1
300240	Tolbachik	19323	Confirmed Eruption	South flank (18 & 28 km from summit)	4	+		1975		6		28		Historical Observations		1976		12		10		55.832	160.326			1975	1976	2	1994	1995	2	1
342090	Fuego	10728	Confirmed Eruption		1			1975		5		28		Historical Observations		1975		10		21		14.473	-90.88			1975	1975	1	1994	1995	2	1
344040	Telica	10928	Confirmed Eruption		0			1975		5		16	15	Historical Observations		1976		3		16	15	12.606	-86.84			1975	1976	2	1994	1995	2	1
284210	Esmeralda Bank	18543	Uncertain Eruption		0			1975		4		26				1975		4		29		15	145.25			1975	1975	1	1994	1995	2	1
241100	Ruapehu	14641	Confirmed Eruption		2			1975		4		24		Historical Observations		1975		4		27		-39.28	175.57			1975	1975	1	1994	1995	2	1
262000	Krakatau	15611	Confirmed Eruption	Anak Krakatau	2			1975		3		27		Historical Observations		1975		10		26	5	-6.102	105.423			1975	1975	1	1994	1995	2	1
263340	Raung	16142	Confirmed Eruption		1			1975		3		16	15	Historical Observations		1975		5		16	15	-8.119	114.056			1975	1975	1	1993	1994	2	1
257050	Lopevi	15310	Confirmed Eruption	Summit and NW flank	2			1975		3		6	3	Historical Observations		1975		6		23		-16.507	168.346			1975	1975	1	1993	1994	2	1
211060	Etna	13803	Confirmed Eruption	North flank (2625 m)	1			1975		2		24		Historical Observations		1975		8		29		37.748	14.999			1975	1975	1	1993	1994	2	1
241080	Tongariro	14603	Confirmed Eruption	Ngauruhoe	3			1975		2		12		Historical Observations		1975		2		23		-39.157	175.632			1975	1975	1	1993	1994	2	1
261140	Marapi	15468	Confirmed Eruption	Verbeek Crater, B and C Craters	2			1975		1		16	15	Historical Observations		1979		9		11		-0.38	100.474			1975	1979	5	1993	1994	2	1
332010	Kilauea	10112	Confirmed Eruption	SW rift zone (1095 m)	0			1974		12		31		Historical Observations		1974		12		31		19.421	-155.287			1974	1974	1	1993	1994	2	1
251030	Karkar	14947	Confirmed Eruption	Bagiai	2			1974		12	?	30		Historical Observations		1975		6		26		-4.649	145.964			1974	1975	2	1992	1993	2	1
284130	Fukutoku-Oka-no-Ba	17598	Confirmed Eruption		2			1974		12		24		Historical Observations	?	1975		11		13		24.285	141.481			1974	1975	2	1992	1993	2	1
257060	Epi	15094	Uncertain Eruption	Epi A and Epi B	0			1974		11		16	15			1974		11		16	15	-16.68	168.37			1974	1974	1	1992	1993	2	1
255060	Kavachi	15162	Confirmed Eruption		1			1974		11		12		Historical Observations		1974		12	?	12		-8.991	157.979			1974	1974	1	1992	1993	2	1
251070	Ritter Island	14974	Confirmed Eruption	600-900 m W of Ritter Island	1			1974		10		17		Historical Observations		1974		10		17		-5.519	148.115			1974	1974	1	1992	1993	2	1
342090	Fuego	10727	Confirmed Eruption		4			1974		10		10		Historical Observations		1974		12		4		14.473	-90.88			1974	1974	1	1992	1993	2	1
211060	Etna	13801	Confirmed Eruption	NE Crater	2			1974		9	?	29		Historical Observations		1978		3		29		37.748	14.999			1974	1978	5	1991	1992	2	1
332010	Kilauea	10111	Confirmed Eruption	Kilauea Caldera (Halemaumau and to SW)	0			1974		9		19		Historical Observations		1974		9		19		19.421	-155.287			1974	1974	1	1991	1992	2	1
345040	Poas	11174	Confirmed Eruption		2			1974		9		11		Historical Observations		1975		2		16	15	10.2	-84.233			1974	1975	2	1991	1992	2	1
241040	Whakaari/White Island	14486	Confirmed Eruption	SE of Donald Mound,	2			1974		9		8	10	Historical Observations								-37.52	177.18			1974		0	1991	1992	2	1
360160	Kick 'em Jenny	12463	Confirmed Eruption		0			1974		9		5		Historical Observations		1974		9		6		12.3	-61.64			1974	1974	1	1991	1992	2	1
312030	Pavlof	20140	Confirmed Eruption		3			1974		9	<	1		Historical Observations		1975		1		13		55.417	-161.894			1974	1975	2	1991	1992	2	1
222120	Lengai, Ol Doinyo	14022	Discredited Eruption					1974		8		16	15			1974		9		16	15	-2.764	35.914			1974	1974	1	1991	1992	2	1
283090	Niigata-Yakeyama	17546	Confirmed Eruption	WNW and NNE side of lava dome	2			1974		7		28		Historical Observations		1974		7		28		36.921	138.036			1974	1974	1	1990	1991	2	1
222010	Central Island	13959	Uncertain Eruption	East side of Central Island	1			1974		7	?	22				1974		7		27	1	3.496	36.04			1974	1974	1	1990	1991	2	1
332010	Kilauea	10110	Confirmed Eruption	Kilauea Caldera, Keanakakoi	0			1974		7		19		Historical Observations		1974		7		22		19.421	-155.287			1974	1974	1	1990	1991	2	1
355100	Lascar	11862	Uncertain Eruption		1			1974		7		16	15			1974		9		16	15	-23.37	-67.73			1974	1974	1	1990	1991	2	1
312160	Trident	20236	Confirmed Eruption	SW flank	3			1974		7		15	45	Historical Observations								58.236	-155.1			1974		0	1989	1990	2	1
284080	Sumisujima	18336	Uncertain Eruption		0			1974		7		6				1974		7		6		31.44	140.051			1974	1974	1	1989	1990	2	1
290030	Chachadake [Tiatia]	18741	Discredited Eruption					1974		7		2	182			1975		7		2	182	44.353	146.252			1974	1975	2	1989	1990	2	1
351080	Galeras	11371	Confirmed Eruption		1	?		1974		7		2	182	Historical Observations		1983		7	?	2	182	1.22	-77.37			1974	1983	10	1989	1990	2	1
263340	Raung	16141	Confirmed Eruption		2			1974		6		15		Historical Observations		1974		7	?	17		-8.119	114.056			1974	1974	1	1989	1990	2	1
282050	Kuchinoerabujima	16977	Confirmed Eruption	Shindake	1			1974		6		3		Historical Observations		1974		6		3		30.443	130.217			1974	1974	1	1988	1989	2	1
263180	Slamet	15257	Uncertain Eruption		2			1974		5		29				1974		5		29		-7.242	109.208			1974	1974	1	1988	1989	2	1
300260	Klyuchevskoy	19459	Confirmed Eruption	Summit and SW flank (3400-3600 m)	3			1974		4		8		Historical Observations		1974		12	?	16	15	56.056	160.642			1974	1974	1	1988	1989	2	1
312030	Pavlof	20139	Confirmed Eruption		1			1974		3		12		Historical Observations		1974		3	?	24		55.417	-161.894			1974	1974	1	1988	1989	2	1
264010	Batur	16202	Confirmed Eruption	Batur III	2			1974		3		12		Historical Observations		1974		4		16	15	-8.242	115.375			1974	1974	1	1988	1989	2	1
251020	Manam	14927	Confirmed Eruption	South Crater, Main Crater	3			1974		3	?	4		Historical Observations		1999		11	?	9		-4.08	145.037			1974	1999	26	1987	1988	2	1
345060	Irazu	11230	Discredited Eruption					1974		3		2				1974		3		7		9.979	-83.852			1974	1974	1	1987	1988	2	1
283220	Chokaisan	18034	Confirmed Eruption	E side of Shinzan, W of Kojin-yama	1			1974		3		1		Historical Observations		1974		4		30		39.099	140.049			1974	1974	1	1987	1988	2	1
284010	Izu-Oshima	18241	Confirmed Eruption	Mihara-yama	1			1974		2		28		Historical Observations		1974		6		20		34.724	139.394			1974	1974	1	1986	1987	2	1
261230	Dempo	15572	Confirmed Eruption		2			1974		2		26		Historical Observations		1974		10		20		-4.016	103.121			1974	1974	1	1986	1987	2	1
311120	Great Sitkin	19739	Confirmed Eruption		2			1974		2		19		Historical Observations		1974		9		16	15	52.076	-176.13			1974	1974	1	1986	1987	2	1
243100	Fonualei	14784	Uncertain Eruption		1			1974		2		16										-18.023	-174.317			1974		0	1986	1987	2	1
251030	Karkar	14946	Confirmed Eruption	Bagiai	2			1974		2		14		Historical Observations		1974		8		8		-4.649	145.964			1974	1974	1	1985	1986	2	1
311320	Akutan	20024	Confirmed Eruption	West flank ?	2			1974		2	<	11		Historical Observations								54.134	-165.986			1974		0	1985	1986	2	1
257070	Kuwae	15347	Confirmed Eruption	Karua	0			1974		2		4	4	Historical Observations		1974		9	?	16	15	-16.829	168.536			1974	1974	1	1985	1986	2	1
211060	Etna	13800	Confirmed Eruption	West flank (1670 m and 1650 m)	2			1974		1		30		Historical Observations		1974		3		29		37.748	14.999			1974	1974	1	1985	1986	2	1
257050	Lopevi	15309	Confirmed Eruption	Summit and NW flank	2			1974		1		16	15	Historical Observations		1974		10		7		-16.507	168.346			1974	1974	1	1985	1986	2	1
284120	Ioto	18412	Uncertain Eruption	NW of Iwo-jima (Kaiseinishinoba)	0			1974		1		16	15			1974		2		2		24.751	141.289			1974	1974	1	1985	1986	2	1
344120	Concepcion	11064	Confirmed Eruption		2			1973		12		24		Historical Observations		1974		1		12		11.538	-85.622			1973	1974	2	1985	1986	2	1
284130	Fukutoku-Oka-no-Ba	17597	Confirmed Eruption	3.8 km NNE of Minami-Iwo-jima	2			1973		12		18		Historical Observations		1974		2		16		24.285	141.481			1973	1974	2	1984	1985	2	1
353010	Fernandina	11668	Confirmed Eruption	ESE caldera wall	2			1973		12		9		Historical Observations		1973		12		16	1	-0.37	-91.55			1973	1973	1	1984	1985	2	1
264250	Iliwerung	16346	Confirmed Eruption	Hobal (submarine vent on SE flank)	2			1973		12		5		Historical Observations		1974		8		22		-8.53	123.57			1973	1974	2	1984	1985	2	1
352010	Reventador	11444	Confirmed Eruption		3			1973		11		16	15	Historical Observations		1974		7		16	15	-0.077	-77.656			1973	1974	2	1984	1985	2	1
312030	Pavlof	20138	Confirmed Eruption	Upper NE flank	2			1973		11		12		Historical Observations		1973		11		13		55.417	-161.894			1973	1973	1	1984	1985	2	1
332010	Kilauea	10109	Confirmed Eruption	East rift zone, Pauahi	0			1973		11		10		Historical Observations		1973		12		9		19.421	-155.287			1973	1973	1	1984	1985	2	1
282050	Kuchinoerabujima	16976	Confirmed Eruption	Shindake	2			1973		11		5		Historical Observations		1973		11		19		30.443	130.217			1973	1973	1	1984	1985	2	1
241100	Ruapehu	14640	Confirmed Eruption		1			1973		10		31		Historical Observations		1974		10		25		-39.28	175.57			1973	1974	2	1984	1985	2	1
264150	Paluweh	16269	Confirmed Eruption		2			1973		10		27		Historical Observations		1973		10		28		-8.32	121.708			1973	1973	1	1984	1985	2	1
353020	Wolf	11689	Uncertain Eruption					1973		10		25				1973		10		29		0.02	-91.35			1973	1973	1	1983	1984	2	1
300240	Tolbachik	19322	Uncertain Eruption		1	?		1973		10		16	15			1974		12		16	15	55.832	160.326			1973	1974	2	1983	1984	2	1
241130	Rumble III	14674	Confirmed Eruption		0			1973		10		15		Hydrophonic		1973		10		17		-35.745	178.478			1973	1973	1	1983	1984	2	1
257020	Gaua	15225	Confirmed Eruption	Mt. Garat (upper SE flank)	2			1973		10		9		Historical Observations		1974		1		21		-14.27	167.5			1973	1974	2	1983	1984	2	1
252120	Ulawun	15052	Confirmed Eruption		2			1973		10		4		Historical Observations		1973		10		19		-5.05	151.33			1973	1973	1	1983	1984	2	1
284133	Fukujin	18434	Confirmed Eruption	21.93 N 143.46 E	1			1973		9		27		Historical Observations		1974		3		5		21.93	143.47			1973	1974	2	1983	1984	2	1
266100	Lokon-Empung	16454	Confirmed Eruption	Tompaluan	1			1973		9		15		Historical Observations		1974		12		16	15	1.358	124.792			1973	1974	2	1983	1984	2	1
311161	Korovin	19757	Confirmed Eruption		0			1973		8		25	2	Historical Observations								52.381	-174.166			1973		0	1983	1984	2	1
263180	Slamet	13404	Confirmed Eruption		1	?		1973		8		16	15	Historical Observations								-7.242	109.208			1973		0	1982	1983	2	1
290360	Chikurachki	18853	Confirmed Eruption		2			1973		8		10		Historical Observations		1973		9		28		50.324	155.461			1973	1973	1	1982	1983	2	1
290120	Kolokol Group	18774	Confirmed Eruption	Berg (northern part of lava dome)	1			1973		7		25		Historical Observations		1973		7	?	26		46.042	150.083			1973	1973	1	1982	1983	2	1
261140	Marapi	15467	Confirmed Eruption	Verbeek Crater	2			1973		7		24		Historical Observations		1973		7		24		-0.38	100.474			1973	1973	1	1981	1982	2	1
357070	Chillan, Nevados de	11991	Confirmed Eruption	Volcán Arrau (SE flank of Volcán Nuevo)	2			1973		7		16	15	Historical Observations		1986		7		2	182	-36.868	-71.378			1973	1986	14	1981	1982	2	1
290030	Chachadake [Tiatia]	18740	Confirmed Eruption	NNW and SSE flanks	4			1973		7		14		Historical Observations		1973		7		28		44.353	146.252			1973	1973	1	1981	1982	2	1
243102	Curacoa	14775	Confirmed Eruption	6.4 km SW of Curacoa Reef	3			1973		7		11		Historical Observations		1973		7		16		-15.62	-173.67			1973	1973	1	1981	1982	2	1
244000	Vailulu'u	14801	Confirmed Eruption		0			1973		7		10		Hydrophonic		1973		7		10		-14.215	-169.058			1973	1973	1	1980	1981	2	1
290390	Alaid	18886	Uncertain Eruption					1973		7		2	182									50.861	155.565			1973		0	1980	1981	2	1
290070	Etorofu-Yakeyama [Grozny Group]	18753	Confirmed Eruption	Ivan Grozny (N flank of cent. dome)	2	?		1973		5		16		Historical Observations		1973		5		17		45.012	147.871			1973	1973	1	1980	1981	2	1
263340	Raung	16140	Confirmed Eruption		1			1973		5		16	15	Historical Observations		1973		10		16	15	-8.119	114.056			1973	1973	1	1980	1981	2	1
351080	Galeras	11370	Uncertain Eruption		2			1973		5		16	15									1.22	-77.37			1973		0	1980	1981	2	1
233020	Fournaise, Piton de la	14364	Confirmed Eruption	Dolomieu (SSW wall)	2			1973		5		10		Historical Observations		1973		9	?	5		-21.244	55.708			1973	1973	1	1980	1981	2	1
257060	Epi	13366	Uncertain Eruption		0			1973		5		5	4			1973		10		26	5	-16.68	168.37			1973	1973	1	1979	1980	2	1
257070	Kuwae	15346	Uncertain Eruption	Karua	0			1973		5		5	4			1973		10		16	15	-16.829	168.536			1973	1973	1	1979	1980	2	1
332010	Kilauea	10108	Confirmed Eruption	East rift zone, Pauahi, Hiiaka	0			1973		5		5		Historical Observations		1973		5		5		19.421	-155.287			1973	1973	1	1979	1980	2	1
251050	Long Island	14963	Confirmed Eruption	Motmot	2			1973		4		16	15	Historical Observations		1974		2		28		-5.358	147.12			1973	1974	2	1979	1980	2	1
264220	Iliboleng	16321	Confirmed Eruption		2			1973		4		16	15	Historical Observations		1974		4		16	15	-8.342	123.258			1973	1974	2	1979	1980	2	1
257040	Ambrym	15277	Confirmed Eruption	Benbow, Mbuelesu, Marum	3			1973		4		15	5	Historical Observations		1976		10		14		-16.25	168.12			1973	1976	4	1979	1980	2	1
284096	Nishinoshima	18358	Confirmed Eruption	East of Nishino-shima	2			1973		4		12		Historical Observations		1974		5		5	4	27.247	140.874			1973	1974	2	1979	1980	2	1
264010	Batur	16201	Uncertain Eruption		1			1973		3		30	90	Historical Observations								-8.242	115.375			1973		0	1979	1980	2	1
311320	Akutan	20023	Confirmed Eruption		2			1973		3	?	16	15	Historical Observations		1973		5		16	15	54.134	-165.986			1973	1973	1	1978	1979	2	1
252010	Langila	14997	Confirmed Eruption	Crater 3, Crater 2	3			1973		2		24	4	Historical Observations		2000		10	>	16	15	-5.525	148.42			1973	2000	28	1978	1979	2	1
342090	Fuego	10726	Confirmed Eruption		2			1973		2		23		Historical Observations		1973		3		23		14.473	-90.88			1973	1973	1	1978	1979	2	1
241050	Okataina	14524	Confirmed Eruption	Waimangu (Echo Crater)	1			1973		2		22		Historical Observations		1973		2		22		-38.12	176.5			1973	1973	1	1978	1979	2	1
283110	Asamayama	17804	Confirmed Eruption		2			1973		2		1		Historical Observations		1973		5		24		36.406	138.523			1973	1973	1	1977	1978	2	1
341040	Colima	10468	Uncertain Eruption		1			1973		1		30										19.514	-103.62			1973		0	1977	1978	2	1
261230	Dempo	15571	Confirmed Eruption		2			1973		1		24		Historical Observations		1973		1		25		-4.016	103.121			1973	1973	1	1977	1978	2	1
372010	Vestmannaeyjar	12558	Confirmed Eruption	Heimaey (Eldfell)	3			1973		1		23		Historical Observations		1973		6		28		63.416	-20.266			1973	1973	1	1976	1977	2	1
282110	Asosan	17336	Confirmed Eruption	Naka-dake	2			1973		1		16	15	Historical Observations		1975		6		16	15	32.884	131.104			1973	1975	3	1976	1977	2	1
290070	Etorofu-Yakeyama [Grozny Group]	18752	Confirmed Eruption	Ivan Grozny	1			1973		1		16	15	Historical Observations		1973		1		16	15	45.012	147.871			1973	1973	1	1976	1977	2	1
376010	Jan Mayen	12971	Confirmed Eruption	Beerenberg (NE flank, Skrukkelia)	1			1973		1		15	45	Historical Observations								71.082	-8.155			1973		0	1976	1977	2	1
266030	Soputan	16427	Confirmed Eruption		2			1973		1		6		Historical Observations		1973		5		27		1.112	124.737			1973	1973	1	1976	1977	2	1
390020	Erebus	13162	Confirmed Eruption		2			1972		12	<	16	15	Historical Observations	>	2021		3		12		-77.53	167.17			1972	2021	50	1976	1977	2	1
241080	Tongariro	14602	Confirmed Eruption	Ngauruhoe	3			1972		11		22		Historical Observations		1974		8		19		-39.157	175.632			1972	1974	3	1976	1977	2	1
342080	Acatenango	10655	Confirmed Eruption	Pico Central-Yepocapa saddle	1			1972		11		12		Historical Observations		1972		12		16	15	14.501	-90.876			1972	1972	1	1976	1977	2	1
255060	Kavachi	15161	Confirmed Eruption		0			1972		10		24		Historical Observations								-8.991	157.979			1972		0	1975	1976	2	1
241100	Ruapehu	14639	Confirmed Eruption		1			1972		10		22		Historical Observations		1973		1		10		-39.28	175.57			1972	1973	2	1975	1976	2	1
264150	Paluweh	16268	Confirmed Eruption	Rokatenda	3			1972		10		22		Historical Observations		1973		1		16		-8.32	121.708			1972	1973	2	1975	1976	2	1
251070	Ritter Island	14973	Confirmed Eruption	West of Ritter Island	1			1972		10		9		Historical Observations		1972		10		9		-5.519	148.115			1972	1972	1	1975	1976	2	1
263250	Merapi	15916	Confirmed Eruption		2			1972		10		6		Historical Observations		1985		3		16	15	-7.54	110.446			1972	1985	14	1975	1976	2	1
284130	Fukutoku-Oka-no-Ba	17596	Uncertain Eruption		0			1972		10		1				1972		10		1		24.285	141.481			1972	1972	1	1974	1975	2	1
390030	Deception Island	13196	Uncertain Eruption					1972		9		29				1972		9		29		-63.001	-60.652			1972	1972	1	1974	1975	2	1
311320	Akutan	20022	Uncertain Eruption		2	?		1972		9	?	16	15									54.134	-165.986			1972		0	1974	1975	2	1
233010	Karthala	14202	Confirmed Eruption	North end of summit crater	1			1972		9		8		Historical Observations		1972		10		5		-11.75	43.38			1972	1972	1	1974	1975	2	1
282050	Kuchinoerabujima	16975	Confirmed Eruption	Shindake	2			1972		9		2		Historical Observations		1972		9		2		30.443	130.217			1972	1972	1	1974	1975	2	1
358020	Calbuco	12263	Confirmed Eruption		2			1972		8		26		Historical Observations		1972		8		26		-41.33	-72.618			1972	1972	1	1973	1974	2	1
352010	Reventador	11443	Confirmed Eruption		2			1972		7		16	15	Historical Observations		1972		9		16	15	-0.077	-77.656			1972	1972	1	1973	1974	2	1
360160	Kick 'em Jenny	12462	Confirmed Eruption		0			1972		7		5		Hydrophonic		1972		7		5		12.3	-61.64			1972	1972	1	1973	1974	2	1
333020	Rocard	10304	Confirmed Eruption		0			1972		7		4		Hydrophonic		1972		7		19		-17.662	-148.586			1972	1972	1	1973	1974	2	1
255020	Bagana	15138	Confirmed Eruption		2			1972		7		2	182	Historical Observations		1995		7	>	2	182	-6.137	155.196			1972	1995	24	1973	1974	2	1
358060	Lautaro	12320	Confirmed Eruption		1			1972		7		2	182	Historical Observations								-49.019	-73.504			1972		0	1973	1974	2	1
357070	Chillan, Nevados de	11990	Uncertain Eruption	Volcán Nuevo				1972		7		2	182									-36.868	-71.378			1972		0	1973	1974	2	1
357080	Antuco	19913	Discredited Eruption					1972		7		2	182									-37.406	-71.349			1972		0	1973	1974	2	1
355100	Lascar	11861	Uncertain Eruption		2	?		1972		7		2	182									-23.37	-67.73			1972		0	1973	1974	2	1
355090	Putana	11842	Uncertain Eruption					1972		7		2	182									-22.557	-67.853			1972		0	1973	1974	2	1
334070	Galapagos Rift	10347	Confirmed Eruption	Galápagos Rift (Clambake vent area)	0			1972		6		29	1	Historical Observations								0.792	-86.15			1972		0	1973	1974	2	1
290390	Alaid	18885	Confirmed Eruption	NW foot	3			1972		6		18		Historical Observations		1972		9		11		50.861	155.565			1972	1972	1	1973	1974	2	1
262000	Krakatau	15610	Confirmed Eruption	Anak Krakatau	2			1972		6		10	3	Historical Observations		1973		7		1	30	-6.102	105.423			1972	1973	2	1972	1973	2	1
233020	Fournaise, Piton de la	14363	Confirmed Eruption	South, ENE, north and SE of Dolomieu	2			1972		6	?	9		Historical Observations		1973		1	?	16		-21.244	55.708			1972	1973	2	1972	1973	2	1
353010	Fernandina	11667	Confirmed Eruption	SE caldera bench	0			1972		6		4	45	Historical Observations								-0.37	-91.55			1972		0	1972	1973	2	1
257060	Epi	13365	Uncertain Eruption		0			1972		5		15	5			1972		6		25	5	-16.68	168.37			1972	1972	1	1972	1973	2	1
290160	Unnamed	18786	Confirmed Eruption		0			1972		4		29		Hydrophonic		1972		4		30		46.47	151.28			1972	1972	1	1972	1973	2	1
257040	Ambrym	15276	Confirmed Eruption	Benbow, Marum	3			1972		4		15		Historical Observations		1972		8		15		-16.25	168.12			1972	1972	1	1971	1972	2	1
241080	Tongariro	14601	Confirmed Eruption	Ngauruhoe	2			1972		3		19		Historical Observations		1972		6		6		-39.157	175.632			1972	1972	1	1971	1972	2	1
300040	Zheltovsky	18920	Uncertain Eruption		1	?		1972		3		16	15									51.577	157.328			1972		0	1971	1972	2	1
373010	Grimsvotn	12837	Uncertain Eruption		0			1972		3		16	15			1972		4		16	15	64.416	-17.316			1972	1972	1	1971	1972	2	1
257070	Kuwae	15345	Uncertain Eruption	Karua	0			1972		3		5	5			1972		5		15	5	-16.829	168.536			1972	1972	1	1971	1972	2	1
345040	Poas	11173	Confirmed Eruption		2			1972		2		9		Historical Observations		1973		9		8		10.2	-84.233			1972	1973	2	1970	1971	2	1
263310	Tengger Caldera	16055	Confirmed Eruption	Bromo	2			1972		1		26		Historical Observations		1972		3		16	15	-7.942	112.95			1972	1972	1	1970	1971	2	1
264010	Batur	16200	Confirmed Eruption	Batur III	2			1972		1		19		Historical Observations		1972		3		16	15	-8.242	115.375			1972	1972	1	1970	1971	2	1
267020	Karangetang	16527	Confirmed Eruption		3			1972		1		16	15	Historical Observations		1976		4		5		2.781	125.407			1972	1976	5	1970	1971	2	1
250030	Central Bismarck Sea	14860	Confirmed Eruption		0			1972		1		8		Hydrophonic		1972		1		12		-3.03	147.78			1972	1972	1	1969	1970	2	1
390020	Erebus	13161	Confirmed Eruption		1			1972		1	?	3		Historical Observations								-77.53	167.17			1972		0	1969	1970	2	1
357110	Llaima	12064	Confirmed Eruption		2			1971		12		1	30	Historical Observations		1972		3		12		-38.692	-71.729			1971	1972	2	1969	1970	2	1
300260	Klyuchevskoy	19458	Confirmed Eruption		1			1971		11		16	15	Historical Observations		1973		12		16	15	56.056	160.642			1971	1973	3	1968	1969	2	1
263210	Sundoro	15804	Confirmed Eruption		2			1971		10		29		Historical Observations		1971		11		9		-7.3	109.992			1971	1971	1	1968	1969	2	1
357120	Villarrica	12165	Confirmed Eruption	Summit, NE and SW flanks	2			1971		10		29		Historical Observations		1972		2		21		-39.42	-71.93			1971	1972	2	1968	1969	2	1
257060	Epi	15329	Uncertain Eruption		0			1971		10		28				1971		11	?	15		-16.68	168.37			1971	1971	1	1968	1969	2	1
383010	La Palma	13058	Confirmed Eruption	Teneguia	2			1971		10		26		Historical Observations		1971		11		18		28.57	-17.83			1971	1971	1	1967	1968	2	1
313010	Augustine	20271	Confirmed Eruption		1			1971		10		7		Historical Observations		1971		10		8		59.363	-153.43			1971	1971	1	1967	1968	2	1
360150	Soufriere St. Vincent	12454	Confirmed Eruption		0			1971		10		4	6	Historical Observations		1972		3		20		13.33	-61.18			1971	1972	2	1967	1968	2	1
332010	Kilauea	10107	Confirmed Eruption	Halemaumau and upper SW rift zone	0			1971		9		24		Historical Observations		1971		9		29		19.421	-155.287			1971	1971	1	1967	1968	2	1
211060	Etna	13799	Confirmed Eruption	Central Crater	2			1971		9		19		Historical Observations		1979		3	?	16	15	37.748	14.999			1971	1979	9	1967	1968	2	1
332000	Loihi	20728	Uncertain Eruption		0			1971		9		17				1972		9		16	15	18.92	-155.27			1971	1972	2	2019	2021	3	1
342090	Fuego	10725	Confirmed Eruption		3			1971		9		14		Historical Observations		1971		9		15		14.473	-90.88			1971	1971	1	2019	2021	3	1
263340	Raung	16139	Confirmed Eruption		1			1971		9		14		Historical Observations		1971		9		14		-8.119	114.056			1971	1971	1	2018	2020	3	2
256010	Tinakula	15201	Confirmed Eruption	Upper and lower NW flanks	2			1971		9		6		Historical Observations		1971		12		11		-10.386	165.804			1971	1971	1	2018	2020	3	2
333020	Rocard	10256	Confirmed Eruption		0			1971		9		6		Hydrophonic								-17.662	-148.586			1971		0	2018	2020	3	2
332010	Kilauea	10106	Confirmed Eruption	Kilauea Caldera	0			1971		8		14		Historical Observations		1971		8		14		19.421	-155.287			1971	1971	1	2017	2019	3	2
358057	Hudson, Cerro	12298	Confirmed Eruption	NW part of caldera	3			1971		8		12		Historical Observations		1971		9	>	18		-45.9	-72.97			1971	1971	1	2015	2017	3	2
282090	Kirishimayama	17160	Confirmed Eruption	North foot, near Tearai hot springs	1			1971		8		5		Historical Observations		1971		8		5		31.934	130.862			1971	1971	1	2014	2016	3	2
241040	Whakaari/White Island	14485	Confirmed Eruption	South of Rudolf (1971 crater)	2			1971		7		19		Historical Observations		1971		7		20		-37.52	177.18			1971	1971	1	2014	2016	3	2
312110	Chiginagak	20198	Confirmed Eruption		2	?		1971		7		16	15	Historical Observations		1971		7		16	15	57.135	-156.99			1971	1971	1	2014	2016	3	2
290380	Ebeko	18873	Uncertain Eruption	Northern crater	1			1971		7		2	182									50.686	156.014			1971		0	2014	2016	3	2
300260	Klyuchevskoy	19457	Confirmed Eruption		1			1971		6		16	15	Historical Observations		1971		7		16	15	56.056	160.642			1971	1971	1	2013	2015	3	2
264110	Iya	16260	Uncertain Eruption		1			1971		6		16	15			1971		6		16	15	-8.891	121.641			1971	1971	1	2013	2015	3	2
261170	Kerinci	15520	Uncertain Eruption		1	?		1971		6		16	15			1971		6		16	15	-1.697	101.264			1971	1971	1	2012	2014	3	2
266030	Soputan	16426	Confirmed Eruption		1			1971		5		19		Historical Observations		1971		5		19		1.112	124.737			1971	1971	1	2010	2012	3	2
257020	Gaua	15224	Confirmed Eruption	Mt. Garat (upper SE flank)	2			1971		5		12		Historical Observations		1971		5		13		-14.27	167.5			1971	1971	1	2009	2011	3	2
266100	Lokon-Empung	16453	Confirmed Eruption	Tompaluan	2			1971		5		11		Historical Observations		1971		10		26	5	1.358	124.792			1971	1971	1	2008	2010	3	2
344020	San Cristobal	10880	Confirmed Eruption		1			1971		5		3		Historical Observations		1971		7		5	4	12.702	-87.004			1971	1971	1	2008	2010	3	2
241040	Whakaari/White Island	14484	Confirmed Eruption	Noisy Nellie Crater	2			1971		4		9	3	Historical Observations								-37.52	177.18			1971		0	2008	2010	3	2
211060	Etna	13798	Confirmed Eruption	SE flank (3050 m), E flank (2880-1800 m)	2			1971		4		5		Historical Observations		1971		6		12		37.748	14.999			1971	1971	1	2006	2008	3	2
284010	Izu-Oshima	18240	Confirmed Eruption	Mihara-yama	1			1971		4		5		Historical Observations		1971		4		5		34.724	139.394			1971	1971	1	2006	2008	3	2
241100	Ruapehu	14638	Confirmed Eruption		2			1971		4		3		Historical Observations		1971		11		1		-39.28	175.57			1971	1971	1	2005	2007	3	2
223020	Nyamulagira	14067	Confirmed Eruption	WNW flank (Rugarama)	3			1971		3		24		Historical Observations		1971		5		5	4	-1.408	29.2			1971	1971	1	2005	2007	3	2
284070	Myojinsho	18324	Uncertain Eruption		0			1971		3		18										31.888	139.918			1971		0	2004	2006	3	2
300250	Bezymianny	19349	Confirmed Eruption		3			1971		3		16	15	Historical Observations		1974		12	>	16	15	55.972	160.595			1971	1974	4	2002	2004	3	2
264010	Batur	16199	Confirmed Eruption		1			1971		3		11		Historical Observations		1971		8	>	25		-8.242	115.375			1971	1971	1	2002	2004	3	2
257070	Kuwae	15344	Confirmed Eruption	Karua	2			1971		2		22		Historical Observations		1971		2		22		-16.829	168.536			1971	1971	1	1998	2000	3	2
257040	Ambrym	15275	Confirmed Eruption	Marum, Benbow	2			1971		2		3		Historical Observations		1971		11		5		-16.25	168.12			1971	1971	1	1998	2000	3	2
344070	Negro, Cerro	10964	Confirmed Eruption	Summit and east flank	3			1971		2		3		Historical Observations		1971		2		14		12.506	-86.702			1971	1971	1	1997	1999	3	2
[truncated: 9,205 more rows]

## Sheet: Events
Global Volcanism Program - Volcanoes of the World 4.9.4				Downloaded on 13 May 2021 at 06:57 PM
Volcano Number	Volcano Name	Eruption Number	Eruption Start Year	Event Number	Event Type	Event Remarks	Event Date Year Modifier	Event Date Year	Event Date Year Uncertainty	Event Date Month	Event Date Day Modifier	Event Date Day	Event Date Day Uncertainty
344070	Negro, Cerro	10944	1850	136857	Explosion
344070	Negro, Cerro	10944	1850	136858	Scoria
344070	Negro, Cerro	10944	1850	136859	Lava flow(s)
344070	Negro, Cerro	10944	1850	136860	Property damage
344070	Negro, Cerro	10944	1850	136861	Lava fountains	Uncertain
344070	Negro, Cerro	10944	1850	136862	Earthquakes (undefined)	Before.
344070	Negro, Cerro	10944	1850	136863	Lightning
344070	Negro, Cerro	10944	1850	136864	Blocks
344070	Negro, Cerro	10945	1867	136866	Explosion
344070	Negro, Cerro	10945	1867	136867	Ash
344070	Negro, Cerro	10945	1867	136868	Lava flow(s)	Uncertain
344070	Negro, Cerro	10945	1867	136869	Cinder cone formation
344070	Negro, Cerro	10945	1867	136870	Crater formation	Parasitic.
344070	Negro, Cerro	10945	1867	136871	Blocks
344070	Negro, Cerro	10946	1899	136872	Explosion
344070	Negro, Cerro	10946	1899	136873	Ash
344070	Negro, Cerro	10946	1899	136874	Property damage
344070	Negro, Cerro	10947	1914	136876	Explosion
344070	Negro, Cerro	10947	1914	136877	Ash
344070	Negro, Cerro	10953	1949	136879	Explosion
344070	Negro, Cerro	10953	1949	136880	Ash
344070	Negro, Cerro	10954	1950	136882	Explosion
344070	Negro, Cerro	10954	1950	136883	Ash
344070	Negro, Cerro	10954	1950	136884	Lava flow(s)
344070	Negro, Cerro	10954	1950	136885	Lava fountains
344070	Negro, Cerro	10954	1950	136886	Flames
344070	Negro, Cerro	10954	1950	136887	Earthquakes (undefined)
344070	Negro, Cerro	10954	1950	136888	Blocks
344070	Negro, Cerro	10955	1954	136890	Explosion
344070	Negro, Cerro	10955	1954	136891	Ash
344070	Negro, Cerro	10956	1957	136894	Explosion
344070	Negro, Cerro	10956	1957	136895	Ash
344070	Negro, Cerro	10956	1957	136896	Lapilli
344070	Negro, Cerro	10956	1957	136897	Bombs
344070	Negro, Cerro	10956	1957	136898	Scoria
344070	Negro, Cerro	10956	1957	136899	Lava flow(s)
344070	Negro, Cerro	10956	1957	136900	Property damage
344070	Negro, Cerro	10957	1960	136903	Explosion
344070	Negro, Cerro	10957	1960	136904	Ash
344070	Negro, Cerro	10957	1960	136905	Lapilli
344070	Negro, Cerro	10957	1960	136906	Bombs
344070	Negro, Cerro	10957	1960	136907	Lava flow(s)
344070	Negro, Cerro	10957	1960	136908	Property damage
344070	Negro, Cerro	10958	1961	136910	Explosion
344070	Negro, Cerro	10964	1971	136911	Property damage
344070	Negro, Cerro	10964	1971	136912	Evacuations
344070	Negro, Cerro	10964	1971	136913	Lightning
344070	Negro, Cerro	10964	1971	136914	Blocks
344070	Negro, Cerro	10965	1992	136916	Explosion
344070	Negro, Cerro	10965	1992	136917	Ash
344070	Negro, Cerro	10965	1992	136918	Scoria
344070	Negro, Cerro	10965	1992	136919	Property damage
344070	Negro, Cerro	10965	1992	136920	Fatalities			1992		4
344070	Negro, Cerro	10965	1992	136921	Evacuations
344070	Negro, Cerro	10965	1992	136922	Eruption cloud
344070	Negro, Cerro	10965	1992	136923	Volcanic tremor
344070	Negro, Cerro	10965	1992	136924	Earthquakes (undefined)	Before.
344070	Negro, Cerro	10966	1995	136926	Explosion
344070	Negro, Cerro	10966	1995	136927	Ash
344070	Negro, Cerro	10966	1995	136928	Pyroclastic flow	weak or small
344070	Negro, Cerro	10966	1995	136929	Phreatic activity
344070	Negro, Cerro	10966	1995	136930	Lava flow(s)
344070	Negro, Cerro	10966	1995	136931	Lava dome formation
344070	Negro, Cerro	10966	1995	136932	Property damage
344070	Negro, Cerro	10966	1995	136933	Evacuations
344070	Negro, Cerro	10966	1995	136934	Lava fountains
344070	Negro, Cerro	10966	1995	136935	Volcanic tremor
344070	Negro, Cerro	10966	1995	136936	Earthquakes (undefined)	Before.
344070	Negro, Cerro	10966	1995	136937	Earthquakes (undefined)
344092	Nejapa-Miraflores	10967	-7300	136939	Explosion
344092	Nejapa-Miraflores	10967	-7300	136940	Tephra
344092	Nejapa-Miraflores	10967	-7300	136941	Phreatomagmatic eruption
344092	Nejapa-Miraflores	10968	-5350	136943	Explosion
344091	Apoyeque	10974	-4160	136944	Pumice
344091	Apoyeque	10975	-2550	136947	Explosion
344091	Apoyeque	10975	-2550	136948	Ash
344091	Apoyeque	10975	-2550	136949	Lapilli
344091	Apoyeque	10975	-2550	136950	Bombs
344091	Apoyeque	10975	-2550	136951	Tsunami
344091	Apoyeque	10975	-2550	136952	Pumice
344091	Apoyeque	10975	-2550	136953	Phreatomagmatic eruption
344091	Apoyeque	10976	-1050	136954	Explosion
344091	Apoyeque	10976	-1050	136955	Lapilli
344091	Apoyeque	10976	-1050	136956	Pumice
344091	Apoyeque	10977	-50	136958	Explosion
344091	Apoyeque	10977	-50	136959	Ash
344091	Apoyeque	10977	-50	136960	Lapilli
344091	Apoyeque	10977	-50	136961	Pyroclastic flow
344091	Apoyeque	10977	-50	136962	Phreatic activity
344091	Apoyeque	10977	-50	136963	Pumice
344091	Apoyeque	10977	-50	136964	Phreatomagmatic eruption
344092	Nejapa-Miraflores	10978	-7430	136966	Explosion
344092	Nejapa-Miraflores	10978	-7430	136967	Ash
344092	Nejapa-Miraflores	10978	-7430	136968	Lapilli
344092	Nejapa-Miraflores	10978	-7430	136969	Scoria
344092	Nejapa-Miraflores	10978	-7430	136970	Pyroclastic flow
344092	Nejapa-Miraflores	10978	-7430	136971	Blocks
344092	Nejapa-Miraflores	10979	-4390	136973	Explosion
344092	Nejapa-Miraflores	10979	-4390	136974	Scoria
344092	Nejapa-Miraflores	10980	-3050	136976	Explosion
344090	Momotombo	10988	1605	136977	Lahar or mudflow
344090	Momotombo	10988	1605	136978	Loud audible noises
344090	Momotombo	10988	1605	136979	Earthquakes (undefined)
344090	Momotombo	10989	1609	136980	Explosion	Uncertain
344090	Momotombo	10989	1609	136981	Property damage	Uncertain
344090	Momotombo	10989	1609	136982	Lahar or mudflow	Uncertain
344090	Momotombo	10990	1736	136984	Explosion
344090	Momotombo	10991	1764	136986	Explosion
344090	Momotombo	10992	1849	136988	Explosion
344090	Momotombo	10993	1852	136990	Explosion	Uncertain
344090	Momotombo	10994	1854	136992	Explosion
344090	Momotombo	10994	1854	136993	Ash
344090	Momotombo	10994	1854	136994	Earthquakes (undefined)	Before.
344090	Momotombo	10995	1858	136996	Explosion
344090	Momotombo	10996	1870	136998	Explosion
344090	Momotombo	10996	1870	136999	Ash
344090	Momotombo	10996	1870	137000	Scoria
344090	Momotombo	10996	1870	137001	Earthquakes (undefined)	Time and Type Unknown.
344090	Momotombo	10997	1878	137003	Explosion
344090	Momotombo	10997	1878	137004	Ash
344090	Momotombo	10997	1878	137005	Blocks
344090	Momotombo	10998	1882	137007	Explosion
344090	Momotombo	10998	1882	137008	Flames
344090	Momotombo	10998	1882	137009	Earthquakes (undefined)	Time and Type Unknown.
344100	Masaya	11005	-170	137010	Lapilli
344100	Masaya	11005	-170	137011	Scoria
344100	Masaya	11005	-170	137012	Pyroclastic flow
344100	Masaya	11005	-170	137013	Phreatomagmatic eruption
344100	Masaya	11006	150	137016	Explosion
344100	Masaya	11006	150	137017	Lapilli
344100	Masaya	11006	150	137018	Scoria
344100	Masaya	11007	1524	137020	Lava lake
344100	Masaya	11007	1524	137021	Lava fountains
344100	Masaya	11007	1524	137022	Earthquake (tectonic)
344100	Masaya	11008	1551	137024	Lava lake
344100	Masaya	11009	1570	137026	Lava lake
344100	Masaya	11010	1586	137028	Lava lake	Uncertain
344100	Masaya	11010	1586	137029	Volcanic smoke
344100	Masaya	11011	1613	137031	Lava lake	Uncertain
344100	Masaya	11011	1613	137032	Volcanic smoke
344100	Masaya	11012	1670	137034	Explosion
344100	Masaya	11012	1670	137035	Lava flow(s)
344100	Masaya	11012	1670	137036	Lava lake
344100	Masaya	11013	1772	137039	Explosion
344100	Masaya	11013	1772	137040	Bombs
344100	Masaya	11013	1772	137041	Lava flow(s)
344100	Masaya	11013	1772	137042	Property damage
344100	Masaya	11022	1906	137045	Explosion
344100	Masaya	11022	1906	137046	Ash	weak or small
344100	Masaya	11022	1906	137047	Property damage
344100	Masaya	11022	1906	137048	Earthquakes (undefined)	Before.
344100	Masaya	11022	1906	137049	Earthquakes (undefined)
344100	Masaya	11022	1906	137050	Fauna kill	Terrestrial.
344100	Masaya	11023	1913	137052	Explosion	Uncertain
344100	Masaya	11023	1913	137053	Lava lake
344100	Masaya	11023	1913	137054	Earthquakes (undefined)
344100	Masaya	11024	1918	137056	Explosion	weak or small
344100	Masaya	11024	1918	137057	Ash
344100	Masaya	11025	1919	137059	Explosion
344100	Masaya	11025	1919	137060	Property damage
344100	Masaya	11026	1925	137062	Explosion
344100	Masaya	11026	1925	137063	Flames
344100	Masaya	11026	1925	137064	Earthquakes (undefined)
344100	Masaya	11027	1946	137066	Explosion
344100	Masaya	11027	1946	137067	Ash
344100	Masaya	11027	1946	137068	Lava lake
344100	Masaya	11027	1946	137069	Flames
344100	Masaya	11027	1946	137070	Loud audible noises
344100	Masaya	11027	1946	137071	Earthquakes (undefined)
344100	Masaya	11028	1948	137073	Explosion
344100	Masaya	11028	1948	137074	Flames
344100	Masaya	11028	1948	137075	Loud audible noises
344100	Masaya	11035	1998	137077	Explosion
344100	Masaya	11035	1998	137078	Bombs
344100	Masaya	11036	1999	137080	Ash
344100	Masaya	11036	1999	137081	Phreatic activity
344100	Masaya	11036	1999	137082	Earthquakes (undefined)	Before.
344100	Masaya	11037	2001	137084	Explosion
344100	Masaya	11037	2001	137085	Ash
344100	Masaya	11037	2001	137086	Property damage
344100	Masaya	11037	2001	137087	Earthquakes (undefined)	Before.
344100	Masaya	11037	2001	137088	Earthquakes (undefined)
344100	Masaya	11037	2001	137089	Blocks
344100	Masaya	11038	2003	137091	Explosion
344100	Masaya	11038	2003	137092	Ash	weak or small
344100	Masaya	11038	2003	137093	Lava lake
344100	Masaya	11039	2004	137095	Explosion	Uncertain
344100	Masaya	11039	2004	137096	Ash	Uncertain
344100	Masaya	11040	2005	137098	Explosion
344100	Masaya	11040	2005	137099	Ash
344100	Masaya	11040	2005	137100	Lava lake	Uncertain
344100	Masaya	11040	2005	137101	Loud audible noises
344100	Masaya	11040	2005	137102	Earthquakes (undefined)	Before.
344100	Masaya	11040	2005	137103	Glow
344100	Masaya	11041	2006	137105	Explosion
344100	Masaya	11041	2006	137106	Ash
344100	Masaya	11041	2006	137107	Lava lake
344100	Masaya	11041	2006	137108	Volcanic tremor	Before eruption.
344120	Concepcion	11049	1891	137109	Ash
344120	Concepcion	11050	1902	137111	Explosion
344120	Concepcion	11050	1902	137112	Lava flow(s)
344120	Concepcion	11050	1902	137113	Property damage
344120	Concepcion	11051	1907	137116	Explosion
344120	Concepcion	11051	1907	137117	Ash
344120	Concepcion	11051	1907	137118	Lava flow(s)
344120	Concepcion	11052	1918	137120	Explosion
344120	Concepcion	11052	1918	137121	Ash
344120	Concepcion	11053	1921	137124	Explosion
344120	Concepcion	11053	1921	137125	Lava flow(s)
344120	Concepcion	11053	1921	137126	Property damage
344120	Concepcion	11053	1921	137127	Evacuations
344120	Concepcion	11053	1921	137128	Loud audible noises
344120	Concepcion	11053	1921	137129	Ash	Incandescent
344120	Concepcion	11054	1928	137131	Explosion
344120	Concepcion	11054	1928	137132	Ash
344120	Concepcion	11054	1928	137133	Evacuations
344120	Concepcion	11054	1928	137134	Loud audible noises
344120	Concepcion	11055	1929	137136	Explosion
344120	Concepcion	11055	1929	137137	Ash
344120	Concepcion	11056	1935	137139	Explosion
344120	Concepcion	11056	1935	137140	Ash
344120	Concepcion	11056	1935	137141	Property damage
332010	Kilauea	10109	1973	137142	Lava flow(s)
332010	Kilauea	10109	1973	137143	Lava lake	Small
332010	Kilauea	10109	1973	137144	Lava fountains
332010	Kilauea	10109	1973	137145	Volcanic tremor	Before eruption.
332010	Kilauea	10110	1974	137149	Lava flow(s)
332010	Kilauea	10110	1974	137150	Property damage
332010	Kilauea	10110	1974	137151	Lava fountains
332010	Kilauea	10110	1974	137152	Volcanic tremor	Before eruption.
332010	Kilauea	10110	1974	137153	Earthquakes (undefined)	Before.
332010	Kilauea	10110	1974	137154	Deformation (undefined)
332010	Kilauea	10111	1974	137157	Lava flow(s)	violent, strong, or large
332010	Kilauea	10111	1974	137158	Property damage
332010	Kilauea	10111	1974	137159	Lava fountains
332010	Kilauea	10111	1974	137160	Volcanic tremor	Before eruption.
332010	Kilauea	10111	1974	137161	Earthquakes (undefined)	Before.
332010	Kilauea	10111	1974	137162	Deformation (inflation)
332010	Kilauea	10111	1974	137163	Deformation (deflation)
332010	Kilauea	10112	1974	137165	Lava flow(s)
332010	Kilauea	10112	1974	137166	Lava fountains
332010	Kilauea	10112	1974	137167	Volcanic tremor
332010	Kilauea	10112	1974	137168	Earthquakes (undefined)	Before.
332010	Kilauea	10112	1974	137169	Earthquakes (undefined)
332010	Kilauea	10112	1974	137170	Earthquakes (undefined)	After.
332010	Kilauea	10112	1974	137171	Deformation (inflation)
332010	Kilauea	10112	1974	137172	Deformation (deflation)
332010	Kilauea	10113	1975	137175	Lava flow(s)	moderate
332010	Kilauea	10118	1982	137176	Volcanic tremor
332010	Kilauea	10118	1982	137177	Seismicity (volcanic)	Before eruption.
332010	Kilauea	10118	1982	137178	Seismicity (volcanic)	After eruption.
332010	Kilauea	10118	1982	137179	Deformation (inflation)
332010	Kilauea	10119	1983	137181	Explosion
332010	Kilauea	10119	1983	137182	Tephra
332010	Kilauea	10119	1983	137183	Scoria
332010	Kilauea	10119	1983	137184	Lava flow(s)
332010	Kilauea	10119	1983	137185	Lava lake
332010	Kilauea	10119	1983	137186	Property damage
332010	Kilauea	10119	1983	137187	Fatalities			1993		4		19
332010	Kilauea	10119	1983	137188	Evacuations			1985		1
332010	Kilauea	10119	1983	137189	Lava fountains
332010	Kilauea	10119	1983	137190	Volcanic tremor
332010	Kilauea	10119	1983	137191	Seismicity (volcanic)	Before eruption.
332010	Kilauea	10119	1983	137192	Deformation (inflation)
332010	Kilauea	10119	1983	137193	Deformation (deflation)
332010	Kilauea	10119	1983	137194	Lava flow(s)	Entered water.
332020	Mauna Loa	10120	-2150	137196	Lava flow(s)
332020	Mauna Loa	10121	-8050	137198	Lava flow(s)
332020	Mauna Loa	10122	-7850	137200	Lava flow(s)
332020	Mauna Loa	10123	-7550	137202	Lava flow(s)
332020	Mauna Loa	10124	-7350	137204	Lava flow(s)
332020	Mauna Loa	10125	-7150	137206	Lava flow(s)
332020	Mauna Loa	10126	-6650	137208	Lava flow(s)
332020	Mauna Loa	10144	-1700	137211	Lava flow(s)
332020	Mauna Loa	10145	-1650	137213	Lava flow(s)
332020	Mauna Loa	10146	-1300	137216	Lava flow(s)
332020	Mauna Loa	10147	-950	137218	Lava flow(s)
332020	Mauna Loa	10148	-600	137220	Lava flow(s)
332020	Mauna Loa	10149	-500	137222	Lava flow(s)
332020	Mauna Loa	10150	-400	137224	Lava flow(s)
332020	Mauna Loa	10151	-300	137226	Lava flow(s)
332020	Mauna Loa	10152	-200	137228	Lava flow(s)
332020	Mauna Loa	10153	-80	137230	Lava flow(s)
332020	Mauna Loa	10154	-60	137232	Lava flow(s)
332020	Mauna Loa	10155	-30	137234	Lava flow(s)
332020	Mauna Loa	10156	50	137236	Lava flow(s)
332020	Mauna Loa	10157	100	137238	Lava flow(s)
332020	Mauna Loa	10158	350	137240	Lava flow(s)
332020	Mauna Loa	10159	450	137242	Lava flow(s)
332020	Mauna Loa	10176	1390	137245	Lava flow(s)
332020	Mauna Loa	10177	1440	137247	Lava flow(s)
332020	Mauna Loa	10178	1470	137249	Lava flow(s)
332020	Mauna Loa	10179	1500	137251	Lava flow(s)
332020	Mauna Loa	10180	1510	137253	Lava flow(s)
332020	Mauna Loa	10181	1540	137255	Lava flow(s)
332020	Mauna Loa	10182	1640	137257	Lava flow(s)
332020	Mauna Loa	10183	1650	137259	Lava flow(s)
332020	Mauna Loa	10184	1680	137261	Lava flow(s)
332020	Mauna Loa	10185	1685	137263	Lava flow(s)
332020	Mauna Loa	10186	1730	137265	Lava flow(s)
332020	Mauna Loa	10187	1750	137267	Lava flow(s)
332020	Mauna Loa	10188	1832	137270	Lava flow(s)
332020	Mauna Loa	10189	1843	137273	Lava flow(s)
332020	Mauna Loa	10190	1849	137275	Lava flow(s)
332020	Mauna Loa	10197	1870	137278	Lava flow(s)	Uncertain
332020	Mauna Loa	10197	1870	137279	Volcanic smoke
332020	Mauna Loa	10198	1871	137281	Lava flow(s)
332020	Mauna Loa	10199	1872	137283	Lava flow(s)
332020	Mauna Loa	10199	1872	137284	Lava fountains
332020	Mauna Loa	10200	1873	137286	Lava flow(s)
332020	Mauna Loa	10201	1873	137288	Lava flow(s)
332020	Mauna Loa	10201	1873	137289	Lava fountains
332020	Mauna Loa	10202	1875	137291	Lava flow(s)
332020	Mauna Loa	10203	1875	137293	Lava flow(s)
332020	Mauna Loa	10204	1876	137295	Lava flow(s)
332020	Mauna Loa	10205	1877	137299	Lava flow(s)
332020	Mauna Loa	10206	1879	137301	Lava flow(s)
332020	Mauna Loa	10207	1880	137303	Lava flow(s)
332020	Mauna Loa	10207	1880	137304	Lava fountains
332020	Mauna Loa	10208	1880	137306	Ash
332020	Mauna Loa	10208	1880	137307	Lapilli
332020	Mauna Loa	10208	1880	137308	Lava flow(s)
332020	Mauna Loa	10208	1880	137309	Property damage
332020	Mauna Loa	10208	1880	137310	Evacuations
332020	Mauna Loa	10208	1880	137311	Lava fountains
344120	Concepcion	11064	1973	137313	Explosion	weak or small
344120	Concepcion	11064	1973	137314	Ash
344120	Concepcion	11065	1977	137316	Explosion	weak or small
344120	Concepcion	11065	1977	137317	Ash	weak or small
344120	Concepcion	11065	1977	137318	Earthquakes (undefined)
344120	Concepcion	11065	1977	137319	Ash	Incandescent
344120	Concepcion	11066	1978	137321	Explosion
344120	Concepcion	11066	1978	137322	Ash
344120	Concepcion	11066	1978	137323	Earthquakes (undefined)	Before.
344120	Concepcion	11067	1982	137325	Ash
344120	Concepcion	11067	1982	137326	Phreatic activity	weak or small
344120	Concepcion	11068	1983	137328	Explosion
344120	Concepcion	11068	1983	137329	Ash
344120	Concepcion	11068	1983	137330	Earthquakes (undefined)	Before.
344120	Concepcion	11068	1983	137331	Earthquakes (undefined)
344120	Concepcion	11069	1984	137333	Ash
344120	Concepcion	11069	1984	137334	Phreatic activity
344120	Concepcion	11069	1984	137335	Property damage
344120	Concepcion	11069	1984	137336	Earthquakes (undefined)
344120	Concepcion	11070	1985	137338	Explosion
344120	Concepcion	11070	1985	137339	Ash
344120	Concepcion	11070	1985	137340	Evacuations
344120	Concepcion	11071	1988	137342	Explosion
344120	Concepcion	11071	1988	137343	Ash
345060	Irazu	11079	1885	137346	Explosion
344120	Concepcion	11080	2009	137348	Explosion
344120	Concepcion	11080	2009	137349	Ash
345020	Rincon de la Vieja	11083	-1820	137356	Explosion
345020	Rincon de la Vieja	11083	-1820	137357	Ash
345020	Rincon de la Vieja	11083	-1820	137358	Bombs
345020	Rincon de la Vieja	11083	-1820	137359	Pyroclastic flow
345020	Rincon de la Vieja	11083	-1820	137360	Pumice
345020	Rincon de la Vieja	11084	430	137362	Explosion
345020	Rincon de la Vieja	11084	430	137363	Scoria
345020	Rincon de la Vieja	11084	430	137364	Pyroclastic flow
345020	Rincon de la Vieja	11085	1529	137365	Phreatic activity	Uncertain
345020	Rincon de la Vieja	11085	1529	137366	Fumarolic or solfataric	Uncertain
345020	Rincon de la Vieja	11085	1529	137367	Volcanic smoke
345020	Rincon de la Vieja	11086	1765	137369	Phreatic activity	Uncertain
345020	Rincon de la Vieja	11087	1844	137371	Explosion
345020	Rincon de la Vieja	11088	1849	137373	Explosion
345020	Rincon de la Vieja	11089	1851	137374	Phreatic activity	Uncertain
345020	Rincon de la Vieja	11089	1851	137375	Fumarolic or solfataric	Uncertain
345020	Rincon de la Vieja	11089	1851	137376	Volcanic smoke
345020	Rincon de la Vieja	11099	1983	137380	Explosion
345020	Rincon de la Vieja	11099	1983	137381	Ash
345020	Rincon de la Vieja	11099	1983	137382	Lapilli
345020	Rincon de la Vieja	11099	1983	137383	Bombs
345020	Rincon de la Vieja	11099	1983	137384	Phreatic activity
345020	Rincon de la Vieja	11099	1983	137385	Lahar or mudflow
345020	Rincon de la Vieja	11099	1983	137386	Phreatomagmatic eruption
345020	Rincon de la Vieja	11099	1983	137387	Fauna kill	Aquatic.
345020	Rincon de la Vieja	11100	1984	137390	Explosion
345020	Rincon de la Vieja	11100	1984	137391	Ash
345020	Rincon de la Vieja	11100	1984	137392	Phreatic activity
345020	Rincon de la Vieja	11100	1984	137393	Lahar or mudflow
345020	Rincon de la Vieja	11100	1984	137394	Phreatomagmatic eruption
345020	Rincon de la Vieja	11100	1984	137395	Blocks
345020	Rincon de la Vieja	11101	1985	137398	Ash
345020	Rincon de la Vieja	11101	1985	137399	Phreatic activity
345020	Rincon de la Vieja	11101	1985	137400	Volcanic tremor
345020	Rincon de la Vieja	11101	1985	137401	Earthquakes (undefined)
345020	Rincon de la Vieja	11101	1985	137402	Blocks
345020	Rincon de la Vieja	11102	1986	137405	Phreatic activity
345020	Rincon de la Vieja	11102	1986	137406	Blocks
345020	Rincon de la Vieja	11103	1987	137409	Phreatic activity
345020	Rincon de la Vieja	11103	1987	137410	Property damage
345033	Arenal	11108	-4450	137411	Tephra
345033	Arenal	11109	-3900	137413	Explosion
345033	Arenal	11109	-3900	137414	Tephra
345033	Arenal	11110	-3350	137416	Explosion
345033	Arenal	11110	-3350	137417	Tephra
345033	Arenal	11111	-3190	137419	Explosion
345033	Arenal	11111	-3190	137420	Pyroclastic flow
345033	Arenal	11112	-2800	137422	Explosion
345033	Arenal	11112	-2800	137423	Tephra
345033	Arenal	11113	-2250	137425	Explosion
345033	Arenal	11113	-2250	137426	Tephra
345033	Arenal	11114	-1770	137428	Explosion
345033	Arenal	11114	-1770	137429	Pyroclastic flow
345033	Arenal	11115	-1650	137431	Explosion
345033	Arenal	11115	-1650	137432	Ash
345033	Arenal	11115	-1650	137433	Scoria
345033	Arenal	11116	-1450	137435	Explosion
345033	Arenal	11116	-1450	137436	Ash
345033	Arenal	11116	-1450	137437	Scoria
345033	Arenal	11117	-1250	137439	Explosion
345033	Arenal	11117	-1250	137440	Ash
345033	Arenal	11117	-1250	137441	Lapilli
345033	Arenal	11117	-1250	137442	Pyroclastic flow
345033	Arenal	11125	700	137444	Scoria
345033	Arenal	11126	750	137446	Explosion
345033	Arenal	11126	750	137447	Ash
345033	Arenal	11126	750	137448	Pyroclastic flow
345033	Arenal	11127	1020	137450	Explosion
345033	Arenal	11127	1020	137451	Ash
345033	Arenal	11127	1020	137452	Pyroclastic flow
345033	Arenal	11128	1030	137454	Explosion
345033	Arenal	11128	1030	137455	Ash
345033	Arenal	11128	1030	137456	Lapilli
345033	Arenal	11128	1030	137457	Scoria
345033	Arenal	11128	1030	137458	Pyroclastic flow
345033	Arenal	11129	1400	137460	Explosion
345033	Arenal	11129	1400	137461	Ash
345033	Arenal	11129	1400	137462	Pyroclastic flow
345033	Arenal	11129	1400	137463	Pumice
345033	Arenal	11130	1440	137465	Explosion
345033	Arenal	11130	1440	137466	Ash
345033	Arenal	11130	1440	137467	Pyroclastic flow
345033	Arenal	11130	1440	137468	Lava flow(s)
345033	Arenal	11131	1750	137471	Lava flow(s)
345033	Arenal	11132	1915	137472	Explosion	Uncertain
345033	Arenal	11133	1922	137474	Explosion
345033	Arenal	11133	1922	137475	Ash
345033	Arenal	11133	1922	137476	Lahar or mudflow
345040	Poas	11139	-5590	137477	Ash
345040	Poas	11139	-5590	137478	Bombs
345040	Poas	11139	-5590	137479	Blocks
345040	Poas	11140	-3950	137481	Explosion
345040	Poas	11140	-3950	137482	Pyroclastic flow
345040	Poas	11140	-3950	137483	Pumice
345040	Poas	11141	-760	137485	Explosion
345040	Poas	11141	-760	137486	Pyroclastic flow
345040	Poas	11141	-760	137487	Crater formation	Parasitic.
345040	Poas	11142	210	137489	Explosion
345040	Poas	11142	210	137490	Tephra
345040	Poas	11143	1280	137492	Explosion
345040	Poas	11143	1280	137493	Ash
345040	Poas	11144	1747	137495	Explosion	Uncertain
345040	Poas	11145	1828	137498	Ash
345040	Poas	11145	1828	137499	Phreatic activity
345040	Poas	11145	1828	137500	Blocks
345040	Poas	11146	1834	137503	Explosion
345040	Poas	11146	1834	137504	Ash
345040	Poas	11146	1834	137505	Phreatic activity
345040	Poas	11146	1834	137506	Property damage
345040	Poas	11146	1834	137507	Earthquakes (undefined)
345040	Poas	11147	1838	137508	Explosion	Uncertain
345040	Poas	11157	1914	137510	Ash
345040	Poas	11157	1914	137511	Phreatic activity
345040	Poas	11158	1916	137514	Explosion
345040	Poas	11158	1916	137515	Phreatic activity
345040	Poas	11159	1925	137518	Phreatic activity	weak or small
345040	Poas	11160	1929	137521	Phreatic activity	weak or small
345040	Poas	11161	1932	137524	Phreatic activity
345040	Poas	11162	1941	137527	Phreatic activity	weak or small
345040	Poas	11163	1946	137530	Phreatic activity
345040	Poas	11164	1948	137533	Phreatic activity	weak or small
345040	Poas	11165	1952	137536	Explosion
345040	Poas	11165	1952	137537	Ash
345040	Poas	11165	1952	137538	Lapilli
345040	Poas	11165	1952	137539	Bombs
345040	Poas	11165	1952	137540	Scoria
345040	Poas	11165	1952	137541	Pyroclastic flow
345040	Poas	11165	1952	137542	Phreatic activity
345040	Poas	11171	1969	137543	Earthquakes (undefined)
345040	Poas	11172	1970	137546	Phreatic activity
345040	Poas	11173	1972	137549	Explosion
345040	Poas	11173	1972	137550	Ash
345040	Poas	11173	1972	137551	Phreatic activity
345040	Poas	11173	1972	137552	Eruption cloud
345040	Poas	11173	1972	137553	Earthquake (tectonic)	After eruption.
345040	Poas	11173	1972	137554	Phreatomagmatic eruption
345040	Poas	11173	1972	137555	Blocks
345040	Poas	11174	1974	137558	Phreatic activity
345040	Poas	11175	1976	137561	Explosion
345040	Poas	11175	1976	137562	Phreatic activity
345040	Poas	11175	1976	137563	Eruption cloud
345040	Poas	11176	1977	137566	Ash
345040	Poas	11176	1977	137567	Phreatic activity	weak or small
345040	Poas	11177	1977	137570	Explosion	moderate
345040	Poas	11177	1977	137571	Ash
345040	Poas	11177	1977	137572	Phreatic activity
345040	Poas	11178	1978	137575	Ash
345040	Poas	11184	1991	137576	Earthquakes (undefined)
345040	Poas	11185	1992	137579	Phreatic activity
345040	Poas	11185	1992	137580	Property damage
345040	Poas	11185	1992	137581	Earthquakes (undefined)
345040	Poas	11186	1992	137584	Phreatic activity	weak or small
345040	Poas	11187	1994	137587	Ash
345040	Poas	11187	1994	137588	Phreatic activity
345040	Poas	11187	1994	137589	Property damage
345040	Poas	11187	1994	137590	Earthquakes (undefined)	Before.
345040	Poas	11187	1994	137591	Earthquakes (undefined)
345040	Poas	11188	1996	137594	Ash
345040	Poas	11188	1996	137595	Phreatic activity
345040	Poas	11188	1996	137596	Earthquakes (undefined)	Before.
345040	Poas	11188	1996	137597	Earthquakes (undefined)
345040	Poas	11188	1996	137598	Earthquakes (undefined)	After.
345040	Poas	11188	1996	137599	Blocks
345040	Poas	11189	2006	137602	Phreatic activity
345040	Poas	11189	2006	137603	Blocks
345040	Poas	11190	2006	137606	Ash
345040	Poas	11190	2006	137607	Phreatic activity
345040	Poas	11190	2006	137608	Blocks
345060	Irazu	11201	1723	137609	Seismicity (volcanic)
345060	Irazu	11201	1723	137610	Blocks
345060	Irazu	11202	1726	137612	Explosion
345060	Irazu	11202	1726	137613	Scoria
345060	Irazu	11202	1726	137614	Seismicity (volcanic)
345060	Irazu	11203	1775	137616	Explosion
345060	Irazu	11203	1775	137617	Ash
345060	Irazu	11203	1775	137618	Flames
345060	Irazu	11203	1775	137619	Earthquakes (undefined)
345060	Irazu	11204	1821	137621	Explosion	Uncertain
345060	Irazu	11205	1822	137623	Explosion
345060	Irazu	11205	1822	137624	Earthquakes (undefined)
345060	Irazu	11206	1823	137626	Explosion
345060	Irazu	11206	1823	137627	Earthquakes (undefined)	Before.
345060	Irazu	11207	1826	137629	Explosion	Uncertain
345060	Irazu	11207	1826	137630	Ash	Uncertain
345060	Irazu	11208	1842	137632	Explosion
345060	Irazu	11208	1842	137633	Ash
345060	Irazu	11209	1844	137635	Explosion
345060	Irazu	11210	1847	137637	Explosion
345060	Irazu	11210	1847	137638	Ash
345060	Irazu	11210	1847	137639	Scoria
345060	Irazu	11210	1847	137640	Seismicity (volcanic)
345060	Irazu	11223	1928	137642	Explosion
345060	Irazu	11223	1928	137643	Ash
345060	Irazu	11224	1930	137645	Explosion
345060	Irazu	11224	1930	137646	Ash
345060	Irazu	11225	1933	137648	Explosion
345060	Irazu	11225	1933	137649	Ash
345060	Irazu	11225	1933	137650	Property damage
345060	Irazu	11225	1933	137651	Earthquakes (undefined)	Before.
345060	Irazu	11225	1933	137652	Earthquakes (undefined)
345060	Irazu	11226	1939	137654	Explosion
345060	Irazu	11226	1939	137655	Ash
345060	Irazu	11226	1939	137656	Property damage
345060	Irazu	11226	1939	137657	Earthquakes (undefined)
345060	Irazu	11227	1962	137659	Fumarolic or solfataric
345060	Irazu	11228	1963	137661	Explosion
345060	Irazu	11228	1963	137662	Ash
345060	Irazu	11228	1963	137663	Lapilli
345060	Irazu	11228	1963	137664	Bombs
345060	Irazu	11228	1963	137665	Pyroclastic flow
345060	Irazu	11228	1963	137666	Phreatic activity
345060	Irazu	11228	1963	137667	Lava dome formation
345060	Irazu	11228	1963	137668	Property damage
345060	Irazu	11228	1963	137669	Fatalities			1963		3		17
345060	Irazu	11228	1963	137670	Lahar or mudflow
345060	Irazu	11228	1963	137671	Evacuations
345060	Irazu	11228	1963	137672	Loud audible noises
345060	Irazu	11228	1963	137673	Seismicity (volcanic)
345060	Irazu	11228	1963	137674	Lightning
345070	Turrialba	11236	-830	137675	Pyroclastic flow
345070	Turrialba	11237	40	137677	Explosion
345070	Turrialba	11237	40	137678	Ash
345070	Turrialba	11237	40	137679	Lapilli
345070	Turrialba	11237	40	137680	Pyroclastic flow
345070	Turrialba	11237	40	137681	Lava flow(s)	Uncertain
345070	Turrialba	11237	40	137682	Lava dome formation	Uncertain
345070	Turrialba	11237	40	137683	Pumice
345070	Turrialba	11238	640	137685	Explosion
345070	Turrialba	11238	640	137686	Pyroclastic flow
345070	Turrialba	11238	640	137687	Phreatic activity
345070	Turrialba	11239	1350	137689	Explosion
345070	Turrialba	11240	1723	137691	Explosion	Uncertain
345070	Turrialba	11240	1723	137692	Volcanic smoke
345070	Turrialba	11241	1847	137694	Volcanic smoke
345070	Turrialba	11242	1853	137696	Explosion
345070	Turrialba	11242	1853	137697	Tephra
345070	Turrialba	11243	1855	137699	Explosion
345070	Turrialba	11243	1855	137700	Flames
345070	Turrialba	11244	1861	137702	Volcanic smoke
345070	Turrialba	11245	1864	137704	Ash
345070	Turrialba	11245	1864	137705	Pyroclastic flow
345070	Turrialba	11245	1864	137706	Phreatic activity
345070	Turrialba	11245	1864	137707	Earthquakes (undefined)
346010	Baru	11253	710	137708	Property damage
346010	Baru	11253	710	137709	Evacuations
346010	Baru	11253	710	137710	Pumice
346010	Baru	11254	1130	137712	Explosion
346010	Baru	11254	1130	137713	Ash
346010	Baru	11254	1130	137714	Lapilli
346010	Baru	11254	1130	137715	Pyroclastic flow
346010	Baru	11255	1340	137717	Explosion
346010	Baru	11255	1340	137718	Ash
346010	Baru	11255	1340	137719	Pyroclastic flow
346010	Baru	11256	1550	137721	Explosion
346010	Baru	11256	1550	137722	Ash
346010	Baru	11256	1550	137723	Pyroclastic flow
346010	Baru	11256	1550	137724	Property damage
346010	Baru	11256	1550	137725	Evacuations
351011	Romeral	11257	-6510	137726	Explosion
351011	Romeral	11257	-6510	137727	Pumice
351012	Bravo, Cerro	11258	-4280	137729	Explosion
351012	Bravo, Cerro	11258	-4280	137730	Ash
351012	Bravo, Cerro	11258	-4280	137731	Pumice
351012	Bravo, Cerro	11259	-1310	137733	Explosion
351012	Bravo, Cerro	11259	-1310	137734	Ash
351012	Bravo, Cerro	11259	-1310	137735	Pumice
351012	Bravo, Cerro	11260	-1050	137737	Explosion
351012	Bravo, Cerro	11260	-1050	137738	Ash
351012	Bravo, Cerro	11260	-1050	137739	Pumice
351020	Ruiz, Nevado del	11271	-1245	137742	Explosion
351020	Ruiz, Nevado del	11271	-1245	137743	Ash
351020	Ruiz, Nevado del	11271	-1245	137744	Pyroclastic flow
351020	Ruiz, Nevado del	11271	-1245	137745	Phreatic activity
351020	Ruiz, Nevado del	11271	-1245	137746	Lava dome formation	Uncertain
351020	Ruiz, Nevado del	11271	-1245	137747	Lahar or mudflow
351020	Ruiz, Nevado del	11271	-1245	137748	Edifice destroyed	Collapse/avalanche
351020	Ruiz, Nevado del	11271	-1245	137749	Debris avalanches
351020	Ruiz, Nevado del	11271	-1245	137750	Pumice
351020	Ruiz, Nevado del	11272	-850	137752	Explosion
351020	Ruiz, Nevado del	11272	-850	137753	Lapilli
351020	Ruiz, Nevado del	11272	-850	137754	Pyroclastic flow
351020	Ruiz, Nevado del	11272	-850	137755	Lahar or mudflow
351020	Ruiz, Nevado del	11272	-850	137756	Pumice
351020	Ruiz, Nevado del	11273	-200	137758	Explosion
351020	Ruiz, Nevado del	11273	-200	137759	Pumice
351020	Ruiz, Nevado del	11274	350	137761	Explosion
351020	Ruiz, Nevado del	11274	350	137762	Tephra
351020	Ruiz, Nevado del	11275	675	137764	Explosion
351020	Ruiz, Nevado del	11275	675	137765	Pyroclastic flow
351020	Ruiz, Nevado del	11275	675	137766	Lahar or mudflow
351020	Ruiz, Nevado del	11275	675	137767	Pumice
351020	Ruiz, Nevado del	11276	1350	137769	Explosion
351020	Ruiz, Nevado del	11276	1350	137770	Lahar or mudflow
351020	Ruiz, Nevado del	11276	1350	137771	Pumice
351020	Ruiz, Nevado del	11277	1541	137772	Phreatic activity	Uncertain
351020	Ruiz, Nevado del	11285	1831	137774	Phreatic activity	Uncertain
351020	Ruiz, Nevado del	11286	1833	137777	Phreatic activity	Uncertain
351020	Ruiz, Nevado del	11286	1833	137778	Fumarolic or solfataric	Uncertain
351020	Ruiz, Nevado del	11287	1845	137783	Explosion
351020	Ruiz, Nevado del	11287	1845	137784	Pyroclastic flow
351020	Ruiz, Nevado del	11287	1845	137785	Phreatic activity
351020	Ruiz, Nevado del	11287	1845	137786	Lava flow(s)	Uncertain
351020	Ruiz, Nevado del	11287	1845	137787	Property damage
351020	Ruiz, Nevado del	11287	1845	137788	Fatalities			1845		2		19
351020	Ruiz, Nevado del	11287	1845	137789	Lahar or mudflow
351020	Ruiz, Nevado del	11287	1845	137790	Debris avalanches
351020	Ruiz, Nevado del	11287	1845	137791	Earthquakes (undefined)
351020	Ruiz, Nevado del	11288	1916	137792	Ash
351020	Ruiz, Nevado del	11288	1916	137793	Phreatic activity
351020	Ruiz, Nevado del	11289	1984	137795	Ash
351020	Ruiz, Nevado del	11289	1984	137796	Phreatic activity	weak or small
351020	Ruiz, Nevado del	11289	1984	137797	Crater formation	Summit.
351020	Ruiz, Nevado del	11289	1984	137798	Volcanic tremor
351020	Ruiz, Nevado del	11290	1985	137800	Explosion
351020	Ruiz, Nevado del	11290	1985	137801	Ash
351020	Ruiz, Nevado del	11290	1985	137802	Pyroclastic flow
351020	Ruiz, Nevado del	11290	1985	137803	Phreatic activity
351020	Ruiz, Nevado del	11290	1985	137804	Property damage
351020	Ruiz, Nevado del	11290	1985	137805	Fatalities			1985		11		13
351020	Ruiz, Nevado del	11290	1985	137806	Lahar or mudflow
351030	Tolima, Nevado del	11299	260	137807	Explosion
351030	Tolima, Nevado del	11299	260	137808	Ash
351030	Tolima, Nevado del	11299	260	137809	Lapilli
351030	Tolima, Nevado del	11300	1822	137810	Explosion
351030	Tolima, Nevado del	11301	1825	137811	Explosion
351030	Tolima, Nevado del	11302	1826	137812	Explosion
351030	Tolima, Nevado del	11303	1943	137813	Explosion
351040	Machin	11304	-3800	137814	Explosion
351040	Machin	11304	-3800	137815	Pyroclastic flow
351040	Machin	11304	-3800	137816	Pumice
351040	Machin	11305	-2650	137817	Explosion
351040	Machin	11306	-2240	137818	Explosion
351040	Machin	11306	-2240	137819	Pyroclastic flow
351040	Machin	11306	-2240	137820	Pumice
351040	Machin	11307	-2100	137821	Explosion
351040	Machin	11307	-2100	137822	Pyroclastic flow
351040	Machin	11307	-2100	137823	Pumice
351040	Machin	11308	-650	137824	Explosion
351040	Machin	11308	-650	137825	Pyroclastic flow
351040	Machin	11308	-650	137826	Lahar or mudflow
351040	Machin	11309	750	137827	Explosion
351040	Machin	11310	1180	137829	Explosion
351040	Machin	11310	1180	137830	Pumice
351050	Huila, Nevado del	11311	1555	137831	Explosion
351050	Huila, Nevado del	11312	2007	137834	Explosion
351050	Huila, Nevado del	11312	2007	137835	Ash
351050	Huila, Nevado del	11312	2007	137836	Property damage
351050	Huila, Nevado del	11312	2007	137837	Lahar or mudflow
351050	Huila, Nevado del	11312	2007	137838	Evacuations			2007		4		18
351050	Huila, Nevado del	11312	2007	137839	Volcanic tremor
351060	Purace	11320	1847	137841	Explosion
351060	Purace	11320	1847	137842	Property damage
351060	Purace	11320	1847	137843	Evacuations
351060	Purace	11320	1847	137844	Eruption cloud
351060	Purace	11321	1860	137846	Explosion
351060	Purace	11322	1869	137848	Explosion
351060	Purace	11322	1869	137849	Ash
351060	Purace	11322	1869	137850	Pyroclastic flow
351060	Purace	11322	1869	137851	Lahar or mudflow
351060	Purace	11322	1869	137852	Earthquakes (undefined)
351060	Purace	11322	1869	137853	Lightning
351060	Purace	11323	1870	137855	Explosion
351060	Purace	11324	1878	137857	Explosion
351060	Purace	11325	1881	137859	Explosion
351060	Purace	11326	1885	137861	Explosion	violent, strong, or large
351060	Purace	11326	1885	137862	Property damage
351060	Purace	11326	1885	137863	Fatalities			1885		5		25
351060	Purace	11326	1885	137864	Earthquakes (undefined)
351060	Purace	11327	1899	137866	Explosion
351060	Purace	11328	1902	137868	Explosion
351060	Purace	11329	1906	137870	Explosion
351060	Purace	11330	1924	137872	Explosion
351070	Dona Juana	11341	1897	137873	Explosion
351070	Dona Juana	11341	1897	137874	Pyroclastic flow
351070	Dona Juana	11341	1897	137875	Lava dome formation
351070	Dona Juana	11341	1897	137876	Fatalities			1899		11		13
351070	Dona Juana	11341	1897	137877	Lahar or mudflow
351080	Galeras	11342	-7050	137879	Explosion
351080	Galeras	11342	-7050	137880	Pyroclastic flow
351080	Galeras	11343	-3150	137882	Explosion
351080	Galeras	11343	-3150	137883	Ash
351080	Galeras	11343	-3150	137884	Pyroclastic flow
351080	Galeras	11343	-3150	137885	Lahar or mudflow
351080	Galeras	11343	-3150	137886	Pumice
351080	Galeras	11344	-2580	137888	Explosion
351080	Galeras	11344	-2580	137889	Ash
351080	Galeras	11344	-2580	137890	Pyroclastic flow
351080	Galeras	11344	-2580	137891	Pumice
351080	Galeras	11345	-1160	137893	Explosion
351080	Galeras	11345	-1160	137894	Pyroclastic flow
351080	Galeras	11345	-1160	137895	Pumice
351080	Galeras	11346	-490	137897	Explosion
351080	Galeras	11346	-490	137898	Pyroclastic flow
351080	Galeras	11346	-490	137899	Lahar or mudflow
351080	Galeras	11346	-490	137900	Pumice
351080	Galeras	11347	890	137902	Explosion
351080	Galeras	11347	890	137903	Ash
351080	Galeras	11347	890	137904	Pyroclastic flow
351080	Galeras	11347	890	137905	Lahar or mudflow
351080	Galeras	11357	1834	137906	Explosion
351080	Galeras	11357	1834	137907	Lava flow(s)
351080	Galeras	11358	1836	137909	Explosion
351080	Galeras	11359	1865	137911	Explosion
351080	Galeras	11359	1865	137912	Ash
351080	Galeras	11359	1865	137913	Pyroclastic flow
351080	Galeras	11359	1865	137914	Lava flow(s)
351080	Galeras	11359	1865	137915	Lava dome formation
351080	Galeras	11359	1865	137916	Lahar or mudflow
351080	Galeras	11359	1865	137917	Pumice
351080	Galeras	11360	1889	137919	Explosion
351080	Galeras	11360	1889	137920	Lava flow(s)	Uncertain
351080	Galeras	11361	1891	137922	Explosion
351080	Galeras	11361	1891	137923	Lava flow(s)	Uncertain
351080	Galeras	11362	1923	137925	Explosion
351080	Galeras	11363	1924	137927	Explosion
351080	Galeras	11363	1924	137928	Lava flow(s)	Uncertain
351080	Galeras	11363	1924	137929	Lava dome formation
351080	Galeras	11363	1924	137930	Debris avalanches
351080	Galeras	11363	1924	137931	Lava fountains
351080	Galeras	11364	1930	137933	Explosion	Uncertain
351080	Galeras	11365	1932	137935	Explosion
351080	Galeras	11366	1933	137937	Explosion	Uncertain
351080	Galeras	11373	1990	137939	Earthquakes (undefined)	Before.
351080	Galeras	11373	1990	137940	Deformation (inflation)
351080	Galeras	11373	1990	137941	Blocks
351080	Galeras	11374	1993	137944	Explosion
351080	Galeras	11374	1993	137945	Ash
351080	Galeras	11374	1993	137946	Lapilli
351080	Galeras	11374	1993	137947	Property damage
351080	Galeras	11374	1993	137948	Fatalities			1993		1		14
351080	Galeras	11374	1993	137949	Earthquakes (undefined)	Before.
351080	Galeras	11374	1993	137950	Earthquakes (undefined)
351080	Galeras	11374	1993	137951	Earthquakes (undefined)	After.
351080	Galeras	11374	1993	137952	Lightning
351080	Galeras	11374	1993	137953	Blocks
351080	Galeras	11375	2000	137955	Phreatic activity	Uncertain
351080	Galeras	11375	2000	137956	Volcanic tremor
351080	Galeras	11375	2000	137957	Earthquakes (undefined)	Before.
351080	Galeras	11375	2000	137958	Earthquakes (undefined)
351080	Galeras	11376	2002	137960	Ash
351080	Galeras	11376	2002	137961	Lapilli
351080	Galeras	11376	2002	137962	Phreatic activity
351080	Galeras	11376	2002	137963	Volcanic tremor
351080	Galeras	11377	2004	137965	Explosion
351080	Galeras	11377	2004	137966	Ash
351080	Galeras	11377	2004	137967	Property damage
351080	Galeras	11377	2004	137968	Evacuations
351080	Galeras	11377	2004	137969	Volcanic tremor
351080	Galeras	11377	2004	137970	Blocks
351080	Galeras	11377	2004	137971	Fauna kill	Aquatic.
351090	Azufral	11384	-1650	137972	Pyroclastic flow
351090	Azufral	11384	-1650	137973	Lava dome formation
351090	Azufral	11385	-930	137975	Explosion
351090	Azufral	11385	-930	137976	Lapilli
351090	Azufral	11385	-930	137977	Pumice
351100	Cumbal	11386	1877	137979	Explosion
351100	Cumbal	11387	1926	137981	Explosion
351110	Chiles-Cerro Negro	11388	1936	137983	Explosion	Uncertain
352001	Soche	11389	-6650	137985	Explosion
352001	Soche	11389	-6650	137986	Pyroclastic flow
352001	Soche	11389	-6650	137987	Lava dome formation
352001	Soche	11389	-6650	137988	Pumice
352002	Chachimbiro	11390	-3740	137990	Explosion
352002	Chachimbiro	11390	-3740	137991	Ash
352002	Chachimbiro	11390	-3740	137992	Lava dome formation
352003	Cuicocha	11391	-2550	137994	Explosion
352003	Cuicocha	11391	-2550	137995	Lahar or mudflow
352003	Cuicocha	11392	-1150	137997	Explosion
352003	Cuicocha	11392	-1150	137998	Pyroclastic flow
352003	Cuicocha	11392	-1150	137999	Phreatic activity
352003	Cuicocha	11392	-1150	138000	Property damage
352003	Cuicocha	11392	-1150	138001	Caldera formation	Explosion
352003	Cuicocha	11392	-1150	138002	Pumice
352003	Cuicocha	11393	-950	138004	Explosion
352006	Cayambe	11408	260	138005	Explosion
352006	Cayambe	11408	260	138006	Ash
352006	Cayambe	11408	260	138007	Lapilli
352006	Cayambe	11409	880	138008	Explosion
352006	Cayambe	11409	880	138009	Ash
352006	Cayambe	11410	1040	138011	Explosion
352006	Cayambe	11410	1040	138012	Ash
352006	Cayambe	11410	1040	138013	Lapilli
352006	Cayambe	11410	1040	138014	Pyroclastic flow
352006	Cayambe	11410	1040	138015	Lava dome formation
352006	Cayambe	11411	1270	138016	Explosion
352006	Cayambe	11411	1270	138017	Ash
352006	Cayambe	11412	1290	138019	Explosion
352006	Cayambe	11412	1290	138020	Ash
352006	Cayambe	11412	1290	138021	Pyroclastic flow
352006	Cayambe	11412	1290	138022	Lava dome formation
352006	Cayambe	11412	1290	138023	Lahar or mudflow
352006	Cayambe	11412	1290	138024	Blocks
352006	Cayambe	11413	1440	138025	Explosion
352006	Cayambe	11413	1440	138026	Ash
352006	Cayambe	11414	1570	138028	Explosion
352006	Cayambe	11414	1570	138029	Ash
352006	Cayambe	11414	1570	138030	Bombs
352006	Cayambe	11414	1570	138031	Pyroclastic flow
352006	Cayambe	11414	1570	138032	Lava dome formation
352006	Cayambe	11414	1570	138033	Blocks
352006	Cayambe	11415	1590	138035	Explosion
352006	Cayambe	11415	1590	138036	Ash
352006	Cayambe	11415	1590	138037	Lapilli
352010	Reventador	11422	1541	138038	Explosion
352010	Reventador	11422	1541	138039	Earthquakes (undefined)
352010	Reventador	11423	1590	138041	Explosion
352010	Reventador	11423	1590	138042	Ash
352010	Reventador	11424	1691	138044	Explosion
352010	Reventador	11424	1691	138045	Ash
352030	Antisana	11425	1748	138047	Explosion
352010	Reventador	11426	1797	138049	Explosion
352010	Reventador	11426	1797	138050	Ash
352030	Antisana	11427	1801	138052	Explosion
352010	Reventador	11428	1843	138054	Explosion
352010	Reventador	11429	1843	138056	Explosion
352010	Reventador	11429	1843	138057	Ash
352010	Reventador	11430	1844	138059	Explosion
352010	Reventador	11430	1844	138060	Ash
352010	Reventador	11431	1856	138062	Explosion
352010	Reventador	11431	1856	138063	Ash
352010	Reventador	11431	1856	138064	Loud audible noises
352010	Reventador	11432	1871	138066	Explosion
352010	Reventador	11432	1871	138067	Loud audible noises
352010	Reventador	11433	1894	138069	Explosion
352010	Reventador	11443	1972	138071	Ash	Incandescent
352010	Reventador	11443	1972	138072	Blocks
352010	Reventador	11444	1973	138074	Explosion
352010	Reventador	11444	1973	138075	Ash
352010	Reventador	11444	1973	138076	Lava flow(s)	moderate
352010	Reventador	11444	1973	138077	Lahar or mudflow	moderate
352010	Reventador	11444	1973	138078	Blocks
352010	Reventador	11445	1976	138080	Explosion	weak or small
352010	Reventador	11445	1976	138081	Ash
352010	Reventador	11445	1976	138082	Bombs
352010	Reventador	11445	1976	138083	Pyroclastic flow
352010	Reventador	11445	1976	138084	Lava flow(s)	violent, strong, or large
352010	Reventador	11445	1976	138085	Volcanic tremor	Before eruption.
352010	Reventador	11446	2002	138088	Explosion
352010	Reventador	11446	2002	138089	Ash
352010	Reventador	11446	2002	138090	Pyroclastic flow
352010	Reventador	11446	2002	138091	Lava flow(s)
352010	Reventador	11446	2002	138092	Property damage
352010	Reventador	11446	2002	138093	Fatalities			2001		11		3
352010	Reventador	11446	2002	138094	Lahar or mudflow
352010	Reventador	11446	2002	138095	Evacuations
352010	Reventador	11446	2002	138096	Loud audible noises
352010	Reventador	11446	2002	138097	Volcanic tremor
352010	Reventador	11446	2002	138098	Earthquakes (undefined)	Before.
352010	Reventador	11446	2002	138099	Earthquakes (undefined)
352010	Reventador	11446	2002	138100	Ash	Incandescent
352010	Reventador	11446	2002	138101	Fauna kill	Terrestrial.
352010	Reventador	11447	2004	138103	Explosion
352021	Atacazo	11451	-3490	138104	Ash
352021	Atacazo	11451	-3490	138105	Pyroclastic flow
352021	Atacazo	11451	-3490	138106	Lava dome formation
352021	Atacazo	11451	-3490	138107	Pumice
352021	Atacazo	11452	-2490	138109	Explosion
352021	Atacazo	11452	-2490	138110	Ash
352021	Atacazo	11452	-2490	138111	Pyroclastic flow
352021	Atacazo	11452	-2490	138112	Lava dome formation
352021	Atacazo	11452	-2490	138113	Pumice
352021	Atacazo	11453	-320	138115	Explosion
352021	Atacazo	11453	-320	138116	Ash
352021	Atacazo	11453	-320	138117	Pyroclastic flow
352021	Atacazo	11453	-320	138118	Lava dome formation
352021	Atacazo	11453	-320	138119	Pumice
352022	Chacana	11454	-8050	138121	Explosion
352022	Chacana	11454	-8050	138122	Lava flow(s)
352022	Chacana	11455	-1580	138124	Explosion
352022	Chacana	11455	-1580	138125	Ash
352022	Chacana	11456	-50	138126	Lava flow(s)
352022	Chacana	11457	1760	138128	Explosion
352022	Chacana	11457	1760	138129	Ash
352022	Chacana	11457	1760	138130	Bombs
352022	Chacana	11457	1760	138131	Lava flow(s)
352022	Chacana	11457	1760	138132	Property damage
352022	Chacana	11458	1773	138134	Lava flow(s)
352022	Chacana	11458	1773	138135	Property damage
352020	Guagua Pichincha	11467	-1860	138137	Explosion
352020	Guagua Pichincha	11467	-1860	138138	Ash
352020	Guagua Pichincha	11467	-1860	138139	Lava dome formation
352020	Guagua Pichincha	11467	-1860	138140	Blocks
352020	Guagua Pichincha	11468	-1230	138142	Explosion
352020	Guagua Pichincha	11468	-1230	138143	Ash
352020	Guagua Pichincha	11468	-1230	138144	Lava dome formation
352020	Guagua Pichincha	11468	-1230	138145	Blocks
352020	Guagua Pichincha	11469	70	138147	Explosion
352020	Guagua Pichincha	11469	70	138148	Ash
352020	Guagua Pichincha	11469	70	138149	Lapilli
352020	Guagua Pichincha	11469	70	138150	Pyroclastic flow
352020	Guagua Pichincha	11469	70	138151	Pumice
352020	Guagua Pichincha	11470	550	138153	Explosion
352020	Guagua Pichincha	11470	550	138154	Ash
352020	Guagua Pichincha	11470	550	138155	Pyroclastic flow
352020	Guagua Pichincha	11470	550	138156	Lava dome formation
352020	Guagua Pichincha	11470	550	138157	Blocks
352020	Guagua Pichincha	11471	930	138159	Explosion
352020	Guagua Pichincha	11471	930	138160	Ash
352020	Guagua Pichincha	11471	930	138161	Lapilli
352020	Guagua Pichincha	11471	930	138162	Pyroclastic flow
352020	Guagua Pichincha	11471	930	138163	Pumice
352020	Guagua Pichincha	11472	1533	138165	Explosion
352020	Guagua Pichincha	11472	1533	138166	Phreatic activity	Uncertain
352020	Guagua Pichincha	11473	1534	138168	Explosion
352020	Guagua Pichincha	11473	1534	138169	Phreatic activity	Uncertain
352020	Guagua Pichincha	11483	1660	138170	Property damage
352020	Guagua Pichincha	11483	1660	138171	Lahar or mudflow
352020	Guagua Pichincha	11483	1660	138172	Earthquakes (undefined)
352020	Guagua Pichincha	11484	1830	138174	Explosion	weak or small
352020	Guagua Pichincha	11484	1830	138175	Phreatic activity
352020	Guagua Pichincha	11485	1831	138177	Explosion	weak or small
352020	Guagua Pichincha	11485	1831	138178	Phreatic activity
352020	Guagua Pichincha	11486	1868	138180	Explosion	weak or small
352020	Guagua Pichincha	11486	1868	138181	Phreatic activity	weak or small
352020	Guagua Pichincha	11487	1868	138183	Explosion	weak or small
352020	Guagua Pichincha	11487	1868	138184	Phreatic activity	weak or small
352020	Guagua Pichincha	11488	1869	138186	Explosion	weak or small
352020	Guagua Pichincha	11488	1869	138187	Phreatic activity	weak or small
352020	Guagua Pichincha	11489	1869	138189	Explosion	weak or small
352020	Guagua Pichincha	11489	1869	138190	Phreatic activity	weak or small
352020	Guagua Pichincha	11490	1881	138192	Explosion	weak or small
352020	Guagua Pichincha	11490	1881	138193	Phreatic activity
352020	Guagua Pichincha	11491	1981	138195	Ash
352020	Guagua Pichincha	11491	1981	138196	Phreatic activity	weak or small
352020	Guagua Pichincha	11491	1981	138197	Seismicity (volcanic)	Before eruption.
352020	Guagua Pichincha	11491	1981	138198	Blocks
352020	Guagua Pichincha	11492	1985	138200	Phreatic activity
352020	Guagua Pichincha	11493	1990	138202	Phreatic activity
352020	Guagua Pichincha	11499	2002	138203	Phreatic activity
352020	Guagua Pichincha	11499	2002	138204	Volcanic tremor
352020	Guagua Pichincha	11499	2002	138205	Earthquakes (undefined)
352020	Guagua Pichincha	11500	2003	138207	Phreatic activity
352020	Guagua Pichincha	11501	2008	138209	Phreatic activity	Uncertain
352020	Guagua Pichincha	11501	2008	138210	Earthquakes (undefined)	Before.
352020	Guagua Pichincha	11502	2009	138212	Phreatic activity	Uncertain
352020	Guagua Pichincha	11502	2009	138213	Earthquakes (undefined)
352031	Aliso	11503	-2450	138215	Explosion
352031	Aliso	11503	-2450	138216	Pyroclastic flow
352030	Antisana	11505	1728	138220	Lava flow(s)
352040	Sumaco	11507	1650	138227	Explosion
352040	Sumaco	11508	1895	138229	Explosion
352040	Sumaco	11509	1933	138231	Explosion
352050	Cotopaxi	11510	-7690	138233	Explosion
352050	Cotopaxi	11510	-7690	138234	Ash
352050	Cotopaxi	11510	-7690	138235	Lapilli
352050	Cotopaxi	11516	-3280	138236	Lahar or mudflow
352050	Cotopaxi	11516	-3280	138237	Pumice
352050	Cotopaxi	11517	-2640	138239	Explosion
352050	Cotopaxi	11517	-2640	138240	Pyroclastic flow
352050	Cotopaxi	11517	-2640	138241	Property damage
352050	Cotopaxi	11517	-2640	138242	Fatalities			-455					180
352050	Cotopaxi	11517	-2640	138243	Lahar or mudflow
352050	Cotopaxi	11517	-2640	138244	Edifice destroyed	Collapse/avalanche
352050	Cotopaxi	11517	-2640	138245	Debris avalanches
352050	Cotopaxi	11518	-2250	138247	Lava flow(s)
352050	Cotopaxi	11519	-2220	138249	Explosion
352050	Cotopaxi	11519	-2220	138250	Bombs
352050	Cotopaxi	11519	-2220	138251	Scoria
352050	Cotopaxi	11519	-2220	138252	Lahar or mudflow
352050	Cotopaxi	11519	-2220	138253	Pumice
352050	Cotopaxi	11520	-2050	138255	Explosion
352050	Cotopaxi	11520	-2050	138256	Tephra
352050	Cotopaxi	11520	-2050	138257	Lava flow(s)
352050	Cotopaxi	11521	-1510	138259	Explosion
352050	Cotopaxi	11521	-1510	138260	Scoria
352050	Cotopaxi	11521	-1510	138261	Pumice
352050	Cotopaxi	11522	-1050	138263	Explosion
352050	Cotopaxi	11522	-1050	138264	Scoria
352050	Cotopaxi	11522	-1050	138265	Pyroclastic flow
352050	Cotopaxi	11522	-1050	138266	Lava flow(s)
352050	Cotopaxi	11523	-400	138268	Explosion
352050	Cotopaxi	11531	740	138269	Pyroclastic flow
352050	Cotopaxi	11531	740	138270	Lava flow(s)
352050	Cotopaxi	11532	770	138272	Explosion
352050	Cotopaxi	11532	770	138273	Lapilli
352050	Cotopaxi	11532	770	138274	Scoria
352050	Cotopaxi	11532	770	138275	Pyroclastic flow
352050	Cotopaxi	11532	770	138276	Lava flow(s)
352050	Cotopaxi	11533	950	138278	Explosion
352050	Cotopaxi	11533	950	138279	Lapilli
352050	Cotopaxi	11533	950	138280	Pyroclastic flow
352050	Cotopaxi	11534	1130	138282	Explosion
352050	Cotopaxi	11534	1130	138283	Pyroclastic flow
352050	Cotopaxi	11534	1130	138284	Pumice
352050	Cotopaxi	11535	1260	138286	Explosion
352050	Cotopaxi	11535	1260	138287	Tephra
352050	Cotopaxi	11535	1260	138288	Lava flow(s)	Uncertain
357010	Tupungatito	11536	1961	138290	Explosion
352050	Cotopaxi	11537	1350	138292	Explosion
352050	Cotopaxi	11537	1350	138293	Lava flow(s)	Uncertain
352050	Cotopaxi	11537	1350	138294	Pumice
352050	Cotopaxi	11538	1532	138296	Explosion
352050	Cotopaxi	11538	1532	138297	Ash
352050	Cotopaxi	11538	1532	138298	Lapilli
352050	Cotopaxi	11538	1532	138299	Lava flow(s)
352050	Cotopaxi	11538	1532	138300	Property damage
352050	Cotopaxi	11538	1532	138301	Lahar or mudflow	Uncertain
352050	Cotopaxi	11546	1743	138303	Explosion
352050	Cotopaxi	11546	1743	138304	Pyroclastic flow
352050	Cotopaxi	11546	1743	138305	Property damage
352050	Cotopaxi	11546	1743	138306	Lahar or mudflow
352050	Cotopaxi	11547	1743	138308	Explosion
352050	Cotopaxi	11547	1743	138309	Pyroclastic flow
352050	Cotopaxi	11547	1743	138310	Lahar or mudflow
352050	Cotopaxi	11548	1744	138312	Explosion
352050	Cotopaxi	11548	1744	138313	Ash	violent, strong, or large
352050	Cotopaxi	11548	1744	138314	Pyroclastic flow
352050	Cotopaxi	11548	1744	138315	Lava flow(s)	Uncertain
352050	Cotopaxi	11548	1744	138316	Property damage
352050	Cotopaxi	11548	1744	138317	Lahar or mudflow
352050	Cotopaxi	11549	1746	138319	Explosion
352050	Cotopaxi	11550	1747	138321	Explosion
352050	Cotopaxi	11551	1750	138323	Explosion
352050	Cotopaxi	11552	1766	138325	Explosion
352050	Cotopaxi	11552	1766	138326	Pyroclastic flow
352050	Cotopaxi	11552	1766	138327	Property damage
352050	Cotopaxi	11552	1766	138328	Lahar or mudflow
352050	Cotopaxi	11553	1768	138330	Explosion	violent, strong, or large
352050	Cotopaxi	11553	1768	138331	Ash	violent, strong, or large
352050	Cotopaxi	11553	1768	138332	Scoria
352050	Cotopaxi	11553	1768	138333	Pyroclastic flow
352050	Cotopaxi	11553	1768	138334	Property damage
352050	Cotopaxi	11563	1855	138336	Explosion
352050	Cotopaxi	11563	1855	138337	Ash	violent, strong, or large
352050	Cotopaxi	11563	1855	138338	Pyroclastic flow
352050	Cotopaxi	11563	1855	138339	Lahar or mudflow
352050	Cotopaxi	11564	1856	138341	Explosion
352050	Cotopaxi	11564	1856	138342	Pyroclastic flow
352050	Cotopaxi	11564	1856	138343	Lahar or mudflow
352050	Cotopaxi	11565	1856	138345	Explosion
352050	Cotopaxi	11565	1856	138346	Pyroclastic flow
352050	Cotopaxi	11565	1856	138347	Lahar or mudflow
352050	Cotopaxi	11566	1857	138349	Explosion
352050	Cotopaxi	11567	1858	138351	Explosion
352050	Cotopaxi	11567	1858	138352	Pyroclastic flow
352050	Cotopaxi	11567	1858	138353	Lahar or mudflow
352050	Cotopaxi	11568	1859	138355	Explosion
352050	Cotopaxi	11569	1860	138357	Explosion
352050	Cotopaxi	11570	1863	138359	Explosion
352050	Cotopaxi	11570	1863	138360	Pyroclastic flow
352050	Cotopaxi	11570	1863	138361	Lahar or mudflow
352050	Cotopaxi	11571	1866	138363	Explosion
352050	Cotopaxi	11572	1867	138365	Explosion
352050	Cotopaxi	11573	1868	138367	Explosion
352050	Cotopaxi	11582	1883	138368	Explosion
352050	Cotopaxi	11582	1883	138369	Pyroclastic flow
352050	Cotopaxi	11582	1883	138370	Lahar or mudflow
352050	Cotopaxi	11583	1885	138372	Explosion
352050	Cotopaxi	11583	1885	138373	Pyroclastic flow
352050	Cotopaxi	11583	1885	138374	Lahar or mudflow
352050	Cotopaxi	11584	1886	138376	Explosion
352050	Cotopaxi	11585	1895	138378	Explosion
352050	Cotopaxi	11586	1903	138380	Explosion
352050	Cotopaxi	11586	1903	138381	Pyroclastic flow
352050	Cotopaxi	11586	1903	138382	Lahar or mudflow
352050	Cotopaxi	11587	1905	138384	Explosion
352050	Cotopaxi	11588	1906	138386	Explosion
352050	Cotopaxi	11589	1907	138388	Explosion
352050	Cotopaxi	11590	1908	138390	Explosion
352050	Cotopaxi	11591	1922	138392	Explosion
352050	Cotopaxi	11592	1926	138394	Explosion
352050	Cotopaxi	11593	1931	138396	Explosion
352050	Cotopaxi	11594	1939	138398	Explosion
352050	Cotopaxi	11595	1940	138400	Explosion
352071	Chimborazo	11603	-7500	138401	Ash
352071	Chimborazo	11603	-7500	138402	Pyroclastic flow
352071	Chimborazo	11603	-7500	138403	Lahar or mudflow
352071	Chimborazo	11604	-5410	138404	Explosion
352071	Chimborazo	11604	-5410	138405	Ash
352071	Chimborazo	11604	-5410	138406	Pyroclastic flow
352071	Chimborazo	11604	-5410	138407	Lahar or mudflow
352071	Chimborazo	11605	-4130	138408	Explosion
352071	Chimborazo	11605	-4130	138409	Ash
352071	Chimborazo	11605	-4130	138410	Pyroclastic flow
352071	Chimborazo	11606	-2500	138411	Explosion
352071	Chimborazo	11606	-2500	138412	Ash
352071	Chimborazo	11606	-2500	138413	Pyroclastic flow
352071	Chimborazo	11607	270	138414	Explosion
352071	Chimborazo	11607	270	138415	Ash
352071	Chimborazo	11607	270	138416	Pyroclastic flow
352071	Chimborazo	11608	550	138417	Explosion
352071	Chimborazo	11608	550	138418	Ash
352071	Chimborazo	11608	550	138419	Pyroclastic flow
352080	Tungurahua	11609	-7750	138421	Explosion
352080	Tungurahua	11609	-7750	138422	Scoria
352080	Tungurahua	11609	-7750	138423	Pyroclastic flow
352080	Tungurahua	11610	-1010	138425	Explosion
352080	Tungurahua	11610	-1010	138426	Pyroclastic flow
352080	Tungurahua	11610	-1010	138427	Lava flow(s)
352080	Tungurahua	11610	-1010	138428	Property damage
352080	Tungurahua	11610	-1010	138429	Fatalities			-1010
352080	Tungurahua	11610	-1010	138430	Lahar or mudflow
352080	Tungurahua	11610	-1010	138431	Edifice destroyed	Collapse/avalanche
352080	Tungurahua	11610	-1010	138432	Debris avalanches
352080	Tungurahua	11618	480	138434	Ash
352080	Tungurahua	11619	600	138436	Explosion
352080	Tungurahua	11619	600	138437	Ash
352080	Tungurahua	11619	600	138438	Lapilli
352080	Tungurahua	11619	600	138439	Scoria
352080	Tungurahua	11619	600	138440	Pyroclastic flow
352080	Tungurahua	11619	600	138441	Pumice
352080	Tungurahua	11619	600	138442	Blocks
352080	Tungurahua	11620	730	138444	Explosion
352080	Tungurahua	11620	730	138445	Scoria
352080	Tungurahua	11620	730	138446	Pyroclastic flow
352080	Tungurahua	11620	730	138447	Pumice
352080	Tungurahua	11620	730	138448	Blocks
352080	Tungurahua	11621	800	138450	Explosion
352080	Tungurahua	11621	800	138451	Ash
352080	Tungurahua	11621	800	138452	Scoria
352080	Tungurahua	11621	800	138453	Pyroclastic flow
352080	Tungurahua	11621	800	138454	Blocks
352080	Tungurahua	11622	1030	138456	Explosion
352080	Tungurahua	11622	1030	138457	Bombs
352080	Tungurahua	11622	1030	138458	Pyroclastic flow
352080	Tungurahua	11622	1030	138459	Ash
352080	Tungurahua	11623	1250	138461	Explosion
352080	Tungurahua	11623	1250	138462	Scoria
352080	Tungurahua	11623	1250	138463	Pyroclastic flow
352080	Tungurahua	11624	1350	138465	Explosion
352080	Tungurahua	11624	1350	138466	Ash
352080	Tungurahua	11634	1777	138468	Explosion	Uncertain
352080	Tungurahua	11634	1777	138469	Lava flow(s)	Uncertain
352080	Tungurahua	11634	1777	138470	Earthquakes (undefined)
352080	Tungurahua	11635	1781	138472	Lava flow(s)	Uncertain
352080	Tungurahua	11636	1857	138474	Explosion
352080	Tungurahua	11637	1885	138476	Explosion
352080	Tungurahua	11638	1886	138478	Explosion
352080	Tungurahua	11638	1886	138479	Pyroclastic flow
352080	Tungurahua	11638	1886	138480	Lava flow(s)
352080	Tungurahua	11638	1886	138481	Property damage
352080	Tungurahua	11638	1886	138482	Fatalities			1886		1		12
352080	Tungurahua	11638	1886	138483	Lahar or mudflow
352080	Tungurahua	11638	1886	138484	Earthquakes (undefined)
352080	Tungurahua	11639	1900	138486	Explosion	Uncertain
352080	Tungurahua	11639	1900	138487	Volcanic smoke
352080	Tungurahua	11640	1916	138489	Explosion
352080	Tungurahua	11640	1916	138490	Ash
352080	Tungurahua	11640	1916	138491	Bombs
352080	Tungurahua	11640	1916	138492	Pyroclastic flow	violent, strong, or large
352080	Tungurahua	11640	1916	138493	Phreatic activity
352080	Tungurahua	11640	1916	138494	Lava flow(s)
352080	Tungurahua	11640	1916	138495	Property damage
352080	Tungurahua	11640	1916	138496	Lahar or mudflow
352080	Tungurahua	11640	1916	138497	Eruption cloud
352080	Tungurahua	11640	1916	138498	Lightning
352080	Tungurahua	11644	2010	138500	Blocks
352080	Tungurahua	11645	2010	138505	Lava flow(s)
352080	Tungurahua	11645	2010	138506	Property damage
352080	Tungurahua	11645	2010	138508	Evacuations
352080	Tungurahua	11645	2010	138509	Loud audible noises
352080	Tungurahua	11645	2010	138510	Volcanic tremor
352090	Sangay	11646	1628	138512	Explosion
352090	Sangay	11646	1628	138513	Ash
352090	Sangay	11646	1628	138514	Property damage
352090	Sangay	11647	1728	138516	Explosion
352090	Sangay	11647	1728	138517	Ash
352090	Sangay	11647	1728	138518	Bombs
352090	Sangay	11647	1728	138519	Pyroclastic flow
352090	Sangay	11647	1728	138520	Lava flow(s)
352090	Sangay	11647	1728	138521	Lava dome formation
352090	Sangay	11647	1728	138522	Eruption cloud
352090	Sangay	11647	1728	138523	Cinder cone formation
352090	Sangay	11648	1934	138527	Explosion
352090	Sangay	11648	1934	138528	Ash
352090	Sangay	11648	1934	138529	Scoria
352090	Sangay	11648	1934	138530	Pyroclastic flow
352090	Sangay	11648	1934	138531	Lava flow(s)
352090	Sangay	11648	1934	138532	Lava dome formation
353010	Fernandina	11662	1937	138534	Lava flow(s)	Uncertain
353010	Fernandina	11663	1958	138536	Lava flow(s)
353010	Fernandina	11663	1958	138537	Lava lake
353010	Fernandina	11664	1961	138540	Explosion
353010	Fernandina	11664	1961	138541	Lava flow(s)
353010	Fernandina	11665	1968	138544	Explosion
353010	Fernandina	11665	1968	138545	Lava flow(s)
353010	Fernandina	11665	1968	138546	Lava fountains
353010	Fernandina	11665	1968	138547	Earthquake (tectonic)	Before eruption.
353010	Fernandina	11665	1968	138548	Lava flow(s)	Entered water.
353010	Fernandina	11666	1968	138550	Explosion
353010	Fernandina	11666	1968	138551	Ash
353010	Fernandina	11666	1968	138552	Pyroclastic flow
353010	Fernandina	11666	1968	138553	Phreatic activity
353010	Fernandina	11666	1968	138554	Lava flow(s)
353010	Fernandina	11666	1968	138555	Caldera formation	Lava effusion
353010	Fernandina	11666	1968	138556	Debris avalanches
353010	Fernandina	11666	1968	138557	Eruption cloud
353010	Fernandina	11666	1968	138558	Seismicity (volcanic)	Before eruption.
353010	Fernandina	11666	1968	138559	Seismicity (volcanic)
353010	Fernandina	11666	1968	138560	Lightning
353010	Fernandina	11667	1972	138562	Explosion	weak or small
353010	Fernandina	11667	1972	138563	Tephra
353010	Fernandina	11667	1972	138564	Lava flow(s)
353010	Fernandina	11667	1972	138565	Earthquakes (undefined)	After.
353010	Fernandina	11674	1991	138567	Explosion
353010	Fernandina	11674	1991	138568	Ash
353010	Fernandina	11674	1991	138569	Lava flow(s)
353010	Fernandina	11674	1991	138570	Lava fountains
353010	Fernandina	11674	1991	138571	Eruption cloud
353010	Fernandina	11675	1995	138573	Explosion
353010	Fernandina	11675	1995	138574	Ash
353010	Fernandina	11675	1995	138575	Scoria
353010	Fernandina	11675	1995	138576	Lava flow(s)
353010	Fernandina	11675	1995	138577	Lava fountains
353010	Fernandina	11675	1995	138578	Earthquake (tectonic)	Before eruption.
353010	Fernandina	11675	1995	138579	Fauna kill	Aquatic.
353010	Fernandina	11675	1995	138580	Fauna kill	Terrestrial.
353010	Fernandina	11675	1995	138581	Lava flow(s)	Entered water.
353010	Fernandina	11676	2005	138584	Explosion
353010	Fernandina	11676	2005	138585	Ash
353010	Fernandina	11676	2005	138586	Lava flow(s)
353010	Fernandina	11676	2005	138587	Earthquakes (undefined)	Before.
353010	Fernandina	11677	2009	138589	Explosion
353010	Fernandina	11677	2009	138590	Ash
353010	Fernandina	11677	2009	138591	Lava flow(s)
353010	Fernandina	11677	2009	138592	Lava fountains
353010	Fernandina	11677	2009	138593	Fauna kill	Aquatic.
353010	Fernandina	11677	2009	138594	Lava flow(s)	Entered water.
353020	Wolf	11678	150	138596	Lava flow(s)
353020	Wolf	11679	950	138598	Lava flow(s)
353040	Alcedo	11694	1953	138600	Lava flow(s)
353040	Alcedo	11696	1993	138603	Ash
353040	Alcedo	11696	1993	138604	Phreatic activity
353040	Alcedo	11696	1993	138605	Loud audible noises
353040	Alcedo	11696	1993	138606	Crater formation	Summit.
353040	Alcedo	11696	1993	138607	Volcanic tremor
353050	Negra, Sierra	11697	-8250	138608	Lava flow(s)
353050	Negra, Sierra	11698	-1250	138610	Lava flow(s)
353050	Negra, Sierra	11699	370	138611	Lava flow(s)
353050	Negra, Sierra	11700	1060	138612	Lava flow(s)
353050	Negra, Sierra	11701	1350	138613	Lava flow(s)
353050	Negra, Sierra	11702	1813	138614	Explosion
353050	Negra, Sierra	11702	1813	138615	Volcanic smoke
353050	Negra, Sierra	11704	1844	138617	Lava flow(s)
353050	Negra, Sierra	11705	1860	138618	Explosion
353050	Negra, Sierra	11707	1948	138621	Explosion
353050	Negra, Sierra	11707	1948	138622	Ash
353050	Negra, Sierra	11707	1948	138623	Lava flow(s)	Uncertain
353050	Negra, Sierra	11708	1953	138626	Explosion
353050	Negra, Sierra	11708	1953	138627	Lava flow(s)
353050	Negra, Sierra	11708	1953	138628	Lava fountains	Uncertain
353050	Negra, Sierra	11708	1953	138629	Eruption cloud
353050	Negra, Sierra	11708	1953	138630	Glow
353050	Negra, Sierra	11708	1953	138631	Lava flow(s)	Entered water.
353050	Negra, Sierra	11713	2005	138632	Scoria
353050	Negra, Sierra	11713	2005	138633	Lava flow(s)
353050	Negra, Sierra	11713	2005	138634	Lava lake
353050	Negra, Sierra	11713	2005	138635	Lava fountains
353050	Negra, Sierra	11713	2005	138636	Earthquakes (undefined)	Before.
353050	Negra, Sierra	11713	2005	138637	Earthquakes (undefined)
353050	Negra, Sierra	11713	2005	138638	Deformation (inflation)
353050	Negra, Sierra	11713	2005	138639	Deformation (deflation)
353060	Azul, Cerro	11714	-950	138640	Lava flow(s)
353060	Azul, Cerro	11715	-550	138641	Lava flow(s)
353060	Azul, Cerro	11716	1250	138642	Lava flow(s)
353060	Azul, Cerro	11717	1850	138643	Lava flow(s)
353060	Azul, Cerro	11719	1940	138646	Lava flow(s)
353060	Azul, Cerro	11720	2008	138650	Explosion
353060	Azul, Cerro	11720	2008	138651	Ash
353060	Azul, Cerro	11720	2008	138652	Lava flow(s)
353060	Azul, Cerro	11720	2008	138653	Lava fountains
353060	Azul, Cerro	11722	1943	138656	Explosion
353060	Azul, Cerro	11722	1943	138657	Lava flow(s)
353060	Azul, Cerro	11722	1943	138658	Fatalities			1943		4		13	2
353060	Azul, Cerro	11723	1948	138659	Lava flow(s)
353060	Azul, Cerro	11724	1949	138662	Lava flow(s)
354000	Quimsachata	11736	-4450	138666	Lava dome formation
354000	Quimsachata	11736	-4450	138667	Lahar or mudflow
354004	Andahua-Orcopampa	11737	-2110	138669	Explosion
354004	Andahua-Orcopampa	11737	-2110	138670	Scoria
354004	Andahua-Orcopampa	11737	-2110	138671	Lava flow(s)
354004	Andahua-Orcopampa	11737	-2110	138672	Cinder cone formation
354004	Andahua-Orcopampa	11738	-940	138674	Explosion
354004	Andahua-Orcopampa	11738	-940	138675	Ash
354004	Andahua-Orcopampa	11738	-940	138676	Lava flow(s)
354004	Andahua-Orcopampa	11738	-940	138677	Cinder cone formation
354004	Andahua-Orcopampa	11739	1490	138679	Explosion
354004	Andahua-Orcopampa	11739	1490	138680	Ash
354004	Andahua-Orcopampa	11739	1490	138681	Lava flow(s)
354004	Andahua-Orcopampa	11739	1490	138682	Cinder cone formation
354005	Huambo	11741	-700	138685	Explosion
354005	Huambo	11741	-700	138686	Scoria
354005	Huambo	11741	-700	138687	Lava flow(s)
354005	Huambo	11741	-700	138688	Cinder cone formation
354006	Sabancaya	11742	-6600	138689	Explosion
354006	Sabancaya	11742	-6600	138690	Ash
354006	Sabancaya	11742	-6600	138691	Phreatomagmatic eruption
354006	Sabancaya	11743	-3490	138692	Lava flow(s)
354006	Sabancaya	11744	1350	138693	Explosion
354006	Sabancaya	11744	1350	138694	Ash
354006	Sabancaya	11745	1750	138695	Explosion	Uncertain
354006	Sabancaya	11746	1784	138696	Explosion	Uncertain
354006	Sabancaya	11746	1784	138697	Property damage
354010	Misti, El	11755	-4020	138698	Pyroclastic flow
354010	Misti, El	11756	-3510	138700	Explosion
354010	Misti, El	11756	-3510	138701	Pyroclastic flow
354010	Misti, El	11757	-2230	138703	Explosion
354010	Misti, El	11758	-310	138705	Explosion
354010	Misti, El	11758	-310	138706	Pyroclastic flow
354010	Misti, El	11758	-310	138707	Pumice
354010	Misti, El	11759	-80	138709	Explosion
354010	Misti, El	11759	-80	138710	Pyroclastic flow
354010	Misti, El	11759	-80	138711	Lahar or mudflow
354010	Misti, El	11759	-80	138712	Debris avalanches	Uncertain
354010	Misti, El	11759	-80	138713	Pumice
354010	Misti, El	11760	90	138715	Explosion
354010	Misti, El	11760	90	138716	Pumice
354010	Misti, El	11761	760	138718	Explosion
354010	Misti, El	11761	760	138719	Pumice
354010	Misti, El	11762	1350	138721	Explosion
354010	Misti, El	11762	1350	138722	Ash
354010	Misti, El	11762	1350	138723	Pyroclastic flow
354010	Misti, El	11762	1350	138724	Blocks
354010	Misti, El	11763	1454	138726	Explosion
354010	Misti, El	11763	1454	138727	Ash
354010	Misti, El	11763	1454	138728	Property damage
354010	Misti, El	11763	1454	138729	Evacuations
354010	Misti, El	11773	1870	138732	Phreatic activity	Uncertain
354010	Misti, El	11773	1870	138733	Fumarolic or solfataric	Uncertain
354010	Misti, El	11774	1985	138735	Ash	weak or small
354010	Misti, El	11774	1985	138736	Phreatic activity
354020	Ubinas	11775	-8560	138738	Explosion
354020	Ubinas	11775	-8560	138739	Ash
354020	Ubinas	11775	-8560	138740	Lapilli
354020	Ubinas	11776	-6850	138742	Explosion
354020	Ubinas	11776	-6850	138743	Ash
354020	Ubinas	11776	-6850	138744	Pumice
354020	Ubinas	11777	1082	138746	Explosion
354020	Ubinas	11777	1082	138747	Ash
354020	Ubinas	11777	1082	138748	Lapilli
354020	Ubinas	11777	1082	138749	Phreatic activity
354020	Ubinas	11777	1082	138750	Pumice
354020	Ubinas	11778	1550	138752	Explosion
354020	Ubinas	11778	1550	138753	Ash
354020	Ubinas	11780	1662	138756	Explosion
354020	Ubinas	11780	1662	138757	Scoria
354020	Ubinas	11781	1667	138759	Explosion
354020	Ubinas	11781	1667	138760	Ash
354020	Ubinas	11782	1677	138762	Explosion
354020	Ubinas	11782	1677	138763	Ash
354031	Ticsani	11793	1800	138764	Explosion
354031	Ticsani	11793	1800	138765	Bombs
354031	Ticsani	11793	1800	138766	Lava dome formation
354031	Ticsani	11793	1800	138767	Pumice
354030	Huaynaputina	11794	-7750	138769	Explosion
354030	Huaynaputina	11794	-7750	138770	Pumice
354030	Huaynaputina	11795	1600	138773	Explosion
354030	Huaynaputina	11795	1600	138774	Ash
354030	Huaynaputina	11795	1600	138775	Pyroclastic flow
354030	Huaynaputina	11795	1600	138776	Property damage
354030	Huaynaputina	11795	1600	138777	Fatalities			1600		2		19
354030	Huaynaputina	11795	1600	138778	Lahar or mudflow
354030	Huaynaputina	11795	1600	138779	Evacuations
354030	Huaynaputina	11795	1600	138780	Earthquakes (undefined)	Before.
354030	Huaynaputina	11795	1600	138781	Earthquakes (undefined)
354030	Huaynaputina	11795	1600	138782	Lightning
354030	Huaynaputina	11795	1600	138783	Pumice
354030	Huaynaputina	11795	1600	138784	Blocks
354030	Huaynaputina	11795	1600	138785	Fauna kill	Aquatic.
354030	Huaynaputina	11795	1600	138786	Fauna kill	Terrestrial.
354050	Yucamane	11796	-1320	138788	Explosion
354050	Yucamane	11796	-1320	138789	Pumice
354040	Tutupaca	11797	1780	138790	Explosion
354040	Tutupaca	11799	1802	138792	Explosion
354040	Tutupaca	11799	1802	138793	Ash
354040	Tutupaca	11800	1862	138794	Explosion
354040	Tutupaca	11801	1902	138795	Explosion
355011	Taapaca	11802	-7900	138796	Explosion
355010	Tacora	11816	1937	138798	Explosion	Uncertain
355020	Guallatiri	11817	1825	138800	Ash
355020	Guallatiri	11819	1913	138803	Explosion
355020	Guallatiri	11819	1913	138804	Ash	Incandescent
355020	Guallatiri	11820	1959	138806	Explosion	weak or small
355020	Guallatiri	11820	1959	138807	Scoria
355020	Guallatiri	11820	1959	138808	Ash	Incandescent
355020	Guallatiri	11821	1960	138810	Explosion
355020	Guallatiri	11822	1985	138811	Phreatic activity	Uncertain
355040	Irruputuncu	11828	1995	138818	Phreatic activity
355070	San Pedro-San Pablo	11834	1901	138825	Property damage
355070	San Pedro-San Pablo	11835	1911	138826	Explosion
355100	Lascar	11855	1933	138831	Explosion
355100	Lascar	11855	1933	138832	Tephra
355100	Lascar	11856	1940	138833	Explosion
355100	Lascar	11856	1940	138834	Tephra
355100	Lascar	11857	1951	138836	Ash
355100	Lascar	11859	1959	138839	Explosion	weak or small
355100	Lascar	11859	1959	138840	Ash
355100	Lascar	11859	1959	138841	Phreatic activity
355100	Lascar	11861	1972	138843	Explosion	Uncertain
355100	Lascar	11861	1972	138844	Fumarolic or solfataric	Uncertain
355100	Lascar	11862	1974	138846	Explosion	Uncertain
355100	Lascar	11862	1974	138847	Fumarolic or solfataric	Uncertain
355100	Lascar	11863	1984	138849	Lava dome formation
355100	Lascar	11864	1986	138851	Explosion
355100	Lascar	11864	1986	138852	Ash
355100	Lascar	11864	1986	138853	Eruption cloud
355100	Lascar	11864	1986	138854	Blocks
355100	Lascar	11865	1987	138856	Ash
355100	Lascar	11865	1987	138857	Lapilli
355100	Lascar	11865	1987	138858	Bombs
355100	Lascar	11865	1987	138859	Phreatic activity
355100	Lascar	11865	1987	138860	Lava dome formation
355100	Lascar	11865	1987	138861	Loud audible noises
355100	Lascar	11865	1987	138862	Volcanic tremor
355100	Lascar	11873	2000	138864	Explosion			2000		7		21
355100	Lascar	11873	2000	138865	Ash
355100	Lascar	11873	2000	138866	Earthquakes (undefined)	Before.
355100	Lascar	11875	2002	138870	Explosion
355100	Lascar	11875	2002	138871	Ash
355100	Lascar	11876	2003	138873	Ash	Uncertain
355100	Lascar	11876	2003	138874	Phreatic activity	Uncertain
355100	Lascar	11877	2005	138876	Explosion
355100	Lascar	11877	2005	138877	Ash
355100	Lascar	11878	2006	138879	Explosion
355100	Lascar	11878	2006	138880	Ash
355100	Lascar	11878	2006	138881	Phreatic activity
355110	Llullaillaco	11879	1854	138882	Explosion
355110	Llullaillaco	11880	1868	138884	Lava flow(s)	Uncertain
355110	Llullaillaco	11881	1877	138885	Explosion
355130	Ojos del Salado, Nevados	11882	750	138887	Explosion
355130	Ojos del Salado, Nevados	11882	750	138888	Pyroclastic flow
355130	Ojos del Salado, Nevados	11882	750	138889	Pumice
355130	Ojos del Salado, Nevados	11883	1993	138891	Ash	Uncertain
355130	Ojos del Salado, Nevados	11883	1993	138892	Phreatic activity
355160	Aracar	11884	1993	138894	Explosion	Uncertain
355160	Aracar	11884	1993	138895	Ash	Uncertain
357010	Tupungatito	11899	1987	138897	Explosion
357021	Maipo	11901	1822	138899	Earthquakes (undefined)
357021	Maipo	11902	1826	138902	Explosion
357021	Maipo	11902	1826	138903	Ash
357021	Maipo	11902	1826	138904	Tephra
357021	Maipo	11902	1826	138905	Lava flow(s)
357021	Maipo	11902	1826	138906	Cinder cone formation
357021	Maipo	11903	1829	138907	Explosion
357021	Maipo	11903	1829	138908	Volcanic smoke
357021	Maipo	11903	1829	138909	Earthquakes (undefined)
357021	Maipo	11904	1831	138910	Explosion	Uncertain
357021	Maipo	11904	1831	138911	Ash	Uncertain
357021	Maipo	11904	1831	138912	Lahar or mudflow	weak or small
357021	Maipo	11904	1831	138913	Debris avalanches
357021	Maipo	11905	1833	138914	Explosion	Uncertain
357021	Maipo	11906	1835	138915	Explosion	Uncertain
357021	Maipo	11907	1837	138916	Explosion	Uncertain
357021	Maipo	11908	1869	138917	Explosion	Uncertain
357021	Maipo	11908	1869	138918	Tephra	Uncertain
357021	Maipo	11908	1869	138919	Loud audible noises
357021	Maipo	11908	1869	138920	Earthquakes (undefined)
357021	Maipo	11909	1881	138921	Explosion	Uncertain
357120	Villarrica	11910	1880	138923	Explosion
357120	Villarrica	11910	1880	138924	Tephra
357021	Maipo	11911	1905	138925	Explosion
357021	Maipo	11911	1905	138926	Earthquakes (undefined)
357021	Maipo	11912	1908	138927	Explosion	Uncertain
357021	Maipo	11913	1912	138928	Explosion
357040	Planchon-Peteroa	11926	-5080	138929	Phreatomagmatic eruption
357040	Planchon-Peteroa	11927	900	138931	Explosion
357040	Planchon-Peteroa	11927	900	138932	Ash
357040	Planchon-Peteroa	11927	900	138933	Lapilli
357040	Planchon-Peteroa	11927	900	138934	Pumice
357040	Planchon-Peteroa	11929	1751	138937	Explosion
357040	Planchon-Peteroa	11930	1762	138939	Explosion
357040	Planchon-Peteroa	11930	1762	138940	Ash
357040	Planchon-Peteroa	11930	1762	138941	Property damage
357040	Planchon-Peteroa	11930	1762	138942	Lahar or mudflow
357040	Planchon-Peteroa	11930	1762	138943	Debris avalanches
357040	Planchon-Peteroa	11932	1837	138946	Explosion
357040	Planchon-Peteroa	11932	1837	138947	Lava flow(s)
357040	Planchon-Peteroa	11932	1837	138948	Property damage
357040	Planchon-Peteroa	11932	1837	138949	Lahar or mudflow
357040	Planchon-Peteroa	11932	1837	138950	Cinder cone formation
357040	Planchon-Peteroa	11934	1860	138953	Explosion
357040	Planchon-Peteroa	11938	1889	138958	Explosion
357040	Planchon-Peteroa	11939	1937	138960	Explosion
357040	Planchon-Peteroa	11939	1937	138961	Ash
357040	Planchon-Peteroa	11947	2010	138962	Explosion	Multiple explosions with ash emissions were reported.		2010		9		6
357040	Planchon-Peteroa	11947	2010	138964	Earthquake (tectonic)	At 0647, SERNAGEOMIN recorded an M 5.2 earthquake at 13.4 km depth, located ~15 km SE of the volcano.		2010		9		6
357040	Planchon-Peteroa	11947	2010	138965	Phreatomagmatic eruption	SERNAGEOMIN reported that the explosions were probably phreatomagmatic (caused by the interaction of water with magma at depth inside the volcano).		2010		9		6
357050	Descabezado Grande	11948	1932	138967	Explosion
357050	Descabezado Grande	11948	1932	138968	Ash
357050	Descabezado Grande	11948	1932	138969	Phreatic activity
357050	Descabezado Grande	11948	1932	138970	Crater formation	Parasitic.
357050	Descabezado Grande	11948	1932	138971	Blocks
357063	Longavi, Nevado de	11949	-4890	138972	Explosion
357063	Longavi, Nevado de	11949	-4890	138973	Pumice
357060	Azul, Cerro	11950	1846	138975	Explosion	weak or small
357060	Azul, Cerro	11950	1846	138976	Lava flow(s)	violent, strong, or large
357060	Azul, Cerro	11950	1846	138977	Lightning
357060	Azul, Cerro	11951	1903	138979	Phreatic activity	Uncertain
357060	Azul, Cerro	11952	1906	138981	Explosion
357060	Azul, Cerro	11952	1906	138982	Phreatic activity
357060	Azul, Cerro	11953	1907	138984	Explosion
357060	Azul, Cerro	11953	1907	138985	Phreatic activity
357060	Azul, Cerro	11954	1912	138987	Explosion
357060	Azul, Cerro	11954	1912	138988	Ash
357060	Azul, Cerro	11954	1912	138989	Phreatic activity
357060	Azul, Cerro	11955	1913	138991	Phreatic activity	Uncertain
357060	Azul, Cerro	11955	1913	138992	Volcanic smoke
357060	Azul, Cerro	11956	1914	138994	Explosion
357070	Chillan, Nevados de	11965	-1510	138995	Explosion
357070	Chillan, Nevados de	11965	-1510	138996	Ash
357070	Chillan, Nevados de	11965	-1510	138997	Pyroclastic flow
357070	Chillan, Nevados de	11966	-320	138998	Explosion
357070	Chillan, Nevados de	11966	-320	138999	Ash
357070	Chillan, Nevados de	11966	-320	139000	Pyroclastic flow
357070	Chillan, Nevados de	11967	1650	139001	Explosion
357070	Chillan, Nevados de	11968	1749	139003	Explosion
357070	Chillan, Nevados de	11968	1749	139004	Ash
357070	Chillan, Nevados de	11969	1752	139006	Explosion	Uncertain
357070	Chillan, Nevados de	11970	1860	139008	Explosion	Uncertain
357070	Chillan, Nevados de	11971	1861	139010	Explosion
357070	Chillan, Nevados de	11971	1861	139011	Ash
357070	Chillan, Nevados de	11971	1861	139012	Bombs
357070	Chillan, Nevados de	11971	1861	139013	Lava flow(s)
357070	Chillan, Nevados de	11971	1861	139014	Lahar or mudflow
357070	Chillan, Nevados de	11971	1861	139015	Lava fountains	weak or small
357070	Chillan, Nevados de	11971	1861	139016	Earthquakes (undefined)	Before.
357070	Chillan, Nevados de	11972	1864	139018	Explosion
357070	Chillan, Nevados de	11972	1864	139019	Ash
357070	Chillan, Nevados de	11972	1864	139020	Lava flow(s)
357070	Chillan, Nevados de	11972	1864	139021	Lahar or mudflow
357070	Chillan, Nevados de	11972	1864	139022	Cinder cone formation
357070	Chillan, Nevados de	11972	1864	139023	Earthquakes (undefined)
357070	Chillan, Nevados de	11973	1872	139024	Explosion
357070	Chillan, Nevados de	11973	1872	139025	Ash
357070	Chillan, Nevados de	11974	1877	139026	Explosion
357070	Chillan, Nevados de	11974	1877	139027	Ash
357070	Chillan, Nevados de	11986	1935	139029	Explosion	Uncertain
357070	Chillan, Nevados de	11986	1935	139030	Lava flow(s)
357070	Chillan, Nevados de	11986	1935	139031	Lahar or mudflow
357070	Chillan, Nevados de	11986	1935	139032	Earthquakes (undefined)
357070	Chillan, Nevados de	11987	1945	139034	Explosion	Uncertain
357070	Chillan, Nevados de	11988	1946	139036	Explosion
357070	Chillan, Nevados de	11989	1965	139038	Explosion	Uncertain
357070	Chillan, Nevados de	11991	1973	139041	Explosion
357070	Chillan, Nevados de	11991	1973	139042	Pyroclastic flow	weak or small
357070	Chillan, Nevados de	11991	1973	139043	Lava flow(s)	moderate
357070	Chillan, Nevados de	11991	1973	139044	Lava dome formation	moderate
357070	Chillan, Nevados de	11991	1973	139045	Blocks
357070	Chillan, Nevados de	11992	2003	139048	Explosion
357070	Chillan, Nevados de	11992	2003	139049	Ash
357070	Chillan, Nevados de	11992	2003	139050	Phreatic activity
357070	Chillan, Nevados de	11993	2009	139051	Explosion	Uncertain
357070	Chillan, Nevados de	11993	2009	139052	Ash	Uncertain
357080	Antuco	11994	-7750	139054	Phreatic activity
357080	Antuco	11994	-7750	139055	Edifice destroyed	Collapse/avalanche
357080	Antuco	11994	-7750	139056	Debris avalanches
357080	Antuco	11995	1750	139057	Explosion
357080	Antuco	11996	1752	139059	Explosion
357080	Antuco	11996	1752	139060	Ash
357090	Copahue	12008	1992	139061	Volcanic tremor
357090	Copahue	12008	1992	139062	Earthquakes (undefined)
357090	Copahue	12009	1994	139065	Explosion
357090	Copahue	12009	1994	139066	Ash
357090	Copahue	12009	1994	139067	Blocks
357090	Copahue	12010	1995	139070	Ash
357090	Copahue	12010	1995	139071	Phreatic activity
357090	Copahue	12010	1995	139072	Blocks
357090	Copahue	12011	2000	139075	Explosion
357090	Copahue	12011	2000	139076	Ash
357090	Copahue	12011	2000	139077	Lapilli
357090	Copahue	12011	2000	139078	Bombs
357090	Copahue	12011	2000	139079	Scoria
357090	Copahue	12011	2000	139080	Pyroclastic flow	weak or small
357090	Copahue	12011	2000	139081	Phreatic activity
357090	Copahue	12011	2000	139082	Property damage
357090	Copahue	12011	2000	139083	Lahar or mudflow
357090	Copahue	12011	2000	139084	Evacuations
357090	Copahue	12011	2000	139085	Earthquakes (undefined)
357090	Copahue	12011	2000	139086	Glow
357090	Copahue	12011	2000	139087	Fauna kill	Aquatic.
357100	Lonquimay	12012	1853	139089	Explosion
357100	Lonquimay	12012	1853	139090	Tephra
357100	Lonquimay	12012	1853	139091	Lava flow(s)
357100	Lonquimay	12013	1887	139093	Explosion
357110	Llaima	12020	-7410	139094	Explosion
357110	Llaima	12021	-6880	139095	Explosion
357110	Llaima	12021	-6880	139096	Pumice
357110	Llaima	12022	-5290	139097	Explosion
357110	Llaima	12022	-5290	139098	Pyroclastic flow
357110	Llaima	12023	1640	139099	Explosion
357110	Llaima	12023	1640	139100	Ash
357110	Llaima	12023	1640	139101	Lava flow(s)	Uncertain
357110	Llaima	12023	1640	139102	Lahar or mudflow
357110	Llaima	12023	1640	139103	Debris avalanches
357110	Llaima	12023	1640	139104	Eruption cloud
357110	Llaima	12024	1751	139106	Explosion
357110	Llaima	12024	1751	139107	Tephra
357110	Llaima	12024	1751	139108	Lava flow(s)
357110	Llaima	12025	1759	139109	Explosion
357110	Llaima	12025	1759	139110	Tephra
357110	Llaima	12026	1822	139111	Explosion
357110	Llaima	12026	1822	139112	Tephra
357110	Llaima	12027	1852	139114	Explosion
357110	Llaima	12027	1852	139115	Tephra
357110	Llaima	12028	1862	139117	Explosion
357110	Llaima	12028	1862	139118	Tephra
357110	Llaima	12028	1862	139119	Eruption cloud
357110	Llaima	12029	1864	139121	Explosion
357110	Llaima	12029	1864	139122	Tephra
357110	Llaima	12029	1864	139123	Eruption cloud
357110	Llaima	12030	1866	139125	Explosion
357110	Llaima	12030	1866	139126	Tephra
357110	Llaima	12041	1895	139127	Explosion
357110	Llaima	12041	1895	139128	Tephra
357110	Llaima	12041	1895	139129	Lava flow(s)
357110	Llaima	12041	1895	139130	Lahar or mudflow
357110	Llaima	12042	1903	139133	Explosion
357110	Llaima	12042	1903	139134	Lava flow(s)
357110	Llaima	12043	1907	139135	Explosion
357110	Llaima	12043	1907	139136	Tephra
357110	Llaima	12043	1907	139137	Lava flow(s)
357110	Llaima	12044	1912	139139	Explosion
357110	Llaima	12044	1912	139140	Tephra
357110	Llaima	12044	1912	139141	Lava flow(s)
357110	Llaima	12045	1914	139142	Explosion
357110	Llaima	12045	1914	139143	Tephra
357110	Llaima	12045	1914	139144	Lava flow(s)
357110	Llaima	12046	1917	139146	Explosion
357110	Llaima	12046	1917	139147	Tephra
357110	Llaima	12047	1922	139148	Explosion
357110	Llaima	12047	1922	139149	Tephra
357110	Llaima	12047	1922	139150	Earthquakes (undefined)
357110	Llaima	12048	1927	139154	Explosion
357110	Llaima	12048	1927	139155	Ash
357110	Llaima	12048	1927	139156	Lapilli
357110	Llaima	12048	1927	139157	Scoria
357110	Llaima	12048	1927	139158	Lava flow(s)
357110	Llaima	12048	1927	139159	Lahar or mudflow
357110	Llaima	12056	1942	139160	Explosion
357110	Llaima	12056	1942	139161	Tephra
357110	Llaima	12056	1942	139162	Loud audible noises
357110	Llaima	12057	1944	139163	Explosion
357110	Llaima	12057	1944	139164	Tephra
357110	Llaima	12057	1944	139165	Loud audible noises	Uncertain
357110	Llaima	12057	1944	139166	Earthquakes (undefined)	Uncertain
357110	Llaima	12058	1945	139167	Explosion
357110	Llaima	12058	1945	139168	Tephra
357110	Llaima	12058	1945	139169	Pyroclastic flow	Uncertain
357110	Llaima	12058	1945	139170	Lava flow(s)
357110	Llaima	12058	1945	139171	Lahar or mudflow
357110	Llaima	12058	1945	139172	Loud audible noises
357110	Llaima	12058	1945	139173	Earthquakes (undefined)
357110	Llaima	12059	1946	139174	Explosion
357110	Llaima	12059	1946	139175	Tephra
357110	Llaima	12059	1946	139176	Lava flow(s)
357110	Llaima	12059	1946	139177	Lahar or mudflow
357110	Llaima	12059	1946	139178	Debris avalanches
357110	Llaima	12060	1949	139180	Explosion
357110	Llaima	12060	1949	139181	Tephra
357110	Llaima	12060	1949	139182	Lava flow(s)
357110	Llaima	12061	1955	139185	Explosion
357110	Llaima	12061	1955	139186	Ash
357110	Llaima	12061	1955	139187	Lava flow(s)
357110	Llaima	12061	1955	139188	Property damage
357110	Llaima	12061	1955	139189	Lahar or mudflow
357110	Llaima	12061	1955	139190	Earthquakes (undefined)
357110	Llaima	12063	1964	139192	Explosion
357110	Llaima	12069	1994	139193	Lahar or mudflow
357110	Llaima	12069	1994	139194	Evacuations
357110	Llaima	12069	1994	139195	Volcanic tremor
357110	Llaima	12069	1994	139196	Earthquakes (undefined)	Before.
357110	Llaima	12069	1994	139197	Earthquakes (undefined)	After.
357110	Llaima	12070	1995	139199	Explosion
357110	Llaima	12070	1995	139200	Ash
357110	Llaima	12070	1995	139201	Loud audible noises
357110	Llaima	12070	1995	139202	Volcanic tremor
357110	Llaima	12070	1995	139203	Earthquakes (undefined)	Before.
357110	Llaima	12071	1997	139205	Phreatic activity	weak or small
357110	Llaima	12071	1997	139206	Earthquakes (undefined)	Before.
357110	Llaima	12072	1998	139208	Explosion
357110	Llaima	12072	1998	139209	Ash
357110	Llaima	12072	1998	139210	Earthquakes (undefined)	Before.
357110	Llaima	12072	1998	139211	Earthquakes (undefined)
357110	Llaima	12073	1998	139213	Explosion
357110	Llaima	12073	1998	139214	Ash
357110	Llaima	12074	2002	139216	Explosion
357110	Llaima	12074	2002	139217	Ash	weak or small
357110	Llaima	12075	2003	139219	Explosion
357110	Llaima	12075	2003	139220	Ash
357110	Llaima	12075	2003	139221	Earthquakes (undefined)
357110	Llaima	12076	2007	139223	Explosion
357110	Llaima	12076	2007	139224	Ash
357122	Lanin	12084	90	139226	Lava flow(s)
357122	Lanin	12085	400	139228	Explosion
357122	Lanin	12085	400	139229	Pyroclastic flow
357122	Lanin	12086	560	139231	Explosion
357122	Lanin	12086	560	139232	Pyroclastic flow
357123	Huanquihue Group	12087	1750	139234	Explosion
357123	Huanquihue Group	12087	1750	139235	Ash
357123	Huanquihue Group	12087	1750	139236	Lava flow(s)
357123	Huanquihue Group	12087	1750	139237	Cinder cone formation
357120	Villarrica	12088	-7520	139238	Lava flow(s)
357120	Villarrica	12089	-6690	139239	Explosion
357120	Villarrica	12089	-6690	139240	Pyroclastic flow
357120	Villarrica	12090	-3730	139241	Explosion
357120	Villarrica	12090	-3730	139242	Pyroclastic flow
357120	Villarrica	12091	-2990	139243	Lava flow(s)
357120	Villarrica	12092	-2240	139244	Explosion
357120	Villarrica	12092	-2240	139245	Scoria
357120	Villarrica	12092	-2240	139246	Pyroclastic flow
357120	Villarrica	12093	-2140	139247	Explosion
357120	Villarrica	12093	-2140	139248	Pyroclastic flow
357120	Villarrica	12094	-1980	139249	Lava flow(s)
357120	Villarrica	12095	-1810	139251	Explosion
357120	Villarrica	12095	-1810	139252	Pyroclastic flow
357120	Villarrica	12095	-1810	139253	Caldera formation	Explosion
357120	Villarrica	12096	-1080	139254	Explosion
357120	Villarrica	12096	-1080	139255	Bombs
357120	Villarrica	12096	-1080	139256	Pyroclastic flow
357120	Villarrica	12097	-670	139257	Explosion
357120	Villarrica	12097	-670	139258	Scoria
357120	Villarrica	12106	1657	139259	Explosion
357120	Villarrica	12107	1688	139261	Explosion
357120	Villarrica	12107	1688	139262	Ash
357120	Villarrica	12107	1688	139263	Lahar or mudflow	Uncertain
357120	Villarrica	12108	1716	139265	Explosion
357120	Villarrica	12108	1716	139266	Tephra
357120	Villarrica	12109	1730	139268	Explosion
357120	Villarrica	12110	1737	139270	Explosion
357120	Villarrica	12111	1742	139272	Explosion
357120	Villarrica	12111	1742	139273	Ash
357120	Villarrica	12112	1745	139275	Explosion
357120	Villarrica	12113	1751	139277	Explosion
357120	Villarrica	12113	1751	139278	Ash
357120	Villarrica	12113	1751	139279	Lava flow(s)	Uncertain
357120	Villarrica	12114	1759	139281	Explosion
357120	Villarrica	12114	1759	139282	Ash
357120	Villarrica	12115	1775	139284	Explosion	Uncertain
357120	Villarrica	12115	1775	139285	Tephra	Uncertain
357120	Villarrica	12115	1775	139286	Lava flow(s)	Uncertain
357120	Villarrica	12115	1775	139287	Lahar or mudflow	Uncertain
357120	Villarrica	12116	1777	139289	Explosion
357120	Villarrica	12116	1777	139290	Ash
357120	Villarrica	12126	1853	139292	Ash
357120	Villarrica	12126	1853	139293	Lava flow(s)	Uncertain
357120	Villarrica	12126	1853	139294	Loud audible noises
357120	Villarrica	12126	1853	139295	Earthquakes (undefined)
357120	Villarrica	12127	1859	139297	Explosion
357120	Villarrica	12127	1859	139298	Ash
357120	Villarrica	12128	1864	139300	Explosion
357120	Villarrica	12128	1864	139301	Ash
357120	Villarrica	12130	1869	139304	Explosion
357120	Villarrica	12130	1869	139305	Flames
357120	Villarrica	12130	1869	139306	Loud audible noises
357120	Villarrica	12130	1869	139307	Earthquakes (undefined)
357120	Villarrica	12131	1874	139309	Explosion
357120	Villarrica	12131	1874	139310	Tephra
357120	Villarrica	12131	1874	139311	Lava flow(s)	Uncertain
357120	Villarrica	12132	1875	139313	Explosion
357120	Villarrica	12132	1875	139314	Ash
357120	Villarrica	12132	1875	139315	Lapilli
357120	Villarrica	12132	1875	139316	Phreatomagmatic eruption
357120	Villarrica	12133	1877	139318	Explosion
357120	Villarrica	12133	1877	139319	Tephra
357120	Villarrica	12134	1879	139321	Explosion
357120	Villarrica	12134	1879	139322	Ash
357120	Villarrica	12135	1883	139324	Explosion
357120	Villarrica	12144	1915	139326	Explosion
357120	Villarrica	12144	1915	139327	Ash
357120	Villarrica	12146	1920	139330	Explosion
357120	Villarrica	12146	1920	139331	Ash
357120	Villarrica	12146	1920	139332	Lava flow(s)
357120	Villarrica	12146	1920	139333	Lahar or mudflow
357120	Villarrica	12146	1920	139334	Loud audible noises
357120	Villarrica	12146	1920	139335	Earthquakes (undefined)
357120	Villarrica	12147	1921	139337	Explosion	Uncertain
357120	Villarrica	12147	1921	139338	Ash	Uncertain
357120	Villarrica	12147	1921	139339	Lava flow(s)	Uncertain
357120	Villarrica	12148	1922	139341	Explosion
357120	Villarrica	12148	1922	139342	Tephra
357120	Villarrica	12148	1922	139343	Loud audible noises
357120	Villarrica	12148	1922	139344	Earthquakes (undefined)
357120	Villarrica	12149	1927	139346	Explosion
357120	Villarrica	12149	1927	139347	Tephra
357120	Villarrica	12150	1929	139349	Explosion
357120	Villarrica	12150	1929	139350	Ash
357120	Villarrica	12151	1933	139352	Explosion
357120	Villarrica	12151	1933	139353	Tephra
357120	Villarrica	12152	1935	139355	Explosion
357120	Villarrica	12152	1935	139356	Tephra
357120	Villarrica	12162	1961	139358	Earthquakes (undefined)
357120	Villarrica	12163	1963	139361	Explosion
357120	Villarrica	12163	1963	139362	Ash
357120	Villarrica	12163	1963	139363	Lapilli
357120	Villarrica	12163	1963	139364	Lava flow(s)
357120	Villarrica	12163	1963	139365	Property damage
357120	Villarrica	12163	1963	139366	Fatalities			1963		5	>	21
357120	Villarrica	12163	1963	139367	Lahar or mudflow
357120	Villarrica	12163	1963	139368	Loud audible noises
357120	Villarrica	12163	1963	139369	Earthquakes (undefined)
357120	Villarrica	12164	1964	139371	Explosion	moderate
357120	Villarrica	12164	1964	139372	Ash
357120	Villarrica	12164	1964	139373	Lapilli
357120	Villarrica	12164	1964	139374	Scoria
357120	Villarrica	12164	1964	139375	Lava flow(s)	weak or small
357120	Villarrica	12164	1964	139376	Property damage
357120	Villarrica	12164	1964	139377	Fatalities			1964		3		3
357120	Villarrica	12164	1964	139378	Lahar or mudflow
357120	Villarrica	12164	1964	139379	Debris avalanches
357120	Villarrica	12164	1964	139380	Loud audible noises
357120	Villarrica	12164	1964	139381	Earthquakes (undefined)
357120	Villarrica	12165	1971	139385	Explosion
357120	Villarrica	12165	1971	139386	Ash
357120	Villarrica	12165	1971	139387	Bombs
357120	Villarrica	12165	1971	139388	Lava flow(s)
357120	Villarrica	12165	1971	139389	Property damage
357120	Villarrica	12165	1971	139390	Fatalities			1971		11
357120	Villarrica	12171	1992	139391	Ash
357120	Villarrica	12171	1992	139392	Phreatic activity
357120	Villarrica	12171	1992	139393	Cinder cone formation
357120	Villarrica	12171	1992	139394	Volcanic tremor
357120	Villarrica	12171	1992	139395	Earthquakes (undefined)
357120	Villarrica	12172	1994	139397	Explosion
357120	Villarrica	12172	1994	139398	Ash	weak or small
357120	Villarrica	12172	1994	139399	Volcanic tremor
357120	Villarrica	12173	1995	139401	Explosion
357120	Villarrica	12173	1995	139402	Ash	weak or small
357120	Villarrica	12173	1995	139403	Cinder cone formation
357120	Villarrica	12173	1995	139404	Volcanic tremor
357120	Villarrica	12174	1996	139406	Explosion
357120	Villarrica	12174	1996	139407	Lava lake
358040	Michinmahuida	12177	1834	139410	Explosion
358040	Michinmahuida	12177	1834	139411	Tephra
358040	Michinmahuida	12177	1834	139412	Lava flow(s)	Uncertain
358040	Michinmahuida	12177	1834	139413	Lahar or mudflow
357120	Villarrica	12178	1996	139415	Explosion
357120	Villarrica	12178	1996	139416	Ash
357120	Villarrica	12178	1996	139417	Bombs
357120	Villarrica	12178	1996	139418	Lava lake
357120	Villarrica	12178	1996	139419	Lava fountains
357120	Villarrica	12178	1996	139420	Earthquakes (undefined)	Before.
357120	Villarrica	12178	1996	139421	Earthquakes (undefined)
357120	Villarrica	12178	1996	139422	Blocks
357130	Mocho-Choshuenco	12185	1864	139424	Directed explosion
357130	Mocho-Choshuenco	12186	1937	139425	Explosion	Uncertain
357130	Mocho-Choshuenco	12186	1937	139426	Lahar or mudflow	Uncertain
357140	Carran-Los Venados	12187	1907	139428	Explosion
357140	Carran-Los Venados	12187	1907	139429	Ash
357140	Carran-Los Venados	12187	1907	139430	Lapilli
357140	Carran-Los Venados	12187	1907	139431	Lava flow(s)
357140	Carran-Los Venados	12187	1907	139432	Lava dome formation
357140	Carran-Los Venados	12187	1907	139433	Property damage
357140	Carran-Los Venados	12187	1907	139434	Lahar or mudflow
357140	Carran-Los Venados	12187	1907	139435	Cinder cone formation
357140	Carran-Los Venados	12187	1907	139436	Earthquakes (undefined)	Before.
357140	Carran-Los Venados	12188	1955	139438	Explosion
357140	Carran-Los Venados	12188	1955	139439	Ash
357140	Carran-Los Venados	12188	1955	139440	Lapilli
357140	Carran-Los Venados	12188	1955	139441	Bombs
357140	Carran-Los Venados	12188	1955	139442	Property damage
357140	Carran-Los Venados	12188	1955	139443	Fatalities			1955		7	?	27
357140	Carran-Los Venados	12188	1955	139444	Evacuations
357140	Carran-Los Venados	12188	1955	139445	Eruption cloud
357140	Carran-Los Venados	12188	1955	139446	Earthquakes (undefined)	Before.
357140	Carran-Los Venados	12188	1955	139447	Earthquakes (undefined)
357140	Carran-Los Venados	12188	1955	139448	Pumice
357140	Carran-Los Venados	12188	1955	139449	Blocks
357140	Carran-Los Venados	12189	1979	139451	Explosion
357140	Carran-Los Venados	12189	1979	139452	Ash
357140	Carran-Los Venados	12189	1979	139453	Bombs
357140	Carran-Los Venados	12189	1979	139454	Scoria
357140	Carran-Los Venados	12189	1979	139455	Lava flow(s)
357140	Carran-Los Venados	12189	1979	139456	Evacuations
357150	Puyehue-Cordon Caulle	12200	-490	139457	Pyroclastic flow
357150	Puyehue-Cordon Caulle	12200	-490	139458	Pumice
357150	Puyehue-Cordon Caulle	12201	110	139459	Explosion
357150	Puyehue-Cordon Caulle	12201	110	139460	Pyroclastic flow
357150	Puyehue-Cordon Caulle	12202	140	139462	Explosion
357150	Puyehue-Cordon Caulle	12203	500	139463	Explosion
357150	Puyehue-Cordon Caulle	12203	500	139464	Pyroclastic flow
357150	Puyehue-Cordon Caulle	12203	500	139465	Pumice
357150	Puyehue-Cordon Caulle	12204	860	139467	Explosion
357150	Puyehue-Cordon Caulle	12204	860	139468	Lapilli
357150	Puyehue-Cordon Caulle	12204	860	139469	Pumice
357150	Puyehue-Cordon Caulle	12205	1140	139470	Explosion
357150	Puyehue-Cordon Caulle	12205	1140	139471	Pyroclastic flow
357150	Puyehue-Cordon Caulle	12205	1140	139472	Pumice
357150	Puyehue-Cordon Caulle	12206	1220	139473	Explosion
357150	Puyehue-Cordon Caulle	12206	1220	139474	Pyroclastic flow
357150	Puyehue-Cordon Caulle	12206	1220	139475	Pumice
357150	Puyehue-Cordon Caulle	12207	1759	139477	Explosion
357150	Puyehue-Cordon Caulle	12207	1759	139478	Pyroclastic flow
357150	Puyehue-Cordon Caulle	12208	1893	139480	Explosion
357150	Puyehue-Cordon Caulle	12208	1893	139481	Pyroclastic flow
357150	Puyehue-Cordon Caulle	12209	1905	139483	Explosion
357150	Puyehue-Cordon Caulle	12210	1914	139485	Explosion
357150	Puyehue-Cordon Caulle	12211	1919	139487	Explosion
357150	Puyehue-Cordon Caulle	12212	1921	139489	Explosion	violent, strong, or large
358010	Osorno	12220	-1710	139490	Scoria
358010	Osorno	12220	-1710	139491	Pyroclastic flow
358010	Osorno	12220	-1710	139492	Pumice
358010	Osorno	12221	-210	139493	Explosion
358010	Osorno	12221	-210	139494	Ash
358010	Osorno	12221	-210	139495	Pyroclastic flow
358010	Osorno	12221	-210	139496	Pumice
358010	Osorno	12222	420	139497	Explosion
358010	Osorno	12222	420	139498	Ash
358010	Osorno	12222	420	139499	Pyroclastic flow
358010	Osorno	12222	420	139500	Pumice
358010	Osorno	12223	910	139501	Explosion
358010	Osorno	12223	910	139502	Ash
358010	Osorno	12223	910	139503	Scoria
358010	Osorno	12223	910	139504	Pyroclastic flow
358010	Osorno	12224	1220	139505	Explosion
358010	Osorno	12224	1220	139506	Ash
358010	Osorno	12224	1220	139507	Scoria
358010	Osorno	12224	1220	139508	Pyroclastic flow
358010	Osorno	12224	1220	139509	Pumice
358010	Osorno	12225	1310	139510	Explosion
358010	Osorno	12225	1310	139511	Ash
358010	Osorno	12225	1310	139512	Scoria
358010	Osorno	12225	1310	139513	Pyroclastic flow
358010	Osorno	12225	1310	139514	Pumice
358010	Osorno	12226	1575	139515	Explosion	Uncertain
358010	Osorno	12226	1575	139516	Flames
358010	Osorno	12227	1640	139517	Explosion	Uncertain
358010	Osorno	12227	1640	139518	Flames
358010	Osorno	12228	1644	139519	Explosion	Uncertain
358010	Osorno	12228	1644	139520	Flames
358020	Calbuco	12241	-4300	139523	Pyroclastic flow
358020	Calbuco	12241	-4300	139524	Pumice
358020	Calbuco	12242	-1920	139526	Explosion
358020	Calbuco	12242	-1920	139527	Ash
358020	Calbuco	12242	-1920	139528	Pyroclastic flow
358020	Calbuco	12242	-1920	139529	Pumice
358020	Calbuco	12243	-330	139531	Explosion
358020	Calbuco	12243	-330	139532	Ash
358020	Calbuco	12243	-330	139533	Pyroclastic flow
358020	Calbuco	12243	-330	139534	Pumice
358020	Calbuco	12244	-100	139536	Explosion
358020	Calbuco	12244	-100	139537	Ash
358020	Calbuco	12244	-100	139538	Bombs
358020	Calbuco	12244	-100	139539	Pyroclastic flow
358020	Calbuco	12244	-100	139540	Pumice
358020	Calbuco	12245	40	139542	Explosion
358020	Calbuco	12245	40	139543	Ash
358020	Calbuco	12245	40	139544	Pyroclastic flow
358020	Calbuco	12245	40	139545	Pumice
358020	Calbuco	12246	220	139547	Explosion
358020	Calbuco	12246	220	139548	Ash
358020	Calbuco	12246	220	139549	Pyroclastic flow
358020	Calbuco	12246	220	139550	Pumice
358020	Calbuco	12247	520	139552	Explosion
358020	Calbuco	12247	520	139553	Ash
358020	Calbuco	12247	520	139554	Pyroclastic flow
358020	Calbuco	12257	1911	139556	Phreatomagmatic eruption
[truncated: 39,731 more rows]

## Sheet: References
Global Volcanism Program - Volcanoes of the World 4.9.4				Downloaded on 13 May 2021 at 06:57 PM
Volcano Number	Volcano Name	Author	Publication Year	Title	Source
210010	West Eifel Volcanic Field	Buchel G, Lorenz V	1982	Zum Alter des Maarvulkanismus der Westeifel	Neues Jahrb Geol Palaont Abh, 163: 1-22
210010	West Eifel Volcanic Field	Keyser M, Ritter J R R, Jordan M	2002	3D shear-wave velocity structure of the Eifel plume, Germany	Earth Planet Sci Lett, 203: 59-82
210010	West Eifel Volcanic Field	Krafft M	1974	Guide des Volcans d'Europe	Neuchatel: Delachaux & Niestle, 412 p
210010	West Eifel Volcanic Field	Mertes H, Schmincke H-U	1983	Age distribution of volcanoes in the West-Eifel	Neues Jahrb Geol Palaont Monatsh, 166: 260-293
210010	West Eifel Volcanic Field	Ritter J R R, Jordan M, Christensen U R, Achauer U	2000	A mantle plume below the Eifel volcanic fields, Germany	Earth Planet Sci Lett, 186: 7-14
210010	West Eifel Volcanic Field	Rutten M G	1969	The Geology of Western Europe	Amsterdam: Elsevier, 520 p
210010	West Eifel Volcanic Field	Shaw C S J	2004	The temporal evolution of three magmatic systems in the West Eifel volcanic field, Germany	J. Volcanol. Geotherm. Res., 131: 213-240
210010	West Eifel Volcanic Field	Shaw C S J, Woodland A B, Hopp J, Trenholm N D	2010	Structure and evolution of the Rockeskyllerkopf Volcanic Complex, West Eifel Volcanic Field, Germany	Bull Volcanol, 72: 971-990
210010	West Eifel Volcanic Field	Shaw, C S J, and Woodland, A B	2012	The role of magma mixing in the petrogenesis of mafic alkaline lavas, Rockeskyllerkopf Volcanic Complex, West Eifel, Germany	Bull Volcanol, 74: 359-376
210010	West Eifel Volcanic Field	Zolitschka B, Negendank J F W, Lottermoser B G	1995	Sedimentological proof and dating of the early Holocene volcanic eruption of Ulmener Maar (Vulkaneifel, Germany)	Geol Rundschau, 84: 213-219
210020	Chaine des Puys	Brousse R	1973	Le volcanisme Quaternaire en France-chronologie des differentes phase eruptives de la Chaine des Puys au Quaternaire recent	Internatl Quat Assoc (INQUA) Cong, 9: 105-109
210020	Chaine des Puys	Geunet P	1986	Datation par l'analyse pollinique de l'explosion des volcans du groupe Pavin (Besse-en-Chandesse, Puy-de-Dome, France)	11 Reun Ann Sci Terre, Clermont-Ferrand, Ed Soc Geol France, p 85
210020	Chaine des Puys	Guerin G	1989	La thermoluminescence des plagioclases, methode de datation du volcanisme. Application au domaine volcanique Francais: Chaine des Puys, Monts-Dore, Cezallier, Bas-Vivarais	Unpublished PhD thesis, Univ Pierre et Marie Curie, 253 p
210020	Chaine des Puys	Hetier J M, Guillet B, Brousse R, Delibrias G, Maury R C	1983	14-C dating of buried soils in the volcanic Chaine des Puys (France)	Bull Volcanol, 46: 193-202
210020	Chaine des Puys	Juvigne E, Bastin B, Beaulieu J L de, Etlicher M, Gewelt M, Gilot E, Goeury C, Janssen C R, Milcamps V, Van Leeuwen J	1990	Tephrostratigraphy of the late glacial and the Holocene of the French Massif Central based on investigations in peat-bogs	IAVCEI 1990 Internatl Volc Cong, Mainz, Abs, (unpaginated)
210020	Chaine des Puys	Krafft M	1974	Guide des Volcans d'Europe	Neuchatel: Delachaux & Niestle, 412 p
210020	Chaine des Puys	Pelletier H, Delibrias G, Labeyrie J, Perquis M T, Rudel A	1959	Mesure de l'age d'une des coulees volcaniques issues du Puy de la Vache (Puy de Dome) par la methode du carbone 14	CR Acad Sci Paris, Series-D, 214: 2221
210020	Chaine des Puys	Rutten M G	1969	The Geology of Western Europe	Amsterdam: Elsevier, 520 p
210020	Chaine des Puys	de Goer A, Boivin P, Camus G, Gourgaud A, Kieffer G, Mergoil J, Vincent P M	1991	Volcanologie de la Chaine des Puys	Paris: Inst Geog Natl, 127 p and 1:25,000 geol map
210040	Calatrava Volcanic Field	Gonzalez Cardenas E, Gosalvez Rey R U, Escobar Lahoz E, Becerra Ramirez R	2007	Condiciones medioambientales en el Holoceno medio del Campo de Calatrava (Ciudad Real, Espana): resultados preliminares	Actas Cong Nac Biogeogr, in press
210040	Calatrava Volcanic Field	IAVCEI	1973-80	Post-Miocene Volcanoes of the World	IAVCEI Data Sheets, Rome: Internatl Assoc Volc Chemistry Earth's Interior
210040	Calatrava Volcanic Field	Lopez-Ruiz J, Maria Cebria J, Doblas M	2002	Cenozoic volcanism I: the Iberian peninsula	In: Gibbons W, Moreno T (eds) {The Geology of Spain}, Geol Soc London, 649 p
211003	Vulsini	Barberi F, Innocenti F, Landi P, Rossi U, Saitta M, Santacroce R, Villa I M	1984	The evolution of Latera caldera (Central Italy) in the light of subsurface data	Bull Volcanol, 47: 125-143
211003	Vulsini	Capaccioni B, Nappi G, Renzulli A	1994	Stratigraphy, eruptive mechanisms and depositional processes of the Pitigliano Formation (Latera volcanic complex), Vulsini District, Italy	Acta Vulc, 5: 31-39
211003	Vulsini	IAVCEI	1973-80	Post-Miocene Volcanoes of the World	IAVCEI Data Sheets, Rome: Internatl Assoc Volc Chemistry Earth's Interior
211003	Vulsini	Nappi G, Capaccioni B, Mattioli M, Mancini E, Valentini L	1994	Plinian fall deposits from Vulsini District (Central Italy)	Bull Volcanol, 56: 502-515
211003	Vulsini	Palladino D M, Agosta E	1997	Pumice fall deposits of the western Vulsini volcanoes (central Italy)	J. Volcanol. Geotherm. Res., 78: 77-102
211003	Vulsini	Palladino D M, Simei S	2002	Three types of pyroclastic currents and their deposits: examples from the Vulsini Volcanoes, Italy	J. Volcanol. Geotherm. Res., 116: 97-118
211003	Vulsini	Palladino D M, Simei S	2005	Eruptive dynamics and caldera collapse during the Onano eruption, Vulsini, Italy	Bull Volcanol, 67: 423-440
211003	Vulsini	Palladino D M, Valentine G A	1995	Coarse-tail vertical and lateral grading in pyroclastic flow deposits of the Latera volcanic complex (Vulsini, central Italy): origin and implications for flow dynamics	J. Volcanol. Geotherm. Res., 69: 343-364
211003	Vulsini	Sparks R S J	1975	Stratigraphy and geology of the ignimbrites of Vulsini volcano, central Italy	Geol Rundschau, 64: 497-523
211003	Vulsini	Stothers R B, Rampino M R	1983	Volcanic eruptions in the Mediterranean before AD 630 from written and archaeological sources	J. Geophys. Res, 88: 6357-6371
211003	Vulsini	Varekamp J C	1980	The geology of the Vulsinian area, Lazio, Italy	Bull Volcanol, 43: 487-504
211004	Colli Albani	Amato A, Chiarabba C, Cocco M, di Bona M, Selvaggi G	1994	The 1989-1990 seismic swarm in the Alban Hills volcanic area, central Italy	J. Volcanol. Geotherm. Res., 61: 225-237
211004	Colli Albani	Anzidei M, Baldi P, Casula G, Galvani A, Riguzzi F, Zanutta A	1998	Evidence of active crustal deformation of the Colli Albani volcanic area (central Italy) by GPS surveys	J. Volcanol. Geotherm. Res., 80: 55-65
211004	Colli Albani	Anzidei M, Carapezza M L, Esposito A, Giordano G, Lelli M, Tarchini L	2008	The Albano Maar Lake high resolution bathymetry and dissolved CO budget (Colli Albani volcano, Italy): constraints to hazard evaluation	J. Volcanol. Geotherm. Res., 171: 258-268
211004	Colli Albani	Blanc A C	1953	Excursion au Mont Circe	Internatl Quat Assoc (INQUA) Guidebook, p 5-19
211004	Colli Albani	Boari E, Avanzinelli R, Melluso L, Giordano G, Mattei M, De Benedetti A A, Morra V, Conticelli S	2009	Isotope geochemistry (Sr-Nd-Pb) and petrogenesis of leucite-bearing volcanic rocks from "Colli Albani" volcano, Roman Magmatic Province, Central Italy: inferences on volcano evolution and magma genesis	Bull Volcanol, 71: 977-1005
211004	Colli Albani	Chiarabba C, Amato A, Delaney P T	1997	Crustal structure, evolution, and volcanic unrest of the Alban Hills, central Italy	Bull Volcanol, 59: 161-170
211004	Colli Albani	De Benedetti A A, Funiciello R, Giodano G, Diano G, Caprilli E, Paterne M	2008	Volcanology, history and myths of the Lake Albano maar (Colli Albani volcano, Italy)	J. Volcanol. Geotherm. Res., 176: 387-406
211004	Colli Albani	De Rita D, Funiciello R, Rosa C	1991	Volcanic activity and drainage network evolution of the Alban Hills area (Rome, Italy)	Acta Vulc, 2: 185-198
211004	Colli Albani	De Rita D, Giordano G, Esposito A, Fabbri M, Rodani S	2002	Large volume phreatomagmatic ignimbrites from the Colli Albani volcano (Middle Pleistocene, Italy)	J. Volcanol. Geotherm. Res., 118: 77-98
211004	Colli Albani	Freda C, Gaeta M, Karner D B, Marra F, Renne P R, Taddeucci J, Scarlato P, Christensen J N, Dallai L	2006	Eruptive history and petrologic evolution of the Albano multiple maar (Alban Hills, Central Italy)	Bull Volcanol, 68: 567-591
211004	Colli Albani	Freda C, Gaeta M, Palladino D M, Trigila R	1997	The Villa Senni eruption (Alban Hills, central Italy: the role of H20 and CO2 on the magma chamber evolution and on the eruptive scenario	J. Volcanol. Geotherm. Res., 78: 103-120
211004	Colli Albani	Funiciello R, Giodano G, De Rita D	2003	The Albano maar lake (Colli Albani volcano, Italy): recent volcanic activity and evidence of pre-Roman age catastrophic lahar events	J. Volcanol. Geotherm. Res., 123: 43-61
211004	Colli Albani	Giaccio B, Marra F, Hajdas I, Karner D B, Renne P R, Sposato A	2009	40Ar/39Ar and 14C geochronology of the Albano maar deposits: implications for defining the age and eruptive style of the most recent explosive activity at Colli Albani volcanic district, Central Italy	J. Volcanol. Geotherm. Res., 185: 203-213
211004	Colli Albani	Giordano G, De Benedetti A A, Diana A, Diano G, Gaudioso F, Marasco F, Miceli M, Mollo S, Cas R A F, Funiciello R	2006	The Colli Albani mafic caldera (Roma, Italy): stratigraphy, structure and petrology	J. Volcanol. Geotherm. Res., 155: 49-80
211004	Colli Albani	Giordano G, De Rita D, Cas R, Rodani S	2002	Valley pond and ignimbrite veneer deposits in the small-volume phreatomagmatic `Peperino Albano' basic ignimbrite, Lago Albano maar, Colli Albani volcano, Italy: influence of topography	J. Volcanol. Geotherm. Res., 118: 131-144
211004	Colli Albani	IAVCEI	1973-80	Post-Miocene Volcanoes of the World	IAVCEI Data Sheets, Rome: Internatl Assoc Volc Chemistry Earth's Interior
211004	Colli Albani	Karner D B, Marra F, Renne P R	2001	The history of the Monti Sabatini and Alban Hills volcanoes: groundwork for assessing volcanic-tectonic hazards for Rome	J. Volcanol. Geotherm. Res., 107: 185-219
211004	Colli Albani	Krafft M	1974	Guide des Volcans d'Europe	Neuchatel: Delachaux & Niestle, 412 p
211004	Colli Albani	Krafft M, Dominique de Larouziere F	1991	Guide des Volcans d'Europe et des Canaries	Lausanne, Switzerland: Delachaux and Niestle, 455 p
211004	Colli Albani	Marra F, Freda C, Scarlato P, Taddeucci J, Karner D B, Renne P R, Gaeta M, Palladino D M, Trigila R, Cavarretta G	2003	Post-caldera activity in the Alban Hills volcanic district (Italy): 40Ar/39Ar geochronology and insights into magma evolution	Bull Volcanol, 65: 227-247
211004	Colli Albani	Marra F, Karner D B, Freda C, Gaeta M, Renne P	2009	Large mafic eruptions at Alban Hills volcanic district (Central Italy): chronostratigraphy, petrography and eruptive behavior	J. Volcanol. Geotherm. Res., 179: 217-232
211004	Colli Albani	Newhall C G, Dzurisin D	1988	Historical unrest at large calderas of the world	U S Geol Surv Bull, 1855: 1108 p, 2 vol
211004	Colli Albani	Palladino D M, Gaeta M, Marra F	2001	A large K-foiditic hydromagmatic eruption from the early activity of the Alban Hills volcanic district, Italy	Bull Volcanol, 63: 345-359
211004	Colli Albani	Peccerillo A, Poli G, Tolomeo L	1984	Genesis, evolution and tectonic significance of K-rich volcanics from the Alban Hills (Roman comagmatic region) as inferred from trace element geochemistry	Contr Mineral Petr, 86: 230-240
211004	Colli Albani	Porreca M, Mattei M, MacNiocaill C, Giordano G, McClelland E, Funiciello R	2008	Palemagnetic evidence for low-temperature emplacement of the phreatomagmatic Peperino Albano ignimbrite (Colli Albani volcano, Central Italy)	Bull Volcanol, 70: 877-893
211004	Colli Albani	Scandone R	1987		(pers. comm.)
211004	Colli Albani	Stothers R B, Rampino M R	1983	Volcanic eruptions in the Mediterranean before AD 630 from written and archaeological sources	J. Geophys. Res, 88: 6357-6371
[truncated: 7,285 more rows]
