# Supplementary material for: Clear anti-phase tendency of volcanic eruptions and consistent U.S. Dollar Index response to volcanic forcing
Source: Research Square preprint supplement (doi:10.21203/rs.3.rs-602091/v1), 2021-07-12
Supplement: Supplementary file 3 [file savMXNdata50.xlsx]

## Sheet: Sheet1
				-0.000907097					-0.000206746					0.000463469
				0.076094					0.0168858					-0.028686
				-1.67399					-0.303633					-0.218809
				28.5847					8.82852					114.644
		Year	Raw	Trend	Detrend	MA3	z-score	Raw	Trend	Detrend	MA3	z-score	Raw	Trend	Detrend	MA3	z-score
		1967	29	26.9859	2.01406			8	8.54157	-0.541569			119.955	114.397	5.5584
		1968	27	25.5339	1.46612	-0.247649	-0.099585	7	8.28715	-1.28715	-0.297576	-0.258478	122.058	114.095	7.96335	7.39146	0.687911
		1969	20	24.2231	-4.22313	-0.601749	-0.243618	9	8.06401	0.935986	-1.07403	-0.83386	122.394	113.742	8.65262	8.11396	0.753382
		1970	24	23.0482	0.951764	-2.09171	-0.849672	5	7.87093	-2.87093	-0.547203	-0.44346	121.065	113.339	7.72592	6.98161	0.650772
		1971	19	22.0038	-3.00376	-2.04542	-0.830843	8	7.70666	0.293339	0.950816	0.666627	117.457	112.89	4.5663	2.9919	0.289237
		1972	17	21.0843	-4.08426	0.209229	0.0862539	13	7.56996	5.43004	2.08793	1.50927	109.082	112.398	-3.31653	-3.95824	-0.340562
		1973	28	20.2843	7.71571	1.01101	0.412385	8	7.45959	0.540415	1.53205	1.09734	98.7408	111.865	-13.1245	-8.93463	-0.791506
		1974	19	19.5984	-0.598415	1.03204	0.420938	6	7.3743	-1.3743	-1.71558	-1.30927	100.932	111.295	-10.3629	-11.802	-1.05134
		1975	15	19.0212	-4.02118	-1.38892	-0.563806	3	7.31286	-4.31286	-1.65373	-1.26344	98.77	110.689	-11.9187	-8.89065	-0.787521
		1976	19	18.5472	0.452842	-1.91308	-0.777013	8	7.27403	0.725967	1.05218	0.741741	105.66	110.05	-4.39041	-7.56222	-0.667143
		1977	16	18.1709	-2.17089	-0.868334	-0.352054	14	7.25657	6.74343	1.40339	1.002	103.005	109.383	-6.37761	-9.28396	-0.823161
		1978	17	17.8869	-0.88695	-1.24924	-0.506992	4	7.25923	-3.25923	1.40114	1.00033	91.6042	108.688	-17.0838	-14.4925	-1.29514
		1979	17	17.6899	-0.689883	0.949639	0.387422	8	7.28078	0.719218	-0.286664	-0.250392	87.9533	107.969	-20.0161	-18.8504	-1.69004
		1980	22	17.5742	4.42575	1.06709	0.435195	9	7.31998	1.68002	0.341221	0.214895	87.7783	107.23	-19.4513	-14.0379	-1.25395
		1981	17	17.5346	-0.534608	3.77521	1.53675	6	7.37558	-1.37558	-0.713965	-0.567038	103.825	106.471	-2.64636	-3.61642	-0.309587
		1982	25	17.5655	7.43448	3.41278	1.38933	5	7.44634	-2.44634	-1.78432	-1.36021	116.946	105.697	11.2484	9.93213	0.918138
		1983	21	17.6615	3.33847	3.98525	1.62218	6	7.53103	-1.53103	-1.53526	-1.17565	126.105	104.911	21.1943	22.521	2.05891
		1984	19	17.8172	1.18279	1.83138	0.746079	7	7.6284	-0.628403	-0.298884	-0.259447	139.234	104.114	35.1204	31.3265	2.85682
		1985	19	18.0271	0.972892	2.6233	1.0682	9	7.73722	1.26278	0.259381	0.154248	140.974	103.31	37.6646	27.3275	2.49445
		1986	24	18.2858	5.71421	1.0331	0.421371	8	7.85624	0.143764	1.80744	1.30142	111.698	102.501	9.19752	13.8309	1.27143
		1987	15	18.5878	-3.5878	0.399567	0.163675	12	7.98422	4.01578	1.01321	0.712863	96.3208	101.69	-5.36948	-1.36121	-0.105227
		1988	18	18.9277	-0.927711	-1.93853	-0.787364	7	8.11992	-1.11992	-0.455412	-0.37544	92.9692	100.881	-7.91167	-5.01155	-0.436009
		1989	18	19.3001	-1.30007	-3.30907	-1.34485	4	8.2621	-4.2621	-0.597182	-0.480497	98.3217	100.075	-1.7535	-6.59598	-0.579585
		1990	12	19.6994	-7.69944	-1.70663	-0.693037	12	8.40953	3.59047	0.589141	0.398613	89.1533	99.2761	-10.1228	-6.67171	-0.586448
		1991	24	20.1204	3.87963	-2.12575	-0.863517	11	8.56095	2.43905	1.1048	0.780733	90.3475	98.4864	-8.13887	-9.50654	-0.84333
		1992	18	20.5574	-2.55743	-0.894323	-0.362625	6	8.71513	-2.71513	0.617693	0.419771	87.4508	97.7088	-10.258	-7.09656	-0.624946
		1993	17	21.0052	-4.00517	-3.00691	-1.22194	11	8.87084	2.12916	0.795737	0.551708	94.0533	96.9462	-2.89284	-6.16347	-0.540392
		1994	19	21.4581	-2.45814	-4.12474	-1.67663	12	9.02682	2.97318	1.9735	1.42448	90.8617	96.2012	-5.33958	-6.56947	-0.577183
		1995	16	21.9109	-5.91092	-2.90903	-1.18213	10	9.18184	0.81816	0.818894	0.568868	84.0008	95.4768	-11.476	-8.12874	-0.718478
		1996	22	22.358	-0.358041	-4.35434	-1.77002	8	9.33466	-1.33466	-0.666844	-0.532119	87.205	94.7756	-7.57065	-5.5585	-0.485572
		1997	16	22.7941	-6.79408	-3.78857	-1.53988	8	9.48403	-1.48403	-0.815806	-0.642506	96.4717	94.1005	2.37113	-0.00126131	0.0180069
		1998	19	23.2136	-4.21358	-2.53959	-1.03185	10	9.62873	0.371273	-1.29342	-0.996435	98.65	93.4543	5.19574	4.92131	0.464074
		1999	27	23.6111	3.38889	3.73136	1.51891	7	9.7675	-2.7675	-2.43177	-1.84	100.037	92.8396	7.19707	9.94588	0.919385
		2000	36	23.9812	12.0188	5.36307	2.18262	5	9.8991	-4.8991	-3.22963	-2.43124	109.704	92.2593	17.4448	16.1933	1.4855
		2001	25	24.3185	0.68153	5.6943	2.31735	8	10.0223	-2.0223	-2.01909	-1.53418	115.654	91.7162	23.9379	20.346	1.86181
		2002	29	24.6174	4.38258	1.06383	0.43387	11	10.1359	0.864141	-0.798897	-0.629975	110.868	91.2131	19.6552	16.0649	1.47387
		2003	23	24.8726	-1.87262	3.14377	1.2799	9	10.2385	-1.23853	0.43218	0.282298	95.3542	90.7527	4.60146	7.02546	0.654745
		2004	32	25.0786	6.92136	2.93957	1.19684	12	10.3291	1.67093	0.342048	0.215508	87.1575	90.3378	-3.18032	-0.352258	-0.0137993
		2005	29	25.23	3.76998	3.45667	1.40718	11	10.4063	0.593748	0.265284	0.158622	87.4933	89.9712	-2.47791	-3.13549	-0.266007
		2006	25	25.3213	-0.321337	0.367168	0.150497	9	10.4688	-1.46882	-0.796874	-0.628477	85.9075	89.6557	-3.74824	-5.09036	-0.443151
		2007	23	25.3471	-2.34713	-0.990148	-0.401603	9	10.5155	-1.51555	0.490148	0.325255	80.3492	89.3941	-9.04494	-8.29743	-0.733765
		2008	25	25.302	-0.301974	-1.94317	-0.789254	15	10.5452	4.45482	0.794259	0.550612	77.09	89.1891	-12.0991	-9.8178	-0.871536
		2009	22	25.1804	-3.18041	-1.15313	-0.467898	10	10.5565	-0.556492	0.450031	0.295527	80.7342	89.0435	-8.30936	-9.29398	-0.824069
		2010	25	24.977	0.0229919	-2.94791	-1.19794	8	10.5482	-2.54823	-0.207962	-0.19207	81.4867	88.9602	-7.47349	-9.44626	-0.837868
		2011	19	24.6863	-5.68632	-1.98874	-0.807789	13	10.5192	2.48084	0.154855	0.0767904	76.3858	88.9418	-12.5559	-9.53074	-0.845524
		2012	24	24.3029	-0.302899	-1.60351	-0.651093	11	10.468	0.531958	1.20639	0.856016	80.4283	88.9911	-8.56281	-9.59299	-0.851164
		2013	25	23.8213	1.17869	1.54656	0.630225	11	10.3936	0.606368	0.281211	0.170425	81.4508	89.1111	-7.66023	-7.49939	-0.661449
		2014	27	23.2361	3.76389	1.13358	0.462241	10	10.2947	-0.294692	3.04723	2.22015	83.0292	89.3043	-6.27514	-2.25718	-0.186417
		2015	21	22.5418	-1.54185	-0.503682	-0.203729	19	10.17	8.83002	2.50569	1.81885	96.7375	89.5737	7.16383	2.71726	0.264351
		2016	18	21.7331	-3.73309	-0.69311	-0.28078	9	10.0183	-1.01826	2.32449	1.68457	97.185	89.9219	7.26309	6.65409	0.621093
		2017	24	20.8044	3.19561	1.57074	0.640058	9	9.83828	-0.838283	-0.828452	-0.651876	95.8872	90.3518	5.53535	5.17692	0.487237
		2018	25	19.7503	5.24969	1.2933	0.527209	9	9.62881	-0.628815	-1.61857	-1.23738	93.5985	90.8662	2.73232	4.66324	0.440689
		2019	14	18.5654	-4.5654	0.14669	0.0608156	6	9.38861	-3.38861	-1.71129	-1.30609	97.1898	91.4678	5.72206	3.88381	0.370059
		2020	17	17.2442	-0.244222			8	9.11644	-1.11644			95.3564	92.1594	3.19704

## Sheet: Sheet2
		1967	390030	282020	261170	300240	261160	312160	263300	273070	357060	241100	257020	221080	300260	284130	284010	282110	263180	223020	342090	261140	284140	357040	311360	257050	252120	343100	345040	282050	241040
		1968	344070	332010	284133	241080	255020	267040	345033	284010	282020	266030	300260	300240	257020	357010	353060	353010	273030	290070	284130	273070	241040	264010	284010	261160	284120	243070	263280
		1969	272020	252010	257020	345020	300260	311020	315020	263090	263180	241100	354020	332010	355100	390030	290380	344040	284010	282050	264180	312160
		1970	300240	241100	257070	390030	264180	290070	284210	284010	333030	272020	300260	300130	257050	372070	282110	343100	284070	300240	252120	264010	243030	344070	284120	266100
		1971	383010	313010	358057	282090	300260	266030	257020	266100	344020	241040	211060	284010	300250	257040	344070	252010	273070	283230	376010
		1972	263250	390030	311320	233010	282050	360160	333020	355100	257060	290160	257040	373010	263310	390020	357110	300260	263210
		1973	312030	282050	300240	257020	284133	311161	263180	290360	290120	357070	290030	243102	244000	290070	233020	257060	257070	251050	264010	311320	342090	241050	341040	282110	376010	390020	241080	255060
		1974	251070	342090	332010	345040	355100	312160	282050	263180	312030	264010	251020	345060	284010	261230	243100	251030	311320	257050	264250
		1975	282110	284090	311240	312030	284131	332020	284091	390070	342090	344040	241100	257050	241080	261140	257060
		1976	344040	241100	344020	255060	284080	284130	311161	345040	263340	300250	264250	241100	283120	313010	284120	257020	331021	373080	332010
		1977	242050	284080	284133	332010	257040	285030	241080	263340	345040	257020	312131	300250	233020	311180	342090	360160
		1978	313020	221126	345040	290030	262000	255060	358060	285040	252120	211060	273030	241050	311360	284131	341040	333060	283180
		1979	283040	333060	257070	262000	261030	257060	257050	257040	243070	284133	290260	358060	263200	300250	311340	251030	284096
		1980	241100	252120	234070	345040	268060	300270	300250	372070	272020	311070	312030	357120	263310	311310	300250	257050	267020	262000	332010	223020	242050	353050
		1981	373080	312030	263200	290030	241050	284170	290390	262000	372070	312030	311290	211060	233020	373080	284133	333060	312030
		1982	264220	283120	257050	224010	300260	311320	353020	284070	331030	267020	241040	242050	257020	284210	263140	290390	341120	300260	333010	261140	333060	311070	344120	223020	290390
		1983	252120	357120	263090	283120	266010	282110	284110	333010	312030	311290	284096	312070	373010	284070	283090	283110	211060	344120	333060	258020	290150
		1984	355100	312070	273030	373010	357120	211060	266100	264150	285070	211060	357110	282110	241100	332020	223020	300250	263140	333010	233020
		1985	252120	343100	272020	351020	344020	284142	341040	354010	390028	285050	241100	266030	352020	300130	272020	264150	333010	252120	284100
		1986	290360	257040	284070	290260	355100	290240	224030	261160	261120	261030	284096	284100	242050	300260	272020	311161	333060	311310	311240	266100	311360	211060	341130	284096
		1987	344020	264220	284170	311190	311070	241100	284110	341040	333060	311060	268040	345020	312070	311120	300250
		1988	353010	284170	334050	272020	344120	282110	241100	284070	273010	268060	257040	284121	282060	282030	223020	264071	357010	355100
		1989	256010	300250	267020	283010	241100	224010	290070	223020	283090	311320	344100	351080	290380	283120	360160	357100	285050	241100
		1990	335030	284010	334120	311020	360160	263280	233020	263340	300270	351080	342110	355040
		1991	264220	223020	311320	358057	233020	261030	267020	243070	266030	266100	264180	264220	345020	255060	353010	300260	260010	334050	335020	345040	341040	300100	282100	321050
		1992	300260	357120	233020	284080	273083	313040	234010	344070	267040	300250	311320	284131	241100	234010	211060	282090	334050	311340
		1993	284080	311360	272020	311310	211060	263350	311180	352080	263340	273083	211060	341021	284170	234010	311180	234011	284130
		1994	273010	357120	300260	264010	344040	284130	284080	341040	263340	300250	211060	264030	351020	345040	263350	284080	311110	355100	353040
		1995	312070	267020	357110	282120	264030	263310	355040	360050	373030	256010	243070	344070	311310	353010	343100	241100
		1996	290390	223020	285070	355100	373010	311070	311190	272020	268060	334070	284170	311160	267010	257040	261120	285020	282100	300125	300130	234000	252140	242050
		1997	283090	300260	290390	283260	360101	282060	264050	311360	344020	263340	262000	284110	300270	255060	263200	344100
		1998	357110	284080	223020	284130	353060	344100	312110	264010	300250	300270	284110	311161	282060	261030	357110	241040	233020	345020	343100
		1999	311360	284120	284130	344070	263340	233020	372030	273030	282030	264250	342090	344040	315020	261140	300270	224010	267020	264010	261030	300250	255060	300260	257060	390090	243030	282030	357040
		2000	284110	282060	252120	285020	263350	261220	342110	373030	311360	300260	263180	273030	357090	300060	284040	233020	262000	224010	266030	390090	266100	285030	300060	261140	241040	256010	255020	372070	233020	300260	284110	260010	282060	344100	255060	252120
		2001	300130	284130	284110	390081	243091	261160	284120	262000	211060	251020	233020	257050	268030	355100	234011	344100	233020	241040	311240	344040	273030	261030	282030	263310	284080
		2002	300260	233020	256010	263100	352010	242050	251020	211060	357110	267010	312070	252120	284090	251070	315020	263350	223020	311161	263340	252010	256010	257060	284110	290360	343100	251020	233020	300250	360160
		2003	344100	266100	357070	268060	300250	282110	264200	344020	234010	257050	334040	264180	284200	290360	244000	252120	242050	284110	282060	283110	266100	284130	272020
		2004	344040	373010	251020	321050	257050	300260	211060	357120	290260	342110	311161	284120	273030	267040	341090	268030	223020	233020	252120	267020	344040	243060	255060	282060	252080	311360	257060	211060	355100	284080	284110	251020
		2005	300250	257030	344020	257050	353050	312070	273030	344120	373030	290120	260010	353010	355100	266030	282110	284040	261160	311240	290360	284080	344100	311161	233020	252140	272020	341090	312070	344020	284040
		2006	223020	251070	345040	312260	344120	252010	344040	344100	233020	264260	233010	355100	373030	300250	354020	273010	263250	234010	342110	252120	273030	311240	266030	266020	211060
		2007	344020	344040	262000	241100	261170	312030	221115	263340	268040	222120	344040	251070	300250	255060	283040	211060	352010	290360	300260	264260	266030	344040	284170
		2008	243120	243130	351050	373030	273030	283110	311130	290360	352010	300250	241130	263340	263250	260010	284040	358041	264160	268030	252070	257050	312070	282110	311360	345040	261160
		2009	282090	263200	252010	344020	290120	300260	221115	290240	242050	251030	284170	353010	284040	261170	262000	313030	352020	290380	283110	311240	300090	285070
		2010	263250	233020	290240	260010	311240	357040	261080	211060	267020	354020	290380	284120	300070	311240	284193	300250	284040	211060	282090	372020	251030	263300	223020	352080	300250
		2011	300260	358057	345020	262000	266030	266100	222120	352090	357150	257030	284170	331021	351080	300260	266100	357040	282090	221041	352080
		2012	290150	252120	263340	264150	290390	268060	266100	344020	234010	300260	266030	241040	241080	242050	252010	264270	252080	261140	351020	345020	284120	264230	221020	352080
		2013	260010	263090	221020	344040	261080	211060	300260	252120	284090	263340	290260	344020	263300	261170	312030	344100	273030	260010	251030	352090	268040	252140	341040	357090	252010
		2014	263340	384010	390090	345070	373030	342110	354006	252140	251020	267020	312030	264050	223020	284141	262000	263250	263180	263280	267020	344020	261140	255060	311360	263340	343100	263250	252010
		2015	264030	252010	344100	290390	344040	300260	360160	268060	263170	222120	283110	342110	282050	353020	273010	358020	344020	266030	300260	290290	357120
		2016	354006	252120	282110	222120	241040	354020	233020	268060	343100	273010	345040	233020	390080	311240	352090	343100	344090	263310
		2017	290240	282090	257030	353010	344020	261170	352090	252120	261140	300130	357090	345020	267020	263200	222120	360160	282080	264100	344020	233020	243030	260010	311300	223020
		2018	268060	266030	252120	290200	290240	311060	312070	290390	352090	233005	262000	353010	263250	344020	261170	223020	233020	282090	267020	283120	343100	251002	272020	261230	256010
		2019	283110	263090	311060	354020	311120	341040	282110	352090	233020	263310	261080	256010	267020	282050
		2020	263310	264230	255060	282050	261080	344040	263340	345070	311240	255060	343100	233020	345020	353010	282050	284096	311240

## Sheet: Sheet3
		1967	332010	257040	263090	290061	263280	252010	345020	343030
		1968	267030	211050	264140	373050	353010	265060	251050
		1969	255060	241040	345020	274020	284142	264100	332010	241080	284120
		1970	371020	261120	264270	252010	284010
		1971	257060	360150	211060	342090	332010	290380	241100	267020
		1972	251070	358020	255020	358060	357070	355090	334070	290390	262000	233020	353010	241080	250030
		1973	352010	332010	241100	252120	290390	332010	261230	290070
		1974	241040	222120	222010	351080	300260	311120
		1975	233020	262000	263340
		1976	311320	267020	284133	257050	264010	284131	341040	284134
		1977	266110	360160	233020	344020	342090	255060	282110	353010	345060	255060	357120	257040	223020	241040
		1978	273010	272020	344120	242050
		1979	300250	345040	211060	284132	282090	242050	311360	284120
		1980	264150	357091	282110	257070	290270	257040	284120	357010	284141
		1981	311360	282110	300250	257040	344040	300260
		1982	312030	284110	284120	284133	211060
		1983	264250	268060	345020	332010	261140	284133
		1984	261140	332000	241100	257040	353010	300260	284100
		1985	241100	263090	282030	263340	300260	264050	233020	300250	211060
		1986	300260	311290	263200	255060	241130	284130	284130	255060
		1987	284010	311230	284070	290380	311240	345040	284210	283090	311020	313020	345020	373030
		1988	300270	211060	268070	341040	243040	265090	266100
		1989	311240	211060	284080	290240
		1990	343010	257040	283110	242050	354006	282030	312030	357110	300250	311320	313030	321050
		1991	355100	263290	263340	284130	241100	273083	264071	272020	372070	290380	261170
		1992	357110	357090	311300	272020	345040	263250
		1993	284120	300250	264250	268060	243060	355160	273030	355100	351080	252120	311320
		1994	345060	311240	261230	252140	284120	355100	223020	223030	262000	241100	268060	355130
		1995	300250	357090	263340	284080	241040	357120	257030	283070	341090	260010
		1996	300260	242050	373030	241100	331031	258001	284080	311360
		1997	284080	241100	344100	283260	300250	242050	311190	311290
		1998	311360	261170	284110	352020	300260	261170	357120	242050	300250	341040
		1999	290100	352080	284110	263350	263180	344020	264180
		2000	284130	263340	251020	300250	234010
		2001	284080	342110	284121	300100	284141	261140	223020	284040
		2002	355100	273030	352020	252140	284080	242050	223030	282060	266100	211060	352020
		2003	273030	354006	263200	284211	233020	251020	352020	357110	272020
		2004	352010	282030	266030	283110	351080	344100	264160	234070	261170	263340	360050	312070
		2005	252070	233020	284130	234011	284130	252010	233010	360050	252120	264160	252010
		2006	257040	284040	243080	273030	267020	345040	284200	242030	284040
		2007	263280	351080	221010	252080	252120	257050	344120	233010	242050
		2008	221060	233020	256010	282090	311290	344040	266030	257040	211060	261170	267020	357110	252120	284200	344120
		2009	233020	311240	257020	311240	243040	357070	242010	263200	345040	267020
		2010	262000	251020	252140	290270	344020	252120	344120	345040
		2011	383020	344020	261140	252010	311240	282110	263300	252140	267020	344040	345070	263310	300230
		2012	241080	357120	345020	261140	290070	344100	311110	251030	345070	261170	268060
		2013	300120	264250	357120	312070	345070	355100	263090	290070	284305	344020	300240
		2014	290260	312030	264180	282110	273030	344020	357090	233020	300120	282110
		2015	355100	243060	357090	352050	343100	264270	283020	354006	345020	266100	344040	331021	345070	290360	233020	343100	352090	243040	268060
		2016	300130	290360	241040	344020	290360	273010	266030	272020	261140
		2017	264050	233020	273010	284096	345040	300010	262000	343100	300120
		2018	260010	353050	344040	311120	252120	300130	263200	273030	264020
		2019	252120	290240	344020	300130	345040	357040
		2020	332010	233020	357090	282060	300130	273070	241040	311060

## Sheet: Sheet4
																																			252120
																																			255060
																																			344100
																																			282060
																																			260010				251020
																																			284110				284110
																																			300260				284080
		241040																																	233020		360160		355100	284040
		282050						255060																											372070		300250		211060	344020
		345040	263280					241080																										357040	255020		233020		257060	312070									252010
		343100	243070					390020																										282030	256010		251020		311360	341090									263250
		252120	284120					376010									290390																	243030	241040	284080	343100		252080	272020	211060		261160		300250			252010	343100
		257050	261160		266100			282110									223020				284096					321050								390090	261140	263310	290360		282060	252140	266020		345040		352080		352080	357090	263340
		311360	284010		284120			341040									344120				341130					282100								257060	300060	282030	284110	272020	255060	233020	266030	284170	311360		223020		221020	341040	311360
		357040	264010		344070			241050							353050		311070				211060					300100					242050			300260	285030	261030	257060	284130	243060	311161	311240	344040	282110	285070	263300		264230	252140	255060
		284140	241040		243030			342090							242050		333060	290150			311360					341040					252140			255060	266100	273030	256010	266100	344040	344100	273030	266030	312070	300090	251030		284120	268040	261140
		261140	273070	312160	264010			311320							223020		261140	258020			266100					345040					234000			300250	390090	344040	252010	283110	267020	284080	252120	264260	257050	311240	372020		345020	352090	344020
		342090	284130	264180	252120	376010		264010	264250		332010				332010		333010	333060	233020	284100	311240					335020			353040		300130		343100	261030	266030	311240	263340	282060	252120	290360	342110	300260	252070	283110	282090	352080	351020	251030	267020
		223020	290070	282050	300240	283230		251050	257050		373080				262000		300260	344120	333010	252120	311310		355100	241100		334050	311340		355100		300125		345020	264010	224010	241040	311161	284110	233020	311240	234010	290360	268030	290380	211060	221041	261140	260010	263280
		263180	273030	284010	284070	273070	263210	257070	311320		331021		283180	284096	267020	312030	341120	211060	263140	333010	333060		357010	285050		260010	334050	284130	311110		282100		233020	267020	262000	233020	223020	242050	223020	261160	263250	352010	264160	352020	284040	282090	252080	273030	263180
		282110	353010	344040	343100	252010	300260	257060	251030		257020	360160	333060	251030	257050	333060	290390	283110	300250	264150	311161		264071	357100		300260	282090	234011	284080	241100	285020	344100	241040	224010	233020	344100	263350	252120	268030	284040	273010	211060	358041	313030	300250	357040	264270	344100	263250
		284010	353060	290380	282110	344070	357110	233020	243100	257060	284120	342090	341040	311340	300250	284133	263140	283090	223020	272020	272020	300250	223020	360160		353010	211060	311180	263350	343100	261120	263200	357110	300270	284040	234011	315020	244000	341090	282110	354020	283040	284040	262000	284193	266100	252010	312030	262000
		284130	357010	390030	372070	257040	390020	290070	261230	261140	313010	311180	284131	300250	311310	373080	284210	284070	332020	300130	300260	311120	282030	283120		255060	234010	234010	345040	353010	257040	255060	261030	261140	300060	355100	251070	290360	267040	266030	300250	255060	260010	261170	311240	300260	242050	261170	284141
		300260	257020	355100	257050	300250	263310	244000	284010	241080	283120	233020	311360	263200	263310	233020	257020	373010	241100	352020	242050	312070	282060	290380		345020	241100	284170	351020	311310	267010	300270	282060	315020	357090	268030	284090	284200	273030	355100	373030	300250	263250	284040	300070	351080	241080	263300	223020
		221080	300240	332010	300130	284010	373010	243102	345060	257050	241100	300250	241050	358060	357120	211060	242050	312070	282110	266030	284100	345020	284121	351080	355040	264220	284131	341021	264030	344070	311160	284110	311161	344040	273030	257050	252120	264180	284120	353010	355100	251070	263340	353010	284120	331021	241040	344020	264050
		257020	300260	354020	300260	211060	257040	290030	251020	241100	264250	312131	273030	290260	312030	311290	241040	284096	357110	241100	284096	268040	257040	344100	342110	264180	311320	211060	211060	243070	284170	262000	284110	342090	263180	233020	312070	334040	311161	260010	233010	344040	241130	284170	290380	284170	266030	290260	312030
		241100	266030	241100	272020	241040	290160	357070	264010	344040	300250	257020	211060	284133	311070	312030	267020	311290	211060	285050	261030	311060	268060	311320	351080	266100	300250	273083	300250	256010	334070	263340	300270	264250	300260	251020	267010	257050	342110	290120	264260	222120	300250	251030	354020	257030	300260	263340	267020
		357060	282020	263180	333030	344020	257060	290120	312030	342090	263340	345040	252120	243070	272020	372070	331030	312030	285070	390028	261120	333060	273010	283090	300270	266030	267040	263340	263340	373030	268060	344020	300250	282030	311360	211060	357110	234010	290260	373030	233020	268040	352010	242050	267020	357150	234010	284090	251020
		273070	284010	263090	284010	266100	355100	290360	263180	390070	345040	263340	285040	257040	372070	262000	284070	333010	264150	354010	261160	341040	284070	223020	263340	243070	344070	352080	341040	360050	272020	311360	264010	273030	373030	262000	211060	344020	357120	344120	344100	263340	290360	290240	211060	352090	344020	252120	252140
		263300	345033	315020	284210	257020	333020	263180	282050	284091	311161	241080	358060	257050	300250	290390	353020	284110	266100	341040	224030	284110	241100	290070	233020	267020	234010	311180	284080	355040	311190	264050	312110	372030	342110	284120	251020	264200	211060	273030	344040	221115	311130	221115	261080	222120	266100	300260	354006
		312160	267040	311020	290070	266030	360160	311161	312160	332020	284130	285030	255060	257060	300270	284170	311320	282110	211060	284142	290240	241100	282110	224010	263280	261030	313040	263350	284130	263310	311070	282060	344100	233020	261220	261160	242050	282110	300260	312070	252010	312030	283110	300260	357040	266100	268060	211060	342110
		261160	255020	300260	264180	300260	282050	284133	355100	284131	284080	257040	262000	261030	268060	241050	300260	266010	357120	344020	355100	311070	344120	241100	360160	233020	273083	211060	344040	264030	373010	360101	353060	263340	263350	243091	352010	300250	257050	353050	344120	261170	273030	290120	311240	266030	290390	261080	373030
		300240	241080	345020	390030	282090	233010	257020	345040	312030	255060	332010	290030	262000	345040	290030	224010	283120	373010	351020	290260	311190	272020	283010	311020	358057	284080	311310	264010	282120	355100	283260	284130	344070	285020	390081	263100	268060	321050	257050	312260	241100	373030	344020	260010	262000	264150	344040	345070
		261170	284133	257020	257070	358057	311320	300240	332010	311240	344020	284133	345040	257070	234070	263200	257050	263090	273030	272020	284070	284170	334050	267020	334120	311320	233020	272020	300260	357110	285070	290390	223020	284130	252120	284110	256010	357070	251020	344020	345040	262000	351050	252010	290240	345020	263340	221020	390090
		282020	332010	252010	241100	313010	390030	282050	342090	284090	241100	284080	221126	333060	252120	312030	283120	357120	312070	343100	257040	264220	284170	300250	284010	223020	357120	311360	357120	267020	223020	300260	284080	284120	282060	284130	233020	266100	373010	257030	251070	344040	243130	263200	233020	358057	252120	263090	384010
		390030	344070	272020	300240	383010	263250	312030	251070	282110	344040	242050	313020	283040	241100	373080	264220	252120	355100	252120	290360	344020	353010	256010	335030	264220	300260	284080	273010	312070	290390	283090	357110	311360	284110	300130	300260	344100	344040	300250	223020	344020	243120	282090	263250	300260	290150	260010	263340
		1967	1968	1969	1970	1971	1972	1973	1974	1975	1976	1977	1978	1979	1980	1981	1982	1983	1984	1985	1986	1987	1988	1989	1990	1991	1992	1993	1994	1995	1996	1997	1998	1999	2000	2001	2002	2003	2004	2005	2006	2007	2008	2009	2010	2011	2012	2013	2014
[truncated: 6 more columns]

## Sheet: Sheet5




																																											344120
												241040																															284200
							250030					223020																															252120			300230
							241080					257040										373030			321050				355130										312070				357110			263310
							353010					357120										345020			313030	261170		311320	268060								352020		360050	252010			267020			345070	268060	300240
							233020					255060										313020			311320	290380		252120	241100	260010			341040				211060		263340	264160			261170	267020		344040	261170	344020	282110
				284120			262000					345060			284141					211060		311020			300250	372070		351080	262000	341090			300250				266100	272020	261170	252120	284040	242050	211060	345040		267020	345070	284305	300120
		343030		241080		267020	290390	290070			284134	353010		284120	357010					300250	255060	283090			357110	272020		355100	223030	283070	311360	311290	242050			284040	282060	357110	234070	360050	242030	233010	257040	263200	345040	252140	251030	290070	233020
		345020	251050	332010		241100	334070	261230			341040	282110		311360	284120				284100	233020	284130	284210	266100		312030	264071		273030	223020	257030	284080	311190	357120	264180		223020	223030	352020	264160	233010	284200	344120	266030	242010	344120	263300	311110	263090	357090
		252010	265060	264100		290380	355090	332010	311120		284131	255060		242050	257040	300260		284133	300260	264050	284130	345040	265090		282030	273083	263250	355160	355100	357120	258001	242050	261170	344020		261140	242050	251020	344100	252010	345040	257050	344040	357070	252120	282110	344100	355100	344020
		263280	353010	284142	284010	332010	357070	290390	300260		264010	342090		282090	290270	344040	211060	261140	353010	300260	241130	311240	243040		354006	241100	345040	243060	284120	241040	331031	300250	300260	263180	234010	284141	284080	233020	351080	284130	267020	252120	311290	243040	344020	311240	290070	345070	273030
		290061	373050	274020	252010	342090	358060	252120	351080		257050	344020	242050	284132	257070	257040	284133	332010	257040	263340	255060	290380	341040	290240	242050	284130	272020	268060	252140	284080	241100	283260	352020	263350	300250	300100	252140	284211	283110	234011	273030	252080	282090	311240	290270	252010	261140	312070	282110
		263090	264140	345020	264270	211060	255020	241100	222010	263340	284133	233020	344120	211060	282110	300250	284120	345020	241100	282030	263200	284070	268070	284080	283110	263340	311300	264250	261230	263340	373030	344100	284110	284110	251020	284121	352020	263200	266030	284130	243080	221010	256010	257020	252140	261140	345020	357120	264180
		257040	211050	241040	261120	360150	358020	332010	222120	262000	267020	360160	272020	345040	357091	282110	284110	268060	332000	263090	311290	311230	211060	211060	257040	263290	357090	300250	311240	357090	242050	241100	261170	352080	263340	342110	273030	354006	282030	233020	284040	351080	233020	311240	251020	344020	357120	264250	312030
		332010	267030	255060	371020	257060	251070	352010	241040	233020	311320	266110	273010	300250	264150	311360	312030	264250	261140	241100	300260	284010	300270	311240	343010	355100	357110	284120	345060	300250	300260	284080	311360	290100	284130	284080	355100	273030	352010	252070	257040	263280	221060	233020	262000	383020	241080	300120	290260
		1967	1968	1969	1970	1971	1972	1973	1974	1975	1976	1977	1978	1979	1980	1981	1982	1983	1984	1985	1986	1987	1988	1989	1990	1991	1992	1993	1994	1995	1996	1997	1998	1999	2000	2001	2002	2003	2004	2005	2006	2007	2008	2009	2010	2011	2012	2013	2014
[truncated: 6 more columns]
