# Supplementary material for: Clear anti-phase tendency of volcanic eruptions and consistent U.S. Dollar Index response to volcanic forcing
Source: Research Square preprint supplement (doi:10.21203/rs.3.rs-602091/v1), 2021-07-12
Supplement: Supplementary file 4 [file savMXNdata50s.xlsx]

## Sheet: Sheet1
				-0.000921865					-0.000206746					0.000463469
				0.0771319					0.0168858					-0.028686
				-1.69314					-0.303633					-0.218809
				28.6588					8.82852					114.644
		Year	Raw	Trend	Detrend	MA3	z-score	Raw	Trend	Detrend	MA3	z-score	Raw	Trend	Detrend	MA3	z-score
		1967	29	27.0419	1.95811			8	8.54157	-0.541569			119.955	114.397	5.5584
		1968	27	25.5737	1.42631	-0.288091	-0.119488	7	8.28715	-1.28715	-0.297576	-0.258478	122.058	114.095	7.96335	7.39146	0.687911
		1969	20	24.2487	-4.2487	-0.627921	-0.257456	9	8.06401	0.935986	-1.07403	-0.83386	122.394	113.742	8.65262	8.11396	0.753382
		1970	24	23.0614	0.938625	-2.10542	-0.85731	5	7.87093	-2.87093	-0.547203	-0.44346	121.065	113.339	7.72592	6.98161	0.650772
		1971	19	22.0062	-3.00619	-2.04839	-0.834157	8	7.70666	0.293339	0.950816	0.666627	117.457	112.89	4.5663	2.9919	0.289237
		1972	17	21.0776	-4.07762	0.215359	0.0849095	13	7.56996	5.43004	2.08793	1.50927	109.082	112.398	-3.31653	-3.95824	-0.340562
		1973	28	20.2701	7.72988	1.0247	0.413497	8	7.45959	0.540415	1.53205	1.09734	98.7408	111.865	-13.1245	-8.93463	-0.791506
		1974	19	19.5782	-0.578162	1.05183	0.424511	6	7.3743	-1.3743	-1.71558	-1.30927	100.932	111.295	-10.3629	-11.802	-1.05134
		1975	15	18.9962	-3.99622	-1.36438	-0.556454	3	7.31286	-4.31286	-1.65373	-1.26344	98.77	110.689	-11.9187	-8.89065	-0.787521
		1976	19	18.5188	0.481233	-1.88508	-0.767854	8	7.27403	0.725967	1.05218	0.741741	105.66	110.05	-4.39041	-7.56222	-0.667143
		1977	16	18.1403	-2.14026	-0.838069	-0.342774	14	7.25657	6.74343	1.40339	1.002	103.005	109.383	-6.37761	-9.28396	-0.823161
		1978	17	17.8552	-0.855179	-1.21781	-0.496946	4	7.25923	-3.25923	1.40114	1.00033	91.6042	108.688	-17.0838	-14.4925	-1.29514
		1979	17	17.658	-0.657985	0.981229	0.395847	8	7.28078	0.719218	-0.286664	-0.250392	87.9533	107.969	-20.0161	-18.8504	-1.69004
		1980	22	17.5431	4.45685	1.09791	0.443218	9	7.31998	1.68002	0.341221	0.214895	87.7783	107.23	-19.4513	-14.0379	-1.25395
		1981	17	17.5051	-0.50514	3.80443	1.54204	6	7.37558	-1.37558	-0.713965	-0.567038	103.825	106.471	-2.64636	-3.61642	-0.309587
		1982	25	17.5384	7.46157	3.43965	1.39395	5	7.44634	-2.44634	-1.78432	-1.36021	116.946	105.697	11.2484	9.93213	0.918138
		1983	21	17.6375	3.36252	4.00911	1.62514	6	7.53103	-1.53103	-1.53526	-1.17565	126.105	104.911	21.1943	22.521	2.05891
		1984	19	17.7968	1.20323	1.85167	0.749238	7	7.6284	-0.628403	-0.298884	-0.259447	139.234	104.114	35.1204	31.3265	2.85682
		1985	19	18.0108	0.989246	2.63952	1.0691	9	7.73722	1.26278	0.259381	0.154248	140.974	103.31	37.6646	27.3275	2.49445
		1986	24	18.2739	5.72609	1.04487	0.421686	8	7.85624	0.143764	1.80744	1.30142	111.698	102.501	9.19752	13.8309	1.27143
		1987	15	18.5807	-3.58071	0.406583	0.162545	12	7.98422	4.01578	1.01321	0.712863	96.3208	101.69	-5.36948	-1.36121	-0.105227
		1988	18	18.9256	-0.925622	-1.93648	-0.788721	7	8.11992	-1.11992	-0.455412	-0.37544	92.9692	100.881	-7.91167	-5.01155	-0.436009
		1989	18	19.3031	-1.30311	-3.31212	-1.34722	4	8.2621	-4.2621	-0.597182	-0.480497	98.3217	100.075	-1.7535	-6.59598	-0.579585
		1990	12	19.7076	-7.70764	-1.71481	-0.698726	12	8.40953	3.59047	0.589141	0.398613	89.1533	99.2761	-10.1228	-6.67171	-0.586448
		1991	24	20.1337	3.86631	-2.13902	-0.870949	11	8.56095	2.43905	1.1048	0.780733	90.3475	98.4864	-8.13887	-9.50654	-0.84333
		1992	18	20.5757	-2.57572	-0.912538	-0.373008	6	8.71513	-2.71513	0.617693	0.419771	87.4508	97.7088	-10.258	-7.09656	-0.624946
		1993	17	21.0282	-4.02821	-3.02985	-1.23262	11	8.87084	2.12916	0.795737	0.551708	94.0533	96.9462	-2.89284	-6.16347	-0.540392
		1994	19	21.4856	-2.48561	-4.15208	-1.68824	12	9.02682	2.97318	1.9735	1.42448	90.8617	96.2012	-5.33958	-6.56947	-0.577183
		1995	16	21.9424	-5.94241	-2.94036	-1.19629	10	9.18184	0.81816	0.818894	0.568868	84.0008	95.4768	-11.476	-8.12874	-0.718478
		1996	22	22.3931	-0.393066	-4.38917	-1.7845	8	9.33466	-1.33466	-0.666844	-0.532119	87.205	94.7756	-7.57065	-5.5585	-0.485572
		1997	16	22.8321	-6.83205	-3.82632	-1.55598	8	9.48403	-1.48403	-0.815806	-0.642506	96.4717	94.1005	2.37113	-0.00126131	0.0180069
		1998	19	23.2538	-4.25383	-2.57959	-1.04982	10	9.62873	0.371273	-1.29342	-0.996435	98.65	93.4543	5.19574	4.92131	0.464074
		1999	27	23.6529	3.34712	3.68988	1.49554	7	9.7675	-2.7675	-2.43177	-1.84	100.037	92.8396	7.19707	9.94588	0.919385
		2000	36	24.0237	11.9763	5.32094	2.15774	5	9.8991	-4.8991	-3.22963	-2.43124	109.704	92.2593	17.4448	16.1933	1.4855
		2001	25	24.3606	0.639354	5.65246	2.29233	8	10.0223	-2.0223	-2.01909	-1.53418	115.654	91.7162	23.9379	20.346	1.86181
		2002	29	24.6583	4.3417	1.02332	0.412934	11	10.1359	0.864141	-0.798897	-0.629975	110.868	91.2131	19.6552	16.0649	1.47387
		2003	23	24.9111	-1.9111	3.10569	1.25836	9	10.2385	-1.23853	0.43218	0.282298	95.3542	90.7527	4.60146	7.02546	0.654745
		2004	32	25.1135	6.88649	2.90513	1.17694	12	10.3291	1.67093	0.342048	0.215508	87.1575	90.3378	-3.18032	-0.352258	-0.0137993
		2005	29	25.26	3.74	3.42715	1.38887	11	10.4063	0.593748	0.265284	0.158622	87.4933	89.9712	-2.47791	-3.13549	-0.266007
		2006	25	25.345	-0.345032	0.343962	0.137121	9	10.4688	-1.46882	-0.796874	-0.628477	85.9075	89.6557	-3.74824	-5.09036	-0.443151
		2007	23	25.3631	-2.36308	-1.00558	-0.410782	9	10.5155	-1.51555	0.490148	0.325255	80.3492	89.3941	-9.04494	-8.29743	-0.733765
		2008	25	25.3086	-0.308619	-1.94927	-0.793914	15	10.5452	4.45482	0.794259	0.550612	77.09	89.1891	-12.0991	-9.8178	-0.871536
		2009	22	25.1761	-3.17611	-1.14825	-0.468705	10	10.5565	-0.556492	0.450031	0.295527	80.7342	89.0435	-8.30936	-9.29398	-0.824069
		2010	25	24.96	0.0399789	-2.93032	-1.19221	8	10.5482	-2.54823	-0.207962	-0.19207	81.4867	88.9602	-7.47349	-9.44626	-0.837868
		2011	19	24.6548	-5.65483	-1.95661	-0.796894	13	10.5192	2.48084	0.154855	0.0767904	76.3858	88.9418	-12.5559	-9.53074	-0.845524
		2012	24	24.255	-0.254989	-1.55493	-0.633815	11	10.468	0.531958	1.20639	0.856016	80.4283	88.9911	-8.56281	-9.59299	-0.851164
		2013	25	23.755	1.24502	1.61358	0.652578	11	10.3936	0.606368	0.281211	0.170425	81.4508	89.1111	-7.66023	-7.49939	-0.661449
		2014	27	23.1493	3.85073	1.22114	0.493248	10	10.2947	-0.294692	3.04723	2.22015	83.0292	89.3043	-6.27514	-2.25718	-0.186417
		2015	21	22.4323	-1.43233	-0.393411	-0.162246	19	10.17	8.83002	2.50569	1.81885	96.7375	89.5737	7.16383	2.71726	0.264351
		2016	18	21.5986	-3.59863	-0.55786	-0.229012	9	10.0183	-1.01826	2.32449	1.68457	97.185	89.9219	7.26309	6.65409	0.621093
		2017	24	20.6426	3.35738	1.73332	0.701189	9	9.83828	-0.838283	-0.828452	-0.651876	95.8872	90.3518	5.53535	5.17692	0.487237
		2018	25	19.5588	5.44121	1.48566	0.600641	9	9.62881	-0.628815	-1.61857	-1.23738	93.5985	90.8662	2.73232	4.66324	0.440689
		2019	14	18.3416	-4.34161	0.0380217	0.0129117	6	9.38861	-3.38861	-1.71129	-1.30609	97.1898	91.4678	5.72206	3.88381	0.370059
		2020	16	16.9855	-0.985532			8	9.11644	-1.11644			95.3564	92.1594	3.19704

## Sheet: Sheet2
		1967	284120	263280	267020	282020	300130	261170	300240	261160	290360	263300	273070	257020	263090	222120	264040	300260	284130	284010	282110	263180	290061	261140	284140	300240	263280	252120	252010	290380	263250
		1968	282050	261140	264180	284133	261160	267030	255020	267040	284110	284130	284010	282020	266030	300260	300240	257020	264140	265060	273030	251050	290070	284130	261170	273070	264010	284010	261160
		1969	284120	266100	273070	255060	272020	252010	257020	300260	263090	222120	261170	262000	263180	274020	284142	264100	290380	264110	284010	284120
		1970	267020	273070	283230	300240	261140	261120	264180	264270	290070	284210	284010	272020	300260	255020	252010	300130	282110	290120	266030	284070	284010	300240	252120	264010
		1971	300260	263210	263340	256010	282090	290380	300260	264110	261170	266030	257020	266100	284010	284070	300250	264010	252010	264180	263250
		1972	255060	264150	251070	263250	284130	233010	282050	255020	290390	262000	233020	290160	300040	263310	264010	267020	250030
		1973	284130	264250	282050	264150	300240	257020	252120	284133	266100	263180	290360	290120	261140	290030	290390	290070	263340	233020	251050	264220	284096	264010	252010	283110	261230	282110	290070	266030
		1974	251030	284130	255060	251070	222120	283090	284080	290030	263340	282050	263180	300260	264010	251020	283220	284010	261230	251030	284120
		1975	284134	266100	233020	282110	284090	284131	255060	284080	284096	284091	300240	284210	262000	263340	261140
		1976	284131	233020	290240	267020	273070	255060	284080	284133	284130	263340	282050	264010	300250	264250	283120	284131	284120	257020	251050
		1977	283180	266110	233020	284080	284133	273070	285030	300260	255060	263340	257020	282110	233010	300250	233020	255060
		1978	285040	284120	284096	300250	284133	273010	290030	262000	272020	255060	285040	252120	273030	267020	284131	263340	274020
		1979	273010	284141	283040	300250	262000	284070	284132	261030	282110	267020	233020	284133	290260	263200	282090	300250	251030
		1980	284070	264150	255060	252120	282050	282110	234070	268060	300270	300250	272020	284096	257020	300070	263310	290270	300250	261140	267020	262000	284120	251030
		1981	300260	290390	255060	257020	263200	282110	300250	290030	284170	290390	262000	273010	268040	285040	233020	300260	284133
		1982	261140	284133	284120	290150	264220	283120	300260	283110	266030	284070	263340	267020	284110	283110	257020	284096	255060	284210	263140	290390	300260	261140	284120	290030	284133
		1983	263310	233020	252120	284040	263090	264250	268060	283120	266010	282110	284110	284096	261140	273010	267020	284070	264220	263310	283090	283110	222120
		1984	252120	284100	261140	282030	273030	252120	300070	266100	256010	266030	263310	264150	285070	282110	300270	300260	284100	300250	263140
		1985	255060	284096	252120	263090	272020	282030	284142	263340	300260	264050	285050	233020	300250	300270	266030	300130	272020	264150	234010
		1986	300250	300260	290360	284010	284070	290260	263250	290240	263200	261160	255060	261120	261030	284096	284100	300260	272020	264220	290390	284130	300270	300250	266100	284130
		1987	264071	284010	284070	290380	264220	284130	284170	284110	284130	284210	263340	283090	268040	272020	261140
		1988	285050	300270	284170	268070	263180	272020	282110	265090	266100	284070	273010	284170	262000	268060	284121	282060	282030	285070
		1989	272020	284142	256010	300250	284080	284110	267020	283010	290070	266030	283090	300270	282110	290380	284080	290240	283120	252120
		1990	261170	282100	284010	283110	268060	282030	263280	300250	264180	233020	263340	300270
		1991	282090	284080	264220	263290	263340	233020	284130	233010	261030	267020	268060	266030	266100	283040	264180	264220	255060	300260	273083	260010	264071	272020	290380	300100
		1992	234011	284130	262000	300260	233020	284080	273083	272020	234010	282110	284170	267040	300250	284131	300260	263250	234010	272020
		1993	251050	284120	300250	264250	284080	272020	263350	264220	268060	232050	263340	273083	273030	263200	284170	252120	234010
		1994	260010	273010	261230	252140	222120	300260	284120	264010	284130	284080	263340	300250	264030	282110	252120	262000	263350	284080	268060
		1995	234000	252140	284130	267020	284202	282120	300250	264030	263310	263340	284080	256010	263340	263310	257030	283070
		1996	263200	282030	234011	290390	285070	300260	267020	283170	261170	272020	300250	262000	268060	284170	267010	261120	285020	282100	284080	284131	300125	300130
		1997	300250	284080	284130	283090	300260	290390	283260	282060	264050	283260	300250	263340	262000	284110	300270	255060
		1998	268030	285070	261170	284110	284080	285020	284130	300260	267020	261170	264010	255060	300250	300270	284110	282060	261030	283090	233020
		1999	255060	252120	290100	284120	284130	284110	300270	263340	233020	263350	273030	282030	264250	256010	263180	261140	300270	264180	261170	267020	264010	261030	300250	255060	262000	300260	282030
		2000	261030	282030	263310	284080	284110	282060	252120	285020	263350	261220	300260	284130	300250	263180	273030	263340	300060	284040	233020	251020	262000	266030	266100	285030	300060	300250	261140	234010	256010	255020	282030	233020	300260	284110	260010	282060
		2001	300250	300130	284080	284121	284130	284110	300100	261160	284120	252120	300250	262000	251020	233020	268030	261170	234011	284141	261140	233020	284096	252120	264090	284040	273030
		2002	300250	266100	284130	272020	300260	233020	256010	263100	251020	264180	273030	252140	267010	284080	252120	284090	252080	251070	263350	263340	252010	282060	256010	300260	284110	266100	290360	251020	233020
		2003	284080	284110	251020	273030	266100	268060	300250	263200	282110	284211	264200	234010	233020	264180	251020	284200	290360	252120	273030	284110	272020	282060	283110
		2004	284040	252010	234011	251020	282030	266030	264030	300260	283110	261140	290260	264160	234070	261170	263310	284120	273030	267040	268030	233020	263340	252120	284200	267020	255060	282060	285050	252080	264160	252010	300250	282110
		2005	266030	266020	300250	257030	233010	252070	233020	284130	273030	263340	234011	284130	290120	260010	252010	266030	233010	282110	284040	261160	252120	290360	284080	233020	264160	290380	252140	272020	300260
		2006	266030	284170	251070	273010	261230	261160	284040	252140	252010	233020	273030	267020	264260	272020	233010	300250	285070	273010	284200	263250	234010	252120	273030	284040	256010
		2007	252120	261160	284200	262000	263280	261170	252080	268060	290360	263340	268040	266030	222120	251070	300250	252120	255060	283040	261160	290360	300260	264260	233010
		2008	300090	267020	285070	300260	233020	256010	282090	273030	283110	290360	252070	300250	263340	266030	263250	260010	268060	284040	264160	268030	261170	267020	252070	282110	284040
		2009	300250	282090	233020	257020	263200	252010	273030	290120	300260	290240	264030	264050	251030	263180	284170	284040	261170	262000	290380	283110	263200	261230
		2010	263310	300230	273010	263250	262000	233020	290240	260010	261080	251020	267020	252140	290380	290270	284120	300070	284193	252120	300250	284170	284040	282090	251030	284130	263300
		2011	261170	268060	300260	257020	261140	262000	252010	266030	266100	222120	257030	282110	263300	284170	300260	252140	267020	266100	282090
		2012	252010	300240	290150	252120	284170	263340	264150	290390	261140	268060	266100	234010	300260	266030	290070	252010	267020	264270	252120	252080	261140	284120	251030	264230
		2013	284096	263250	252010	300120	260010	263090	261080	264250	300260	290200	252120	284090	263340	290260	263300	282060	261170	273030	263090	260010	290070	284305	251030	268040	252140
		2014	268060	290290	263340	290260	264180	283040	282110	273030	282050	252140	251020	233020	267020	300120	264050	284141	263300	262000	251030	263250	263180	263280	267020	261140	255060	282110	263340
		2015	272020	261140	263310	264030	252010	290390	266100	300260	268060	264270	283020	263170	222120	283110	282050	266100	273010	290360	233020	266030	300260
		2016	290260	300120	261170	290380	252120	282110	300130	222120	233020	268060	264030	290360	273010	233020	261170	290360	273010	266030
		2017	272020	264020	261230	256010	290240	282090	257030	261170	264050	233020	252120	273010	261140	300130	267020	263200	284096	222120	282080	300010	264100	262000	233020	260010
		2018	256010	267020	282050	268060	266030	260010	252120	290200	290240	290390	284096	233005	262000	252120	263250	300130	261140	261170	233020	263200	282090	267020	283120	273030	251002
		2019	284096	282060	283110	263090	252120	290250	233020	290240	282110	300260	233020	263310	300130	261080
		2020	263250	263310	233020	264230	282060	255060	282050	261080	263340	282060	300130	266030	255060	233020	273070	282050

## Sheet: Sheet3
		1967	390030	357060	345060	333060	342090	357040	343100	345040
		1968	344070	345033	345040	357010	353060	353010	353010
		1969	344070	345020	354020	355100	345040	345020	333030	390030	344040
		1970	345020	390030	345040	333030	343100
		1971	357110	357120	383010	360150	342090	358057	344020	344070
		1972	342080	390030	358020	352010	360160	358060	357070	357080	355100	355090	334070	353010	345040
		1973	344120	353010	352010	353020	357070	351080	342090	341040
		1974	342090	345040	360160	355100	351080	345060
		1975	341040	342090	344040
		1976	343100	344040	344020	360060	345040	344020	352010	331021
		1977	345040	341040	333060	360160	344020	342090	345040	344120	353010	351060	342090	345060	357120	360160
		1978	345040	353010	358060	344120
		1979	353050	357110	333060	345040	357140	360150	358060	353060
		1980	345040	333060	357091	345040	357120	390050	321050	333060	357010
		1981	344040	352020	353010	345040	333040	344040
		1982	353020	331030	341120	333060	344120
		1983	333060	357120	344120	333060	341040	345020
		1984	351020	344120	355100	357120	357110	345020	353010
		1985	344120	355020	343100	345020	351020	344020	341040	354010	352020
		1986	345020	354006	355100	331030	331020	333060	341130	357010
		1987	357010	355100	344040	344020	354006	390030	341040	345040	333060	345020	344100	342090
		1988	360160	357100	353010	334050	354006	344120	341040
		1989	355040	321050	344100	351080
		1990	355100	321050	343010	334120	357150	354006	355107	352020	360160	357110	351080	342110
		1991	334050	355100	353080	357120	358057	345020	353010	334050	345040	341040	357040
		1992	345040	357120	357110	357090	344070	345040
		1993	355100	353040	355130	331020	344100	352080	355160	352020	355100	341021	351080
		1994	341090	357090	345060	355100	357120	344040	341040	355100	357110	351020	345040	357030
		1995	345020	357110	357090	355040	360050	344070	357120	384010	353010	343100
		1996	344100	355100	357120	334070	345040	341090	331031	357120
		1997	343100	341040	360101	382070	344100	344020	352020	357110
		1998	382050	357040	357110	353060	344100	352020	357110	357120	345020	331021
		1999	344120	344100	352080	344070	342090	344040	344020
		2000	342110	355100	357090	354006	351080
		2001	360160	352020	385052	342110	355100	344020	344100	344040
		2002	352010	355100	344040	357110	352020	351080	342110	344020	352020	343100	342090
		2003	355100	344100	357070	354006	344020	334040	357120	352020	357110
		2004	344020	352010	344040	321050	357120	386011	342110	351080	344100	341090	344040	360050
		2005	351080	344020	353050	334050	344120	343020	353010	355100	360050	344100	341090
		2006	344040	345040	344120	344040	344100	355100	354020	345040	342110
		2007	344120	344020	344040	351080	344040	357110	352010	351050	344120
		2008	344020	351050	357120	351080	344120	352010	344040	344020	353060	358041	344100	352020	345040	351050	357110
		2009	344120	357120	345040	344020	353010	352020	357120	357091	357070	345040
		2010	352080	357040	351080	345070	354020	344020	345070	352080
		2011	352080	358057	383020	345020	344020	352090	357150	352080	331021	351080	344040	357040	345070
		2012	344020	357090	357120	345020	344020	351080	344100	351020	345020	345070	357091
		2013	343100	344040	354020	357120	344020	345070	344100	355100	342110	352090	341040
		2014	357120	384010	351020	345070	345020	342110	354006	344020	357090	344020
		2015	344090	355100	344100	344040	357090	352050	343100	360160	354006	345020	342110	353020	344040	331021	358020	345070	344020	343100	352090
		2016	354006	354020	343100	345040	344020	390130	352090	343100	357070
		2017	353010	344020	352090	357090	345020	345040	360160	344020	343100
		2018	357040	352090	345020	353050	344040	353010	344020	352090	343100
		2019	357090	354020	341040	352090	344020	345040
		2020	344020	360150	344040	345070	357090	343100	345020	353010

## Sheet: Sheet4
																																			282060
																																			260010
																																			284110
																																			300260
																																			233020				282110
																																			282030				300250
																																			255020				252010
		263250																																	256010		233020		264160	300260
		290380						266030																											234010		251020		252080	272020
		252010	261160					290070																										282030	261140		290360		285050	252140									263340
		252120	284010					282110																										300260	300250		266100		282060	290380									282110
		263280	264010					261230									284133																	262000	300060	273030	284110		255060	264160	256010		284040		263300			252140	255060
		300240	273070		264010			283110									290030				284130					300100								255060	285030	284040	300260		267020	233020	284040		282110		284130		264230	268040	261140
		284140	261170		252120			252010									284120				266100					290380								300250	266100	264090	256010	283110	284200	284080	273030	233010	252070		251030		251030	251030	267020
		261140	284130		300240			264010							251030		261140				300250					272020					300130			261030	266030	252120	282060	282060	252120	290360	252120	264260	267020	261230	282090		284120	284305	263280
		290061	290070		284010			284096							284120		300260	222120			300270					264071					300125			264010	262000	284096	252010	272020	263340	252120	234010	300260	261170	263200	284040		261140	290070	263180
		263180	251050	284120	284070			264220							262000		290390	283110			284130					260010					284131			267020	251020	233020	263340	284110	233020	261160	263250	290360	268030	283110	284170		252080	260010	263250
		282110	273030	284010	266030	263250		251050	284120		251050				267020		263140	283090	263140	234010	290390					273083			268060		284080		233020	261170	233020	261140	263350	273030	268030	284040	284200	261160	264160	290380	300250	282090	252120	263090	251030
		284010	265060	264110	290120	264180		233020	251030		257020				261140		284210	263310	300250	264150	264220		285070	252120		300260	272020		284080		282100		283090	264180	284040	284141	251070	252120	267040	282110	273010	283040	284040	262000	252120	266100	264270	273030	262000
		284130	264140	290380	282110	252010	250030	263340	261230		284120		274020	251030	300250	284133	255060	264220	284100	272020	272020		282030	283120		255060	234010	234010	263350		285020		261030	300270	300060	234011	252080	290360	273030	233010	285070	255060	268060	261170	284193	267020	267020	261170	263300
		300260	257020	264100	300130	264010	267020	290070	284010		284131	255060	263340	300250	290270	300260	284096	284070	300260	300130	300260		282060	290240		264220	263250	252120	262000	283070	261120	255060	282060	261140	263340	261170	284090	284200	284120	266030	300250	252120	260010	284040	300070	252140	252010	282060	284141
		264040	300240	284142	252010	300250	264010	290390	283220	261140	283120	233020	284131	282090	263310	233020	257020	267020	300270	266030	284100	261140	284121	284080		264180	300260	284170	252120	257030	267010	300270	284110	263180	273030	268030	252120	251020	263310	252010	233010	300250	263250	284170	284120	300260	290070	263300	264050
		222120	300260	274020	255020	284070	263310	290030	251020	263340	264250	300250	267020	263200	300070	285040	283110	273010	282110	300270	284096	272020	268060	290380		283040	284131	263200	282110	263310	284170	284110	300270	256010	263180	233020	284080	264180	261170	260010	272020	251070	266030	263180	290270	284170	266030	290260	300120
		263090	266030	263180	300260	284010	300040	261140	264010	262000	300250	233010	273030	290260	257020	268040	284110	261140	285070	300250	261030	268040	262000	282110		266100	300250	273030	264030	263340	268060	262000	300250	264250	300250	251020	267010	233020	234070	290120	264260	222120	263340	251030	290380	263300	300260	263340	267020
		257020	282020	262000	272020	266100	290160	290120	300260	284210	264010	282110	252120	284133	284096	273010	267020	284096	264150	233020	261120	283090	284170	300270	300270	266030	267040	273083	300250	256010	262000	263340	255060	282030	284130	262000	252140	234010	264160	284130	267020	266030	300250	264050	252140	282110	234010	284090	233020
		273070	284010	261170	284010	257020	233020	290360	263180	300240	282050	257020	285040	233020	272020	262000	263340	284110	263310	285050	255060	263340	273010	283090	263340	268060	284170	263340	263340	284080	300250	300250	264010	273030	300260	300250	273030	264200	290260	234011	273030	268040	252070	264030	267020	257030	266100	252120	251020
		263300	284130	222120	284210	266030	262000	263180	282050	284091	263340	263340	255060	267020	300250	290390	284070	282110	266030	264050	261160	284210	284070	266030	233020	267020	282110	232050	284080	263340	272020	283260	261170	263350	261220	252120	264180	284211	261140	263340	233020	263340	290360	290240	251020	222120	268060	290200	252140
		290360	284110	263090	290070	261170	290390	266100	263340	284096	284130	255060	272020	282110	300270	284170	266030	266010	256010	300260	263200	284130	266100	290070	264180	261030	234010	268060	284130	263310	261170	264050	267020	233020	263350	284120	251020	282110	283110	273030	252010	290360	283110	300260	261080	266100	261140	300260	282050
		261160	267040	300260	264270	264110	255020	284133	290030	284080	284133	300260	262000	261030	268060	290030	283110	283120	266100	263340	290240	284110	265090	283010	300250	233010	272020	264220	264010	264030	283170	282060	300260	263340	285020	261160	263100	263200	300260	284130	252140	268060	273030	290120	260010	266030	290390	264250	273030
		300240	255020	257020	264180	300260	282050	252120	284080	255060	284080	285030	290030	284132	234070	300250	300260	268060	300070	284142	263250	284170	282110	267020	263280	284130	273083	263350	284120	300250	267020	283260	284130	300270	252120	300100	256010	300250	264030	233020	284040	252080	282090	273030	290240	252010	264150	261080	282110
		261170	267030	252010	261120	290380	233010	257020	283090	284131	255060	273070	273010	284070	282110	282110	283120	264250	252120	282030	290260	284130	272020	284110	282030	233020	284080	272020	300260	282120	300260	290390	285020	284110	282060	284110	233020	268060	266030	252070	261160	261170	256010	252010	233020	262000	263340	263090	283040
		300130	261160	272020	261140	282090	284130	300240	222120	284090	273070	284133	284133	262000	282050	263200	264220	263090	273030	272020	284070	264220	263180	284080	268060	263340	233020	284080	222120	284202	285070	300260	284080	284130	284110	284130	300260	266100	282030	233010	261230	263280	233020	263200	262000	261140	284170	260010	264180
		282020	284133	255060	300240	256010	263250	264150	251070	282110	267020	284080	300250	300250	252120	257020	290150	284040	282030	263090	284010	290380	268070	300250	283110	263290	300260	264250	252140	267020	290390	283090	284110	284120	284080	284121	272020	273030	251020	257030	273010	262000	300260	257020	263250	257020	252120	300120	290260
		267020	264180	273070	283230	263340	251070	282050	255060	233020	290240	233020	284096	283040	255060	255060	284120	252120	261140	252120	290360	284070	284170	256010	284010	264220	262000	300250	261230	284130	234011	284130	261170	290100	263310	284080	284130	251020	234011	300250	251070	284200	285070	233020	273010	300260	290150	252010	263340
		263280	261140	266100	273070	263210	264150	264250	284130	266100	233020	266110	284120	284141	264150	290390	284133	233020	284100	284096	300260	284010	300270	284142	282100	284080	284130	284120	273010	252140	282030	284080	285070	252120	282030	300130	266100	284110	252010	266020	284170	261160	267020	282090	300230	268060	300240	263250	290290
		284120	282050	284120	267020	300260	255060	284130	251030	284134	284131	283180	285040	273010	284070	300260	261140	263310	252120	255060	300250	264071	285050	272020	261170	282090	234011	251050	260010	234000	263200	300250	268030	255060	261030	300250	300250	284080	284040	266030	266030	252120	300090	300250	263310	261170	252010	284096	268060
		1967	1968	1969	1970	1971	1972	1973	1974	1975	1976	1977	1978	1979	1980	1981	1982	1983	1984	1985	1986	1987	1988	1989	1990	1991	1992	1993	1994	1995	1996	1997	1998	1999	2000	2001	2002	2003	2004	2005	2006	2007	2008	2009	2010	2011	2012	2013	2014
[truncated: 6 more columns]

## Sheet: Sheet5




																																											357110
												360160																															351050
							345040					357120																															345040			345070
							353010					345060										342090			342110				357030										360050				352020			357040
							334070					342090										344100			351080	357040		351080	345040								342090		344040	341090			344100			344040	357091	341040
							355090					351060										345020			357110	341040		341021	351020	343100			331021				343100		341090	344100			358041	345040		351080	345070	352090	344020
				344040			355100					353010			357010					352020		333060			360160	345040		355100	357110	353010			345020				352020	357110	344100	360050	342110	344120	353060	357070		331021	345020	342110	357090
		345040		390030		344070	357080	341040			331021	344120		353060	333060					354010	357010	345040			352020	334050		352020	355100	384010	357120	357110	357120			344040	344020	352020	351080	355100	345040	351050	344020	357091	352080	352080	351020	355100	344020
		343100	353010	333030		344020	357070	342090			352010	345040		358060	321050				353010	341040	341130	341040	341040		355107	353010		355160	341040	357120	331031	352020	357110	344020		344100	342110	357120	342110	353010	354020	352010	344040	357120	345070	357150	344100	344100	354006
		357040	353010	345020		358057	358060	351080	345060		344020	342090		360150	390050	344040		345020	345020	344020	333060	390030	344120		354006	345020	345040	352080	344040	344070	341090	344020	352020	344040		344020	351080	334040	386011	343020	355100	357110	352010	352020	344020	352090	351080	345070	342110
		342090	353060	345040	343100	342090	360160	357070	351080		345040	344020		357140	357120	333040	344120	341040	357110	351020	331020	354006	354006		357150	358057	344070	344100	357120	360050	345040	344100	344100	342090	351080	355100	352020	344020	357120	344120	344100	344040	344120	353010	354020	344020	344020	344020	345020
		333060	357010	355100	333030	360150	352010	353020	355100		360060	360160	344120	345040	345040	345040	333060	333060	357120	345020	331030	344020	334050	351080	334120	357120	357090	331020	355100	355040	334070	382070	353060	344070	354006	342110	357110	354006	321050	334050	344040	351080	351080	344020	345070	345020	345020	357120	345070
		345060	345040	354020	345040	383010	358020	352010	360160	344040	344020	333060	358060	333060	357091	353010	341120	344120	355100	343100	355100	344040	353010	344100	343010	353080	357110	355130	345060	357090	357120	360101	357110	352080	357090	385052	344040	357070	344040	353050	344120	344040	357120	345040	351080	383020	357120	354020	351020
		357060	345033	345020	390030	357120	390030	353010	345040	342090	344040	341040	353010	357110	333060	352020	331030	357120	344120	355020	354006	355100	357100	321050	321050	355100	357120	353040	357090	357110	355100	341040	357040	344100	355100	352020	355100	344100	352010	344020	345040	344020	351050	357120	357040	358057	357090	344040	384010
		390030	344070	344070	345020	357110	342080	344120	342090	341040	343100	345040	345040	353050	345040	344040	353020	333060	351020	344120	345020	357010	360160	355040	355100	334050	345040	355100	341090	345020	344100	343100	382050	344120	342110	360160	352010	355100	344020	351080	344040	344120	344020	344120	352080	352080	344020	343100	357120
		1967	1968	1969	1970	1971	1972	1973	1974	1975	1976	1977	1978	1979	1980	1981	1982	1983	1984	1985	1986	1987	1988	1989	1990	1991	1992	1993	1994	1995	1996	1997	1998	1999	2000	2001	2002	2003	2004	2005	2006	2007	2008	2009	2010	2011	2012	2013	2014
[truncated: 6 more columns]

## Sheet: Sheet6
	Global Volcanism Program - Volcanoes of the World 4.9.4		Downloaded on 13 May 2021 at 06:57 PM
	Volcano Number	Volcano Name	Area of Activity	Start Year	End Year	Latitude	Longitude
	210010	West Eifel Volcanic Field	Strohn, Pulvermaar	-8300		50.17	6.85
	210020	Chaine des Puys	Montcineyre, Estivadoux, Pavin	-4040		45.775	2.97
	210040	Calatrava Volcanic Field	Columba	-3600		38.87	-4.02
	211003	Vulsini		-104		42.6	11.93
	211004	Colli Albani		-114		41.73	12.7
	211010	Campi Flegrei	Monte Nuovo	1538	1538	40.827	14.139
	211020	Vesuvius	Summit and upper flanks	1913	1944	40.821	14.426
	211030	Ischia	Arso	1302	1302	40.73	13.897
	211031	Palinuro		-8040		39.48	14.83
	211040	Stromboli	Summit craters and Sciara del Fuoco	1934	2021	38.789	15.213
	211042	Lipari	Pelato (Forgia Vecchia, Rocche Rossi)	1230		38.49	14.933
	211050	Vulcano		1968		38.404	14.962
	211060	Etna	New Southeast Crater (NSEC)	2013	2021	37.748	14.999
	211070	Campi Flegrei del Mar di Sicilia	Pinne	1911		37.1	12.7
	211071	Pantelleria	South of Pantelleria	1891		36.77	12.02
	211080	Marsili		-1050		39.284	14.399
	212020	Methana		1922		37.615	23.336
	212030	Milos	SE Mílos, east of Fyriplaka tuff ring	140		36.699	24.439
	212040	Santorini	Nea Kameni (Liatsikas dome)	1950	1950	36.404	25.396
	212050	Nisyros	Polyvotis Micros	1888		36.586	27.16
	213002	Hasan Dagi		-6750		38.13	34.17
	213004	Acigol-Nevsehir		-2080		38.537	34.621
	213010	Erciyes Dagi		253		38.531	35.447
	213020	Nemrut Dagi		1692		38.654	42.229
	213030	Tenduruk Dagi		1855		39.356	43.874
	213040	Ararat	Upper northern flank	1840		39.7	44.3
	214010	Elbrus		50		43.351	42.442
	214020	Kazbek		-750		42.7	44.5
	214070	Ghegham Volcanic Ridge	North part of eastern cone cluster	-1900		40.283	45
	214080	Vaiyots-Sar		753		39.797	45.497
	214090	Porak		-740		40.028	45.74
	214100	Tskhouk-Karckar		-3000		39.742	45.992
	221010	Tair, Jebel at		2007	2008	15.55	41.83
	221020	Zubair Group	Jadid Island	2013	2013	15.05	42.18
	221041	Dallol	Dallol crater	2011	2011	14.242	40.3
	221060	Alu-Dalafilla	W and NW of Dalaffilla	2008	2008	13.793	40.553
	221080	Erta Ale		1967	2020	13.6	40.67
	221100	Dubbi		1900		13.579	41.809
	221101	Nabro		2011	2012	13.37	41.7
	221112	Alayta		1915		12.888	40.573
	221113	Dabbahu	NE flank (Da'Ure)	2005	2005	12.595	40.48
	221115	Manda Hararo		2009	2009	12.17	40.82
	221122	Manda-Inakir	Kammourta	1928		12.38	42.2
	221126	Ardoukoba		1978	1978	11.58	42.47
	221141	Dama Ali	Volcano Uncertain	1631		11.28	41.63
	221160	Ayelu		1928		10.082	40.702
	221170	Adwa		1928		10.063	40.831
	221190	Fentale	Caldera floor and SW flank	1820		8.975	39.93
	221200	Kone	East margin of Gariboldi caldera	1820		8.788	39.701
	221250	Tullu Moye	Wonji fault belt, SE of Lake Koka	1900		8.159	39.137
	221270	Aluto		-50		7.77	38.78
	221290	Corbetti Caldera		1957	1964	7.193	38.39
	222010	Central Island	East side of Central Island	1974	1974	3.496	36.04
	222020	South Island		1888		2.63	36.6
	222030	Barrier, The	North flank (Teleki)	1921		2.32	36.57
	222040	Namarunu	Lower eastern flanks	-6550		1.98	36.43
	222051	Emuruangogolak	South caldera rim	1910		1.5	36.33
	222052	Silali	Upper east flank	-5050		1.15	36.23
	222053	Paka		-7550		0.92	36.18
	222060	Menengai		-6050		-0.2	36.07
	222090	Olkaria	Ololbutot	1770		-0.904	36.292
	222100	Longonot	Northern flank	1863		-0.914	36.446
	222120	Lengai, Ol Doinyo	North Crater	2017	2021	-2.764	35.914
	222130	Chyulu Hills	Shaitani and Chaimu	1855		-2.68	37.88
	222160	Meru	Ash Cone	1910	1910	-3.25	36.75
	222161	Igwisi Hills	NE Volcano	-10450		-4.889	31.933
	222164	Ngozi		1450		-8.989	33.554
	222166	Rungwe		1250		-9.135	33.668
	222170	Kyejo	Sarabwe and Fiteko	1800		-9.229	33.792
	223001	Fort Portal		-2120		0.7	30.25
	223020	Nyamulagira	Summit caldera	2018	2021	-1.408	29.2
	223030	Nyiragongo		2002	2021	-1.52	29.25
	223040	Karisimbi		-8050		-1.506	29.45
	223050	Visoke	11 km north of summit (Mugogo)	1957	1957	-1.458	29.485
	224004	Santa Isabel	SE flank	1923		3.588	8.762
	224010	Cameroon	Upper SW flank (4000, 3470-3220, 2750 m)	2000	2000	4.203	9.17
	224030	Oku Volcanic Field	Lake Nyos	1986	1986	6.25	10.5
	225030	Marra, Jebel	Deriba caldera	-2000		12.95	24.27
	225050	Meidob Volcanic Field	Vent VF 214	-2950		15.32	26.47
	225060	Bayuda Volcanic Field		850		18.33	32.75
	231001	Harrat Ash Shamah	Jabal Druse	1850		32.333	37.583
	231020	Uwayrid, Harrat	Hala-'l-Bedr, Hala-'l-'Ishqua or both	640		27.08	37.25
	231040	Lunayyir, Harrat		1000		25.17	37.75
	231060	Khaybar, Harrat	Harrat Lali	650		25.5	40
	231070	Rahat, Harrat	Near Madinah	1292		23.08	39.78
	231080	Yar, Jabal		1810		17.05	42.83
	231090	Arhab, Harra of	South flank of Kaulet Hattab	500		15.63	44.08
	231110	Haylan, Jabal	West of Sirwan	-1200		15.4	45.1
	231120	Dhamar, Harras of	Near the town of Dhamar	1937		14.57	44.67
	231160	Sawad, Harra Es-		1253		13.58	46.12
	231180	Bir Borhut		950		15.515	50.935
	232010	Damavand		-5350		35.951	52.109
	232050	Taftan		1993		28.6	61.13
	233005	Mayotte	About 50 km E of the eastern tip of Mayotte Island	2018	2019	-12.83	45.17
	233010	Karthala	Chahalé crater	2007	2007	-11.75	43.38
	233014	Itasy Volcanic Field		-6050		-19.033	46.7
	233020	Fournaise, Piton de la		2020	2020	-21.244	55.708
	234000	Boomerang Seamount		1995		-37.721	77.825
	234002	St. Paul	SW flank (near Cape West)	1793		-38.72	77.53
	234010	Heard	Mawson Peak	2012	2021	-53.106	73.513
	234011	McDonald Islands		2005		-53.03	72.6
	234070	Marion Island	South side of island	2004	2004	-46.9	37.75
	241010	Kaikohe-Bay of Islands	Te Puke	400		-35.3	173.9
	241020	Auckland Volcanic Field	Rangitoto	1350		-36.9	174.87
	241021	Mayor Island	South end of caldera, Taratimi Bay	-5060		-37.28	176.25
	241030	Taranaki		1854		-39.3	174.07
	241040	Whakaari/White Island	1978/90 Crater Complex	2019	2019	-37.52	177.18
	241050	Okataina	Waimangu (Raupo Pond crater)	1981	1981	-38.12	176.5
	241060	Reporoa	Waiotapu thermal area	1180		-38.42	176.33
	241061	Maroa	Orakeikorako	180		-38.42	176.08
	241070	Taupo	East Lake Taupo (Horomatangi Reefs)	260		-38.82	176
	241080	Tongariro	Upper Te Maari Craters	2012	2012	-39.157	175.632
	241100	Ruapehu		2007	2007	-39.28	175.57
	241120	Rumble IV		1966	1966	-36.13	178.05
	241130	Rumble III		2008		-35.745	178.478
	241140	Healy	Healy caldera	1360		-35.004	178.973
	242005	Havre Seamount		2012	2012	-31.08	-179.033
	242010	Curtis Island	5-6 km NNE of Curtis Island	2009	2009	-30.543	-178.556
	242021	Macauley	22 km NNE of Macauley Island	1887		-30.21	-178.475
	242030	Raoul Island	Green Lake crater	2006	2006	-29.27	-177.92
	242050	Monowai		2012	2012	-25.887	-177.188
	243010	Unnamed		1932		-21.338	-175.65
	243030	Unnamed		2017	2017	-20.852	-175.55
	243040	Hunga Tonga-Hunga Ha'apai		2014	2015	-20.536	-175.382
	243050	Fonuafo'ou		1936		-20.32	-175.42
	243060	Tofua		2015	2021	-19.75	-175.07
	243061	Kao		1847		-19.668	-175.016
	243070	Lateiki		2019	2019	-19.18	-174.87
	243080	Home Reef		2006	2006	-18.992	-174.775
	243090	Late	NE flank	1854		-18.806	-174.65
	243091	Unnamed		2001	2001	-18.325	-174.365
	243100	Fonualei		1974		-18.023	-174.317
	243102	Curacoa	13 km north of Tafahi	1979		-15.62	-173.67
	243110	Niuafo'ou	NE part of caldera lake (Vai Lahi)	1985	1985	-15.6	-175.63
	243120	Tafu-Maka	Maka	2008	2008	-15.37	-174.23
	243130	West Mata	Prometheus and Hades vents	2008	2009	-15.1	-173.75
	244000	Vailulu'u	West side of caldera (Nafanua)	2003		-14.215	-169.058
	244010	Ofu-Olosega	Submarine vent 3 km SE of Olosega	1866	1866	-14.175	-169.618
	244020	Tutuila	Cones E of Pava'ia'i Village	440		-14.295	-170.7
	244040	Savai'i	Matavanu (north flank 402 m)	1905	1911	-13.612	-172.525
	245010	Taveuni	Near South Cape	1550		-16.82	-179.97
	245030	Nabukelevu	Dome NW of summit	1660		-19.12	177.98
	250010	St. Andrew Strait	Tuluman	1953	1957	-2.38	147.35
	250020	Baluan		1931		-2.57	147.28
	250030	Central Bismarck Sea		1972	1972	-3.03	147.78
	251001	Blup Blup		1830		-3.507	144.605
	251002	Kadovar		2018	2021	-3.608	144.588
	251010	Bam		1960	1960	-3.613	144.818
	251020	Manam		2014	2021	-4.08	145.037
	251030	Karkar		2014	2014	-4.649	145.964
	251050	Long Island	E-W fissure NNE of Motmot Island	1993	1993	-5.358	147.12
	251070	Ritter Island		2007	2007	-5.519	148.115
	252010	Langila		2015	2021	-5.525	148.42
	252040	Dakataua	Makalia	1895		-5.094	150.094
	252070	Krummel-Garbuna-Welcker		2008	2008	-5.416	150.027
	252080	Witori	Pago	2012	2012	-5.576	150.516
	252100	Hargy	Galloseulo	950		-5.33	151.1
	252110	Bamus		1886		-5.2	151.23
	252120	Ulawun		2019	2019	-5.05	151.33
	252130	Lolobau	East flank (Sili)	1911	1912	-4.92	151.158
	252140	Rabaul	Tavurvur	2014	2014	-4.271	152.203
	252150	Tavui		-4946		-4.12	152.2
	253010	Lamington		1951	1956	-8.95	148.15
	253030	Victory		1890	1935	-9.2	149.07
	253040	Waiowa		1943	1944	-9.57	149.075
	253060	Dawson Strait Group	Oiau	1350		-9.62	150.88
	254020	Ambitle	East side of caldera	-350		-4.08	153.65
	255010	Balbi	Crater B ?	1825		-5.92	154.98
	255011	Billy Mitchell		1580		-6.092	155.225
	255020	Bagana		2000	2021	-6.137	155.196
	255030	Loloru		-1050		-6.52	155.62
	255050	Simbo	Ngusuna crater?	1910		-8.292	156.52
	255060	Kavachi		2020	2021	-8.991	157.979
	255070	Savo		1865		-9.13	159.82
	256010	Tinakula		2018	2021	-10.386	165.804
	257010	Suretamatai	NW flank	1965	1966	-13.8	167.47
	257020	Gaua	Mt. Garat	2011	2011	-14.27	167.5
	257021	Mere Lava		1606		-14.45	168.05
	257030	Ambae		2017	2018	-15.389	167.835
	257040	Ambrym	Benbow and Marum	2008	2018	-16.25	168.12
	257050	Lopevi		2014	2014	-16.507	168.346
	257060	Epi	Epi B	2004	2004	-16.68	168.37
	257070	Kuwae	Karua	1980		-16.829	168.536
	257090	Traitor's Head	Four submarine vents N of Erromango	1959		-18.754	169.238
	257100	Yasur		1774	2021	-19.532	169.447
	258001	Eastern Gemini Seamount		1996	1996	-20.98	170.28
	258010	Matthew Island		1976		-22.33	171.32
	258020	Hunter Island		1983		-22.4	172.05
	259010	Newer Volcanics Province	Mt. Gambier	-2900		-37.77	142.5
	260010	Barren Island		2018	2021	12.278	93.858
	261020	Seulawah Agam	NNE flank (van Heutsz crater)	1839	1839	5.448	95.658
	261030	Peuet Sague		2000	2000	4.903	96.289
	261050	Telong, Bur ni		1937		4.769	96.821
	261070	Singkut		1881		3.248	98.501
	261080	Sinabung		2020	2021	3.17	98.392
	261120	Sorikmarapi		1996		0.686	99.539
	261130	Talakmau		1937		0.079	99.98
	261140	Marapi	Verbeek Crater	2018	2018	-0.38	100.474
	261150	Tandikat-Singgalang	Tandikat	1924	1924	-0.39	100.331
	261160	Talang		2007	2007	-0.979	100.681
	261170	Kerinci		2018	2020	-1.697	101.264
	261180	Sumbing		1921	1921	-2.414	101.728
	261220	Kaba		2000	2000	-3.522	102.615
	261230	Dempo		2017	2017	-4.016	103.121
	261251	Ranau		1903	1903	-4.871	103.925
	261270	Suoh	Pematang Bata	1933	1933	-5.25	104.27
	262000	Krakatau		2018	2020	-6.102	105.423
	263040	Perbakti-Gagak	Kawah Parabakti	1939		-6.75	106.7
	263050	Salak	Kawah Cikaluwung Putri	1938		-6.72	106.73
	263060	Gede-Pangrango		1957	1957	-6.77	106.965
	263090	Tangkuban Parahu		2019	2019	-6.77	107.6
	263100	Papandayan	Kawah Baru, Kawah Nangklak	2002	2002	-7.32	107.73
	263130	Guntur		1887		-7.143	107.84
	263140	Galunggung		1984	1984	-7.25	108.058
	263170	Cereme		2015	2015	-6.895	108.408
	263180	Slamet		2014	2014	-7.242	109.208
	263200	Dieng Volcanic Complex	Sileri Crater	2018	2018	-7.2	109.879
	263210	Sundoro		1971	1971	-7.3	109.992
	263220	Sumbing		1730		-7.384	110.07
	263240	Merbabu		1797		-7.454	110.44
	263250	Merapi		2020	2021	-7.54	110.446
	263251	Muria	East flank (Gunung Bambang)	-160		-6.62	110.88
	263260	Lawu		1885	1885	-7.625	111.192
	263270	Wilis		1641		-7.808	111.758
	263280	Kelut		2014	2014	-7.93	112.308
	263290	Arjuno-Welirang	Gunung Welirang	1991		-7.733	112.575
	263291	Penanggungan		200		-7.616	112.62
	263300	Semeru	Jonggring Seloko	2014	2021	-8.108	112.922
	263310	Tengger Caldera		2020	2020	-7.942	112.95
	263320	Lamongan		1953	1953	-7.981	113.341
	263330	Iyang-Argapura		1597		-7.97	113.57
	263340	Raung		2021	2021	-8.119	114.056
	263350	Ijen	Kawah Ijen	2002	2002	-8.058	114.242
	264010	Batur		1999	2000	-8.242	115.375
	264020	Agung	Summit crater	2017	2019	-8.343	115.508
	264030	Rinjani	Barujari Crater	2016	2016	-8.42	116.47
	264040	Tambora	NE part of caldera floor	1967		-8.25	118
	264050	Sangeang Api	Summit crater	2017	2020	-8.2	119.07
	264071	Ranakah	Anak Ranakah	1991		-8.62	120.52
	264080	Inierie	NE side (Wolo Bobo)	-8050		-8.875	120.95
	264090	Inielika	Summit crater complex	2001	2001	-8.73	120.98
	264100	Ebulobo		2017	2017	-8.817	121.191
	264110	Iya		1971	1971	-8.891	121.641
	264140	Kelimutu	Tiwu Nua Muri	1968	1968	-8.77	121.82
	264150	Paluweh	Rokatenda	2012	2013	-8.32	121.708
	264160	Egon		2008	2008	-8.676	122.455
	264180	Lewotobi		2014	2014	-8.542	122.775
	264200	Leroboleng		2003	2003	-8.365	122.833
	264220	Iliboleng		1993	1993	-8.342	123.258
	264230	Lewotolok		2020	2021	-8.274	123.508
	264250	Iliwerung	Hobal (submarine vent on SE flank)	2013	2013	-8.53	123.57
	264260	Tara, Batu		2007	2015	-7.791	123.585
	264270	Sirung		2015	2015	-8.508	124.13
	265030	Gunungapi Wetar		1699		-6.642	126.65
	265040	Wurlali		1892	1892	-7.125	128.675
	265050	Teon		1904		-6.976	129.144
	265060	Nila	East flank	1968	1968	-6.73	129.5
	265070	Serua	Summit and south flank	1921		-6.312	130.017
	265090	Banda Api	Summit, north and south flanks	1988	1988	-4.523	129.881
	266010	Colo	Gunung Colo	1983	1983	-0.162	121.601
	266020	Ambang		2005		0.75	124.42
	266030	Soputan		2020	2020	1.112	124.737
	266040	Riendengan-Sempu		1819		1.13	124.758
	266100	Lokon-Empung	Tompaluan	2015	2015	1.358	124.792
	266110	Mahawu		1977		1.352	124.865
	266130	Tangkoko-Duasudara	Batu Angus	1880		1.518	125.185
	267010	Ruang		2002	2002	2.3	125.37
	267020	Karangetang		2018	2021	2.781	125.407
	267030	Banua Wuhu		1968	1968	3.138	125.491
	267040	Awu		2004	2004	3.689	125.447
	268010	Dukono	Malupang Magiwe and Malupang Warirang	1933	2021	1.693	127.894
	268030	Ibu		2008	2021	1.488	127.63
	268040	Gamkonora		2013	2013	1.38	127.53
	268060	Gamalama		2018	2018	0.8	127.33
	268063	Moti		1774		0.454	127.411
	268070	Makian		1988	1988	0.32	127.4
	271011	Parker		1640	1641	6.113	124.892
	271020	Matutum		1911		6.37	125.07
	271031	Leonard Range		120		7.382	126.047
	271040	Makaturing		1882		7.644	124.317
	271060	Ragang		1916		7.691	124.507
	271070	Musuan		1886		7.877	125.068
	271080	Camiguin	Upper NE flank of Hibok-Hibok	1948	1953	9.203	124.673
	272020	Kanlaon		2017	2017	10.412	123.132
	272050	Cabalían		1820		10.285	125.218
	272070	Mahagnao		1895		10.882	124.888
	272080	Biliran		1939		11.523	124.535
	273010	Bulusan		2017	2017	12.769	124.056
	273030	Mayon		2018	2019	13.257	123.685
	273041	Iriga		1628		13.458	123.451
	273042	Isarog		-3500		13.658	123.38
	273050	Banahaw	Banáhao	1909		14.07	121.48
	273060	San Pablo Volcanic Field	Sampaloc Lake	1350		14.12	121.3
	273070	Taal		2020	2020	14.002	120.993
	273081	Mariveles		-2050		14.527	120.482
	273083	Pinatubo	Caldera floor	1993	1993	15.13	120.35
	273088	Ambalatungan Group	Mt. Binuluan	1952		17.32	121.1
	273090	Cagua		1860		18.222	122.123
	274010	Camiguin de Babuyanes	SW flank	1857		18.83	121.86
	274020	Didicas	NNE side	1978	1978	19.077	122.202
	274030	Babuyan Claro	Smith volcano	1924		19.523	121.94
	274050	Unnamed		1854		20.33	121.75
	274060	Iraya		1454		20.469	122.01
	275001	Hainan Volcanic Field	Nansheling ridge	1933	1933	19.905	110.229
	275060	Cendres, Ile des		1923	1923	10.158	109.014
	275070	Veteran		1928		9.83	109.05
	275080	Popa		-442		20.92	95.25
	275110	Tengchong	Dayingshan or Heikongshan	1609		25.23	98.5
	281031	Kueishantao		1853	1853	24.841	121.953
	281032	Tatun Volcanic Group	Shamao	648		25.178	121.553
	282010	Submarine Volcano NNE of Iriomotejima		1924		24.57	123.93
	282020	Io-Torishima		1968	1968	27.881	128.223
	282021	Yokoatejima		1835		28.797	128.997
	282030	Suwanosejima	O-take	2004	2021	29.638	129.714
	282040	Nakanoshima	On-take	1949		29.859	129.857
	282043	Kuchinoshima		1190		29.968	129.926
	282050	Kuchinoerabujima		2020	2020	30.443	130.217
	282060	Kikai		2020	2020	30.793	130.305
	282070	Ata	Kaimon	1615		31.22	130.57
	282080	Aira	Minamidake summit crater	2017	2021	31.593	130.657
	282081	Yonemaru-Sumiyoshiike	Yonemaru	-6200		31.771	130.592
	282090	Kirishimayama	Shinmoedake	2018	2018	31.934	130.862
	282091	Fukue	Hino-take	-400		32.657	128.849
	282100	Unzendake	Fugen-dake	1996	1996	32.761	130.299
	282110	Asosan		2019	2020	32.884	131.104
	282120	Kujusan	Hosho lava dome (east flank)	1995	1996	33.086	131.249
	282130	Yufu-Tsurumi		867	867	33.282	131.39
	283001	Abu	Kasa-yama	-6850		34.5	131.6
	283002	Sanbesan		650		35.141	132.622
	283010	Izu-Tobu	Teishi-kaikyu (4 km NE of Ito City)	1989	1989	34.9	139.098
	283020	Hakoneyama		2015	2015	35.233	139.021
	283030	Fujisan		1854	1855	35.361	138.728
	283031	Yokodake	Yoko-dake	1200		36.087	138.32
	283040	Ontakesan	Summit crater	2014	2014	35.893	137.48
	283050	Hakusan	Midoriga-ike	1659	1659	36.155	136.771
	283060	Norikuradake		-50		36.106	137.554
	283070	Yakedake	SE flank (Azusa-gawa)	1995	1995	36.227	137.587
	283080	Midagahara		1858		36.571	137.59
	283090	Niigata-Yakeyama	Upper east flank	1998		36.921	138.036
	283100	Myokosan		-750		36.891	138.114
	283110	Asamayama		2019	2019	36.406	138.523
	283120	Kusatsu-Shiranesan	Motoshiranesan	2018	2018	36.618	138.528
	283122	Harunasan	Futatsu-dake	550		36.477	138.851
	283130	Akagisan		1938		36.56	139.193
	283131	Hiuchigatake	Miike-dake lava dome	1544		36.955	139.285
	283140	Nikko-Shiranesan	Shirane-san	1952	1952	36.799	139.376
	283141	Nantaisan		-9540		36.765	139.491
	283142	Omanago Group	Mitsu-dake	-3050		36.795	139.507
	283143	Takaharayama	Fuji-san lava dome	-4570		36.9	139.777
	283150	Nasudake	Chausu-dake (west side)	1963	1963	37.125	139.963
	283151	Numazawa		-3400		37.444	139.566
	283160	Bandaisan	Kobandai	1888	1888	37.601	140.072
	283170	Adatarayama	Numanotaira	1996	1996	37.647	140.281
	283180	Azumayama	Issaikyo (Oana)	1977	1977	37.735	140.244
	283190	Zaozan [Zaosan]	Okama	1940	1940	38.144	140.44
	283200	Naruko		837		38.729	140.734
	283210	Kurikomayama		1950		38.961	140.788
	283220	Chokaisan	E side of Shinzan, W of Kojin-yama	1974	1974	39.099	140.049
	283230	Akita-Komagatake	Me-dake	1970	1971	39.761	140.799
	283240	Iwatesan		1934	1935	39.853	141.001
	283250	Hachimantai		-5350		39.958	140.854
	283260	Akita-Yakeyama	Kare-numa	1997	1997	39.964	140.757
	283262	Megata		-2050		39.95	139.73
	283270	Iwakisan		1863		40.656	140.303
	283271	Towada	Goshikiiwa (NE rim Nakanoumi crater)	915		40.51	140.88
	283280	Hakkodasan	SW flank of O-dake (Jigoku-numa)	1550		40.659	140.877
	283290	Osorezan		1787		41.279	141.12
	284010	Izu-Oshima	Mihara-yama (1987 summit crater)	1990	1990	34.724	139.394
	284011	Toshima	Kajiana crater	-4550		34.52	139.279
	284020	Niijima	Mukai-yama	886		34.397	139.27
	284030	Kozushima	Tenjo-san	838		34.219	139.153
	284040	Miyakejima		2010	2010	34.094	139.526
	284041	Mikurajima	Tsubunegamori & Yasukajigamori domes	-4100		33.874	139.602
	284050	Hachijojima		1707		33.137	139.766
	284060	Aogashima	Maru-yama, SW part of Ikenosawa crater	1780	1785	32.458	139.759
	284070	Myojinsho	Myojinsho	1988	1988	31.888	139.918
	284080	Sumisujima		2005	2005	31.44	140.051
	284090	Izu-Torishima		2013	2013	30.484	140.303
	284091	Sofugan		1975		29.794	140.342
	284096	Nishinoshima		2019	2020	27.247	140.874
	284100	Kaitoku Seamount		1986	1986	26.127	141.102
	284110	Kita-Ioto	Funka-Asane	2003	2003	25.424	141.284
	284120	Ioto	Asodai	2012	2012	24.751	141.289
	284121	Kita-Fukutokutai	24.443 N, 141.378 E	2001	2001	24.417	141.417
	284130	Fukutoku-Oka-no-Ba		2010	2010	24.285	141.481
	284131	Minami-Hiyoshi		1996	1996	23.5	141.935
	284132	Nikko		1979		23.078	142.326
	284133	Fukujin		1982		21.93	143.47
	284134	Kasuga 1	21.78 N 143.71 E	1975		21.765	143.71
	284140	Farallon de Pajaros	SW of Uracas (Makhahnas seamount)	1967	1967	20.546	144.893
	284141	Ahyi		2014	2014	20.42	145.03
	284142	Supply Reef	Volcano Uncertain: NW of Supply Reef (~20.3 N, 144.9E)	1989	1989	20.13	145.1
	284150	Asuncion		1924		19.671	145.406
	284160	Agrigan		1917		18.77	145.67
	284170	Pagan	North Pagan	2012	2012	18.13	145.8
	284180	Alamagan		1887		17.6	145.83
	284190	Guguan		1901		17.307	145.845
	284193	South Sarigan Seamount		2010	2010	16.58	145.78
	284200	Anatahan		2007	2008	16.35	145.67
	284202	Ruby		1995	1995	15.62	145.57
	284210	Esmeralda Bank		1987		15	145.25
	284211	NW Rota-1	Upper South flank (Brimstone Pit)	2003	2010	14.601	144.775
	284305	Mariana Back-Arc Segment at 15.5°N	Along a 10 km N-S line at 15.4°N	2013	2015	15.406	144.506
	285010	Oshima-Oshima	Nishi-yama	1790		41.51	139.367
	285011	Esan		1874		41.805	141.166
	285020	Hokkaido-Komagatake		2000	2000	42.063	140.677
	285030	Toya	Usu N flank (Kompira-yama & W Nishi-yama)	2000	2001	42.544	140.839
	285031	Niseko		-4900		42.875	140.659
	285032	Yoteizan	NW flank (Hangetsu-ko)	-1050		42.827	140.812
	285034	Kuttara	West flank (Jigoku-dani)	1820		42.491	141.16
	285040	Shikotsu	Tarumai	1981	1981	42.688	141.38
	285041	Rishirizan		-5830		45.179	141.242
	285050	Tokachidake	1962-II Crater	2004	2004	43.418	142.686
	285060	Taisetsuzan	Asahi-dake	1739		43.664	142.854
	285061	Maruyama	Maru-yama (No. 1 crater)	1898	1898	43.418	143.031
	285070	Akan	Me-Akan (Ponmachineshiri)	2008	2008	43.384	144.013
	285080	Kussharo	Atosanupuri	1320		43.615	144.427
	285081	Mashu	Kamuinupuri	1080		43.572	144.561
	285082	Rausudake		1800		44.076	145.122
	285083	Tenchozan		100		44.044	145.086
	285090	Shiretoko-Iozan	NW flank	1935	1936	44.133	145.161
	290010	Tomariyama [Golovnin]	Eastern explosion crater	1848		43.844	145.504
	290020	Raususan [Mendeleev]		1900		43.979	145.733
	290030	Chachadake [Tiatia]		1982	1982	44.353	146.252
	290040	Berutarubesan [Berutarube]		1812		44.462	146.932
	290041	Moekeshiwan [Lvinaya Past]		-7480		44.608	146.994
	290050	Etorofu-Atosanupuri [Atosanupuri]		1932		44.808	147.131
	290061	Unnamed	17.5 km NW of Iturup Island	1967		45.022	147.019
	290070	Etorofu-Yakeyama [Grozny Group]	Etorofu-Yake-yama / Ivan Grozny	2013	2013	45.012	147.871
	290080	Sashiusudake [Baransky]		1951		45.1	148.019
	290090	Chirippusan [Chirip]	SE of Bogdan Khmelinitskii summit	1860		45.338	147.92
	290100	Moyorodake [Medvezhia]	Kudriavy	1999	1999	45.389	148.838
	290120	Kolokol Group	Berg	2009		46.042	150.083
	290150	Chirpoi	Snow	2012	2016	46.532	150.871
	290160	Unnamed		1972	1972	46.47	151.28
	290161	Milna	Goriaschaia Sopka	1944		46.815	151.786
	290180	Zavaritzki Caldera	North end of caldera lake	1957	1957	46.925	151.95
	290190	Prevo Peak		1825		47.02	152.12
	290200	Ketoi		2018	2018	47.35	152.475
	290210	Ushishur	SE caldera wall	1884		47.52	152.8
	290211	Srednii		1880	1880	47.6	152.92
	290220	Rasshua		1957		47.77	153.02
	290240	Sarychev Peak		2021	2021	48.092	153.2
	290250	Raikoke		2019	2019	48.292	153.25
	290260	Chirinkotan		2016	2017	48.98	153.48
	290270	Ekarma	Upper SW flank	2010	2010	48.958	153.93
	290290	Sinarka		2014	2014	48.873	154.182
	290300	Kharimkotan	Severgin	1933	1933	49.12	154.508
	290310	Tao-Rusyr Caldera	Krenitzyn Peak (east flank)	1952	1952	49.35	154.7
	290320	Nemo Peak		1938		49.57	154.808
	290340	Fuss Peak		1933		50.267	155.246
	290350	Karpinsky Group	East side of Karpinsky Ridge	1952		50.148	155.373
	290360	Chikurachki		2016	2016	50.324	155.461
	290380	Ebeko		2016	2021	50.686	156.014
	290390	Alaid		2018	2018	50.861	155.565
	300010	Kambalny		2017	2017	51.306	156.875
	300020	Koshelev		1741		51.356	156.753
	300021	Yavinsky	NW flank (Ukho)	-4050		51.533	156.629
	300022	Diky Greben		350		51.452	156.978
	300023	Kurile Lake		-6440		51.45	157.12
	300030	Iliinsky	NE flank	1901		51.498	157.203
	300040	Zheltovsky		1972		51.577	157.328
	300050	Ksudach	Stubel	1907		51.844	157.572
	300053	Khodutka		-300		52.062	157.711
	300060	Mutnovsky		2000	2000	52.449	158.196
	300070	Gorely		2010	2010	52.559	158.03
	300080	Opala		1894		52.543	157.339
	300082	Tolmachev Dol	NW part of Tolmachev Dol	300		52.63	157.58
	300083	Vilyuchik		-8050		52.7	158.28
	300084	Barkhatnaya Sopka		-3550		52.802	158.24
	300090	Koryaksky	Upper NW flank (3000 m)	2008	2009	53.321	158.712
	300100	Avachinsky		2001	2001	53.256	158.836
	300110	Dzenzursky		1957	1957	53.637	158.922
	300120	Zhupanovsky		2016	2016	53.589	159.15
	300121	Veer		1856		53.75	158.45
	300122	Kostakan	Glavny	1350		53.83	158.05
	300123	Bakening	Western flank	-550		53.905	158.07
	300124	Zavaritsky	14 km WNW of Zavaritsky	-800		53.905	158.385
	300125	Akademia Nauk	North margin of Karymsky Lake	1996	1996	53.98	159.45
	300130	Karymsky		2020	2021	54.049	159.443
	300140	Maly Semyachik	Ceno-Semiachik (Toitsky Crater)	1952		54.135	159.674
	300150	Bolshoi Semiachik	Korona and Yezh lava domes	-4450		54.32	160.02
	300160	Taunshits		-550		54.528	159.804
	300170	Uzon	Khloridnoe Lake	200		54.5	159.97
	300180	Kikhpinych	East flank of Savich (Krab cone)	1550		54.489	160.251
	300190	Krasheninnikov	Northern cone (Pauk) & SW of S cone	1550		54.596	160.27
	300200	Kronotsky	Summit and/or south flank (3150 m)	1923		54.753	160.533
	300210	Gamchen	SE flank (Barany, Lukovitsa)	-550		54.974	160.703
	300220	Komarov		950		55.033	160.725
	300221	Vysoky		-550		55.064	160.765
	300230	Kizimen		2010	2013	55.131	160.32
	300240	Tolbachik	Tolbachinsky Dol	2012	2013	55.832	160.326
	300250	Bezymianny		2010	2021	55.972	160.595
	300260	Klyuchevskoy		2019	2021	56.056	160.642
	300261	Ushkovsky		1890		56.113	160.509
	300270	Sheveluch		1999	2021	56.653	161.36
	300271	Piip		-5050		55.42	167.33
	300272	Khangar		1500		54.761	157.407
	300273	Cherpuk Group	North and South Cherpuk	-4550		55.55	157.47
	300280	Ichinsky	SSW flank	1740		55.678	157.718
	300360	Bolshoi-Kekuknaysky	N flank of Kekuknaysky (Kekuk Crater)	-5310		56.483	157.917
	300450	Alney-Chashakondzha	Alney volcano	1600		56.656	159.647
	300511	Shisheika		-2240		57.153	161.09
	300512	Terpuk		-800		57.2	159.83
	300520	Sedanka Lava Field		-7050		57.317	160.067
	300550	Gorny Institute		1250		57.33	160.2
	300551	Kinenin		850		57.35	160.97
	300552	Bliznetsy		-1060		57.35	161.37
	300560	Titila		-550		57.406	160.108
	300590	Elovsky	NE side (Ozernovsky lava flow)	-7550		57.55	160.53
	300650	Nylgimelkin		-3550		57.97	160.65
	300671	Spokoiny		-3450		58.13	160.82
	300680	Ostry	SW flank cinder cone	-2050		58.18	160.82
	300700	Severny	WSW flank (Tobeltsen)	-1550		58.28	160.87
	302030	Udokan Plateau	Chepe	-220		56.28	117.77
	302060	Jom-Bolok	Jom-Bolok (Atkinson cone)	-5180		52.713	99.021
	303010	Taryatu-Chulutu	Horgo cone	-2980		48.133	99.95
	304030	Kunlun Volcanic Group	Ashi Shan	1951		35.52	80.2
	305011	Arxan-Chaihe		0		47.45	120.8
	305030	Wudalianchi	Laoheishan	1776		48.722	126.15
	305040	Jingbo		-520		44.08	128.83
	305050	Longgang Group	Jinlongdingzi	350		42.33	126.5
	305060	Changbaishan	Liuhaojie tuff ring?	1903		41.98	128.08
	306030	Ulreung		-2990		37.5	130.87
	306040	Halla		1007		33.361	126.53
	311020	Kiska	Upper NW? flank	1990	1990	52.103	177.602
	311050	Little Sitkin	Summit and west flank	1828	1830	51.95	178.543
	311060	Semisopochnoi		2021	2021	51.93	179.58
	311070	Gareloi		1996		51.79	-178.794
	311080	Tanaga		1914		51.885	-178.146
	311090	Takawangha		1550		51.873	-178.006
	311110	Kanaga		2012	2012	51.923	-177.168
	311111	Moffett		-1600		51.944	-176.747
	311120	Great Sitkin		2019	2019	52.076	-176.13
	311130	Kasatochi		2008	2008	52.177	-175.508
	311140	Koniuji		-1150		52.22	-175.13
	311160	Atka		1996		52.331	-174.139
	311161	Korovin		2006	2007	52.381	-174.166
	311180	Seguam	Near Pyre Peak	1993	1993	52.315	-172.51
	311190	Amukta		1997		52.5	-171.252
	311210	Yunaska		1937	1937	52.643	-170.629
	311230	Carlisle		1987		52.894	-170.054
	311240	Cleveland		2020	2020	52.825	-169.944
	311260	Kagamil		1929		52.974	-169.72
	311270	Vsevidof	West flank fissure	1957	1957	53.13	-168.693
	311290	Okmok	NE caldera floor	2008	2008	53.43	-168.13
	311300	Bogoslof		2016	2017	53.93	-168.03
	311310	Makushin		1995	1995	53.891	-166.923
	311320	Akutan		1992		54.134	-165.986
	311340	Westdahl	ENE flank (1560-760 m)	1991	1992	54.516	-164.65
	311350	Fisher	Mount Finch	1830		54.65	-164.43
	311360	Shishaldin	Summit crater	2019	2020	54.756	-163.97
	311370	Isanotski		1845		54.765	-163.723
	311380	Roundtop		-7600		54.8	-163.589
	311390	Amak		1796		55.424	-163.149
	312030	Pavlof		2016	2016	55.417	-161.894
	312050	Dana		-1890		55.641	-161.214
	312060	Kupreanof	SSW flank (1575 m)	1987	1987	56.011	-159.797
	312070	Veniaminof		2021	2021	56.17	-159.38
	312080	Black Peak		-1900		56.552	-158.785
	312090	Aniakchak		1951	1951	56.88	-158.17
	312100	Yantarni		-800		57.019	-157.185
	312110	Chiginagak		1998	1998	57.135	-156.99
	312130	Ugashik-Peulik	Peulik	1852		57.751	-156.368
	312131	Ukinrek Maars	West and East Ukinrek Maars	1977	1977	57.832	-156.51
	312140	Martin	Volcano Uncertain: SW of Trident; probably Martin	1953		58.172	-155.361
	312150	Mageik		1946		58.195	-155.253
	312160	Trident	SW flank	1974		58.236	-155.1
	312170	Katmai		1931	1931	58.28	-154.963
	312180	Novarupta		1950		58.27	-155.157
	312190	Griggs		-1790		58.354	-155.092
	312200	Snowy Mountain	NE Snowy Mountain	1710		58.336	-154.682
	312250	Kaguyak	Kaguyak caldera	-3850		58.608	-154.028
	312260	Fourpeaked	Fissure trending N from summit	2006	2006	58.77	-153.672
	313010	Augustine		2005	2006	59.363	-153.43
	313020	Iliamna		1987	1987	60.032	-153.09
	313030	Redoubt	South of 1990 dome	2009	2009	60.485	-152.742
	313040	Spurr	South flank (Crater Peak)	1992	1992	61.299	-152.251
	313050	Hayes		1200		61.64	-152.411
	314010	St. Paul Island	Several km SW of St. Paul	1943		57.18	-170.3
	314060	Imuruk Lake	Lost Jim Cone	300		65.517	-163.45
	315001	Buzzard Creek		-1050		64.062	-148.433
	315020	Wrangell		2002	2002	62.006	-144.017
	315030	Churchill		847		61.38	-141.75
	315040	Edgecumbe		-2220		57.05	-135.75
	320030	Atlin Volcanic Field		1898		59.68	-133.32
	320060	Edziza	SW flank of Ice Peak	950		57.72	-130.63
	320080	Hoodoo Mountain		-7050		56.78	-131.28
	320090	Iskut-Unuk River Cones	Lava Fork	1904		56.58	-130.55
	320100	Tseax River Cone		1690		55.12	-128.9
	320140	Nazko		-5220		52.928	-123.732
	320150	Wells Gray-Clearwater	Kostal Cone	1550		52.33	-120.57
	320180	Meager	NE flank of Plinth Peak	-410		50.63	-123.5
	320200	Garibaldi	SE flank (Opal Cone)	-8060		49.85	-123
	321010	Baker	Sherman Crater	1884		48.777	-121.813
	321020	Glacier Peak		1700		48.112	-121.113
	321030	Rainier		1894	1894	46.853	-121.76
	321040	Adams	East flank?	950		46.206	-121.49
	321050	St. Helens	South of 1980-1986 lava dome	2004	2008	46.2	-122.18
	321060	West Crater	Bare Mountain	-5750		45.88	-122.08
	321070	Indian Heaven	Big Lava Bed	-6250		45.93	-121.82
	322010	Hood	Crater Rock	1907		45.374	-121.695
	322020	Jefferson	S of Jefferson (South Cinder Peak)	950		44.674	-121.8
	322030	Blue Lake Crater		680		44.411	-121.774
	322040	Sand Mountain Field		-950		44.38	-121.93
	322060	Belknap	Belknap Crater	480		44.285	-121.841
	322070	Three Sisters		1853		44.133	-121.767
	322090	Bachelor	North flank (Egan cone)	-5800		43.979	-121.688
	322100	Davis Lake	S flank of Hamner Butte (Black Rock)	-2790		43.57	-121.82
	322110	Newberry	S caldera wall	690		43.722	-121.229
	322160	Crater Lake	Lava dome ENE of Wizard Island	-2850		42.93	-122.12
	322170	Diamond Craters		-5610		43.1	-118.75
	322190	Jordan Craters	Coffeepot Crater	-1250		43.147	-117.46
	323010	Shasta		1786		41.409	-122.193
	323020	Medicine Lake	East flank (Glass Mountain ?)	1910		41.611	-121.554
	323080	Lassen Volcanic Center	Lassen Peak	1914	1917	40.492	-121.508
	323110	Mono Lake Volcanic Field		1890	1890	38	-119.03
	323120	Mono-Inyo Craters	Inyo Craters (S Deadman, Obsidian, Glass Creek)	1380		37.804	-119.029
	323150	Mammoth Mountain	North flank of Mammoth Mountain	1260		37.631	-119.032
	323160	Ubehebe Craters		-150		37.02	-117.45
	323200	Salton Buttes	Rock Hill, N & S Red Hill	210		33.197	-115.616
	324010	Black Butte Crater Lava Field		-8400		43.183	-114.352
	324020	Craters of the Moon	South of Big Craters, near Broken Top	-130		43.42	-113.5
	324030	Wapi Lava Field	Kings Bowl Rift, Wapi Lava Field	-300		42.88	-113.22
	324040	Hell's Half Acre		-3250		43.5	-112.45
	325010	Yellowstone	Indian Pond crater (N of Yellowstone Lake)	-1350		44.43	-110.67
	327040	Markagunt Plateau	Panguitch Lake	1050		37.58	-112.67
	327050	Black Rock Desert	Ice Springs Craters	1290		38.97	-112.5
	327110	Carrizozo	Little Black Peak	-3250		33.78	-105.93
	327120	Zuni-Bandera	McCartys flow	-1170		34.8	-108
	327812	Red Hill	Zuni Salt Lake maar	-9450		34.25	-108.83
	328010	Dotsero		-2200		39.661	-107.035
	329010	Uinkaret Field	Little Springs	1100		36.38	-113.13
	329020	San Francisco Volcanic Field	Sunset Crater and SE-trending fissures	1075		35.347	-111.678
	331010	Endeavour Segment		-3490		47.95	-129.1
	331011	Cobb Segment		-1180		46.88	-129.33
	331020	CoAxial Segment	N end CoAxial segment, Juan de Fuca Ridge	1993	1993	46.52	-129.58
	331021	Axial Seamount	NE flank	2015	2015	45.95	-130
	331030	Cleft Segment	N Cleft Segment, S Juan de Fuca Ridge	1986		44.83	-130.3
	331031	North Gorda Ridge Segment	Near center of North Gorda Ridge segment	1996	1996	42.67	-126.78
	331040	Escanaba Segment	40 deg 59 min North	-2260		40.98	-127.5
	332000	Loihi		1996	1996	18.92	-155.27
	332010	Kilauea		2020	2021	19.421	-155.287
	332020	Mauna Loa	Mokuaweoweo, SW and NE rift zones	1984	1984	19.475	-155.608
	332030	Mauna Kea	NE flank (Puu Lehu, 3130 m)	-2460		19.82	-155.47
	332040	Hualalai	NW rift zone (520 m)	1800	1801	19.692	-155.87
	332060	Haleakala	SW rift zone (180-360 m)	1750		20.708	-156.25
	333010	Teahitia		1985	1985	-17.564	-148.821
	333020	Rocard		1972	1972	-17.662	-148.586
	333030	Moua Pihaa		1970	1970	-18.325	-148.525
	333040	Mehetia	SE of Mehetia (-1700 m?)	1981	1981	-17.874	-148.068
	333050	Adams Seamount		-50		-25.37	-129.27
	333060	Macdonald		1987	1989	-28.98	-140.25
	334020	Northern EPR at 17°N	16.80°N	-50		16.55	-105.32
	334021	Northern EPR at 16°N		-50		15.83	-105.43
	334040	Northern EPR at 10.7°N		2003	2003	10.73	-103.58
	334050	Northern EPR at 9.8°N	East Pacific Rise (9.8 deg N)	2005	2006	9.83	-104.3
	334070	Galapagos Rift		1996		0.792	-86.15
	334100	Southern EPR at 8°S	East Pacific Rise (8.3 deg S)	1964	1969	-8.27	-107.95
	334120	Southern EPR-Segment K		1990		-17.436	-113.206
	334130	Southern EPR-Segment J		1890		-18.175	-113.35
	334140	Southern EPR-Segment I		1915		-18.53	-113.42
	335020	Hollister Ridge	Seamount by Pacific-Antarctic Ridge?	1991	1991	-53.998	-139.845
	335030	Udintsev Transform	Udinstev Fracture Zone	1990	1990	-56.153	-143.373
	341001	Pinacate		1934	1935	31.772	-113.498
	341020	Barcena	South end of Isla San Benedicto	1952	1953	19.3	-110.82
	341021	Socorro	Submarine vent 3 km W of Punta Tosca	1993	1994	18.78	-110.95
	341024	Sanganguey		1742		21.45	-104.73
	341030	Ceboruco	Upper west flank	1870	1875	21.125	-104.508
	341040	Colima		2019	2019	19.514	-103.62
	341060	Michoacan-Guanajuato	Parícutin	1943	1952	19.85	-101.75
	341061	Zitacuaro-Valle de Bravo	West of Valle de Bravo	-3050		19.4	-100.25
	341062	Jocotitlan		1270		19.73	-99.758
	341070	Toluca, Nevado de		-1350		19.108	-99.758
	341080	Chichinautzin	Xitle	400		19.08	-99.13
	341090	Popocatepetl		2005	2021	19.023	-98.622
	341091	Malinche, La		-1170		19.231	-98.032
	341093	Humeros, Los	NW and SE sides of caldera	-4470		19.68	-97.45
	341095	Naolinco Volcanic Field	Rincón de Chapultepec	-1200		19.67	-96.75
	341096	Cofre de Perote	Lower NE flank (El Volcancillo)	1150		19.492	-97.15
	341098	Cumbres, Las	North flank (Yolotepec lava dome)	-3920		19.15	-97.27
	341100	Orizaba, Pico de		1846		19.03	-97.27
	341110	San Martin		1932		18.57	-95.2
	341120	Chichon, El		1982	1982	17.36	-93.228
	341130	Tacana	NE flank (ca. 3600 m)	1986	1986	15.132	-92.109
	342020	Tajumulco		1863		15.043	-91.903
	342030	Santa Maria	SW flank (Santiaguito)	1922	2021	14.757	-91.552
	342040	Almolonga		1891		14.797	-91.519
	342060	Atitlan		1856		14.583	-91.186
	342080	Acatenango	Pico Central-Yepocapa saddle	1972	1972	14.501	-90.876
	342090	Fuego		2002	2021	14.473	-90.88
	342100	Agua		1541		14.465	-90.743
	342110	Pacaya	MacKenney Crater	2015	2021	14.382	-90.601
	342120	Tecuamburro	NW flank (Ixpaco Crater)	-960		14.156	-90.407
	342160	Suchitan		1469		14.4	-89.78
	343010	Apaneca Range		1990		13.872	-89.742
	343020	Santa Ana		2005	2005	13.853	-89.63
	343030	Izalco	SSE flank (550 m below summit)	1966	1966	13.813	-89.633
	343050	San Salvador	Boquerón summit and north flank	1917	1917	13.734	-89.294
	343060	Ilopango	Islas Quemadas	1879	1880	13.672	-89.053
	343080	Tecapa		1878		13.494	-88.502
	343100	San Miguel		2020	2020	13.434	-88.269
	343150	Yojoa, Lago		-7638		14.964	-87.983
	344010	Cosiguina		1859		12.98	-87.57
	344020	San Cristobal		2020	2021	12.702	-87.004
	344040	Telica		2020	2020	12.606	-86.84
	344070	Negro, Cerro	South flank (near Cristo Rey crater)	1999	1999	12.506	-86.702
	344080	Pilas, Las	El Hoyo	1954	1954	12.495	-86.688
	344090	Momotombo		2015	2016	12.423	-86.539
	344091	Apoyeque	Apoyeque	-50		12.242	-86.342
	344092	Nejapa-Miraflores	Nejapa maar	1060		12.12	-86.32
	344100	Masaya		2015	2021	11.985	-86.165
	344110	Mombacho		1850		11.826	-85.968
	344120	Concepcion		2009	2011	11.538	-85.622
	345020	Rincon de la Vieja		2020	2020	10.83	-85.324
	345030	Miravalles	SW flank (near Las Hornillas)	1946	1946	10.748	-85.153
	345033	Arenal	W flank & summit	1968	2010	10.463	-84.703
	345040	Poas		2019	2019	10.2	-84.233
	345050	Barva		1867		10.135	-84.1
	345060	Irazu	Upper NW flank	1994	1994	9.979	-83.852
	345070	Turrialba		2020	2020	10.025	-83.767
	346010	Baru		1550		8.808	-82.543
	351011	Romeral		-5390		5.203	-75.363
	351012	Bravo, Cerro		1720		5.091	-75.293
	351020	Ruiz, Nevado del		2014	2021	4.892	-75.324
	351021	Santa Isabel		-850		4.818	-75.365
	351030	Tolima, Nevado del		1943		4.658	-75.33
	351040	Machin		1180		4.487	-75.389
	351050	Huila, Nevado del	Upper SW side of Pico Central	2008	2012	2.93	-76.03
	351060	Purace		1977	1977	2.32	-76.4
	351070	Dona Juana		1897	1906	1.5	-76.936
	351080	Galeras	Summit crater	2012	2014	1.22	-77.37
	351090	Azufral		-930		1.08	-77.68
	351100	Cumbal		1926	1926	0.95	-77.87
	351110	Chiles-Cerro Negro	Volcano Uncertain: possibly Reventador	1936		0.817	-77.938
	352001	Soche		-6650		0.552	-77.58
	352002	Chachimbiro	NNE flank (Pitzantzi lava dome)	-3740		0.468	-78.287
	352003	Cuicocha		650		0.308	-78.364
	352004	Imbabura	Huarmi Imbabura	-5550		0.258	-78.183
	352006	Cayambe	Upper SE flank	1785	1786	0.029	-77.986
	352010	Reventador		2008	2021	-0.077	-77.656
	352011	Pululahua		290		0.038	-78.463
	352020	Guagua Pichincha		2009	2009	-0.171	-78.598
	352021	Atacazo	Ninahuilca Chico II dome	-320		-0.353	-78.617
	352022	Chacana	South part of caldera	1773		-0.375	-78.25
	352030	Antisana	Volcano Uncertain: possibly Reventador	1801	1802	-0.481	-78.141
	352031	Aliso	Pumayucu	-2450		-0.53	-78
	352040	Sumaco		1933		-0.538	-77.626
	352050	Cotopaxi		2015	2016	-0.677	-78.436
	352060	Quilotoa		1797		-0.85	-78.9
	352071	Chimborazo		550		-1.464	-78.815
	352080	Tungurahua		2011	2016	-1.467	-78.442
	352090	Sangay		2019	2021	-2.005	-78.341
	353010	Fernandina		2020	2020	-0.37	-91.55
	353011	Ecuador		1150		-0.02	-91.546
	353020	Wolf		2015	2015	0.02	-91.35
	353030	Darwin	Volcano Uncertain: more likely Darwin than Wolf, Alcedo	1813	1813	-0.18	-91.28
	353040	Alcedo	South caldera wall	1993		-0.43	-91.12
	353050	Negra, Sierra	Summit crater and NNW flank	2018	2018	-0.83	-91.17
	353060	Azul, Cerro	Summit and SE flank	2008	2008	-0.92	-91.408
	353070	Pinta		1928		0.58	-90.75
	353080	Marchena	West to SW caldera rim	1991	1991	0.33	-90.47
	353090	Santiago	SE flank	1904	1906	-0.22	-90.77
	354000	Quimsachata	Oroscocha	-4450		-14.176	-71.351
	354004	Andahua-Orcopampa		1913		-15.42	-72.33
	354005	Huambo	Cerro Keyocc	-700		-15.83	-72.13
	354006	Sabancaya		2016	2021	-15.787	-71.857
	354010	Misti, El		1985		-16.294	-71.409
	354020	Ubinas		2019	2019	-16.355	-70.903
	354030	Huaynaputina	Summit and south flank	1600	1600	-16.608	-70.85
	354031	Ticsani		1800		-16.755	-70.595
	354040	Tutupaca	Volcano Uncertain: reported from Tutupaca	1902	1902	-17.026	-70.372
	354050	Yucamane		-1320		-17.184	-70.196
	355010	Tacora		1937		-17.72	-69.77
	355011	Taapaca		-320		-18.1	-69.5
	355012	Parinacota	Parinacota 3 edifice	290		-18.166	-69.142
	355020	Guallatiri		1985		-18.42	-69.092
	355030	Isluga		1960		-19.15	-68.83
	355040	Irruputuncu		1995	1995	-20.73	-68.55
	355050	Olca-Paruma		1865	1867	-20.939	-68.413
	355070	San Pedro-San Pablo		1960		-21.888	-68.391
	355090	Putana		1972		-22.557	-67.853
	355100	Lascar		2015	2017	-23.37	-67.73
	355107	Pular		1990	1990	-24.188	-68.054
	355109	Socompa		-5250		-24.396	-68.246
	355110	Llullaillaco		1877		-24.72	-68.53
	355130	Ojos del Salado, Nevados		1993	1993	-27.109	-68.541
	355160	Aracar		1993		-24.29	-67.783
	355210	Blanco, Cerro		-2300		-26.789	-67.765
	357010	Tupungatito		1987	1987	-33.425	-69.797
	357020	San Jose		1960		-33.789	-69.895
	357021	Maipo		1912		-34.164	-69.832
	357030	Tinguiririca		1994	1994	-34.814	-70.352
	357040	Planchon-Peteroa		2018	2019	-35.223	-70.568
	357041	Infiernillo	Volcán Hoyo Colorado	-6890		-35.123	-69.9
	357050	Descabezado Grande	Upper NNE slope	1932	1933	-35.58	-70.75
	357060	Azul, Cerro	Quizapu	1967		-35.653	-70.761
	357061	Maule, Laguna del		-50		-36.058	-70.492
	357063	Longavi, Nevado de		-4890		-36.193	-71.161
	357066	Payun Matru	Escorial del Matru caldera	-5050		-36.422	-69.241
	357070	Chillan, Nevados de	Nicanor crater	2016	2021	-36.868	-71.378
	357072	Tromen		1822		-37.144	-70.033
	357080	Antuco		1972		-37.406	-71.349
	357090	Copahue	Agrio Crater	2020	2020	-37.856	-71.183
	357091	Callaqui		2012	2012	-37.92	-71.45
	357093	Tolhuaca	Pemehue	-4000		-38.31	-71.645
	357100	Lonquimay	NE flank (Navidad Crater)	1988	1990	-38.379	-71.586
	357110	Llaima	Summit and upper east flank	2008	2009	-38.692	-71.729
	357111	Sollipulli	North flank (Redondo, Chufquén)	1240		-38.97	-71.52
	357112	Caburgua-Huelemolle	Huelemolle and Caburgua cones	-5050		-39.25	-71.75
	357120	Villarrica		2014	2021	-39.42	-71.93
	357121	Quetrupillan		1872		-39.496	-71.722
	357122	Lanin		560		-39.637	-71.502
	357123	Huanquihue Group	Achín-Niellu (Volcán Escorial)	1750		-39.887	-71.58
	357130	Mocho-Choshuenco	El Mocho	1937		-39.927	-72.027
	357140	Carran-Los Venados	Mirador	1979	1979	-40.35	-72.07
	357150	Puyehue-Cordon Caulle	Cordón Caulle, N of the 1960 eruption fissure	2011	2012	-40.59	-72.117
	357153	Antillanca Volcanic Complex	Casablanca (Raihuén crater)	-230		-40.783	-72.15
	357160	Puntiagudo-Cordon Cenizos		1930		-40.969	-72.264
	358010	Osorno		1869		-41.105	-72.496
	358012	Cayutue-La Vigueria	La Viguería	-190		-41.25	-72.27
	358020	Calbuco		2015	2015	-41.33	-72.618
	358022	Yate	SE flank	1090		-41.755	-72.396
	358023	Hornopiren		1835		-41.874	-72.431
	358024	Apagado		-590		-41.88	-72.58
	358030	Huequi		1920		-42.377	-72.578
	358040	Michinmahuida		1915		-42.799	-72.445
	358041	Chaiten		2008	2011	-42.833	-72.646
	358049	Yanteles		1835		-43.497	-72.81
	358050	Corcovado		1835		-43.189	-72.794
	358052	Melimoyu		200		-44.08	-72.88
	358054	Mentolat		1710		-44.7	-73.08
	358056	Maca	SW flank (Bahía Pérez)	1560		-45.1	-73.17
	358057	Hudson, Cerro	S and SE edge of the caldera	2011	2011	-45.9	-72.97
	358060	Lautaro		1979		-49.019	-73.504
	358062	Aguilera		-1250		-50.33	-73.75
	358063	Reclus		1908		-50.964	-73.585
	358070	Burney, Monte		1910		-52.33	-73.4
	358080	Pali-Aike Volcanic Field		-5550		-52.082	-69.698
	358090	Fueguino		1820	1820	-54.97	-70.262
	360010	Saba	SW flank	1640		17.63	-63.23
	360020	Quill, The		250		17.478	-62.96
	360030	Liamuiga		1843		17.37	-62.8
	360050	Soufriere Hills		2005	2013	16.72	-62.18
	360060	Soufriere Guadeloupe	SE side of summit (Gouffre Tarissan)	1976	1977	16.044	-61.664
	360100	Trois Pitons, Morne	Micotrin?	920		15.37	-61.33
	360101	Watt, Morne	NE of Watt Mtn (Valley of Desolation)	1997	1997	15.307	-61.305
	360110	Plat Pays, Morne	Morne Patates	1270		15.255	-61.341
	360120	Pelee		1929	1932	14.809	-61.165
	360140	Qualibou	Sulphur Springs area	1766		13.83	-61.05
	360150	Soufriere St. Vincent		2020	2021	13.33	-61.18
	360160	Kick 'em Jenny		2017	2017	12.3	-61.64
	370010	Snaefellsjokull		200		64.8	-23.783
	370030	Ljosufjoll	Raudhalsar	960		64.9	-22.483
	371020	Reykjanes	Reykjaneshryggur (Eldeyjarbodi)	1970		63.817	-22.717
	371022	Eldey	Reykjaneshryggur (NE of Eldey)	1926		63.733	-23
	371030	Krysuvik-Trolladyngja	Tradarfjöll	1340		63.917	-22.067
	371040	Brennisteinsfjoll	Grafeldur (Selvogshraun)	1341		63.933	-21.783
	371050	Hengill	Nesjahraun, Reykjafellshraun	150		64.083	-21.416
	371060	Grimsnes	Kalfsholar	-3500		64.05	-20.883
	371070	Prestahnukur	Sköflungur	-3350		64.583	-20.666
	371080	Langjokull	Hallmundahraun	950		64.85	-19.7
	372010	Vestmannaeyjar	Heimaey (Eldfell)	1973	1973	63.416	-20.266
	372020	Eyjafjallajokull	ENE flank (Fimmvörduháls) and summit	2010	2010	63.633	-19.633
	372030	Katla	W, S, and E margins of caldera	1999	1999	63.633	-19.083
	372050	Torfajokull	N of caldera (Namshraun, Laugahraun)	1477		63.892	-19.122
	372070	Hekla	SW flank	2000	2000	63.983	-19.666
	373010	Grimsvotn	SW part of the caldera	2011	2011	64.416	-17.316
	373012	Thordarhyrna	Grímsvötn and Thordarhyrna	1902	1904	64.267	-17.617
	373030	Bardarbunga	Holuhraun	2014	2015	64.633	-17.516
	373050	Kverkfjoll		1968	1968	64.653	-16.647
	373060	Askja	North of Öskjuvatn lake (Vikraborgir)	1961	1961	65.033	-16.783
	373070	Fremrinamar		1823		65.416	-16.666
	373080	Krafla	Leirhnjúkur to 8.5 km north	1984	1984	65.715	-16.728
	373082	Heidarspordar	Threngslaborgir-Ludentsborgir crater row	-300		65.583	-16.817
	373090	Theistareykir	Storihver (Theistareykjahraun)	-900		65.833	-17.166
	373100	Tjornes Fracture Zone	Immediately north of Manareyjar Island	1867	1868	66.309	-17.118
	374010	Oraefajokull	Caldera, west flank (to 1100 m)	1727	1728	64.05	-16.633
	374020	Esjufjoll		1927		64.25	-16.583
	375010	Kolbeinsey Ridge		1838		66.67	-18.5
	376010	Jan Mayen	Beerenberg (NE flank, 0-200 m)	1985	1985	71.082	-8.155
	377020	East Gakkel Ridge at 85°E	East Gakkel Ridge	1999	1999	85.608	85.25
	381040	Pico Fracture Zone		1865		38.75	-38.08
	382001	Flores	Caldeira Comprida	-950		39.462	-31.216
	382010	Fayal	West flank (Capelinhos) and summit	1957	1958	38.6	-28.73
	382020	Pico	Off NW coast	1963		38.47	-28.4
	382030	San Jorge	Off SW coast	1964		38.65	-28.08
	382040	Graciosa	San Tamao	-1950		39.02	-27.97
	382050	Terceira	Serreta Ridge (submarine vent W of Terceira)	1998	2000	38.73	-27.32
	382070	Don Joao de Castro Bank	NW of Don Joao de Castro Bank	1997	1997	38.23	-26.63
	382080	Sete Cidades	Volcano Uncertain: submarine vent off Sao Miguel	1880		37.87	-25.78
	382081	Picos Volcanic System	Eastern part (SW of Fogo 1 cone)	1652	1652	37.78	-25.67
	382090	Agua de Pau	Lagoa do Fogo caldera	1564	1564	37.77	-25.47
	382100	Furnas	South end of caldera (Pico da Areia)	1630	1630	37.77	-25.32
	382110	Monaco Bank		1911		37.6	-25.88
	382120	Madeira	Paul da Serra	-4500		32.73	-16.97
	383010	La Palma	Teneguia	1971	1971	28.57	-17.83
	383020	Hierro	Submarine S flank, Tagaro cone	2011	2012	27.73	-18.03
	383030	Tenerife	NW rift zone (Chinyero)	1909	1909	28.271	-16.641
	383040	Gran Canaria	Bandama	40		28	-15.58
	383060	Lanzarote	Tao, Nuevo del Fuego, Tinguatón	1824	1824	29.03	-13.63
	384010	Fogo	WSW base of Pico	2014	2015	14.95	-24.35
	385030	Romanche Fracture Zone	0.58 S 15.83 W	1836		-0.433	-19.596
	385050	Ascension	South Sisters lava flow	1508		-7.95	-14.37
	385052	Walvis Ridge at 33°S	Seamount NW of Wüst seamount	2001	2002	-32.958	-5.22
	386010	Tristan da Cunha	North flank	1961	1962	-37.092	-12.28
	386011	Nightingale Island	Submarine SE flank	2004	2004	-37.42	-12.48
	386020	Bouvet		1956		-54.408	3.351
	390010	Buckle Island		1899		-66.78	163.25
	390013	Pleiades, The	NE of Mount Pleiones (Taygete Cone)	-1050		-72.67	165.5
	390015	Melbourne		1892		-74.35	164.7
	390020	Erebus		1972	2021	-77.53	167.17
	390022	Berlin		-8350		-76.05	-136
	390027	Takahe		-5550		-76.28	-112.08
	390028	Hudson Mountains	Webber Nunatak	1985		-74.33	-99.42
	390030	Deception Island		1987		-63.001	-60.652
	390031	Penguin Island	NE flank (Petrel Crater)	1905		-62.1	-57.93
	390041	Paulet		1850		-63.579	-55.78
	390050	Seal Nunataks Group	Dallman, Murdoch	1980		-65.03	-60.05
	390070	Southern Thule	South flank of Bellinghausen Island	1975		-59.442	-27.225
	390080	Bristol Island		2016	2016	-59.017	-26.533
	390081	Montagu Island	NW of Mount Belinda	2001	2007	-58.445	-26.374
	390090	Saunders	Summit crater	2014	2021	-57.8	-26.483
	390100	Candlemas Island	NW flank (Lucifer Hill)	1953		-57.08	-26.67
	390110	Hodson		1930		-56.712	-27.176
	390130	Zavodovski		2016	2016	-56.3	-27.57
	390140	Protector Seamounts		1962		-55.912	-28.167
	600000	Unknown Source	Tropical latitude (SP, 365 ppb sulfate)	1808		0	0

## Sheet: Sheet7
		Year	1	2	3	4	5	6	7	8	9	10	11	12	13	14	15	16	17	18	19	20	21	22	23	24	25	26	27	28	29	30	31	32	33	34	35	36		19	18	17	16	15	14	13	12	11	10
		1967	Ioto	Kelut	Karangetang	Io-Torishima	Karymsky	Kerinci	Tolbachik	Talang	Chikurachki	Semeru	Taal	Gaua	Tangkuban Parahu	Lengai, Ol Doinyo	Tambora	Klyuchevskoy	Fukutoku-Oka-no-Ba	Izu-Oshima	Asosan	Slamet	Unnamed	Marapi	Farallon de Pajaros	Tolbachik	Kelut	Ulawun	Langila	Ebeko	Merapi
		1968	Kuchinoerabujima	Marapi	Lewotobi	Fukujin	Talang	Banua Wuhu	Bagana	Awu	Kita-Ioto	Fukutoku-Oka-no-Ba	Izu-Oshima	Io-Torishima	Soputan	Klyuchevskoy	Tolbachik	Gaua	Kelimutu	Nila	Mayon	Long Island	Etorofu-Yakeyama [Grozny Group]	Fukutoku-Oka-no-Ba	Kerinci	Taal	Batur	Izu-Oshima	Talang
		1969	Ioto	Lokon-Empung	Taal	Kavachi	Kanlaon	Langila	Gaua	Klyuchevskoy	Tangkuban Parahu	Lengai, Ol Doinyo	Kerinci	Krakatau	Slamet	Didicas	Supply Reef	Ebulobo	Ebeko	Iya	Izu-Oshima	Ioto
		1970	Karangetang	Taal	Akita-Komagatake	Tolbachik	Marapi	Sorikmarapi	Lewotobi	Sirung	Etorofu-Yakeyama [Grozny Group]	Esmeralda Bank	Izu-Oshima	Kanlaon	Klyuchevskoy	Bagana	Langila	Karymsky	Asosan	Kolokol Group	Soputan	Myojinsho	Izu-Oshima	Tolbachik	Ulawun	Batur
		1971	Klyuchevskoy	Sundoro	Raung	Tinakula	Kirishimayama	Ebeko	Klyuchevskoy	Iya	Kerinci	Soputan	Gaua	Lokon-Empung	Izu-Oshima	Myojinsho	Bezymianny	Batur	Langila	Lewotobi	Merapi
		1972	Kavachi	Paluweh	Ritter Island	Merapi	Fukutoku-Oka-no-Ba	Karthala	Kuchinoerabujima	Bagana	Alaid	Krakatau	Fournaise, Piton de la	Unnamed	Zheltovsky	Tengger Caldera	Batur	Karangetang	Central Bismarck Sea																											Poas	Fernandina	Galapagos Rift	Putana
		1973	Fukutoku-Oka-no-Ba	Iliwerung	Kuchinoerabujima	Paluweh	Tolbachik	Gaua	Ulawun	Fukujin	Lokon-Empung	Slamet	Chikurachki	Kolokol Group	Marapi	Chachadake [Tiatia]	Alaid	Etorofu-Yakeyama [Grozny Group]	Raung	Fournaise, Piton de la	Long Island	Iliboleng	Nishinoshima	Batur	Langila	Asamayama	Dempo	Asosan	Etorofu-Yakeyama [Grozny Group]	Soputan
		1974	Karkar	Fukutoku-Oka-no-Ba	Kavachi	Ritter Island	Lengai, Ol Doinyo	Niigata-Yakeyama	Sumisujima	Chachadake [Tiatia]	Raung	Kuchinoerabujima	Slamet	Klyuchevskoy	Batur	Manam	Chokaisan	Izu-Oshima	Dempo	Karkar	Ioto
		1975	Kasuga 1	Lokon-Empung	Fournaise, Piton de la	Asosan	Izu-Torishima	Minami-Hiyoshi	Kavachi	Sumisujima	Nishinoshima	Sofugan	Tolbachik	Esmeralda Bank	Krakatau	Raung	Marapi
		1976	Minami-Hiyoshi	Fournaise, Piton de la	Sarychev Peak	Karangetang	Taal	Kavachi	Sumisujima	Fukujin	Fukutoku-Oka-no-Ba	Raung	Kuchinoerabujima	Batur	Bezymianny	Iliwerung	Kusatsu-Shiranesan	Minami-Hiyoshi	Ioto	Gaua	Long Island
		1977	Azumayama	Mahawu	Fournaise, Piton de la	Sumisujima	Fukujin	Taal	Toya	Klyuchevskoy	Kavachi	Raung	Gaua	Asosan	Karthala	Bezymianny	Fournaise, Piton de la	Kavachi																											Kick 'em Jenny	Villarrica	Irazu	Fuego	Purace
		1978	Shikotsu	Ioto	Nishinoshima	Bezymianny	Fukujin	Bulusan	Chachadake [Tiatia]	Krakatau	Kanlaon	Kavachi	Shikotsu	Ulawun	Mayon	Karangetang	Minami-Hiyoshi	Raung	Didicas
		1979	Bulusan	Ahyi	Ontakesan	Bezymianny	Krakatau	Myojinsho	Nikko	Peuet Sague	Asosan	Karangetang	Fournaise, Piton de la	Fukujin	Chirinkotan	Dieng Volcanic Complex	Kirishimayama	Bezymianny	Karkar
		1980	Myojinsho	Paluweh	Kavachi	Ulawun	Kuchinoerabujima	Asosan	Marion Island	Gamalama	Sheveluch	Bezymianny	Kanlaon	Nishinoshima	Gaua	Gorely	Tengger Caldera	Ekarma	Bezymianny	Marapi	Karangetang	Krakatau	Ioto	Karkar
		1981	Klyuchevskoy	Alaid	Kavachi	Gaua	Dieng Volcanic Complex	Asosan	Bezymianny	Chachadake [Tiatia]	Pagan	Alaid	Krakatau	Bulusan	Gamkonora	Shikotsu	Fournaise, Piton de la	Klyuchevskoy	Fukujin
		1982	Marapi	Fukujin	Ioto	Chirpoi	Iliboleng	Kusatsu-Shiranesan	Klyuchevskoy	Asamayama	Soputan	Myojinsho	Raung	Karangetang	Kita-Ioto	Asamayama	Gaua	Nishinoshima	Kavachi	Esmeralda Bank	Galunggung	Alaid	Klyuchevskoy	Marapi	Ioto	Chachadake [Tiatia]	Fukujin
		1983	Tengger Caldera	Fournaise, Piton de la	Ulawun	Miyakejima	Tangkuban Parahu	Iliwerung	Gamalama	Kusatsu-Shiranesan	Colo	Asosan	Kita-Ioto	Nishinoshima	Marapi	Bulusan	Karangetang	Myojinsho	Iliboleng	Tengger Caldera	Niigata-Yakeyama	Asamayama	Lengai, Ol Doinyo
		1984	Ulawun	Kaitoku Seamount	Marapi	Suwanosejima	Mayon	Ulawun	Gorely	Lokon-Empung	Tinakula	Soputan	Tengger Caldera	Paluweh	Akan	Asosan	Sheveluch	Klyuchevskoy	Kaitoku Seamount	Bezymianny	Galunggung
		1985	Kavachi	Nishinoshima	Ulawun	Tangkuban Parahu	Kanlaon	Suwanosejima	Supply Reef	Raung	Klyuchevskoy	Sangeang Api	Tokachidake	Fournaise, Piton de la	Bezymianny	Sheveluch	Soputan	Karymsky	Kanlaon	Paluweh	Heard
		1986	Bezymianny	Klyuchevskoy	Chikurachki	Izu-Oshima	Myojinsho	Chirinkotan	Merapi	Sarychev Peak	Dieng Volcanic Complex	Talang	Kavachi	Sorikmarapi	Peuet Sague	Nishinoshima	Kaitoku Seamount	Klyuchevskoy	Kanlaon	Iliboleng	Alaid	Fukutoku-Oka-no-Ba	Sheveluch	Bezymianny	Lokon-Empung	Fukutoku-Oka-no-Ba
		1987	Ranakah	Izu-Oshima	Myojinsho	Ebeko	Iliboleng	Fukutoku-Oka-no-Ba	Pagan	Kita-Ioto	Fukutoku-Oka-no-Ba	Esmeralda Bank	Raung	Niigata-Yakeyama	Gamkonora	Kanlaon	Marapi																														Fuego	Masaya	Rincon de la Vieja
		1988	Tokachidake	Sheveluch	Pagan	Makian	Slamet	Kanlaon	Asosan	Banda Api	Lokon-Empung	Myojinsho	Bulusan	Pagan	Krakatau	Gamalama	Kita-Fukutokutai	Kikai	Suwanosejima	Akan
		1989	Kanlaon	Supply Reef	Tinakula	Bezymianny	Sumisujima	Kita-Ioto	Karangetang	Izu-Tobu	Etorofu-Yakeyama [Grozny Group]	Soputan	Niigata-Yakeyama	Sheveluch	Asosan	Ebeko	Sumisujima	Sarychev Peak	Kusatsu-Shiranesan	Ulawun
		1990	Kerinci	Unzendake	Izu-Oshima	Asamayama	Gamalama	Suwanosejima	Kelut	Bezymianny	Lewotobi	Fournaise, Piton de la	Raung	Sheveluch																																	Pacaya	Galeras	Llaima
		1991	Kirishimayama	Sumisujima	Iliboleng	Arjuno-Welirang	Raung	Fournaise, Piton de la	Fukutoku-Oka-no-Ba	Karthala	Peuet Sague	Karangetang	Gamalama	Soputan	Lokon-Empung	Ontakesan	Lewotobi	Iliboleng	Kavachi	Klyuchevskoy	Pinatubo	Barren Island	Ranakah	Kanlaon	Ebeko	Avachinsky																						Planchon-Peteroa	Colima
		1992	McDonald Islands	Fukutoku-Oka-no-Ba	Krakatau	Klyuchevskoy	Fournaise, Piton de la	Sumisujima	Pinatubo	Kanlaon	Heard	Asosan	Pagan	Awu	Bezymianny	Minami-Hiyoshi	Klyuchevskoy	Merapi	Heard	Kanlaon
		1993	Long Island	Ioto	Bezymianny	Iliwerung	Sumisujima	Kanlaon	Ijen	Iliboleng	Gamalama	Taftan	Raung	Pinatubo	Mayon	Dieng Volcanic Complex	Pagan	Ulawun	Heard																													Galeras	Socorro
		1994	Barren Island	Bulusan	Dempo	Rabaul	Lengai, Ol Doinyo	Klyuchevskoy	Ioto	Batur	Fukutoku-Oka-no-Ba	Sumisujima	Raung	Bezymianny	Rinjani	Asosan	Ulawun	Krakatau	Ijen	Sumisujima	Gamalama																										Tinguiririca	Poas	Ruiz, Nevado del
		1995	Boomerang Seamount	Rabaul	Fukutoku-Oka-no-Ba	Karangetang	Ruby	Kujusan	Bezymianny	Rinjani	Tengger Caldera	Raung	Sumisujima	Tinakula	Raung	Tengger Caldera	Ambae	Yakedake																															San Miguel
		1996	Dieng Volcanic Complex	Suwanosejima	McDonald Islands	Alaid	Akan	Klyuchevskoy	Karangetang	Adatarayama	Kerinci	Kanlaon	Bezymianny	Krakatau	Gamalama	Pagan	Ruang	Sorikmarapi	Hokkaido-Komagatake	Unzendake	Sumisujima	Minami-Hiyoshi	Akademia Nauk	Karymsky
		1997	Bezymianny	Sumisujima	Fukutoku-Oka-no-Ba	Niigata-Yakeyama	Klyuchevskoy	Alaid	Akita-Yakeyama	Kikai	Sangeang Api	Akita-Yakeyama	Bezymianny	Raung	Krakatau	Kita-Ioto	Sheveluch	Kavachi
		1998	Ibu	Akan	Kerinci	Kita-Ioto	Sumisujima	Hokkaido-Komagatake	Fukutoku-Oka-no-Ba	Klyuchevskoy	Karangetang	Kerinci	Batur	Kavachi	Bezymianny	Sheveluch	Kita-Ioto	Kikai	Peuet Sague	Niigata-Yakeyama	Fournaise, Piton de la																												Axial Seamount
		1999	Kavachi	Ulawun	Moyorodake [Medvezhia]	Ioto	Fukutoku-Oka-no-Ba	Kita-Ioto	Sheveluch	Raung	Fournaise, Piton de la	Ijen	Mayon	Suwanosejima	Iliwerung	Tinakula	Slamet	Marapi	Sheveluch	Lewotobi	Kerinci	Karangetang	Batur	Peuet Sague	Bezymianny	Kavachi	Krakatau	Klyuchevskoy	Suwanosejima
		2000	Peuet Sague	Suwanosejima	Tengger Caldera	Sumisujima	Kita-Ioto	Kikai	Ulawun	Hokkaido-Komagatake	Ijen	Kaba	Klyuchevskoy	Fukutoku-Oka-no-Ba	Bezymianny	Slamet	Mayon	Raung	Mutnovsky	Miyakejima	Fournaise, Piton de la	Manam	Krakatau	Soputan	Lokon-Empung	Toya	Mutnovsky	Bezymianny	Marapi	Heard	Tinakula	Bagana	Suwanosejima	Fournaise, Piton de la	Klyuchevskoy	Kita-Ioto	Barren Island	Kikai
		2001	Bezymianny	Karymsky	Sumisujima	Kita-Fukutokutai	Fukutoku-Oka-no-Ba	Kita-Ioto	Avachinsky	Talang	Ioto	Ulawun	Bezymianny	Krakatau	Manam	Fournaise, Piton de la	Ibu	Kerinci	McDonald Islands	Ahyi	Marapi	Fournaise, Piton de la	Nishinoshima	Ulawun	Inielika	Miyakejima	Mayon
		2002	Bezymianny	Lokon-Empung	Fukutoku-Oka-no-Ba	Kanlaon	Klyuchevskoy	Fournaise, Piton de la	Tinakula	Papandayan	Manam	Lewotobi	Mayon	Rabaul	Ruang	Sumisujima	Ulawun	Izu-Torishima	Witori	Ritter Island	Ijen	Raung	Langila	Kikai	Tinakula	Klyuchevskoy	Kita-Ioto	Lokon-Empung	Chikurachki	Manam	Fournaise, Piton de la																	Fuego	San Miguel
		2003	Sumisujima	Kita-Ioto	Manam	Mayon	Lokon-Empung	Gamalama	Bezymianny	Dieng Volcanic Complex	Asosan	NW Rota-1	Leroboleng	Heard	Fournaise, Piton de la	Lewotobi	Manam	Anatahan	Chikurachki	Ulawun	Mayon	Kita-Ioto	Kanlaon	Kikai	Asamayama
		2004	Miyakejima	Langila	McDonald Islands	Manam	Suwanosejima	Soputan	Rinjani	Klyuchevskoy	Asamayama	Marapi	Chirinkotan	Egon	Marion Island	Kerinci	Tengger Caldera	Ioto	Mayon	Awu	Ibu	Fournaise, Piton de la	Raung	Ulawun	Anatahan	Karangetang	Kavachi	Kikai	Tokachidake	Witori	Egon	Langila	Bezymianny	Asosan													Soufriere Hills	Telica	Popocatepetl
		2005	Soputan	Ambang	Bezymianny	Ambae	Karthala	Krummel-Garbuna-Welcker	Fournaise, Piton de la	Fukutoku-Oka-no-Ba	Mayon	Raung	McDonald Islands	Fukutoku-Oka-no-Ba	Kolokol Group	Barren Island	Langila	Soputan	Karthala	Asosan	Miyakejima	Talang	Ulawun	Chikurachki	Sumisujima	Fournaise, Piton de la	Egon	Ebeko	Rabaul	Kanlaon	Klyuchevskoy																	Popocatepetl	Masaya
		2006	Soputan	Pagan	Ritter Island	Bulusan	Dempo	Talang	Miyakejima	Rabaul	Langila	Fournaise, Piton de la	Mayon	Karangetang	Tara, Batu	Kanlaon	Karthala	Bezymianny	Akan	Bulusan	Anatahan	Merapi	Heard	Ulawun	Mayon	Miyakejima	Tinakula
		2007	Ulawun	Talang	Anatahan	Krakatau	Kelut	Kerinci	Witori	Gamalama	Chikurachki	Raung	Gamkonora	Soputan	Lengai, Ol Doinyo	Ritter Island	Bezymianny	Ulawun	Kavachi	Ontakesan	Talang	Chikurachki	Klyuchevskoy	Tara, Batu	Karthala
		2008	Koryaksky	Karangetang	Akan	Klyuchevskoy	Fournaise, Piton de la	Tinakula	Kirishimayama	Mayon	Asamayama	Chikurachki	Krummel-Garbuna-Welcker	Bezymianny	Raung	Soputan	Merapi	Barren Island	Gamalama	Miyakejima	Egon	Ibu	Kerinci	Karangetang	Krummel-Garbuna-Welcker	Asosan	Miyakejima																	Llaima	Huila, Nevado del	Poas	Guagua Pichincha	Masaya	Chaiten
		2009	Bezymianny	Kirishimayama	Fournaise, Piton de la	Gaua	Dieng Volcanic Complex	Langila	Mayon	Kolokol Group	Klyuchevskoy	Sarychev Peak	Rinjani	Sangeang Api	Karkar	Slamet	Pagan	Miyakejima	Kerinci	Krakatau	Ebeko	Asamayama	Dieng Volcanic Complex	Dempo																									Poas
		2010	Tengger Caldera	Kizimen	Bulusan	Merapi	Krakatau	Fournaise, Piton de la	Sarychev Peak	Barren Island	Sinabung	Manam	Karangetang	Rabaul	Ebeko	Ekarma	Ioto	Gorely	South Sarigan Seamount	Ulawun	Bezymianny	Pagan	Miyakejima	Kirishimayama	Karkar	Fukutoku-Oka-no-Ba	Semeru
		2011	Kerinci	Gamalama	Klyuchevskoy	Gaua	Marapi	Krakatau	Langila	Soputan	Lokon-Empung	Lengai, Ol Doinyo	Ambae	Asosan	Semeru	Pagan	Klyuchevskoy	Rabaul	Karangetang	Lokon-Empung	Kirishimayama																									Turrialba	Planchon-Peteroa	Telica	Galeras
		2012	Langila	Tolbachik	Chirpoi	Ulawun	Pagan	Raung	Paluweh	Alaid	Marapi	Gamalama	Lokon-Empung	Heard	Klyuchevskoy	Soputan	Etorofu-Yakeyama [Grozny Group]	Langila	Karangetang	Sirung	Ulawun	Witori	Marapi	Ioto	Karkar	Lewotolok																						Callaqui	Turrialba
		2013	Nishinoshima	Merapi	Langila	Zhupanovsky	Barren Island	Tangkuban Parahu	Sinabung	Iliwerung	Klyuchevskoy	Ketoi	Ulawun	Izu-Torishima	Raung	Chirinkotan	Semeru	Kikai	Kerinci	Mayon	Tangkuban Parahu	Barren Island	Etorofu-Yakeyama [Grozny Group]	Mariana Back-Arc Segment at 15.5°N	Karkar	Gamkonora	Rabaul																					Colima	Sangay
		2014	Gamalama	Sinarka	Raung	Chirinkotan	Lewotobi	Ontakesan	Asosan	Mayon	Kuchinoerabujima	Rabaul	Manam	Fournaise, Piton de la	Karangetang	Zhupanovsky	Sangeang Api	Ahyi	Semeru	Krakatau	Karkar	Merapi	Slamet	Kelut	Karangetang	Marapi	Kavachi	Asosan	Raung																				San Cristobal
		2015	Kanlaon	Marapi	Tengger Caldera	Rinjani	Langila	Alaid	Lokon-Empung	Klyuchevskoy	Gamalama	Sirung	Hakoneyama	Cereme	Lengai, Ol Doinyo	Asamayama	Kuchinoerabujima	Lokon-Empung	Bulusan	Chikurachki	Fournaise, Piton de la	Soputan	Klyuchevskoy																	Sangay	San Miguel	San Cristobal	Turrialba	Calbuco	Axial Seamount	Telica	Wolf	Pacaya	Rincon de la Vieja
		2016	Chirinkotan	Zhupanovsky	Kerinci	Ebeko	Ulawun	Asosan	Karymsky	Lengai, Ol Doinyo	Fournaise, Piton de la	Gamalama	Rinjani	Chikurachki	Bulusan	Fournaise, Piton de la	Kerinci	Chikurachki	Bulusan	Soputan
		2017	Kanlaon	Agung	Dempo	Tinakula	Sarychev Peak	Kirishimayama	Ambae	Kerinci	Sangeang Api	Fournaise, Piton de la	Ulawun	Bulusan	Marapi	Karymsky	Karangetang	Dieng Volcanic Complex	Nishinoshima	Lengai, Ol Doinyo	Aira	Kambalny	Ebulobo	Krakatau	Fournaise, Piton de la	Barren Island
		2018	Tinakula	Karangetang	Kuchinoerabujima	Gamalama	Soputan	Barren Island	Ulawun	Ketoi	Sarychev Peak	Alaid	Nishinoshima	Mayotte	Krakatau	Ulawun	Merapi	Karymsky	Marapi	Kerinci	Fournaise, Piton de la	Dieng Volcanic Complex	Kirishimayama	Karangetang	Kusatsu-Shiranesan	Mayon	Kadovar
		2019	Nishinoshima	Kikai	Asamayama	Tangkuban Parahu	Ulawun	Raikoke	Fournaise, Piton de la	Sarychev Peak	Asosan	Klyuchevskoy	Fournaise, Piton de la	Tengger Caldera	Karymsky	Sinabung
		2020	Merapi	Tengger Caldera	Fournaise, Piton de la	Lewotolok	Kikai	Kavachi	Kuchinoerabujima	Sinabung	Raung	Kikai	Karymsky	Soputan	Kavachi	Fournaise, Piton de la	Taal	Kuchinoerabujima
[truncated: 10 more columns]

## Sheet: Sheet8
		Year	1	2	3	4	5	6	7	8	9	10	11	12	13	14	15	16	17	18	19
		1967	Deception Island	Azul, Cerro	Irazu	Macdonald	Fuego	Planchon-Peteroa	San Miguel	Poas
		1968	Negro, Cerro	Arenal	Poas	Tupungatito	Azul, Cerro	Fernandina	Fernandina
		1969	Negro, Cerro	Rincon de la Vieja	Ubinas	Lascar	Poas	Rincon de la Vieja	Moua Pihaa	Deception Island	Telica
		1970	Rincon de la Vieja	Deception Island	Poas	Moua Pihaa	San Miguel
		1971	Llaima	Villarrica	La Palma	Soufriere St. Vincent	Fuego	Hudson, Cerro	San Cristobal	Negro, Cerro
		1972	Acatenango	Deception Island	Calbuco	Reventador	Kick 'em Jenny	Lautaro	Chillan, Nevados de	Antuco	Lascar	Putana	Galapagos Rift	Fernandina	Poas
		1973	Concepcion	Fernandina	Reventador	Wolf	Chillan, Nevados de	Galeras	Fuego	Colima
		1974	Fuego	Poas	Kick 'em Jenny	Lascar	Galeras	Irazu
		1975	Colima	Fuego	Telica
		1976	San Miguel	Telica	San Cristobal	Soufriere Guadeloupe	Poas	San Cristobal	Reventador	Axial Seamount
		1977	Poas	Colima	Macdonald	Kick 'em Jenny	San Cristobal	Fuego	Poas	Concepcion	Fernandina	Purace	Fuego	Irazu	Villarrica	Kick 'em Jenny
		1978	Poas	Fernandina	Lautaro	Concepcion
		1979	Negra, Sierra	Llaima	Macdonald	Poas	Carran-Los Venados	Soufriere St. Vincent	Lautaro	Azul, Cerro
		1980	Poas	Macdonald	Callaqui	Poas	Villarrica	Seal Nunataks Group	St. Helens	Macdonald	Tupungatito
		1981	Telica	Guagua Pichincha	Fernandina	Poas	Mehetia	Telica
		1982	Wolf	Cleft Segment	Chichon, El	Macdonald	Concepcion
		1983	Macdonald	Villarrica	Concepcion	Macdonald	Colima	Rincon de la Vieja
		1984	Ruiz, Nevado del	Concepcion	Lascar	Villarrica	Llaima	Rincon de la Vieja	Fernandina
		1985	Concepcion	Guallatiri	San Miguel	Rincon de la Vieja	Ruiz, Nevado del	San Cristobal	Colima	Misti, El	Guagua Pichincha
		1986	Rincon de la Vieja	Sabancaya	Lascar	Cleft Segment	CoAxial Segment	Macdonald	Tacana	Tupungatito
		1987	Tupungatito	Lascar	Telica	San Cristobal	Sabancaya	Deception Island	Colima	Poas	Macdonald	Rincon de la Vieja	Masaya	Fuego
		1988	Kick 'em Jenny	Lonquimay	Fernandina	Northern EPR at 9.8°N	Sabancaya	Concepcion	Colima
		1989	Irruputuncu	St. Helens	Masaya	Galeras
		1990	Lascar	St. Helens	Apaneca Range	Southern EPR-Segment K	Puyehue-Cordon Caulle	Sabancaya	Pular	Guagua Pichincha	Kick 'em Jenny	Llaima	Galeras	Pacaya
		1991	Northern EPR at 9.8°N	Lascar	Marchena	Villarrica	Hudson, Cerro	Rincon de la Vieja	Fernandina	Northern EPR at 9.8°N	Poas	Colima	Planchon-Peteroa
		1992	Poas	Villarrica	Llaima	Copahue	Negro, Cerro	Poas
		1993	Lascar	Alcedo	Ojos del Salado, Nevados	CoAxial Segment	Masaya	Tungurahua	Aracar	Guagua Pichincha	Lascar	Socorro	Galeras
		1994	Popocatepetl	Copahue	Irazu	Lascar	Villarrica	Telica	Colima	Lascar	Llaima	Ruiz, Nevado del	Poas	Tinguiririca
		1995	Rincon de la Vieja	Llaima	Copahue	Irruputuncu	Soufriere Hills	Negro, Cerro	Villarrica	Fogo	Fernandina	San Miguel
		1996	Masaya	Lascar	Villarrica	Galapagos Rift	Poas	Popocatepetl	North Gorda Ridge Segment	Villarrica
		1997	San Miguel	Colima	Watt, Morne	Don Joao de Castro Bank	Masaya	San Cristobal	Guagua Pichincha	Llaima
		1998	Terceira	Planchon-Peteroa	Llaima	Azul, Cerro	Masaya	Guagua Pichincha	Llaima	Villarrica	Rincon de la Vieja	Axial Seamount
		1999	Concepcion	Masaya	Tungurahua	Negro, Cerro	Fuego	Telica	San Cristobal
		2000	Pacaya	Lascar	Copahue	Sabancaya	Galeras
		2001	Kick 'em Jenny	Guagua Pichincha	Walvis Ridge at 33°S	Pacaya	Lascar	San Cristobal	Masaya	Telica
		2002	Reventador	Lascar	Telica	Llaima	Guagua Pichincha	Galeras	Pacaya	San Cristobal	Guagua Pichincha	San Miguel	Fuego
		2003	Lascar	Masaya	Chillan, Nevados de	Sabancaya	San Cristobal	Northern EPR at 10.7°N	Villarrica	Guagua Pichincha	Llaima
		2004	San Cristobal	Reventador	Telica	St. Helens	Villarrica	Nightingale Island	Pacaya	Galeras	Masaya	Popocatepetl	Telica	Soufriere Hills
		2005	Galeras	San Cristobal	Negra, Sierra	Northern EPR at 9.8°N	Concepcion	Santa Ana	Fernandina	Lascar	Soufriere Hills	Masaya	Popocatepetl
		2006	Telica	Poas	Concepcion	Telica	Masaya	Lascar	Ubinas	Poas	Pacaya
		2007	Concepcion	San Cristobal	Telica	Galeras	Telica	Llaima	Reventador	Huila, Nevado del	Concepcion
		2008	San Cristobal	Huila, Nevado del	Villarrica	Galeras	Concepcion	Reventador	Telica	San Cristobal	Azul, Cerro	Chaiten	Masaya	Guagua Pichincha	Poas	Huila, Nevado del	Llaima
		2009	Concepcion	Villarrica	Poas	San Cristobal	Fernandina	Guagua Pichincha	Villarrica	Callaqui	Chillan, Nevados de	Poas
		2010	Tungurahua	Planchon-Peteroa	Galeras	Turrialba	Ubinas	San Cristobal	Turrialba	Tungurahua
		2011	Tungurahua	Hudson, Cerro	Hierro	Rincon de la Vieja	San Cristobal	Sangay	Puyehue-Cordon Caulle	Tungurahua	Axial Seamount	Galeras	Telica	Planchon-Peteroa	Turrialba
		2012	San Cristobal	Copahue	Villarrica	Rincon de la Vieja	San Cristobal	Galeras	Masaya	Ruiz, Nevado del	Rincon de la Vieja	Turrialba	Callaqui
		2013	San Miguel	Telica	Ubinas	Villarrica	San Cristobal	Turrialba	Masaya	Lascar	Pacaya	Sangay	Colima
		2014	Villarrica	Fogo	Ruiz, Nevado del	Turrialba	Rincon de la Vieja	Pacaya	Sabancaya	San Cristobal	Copahue	San Cristobal
		2015	Momotombo	Lascar	Masaya	Telica	Copahue	Cotopaxi	San Miguel	Kick 'em Jenny	Sabancaya	Rincon de la Vieja	Pacaya	Wolf	Telica	Axial Seamount	Calbuco	Turrialba	San Cristobal	San Miguel	Sangay
		2016	Sabancaya	Ubinas	San Miguel	Poas	San Cristobal	Zavodovski	Sangay	San Miguel	Chillan, Nevados de
		2017	Fernandina	San Cristobal	Sangay	Copahue	Rincon de la Vieja	Poas	Kick 'em Jenny	San Cristobal	San Miguel
		2018	Planchon-Peteroa	Sangay	Rincon de la Vieja	Negra, Sierra	Telica	Fernandina	San Cristobal	Sangay	San Miguel
		2019	Copahue	Ubinas	Colima	Sangay	San Cristobal	Poas
		2020	San Cristobal	Soufriere St. Vincent	Telica	Turrialba	Copahue	San Miguel	Rincon de la Vieja	Fernandina

## Sheet: Sheet9
	19
	18
	17
	16
	15																																										Llaima
	14											Kick 'em Jenny																															Huila, Nevado del
	13						Poas					Villarrica																															Poas			Turrialba
	12						Fernandina					Irazu										Fuego			Pacaya				Tinguiririca										Soufriere Hills				Guagua Pichincha			Planchon-Peteroa
	11						Galapagos Rift					Fuego										Masaya			Galeras	Planchon-Peteroa		Galeras	Poas								Fuego		Telica	Popocatepetl			Masaya			Telica	Callaqui	Colima
	10						Putana					Purace										Rincon de la Vieja			Llaima	Colima		Socorro	Ruiz, Nevado del	San Miguel			Axial Seamount				San Miguel		Popocatepetl	Masaya			Chaiten	Poas		Galeras	Turrialba	Sangay	San Cristobal
	9			Telica			Lascar					Fernandina			Tupungatito					Guagua Pichincha		Macdonald			Kick 'em Jenny	Poas		Lascar	Llaima	Fernandina			Rincon de la Vieja				Guagua Pichincha	Llaima	Masaya	Soufriere Hills	Pacaya	Concepcion	Azul, Cerro	Chillan, Nevados de		Axial Seamount	Rincon de la Vieja	Pacaya	Copahue
	8	Poas		Deception Island		Negro, Cerro	Antuco	Colima			Axial Seamount	Concepcion		Azul, Cerro	Macdonald					Misti, El	Tupungatito	Poas			Guagua Pichincha	Northern EPR at 9.8°N		Guagua Pichincha	Lascar	Fogo	Villarrica	Llaima	Villarrica			Telica	San Cristobal	Guagua Pichincha	Galeras	Lascar	Poas	Huila, Nevado del	San Cristobal	Callaqui	Tungurahua	Tungurahua	Ruiz, Nevado del	Lascar	San Cristobal
	7	San Miguel	Fernandina	Moua Pihaa		San Cristobal	Chillan, Nevados de	Fuego			Reventador	Poas		Lautaro	St. Helens				Fernandina	Colima	Tacana	Colima	Colima		Pular	Fernandina		Aracar	Colima	Villarrica	North Gorda Ridge Segment	Guagua Pichincha	Llaima	San Cristobal		Masaya	Pacaya	Villarrica	Pacaya	Fernandina	Ubinas	Reventador	Telica	Villarrica	Turrialba	Puyehue-Cordon Caulle	Masaya	Masaya	Sabancaya
	6	Planchon-Peteroa	Fernandina	Rincon de la Vieja		Hudson, Cerro	Lautaro	Galeras	Irazu		San Cristobal	Fuego		Soufriere St. Vincent	Seal Nunataks Group	Telica		Rincon de la Vieja	Rincon de la Vieja	San Cristobal	Macdonald	Deception Island	Concepcion		Sabancaya	Rincon de la Vieja	Poas	Tungurahua	Telica	Negro, Cerro	Popocatepetl	San Cristobal	Guagua Pichincha	Telica		San Cristobal	Galeras	Northern EPR at 10.7°N	Nightingale Island	Santa Ana	Lascar	Llaima	Reventador	Guagua Pichincha	San Cristobal	Sangay	Galeras	Turrialba	Pacaya
	5	Fuego	Azul, Cerro	Poas	San Miguel	Fuego	Kick 'em Jenny	Chillan, Nevados de	Galeras		Poas	San Cristobal		Carran-Los Venados	Villarrica	Mehetia	Concepcion	Colima	Llaima	Ruiz, Nevado del	CoAxial Segment	Sabancaya	Sabancaya		Puyehue-Cordon Caulle	Hudson, Cerro	Negro, Cerro	Masaya	Villarrica	Soufriere Hills	Poas	Masaya	Masaya	Fuego	Galeras	Lascar	Guagua Pichincha	San Cristobal	Villarrica	Concepcion	Masaya	Telica	Concepcion	Fernandina	Ubinas	San Cristobal	San Cristobal	San Cristobal	Rincon de la Vieja
	4	Macdonald	Tupungatito	Lascar	Moua Pihaa	Soufriere St. Vincent	Reventador	Wolf	Lascar		Soufriere Guadeloupe	Kick 'em Jenny	Concepcion	Poas	Poas	Poas	Macdonald	Macdonald	Villarrica	Rincon de la Vieja	Cleft Segment	San Cristobal	Northern EPR at 9.8°N	Galeras	Southern EPR-Segment K	Villarrica	Copahue	CoAxial Segment	Lascar	Irruputuncu	Galapagos Rift	Don Joao de Castro Bank	Azul, Cerro	Negro, Cerro	Sabancaya	Pacaya	Llaima	Sabancaya	St. Helens	Northern EPR at 9.8°N	Telica	Galeras	Galeras	San Cristobal	Turrialba	Rincon de la Vieja	Rincon de la Vieja	Villarrica	Turrialba
	3	Irazu	Poas	Ubinas	Poas	La Palma	Calbuco	Reventador	Kick 'em Jenny	Telica	San Cristobal	Macdonald	Lautaro	Macdonald	Callaqui	Fernandina	Chichon, El	Concepcion	Lascar	San Miguel	Lascar	Telica	Fernandina	Masaya	Apaneca Range	Marchena	Llaima	Ojos del Salado, Nevados	Irazu	Copahue	Villarrica	Watt, Morne	Llaima	Tungurahua	Copahue	Walvis Ridge at 33°S	Telica	Chillan, Nevados de	Telica	Negra, Sierra	Concepcion	Telica	Villarrica	Poas	Galeras	Hierro	Villarrica	Ubinas	Ruiz, Nevado del
	2	Azul, Cerro	Arenal	Rincon de la Vieja	Deception Island	Villarrica	Deception Island	Fernandina	Poas	Fuego	Telica	Colima	Fernandina	Llaima	Macdonald	Guagua Pichincha	Cleft Segment	Villarrica	Concepcion	Guallatiri	Sabancaya	Lascar	Lonquimay	St. Helens	St. Helens	Lascar	Villarrica	Alcedo	Copahue	Llaima	Lascar	Colima	Planchon-Peteroa	Masaya	Lascar	Guagua Pichincha	Lascar	Masaya	Reventador	San Cristobal	Poas	San Cristobal	Huila, Nevado del	Villarrica	Planchon-Peteroa	Hudson, Cerro	Copahue	Telica	Fogo
	1	Deception Island	Negro, Cerro	Negro, Cerro	Rincon de la Vieja	Llaima	Acatenango	Concepcion	Fuego	Colima	San Miguel	Poas	Poas	Negra, Sierra	Poas	Telica	Wolf	Macdonald	Ruiz, Nevado del	Concepcion	Rincon de la Vieja	Tupungatito	Kick 'em Jenny	Irruputuncu	Lascar	Northern EPR at 9.8°N	Poas	Lascar	Popocatepetl	Rincon de la Vieja	Masaya	San Miguel	Terceira	Concepcion	Pacaya	Kick 'em Jenny	Reventador	Lascar	San Cristobal	Galeras	Telica	Concepcion	San Cristobal	Concepcion	Tungurahua	Tungurahua	San Cristobal	San Miguel	Villarrica
	year	1967	1968	1969	1970	1971	1972	1973	1974	1975	1976	1977	1978	1979	1980	1981	1982	1983	1984	1985	1986	1987	1988	1989	1990	1991	1992	1993	1994	1995	1996	1997	1998	1999	2000	2001	2002	2003	2004	2005	2006	2007	2008	2009	2010	2011	2012	2013	2014
[truncated: 6 more columns]

## Sheet: WA
		Year	1	2	3	4	5	6	7	8	9	10	11	12	13	14	15	16	17	18	19	20	21	22	23	24	25	26	27	28	29	30	31	32	33	34	35	36		19	18	17	16	15	14	13	12	11	10
		1967	24.751	-7.93	2.781	27.881	54.049	-1.697	55.832	-0.979	50.324	-8.108	14.002	-14.27	-6.77	-2.764	-8.25	56.056	24.285	34.724	32.884	-7.242	45.022	-0.38	20.546	55.832	-7.93	-5.05	-5.525	50.686	-7.54
		1968	30.443	-0.38	-8.542	21.93	-0.979	3.138	-6.137	3.689	25.424	24.285	34.724	27.881	1.112	56.056	55.832	-14.27	-8.77	-6.73	13.257	-5.358	45.012	24.285	-1.697	14.002	-8.242	34.724	-0.979
		1969	24.751	1.358	14.002	-8.991	10.412	-5.525	-14.27	56.056	-6.77	-2.764	-1.697	-6.102	-7.242	19.077	20.13	-8.817	50.686	-8.891	34.724	24.751
		1970	2.781	14.002	39.761	55.832	-0.38	0.686	-8.542	-8.508	45.012	15	34.724	10.412	56.056	-6.137	-5.525	54.049	32.884	46.042	1.112	31.888	34.724	55.832	-5.05	-8.242
		1971	56.056	-7.3	-8.119	-10.386	31.934	50.686	56.056	-8.891	-1.697	1.112	-14.27	1.358	34.724	31.888	55.972	-8.242	-5.525	-8.542	-7.54
		1972	-8.991	-8.32	-5.519	-7.54	24.285	-11.75	30.443	-6.137	50.861	-6.102	-21.244	46.47	51.577	-7.942	-8.242	2.781	-3.03
		1973	24.285	-8.53	30.443	-8.32	55.832	-14.27	-5.05	21.93	1.358	-7.242	50.324	46.042	-0.38	44.353	50.861	45.012	-8.119	-21.244	-5.358	-8.342	27.247	-8.242	-5.525	36.406	-4.016	32.884	45.012	1.112
		1974	-4.649	24.285	-8.991	-5.519	-2.764	36.921	31.44	44.353	-8.119	30.443	-7.242	56.056	-8.242	-4.08	39.099	34.724	-4.016	-4.649	24.751
		1975	21.765	1.358	-21.244	32.884	30.484	23.5	-8.991	31.44	27.247	29.794	55.832	15	-6.102	-8.119	-0.38
		1976	23.5	-21.244	48.092	2.781	14.002	-8.991	31.44	21.93	24.285	-8.119	30.443	-8.242	55.972	-8.53	36.618	23.5	24.751	-14.27	-5.358
		1977	37.735	1.352	-21.244	31.44	21.93	14.002	42.544	56.056	-8.991	-8.119	-14.27	32.884	-11.75	55.972	-21.244	-8.991
		1978	42.688	24.751	27.247	55.972	21.93	12.769	44.353	-6.102	10.412	-8.991	42.688	-5.05	13.257	2.781	23.5	-8.119	19.077
		1979	12.769	20.42	35.893	55.972	-6.102	31.888	23.078	4.903	32.884	2.781	-21.244	21.93	48.98	-7.2	31.934	55.972	-4.649
		1980	31.888	-8.32	-8.991	-5.05	30.443	32.884	-46.9	0.8	56.653	55.972	10.412	27.247	-14.27	52.559	-7.942	48.958	55.972	-0.38	2.781	-6.102	24.751	-4.649
		1981	56.056	50.861	-8.991	-14.27	-7.2	32.884	55.972	44.353	18.13	50.861	-6.102	12.769	1.38	42.688	-21.244	56.056	21.93
		1982	-0.38	21.93	24.751	46.532	-8.342	36.618	56.056	36.406	1.112	31.888	-8.119	2.781	25.424	36.406	-14.27	27.247	-8.991	15	-7.25	50.861	56.056	-0.38	24.751	44.353	21.93
		1983	-7.942	-21.244	-5.05	34.094	-6.77	-8.53	0.8	36.618	-0.162	32.884	25.424	27.247	-0.38	12.769	2.781	31.888	-8.342	-7.942	36.921	36.406	-2.764
		1984	-5.05	26.127	-0.38	29.638	13.257	-5.05	52.559	1.358	-10.386	1.112	-7.942	-8.32	43.384	32.884	56.653	56.056	26.127	55.972	-7.25
		1985	-8.991	27.247	-5.05	-6.77	10.412	29.638	20.13	-8.119	56.056	-8.2	43.418	-21.244	55.972	56.653	1.112	54.049	10.412	-8.32	-53.106
		1986	55.972	56.056	50.324	34.724	31.888	48.98	-7.54	48.092	-7.2	-0.979	-8.991	0.686	4.903	27.247	26.127	56.056	10.412	-8.342	50.861	24.285	56.653	55.972	1.358	24.285
		1987	-8.62	34.724	31.888	50.686	-8.342	24.285	18.13	25.424	24.285	15	-8.119	36.921	1.38	10.412	-0.38
		1988	43.418	56.653	18.13	0.32	-7.242	10.412	32.884	-4.523	1.358	31.888	12.769	18.13	-6.102	0.8	24.417	30.793	29.638	43.384
		1989	10.412	20.13	-10.386	55.972	31.44	25.424	2.781	34.9	45.012	1.112	36.921	56.653	32.884	50.686	31.44	48.092	36.618	-5.05
		1990	-1.697	32.761	34.724	36.406	0.8	29.638	-7.93	55.972	-8.542	-21.244	-8.119	56.653
		1991	31.934	31.44	-8.342	-7.733	-8.119	-21.244	24.285	-11.75	4.903	2.781	0.8	1.112	1.358	35.893	-8.542	-8.342	-8.991	56.056	15.13	12.278	-8.62	10.412	50.686	53.256
		1992	-53.03	24.285	-6.102	56.056	-21.244	31.44	15.13	10.412	-53.106	32.884	18.13	3.689	55.972	23.5	56.056	-7.54	-53.106	10.412
		1993	-5.358	24.751	55.972	-8.53	31.44	10.412	-8.058	-8.342	0.8	28.6	-8.119	15.13	13.257	-7.2	18.13	-5.05	-53.106
		1994	12.278	12.769	-4.016	-4.271	-2.764	56.056	24.751	-8.242	24.285	31.44	-8.119	55.972	-8.42	32.884	-5.05	-6.102	-8.058	31.44	0.8
		1995	-37.721	-4.271	24.285	2.781	15.62	33.086	55.972	-8.42	-7.942	-8.119	31.44	-10.386	-8.119	-7.942	-15.389	36.227
		1996	-7.2	29.638	-53.03	50.861	43.384	56.056	2.781	37.647	-1.697	10.412	55.972	-6.102	0.8	18.13	2.3	0.686	42.063	32.761	31.44	23.5	53.98	54.049
		1997	55.972	31.44	24.285	36.921	56.056	50.861	39.964	30.793	-8.2	39.964	55.972	-8.119	-6.102	25.424	56.653	-8.991
		1998	1.488	43.384	-1.697	25.424	31.44	42.063	24.285	56.056	2.781	-1.697	-8.242	-8.991	55.972	56.653	25.424	30.793	4.903	36.921	-21.244
		1999	-8.991	-5.05	45.389	24.751	24.285	25.424	56.653	-8.119	-21.244	-8.058	13.257	29.638	-8.53	-10.386	-7.242	-0.38	56.653	-8.542	-1.697	2.781	-8.242	4.903	55.972	-8.991	-6.102	56.056	29.638
		2000	4.903	29.638	-7.942	31.44	25.424	30.793	-5.05	42.063	-8.058	-3.522	56.056	24.285	55.972	-7.242	13.257	-8.119	52.449	34.094	-21.244	-4.08	-6.102	1.112	1.358	42.544	52.449	55.972	-0.38	-53.106	-10.386	-6.137	29.638	-21.244	56.056	25.424	12.278	30.793
		2001	55.972	54.049	31.44	24.417	24.285	25.424	53.256	-0.979	24.751	-5.05	55.972	-6.102	-4.08	-21.244	1.488	-1.697	-53.03	20.42	-0.38	-21.244	27.247	-5.05	-8.73	34.094	13.257
		2002	55.972	1.358	24.285	10.412	56.056	-21.244	-10.386	-7.32	-4.08	-8.542	13.257	-4.271	2.3	31.44	-5.05	30.484	-5.576	-5.519	-8.058	-8.119	-5.525	30.793	-10.386	56.056	25.424	1.358	50.324	-4.08	-21.244
		2003	31.44	25.424	-4.08	13.257	1.358	0.8	55.972	-7.2	32.884	14.601	-8.365	-53.106	-21.244	-8.542	-4.08	16.35	50.324	-5.05	13.257	25.424	10.412	30.793	36.406
		2004	34.094	-5.525	-53.03	-4.08	29.638	1.112	-8.42	56.056	36.406	-0.38	48.98	-8.676	-46.9	-1.697	-7.942	24.751	13.257	3.689	1.488	-21.244	-8.119	-5.05	16.35	2.781	-8.991	30.793	43.418	-5.576	-8.676	-5.525	55.972	32.884
		2005	1.112	0.75	55.972	-15.389	-11.75	-5.416	-21.244	24.285	13.257	-8.119	-53.03	24.285	46.042	12.278	-5.525	1.112	-11.75	32.884	34.094	-0.979	-5.05	50.324	31.44	-21.244	-8.676	50.686	-4.271	10.412	56.056
		2006	1.112	18.13	-5.519	12.769	-4.016	-0.979	34.094	-4.271	-5.525	-21.244	13.257	2.781	-7.791	10.412	-11.75	55.972	43.384	12.769	16.35	-7.54	-53.106	-5.05	13.257	34.094	-10.386
		2007	-5.05	-0.979	16.35	-6.102	-7.93	-1.697	-5.576	0.8	50.324	-8.119	1.38	1.112	-2.764	-5.519	55.972	-5.05	-8.991	35.893	-0.979	50.324	56.056	-7.791	-11.75
		2008	53.321	2.781	43.384	56.056	-21.244	-10.386	31.934	13.257	36.406	50.324	-5.416	55.972	-8.119	1.112	-7.54	12.278	0.8	34.094	-8.676	1.488	-1.697	2.781	-5.416	32.884	34.094
		2009	55.972	31.934	-21.244	-14.27	-7.2	-5.525	13.257	46.042	56.056	48.092	-8.42	-8.2	-4.649	-7.242	18.13	34.094	-1.697	-6.102	50.686	36.406	-7.2	-4.016
		2010	-7.942	55.131	12.769	-7.54	-6.102	-21.244	48.092	12.278	3.17	-4.08	2.781	-4.271	50.686	48.958	24.751	52.559	16.58	-5.05	55.972	18.13	34.094	31.934	-4.649	24.285	-8.108
		2011	-1.697	0.8	56.056	-14.27	-0.38	-6.102	-5.525	1.112	1.358	-2.764	-15.389	32.884	-8.108	18.13	56.056	-4.271	2.781	1.358	31.934
		2012	-5.525	55.832	46.532	-5.05	18.13	-8.119	-8.32	50.861	-0.38	0.8	1.358	-53.106	56.056	1.112	45.012	-5.525	2.781	-8.508	-5.05	-5.576	-0.38	24.751	-4.649	-8.274
		2013	27.247	-7.54	-5.525	53.589	12.278	-6.77	3.17	-8.53	56.056	47.35	-5.05	30.484	-8.119	48.98	-8.108	30.793	-1.697	13.257	-6.77	12.278	45.012	15.406	-4.649	1.38	-4.271
		2014	0.8	48.873	-8.119	48.98	-8.542	35.893	32.884	13.257	30.443	-4.271	-4.08	-21.244	2.781	53.589	-8.2	20.42	-8.108	-6.102	-4.649	-7.54	-7.242	-7.93	2.781	-0.38	-8.991	32.884	-8.119
		2015	10.412	-0.38	-7.942	-8.42	-5.525	50.861	1.358	56.056	0.8	-8.508	35.233	-6.895	-2.764	36.406	30.443	1.358	12.769	50.324	-21.244	1.112	56.056
		2016	48.98	53.589	-1.697	50.686	-5.05	32.884	54.049	-2.764	-21.244	0.8	-8.42	50.324	12.769	-21.244	-1.697	50.324	12.769	1.112
		2017	10.412	-8.343	-4.016	-10.386	48.092	31.934	-15.389	-1.697	-8.2	-21.244	-5.05	12.769	-0.38	54.049	2.781	-7.2	27.247	-2.764	31.593	51.306	-8.817	-6.102	-21.244	12.278
		2018	-10.386	2.781	30.443	0.8	1.112	12.278	-5.05	47.35	48.092	50.861	27.247	-12.83	-6.102	-5.05	-7.54	54.049	-0.38	-1.697	-21.244	-7.2	31.934	2.781	36.618	13.257	-3.608
		2019	27.247	30.793	36.406	-6.77	-5.05	48.292	-21.244	48.092	32.884	56.056	-21.244	-7.942	54.049	3.17
		2020	-7.54	-7.942	-21.244	-8.274	30.793	-8.991	30.443	3.17	-8.119	30.793	54.049	1.112	-8.991	-21.244	14.002	30.443
[truncated: 10 more columns]

[truncated: 3 more sheets: WO, EA, EO]
