# Supplementary material for: Clear anti-phase tendency of volcanic eruptions and consistent U.S. Dollar Index response to volcanic forcing
Source: Research Square preprint supplement (doi:10.21203/rs.3.rs-602091/v1), 2021-07-12
Supplement: Supplementary file 5 [file savMXNdata60.xlsx]

## Sheet: Sheet1
				-0.000750643					-0.000249209					0.000463469
				0.0623783					0.0208064					-0.028686
				-1.3579					-0.387021					-0.218809
				24.9852					7.14224					114.644
		Year	Raw	Trend	Detrend	MA3	z-score	Raw	Trend	Detrend	MA3	z-score	Raw	Trend	Detrend	MA3	z-score
		1967	26	23.6889	2.31107			4	6.77578	-2.77578			119.955	114.397	5.5584
		1968	25	22.5129	2.48709	0.115175	0.0610481	7	6.44943	0.550568	-0.462306	-0.400014	122.058	114.095	7.96335	7.39146	0.687911
		1969	17	21.4526	-4.45263	-0.156383	-0.0627859	7	6.16171	0.838292	-0.84075	-0.689989	122.394	113.742	8.65262	8.11396	0.753382
		1970	22	20.5036	1.49639	-1.87252	-0.845367	2	5.91111	-3.91111	-0.589655	-0.497592	121.065	113.339	7.72592	6.98161	0.650772
		1971	17	19.6613	-2.66132	-2.02873	-0.916601	7	5.69615	1.30385	0.959143	0.689144	117.457	112.89	4.5663	2.9919	0.289237
		1972	14	18.9213	-4.92127	0.0461558	0.0295744	11	5.51532	5.48468	2.4738	1.84972	109.082	112.398	-3.31653	-3.95824	-0.340562
		1973	26	18.2789	7.72105	0.689974	0.323164	6	5.36713	0.632871	1.95582	1.45283	98.7408	111.865	-13.1245	-8.93463	-0.791506
		1974	17	17.7299	-0.729862	1.24056	0.57424	5	5.25009	-0.250087	-1.25997	-1.01121	100.932	111.295	-10.3629	-11.802	-1.05134
		1975	14	17.2695	-3.2695	-1.29757	-0.583184	1	5.1627	-4.1627	-1.17208	-0.943865	98.77	110.689	-11.9187	-8.89065	-0.787521
		1976	17	16.8934	0.10664	-2.5866	-1.171	6	5.10346	0.89654	0.55432	0.378956	105.66	110.05	-4.39041	-7.56222	-0.667143
		1977	12	16.5969	-4.59694	-1.95534	-0.883136	10	5.07088	4.92912	1.58739	1.17053	103.005	109.383	-6.37761	-9.28396	-0.823161
		1978	15	16.3757	-1.37573	-1.73263	-0.781578	4	5.06347	-1.06347	1.92864	1.432	91.6042	108.688	-17.0838	-14.4925	-1.29514
		1979	17	16.2252	0.774767	0.752698	0.351767	7	5.07973	1.92027	0.246209	0.142872	87.9533	107.969	-20.0161	-18.8504	-1.69004
		1980	19	16.1409	2.85906	0.83849	0.390889	5	5.11817	-0.118166	0.541607	0.369216	87.7783	107.23	-19.4513	-14.0379	-1.25395
		1981	15	16.1184	-1.11835	2.86258	1.3139	5	5.17728	-0.177279	-1.18367	-0.952748	103.825	106.471	-2.64636	-3.61642	-0.309587
		1982	23	16.153	6.84704	2.82947	1.2988	2	5.25558	-3.25558	-1.92814	-1.52318	116.946	105.697	11.2484	9.93213	0.918138
		1983	19	16.2403	2.75973	3.077	1.41168	3	5.35156	-2.35156	-1.35696	-1.08552	126.105	104.911	21.1943	22.521	2.05891
		1984	16	16.3758	-0.375767	0.943004	0.438549	7	5.46374	1.53626	0.198028	0.105955	139.234	104.114	35.1204	31.3265	2.85682
		1985	17	16.555	0.445049	2.09865	0.965541	7	5.59062	1.40938	0.404984	0.26453	140.974	103.31	37.6646	27.3275	2.49445
		1986	23	16.7733	6.22668	1.54846	0.714643	4	5.7307	-1.7307	0.598736	0.412989	111.698	102.501	9.19752	13.8309	1.27143
		1987	15	17.0264	-2.02636	1.63024	0.75194	8	5.88248	2.11752	-0.21922	-0.213754	96.3208	101.69	-5.36948	-1.36121	-0.105227
		1988	18	17.3096	0.690413	-0.984811	-0.44056	5	6.04448	-1.04448	-0.714054	-0.592911	92.9692	100.881	-7.91167	-5.01155	-0.436009
		1989	16	17.6185	-1.61848	-2.2922	-1.03675	3	6.2152	-3.2152	-0.884272	-0.723337	98.3217	100.075	-1.7535	-6.59598	-0.579585
		1990	12	17.9485	-5.94854	-1.28743	-0.578559	8	6.39314	1.60686	-0.0617122	-0.0930665	89.1533	99.2761	-10.1228	-6.67171	-0.586448
		1991	22	18.2953	3.70473	-0.96599	-0.431977	8	6.5768	1.4232	0.755121	0.532817	90.3475	98.4864	-8.13887	-9.50654	-0.84333
		1992	18	18.6542	-0.654156	0.00995877	0.0130681	6	6.7647	-0.764698	0.901056	0.644637	87.4508	97.7088	-10.258	-7.09656	-0.624946
		1993	16	19.0207	-3.0207	-2.35508	-1.06542	9	6.95533	2.04467	1.37759	1.00977	94.0533	96.9462	-2.89284	-6.16347	-0.540392
		1994	16	19.3904	-3.39039	-4.38994	-1.99335	10	7.1472	2.8528	2.18621	1.62936	90.8617	96.2012	-5.33958	-6.56947	-0.577183
		1995	13	19.7587	-6.75874	-2.75679	-1.2486	9	7.33882	1.66118	0.995094	0.716691	84.0008	95.4768	-11.476	-8.12874	-0.718478
		1996	22	20.1212	1.87877	-3.45111	-1.56522	6	7.52869	-1.52869	-0.527611	-0.450052	87.205	94.7756	-7.57065	-5.5585	-0.485572
		1997	15	20.4734	-5.47336	-2.13507	-0.965093	6	7.71532	-1.71532	-0.713737	-0.592668	96.4717	94.1005	2.37113	-0.00126131	0.0180069
		1998	18	20.8106	-2.81062	-2.1375	-0.966202	9	7.8972	1.1028	-0.895122	-0.731651	98.65	93.4543	5.19574	4.92131	0.464074
		1999	23	21.1285	1.87148	3.5461	1.6256	6	8.07285	-2.07285	-1.73694	-1.37668	100.037	92.8396	7.19707	9.94588	0.919385
		2000	33	21.4226	11.5774	4.92024	2.25222	4	8.24077	-4.24077	-2.90436	-2.27119	109.704	92.2593	17.4448	16.1933	1.4855
		2001	23	21.6882	1.31179	4.98942	2.28377	6	8.39946	-2.39946	-2.39589	-1.88158	115.654	91.7162	23.9379	20.346	1.86181
		2002	24	21.921	2.07902	1.09148	0.506256	8	8.54743	-0.547431	-1.21003	-0.97294	110.868	91.2131	19.6552	16.0649	1.47387
		2003	22	22.1164	-0.116376	2.89759	1.32986	8	8.68319	-0.683185	-0.678615	-0.565756	95.3542	90.7527	4.60146	7.02546	0.654745
		2004	29	22.2699	6.73012	2.41225	1.10854	8	8.80523	-0.805228	-0.800159	-0.658888	87.1575	90.3378	-3.18032	-0.352258	-0.0137993
		2005	23	22.377	0.622998	1.9733	0.908376	8	8.91206	-0.912064	-0.906497	-0.740367	87.4933	89.9712	-2.47791	-3.13549	-0.266007
		2006	21	22.4332	-1.43323	-2.08143	-0.940632	8	9.0022	-1.0022	-0.662799	-0.553638	85.9075	89.6557	-3.74824	-5.09036	-0.443151
		2007	17	22.4341	-5.43405	-2.41409	-1.09233	9	9.07413	-0.0741341	1.5991	1.1795	80.3492	89.3941	-9.04494	-8.29743	-0.733765
		2008	22	22.375	-0.374978	-2.35351	-1.06471	15	9.12638	5.87362	2.21402	1.65067	77.09	89.1891	-12.0991	-9.8178	-0.871536
		2009	21	22.2515	-1.2515	-0.228528	-0.0956851	10	9.15743	0.842567	1.85013	1.37184	80.7342	89.0435	-8.30936	-9.29398	-0.824069
		2010	23	22.0591	0.940892	-2.36797	-1.0713	8	9.16581	-1.16581	0.842254	0.59958	81.4867	88.9602	-7.47349	-9.44626	-0.837868
		2011	15	21.7933	-6.79331	-2.10067	-0.949405	12	9.15	2.85	1.19189	0.867484	76.3858	88.9418	-12.5559	-9.53074	-0.845524
		2012	21	21.4496	-0.449586	-1.75545	-0.79198	11	9.10852	1.89148	1.23387	0.899649	80.4283	88.9911	-8.56281	-9.59299	-0.851164
		2013	23	21.0234	1.97655	2.00553	0.923075	8	9.03987	-1.03987	0.303018	0.186401	81.4508	89.1111	-7.66023	-7.49939	-0.661449
		2014	25	20.5104	4.48962	2.18676	1.00572	9	8.94256	0.0574426	1.73416	1.28299	83.0292	89.3043	-6.27514	-2.25718	-0.186417
		2015	20	19.9059	0.0941123	0.459423	0.21803	15	8.81508	6.18492	1.19547	0.870223	96.7375	89.5737	7.16383	2.71726	0.264351
		2016	16	19.2055	-3.20546	-0.505316	-0.221904	6	8.65596	-2.65596	1.02176	0.737123	97.185	89.9219	7.26309	6.65409	0.621093
		2017	20	18.4046	1.5954	0.963713	0.447993	8	8.46368	-0.46368	-1.1188	-0.903039	95.8872	90.3518	5.53535	5.17692	0.487237
		2018	22	17.4988	4.5012	0.871017	0.405722	8	8.23676	-0.236758	-1.22471	-0.984192	93.5985	90.8662	2.73232	4.66324	0.440689
		2019	13	16.4836	-3.48355	0.221097	0.10935	5	7.97369	-2.97369	-1.29448	-1.03765	97.1898	91.4678	5.72206	3.88381	0.370059
		2020	15	15.3544	-0.354358			7	7.673	-0.672996			95.3564	92.1594	3.19704

## Sheet: Sheet2
		1967	390030	282020	261170	300240	261160	312160	263300	273070	357060	241100	257020	300260	284010	282110	263180	223020	342090	261140	284140	357040	311360	257050	252120	345040	282050	241040
		1968	344070	332010	284133	241080	255020	267040	284010	282020	266030	300260	300240	257020	357010	353060	273030	290070	284130	273070	241040	264010	284010	261160	284120	243070	263280
		1969	272020	252010	257020	300260	311020	263090	263180	354020	332010	355100	390030	290380	344040	284010	282050	264180	312160
		1970	300240	241100	257070	390030	264180	290070	284210	284010	333030	272020	300260	300130	257050	282110	343100	284070	300240	252120	264010	243030	344070	266100
		1971	383010	313010	358057	300260	266030	257020	266100	344020	241040	284010	300250	257040	344070	252010	273070	283230	376010
		1972	390030	311320	233010	282050	333020	257060	290160	257040	373010	263310	390020	357110	300260	263210
		1973	312030	282050	300240	257020	284133	290360	290120	357070	290030	243102	244000	290070	233020	257060	257070	251050	264010	311320	342090	241050	341040	282110	376010	390020	241080	255060
		1974	251070	342090	345040	312160	282050	263180	312030	264010	251020	345060	284010	261230	243100	251030	311320	257050	264250
		1975	282110	284090	311240	312030	284131	332020	390070	342090	344040	241100	257050	241080	261140	257060
		1976	344040	241100	344020	255060	284080	311161	345040	263340	300250	264250	241100	283120	313010	284120	257020	331021	332010
		1977	242050	284080	284133	332010	257040	285030	241080	263340	257020	300250	311180	342090
		1978	313020	221126	345040	290030	262000	255060	358060	285040	252120	273030	311360	284131	341040	333060	283180
		1979	283040	333060	257070	262000	261030	257060	257050	257040	243070	284133	290260	358060	263200	300250	311340	251030	284096
		1980	241100	252120	268060	300270	300250	372070	272020	311070	312030	357120	311310	300250	257050	267020	262000	332010	223020	242050	353050
		1981	373080	312030	241050	284170	290390	262000	372070	312030	311290	211060	233020	373080	284133	333060	312030
		1982	264220	283120	257050	224010	300260	311320	353020	284070	331030	267020	241040	242050	257020	284210	290390	300260	333010	261140	333060	311070	344120	223020	290390
		1983	252120	357120	283120	266010	282110	284110	333010	312030	311290	284096	312070	373010	284070	283090	283110	211060	344120	333060	258020
		1984	312070	273030	373010	357120	266100	264150	211060	357110	282110	241100	332020	223020	300250	263140	333010	233020
		1985	343100	351020	344020	284142	341040	354010	390028	285050	241100	266030	352020	300130	272020	264150	333010	252120	284100
		1986	290360	257040	284070	290260	355100	290240	224030	261160	261120	261030	284100	242050	300260	272020	311161	333060	311310	311240	266100	311360	211060	341130	284096
		1987	344020	264220	284170	311190	311070	241100	284110	341040	333060	311060	268040	345020	312070	311120	300250
		1988	353010	284170	334050	272020	344120	282110	241100	284070	273010	268060	257040	284121	282060	282030	223020	264071	357010	355100
		1989	256010	300250	283010	241100	224010	290070	223020	283090	311320	344100	351080	290380	283120	360160	357100	285050
		1990	335030	284010	334120	311020	360160	263280	233020	263340	300270	351080	342110	355040
		1991	264220	223020	311320	358057	233020	261030	267020	266030	266100	264180	264220	345020	255060	353010	300260	334050	335020	345040	341040	300100	282100	321050
		1992	300260	357120	233020	284080	273083	313040	234010	344070	267040	300250	311320	284131	241100	234010	211060	282090	334050	311340
		1993	284080	311360	272020	311310	211060	263350	311180	352080	263340	273083	211060	341021	284170	234010	311180	284130
		1994	273010	357120	300260	284130	284080	341040	263340	300250	211060	264030	351020	345040	284080	311110	355100	353040
		1995	312070	357110	282120	264030	263310	355040	360050	373030	256010	243070	311310	353010	241100
		1996	290390	223020	285070	355100	373010	311070	311190	272020	268060	334070	284170	311160	267010	257040	261120	285020	282100	300125	300130	234000	252140	242050
		1997	283090	300260	290390	283260	360101	282060	264050	311360	344020	263340	262000	284110	300270	255060	263200
		1998	357110	284080	223020	284130	353060	344100	312110	264010	300250	300270	284110	282060	261030	357110	241040	233020	345020	343100
		1999	284130	344070	263340	233020	372030	273030	282030	264250	342090	344040	315020	300270	224010	267020	264010	261030	300250	255060	300260	257060	243030	282030	357040
		2000	284110	282060	252120	285020	263350	261220	373030	311360	300260	263180	273030	357090	300060	284040	233020	262000	224010	266030	390090	266100	285030	300060	261140	241040	256010	255020	372070	284110	260010	282060	344100	255060	252120
		2001	300130	284130	284110	390081	243091	261160	284120	262000	211060	233020	257050	268030	355100	234011	344100	233020	241040	311240	344040	273030	282030	263310	284080
		2002	300260	233020	256010	263100	352010	242050	211060	357110	267010	312070	284090	251070	263350	311161	263340	252010	256010	257060	290360	343100	251020	233020	300250	360160
		2003	344100	266100	357070	268060	300250	282110	264200	344020	234010	257050	334040	264180	284200	290360	244000	252120	242050	282060	283110	266100	284130	272020
		2004	344040	373010	251020	321050	257050	300260	211060	357120	290260	342110	311161	284120	273030	267040	341090	268030	223020	233020	252120	267020	344040	255060	282060	311360	257060	355100	284080	284110	251020
		2005	300250	257030	344020	273030	344120	373030	290120	260010	353010	355100	266030	282110	284040	311240	290360	284080	311161	233020	252140	272020	341090	344020	284040
		2006	223020	251070	345040	312260	344120	252010	344040	233020	264260	233010	355100	373030	300250	273010	263250	234010	342110	252120	273030	266030	266020
		2007	344040	262000	241100	261170	312030	263340	268040	222120	344040	251070	255060	283040	290360	300260	264260	266030	344040
		2008	243120	243130	351050	373030	273030	311130	290360	352010	300250	263340	263250	260010	284040	358041	264160	268030	252070	257050	312070	282110	345040	261160
		2009	282090	263200	252010	290120	300260	221115	290240	242050	251030	284170	353010	284040	261170	262000	313030	352020	290380	283110	311240	300090	285070
		2010	263250	233020	290240	260010	311240	357040	261080	211060	267020	354020	290380	300070	311240	284193	300250	284040	282090	372020	251030	263300	223020	352080	300250
		2011	300260	358057	345020	266030	266100	222120	352090	357150	331021	351080	300260	266100	282090	221041	352080
		2012	290150	252120	263340	290390	268060	266100	344020	234010	300260	266030	241040	241080	242050	252010	264270	252080	261140	284120	264230	221020	352080
		2013	260010	263090	221020	344040	261080	211060	300260	252120	284090	263340	344020	263300	261170	312030	344100	273030	260010	251030	352090	268040	252140	341040	357090
		2014	263340	384010	390090	345070	373030	342110	354006	252140	251020	312030	264050	223020	284141	262000	263250	263180	263280	267020	344020	261140	255060	311360	263340	263250	252010
		2015	264030	252010	344100	290390	344040	300260	360160	268060	263170	222120	283110	342110	353020	273010	358020	344020	266030	300260	290290	357120
		2016	354006	252120	282110	222120	354020	233020	343100	273010	345040	233020	390080	311240	352090	343100	344090	263310
		2017	290240	282090	257030	344020	261170	252120	261140	300130	345020	267020	263200	222120	360160	282080	344020	233020	243030	260010	311300	223020
		2018	266030	252120	290200	290240	311060	290390	352090	233005	262000	353010	263250	261170	223020	233020	282090	267020	283120	343100	251002	272020	261230	256010
		2019	283110	263090	311060	354020	341040	282110	352090	233020	263310	261080	256010	267020	282050
		2020	263310	264230	255060	282050	261080	263340	345070	311240	255060	343100	233020	353010	282050	284096	311240

## Sheet: Sheet3
		1967	257040	263090	252010	343030
		1968	267030	211050	264140	373050	353010	265060	251050
		1969	255060	241040	345020	274020	284142	264100	284120
		1970	371020	264270
		1971	257060	360150	211060	342090	290380	241100	267020
		1972	255020	358060	357070	355090	334070	290390	262000	233020	353010	241080	250030
		1973	352010	332010	241100	252120	290390	332010
		1974	222120	222010	351080	300260	311120
		1975	263340
		1976	267020	284133	257050	264010	284131	341040
		1977	266110	344020	342090	282110	353010	345060	255060	257040	223020	241040
		1978	273010	272020	344120	242050
		1979	300250	345040	284132	282090	242050	311360	284120
		1980	264150	282110	257070	290270	284141
		1981	311360	282110	300250	257040	300260
		1982	312030	211060
		1983	268060	345020	284133
		1984	261140	332000	241100	257040	353010	300260	284100
		1985	241100	263090	263340	300260	264050	300250	211060
		1986	300260	311290	263200	255060
		1987	284010	311230	284070	290380	311240	283090	313020	345020
		1988	300270	211060	268070	243040	265090
		1989	311240	284080	290240
		1990	343010	354006	282030	312030	357110	300250	311320	313030
		1991	263290	263340	284130	241100	273083	264071	372070	261170
		1992	357110	357090	311300	272020	345040	263250
		1993	284120	300250	264250	243060	355160	273030	355100	351080	311320
		1994	311240	261230	252140	284120	355100	223030	262000	241100	268060	355130
		1995	300250	357090	263340	284080	241040	357120	257030	283070	341090
		1996	300260	242050	373030	241100	331031	311360
		1997	344100	283260	300250	242050	311190	311290
		1998	311360	261170	284110	352020	300260	261170	357120	242050	300250
		1999	290100	352080	284110	263350	344020	264180
		2000	263340	251020	300250	234010
		2001	284080	342110	284141	261140	223020	284040
		2002	355100	273030	352020	252140	284080	242050	282060	266100
		2003	273030	354006	263200	284211	233020	352020	357110	272020
		2004	352010	282030	266030	351080	234070	261170	360050	312070
		2005	252070	233020	284130	284130	233010	360050	252120	264160
		2006	257040	284040	243080	273030	267020	345040	284200	242030
		2007	263280	351080	221010	252080	252120	257050	344120	233010	242050
		2008	221060	233020	256010	282090	311290	344040	266030	257040	211060	261170	267020	357110	252120	284200	344120
		2009	233020	311240	257020	311240	243040	357070	242010	263200	345040	267020
		2010	262000	251020	252140	290270	344020	252120	344120	345040
		2011	383020	344020	261140	252010	311240	282110	263300	252140	344040	345070	263310	300230
		2012	241080	357120	345020	261140	290070	344100	311110	251030	345070	261170	268060
		2013	264250	357120	312070	345070	355100	263090	290070	344020
		2014	290260	312030	264180	282110	273030	357090	233020	300120	282110
		2015	355100	243060	357090	352050	343100	264270	354006	345020	266100	331021	345070	233020	343100	352090	268060
		2016	300130	290360	344020	290360	266030	261140
		2017	264050	233020	273010	284096	345040	300010	262000	343100
		2018	260010	353050	344040	311120	252120	300130	263200	273030
		2019	252120	290240	300130	345040	357040
		2020	332010	233020	357090	282060	300130	241040	311060

## Sheet: Sheet4
																																			252120
																																			255060
																																			344100
																																			282060
																																			260010				251020
																																			284110				284110
																																			372070				284080
		241040						255060																											255020				355100
		282050	263280					241080																											256010				257060										252010
		345040	243070					390020																											241040		360160		311360										263250
		252120	284120					376010									290390				284096													357040	261140	284080	300250		282060	284040					300250			357090	263340
		257050	261160		266100			282110									223020				341130					321050					242050			282030	300060	263310	233020	272020	255060	344020			261160		352080			341040	311360
		311360	284010		344070			341040									344120				211060					282100					252140			243030	285030	282030	251020	284130	344040	341090	266020		345040	285070	223020		352080	252140	255060
		357040	264010		243030			241050									311070				311360					300100					234000			257060	266100	273030	343100	266100	267020	272020	266030		282110	300090	263300		221020	268040	261140
		284140	241040		264010			342090							353050		333060	258020			266100					341040					300130			300260	390090	344040	290360	283110	252120	252140	273030		312070	311240	251030		264230	352090	344020
		261140	273070		252120			311320							242050		261140	333060			311240		355100			345040	311340				300125		343100	255060	266030	311240	257060	282060	233020	233020	252120		257050	283110	372020		284120	251030	267020
		342090	284130	312160	300240	376010		264010	264250		332010			284096	223020		333010	344120		284100	311310		357010			335020	334050				282100		345020	300250	224010	241040	256010	242050	223020	311161	342110	344040	252070	290380	282090		261140	260010	263280
		223020	290070	264180	284070	283230		251050	257050		331021			251030	332010		300260	211060	233020	252120	333060		264071	285050		334050	282090	284130	353040		285020		233020	261030	262000	233020	252010	252120	268030	284080	234010	266030	268030	352020	284040		252080	273030	263180
		263180	273030	282050	343100	273070		257070	311320		257020		283180	311340	262000	312030	290390	283110	333010	333010	311161	300250	223020	357100		300260	211060	311180	355100		261120	263200	241040	264010	233020	344100	263340	244000	341090	290360	263250	264260	264160	313030	300250	352080	264270	344100	263250
		282110	353060	284010	282110	252010	263210	257060	251030	257060	284120		333060	300250	267020	333060	284210	283090	263140	264150	272020	311120	282030	360160		353010	234010	234010	311110		257040	255060	357110	267020	284040	234011	311161	290360	267040	311240	273010	300260	358041	262000	284193	221041	252010	312030	262000
		284010	357010	344040	257050	344070	300260	233020	243100	261140	313010		341040	263200	257050	284133	257020	284070	300250	272020	300260	312070	282060	283120		255060	241100	284170	284080	241100	267010	300270	261030	224010	300060	355100	263350	284200	273030	284040	300250	290360	284040	261170	311240	282090	242050	261170	284141
		300260	257020	290380	300130	257040	357110	290070	261230	241080	283120	342090	284131	358060	300250	373080	242050	373010	223020	300130	242050	345020	284121	290380	355040	345020	284131	341021	345040	353010	311160	284110	282060	300270	357090	268030	251070	264180	284120	282110	373030	283040	260010	284040	300070	266100	241080	263300	223020
		257020	300240	390030	300260	300250	390020	244000	284010	257050	241100	311180	311360	290260	311310	233020	241040	312070	332020	352020	284100	268040	257040	351080	342110	264220	311320	211060	351020	311310	284170	262000	284110	315020	273030	257050	284090	334040	311161	266030	355100	255060	263250	353010	290380	300260	241040	344020	264050
		241100	300260	355100	272020	284010	263310	243102	345060	241100	264250	300250	273030	284133	357120	211060	267020	284096	241100	266030	261030	311060	268060	344100	351080	264180	300250	273083	264030	243070	334070	263340	300270	344040	263180	233020	312070	257050	342110	355100	233010	251070	263340	284170	354020	351080	266030	263340	312030
		357060	266030	332010	333030	241040	373010	290030	251020	344040	300250	257020	252120	243070	312030	311290	331030	311290	282110	241100	261120	333060	273010	311320	300270	266100	267040	263340	211060	256010	268060	344020	300250	342090	300260	211060	267010	234010	290260	353010	264260	344040	300250	251030	267020	331021	300260	284090	251020
		273070	282020	354020	284010	344020	257040	357070	264010	342090	263340	263340	285040	257040	311070	312030	284070	312030	357110	285050	261160	341040	284070	283090	263340	266030	344070	352080	300250	373030	272020	311360	264010	264250	311360	262000	357110	344020	357120	260010	233020	222120	352010	242050	211060	357150	234010	252120	252140
		263300	284010	263180	284210	266100	290160	290120	312030	390070	345040	241080	358060	257050	272020	372070	353020	333010	211060	390028	224030	284110	241100	223020	233020	267020	234010	311180	263340	360050	311190	264050	312110	282030	373030	284120	211060	264200	211060	290120	344040	268040	290360	290240	261080	352090	344020	300260	354006
		312160	267040	263090	290070	257020	257060	290360	263180	332020	311161	285030	255060	257060	372070	262000	311320	284110	264150	354010	290240	241100	282110	290070	263280	261030	313040	263350	341040	355040	311070	282060	344100	273030	261220	261160	242050	282110	300260	373030	252010	263340	311130	221115	357040	222120	266100	211060	342110
		261160	255020	311020	264180	266030	333020	284133	282050	284131	284080	257040	262000	261030	300250	290390	300260	282110	266100	341040	355100	311070	344120	224010	360160	233020	273083	211060	284080	263310	373010	360101	353060	372030	263350	243091	352010	300250	257050	344120	344120	312030	273030	300260	311240	266100	268060	261080	373030
		300240	241080	300260	390030	300260	282050	257020	312160	312030	255060	332010	290030	262000	300270	284170	224010	266010	357120	284142	290260	311190	272020	241100	311020	358057	284080	311310	284130	264030	355100	283260	284130	233020	285020	390081	263100	268060	321050	273030	312260	261170	373030	290120	260010	266030	290390	344040	345070
		261170	284133	257020	257070	358057	233010	300240	345040	311240	344020	284133	345040	257070	268060	241050	257050	283120	373010	344020	284070	284170	334050	283010	334120	311320	233020	272020	300260	282120	285070	290390	223020	263340	252120	284110	256010	357070	251020	344020	345040	241100	351050	252010	290240	345020	263340	221020	390090
		282020	332010	252010	241100	313010	311320	282050	342090	284090	241100	284080	221126	333060	252120	312030	283120	357120	273030	351020	257040	264220	284170	300250	284010	223020	357120	311360	357120	357110	223020	300260	284080	344070	282060	284130	233020	266100	373010	257030	251070	262000	243130	263200	233020	358057	252120	263090	384010
		390030	344070	272020	300240	383010	390030	312030	251070	282110	344040	242050	313020	283040	241100	373080	264220	252120	312070	343100	290360	344020	353010	256010	335030	264220	300260	284080	273010	312070	290390	283090	357110	284130	284110	300130	300260	344100	344040	300250	223020	344040	243120	282090	263250	300260	290150	260010	263340
		1967	1968	1969	1970	1971	1972	1973	1974	1975	1976	1977	1978	1979	1980	1981	1982	1983	1984	1985	1986	1987	1988	1989	1990	1991	1992	1993	1994	1995	1996	1997	1998	1999	2000	2001	2002	2003	2004	2005	2006	2007	2008	2009	2010	2011	2012	2013	2014
[truncated: 6 more columns]

## Sheet: Sheet5
																																											344120
																																											284200
																																											252120
																																											357110			300230
							250030																																				267020			263310	268060
							241080					241040																	355130														261170	267020		345070	261170
							353010					223020																311320	268060	341090			300250									242050	211060	345040		344040	345070		282110
							233020					257040										345020			313030	261170		351080	241100	283070			242050				266100	272020	312070	264160	242030	233010	257040	263200	345040	252140	251030	344020	300120
			251050	284120		267020	262000					255060		284120					284100	211060		313020			311320	372070		355100	262000	257030			357120				282060	357110	360050	252120	284200	344120	266030	242010	344120	263300	311110	290070	233020
			265060	264100		241100	290390	332010			341040	345060		311360					300260	300250		283090			300250	264071	263250	273030	223030	357120	311360	311290	261170	264180		284040	242050	352020	261170	360050	345040	257050	344040	357070	252120	282110	344100	263090	357090
			353010	284142		290380	334070	290390	311120		284131	353010		242050	284141	300260			353010	264050		311240	265090		357110	273083	345040	355160	355100	241040	331031	311190	300260	344020		223020	284080	233020	234070	233010	267020	252120	311290	243040	344020	311240	290070	355100	273030
		343030	373050	274020		342090	355090	252120	300260		264010	282110	242050	282090	290270	257040			257040	300260	255060	290380	243040		312030	241100	272020	243060	284120	284080	241100	242050	352020	263350	234010	261140	252140	284211	351080	284130	273030	252080	282090	311240	290270	252010	261140	345070	282110
		252010	264140	345020		211060	357070	241100	351080		257050	342090	344120	284132	257070	300250		284133	241100	263340	263200	284070	268070	290240	282030	284130	311300	264250	252140	263340	373030	300250	284110	284110	300250	284141	352020	263200	266030	284130	243080	221010	256010	257020	252140	261140	345020	312070	264180
		263090	211050	241040	264270	360150	358060	332010	222010		284133	344020	272020	345040	282110	282110	211060	345020	332000	263090	311290	311230	211060	284080	354006	263340	357090	300250	261230	357090	242050	283260	261170	352080	251020	342110	273030	354006	282030	233020	284040	351080	233020	311240	251020	344020	357120	357120	312030
		257040	267030	255060	371020	257060	255020	352010	222120	263340	267020	266110	273010	300250	264150	311360	312030	268060	261140	241100	300260	284010	300270	311240	343010	263290	357110	284120	311240	300250	300260	344100	311360	290100	263340	284080	355100	273030	352010	252070	257040	263280	221060	233020	262000	383020	241080	264250	290260
		1967	1968	1969	1970	1971	1972	1973	1974	1975	1976	1977	1978	1979	1980	1981	1982	1983	1984	1985	1986	1987	1988	1989	1990	1991	1992	1993	1994	1995	1996	1997	1998	1999	2000	2001	2002	2003	2004	2005	2006	2007	2008	2009	2010	2011	2012	2013	2014
[truncated: 6 more columns]
