# Supplementary material for: Clear anti-phase tendency of volcanic eruptions and consistent U.S. Dollar Index response to volcanic forcing
Source: Research Square preprint supplement (doi:10.21203/rs.3.rs-602091/v1), 2021-07-12
Supplement: Supplementary file 7 [file savMXNdata70.xlsx]

## Sheet: Sheet1
				-0.000593202					-6.26509e-05					0.000463469
				0.0490903					0.0059635					-0.028686
				-1.08356					-0.154546					-0.218809
				22.3993					2.46109					114.644
		Year	Raw	Trend	Detrend	MA3	z-score	Raw	Trend	Detrend	MA3	z-score	Raw	Trend	Detrend	MA3	z-score
		1967	25	21.3642	3.63578			2	2.31245	-0.312448			119.955	114.397	5.5584
		1968	24	20.4238	3.57622	1.21253	0.643365	2	2.17535	-0.175354	-0.512412	-0.747671	122.058	114.095	7.96335	7.39146	0.687911
		1969	16	19.5744	-3.5744	0.729761	0.395139	1	2.04944	-1.04944	-0.719702	-1.04723	122.394	113.742	8.65262	8.11396	0.753382
		1970	21	18.8125	2.18747	-1.17385	-0.583634	1	1.93432	-0.934316	-0.604457	-0.880686	121.065	113.339	7.72592	6.98161	0.650772
		1971	16	18.1346	-2.1346	-2.1614	-1.0914	2	1.82962	0.17038	-0.166303	-0.247502	117.457	112.89	4.5663	2.9919	0.289237
		1972	11	17.5371	-6.53706	-0.896	-0.440774	2	1.73497	0.265028	-0.0715291	-0.110542	109.082	112.398	-3.31653	-3.95824	-0.340562
		1973	23	17.0163	5.98366	-1.37409	-0.686594	1	1.65	-0.649995	0.68024	0.975852	98.7408	111.865	-13.1245	-8.93463	-0.791506
		1974	13	16.5689	-3.56888	-0.258787	-0.11314	4	1.57431	2.42569	0.0893795	0.121989	100.932	111.295	-10.3629	-11.802	-1.05134
		1975	13	16.1911	-3.19114	-2.54652	-1.28942	0	1.50755	-1.50755	0.4896	0.700354	98.77	110.689	-11.9187	-8.89065	-0.787521
		1976	15	15.8795	-0.879539	-3.23374	-1.64276	2	1.44933	0.550665	1.21461	1.74808	105.66	110.05	-4.39041	-7.56222	-0.667143
		1977	10	15.6305	-5.63053	-2.31687	-1.17134	6	1.39929	4.60071	1.59812	2.30229	103.005	109.383	-6.37761	-9.28396	-0.823161
		1978	15	15.4405	-0.440547	-2.1257	-1.07305	1	1.35703	-0.357028	1.6405	2.36354	91.6042	108.688	-17.0838	-14.4925	-1.29514
		1979	15	15.306	-0.306035	0.343328	0.196448	2	1.32219	0.677814	0.342134	0.487249	87.9533	107.969	-20.0161	-18.8504	-1.69004
		1980	17	15.2234	1.77657	0.0937823	0.06814	2	1.29438	0.705615	0.37006	0.527606	87.7783	107.23	-19.4513	-14.0379	-1.25395
		1981	14	15.1892	-1.18918	2.79588	1.45747	1	1.27325	-0.273248	-0.275344	-0.405079	103.825	106.471	-2.64636	-3.61642	-0.309587
		1982	23	15.1997	7.80027	3.11986	1.62405	0	1.2584	-1.2584	-0.927037	-1.34685	116.946	105.697	11.2484	9.93213	0.918138
		1983	18	15.2515	2.7485	3.73594	1.94082	0	1.24946	-1.24946	-0.917976	-1.33376	126.105	104.911	21.1943	22.521	2.05891
		1984	16	15.341	0.659047	0.981009	0.524323	1	1.24606	-0.246064	-0.581118	-0.846958	139.234	104.114	35.1204	31.3265	2.85682
		1985	15	15.4645	-0.464517	2.5253	1.31835	1	1.24783	-0.247826	-0.582754	-0.849322	140.974	103.31	37.6646	27.3275	2.49445
		1986	23	15.6186	7.38136	2.03903	1.06832	0	1.25437	-1.25437	-0.589175	-0.858601	111.698	102.501	9.19752	13.8309	1.27143
		1987	15	15.7998	-0.799753	2.8591	1.48998	1	1.26533	-0.265327	-0.600004	-0.874251	96.3208	101.69	-5.36948	-1.36121	-0.105227
		1988	18	16.0043	1.99569	0.322401	0.185688	1	1.28031	-0.280315	-0.281534	-0.414024	92.9692	100.881	-7.91167	-5.01155	-0.436009
		1989	16	16.2287	-0.228737	-1.23418	-0.614653	1	1.29896	-0.29896	0.0332798	0.0409187	98.3217	100.075	-1.7535	-6.59598	-0.579585
		1990	11	16.4695	-5.46949	-0.47374	-0.223661	2	1.32089	0.679114	0.0114788	0.00941368	89.1533	99.2761	-10.1228	-6.67171	-0.586448
		1991	21	16.723	4.277	-1.39273	-0.696176	1	1.34572	-0.345718	0.320106	0.455416	90.3475	98.4864	-8.13887	-9.50654	-0.84333
		1992	14	16.9857	-2.9857	-0.654251	-0.316475	2	1.37308	0.626921	-0.0404631	-0.0656484	87.4508	97.7088	-10.258	-7.09656	-0.624946
		1993	14	17.2541	-3.25405	-2.58808	-1.31079	1	1.40259	-0.402593	0.596814	0.855292	94.0533	96.9462	-2.89284	-6.16347	-0.540392
		1994	16	17.5245	-1.52449	-3.52399	-1.792	3	1.43388	1.56612	0.565648	0.810253	90.8617	96.2012	-5.33958	-6.56947	-0.577183
		1995	12	17.7934	-5.79344	-1.45843	-0.729956	2	1.46658	0.533421	0.53308	0.763188	84.0008	95.4768	-11.476	-8.12874	-0.718478
		1996	21	18.0574	2.94264	-2.05449	-1.03643	1	1.5003	-0.500298	0.166152	0.232935	87.205	94.7756	-7.57065	-5.5585	-0.485572
		1997	15	18.3127	-3.31268	-0.64196	-0.310155	2	1.53467	0.465333	-0.201425	-0.298257	96.4717	94.1005	2.37113	-0.00126131	0.0180069
		1998	17	18.5558	-1.55585	-0.550607	-0.263184	1	1.56931	-0.56931	-0.569276	-0.829845	98.65	93.4543	5.19574	4.92131	0.464074
		1999	22	18.7833	3.2167	3.88979	2.01993	0	1.60385	-1.60385	-0.937025	-1.36129	100.037	92.8396	7.19707	9.94588	0.919385
		2000	29	18.9915	10.0085	4.34947	2.25628	1	1.63791	-0.637915	-0.970963	-1.41033	109.704	92.2593	17.4448	16.1933	1.4855
		2001	19	19.1768	-0.176821	2.83198	1.47603	1	1.67112	-0.671124	-0.670714	-0.976435	115.654	91.7162	23.9379	20.346	1.86181
		2002	18	19.3358	-1.33577	-0.992458	-0.490369	1	1.7031	-0.703104	-1.0359	-1.50417	110.868	91.2131	19.6552	16.0649	1.47387
		2003	18	19.4648	-1.46478	0.21306	0.129469	0	1.73348	-1.73348	-0.732818	-1.06618	95.3542	90.7527	4.60146	7.02546	0.654745
		2004	23	19.5603	3.43973	0.452088	0.252369	2	1.76187	0.238129	-0.427752	-0.625326	87.1575	90.3378	-3.18032	-0.352258	-0.0137993
		2005	19	19.6187	-0.618691	0.0615184	0.0515509	2	1.78791	0.212094	0.213005	0.300642	87.4933	89.9712	-2.47791	-3.13549	-0.266007
		2006	17	19.6365	-2.63648	-2.28842	-1.15671	2	1.81121	0.188792	0.189828	0.267149	85.9075	89.6557	-3.74824	-5.09036	-0.443151
		2007	16	19.6101	-3.61009	-1.59417	-0.799752	2	1.8314	0.168599	0.836427	1.20156	80.3492	89.3941	-9.04494	-8.29743	-0.733765
		2008	21	19.5359	1.46405	-1.18551	-0.589632	4	1.84811	2.15189	0.819845	1.1776	77.09	89.1891	-12.0991	-9.8178	-0.871536
		2009	18	19.4105	-1.4105	0.274456	0.161036	2	1.86096	0.139044	1.14046	1.64092	80.7342	89.0435	-8.30936	-9.29398	-0.824069
		2010	20	19.2302	0.769815	-1.87738	-0.945366	3	1.86957	1.13043	0.798639	1.14695	81.4867	88.9602	-7.47349	-9.44626	-0.837868
		2011	14	18.9914	-4.99145	-1.97079	-0.993393	3	1.87356	1.12644	1.1281	1.62306	76.3858	88.9418	-12.5559	-9.53074	-0.845524
		2012	17	18.6907	-1.69072	-1.33554	-0.666772	3	1.87257	1.12743	0.462551	0.661266	80.4283	88.9911	-8.56281	-9.59299	-0.851164
		2013	21	18.3245	2.67554	1.69858	0.893273	1	1.86621	-0.866214	0.469033	0.670633	81.4508	89.1111	-7.66023	-7.49939	-0.661449
		2014	22	17.8891	4.11091	2.46847	1.28913	3	1.85412	1.14588	0.147922	0.20659	83.0292	89.3043	-6.27514	-2.25718	-0.186417
		2015	18	17.3811	0.618944	0.644351	0.351224	2	1.8359	0.164096	0.16626	0.233091	96.7375	89.5737	7.16383	2.71726	0.264351
		2016	14	16.7968	-2.7968	-0.103544	-0.0333189	1	1.8112	-0.811198	-0.142242	-0.212731	97.185	89.9219	7.26309	6.65409	0.621093
		2017	18	16.1328	1.86723	1.22834	0.651493	2	1.77962	0.220376	-0.777209	-1.13033	95.8872	90.3518	5.53535	5.17692	0.487237
		2018	20	15.3854	4.6146	0.976899	0.52221	0	1.74081	-1.74081	-0.738266	-1.07405	93.5985	90.8662	2.73232	4.66324	0.440689
		2019	11	14.5511	-3.55113	0.145689	0.0948288	1	1.69437	-0.694367	-0.691702	-1.00677	97.1898	91.4678	5.72206	3.88381	0.370059
		2020	13	13.6264	-0.626402			2	1.63993	0.360067			95.3564	92.1594	3.19704

## Sheet: Sheet2
		1967	390030	282020	261170	300240	261160	312160	263300	273070	357060	241100	257020	300260	284010	282110	263180	223020	342090	261140	284140	357040	311360	257050	252120	282050	241040
		1968	344070	332010	284133	241080	255020	267040	284010	282020	266030	300260	300240	257020	357010	353060	273030	290070	284130	241040	264010	284010	261160	284120	243070	263280
		1969	272020	252010	257020	300260	263090	263180	354020	332010	355100	390030	290380	344040	284010	282050	264180	312160
		1970	300240	241100	257070	390030	264180	290070	284210	284010	333030	272020	300260	300130	257050	343100	284070	300240	252120	264010	243030	344070	266100
		1971	383010	313010	358057	300260	266030	257020	266100	344020	241040	284010	300250	257040	344070	252010	283230	376010
		1972	390030	233010	282050	333020	257060	290160	373010	263310	390020	357110	300260
		1973	312030	282050	300240	257020	284133	290360	290120	357070	290030	243102	244000	290070	233020	257060	257070	311320	342090	241050	282110	376010	390020	241080	255060
		1974	342090	312160	282050	263180	312030	264010	251020	345060	284010	243100	251030	311320	264250
		1975	282110	284090	312030	284131	332020	390070	342090	344040	241100	257050	241080	261140	257060
		1976	344040	344020	255060	284080	311161	345040	263340	300250	264250	241100	283120	313010	284120	257020	331021
		1977	242050	284080	332010	257040	285030	241080	263340	257020	300250	311180
		1978	313020	221126	345040	290030	262000	255060	358060	285040	252120	273030	311360	284131	341040	333060	283180
		1979	283040	333060	257070	262000	261030	257060	257050	257040	243070	284133	358060	263200	300250	311340	251030
		1980	241100	252120	268060	300270	372070	272020	311070	312030	357120	311310	300250	257050	267020	262000	332010	223020	242050
		1981	373080	312030	241050	284170	290390	262000	372070	312030	311290	211060	233020	373080	333060	312030
		1982	264220	283120	257050	224010	300260	311320	353020	284070	331030	267020	241040	242050	257020	284210	290390	300260	333010	261140	333060	311070	344120	223020	290390
		1983	252120	283120	266010	282110	284110	333010	312030	311290	284096	312070	373010	284070	283090	283110	211060	344120	333060	258020
		1984	312070	273030	373010	357120	266100	264150	211060	357110	282110	241100	332020	223020	300250	263140	333010	233020
		1985	343100	351020	344020	284142	341040	354010	390028	285050	241100	352020	300130	272020	264150	333010	252120
		1986	290360	257040	284070	290260	355100	290240	224030	261160	261120	261030	284100	242050	300260	272020	311161	333060	311310	311240	266100	311360	211060	341130	284096
		1987	344020	264220	284170	311190	311070	241100	284110	341040	333060	311060	268040	345020	312070	311120	300250
		1988	353010	284170	334050	272020	344120	282110	241100	284070	273010	268060	257040	284121	282060	282030	223020	264071	357010	355100
		1989	256010	300250	283010	241100	224010	290070	223020	283090	311320	344100	351080	290380	283120	360160	357100	285050
		1990	335030	284010	334120	311020	360160	263280	233020	263340	300270	342110	355040
		1991	264220	223020	311320	358057	233020	267020	266030	266100	264180	264220	345020	255060	353010	300260	334050	335020	345040	341040	300100	282100	321050
		1992	357120	233020	284080	313040	234010	344070	300250	311320	284131	241100	234010	211060	282090	311340
		1993	311360	272020	311310	211060	263350	311180	352080	263340	273083	211060	341021	284170	234010	311180
		1994	273010	357120	300260	284130	284080	341040	263340	300250	211060	264030	351020	345040	284080	311110	355100	353040
		1995	357110	282120	264030	263310	355040	360050	373030	256010	243070	311310	353010	241100
		1996	290390	223020	355100	373010	311070	311190	272020	268060	334070	284170	311160	267010	257040	261120	285020	282100	300125	300130	234000	252140	242050
		1997	283090	300260	290390	283260	360101	282060	264050	311360	344020	263340	262000	284110	300270	255060	263200
		1998	357110	284080	223020	284130	353060	344100	312110	264010	300250	300270	284110	282060	261030	357110	241040	233020	345020
		1999	284130	344070	263340	233020	372030	273030	264250	342090	344040	315020	300270	224010	267020	264010	261030	300250	255060	300260	257060	243030	282030	357040
		2000	284110	282060	252120	285020	263350	261220	373030	311360	300260	263180	273030	357090	300060	284040	233020	262000	224010	266100	285030	300060	261140	241040	256010	255020	284110	282060	344100	255060	252120
		2001	300130	284130	284110	390081	243091	261160	284120	262000	211060	233020	257050	234011	344100	241040	311240	273030	282030	263310	284080
		2002	300260	233020	256010	263100	352010	211060	267010	312070	284090	251070	263350	263340	252010	257060	290360	343100	251020	233020
		2003	344100	266100	268060	300250	282110	264200	344020	234010	257050	334040	290360	252120	242050	282060	283110	266100	284130	272020
		2004	344040	257050	300260	211060	357120	290260	342110	311161	284120	267040	341090	268030	223020	233020	252120	344040	255060	282060	311360	257060	355100	284110	251020
		2005	300250	257030	344020	344120	373030	290120	353010	355100	266030	284040	311240	290360	284080	311161	233020	272020	341090	344020	284040
		2006	223020	251070	312260	344120	252010	344040	233010	355100	373030	300250	273010	263250	234010	342110	252120	266030	266020
		2007	344040	262000	241100	261170	312030	263340	268040	222120	344040	251070	283040	290360	300260	264260	266030	344040
		2008	243120	243130	351050	373030	311130	290360	352010	300250	263340	263250	260010	284040	358041	264160	268030	252070	257050	312070	282110	345040	261160
		2009	282090	263200	290120	221115	290240	242050	251030	284170	353010	261170	262000	313030	352020	290380	283110	311240	300090	285070
		2010	263250	233020	290240	260010	311240	261080	211060	267020	290380	300070	311240	284193	300250	284040	282090	372020	251030	263300	352080	300250
		2011	300260	358057	345020	266030	266100	352090	357150	331021	351080	300260	266100	282090	221041	352080
		2012	252120	263340	290390	268060	266100	344020	234010	300260	266030	241080	242050	252010	252080	261140	284120	264230	352080
		2013	260010	263090	344040	261080	211060	300260	252120	284090	263340	344020	263300	261170	312030	344100	273030	260010	251030	352090	268040	252140	357090
		2014	263340	384010	390090	345070	373030	342110	354006	252140	251020	223020	284141	262000	263250	263180	263280	344020	261140	255060	311360	263340	263250	252010
		2015	264030	252010	344100	290390	300260	360160	268060	263170	222120	283110	342110	353020	273010	358020	344020	266030	290290	357120
		2016	354006	252120	282110	222120	354020	233020	273010	345040	233020	390080	352090	343100	344090	263310
		2017	290240	282090	257030	344020	261170	252120	261140	345020	267020	263200	222120	360160	282080	344020	233020	243030	260010	223020
		2018	266030	252120	290200	290240	311060	290390	352090	233005	262000	263250	261170	223020	233020	282090	283120	343100	251002	272020	261230	256010
		2019	283110	263090	311060	354020	341040	352090	233020	263310	256010	267020	282050
		2020	263310	264230	282050	261080	263340	345070	311240	255060	343100	233020	353010	284096	311240

## Sheet: Sheet3
		1967	263090	343030
		1968	211050	264140
		1969	284142
		1970	264270
		1971	211060	342090
		1972	357070	250030
		1973	332010
		1974	222120	222010	300260	311120
		1975
		1976	257050	264010
		1977	266110	344020	282110	255060	257040	241040
		1978	273010
		1979	284132	242050
		1980	264150	257070
		1981	257040
		1982
		1983
		1984	261140
		1985	300260
		1986
		1987	283090
		1988	300270
		1989	290240
		1990	300250	313030
		1991	372070
		1992	357110	263250
		1993	311320
		1994	261230	241100	268060
		1995	241040	283070
		1996	331031
		1997	344100	283260
		1998	311360
		1999
		2000	234010
		2001	284080
		2002	242050
		2003
		2004	234070	312070
		2005	252070	252120
		2006	284040	242030
		2007	252080	233010
		2008	233020	282090	252120	284200
		2009	257020	267020
		2010	252140	290270	344120
		2011	261140	344040	300230
		2012	344100	251030	261170
		2013	355100
		2014	312030	264180	282110
		2015	354006	343100
		2016	344020
		2017	300010	262000
		2018
		2019	357040
		2020	332010	282060

## Sheet: Sheet4
																																			252120
																																			255060
																																			344100
																																			282060
		241040																																	284110
		282050	263280																																255020
		252120	243070					255060									290390				284096														256010				251020
		257050	284120					241080									223020				341130													357040	241040				284110										252010
		311360	261160		266100			390020									344120				211060					321050					242050			282030	261140				355100				261160					357090	263250
		357040	284010		344070			376010									311070				311360					282100					252140			243030	300060				257060				345040		300250			252140	263340
		284140	264010		243030			282110									333060				266100					300100					234000			257060	285030	284080			311360	284040			282110		352080			268040	311360
		261140	241040		264010			241050									261140	258020			311240		355100			341040					300130			300260	266100	263310	233020	272020	282060	344020			312070	285070	263300			352090	255060
		342090	284130		252120			342090							242050		333010	333060			311310		357010			345040					300125		345020	255060	224010	282030	251020	284130	255060	341090	266020		257050	300090	251030		352080	251030	261140
		223020	290070	312160	300240	376010		311320							223020		300260	344120	233020		333060		264071	285050		335020			353040		282100		233020	300250	262000	273030	343100	266100	344040	272020	266030	344040	252070	311240	372020		264230	260010	344020
		263180	273030	264180	284070	283230		257070			331021		283180	251030	332010		290390	211060	333010	252120	311161	300250	223020	357100		334050			355100		285020	263200	241040	261030	233020	311240	290360	283110	252120	233020	252120	266030	268030	283110	282090		284120	273030	263280
		282110	353060	282050	343100	252010		257060			257020		333060	311340	262000	312030	284210	283110	263140	333010	272020	311120	282030	360160		300260	311340	311180	311110		261120	255060	357110	264010	284040	241040	257060	282060	233020	311161	342110	264260	264160	290380	284040	352080	261140	344100	263180
		284010	357010	284010	257050	344070		233020	264250	257060	284120		341040	300250	267020	333060	257020	283090	300250	264150	300260	312070	282060	283120		353010	282090	234010	284080		257040	300270	261030	267020	300060	344100	252010	242050	223020	284080	234010	300260	358041	352020	300250	221041	252080	312030	263250
		300260	257020	344040	300130	257040		290070	311320	261140	313010		284131	263200	257050	373080	242050	284070	223020	272020	242050	345020	284121	290380		255060	211060	284170	345040	241100	267010	284110	282060	224010	357090	234011	263340	252120	268030	290360	263250	290360	284040	313030	284193	282090	252010	261170	262000
		257020	300240	290380	300260	300250	300260	244000	251030	241080	283120		311360	358060	300250	233020	241040	373010	332020	300130	284100	268040	257040	351080	355040	345020	234010	341021	351020	353010	311160	262000	284110	300270	273030	257050	263350	290360	341090	311240	273010	283040	260010	262000	311240	266100	242050	263300	284141
		241100	300260	390030	272020	284010	357110	243102	243100	257050	241100	311180	273030	284133	311310	211060	267020	312070	241100	352020	261030	311060	268060	344100	342110	264220	241100	211060	264030	311310	284170	263340	300270	315020	263180	233020	251070	334040	267040	284040	300250	251070	263250	261170	300070	300260	241080	344020	223020
		357060	266030	355100	333030	241040	390020	290030	284010	241100	264250	300250	252120	243070	357120	311290	331030	284096	282110	241100	261120	333060	273010	311320	300270	264180	284131	273083	211060	243070	334070	344020	300250	344040	300260	211060	284090	257050	284120	266030	373030	344040	263340	353010	290380	351080	266030	263340	251020
		273070	282020	332010	284010	344020	263310	357070	345060	344040	300250	257020	285040	257040	312030	312030	284070	311290	357110	285050	261160	341040	284070	283090	263340	266100	311320	263340	300250	256010	268060	311360	264010	342090	311360	262000	312070	234010	311161	355100	355100	222120	300250	284170	267020	331021	300260	284090	252140
		263300	284010	354020	284210	266100	373010	290120	251020	342090	263340	263340	358060	257050	311070	372070	353020	312030	211060	390028	224030	284110	241100	223020	233020	266030	300250	352080	263340	373030	272020	264050	312110	264250	373030	284120	267010	344020	342110	353010	233010	268040	352010	251030	211060	357150	234010	252120	354006
		312160	267040	263180	290070	257020	290160	290360	264010	390070	345040	241080	255060	257060	272020	262000	311320	333010	264150	354010	290240	241100	282110	290070	263280	267020	344070	311180	341040	360050	311190	282060	344100	273030	261220	261160	211060	264200	290260	290120	344040	263340	290360	242050	261080	352090	344020	300260	342110
		261160	255020	263090	264180	266030	257060	284133	312030	332020	311161	285030	262000	261030	372070	290390	300260	284110	266100	341040	355100	311070	344120	224010	360160	233020	234010	263350	284080	355040	311070	360101	353060	372030	263350	243091	352010	282110	357120	373030	252010	312030	311130	290240	311240	266100	266100	211060	373030
		300240	241080	300260	390030	300260	333020	257020	263180	284131	284080	257040	290030	262000	300270	284170	224010	282110	357120	284142	290260	311190	272020	241100	311020	358057	313040	211060	284130	263310	373010	283260	284130	233020	285020	390081	263100	300250	211060	344120	344120	261170	373030	221115	260010	266030	268060	261080	345070
		261170	284133	257020	257070	358057	282050	300240	282050	312030	255060	332010	345040	257070	268060	241050	257050	266010	373010	344020	284070	284170	334050	283010	334120	311320	284080	311310	300260	264030	355100	290390	223020	263340	252120	284110	256010	268060	300260	344020	312260	241100	351050	290120	290240	345020	290390	344040	390090
		282020	332010	252010	241100	313010	233010	282050	312160	284090	344020	284080	221126	333060	252120	312030	283120	283120	273030	351020	257040	264220	284170	300250	284010	223020	233020	272020	357120	282120	223020	300260	284080	344070	282060	284130	233020	266100	257050	257030	251070	262000	243130	263200	233020	358057	263340	263090	384010
		390030	344070	272020	300240	383010	390030	312030	342090	282110	344040	242050	313020	283040	241100	373080	264220	252120	312070	343100	290360	344020	353010	256010	335030	264220	357120	311360	273010	357110	290390	283090	357110	284130	284110	300130	300260	344100	344040	300250	223020	344040	243120	282090	263250	300260	252120	260010	263340
		1967	1968	1969	1970	1971	1972	1973	1974	1975	1976	1977	1978	1979	1980	1981	1982	1983	1984	1985	1986	1987	1988	1989	1990	1991	1992	1993	1994	1995	1996	1997	1998	1999	2000	2001	2002	2003	2004	2005	2006	2007	2008	2009	2010	2011	2012	2013	2014
[truncated: 6 more columns]

## Sheet: Sheet5
												241040
												257040
									311120			255060																															284200
									300260			282110																	268060														252120		344120	300230	261170		282110
		343030	264140			342090	250030		222010		264010	344020		242050	257070										313030		263250		241100	283070		283260							312070	252120	242030	233010	282090	267020	290270	344040	251030		264180
		263090	211050	284142	264270	211060	357070	332010	222120		257050	266110	273010	284132	264150	257040			261140	300260		283090	300270	290240	300250	372070	357110	311320	261230	241040	331031	344100	311360		234010	284080	242050		234070	252070	284040	252080	233020	257020	252140	261140	344100	355100	312030
		1967	1968	1969	1970	1971	1972	1973	1974	1975	1976	1977	1978	1979	1980	1981	1982	1983	1984	1985	1986	1987	1988	1989	1990	1991	1992	1993	1994	1995	1996	1997	1998	1999	2000	2001	2002	2003	2004	2005	2006	2007	2008	2009	2010	2011	2012	2013	2014
[truncated: 6 more columns]
