# Supplementary material for: Clear anti-phase tendency of volcanic eruptions and consistent U.S. Dollar Index response to volcanic forcing
Source: Research Square preprint supplement (doi:10.21203/rs.3.rs-602091/v1), 2021-07-12
Supplement: Supplementary file 8 [file savMXNdata70s.xlsx]

## Sheet: Sheet1
				-0.00060797					-6.26509e-05					0.000463469
				0.0501282					0.0059635					-0.028686
				-1.10271					-0.154546					-0.218809
				22.4734					2.46109					114.644
		Year	Raw	Trend	Detrend	MA3	z-score	Raw	Trend	Detrend	MA3	z-score	Raw	Trend	Detrend	MA3	z-score
		1967	25	21.4202	3.57983			2	2.31245	-0.312448			119.955	114.397	5.5584
		1968	24	20.4636	3.53641	1.17209	0.615712	2	2.17535	-0.175354	-0.512412	-0.747671	122.058	114.095	7.96335	7.39146	0.687911
		1969	16	19.6	-3.59997	0.703588	0.375685	1	2.04944	-1.04944	-0.719702	-1.04723	122.394	113.742	8.65262	8.11396	0.753382
		1970	21	18.8257	2.17433	-1.18756	-0.593205	1	1.93432	-0.934316	-0.604457	-0.880686	121.065	113.339	7.72592	6.98161	0.650772
		1971	16	18.137	-2.13703	-2.16437	-1.09365	2	1.82962	0.17038	-0.166303	-0.247502	117.457	112.89	4.5663	2.9919	0.289237
		1972	11	17.5304	-6.53041	-0.889869	-0.440689	2	1.73497	0.265028	-0.0715291	-0.110542	109.082	112.398	-3.31653	-3.95824	-0.340562
		1973	23	17.0022	5.99784	-1.3604	-0.681757	1	1.65	-0.649995	0.68024	0.975852	98.7408	111.865	-13.1245	-8.93463	-0.791506
		1974	13	16.5486	-3.54863	-0.23899	-0.107225	4	1.57431	2.42569	0.0893795	0.121989	100.932	111.295	-10.3629	-11.802	-1.05134
		1975	13	16.1662	-3.16618	-2.52199	-1.27687	0	1.50755	-1.50755	0.4896	0.700354	98.77	110.689	-11.9187	-8.89065	-0.787521
		1976	15	15.8511	-0.851147	-3.20574	-1.62718	2	1.44933	0.550665	1.21461	1.74808	105.66	110.05	-4.39041	-7.56222	-0.667143
		1977	10	15.5999	-5.5999	-2.28661	-1.15628	6	1.39929	4.60071	1.59812	2.30229	103.005	109.383	-6.37761	-9.28396	-0.823161
		1978	15	15.4088	-0.408775	-2.09427	-1.05774	1	1.35703	-0.357028	1.6405	2.36354	91.6042	108.688	-17.0838	-14.4925	-1.29514
		1979	15	15.2741	-0.274137	0.374918	0.207298	2	1.32219	0.677814	0.342134	0.487249	87.9533	107.969	-20.0161	-18.8504	-1.69004
		1980	17	15.1923	1.80767	0.124604	0.079055	2	1.29438	0.705615	0.37006	0.527606	87.7783	107.23	-19.4513	-14.0379	-1.25395
		1981	14	15.1597	-1.15972	2.8251	1.4626	1	1.27325	-0.273248	-0.275344	-0.405079	103.825	106.471	-2.64636	-3.61642	-0.309587
		1982	23	15.1726	7.82736	3.14673	1.62738	0	1.2584	-1.2584	-0.927037	-1.34685	116.946	105.697	11.2484	9.93213	0.918138
		1983	18	15.2275	2.77255	3.7598	1.94147	0	1.24946	-1.24946	-0.917976	-1.33376	126.105	104.911	21.1943	22.521	2.05891
		1984	16	15.3205	0.67949	1.00129	0.528207	1	1.24606	-0.246064	-0.581118	-0.846958	139.234	104.114	35.1204	31.3265	2.85682
		1985	15	15.4482	-0.448163	2.54152	1.31731	1	1.24783	-0.247826	-0.582754	-0.849322	140.974	103.31	37.6646	27.3275	2.49445
		1986	23	15.6068	7.39324	2.0508	1.0659	0	1.25437	-1.25437	-0.589175	-0.858601	111.698	102.501	9.19752	13.8309	1.27143
		1987	15	15.7927	-0.792665	2.86612	1.48361	1	1.26533	-0.265327	-0.600004	-0.874251	96.3208	101.69	-5.36948	-1.36121	-0.105227
		1988	18	16.0022	1.99778	0.324447	0.18144	1	1.28031	-0.280315	-0.281534	-0.414024	92.9692	100.881	-7.91167	-5.01155	-0.436009
		1989	16	16.2318	-0.231775	-1.23723	-0.618651	1	1.29896	-0.29896	0.0332798	0.0409187	98.3217	100.075	-1.7535	-6.59598	-0.579585
		1990	11	16.4777	-5.47769	-0.481925	-0.231688	2	1.32089	0.679114	0.0114788	0.00941368	89.1533	99.2761	-10.1228	-6.67171	-0.586448
		1991	21	16.7363	4.26369	-1.406	-0.705118	1	1.34572	-0.345718	0.320106	0.455416	90.3475	98.4864	-8.13887	-9.50654	-0.84333
		1992	14	17.004	-3.004	-0.672466	-0.329307	2	1.37308	0.626921	-0.0404631	-0.0656484	87.4508	97.7088	-10.258	-7.09656	-0.624946
		1993	14	17.2771	-3.27709	-2.61101	-1.32248	1	1.40259	-0.402593	0.596814	0.855292	94.0533	96.9462	-2.89284	-6.16347	-0.540392
		1994	16	17.552	-1.55195	-3.55133	-1.80423	3	1.43388	1.56612	0.565648	0.810253	90.8617	96.2012	-5.33958	-6.56947	-0.577183
		1995	12	17.8249	-5.82493	-1.48976	-0.748029	2	1.46658	0.533421	0.53308	0.763188	84.0008	95.4768	-11.476	-8.12874	-0.718478
		1996	21	18.0924	2.90762	-2.08932	-1.0552	1	1.5003	-0.500298	0.166152	0.232935	87.205	94.7756	-7.57065	-5.5585	-0.485572
		1997	15	18.3507	-3.35065	-0.679711	-0.333019	2	1.53467	0.465333	-0.201425	-0.298257	96.4717	94.1005	2.37113	-0.00126131	0.0180069
		1998	17	18.5961	-1.5961	-0.590606	-0.287368	1	1.56931	-0.56931	-0.569276	-0.829845	98.65	93.4543	5.19574	4.92131	0.464074
		1999	22	18.8251	3.17493	3.84831	1.98682	0	1.60385	-1.60385	-0.937025	-1.36129	100.037	92.8396	7.19707	9.94588	0.919385
		2000	29	19.0339	9.96608	4.30734	2.22199	1	1.63791	-0.637915	-0.970963	-1.41033	109.704	92.2593	17.4448	16.1933	1.4855
		2001	19	19.219	-0.218997	2.79014	1.44469	1	1.67112	-0.671124	-0.670714	-0.976435	115.654	91.7162	23.9379	20.346	1.86181
		2002	18	19.3767	-1.37666	-1.03297	-0.514005	1	1.7031	-0.703104	-1.0359	-1.50417	110.868	91.2131	19.6552	16.0649	1.47387
		2003	18	19.5033	-1.50326	0.174981	0.104864	0	1.73348	-1.73348	-0.732818	-1.06618	95.3542	90.7527	4.60146	7.02546	0.654745
		2004	23	19.5951	3.40486	0.417645	0.229189	2	1.76187	0.238129	-0.427752	-0.625326	87.1575	90.3378	-3.18032	-0.352258	-0.0137993
		2005	19	19.6487	-0.648665	0.0320044	0.0316133	2	1.78791	0.212094	0.213005	0.300642	87.4933	89.9712	-2.47791	-3.13549	-0.266007
		2006	17	19.6602	-2.66018	-2.31163	-1.1691	2	1.81121	0.188792	0.189828	0.267149	85.9075	89.6557	-3.74824	-5.09036	-0.443151
		2007	16	19.626	-3.62604	-1.6096	-0.809431	2	1.8314	0.168599	0.836427	1.20156	80.3492	89.3941	-9.04494	-8.29743	-0.733765
		2008	21	19.5426	1.45741	-1.19161	-0.59528	4	1.84811	2.15189	0.819845	1.1776	77.09	89.1891	-12.0991	-9.8178	-0.871536
		2009	18	19.4062	-1.4062	0.279337	0.158329	2	1.86096	0.139044	1.14046	1.64092	80.7342	89.0435	-8.30936	-9.29398	-0.824069
		2010	20	19.2132	0.786801	-1.85978	-0.937604	3	1.86957	1.13043	0.798639	1.14695	81.4867	88.9602	-7.47349	-9.44626	-0.837868
		2011	14	18.96	-4.95995	-1.93866	-0.978013	3	1.87356	1.12644	1.1281	1.62306	76.3858	88.9418	-12.5559	-9.53074	-0.845524
		2012	17	18.6428	-1.64281	-1.28697	-0.644133	3	1.87257	1.12743	0.462551	0.661266	80.4283	88.9911	-8.56281	-9.59299	-0.851164
		2013	21	18.2581	2.74187	1.7656	0.919786	1	1.86621	-0.866214	0.469033	0.670633	81.4508	89.1111	-7.66023	-7.49939	-0.661449
		2014	22	17.8023	4.19775	2.55603	1.32474	3	1.85412	1.14588	0.147922	0.20659	83.0292	89.3043	-6.27514	-2.25718	-0.186417
		2015	18	17.2715	0.72846	0.754622	0.401832	2	1.8359	0.164096	0.16626	0.233091	96.7375	89.5737	7.16383	2.71726	0.264351
		2016	14	16.6623	-2.66234	0.0317055	0.0314602	1	1.8112	-0.811198	-0.142242	-0.212731	97.185	89.9219	7.26309	6.65409	0.621093
		2017	18	15.971	2.029	1.39092	0.727827	2	1.77962	0.220376	-0.777209	-1.13033	95.8872	90.3518	5.53535	5.17692	0.487237
		2018	20	15.1939	4.80611	1.16926	0.614261	0	1.74081	-1.74081	-0.738266	-1.07405	93.5985	90.8662	2.73232	4.66324	0.440689
		2019	11	14.3273	-3.32734	0.0370211	0.0341835	1	1.69437	-0.694367	-0.691702	-1.00677	97.1898	91.4678	5.72206	3.88381	0.370059
		2020	12	13.3677	-1.36771			2	1.63993	0.360067			95.3564	92.1594	3.19704

## Sheet: Sheet2
		1967	284120	263280	267020	282020	300130	261170	300240	261160	290360	263300	273070	263090	264040	300260	284130	284010	282110	263180	290061	261140	284140	300240	263280	290380	263250
		1968	282050	261140	264180	284133	261160	267030	267040	284110	284130	284010	282020	266030	300260	300240	264140	265060	273030	290070	284130	261170	273070	264010	284010	261160
		1969	284120	266100	273070	272020	300260	263090	261170	262000	263180	274020	284142	264100	290380	264110	284010	284120
		1970	267020	273070	283230	300240	261140	261120	264180	264270	290070	284210	284010	272020	300260	300130	282110	290120	266030	284070	284010	300240	264010
		1971	300260	263210	263340	282090	290380	300260	264110	261170	266030	266100	284010	284070	300250	264010	264180	263250
		1972	264150	263250	284130	282050	290390	262000	290160	300040	263310	264010	267020
		1973	284130	264250	282050	264150	300240	284133	266100	263180	290360	290120	261140	290030	290390	290070	263340	264220	284096	264010	283110	261230	282110	290070	266030
		1974	284130	283090	284080	290030	263340	282050	263180	300260	264010	283220	284010	261230	284120
		1975	284134	266100	282110	284090	284131	284080	284096	284091	300240	284210	262000	263340	261140
		1976	284131	290240	267020	273070	284080	284133	284130	263340	282050	264010	300250	264250	283120	284131	284120
		1977	283180	266110	284080	284133	273070	285030	300260	263340	282110	300250
		1978	285040	284120	284096	300250	284133	273010	290030	262000	272020	285040	273030	267020	284131	263340	274020
		1979	273010	284141	283040	300250	262000	284070	284132	261030	282110	267020	284133	290260	263200	282090	300250
		1980	284070	264150	282050	282110	268060	300270	300250	272020	284096	300070	263310	290270	300250	261140	267020	262000	284120
		1981	300260	290390	263200	282110	300250	290030	284170	290390	262000	273010	268040	285040	300260	284133
		1982	261140	284133	284120	290150	264220	283120	300260	283110	266030	284070	263340	267020	284110	283110	284096	284210	263140	290390	300260	261140	284120	290030	284133
		1983	263310	284040	263090	264250	268060	283120	266010	282110	284110	284096	261140	273010	267020	284070	264220	263310	283090	283110
		1984	284100	261140	282030	273030	300070	266100	266030	263310	264150	285070	282110	300270	300260	284100	300250	263140
		1985	284096	263090	272020	282030	284142	263340	300260	264050	285050	300250	300270	266030	300130	272020	264150
		1986	300250	300260	290360	284010	284070	290260	263250	290240	263200	261160	261120	261030	284096	284100	300260	272020	264220	290390	284130	300270	300250	266100	284130
		1987	264071	284010	284070	290380	264220	284130	284170	284110	284130	284210	263340	283090	268040	272020	261140
		1988	285050	300270	284170	268070	263180	272020	282110	265090	266100	284070	273010	284170	262000	268060	284121	282060	282030	285070
		1989	272020	284142	300250	284080	284110	267020	283010	290070	266030	283090	300270	282110	290380	284080	290240	283120
		1990	261170	282100	284010	283110	268060	282030	263280	300250	264180	263340	300270
		1991	282090	284080	264220	263290	263340	284130	261030	267020	268060	266030	266100	283040	264180	264220	300260	273083	260010	264071	272020	290380	300100
		1992	284130	262000	300260	284080	273083	272020	282110	284170	267040	300250	284131	300260	263250	272020
		1993	284120	300250	264250	284080	272020	263350	264220	268060	232050	263340	273083	273030	263200	284170
		1994	260010	273010	261230	300260	284120	264010	284130	284080	263340	300250	264030	282110	262000	263350	284080	268060
		1995	284130	267020	284202	282120	300250	264030	263310	263340	284080	263340	263310	283070
		1996	263200	282030	290390	285070	300260	267020	283170	261170	272020	300250	262000	268060	284170	267010	261120	285020	282100	284080	284131	300125	300130
		1997	300250	284080	284130	283090	300260	290390	283260	282060	264050	283260	300250	263340	262000	284110	300270
		1998	268030	285070	261170	284110	284080	285020	284130	300260	267020	261170	264010	300250	300270	284110	282060	261030	283090
		1999	290100	284120	284130	284110	300270	263340	263350	273030	282030	264250	263180	261140	300270	264180	261170	267020	264010	261030	300250	262000	300260	282030
		2000	261030	282030	263310	284080	284110	282060	285020	263350	261220	300260	284130	300250	263180	273030	263340	300060	284040	262000	266030	266100	285030	300060	300250	261140	282030	300260	284110	260010	282060
		2001	300250	300130	284080	284121	284130	284110	300100	261160	284120	300250	262000	268030	261170	284141	261140	284096	264090	284040	273030
		2002	300250	266100	284130	272020	300260	263100	264180	273030	267010	284080	284090	263350	263340	282060	300260	284110	266100	290360
		2003	284080	284110	273030	266100	268060	300250	263200	282110	284211	264200	264180	284200	290360	273030	284110	272020	282060	283110
		2004	284040	282030	266030	264030	300260	283110	261140	290260	264160	261170	263310	284120	273030	267040	268030	263340	284200	267020	282060	285050	264160	300250	282110
		2005	266030	266020	300250	284130	273030	263340	284130	290120	260010	266030	282110	284040	261160	290360	284080	264160	290380	272020	300260
		2006	266030	284170	273010	261230	261160	284040	273030	267020	264260	272020	300250	285070	273010	284200	263250	273030	284040
		2007	261160	284200	262000	263280	261170	268060	290360	263340	268040	266030	300250	283040	261160	290360	300260	264260
		2008	300090	267020	285070	300260	282090	273030	283110	290360	300250	263340	266030	263250	260010	268060	284040	264160	268030	261170	267020	282110	284040
		2009	300250	282090	263200	273030	290120	300260	290240	264030	264050	263180	284170	284040	261170	262000	290380	283110	263200	261230
		2010	263310	300230	273010	263250	262000	290240	260010	261080	267020	290380	290270	284120	300070	284193	300250	284170	284040	282090	284130	263300
		2011	261170	268060	300260	261140	262000	266030	266100	282110	263300	284170	300260	267020	266100	282090
		2012	300240	290150	284170	263340	264150	290390	261140	268060	266100	300260	266030	290070	267020	264270	261140	284120	264230
		2013	284096	263250	300120	260010	263090	261080	264250	300260	290200	284090	263340	290260	263300	282060	261170	273030	263090	260010	290070	284305	268040
		2014	268060	290290	263340	290260	264180	283040	282110	273030	282050	267020	300120	264050	284141	263300	262000	263250	263180	263280	267020	261140	282110	263340
		2015	272020	261140	263310	264030	290390	266100	300260	268060	264270	283020	263170	283110	282050	266100	273010	290360	266030	300260
		2016	290260	300120	261170	290380	282110	300130	268060	264030	290360	273010	261170	290360	273010	266030
		2017	272020	264020	261230	290240	282090	261170	264050	273010	261140	300130	267020	263200	284096	282080	300010	264100	262000	260010
		2018	267020	282050	268060	266030	260010	290200	290240	290390	284096	262000	263250	300130	261140	261170	263200	282090	267020	283120	273030	251002
		2019	284096	282060	283110	263090	290250	290240	282110	300260	263310	300130	261080
		2020	263250	263310	264230	282060	282050	261080	263340	282060	300130	266030	273070	282050

## Sheet: Sheet3
		1967	345060	345040
		1968	345033	345040
		1969	345040
		1970	345040
		1971	383010	360150
		1972	360160	345040
		1973	351080
		1974	345040	360160	351080	345060
		1975
		1976	360060	345040
		1977	345040	360160	345040	351060	345060	360160
		1978	345040
		1979	345040	360150
		1980	345040	345040
		1981	345040
		1982
		1983
		1984	351020
		1985	351020
		1986
		1987	345040
		1988	360160
		1989	351080
		1990	360160	351080
		1991	345040
		1992	345040	345040
		1993	351080
		1994	345060	351020	345040
		1995	360050	384010
		1996	345040
		1997	360101	382070
		1998	382050
		1999
		2000	351080
		2001	360160
		2002	351080
		2003
		2004	351080	360050
		2005	351080	360050
		2006	345040	345040
		2007	351080	351050
		2008	351050	351080	345040	351050
		2009	345040	345040
		2010	351080	345070	345070
		2011	383020	351080	345070
		2012	351080	351020	345070
		2013	345070
		2014	384010	351020	345070
		2015	360160	345070
		2016	345040
		2017	345040	360160
		2018
		2019	345040
		2020	360150	345070

## Sheet: Sheet4
																																			282060
																																			260010
																																			284110
																																			300260
		263250																																	282030
		290380	261160																																261140
		263280	284010					266030									284133				284130														300250				282110
		300240	264010					290070									290030				266100													282030	300060				300250										263340
		284140	273070		264010			282110									284120				300250					300100					300130			300260	285030				264160				284040					268040	282110
		261140	261170		300240			261230									261140				300270					290380					300125			262000	266100				285050				282110		263300			284305	261140
		290061	284130		284010			283110									300260				284130					272020					284131			300250	266030	273030			282060	300260			267020		284130			290070	267020
		263180	290070		284070			264010									290390	283110			290390		285070			264071					284080			261030	262000	284040	290360	283110	267020	272020			261170	261230	282090			260010	263280
		282110	273030		266030			284096							284120		263140	283090			264220		282030			260010					282100		283090	264010	284040	264090	266100	282060	284200	290380	284040		268030	263200	284040		264230	263090	263180
		284010	265060	284120	290120	263250		264220							262000		284210	263310	263140		272020		282060	283120		273083			268060		285020		261030	267020	300060	284096	284110	272020	263340	264160	273030	264260	264160	283110	284170		284120	273030	263250
		284130	264140	284010	282110	264180		263340			284120		274020	300250	267020		284096	264220	300250	264150	300260	261140	284121	290240		300260			284080		261120	300270	282060	261170	263340	261140	300260	284110	268030	284080	263250	300260	284040	290380	300250		261140	261170	262000
		300260	300240	264110	300130	264010		290070			284131		263340	282090	261140	284133	283110	284070	284100	272020	284100	272020	268060	284080		264220	272020	284170	263350		267010	284110	284110	264180	273030	284141	282060	273030	267040	290360	284200	290360	268060	262000	284193	282090	264270	282060	263300
		264040	300260	290380	300260	300250		290390	284120	261140	283120		284131	263200	300250	300260	284110	267020	300260	300130	284096	268040	262000	290380		264180	263250	263200	262000		284170	262000	300270	300270	263180	261170	263340	290360	273030	261160	273010	261160	260010	261170	300070	266100	267020	263300	284141
		263090	266030	264100	272020	284070		290030	261230	263340	264250		267020	290260	290270	285040	267020	273010	300270	266030	261030	283090	284170	282110		283040	300260	273030	282110	283070	268060	263340	300250	261140	300250	268030	263350	284200	284120	284040	285070	283040	263250	284040	284120	267020	290070	290260	264050
		273070	282020	284142	284010	284010	267020	261140	284010	262000	300250		273030	284133	263310	268040	263340	261140	282110	300270	261120	263340	273010	300270	300270	266100	284131	273083	264030	263310	262000	300250	264010	263180	284130	262000	284090	264180	263310	282110	300250	300250	266030	284170	290270	300260	266030	263340	300120
		263300	284010	274020	284210	266100	264010	290120	283220	284210	264010	300250	285040	267020	300070	273010	284070	284096	285070	300250	261160	284210	284070	283090	263340	266030	300250	263340	300250	263340	300250	283260	261170	264250	300260	300250	284080	264200	261170	266030	272020	266030	263340	263180	290380	284170	300260	284090	267020
		290360	284130	263180	290070	266030	263310	290360	264010	300240	282050	282110	272020	282110	284096	262000	266030	284110	264150	285050	263200	284130	266100	266030	264180	268060	267040	232050	263340	284080	272020	264050	267020	282030	261220	284120	267010	284211	264160	260010	264260	268040	300250	264050	267020	263300	266100	290200	282050
		261160	284110	262000	264270	261170	300040	263180	300260	284091	263340	263340	262000	261030	272020	290390	283110	282110	263310	264050	290240	284110	265090	290070	300250	267020	284170	268060	284080	263340	261170	282060	300260	273030	263350	261160	273030	282110	290260	290120	267020	263340	290360	264030	261080	282110	268060	300260	273030
		300240	267040	261170	264180	264110	290160	266100	263180	284096	284130	300260	290030	284132	300250	284170	300260	266010	266030	300260	263250	284170	282110	283010	263280	261030	282110	264220	284130	263310	283170	283260	284130	263350	285020	300100	264180	263200	261140	284130	273030	290360	283110	290240	260010	266100	261140	264250	282110
		261170	267030	263090	261120	300260	262000	284133	282050	284080	284133	285030	273010	284070	300270	290030	283120	283120	266100	263340	290260	284130	272020	267020	282030	284130	272020	263350	264010	264030	267020	290390	285020	263340	282060	284110	263100	300250	283110	263340	284040	268060	273030	300260	290240	266030	290390	261080	283040
		300130	261160	300260	261140	290380	290390	300240	263340	284131	284080	273070	284133	262000	268060	300250	264220	268060	300070	284142	284070	264220	263180	284110	268060	263340	273083	272020	284120	300250	300260	300260	284080	300270	284110	284130	300260	268060	300260	273030	261160	261170	282090	290120	262000	262000	264150	263090	264180
		282020	284133	272020	300240	282090	282050	264150	290030	284090	273070	284133	300250	300250	282110	282110	290150	264250	273030	282030	284010	290380	268070	284080	283110	263290	284080	284080	300260	282120	285070	283090	284110	284110	284080	284121	272020	266100	264030	284130	261230	263280	300260	273030	263250	261140	263340	260010	290260
		267020	264180	273070	283230	263340	284130	282050	284080	282110	267020	284080	284096	283040	282050	263200	284120	263090	282030	272020	290360	284070	284170	300250	284010	264220	300260	264250	261230	284202	290390	284130	261170	284130	263310	284080	284130	273030	266030	300250	273010	262000	285070	263200	273010	300260	284170	300120	263340
		263280	261140	266100	273070	263210	263250	264250	283090	266100	290240	266110	284120	284141	264150	290390	284133	284040	261140	263090	300260	284010	300270	284142	282100	284080	262000	300250	273010	267020	282030	284080	285070	284120	282030	300130	266100	284110	282030	266020	284170	284200	267020	282090	300230	268060	290150	263250	290290
		284120	282050	284120	267020	300260	264150	284130	284130	284134	284131	283180	285040	273010	284070	300260	261140	263310	284100	284096	300250	264071	285050	272020	261170	282090	284130	284120	260010	284130	263200	300250	268030	290100	261030	300250	300250	284080	284040	266030	266030	261160	300090	300250	263310	261170	300240	284096	268060
		1967	1968	1969	1970	1971	1972	1973	1974	1975	1976	1977	1978	1979	1980	1981	1982	1983	1984	1985	1986	1987	1988	1989	1990	1991	1992	1993	1994	1995	1996	1997	1998	1999	2000	2001	2002	2003	2004	2005	2006	2007	2008	2009	2010	2011	2012	2013	2014
[truncated: 6 more columns]

## Sheet: Sheet5
												360160
												345060
									345060			351060																															351050
									351080			345040																	345040														345040		345070	345070	345070		345070
		345040	345040			360150	345040		360160		345040	360160		360150	345040										351080		345040		351020	384010		382070							360050	360050	345040	351050	351080	345040	345070	351080	351020		351020
		345060	345033	345040	345040	383010	360160	351080	345040		360060	345040	345040	345040	345040	345040			351020	351020		345040	360160	351080	360160	345040	345040	351080	345060	360050	345040	360101	382050		351080	360160	351080		351080	351080	345040	351080	351050	345040	351080	383020	351080	345070	384010
		1967	1968	1969	1970	1971	1972	1973	1974	1975	1976	1977	1978	1979	1980	1981	1982	1983	1984	1985	1986	1987	1988	1989	1990	1991	1992	1993	1994	1995	1996	1997	1998	1999	2000	2001	2002	2003	2004	2005	2006	2007	2008	2009	2010	2011	2012	2013	2014
[truncated: 6 more columns]

## Sheet: Sheet6
	Global Volcanism Program - Volcanoes of the World 4.9.4		Downloaded on 13 May 2021 at 06:57 PM
	Volcano Number	Volcano Name	Area of Activity	Start Year	End Year	Latitude	Longitude
	210010	West Eifel Volcanic Field	Strohn, Pulvermaar	-8300		50.17	6.85
	210020	Chaine des Puys	Montcineyre, Estivadoux, Pavin	-4040		45.775	2.97
	210040	Calatrava Volcanic Field	Columba	-3600		38.87	-4.02
	211003	Vulsini		-104		42.6	11.93
	211004	Colli Albani		-114		41.73	12.7
	211010	Campi Flegrei	Monte Nuovo	1538	1538	40.827	14.139
	211020	Vesuvius	Summit and upper flanks	1913	1944	40.821	14.426
	211030	Ischia	Arso	1302	1302	40.73	13.897
	211031	Palinuro		-8040		39.48	14.83
	211040	Stromboli	Summit craters and Sciara del Fuoco	1934	2021	38.789	15.213
	211042	Lipari	Pelato (Forgia Vecchia, Rocche Rossi)	1230		38.49	14.933
	211050	Vulcano		1968		38.404	14.962
	211060	Etna	New Southeast Crater (NSEC)	2013	2021	37.748	14.999
	211070	Campi Flegrei del Mar di Sicilia	Pinne	1911		37.1	12.7
	211071	Pantelleria	South of Pantelleria	1891		36.77	12.02
	211080	Marsili		-1050		39.284	14.399
	212020	Methana		1922		37.615	23.336
	212030	Milos	SE Mílos, east of Fyriplaka tuff ring	140		36.699	24.439
	212040	Santorini	Nea Kameni (Liatsikas dome)	1950	1950	36.404	25.396
	212050	Nisyros	Polyvotis Micros	1888		36.586	27.16
	213002	Hasan Dagi		-6750		38.13	34.17
	213004	Acigol-Nevsehir		-2080		38.537	34.621
	213010	Erciyes Dagi		253		38.531	35.447
	213020	Nemrut Dagi		1692		38.654	42.229
	213030	Tenduruk Dagi		1855		39.356	43.874
	213040	Ararat	Upper northern flank	1840		39.7	44.3
	214010	Elbrus		50		43.351	42.442
	214020	Kazbek		-750		42.7	44.5
	214070	Ghegham Volcanic Ridge	North part of eastern cone cluster	-1900		40.283	45
	214080	Vaiyots-Sar		753		39.797	45.497
	214090	Porak		-740		40.028	45.74
	214100	Tskhouk-Karckar		-3000		39.742	45.992
	221010	Tair, Jebel at		2007	2008	15.55	41.83
	221020	Zubair Group	Jadid Island	2013	2013	15.05	42.18
	221041	Dallol	Dallol crater	2011	2011	14.242	40.3
	221060	Alu-Dalafilla	W and NW of Dalaffilla	2008	2008	13.793	40.553
	221080	Erta Ale		1967	2020	13.6	40.67
	221100	Dubbi		1900		13.579	41.809
	221101	Nabro		2011	2012	13.37	41.7
	221112	Alayta		1915		12.888	40.573
	221113	Dabbahu	NE flank (Da'Ure)	2005	2005	12.595	40.48
	221115	Manda Hararo		2009	2009	12.17	40.82
	221122	Manda-Inakir	Kammourta	1928		12.38	42.2
	221126	Ardoukoba		1978	1978	11.58	42.47
	221141	Dama Ali	Volcano Uncertain	1631		11.28	41.63
	221160	Ayelu		1928		10.082	40.702
	221170	Adwa		1928		10.063	40.831
	221190	Fentale	Caldera floor and SW flank	1820		8.975	39.93
	221200	Kone	East margin of Gariboldi caldera	1820		8.788	39.701
	221250	Tullu Moye	Wonji fault belt, SE of Lake Koka	1900		8.159	39.137
	221270	Aluto		-50		7.77	38.78
	221290	Corbetti Caldera		1957	1964	7.193	38.39
	222010	Central Island	East side of Central Island	1974	1974	3.496	36.04
	222020	South Island		1888		2.63	36.6
	222030	Barrier, The	North flank (Teleki)	1921		2.32	36.57
	222040	Namarunu	Lower eastern flanks	-6550		1.98	36.43
	222051	Emuruangogolak	South caldera rim	1910		1.5	36.33
	222052	Silali	Upper east flank	-5050		1.15	36.23
	222053	Paka		-7550		0.92	36.18
	222060	Menengai		-6050		-0.2	36.07
	222090	Olkaria	Ololbutot	1770		-0.904	36.292
	222100	Longonot	Northern flank	1863		-0.914	36.446
	222120	Lengai, Ol Doinyo	North Crater	2017	2021	-2.764	35.914
	222130	Chyulu Hills	Shaitani and Chaimu	1855		-2.68	37.88
	222160	Meru	Ash Cone	1910	1910	-3.25	36.75
	222161	Igwisi Hills	NE Volcano	-10450		-4.889	31.933
	222164	Ngozi		1450		-8.989	33.554
	222166	Rungwe		1250		-9.135	33.668
	222170	Kyejo	Sarabwe and Fiteko	1800		-9.229	33.792
	223001	Fort Portal		-2120		0.7	30.25
	223020	Nyamulagira	Summit caldera	2018	2021	-1.408	29.2
	223030	Nyiragongo		2002	2021	-1.52	29.25
	223040	Karisimbi		-8050		-1.506	29.45
	223050	Visoke	11 km north of summit (Mugogo)	1957	1957	-1.458	29.485
	224004	Santa Isabel	SE flank	1923		3.588	8.762
	224010	Cameroon	Upper SW flank (4000, 3470-3220, 2750 m)	2000	2000	4.203	9.17
	224030	Oku Volcanic Field	Lake Nyos	1986	1986	6.25	10.5
	225030	Marra, Jebel	Deriba caldera	-2000		12.95	24.27
	225050	Meidob Volcanic Field	Vent VF 214	-2950		15.32	26.47
	225060	Bayuda Volcanic Field		850		18.33	32.75
	231001	Harrat Ash Shamah	Jabal Druse	1850		32.333	37.583
	231020	Uwayrid, Harrat	Hala-'l-Bedr, Hala-'l-'Ishqua or both	640		27.08	37.25
	231040	Lunayyir, Harrat		1000		25.17	37.75
	231060	Khaybar, Harrat	Harrat Lali	650		25.5	40
	231070	Rahat, Harrat	Near Madinah	1292		23.08	39.78
	231080	Yar, Jabal		1810		17.05	42.83
	231090	Arhab, Harra of	South flank of Kaulet Hattab	500		15.63	44.08
	231110	Haylan, Jabal	West of Sirwan	-1200		15.4	45.1
	231120	Dhamar, Harras of	Near the town of Dhamar	1937		14.57	44.67
	231160	Sawad, Harra Es-		1253		13.58	46.12
	231180	Bir Borhut		950		15.515	50.935
	232010	Damavand		-5350		35.951	52.109
	232050	Taftan		1993		28.6	61.13
	233005	Mayotte	About 50 km E of the eastern tip of Mayotte Island	2018	2019	-12.83	45.17
	233010	Karthala	Chahalé crater	2007	2007	-11.75	43.38
	233014	Itasy Volcanic Field		-6050		-19.033	46.7
	233020	Fournaise, Piton de la		2020	2020	-21.244	55.708
	234000	Boomerang Seamount		1995		-37.721	77.825
	234002	St. Paul	SW flank (near Cape West)	1793		-38.72	77.53
	234010	Heard	Mawson Peak	2012	2021	-53.106	73.513
	234011	McDonald Islands		2005		-53.03	72.6
	234070	Marion Island	South side of island	2004	2004	-46.9	37.75
	241010	Kaikohe-Bay of Islands	Te Puke	400		-35.3	173.9
	241020	Auckland Volcanic Field	Rangitoto	1350		-36.9	174.87
	241021	Mayor Island	South end of caldera, Taratimi Bay	-5060		-37.28	176.25
	241030	Taranaki		1854		-39.3	174.07
	241040	Whakaari/White Island	1978/90 Crater Complex	2019	2019	-37.52	177.18
	241050	Okataina	Waimangu (Raupo Pond crater)	1981	1981	-38.12	176.5
	241060	Reporoa	Waiotapu thermal area	1180		-38.42	176.33
	241061	Maroa	Orakeikorako	180		-38.42	176.08
	241070	Taupo	East Lake Taupo (Horomatangi Reefs)	260		-38.82	176
	241080	Tongariro	Upper Te Maari Craters	2012	2012	-39.157	175.632
	241100	Ruapehu		2007	2007	-39.28	175.57
	241120	Rumble IV		1966	1966	-36.13	178.05
	241130	Rumble III		2008		-35.745	178.478
	241140	Healy	Healy caldera	1360		-35.004	178.973
	242005	Havre Seamount		2012	2012	-31.08	-179.033
	242010	Curtis Island	5-6 km NNE of Curtis Island	2009	2009	-30.543	-178.556
	242021	Macauley	22 km NNE of Macauley Island	1887		-30.21	-178.475
	242030	Raoul Island	Green Lake crater	2006	2006	-29.27	-177.92
	242050	Monowai		2012	2012	-25.887	-177.188
	243010	Unnamed		1932		-21.338	-175.65
	243030	Unnamed		2017	2017	-20.852	-175.55
	243040	Hunga Tonga-Hunga Ha'apai		2014	2015	-20.536	-175.382
	243050	Fonuafo'ou		1936		-20.32	-175.42
	243060	Tofua		2015	2021	-19.75	-175.07
	243061	Kao		1847		-19.668	-175.016
	243070	Lateiki		2019	2019	-19.18	-174.87
	243080	Home Reef		2006	2006	-18.992	-174.775
	243090	Late	NE flank	1854		-18.806	-174.65
	243091	Unnamed		2001	2001	-18.325	-174.365
	243100	Fonualei		1974		-18.023	-174.317
	243102	Curacoa	13 km north of Tafahi	1979		-15.62	-173.67
	243110	Niuafo'ou	NE part of caldera lake (Vai Lahi)	1985	1985	-15.6	-175.63
	243120	Tafu-Maka	Maka	2008	2008	-15.37	-174.23
	243130	West Mata	Prometheus and Hades vents	2008	2009	-15.1	-173.75
	244000	Vailulu'u	West side of caldera (Nafanua)	2003		-14.215	-169.058
	244010	Ofu-Olosega	Submarine vent 3 km SE of Olosega	1866	1866	-14.175	-169.618
	244020	Tutuila	Cones E of Pava'ia'i Village	440		-14.295	-170.7
	244040	Savai'i	Matavanu (north flank 402 m)	1905	1911	-13.612	-172.525
	245010	Taveuni	Near South Cape	1550		-16.82	-179.97
	245030	Nabukelevu	Dome NW of summit	1660		-19.12	177.98
	250010	St. Andrew Strait	Tuluman	1953	1957	-2.38	147.35
	250020	Baluan		1931		-2.57	147.28
	250030	Central Bismarck Sea		1972	1972	-3.03	147.78
	251001	Blup Blup		1830		-3.507	144.605
	251002	Kadovar		2018	2021	-3.608	144.588
	251010	Bam		1960	1960	-3.613	144.818
	251020	Manam		2014	2021	-4.08	145.037
	251030	Karkar		2014	2014	-4.649	145.964
	251050	Long Island	E-W fissure NNE of Motmot Island	1993	1993	-5.358	147.12
	251070	Ritter Island		2007	2007	-5.519	148.115
	252010	Langila		2015	2021	-5.525	148.42
	252040	Dakataua	Makalia	1895		-5.094	150.094
	252070	Krummel-Garbuna-Welcker		2008	2008	-5.416	150.027
	252080	Witori	Pago	2012	2012	-5.576	150.516
	252100	Hargy	Galloseulo	950		-5.33	151.1
	252110	Bamus		1886		-5.2	151.23
	252120	Ulawun		2019	2019	-5.05	151.33
	252130	Lolobau	East flank (Sili)	1911	1912	-4.92	151.158
	252140	Rabaul	Tavurvur	2014	2014	-4.271	152.203
	252150	Tavui		-4946		-4.12	152.2
	253010	Lamington		1951	1956	-8.95	148.15
	253030	Victory		1890	1935	-9.2	149.07
	253040	Waiowa		1943	1944	-9.57	149.075
	253060	Dawson Strait Group	Oiau	1350		-9.62	150.88
	254020	Ambitle	East side of caldera	-350		-4.08	153.65
	255010	Balbi	Crater B ?	1825		-5.92	154.98
	255011	Billy Mitchell		1580		-6.092	155.225
	255020	Bagana		2000	2021	-6.137	155.196
	255030	Loloru		-1050		-6.52	155.62
	255050	Simbo	Ngusuna crater?	1910		-8.292	156.52
	255060	Kavachi		2020	2021	-8.991	157.979
	255070	Savo		1865		-9.13	159.82
	256010	Tinakula		2018	2021	-10.386	165.804
	257010	Suretamatai	NW flank	1965	1966	-13.8	167.47
	257020	Gaua	Mt. Garat	2011	2011	-14.27	167.5
	257021	Mere Lava		1606		-14.45	168.05
	257030	Ambae		2017	2018	-15.389	167.835
	257040	Ambrym	Benbow and Marum	2008	2018	-16.25	168.12
	257050	Lopevi		2014	2014	-16.507	168.346
	257060	Epi	Epi B	2004	2004	-16.68	168.37
	257070	Kuwae	Karua	1980		-16.829	168.536
	257090	Traitor's Head	Four submarine vents N of Erromango	1959		-18.754	169.238
	257100	Yasur		1774	2021	-19.532	169.447
	258001	Eastern Gemini Seamount		1996	1996	-20.98	170.28
	258010	Matthew Island		1976		-22.33	171.32
	258020	Hunter Island		1983		-22.4	172.05
	259010	Newer Volcanics Province	Mt. Gambier	-2900		-37.77	142.5
	260010	Barren Island		2018	2021	12.278	93.858
	261020	Seulawah Agam	NNE flank (van Heutsz crater)	1839	1839	5.448	95.658
	261030	Peuet Sague		2000	2000	4.903	96.289
	261050	Telong, Bur ni		1937		4.769	96.821
	261070	Singkut		1881		3.248	98.501
	261080	Sinabung		2020	2021	3.17	98.392
	261120	Sorikmarapi		1996		0.686	99.539
	261130	Talakmau		1937		0.079	99.98
	261140	Marapi	Verbeek Crater	2018	2018	-0.38	100.474
	261150	Tandikat-Singgalang	Tandikat	1924	1924	-0.39	100.331
	261160	Talang		2007	2007	-0.979	100.681
	261170	Kerinci		2018	2020	-1.697	101.264
	261180	Sumbing		1921	1921	-2.414	101.728
	261220	Kaba		2000	2000	-3.522	102.615
	261230	Dempo		2017	2017	-4.016	103.121
	261251	Ranau		1903	1903	-4.871	103.925
	261270	Suoh	Pematang Bata	1933	1933	-5.25	104.27
	262000	Krakatau		2018	2020	-6.102	105.423
	263040	Perbakti-Gagak	Kawah Parabakti	1939		-6.75	106.7
	263050	Salak	Kawah Cikaluwung Putri	1938		-6.72	106.73
	263060	Gede-Pangrango		1957	1957	-6.77	106.965
	263090	Tangkuban Parahu		2019	2019	-6.77	107.6
	263100	Papandayan	Kawah Baru, Kawah Nangklak	2002	2002	-7.32	107.73
	263130	Guntur		1887		-7.143	107.84
	263140	Galunggung		1984	1984	-7.25	108.058
	263170	Cereme		2015	2015	-6.895	108.408
	263180	Slamet		2014	2014	-7.242	109.208
	263200	Dieng Volcanic Complex	Sileri Crater	2018	2018	-7.2	109.879
	263210	Sundoro		1971	1971	-7.3	109.992
	263220	Sumbing		1730		-7.384	110.07
	263240	Merbabu		1797		-7.454	110.44
	263250	Merapi		2020	2021	-7.54	110.446
	263251	Muria	East flank (Gunung Bambang)	-160		-6.62	110.88
	263260	Lawu		1885	1885	-7.625	111.192
	263270	Wilis		1641		-7.808	111.758
	263280	Kelut		2014	2014	-7.93	112.308
	263290	Arjuno-Welirang	Gunung Welirang	1991		-7.733	112.575
	263291	Penanggungan		200		-7.616	112.62
	263300	Semeru	Jonggring Seloko	2014	2021	-8.108	112.922
	263310	Tengger Caldera		2020	2020	-7.942	112.95
	263320	Lamongan		1953	1953	-7.981	113.341
	263330	Iyang-Argapura		1597		-7.97	113.57
	263340	Raung		2021	2021	-8.119	114.056
	263350	Ijen	Kawah Ijen	2002	2002	-8.058	114.242
	264010	Batur		1999	2000	-8.242	115.375
	264020	Agung	Summit crater	2017	2019	-8.343	115.508
	264030	Rinjani	Barujari Crater	2016	2016	-8.42	116.47
	264040	Tambora	NE part of caldera floor	1967		-8.25	118
	264050	Sangeang Api	Summit crater	2017	2020	-8.2	119.07
	264071	Ranakah	Anak Ranakah	1991		-8.62	120.52
	264080	Inierie	NE side (Wolo Bobo)	-8050		-8.875	120.95
	264090	Inielika	Summit crater complex	2001	2001	-8.73	120.98
	264100	Ebulobo		2017	2017	-8.817	121.191
	264110	Iya		1971	1971	-8.891	121.641
	264140	Kelimutu	Tiwu Nua Muri	1968	1968	-8.77	121.82
	264150	Paluweh	Rokatenda	2012	2013	-8.32	121.708
	264160	Egon		2008	2008	-8.676	122.455
	264180	Lewotobi		2014	2014	-8.542	122.775
	264200	Leroboleng		2003	2003	-8.365	122.833
	264220	Iliboleng		1993	1993	-8.342	123.258
	264230	Lewotolok		2020	2021	-8.274	123.508
	264250	Iliwerung	Hobal (submarine vent on SE flank)	2013	2013	-8.53	123.57
	264260	Tara, Batu		2007	2015	-7.791	123.585
	264270	Sirung		2015	2015	-8.508	124.13
	265030	Gunungapi Wetar		1699		-6.642	126.65
	265040	Wurlali		1892	1892	-7.125	128.675
	265050	Teon		1904		-6.976	129.144
	265060	Nila	East flank	1968	1968	-6.73	129.5
	265070	Serua	Summit and south flank	1921		-6.312	130.017
	265090	Banda Api	Summit, north and south flanks	1988	1988	-4.523	129.881
	266010	Colo	Gunung Colo	1983	1983	-0.162	121.601
	266020	Ambang		2005		0.75	124.42
	266030	Soputan		2020	2020	1.112	124.737
	266040	Riendengan-Sempu		1819		1.13	124.758
	266100	Lokon-Empung	Tompaluan	2015	2015	1.358	124.792
	266110	Mahawu		1977		1.352	124.865
	266130	Tangkoko-Duasudara	Batu Angus	1880		1.518	125.185
	267010	Ruang		2002	2002	2.3	125.37
	267020	Karangetang		2018	2021	2.781	125.407
	267030	Banua Wuhu		1968	1968	3.138	125.491
	267040	Awu		2004	2004	3.689	125.447
	268010	Dukono	Malupang Magiwe and Malupang Warirang	1933	2021	1.693	127.894
	268030	Ibu		2008	2021	1.488	127.63
	268040	Gamkonora		2013	2013	1.38	127.53
	268060	Gamalama		2018	2018	0.8	127.33
	268063	Moti		1774		0.454	127.411
	268070	Makian		1988	1988	0.32	127.4
	271011	Parker		1640	1641	6.113	124.892
	271020	Matutum		1911		6.37	125.07
	271031	Leonard Range		120		7.382	126.047
	271040	Makaturing		1882		7.644	124.317
	271060	Ragang		1916		7.691	124.507
	271070	Musuan		1886		7.877	125.068
	271080	Camiguin	Upper NE flank of Hibok-Hibok	1948	1953	9.203	124.673
	272020	Kanlaon		2017	2017	10.412	123.132
	272050	Cabalían		1820		10.285	125.218
	272070	Mahagnao		1895		10.882	124.888
	272080	Biliran		1939		11.523	124.535
	273010	Bulusan		2017	2017	12.769	124.056
	273030	Mayon		2018	2019	13.257	123.685
	273041	Iriga		1628		13.458	123.451
	273042	Isarog		-3500		13.658	123.38
	273050	Banahaw	Banáhao	1909		14.07	121.48
	273060	San Pablo Volcanic Field	Sampaloc Lake	1350		14.12	121.3
	273070	Taal		2020	2020	14.002	120.993
	273081	Mariveles		-2050		14.527	120.482
	273083	Pinatubo	Caldera floor	1993	1993	15.13	120.35
	273088	Ambalatungan Group	Mt. Binuluan	1952		17.32	121.1
	273090	Cagua		1860		18.222	122.123
	274010	Camiguin de Babuyanes	SW flank	1857		18.83	121.86
	274020	Didicas	NNE side	1978	1978	19.077	122.202
	274030	Babuyan Claro	Smith volcano	1924		19.523	121.94
	274050	Unnamed		1854		20.33	121.75
	274060	Iraya		1454		20.469	122.01
	275001	Hainan Volcanic Field	Nansheling ridge	1933	1933	19.905	110.229
	275060	Cendres, Ile des		1923	1923	10.158	109.014
	275070	Veteran		1928		9.83	109.05
	275080	Popa		-442		20.92	95.25
	275110	Tengchong	Dayingshan or Heikongshan	1609		25.23	98.5
	281031	Kueishantao		1853	1853	24.841	121.953
	281032	Tatun Volcanic Group	Shamao	648		25.178	121.553
	282010	Submarine Volcano NNE of Iriomotejima		1924		24.57	123.93
	282020	Io-Torishima		1968	1968	27.881	128.223
	282021	Yokoatejima		1835		28.797	128.997
	282030	Suwanosejima	O-take	2004	2021	29.638	129.714
	282040	Nakanoshima	On-take	1949		29.859	129.857
	282043	Kuchinoshima		1190		29.968	129.926
	282050	Kuchinoerabujima		2020	2020	30.443	130.217
	282060	Kikai		2020	2020	30.793	130.305
	282070	Ata	Kaimon	1615		31.22	130.57
	282080	Aira	Minamidake summit crater	2017	2021	31.593	130.657
	282081	Yonemaru-Sumiyoshiike	Yonemaru	-6200		31.771	130.592
	282090	Kirishimayama	Shinmoedake	2018	2018	31.934	130.862
	282091	Fukue	Hino-take	-400		32.657	128.849
	282100	Unzendake	Fugen-dake	1996	1996	32.761	130.299
	282110	Asosan		2019	2020	32.884	131.104
	282120	Kujusan	Hosho lava dome (east flank)	1995	1996	33.086	131.249
	282130	Yufu-Tsurumi		867	867	33.282	131.39
	283001	Abu	Kasa-yama	-6850		34.5	131.6
	283002	Sanbesan		650		35.141	132.622
	283010	Izu-Tobu	Teishi-kaikyu (4 km NE of Ito City)	1989	1989	34.9	139.098
	283020	Hakoneyama		2015	2015	35.233	139.021
	283030	Fujisan		1854	1855	35.361	138.728
	283031	Yokodake	Yoko-dake	1200		36.087	138.32
	283040	Ontakesan	Summit crater	2014	2014	35.893	137.48
	283050	Hakusan	Midoriga-ike	1659	1659	36.155	136.771
	283060	Norikuradake		-50		36.106	137.554
	283070	Yakedake	SE flank (Azusa-gawa)	1995	1995	36.227	137.587
	283080	Midagahara		1858		36.571	137.59
	283090	Niigata-Yakeyama	Upper east flank	1998		36.921	138.036
	283100	Myokosan		-750		36.891	138.114
	283110	Asamayama		2019	2019	36.406	138.523
	283120	Kusatsu-Shiranesan	Motoshiranesan	2018	2018	36.618	138.528
	283122	Harunasan	Futatsu-dake	550		36.477	138.851
	283130	Akagisan		1938		36.56	139.193
	283131	Hiuchigatake	Miike-dake lava dome	1544		36.955	139.285
	283140	Nikko-Shiranesan	Shirane-san	1952	1952	36.799	139.376
	283141	Nantaisan		-9540		36.765	139.491
	283142	Omanago Group	Mitsu-dake	-3050		36.795	139.507
	283143	Takaharayama	Fuji-san lava dome	-4570		36.9	139.777
	283150	Nasudake	Chausu-dake (west side)	1963	1963	37.125	139.963
	283151	Numazawa		-3400		37.444	139.566
	283160	Bandaisan	Kobandai	1888	1888	37.601	140.072
	283170	Adatarayama	Numanotaira	1996	1996	37.647	140.281
	283180	Azumayama	Issaikyo (Oana)	1977	1977	37.735	140.244
	283190	Zaozan [Zaosan]	Okama	1940	1940	38.144	140.44
	283200	Naruko		837		38.729	140.734
	283210	Kurikomayama		1950		38.961	140.788
	283220	Chokaisan	E side of Shinzan, W of Kojin-yama	1974	1974	39.099	140.049
	283230	Akita-Komagatake	Me-dake	1970	1971	39.761	140.799
	283240	Iwatesan		1934	1935	39.853	141.001
	283250	Hachimantai		-5350		39.958	140.854
	283260	Akita-Yakeyama	Kare-numa	1997	1997	39.964	140.757
	283262	Megata		-2050		39.95	139.73
	283270	Iwakisan		1863		40.656	140.303
	283271	Towada	Goshikiiwa (NE rim Nakanoumi crater)	915		40.51	140.88
	283280	Hakkodasan	SW flank of O-dake (Jigoku-numa)	1550		40.659	140.877
	283290	Osorezan		1787		41.279	141.12
	284010	Izu-Oshima	Mihara-yama (1987 summit crater)	1990	1990	34.724	139.394
	284011	Toshima	Kajiana crater	-4550		34.52	139.279
	284020	Niijima	Mukai-yama	886		34.397	139.27
	284030	Kozushima	Tenjo-san	838		34.219	139.153
	284040	Miyakejima		2010	2010	34.094	139.526
	284041	Mikurajima	Tsubunegamori & Yasukajigamori domes	-4100		33.874	139.602
	284050	Hachijojima		1707		33.137	139.766
	284060	Aogashima	Maru-yama, SW part of Ikenosawa crater	1780	1785	32.458	139.759
	284070	Myojinsho	Myojinsho	1988	1988	31.888	139.918
	284080	Sumisujima		2005	2005	31.44	140.051
	284090	Izu-Torishima		2013	2013	30.484	140.303
	284091	Sofugan		1975		29.794	140.342
	284096	Nishinoshima		2019	2020	27.247	140.874
	284100	Kaitoku Seamount		1986	1986	26.127	141.102
	284110	Kita-Ioto	Funka-Asane	2003	2003	25.424	141.284
	284120	Ioto	Asodai	2012	2012	24.751	141.289
	284121	Kita-Fukutokutai	24.443 N, 141.378 E	2001	2001	24.417	141.417
	284130	Fukutoku-Oka-no-Ba		2010	2010	24.285	141.481
	284131	Minami-Hiyoshi		1996	1996	23.5	141.935
	284132	Nikko		1979		23.078	142.326
	284133	Fukujin		1982		21.93	143.47
	284134	Kasuga 1	21.78 N 143.71 E	1975		21.765	143.71
	284140	Farallon de Pajaros	SW of Uracas (Makhahnas seamount)	1967	1967	20.546	144.893
	284141	Ahyi		2014	2014	20.42	145.03
	284142	Supply Reef	Volcano Uncertain: NW of Supply Reef (~20.3 N, 144.9E)	1989	1989	20.13	145.1
	284150	Asuncion		1924		19.671	145.406
	284160	Agrigan		1917		18.77	145.67
	284170	Pagan	North Pagan	2012	2012	18.13	145.8
	284180	Alamagan		1887		17.6	145.83
	284190	Guguan		1901		17.307	145.845
	284193	South Sarigan Seamount		2010	2010	16.58	145.78
	284200	Anatahan		2007	2008	16.35	145.67
	284202	Ruby		1995	1995	15.62	145.57
	284210	Esmeralda Bank		1987		15	145.25
	284211	NW Rota-1	Upper South flank (Brimstone Pit)	2003	2010	14.601	144.775
	284305	Mariana Back-Arc Segment at 15.5°N	Along a 10 km N-S line at 15.4°N	2013	2015	15.406	144.506
	285010	Oshima-Oshima	Nishi-yama	1790		41.51	139.367
	285011	Esan		1874		41.805	141.166
	285020	Hokkaido-Komagatake		2000	2000	42.063	140.677
	285030	Toya	Usu N flank (Kompira-yama & W Nishi-yama)	2000	2001	42.544	140.839
	285031	Niseko		-4900		42.875	140.659
	285032	Yoteizan	NW flank (Hangetsu-ko)	-1050		42.827	140.812
	285034	Kuttara	West flank (Jigoku-dani)	1820		42.491	141.16
	285040	Shikotsu	Tarumai	1981	1981	42.688	141.38
	285041	Rishirizan		-5830		45.179	141.242
	285050	Tokachidake	1962-II Crater	2004	2004	43.418	142.686
	285060	Taisetsuzan	Asahi-dake	1739		43.664	142.854
	285061	Maruyama	Maru-yama (No. 1 crater)	1898	1898	43.418	143.031
	285070	Akan	Me-Akan (Ponmachineshiri)	2008	2008	43.384	144.013
	285080	Kussharo	Atosanupuri	1320		43.615	144.427
	285081	Mashu	Kamuinupuri	1080		43.572	144.561
	285082	Rausudake		1800		44.076	145.122
	285083	Tenchozan		100		44.044	145.086
	285090	Shiretoko-Iozan	NW flank	1935	1936	44.133	145.161
	290010	Tomariyama [Golovnin]	Eastern explosion crater	1848		43.844	145.504
	290020	Raususan [Mendeleev]		1900		43.979	145.733
	290030	Chachadake [Tiatia]		1982	1982	44.353	146.252
	290040	Berutarubesan [Berutarube]		1812		44.462	146.932
	290041	Moekeshiwan [Lvinaya Past]		-7480		44.608	146.994
	290050	Etorofu-Atosanupuri [Atosanupuri]		1932		44.808	147.131
	290061	Unnamed	17.5 km NW of Iturup Island	1967		45.022	147.019
	290070	Etorofu-Yakeyama [Grozny Group]	Etorofu-Yake-yama / Ivan Grozny	2013	2013	45.012	147.871
	290080	Sashiusudake [Baransky]		1951		45.1	148.019
	290090	Chirippusan [Chirip]	SE of Bogdan Khmelinitskii summit	1860		45.338	147.92
	290100	Moyorodake [Medvezhia]	Kudriavy	1999	1999	45.389	148.838
	290120	Kolokol Group	Berg	2009		46.042	150.083
	290150	Chirpoi	Snow	2012	2016	46.532	150.871
	290160	Unnamed		1972	1972	46.47	151.28
	290161	Milna	Goriaschaia Sopka	1944		46.815	151.786
	290180	Zavaritzki Caldera	North end of caldera lake	1957	1957	46.925	151.95
	290190	Prevo Peak		1825		47.02	152.12
	290200	Ketoi		2018	2018	47.35	152.475
	290210	Ushishur	SE caldera wall	1884		47.52	152.8
	290211	Srednii		1880	1880	47.6	152.92
	290220	Rasshua		1957		47.77	153.02
	290240	Sarychev Peak		2021	2021	48.092	153.2
	290250	Raikoke		2019	2019	48.292	153.25
	290260	Chirinkotan		2016	2017	48.98	153.48
	290270	Ekarma	Upper SW flank	2010	2010	48.958	153.93
	290290	Sinarka		2014	2014	48.873	154.182
	290300	Kharimkotan	Severgin	1933	1933	49.12	154.508
	290310	Tao-Rusyr Caldera	Krenitzyn Peak (east flank)	1952	1952	49.35	154.7
	290320	Nemo Peak		1938		49.57	154.808
	290340	Fuss Peak		1933		50.267	155.246
	290350	Karpinsky Group	East side of Karpinsky Ridge	1952		50.148	155.373
	290360	Chikurachki		2016	2016	50.324	155.461
	290380	Ebeko		2016	2021	50.686	156.014
	290390	Alaid		2018	2018	50.861	155.565
	300010	Kambalny		2017	2017	51.306	156.875
	300020	Koshelev		1741		51.356	156.753
	300021	Yavinsky	NW flank (Ukho)	-4050		51.533	156.629
	300022	Diky Greben		350		51.452	156.978
	300023	Kurile Lake		-6440		51.45	157.12
	300030	Iliinsky	NE flank	1901		51.498	157.203
	300040	Zheltovsky		1972		51.577	157.328
	300050	Ksudach	Stubel	1907		51.844	157.572
	300053	Khodutka		-300		52.062	157.711
	300060	Mutnovsky		2000	2000	52.449	158.196
	300070	Gorely		2010	2010	52.559	158.03
	300080	Opala		1894		52.543	157.339
	300082	Tolmachev Dol	NW part of Tolmachev Dol	300		52.63	157.58
	300083	Vilyuchik		-8050		52.7	158.28
	300084	Barkhatnaya Sopka		-3550		52.802	158.24
	300090	Koryaksky	Upper NW flank (3000 m)	2008	2009	53.321	158.712
	300100	Avachinsky		2001	2001	53.256	158.836
	300110	Dzenzursky		1957	1957	53.637	158.922
	300120	Zhupanovsky		2016	2016	53.589	159.15
	300121	Veer		1856		53.75	158.45
	300122	Kostakan	Glavny	1350		53.83	158.05
	300123	Bakening	Western flank	-550		53.905	158.07
	300124	Zavaritsky	14 km WNW of Zavaritsky	-800		53.905	158.385
	300125	Akademia Nauk	North margin of Karymsky Lake	1996	1996	53.98	159.45
	300130	Karymsky		2020	2021	54.049	159.443
	300140	Maly Semyachik	Ceno-Semiachik (Toitsky Crater)	1952		54.135	159.674
	300150	Bolshoi Semiachik	Korona and Yezh lava domes	-4450		54.32	160.02
	300160	Taunshits		-550		54.528	159.804
	300170	Uzon	Khloridnoe Lake	200		54.5	159.97
	300180	Kikhpinych	East flank of Savich (Krab cone)	1550		54.489	160.251
	300190	Krasheninnikov	Northern cone (Pauk) & SW of S cone	1550		54.596	160.27
	300200	Kronotsky	Summit and/or south flank (3150 m)	1923		54.753	160.533
	300210	Gamchen	SE flank (Barany, Lukovitsa)	-550		54.974	160.703
	300220	Komarov		950		55.033	160.725
	300221	Vysoky		-550		55.064	160.765
	300230	Kizimen		2010	2013	55.131	160.32
	300240	Tolbachik	Tolbachinsky Dol	2012	2013	55.832	160.326
	300250	Bezymianny		2010	2021	55.972	160.595
	300260	Klyuchevskoy		2019	2021	56.056	160.642
	300261	Ushkovsky		1890		56.113	160.509
	300270	Sheveluch		1999	2021	56.653	161.36
	300271	Piip		-5050		55.42	167.33
	300272	Khangar		1500		54.761	157.407
	300273	Cherpuk Group	North and South Cherpuk	-4550		55.55	157.47
	300280	Ichinsky	SSW flank	1740		55.678	157.718
	300360	Bolshoi-Kekuknaysky	N flank of Kekuknaysky (Kekuk Crater)	-5310		56.483	157.917
	300450	Alney-Chashakondzha	Alney volcano	1600		56.656	159.647
	300511	Shisheika		-2240		57.153	161.09
	300512	Terpuk		-800		57.2	159.83
	300520	Sedanka Lava Field		-7050		57.317	160.067
	300550	Gorny Institute		1250		57.33	160.2
	300551	Kinenin		850		57.35	160.97
	300552	Bliznetsy		-1060		57.35	161.37
	300560	Titila		-550		57.406	160.108
	300590	Elovsky	NE side (Ozernovsky lava flow)	-7550		57.55	160.53
	300650	Nylgimelkin		-3550		57.97	160.65
	300671	Spokoiny		-3450		58.13	160.82
	300680	Ostry	SW flank cinder cone	-2050		58.18	160.82
	300700	Severny	WSW flank (Tobeltsen)	-1550		58.28	160.87
	302030	Udokan Plateau	Chepe	-220		56.28	117.77
	302060	Jom-Bolok	Jom-Bolok (Atkinson cone)	-5180		52.713	99.021
	303010	Taryatu-Chulutu	Horgo cone	-2980		48.133	99.95
	304030	Kunlun Volcanic Group	Ashi Shan	1951		35.52	80.2
	305011	Arxan-Chaihe		0		47.45	120.8
	305030	Wudalianchi	Laoheishan	1776		48.722	126.15
	305040	Jingbo		-520		44.08	128.83
	305050	Longgang Group	Jinlongdingzi	350		42.33	126.5
	305060	Changbaishan	Liuhaojie tuff ring?	1903		41.98	128.08
	306030	Ulreung		-2990		37.5	130.87
	306040	Halla		1007		33.361	126.53
	311020	Kiska	Upper NW? flank	1990	1990	52.103	177.602
	311050	Little Sitkin	Summit and west flank	1828	1830	51.95	178.543
	311060	Semisopochnoi		2021	2021	51.93	179.58
	311070	Gareloi		1996		51.79	-178.794
	311080	Tanaga		1914		51.885	-178.146
	311090	Takawangha		1550		51.873	-178.006
	311110	Kanaga		2012	2012	51.923	-177.168
	311111	Moffett		-1600		51.944	-176.747
	311120	Great Sitkin		2019	2019	52.076	-176.13
	311130	Kasatochi		2008	2008	52.177	-175.508
	311140	Koniuji		-1150		52.22	-175.13
	311160	Atka		1996		52.331	-174.139
	311161	Korovin		2006	2007	52.381	-174.166
	311180	Seguam	Near Pyre Peak	1993	1993	52.315	-172.51
	311190	Amukta		1997		52.5	-171.252
	311210	Yunaska		1937	1937	52.643	-170.629
	311230	Carlisle		1987		52.894	-170.054
	311240	Cleveland		2020	2020	52.825	-169.944
	311260	Kagamil		1929		52.974	-169.72
	311270	Vsevidof	West flank fissure	1957	1957	53.13	-168.693
	311290	Okmok	NE caldera floor	2008	2008	53.43	-168.13
	311300	Bogoslof		2016	2017	53.93	-168.03
	311310	Makushin		1995	1995	53.891	-166.923
	311320	Akutan		1992		54.134	-165.986
	311340	Westdahl	ENE flank (1560-760 m)	1991	1992	54.516	-164.65
	311350	Fisher	Mount Finch	1830		54.65	-164.43
	311360	Shishaldin	Summit crater	2019	2020	54.756	-163.97
	311370	Isanotski		1845		54.765	-163.723
	311380	Roundtop		-7600		54.8	-163.589
	311390	Amak		1796		55.424	-163.149
	312030	Pavlof		2016	2016	55.417	-161.894
	312050	Dana		-1890		55.641	-161.214
	312060	Kupreanof	SSW flank (1575 m)	1987	1987	56.011	-159.797
	312070	Veniaminof		2021	2021	56.17	-159.38
	312080	Black Peak		-1900		56.552	-158.785
	312090	Aniakchak		1951	1951	56.88	-158.17
	312100	Yantarni		-800		57.019	-157.185
	312110	Chiginagak		1998	1998	57.135	-156.99
	312130	Ugashik-Peulik	Peulik	1852		57.751	-156.368
	312131	Ukinrek Maars	West and East Ukinrek Maars	1977	1977	57.832	-156.51
	312140	Martin	Volcano Uncertain: SW of Trident; probably Martin	1953		58.172	-155.361
	312150	Mageik		1946		58.195	-155.253
	312160	Trident	SW flank	1974		58.236	-155.1
	312170	Katmai		1931	1931	58.28	-154.963
	312180	Novarupta		1950		58.27	-155.157
	312190	Griggs		-1790		58.354	-155.092
	312200	Snowy Mountain	NE Snowy Mountain	1710		58.336	-154.682
	312250	Kaguyak	Kaguyak caldera	-3850		58.608	-154.028
	312260	Fourpeaked	Fissure trending N from summit	2006	2006	58.77	-153.672
	313010	Augustine		2005	2006	59.363	-153.43
	313020	Iliamna		1987	1987	60.032	-153.09
	313030	Redoubt	South of 1990 dome	2009	2009	60.485	-152.742
	313040	Spurr	South flank (Crater Peak)	1992	1992	61.299	-152.251
	313050	Hayes		1200		61.64	-152.411
	314010	St. Paul Island	Several km SW of St. Paul	1943		57.18	-170.3
	314060	Imuruk Lake	Lost Jim Cone	300		65.517	-163.45
	315001	Buzzard Creek		-1050		64.062	-148.433
	315020	Wrangell		2002	2002	62.006	-144.017
	315030	Churchill		847		61.38	-141.75
	315040	Edgecumbe		-2220		57.05	-135.75
	320030	Atlin Volcanic Field		1898		59.68	-133.32
	320060	Edziza	SW flank of Ice Peak	950		57.72	-130.63
	320080	Hoodoo Mountain		-7050		56.78	-131.28
	320090	Iskut-Unuk River Cones	Lava Fork	1904		56.58	-130.55
	320100	Tseax River Cone		1690		55.12	-128.9
	320140	Nazko		-5220		52.928	-123.732
	320150	Wells Gray-Clearwater	Kostal Cone	1550		52.33	-120.57
	320180	Meager	NE flank of Plinth Peak	-410		50.63	-123.5
	320200	Garibaldi	SE flank (Opal Cone)	-8060		49.85	-123
	321010	Baker	Sherman Crater	1884		48.777	-121.813
	321020	Glacier Peak		1700		48.112	-121.113
	321030	Rainier		1894	1894	46.853	-121.76
	321040	Adams	East flank?	950		46.206	-121.49
	321050	St. Helens	South of 1980-1986 lava dome	2004	2008	46.2	-122.18
	321060	West Crater	Bare Mountain	-5750		45.88	-122.08
	321070	Indian Heaven	Big Lava Bed	-6250		45.93	-121.82
	322010	Hood	Crater Rock	1907		45.374	-121.695
	322020	Jefferson	S of Jefferson (South Cinder Peak)	950		44.674	-121.8
	322030	Blue Lake Crater		680		44.411	-121.774
	322040	Sand Mountain Field		-950		44.38	-121.93
	322060	Belknap	Belknap Crater	480		44.285	-121.841
	322070	Three Sisters		1853		44.133	-121.767
	322090	Bachelor	North flank (Egan cone)	-5800		43.979	-121.688
	322100	Davis Lake	S flank of Hamner Butte (Black Rock)	-2790		43.57	-121.82
	322110	Newberry	S caldera wall	690		43.722	-121.229
	322160	Crater Lake	Lava dome ENE of Wizard Island	-2850		42.93	-122.12
	322170	Diamond Craters		-5610		43.1	-118.75
	322190	Jordan Craters	Coffeepot Crater	-1250		43.147	-117.46
	323010	Shasta		1786		41.409	-122.193
	323020	Medicine Lake	East flank (Glass Mountain ?)	1910		41.611	-121.554
	323080	Lassen Volcanic Center	Lassen Peak	1914	1917	40.492	-121.508
	323110	Mono Lake Volcanic Field		1890	1890	38	-119.03
	323120	Mono-Inyo Craters	Inyo Craters (S Deadman, Obsidian, Glass Creek)	1380		37.804	-119.029
	323150	Mammoth Mountain	North flank of Mammoth Mountain	1260		37.631	-119.032
	323160	Ubehebe Craters		-150		37.02	-117.45
	323200	Salton Buttes	Rock Hill, N & S Red Hill	210		33.197	-115.616
	324010	Black Butte Crater Lava Field		-8400		43.183	-114.352
	324020	Craters of the Moon	South of Big Craters, near Broken Top	-130		43.42	-113.5
	324030	Wapi Lava Field	Kings Bowl Rift, Wapi Lava Field	-300		42.88	-113.22
	324040	Hell's Half Acre		-3250		43.5	-112.45
	325010	Yellowstone	Indian Pond crater (N of Yellowstone Lake)	-1350		44.43	-110.67
	327040	Markagunt Plateau	Panguitch Lake	1050		37.58	-112.67
	327050	Black Rock Desert	Ice Springs Craters	1290		38.97	-112.5
	327110	Carrizozo	Little Black Peak	-3250		33.78	-105.93
	327120	Zuni-Bandera	McCartys flow	-1170		34.8	-108
	327812	Red Hill	Zuni Salt Lake maar	-9450		34.25	-108.83
	328010	Dotsero		-2200		39.661	-107.035
	329010	Uinkaret Field	Little Springs	1100		36.38	-113.13
	329020	San Francisco Volcanic Field	Sunset Crater and SE-trending fissures	1075		35.347	-111.678
	331010	Endeavour Segment		-3490		47.95	-129.1
	331011	Cobb Segment		-1180		46.88	-129.33
	331020	CoAxial Segment	N end CoAxial segment, Juan de Fuca Ridge	1993	1993	46.52	-129.58
	331021	Axial Seamount	NE flank	2015	2015	45.95	-130
	331030	Cleft Segment	N Cleft Segment, S Juan de Fuca Ridge	1986		44.83	-130.3
	331031	North Gorda Ridge Segment	Near center of North Gorda Ridge segment	1996	1996	42.67	-126.78
	331040	Escanaba Segment	40 deg 59 min North	-2260		40.98	-127.5
	332000	Loihi		1996	1996	18.92	-155.27
	332010	Kilauea		2020	2021	19.421	-155.287
	332020	Mauna Loa	Mokuaweoweo, SW and NE rift zones	1984	1984	19.475	-155.608
	332030	Mauna Kea	NE flank (Puu Lehu, 3130 m)	-2460		19.82	-155.47
	332040	Hualalai	NW rift zone (520 m)	1800	1801	19.692	-155.87
	332060	Haleakala	SW rift zone (180-360 m)	1750		20.708	-156.25
	333010	Teahitia		1985	1985	-17.564	-148.821
	333020	Rocard		1972	1972	-17.662	-148.586
	333030	Moua Pihaa		1970	1970	-18.325	-148.525
	333040	Mehetia	SE of Mehetia (-1700 m?)	1981	1981	-17.874	-148.068
	333050	Adams Seamount		-50		-25.37	-129.27
	333060	Macdonald		1987	1989	-28.98	-140.25
	334020	Northern EPR at 17°N	16.80°N	-50		16.55	-105.32
	334021	Northern EPR at 16°N		-50		15.83	-105.43
	334040	Northern EPR at 10.7°N		2003	2003	10.73	-103.58
	334050	Northern EPR at 9.8°N	East Pacific Rise (9.8 deg N)	2005	2006	9.83	-104.3
	334070	Galapagos Rift		1996		0.792	-86.15
	334100	Southern EPR at 8°S	East Pacific Rise (8.3 deg S)	1964	1969	-8.27	-107.95
	334120	Southern EPR-Segment K		1990		-17.436	-113.206
	334130	Southern EPR-Segment J		1890		-18.175	-113.35
	334140	Southern EPR-Segment I		1915		-18.53	-113.42
	335020	Hollister Ridge	Seamount by Pacific-Antarctic Ridge?	1991	1991	-53.998	-139.845
	335030	Udintsev Transform	Udinstev Fracture Zone	1990	1990	-56.153	-143.373
	341001	Pinacate		1934	1935	31.772	-113.498
	341020	Barcena	South end of Isla San Benedicto	1952	1953	19.3	-110.82
	341021	Socorro	Submarine vent 3 km W of Punta Tosca	1993	1994	18.78	-110.95
	341024	Sanganguey		1742		21.45	-104.73
	341030	Ceboruco	Upper west flank	1870	1875	21.125	-104.508
	341040	Colima		2019	2019	19.514	-103.62
	341060	Michoacan-Guanajuato	Parícutin	1943	1952	19.85	-101.75
	341061	Zitacuaro-Valle de Bravo	West of Valle de Bravo	-3050		19.4	-100.25
	341062	Jocotitlan		1270		19.73	-99.758
	341070	Toluca, Nevado de		-1350		19.108	-99.758
	341080	Chichinautzin	Xitle	400		19.08	-99.13
	341090	Popocatepetl		2005	2021	19.023	-98.622
	341091	Malinche, La		-1170		19.231	-98.032
	341093	Humeros, Los	NW and SE sides of caldera	-4470		19.68	-97.45
	341095	Naolinco Volcanic Field	Rincón de Chapultepec	-1200		19.67	-96.75
	341096	Cofre de Perote	Lower NE flank (El Volcancillo)	1150		19.492	-97.15
	341098	Cumbres, Las	North flank (Yolotepec lava dome)	-3920		19.15	-97.27
	341100	Orizaba, Pico de		1846		19.03	-97.27
	341110	San Martin		1932		18.57	-95.2
	341120	Chichon, El		1982	1982	17.36	-93.228
	341130	Tacana	NE flank (ca. 3600 m)	1986	1986	15.132	-92.109
	342020	Tajumulco		1863		15.043	-91.903
	342030	Santa Maria	SW flank (Santiaguito)	1922	2021	14.757	-91.552
	342040	Almolonga		1891		14.797	-91.519
	342060	Atitlan		1856		14.583	-91.186
	342080	Acatenango	Pico Central-Yepocapa saddle	1972	1972	14.501	-90.876
	342090	Fuego		2002	2021	14.473	-90.88
	342100	Agua		1541		14.465	-90.743
	342110	Pacaya	MacKenney Crater	2015	2021	14.382	-90.601
	342120	Tecuamburro	NW flank (Ixpaco Crater)	-960		14.156	-90.407
	342160	Suchitan		1469		14.4	-89.78
	343010	Apaneca Range		1990		13.872	-89.742
	343020	Santa Ana		2005	2005	13.853	-89.63
	343030	Izalco	SSE flank (550 m below summit)	1966	1966	13.813	-89.633
	343050	San Salvador	Boquerón summit and north flank	1917	1917	13.734	-89.294
	343060	Ilopango	Islas Quemadas	1879	1880	13.672	-89.053
	343080	Tecapa		1878		13.494	-88.502
	343100	San Miguel		2020	2020	13.434	-88.269
	343150	Yojoa, Lago		-7638		14.964	-87.983
	344010	Cosiguina		1859		12.98	-87.57
	344020	San Cristobal		2020	2021	12.702	-87.004
	344040	Telica		2020	2020	12.606	-86.84
	344070	Negro, Cerro	South flank (near Cristo Rey crater)	1999	1999	12.506	-86.702
	344080	Pilas, Las	El Hoyo	1954	1954	12.495	-86.688
	344090	Momotombo		2015	2016	12.423	-86.539
	344091	Apoyeque	Apoyeque	-50		12.242	-86.342
	344092	Nejapa-Miraflores	Nejapa maar	1060		12.12	-86.32
	344100	Masaya		2015	2021	11.985	-86.165
	344110	Mombacho		1850		11.826	-85.968
	344120	Concepcion		2009	2011	11.538	-85.622
	345020	Rincon de la Vieja		2020	2020	10.83	-85.324
	345030	Miravalles	SW flank (near Las Hornillas)	1946	1946	10.748	-85.153
	345033	Arenal	W flank & summit	1968	2010	10.463	-84.703
	345040	Poas		2019	2019	10.2	-84.233
	345050	Barva		1867		10.135	-84.1
	345060	Irazu	Upper NW flank	1994	1994	9.979	-83.852
	345070	Turrialba		2020	2020	10.025	-83.767
	346010	Baru		1550		8.808	-82.543
	351011	Romeral		-5390		5.203	-75.363
	351012	Bravo, Cerro		1720		5.091	-75.293
	351020	Ruiz, Nevado del		2014	2021	4.892	-75.324
	351021	Santa Isabel		-850		4.818	-75.365
	351030	Tolima, Nevado del		1943		4.658	-75.33
	351040	Machin		1180		4.487	-75.389
	351050	Huila, Nevado del	Upper SW side of Pico Central	2008	2012	2.93	-76.03
	351060	Purace		1977	1977	2.32	-76.4
	351070	Dona Juana		1897	1906	1.5	-76.936
	351080	Galeras	Summit crater	2012	2014	1.22	-77.37
	351090	Azufral		-930		1.08	-77.68
	351100	Cumbal		1926	1926	0.95	-77.87
	351110	Chiles-Cerro Negro	Volcano Uncertain: possibly Reventador	1936		0.817	-77.938
	352001	Soche		-6650		0.552	-77.58
	352002	Chachimbiro	NNE flank (Pitzantzi lava dome)	-3740		0.468	-78.287
	352003	Cuicocha		650		0.308	-78.364
	352004	Imbabura	Huarmi Imbabura	-5550		0.258	-78.183
	352006	Cayambe	Upper SE flank	1785	1786	0.029	-77.986
	352010	Reventador		2008	2021	-0.077	-77.656
	352011	Pululahua		290		0.038	-78.463
	352020	Guagua Pichincha		2009	2009	-0.171	-78.598
	352021	Atacazo	Ninahuilca Chico II dome	-320		-0.353	-78.617
	352022	Chacana	South part of caldera	1773		-0.375	-78.25
	352030	Antisana	Volcano Uncertain: possibly Reventador	1801	1802	-0.481	-78.141
	352031	Aliso	Pumayucu	-2450		-0.53	-78
	352040	Sumaco		1933		-0.538	-77.626
	352050	Cotopaxi		2015	2016	-0.677	-78.436
	352060	Quilotoa		1797		-0.85	-78.9
	352071	Chimborazo		550		-1.464	-78.815
	352080	Tungurahua		2011	2016	-1.467	-78.442
	352090	Sangay		2019	2021	-2.005	-78.341
	353010	Fernandina		2020	2020	-0.37	-91.55
	353011	Ecuador		1150		-0.02	-91.546
	353020	Wolf		2015	2015	0.02	-91.35
	353030	Darwin	Volcano Uncertain: more likely Darwin than Wolf, Alcedo	1813	1813	-0.18	-91.28
	353040	Alcedo	South caldera wall	1993		-0.43	-91.12
	353050	Negra, Sierra	Summit crater and NNW flank	2018	2018	-0.83	-91.17
	353060	Azul, Cerro	Summit and SE flank	2008	2008	-0.92	-91.408
	353070	Pinta		1928		0.58	-90.75
	353080	Marchena	West to SW caldera rim	1991	1991	0.33	-90.47
	353090	Santiago	SE flank	1904	1906	-0.22	-90.77
	354000	Quimsachata	Oroscocha	-4450		-14.176	-71.351
	354004	Andahua-Orcopampa		1913		-15.42	-72.33
	354005	Huambo	Cerro Keyocc	-700		-15.83	-72.13
	354006	Sabancaya		2016	2021	-15.787	-71.857
	354010	Misti, El		1985		-16.294	-71.409
	354020	Ubinas		2019	2019	-16.355	-70.903
	354030	Huaynaputina	Summit and south flank	1600	1600	-16.608	-70.85
	354031	Ticsani		1800		-16.755	-70.595
	354040	Tutupaca	Volcano Uncertain: reported from Tutupaca	1902	1902	-17.026	-70.372
	354050	Yucamane		-1320		-17.184	-70.196
	355010	Tacora		1937		-17.72	-69.77
	355011	Taapaca		-320		-18.1	-69.5
	355012	Parinacota	Parinacota 3 edifice	290		-18.166	-69.142
	355020	Guallatiri		1985		-18.42	-69.092
	355030	Isluga		1960		-19.15	-68.83
	355040	Irruputuncu		1995	1995	-20.73	-68.55
	355050	Olca-Paruma		1865	1867	-20.939	-68.413
	355070	San Pedro-San Pablo		1960		-21.888	-68.391
	355090	Putana		1972		-22.557	-67.853
	355100	Lascar		2015	2017	-23.37	-67.73
	355107	Pular		1990	1990	-24.188	-68.054
	355109	Socompa		-5250		-24.396	-68.246
	355110	Llullaillaco		1877		-24.72	-68.53
	355130	Ojos del Salado, Nevados		1993	1993	-27.109	-68.541
	355160	Aracar		1993		-24.29	-67.783
	355210	Blanco, Cerro		-2300		-26.789	-67.765
	357010	Tupungatito		1987	1987	-33.425	-69.797
	357020	San Jose		1960		-33.789	-69.895
	357021	Maipo		1912		-34.164	-69.832
	357030	Tinguiririca		1994	1994	-34.814	-70.352
	357040	Planchon-Peteroa		2018	2019	-35.223	-70.568
	357041	Infiernillo	Volcán Hoyo Colorado	-6890		-35.123	-69.9
	357050	Descabezado Grande	Upper NNE slope	1932	1933	-35.58	-70.75
	357060	Azul, Cerro	Quizapu	1967		-35.653	-70.761
	357061	Maule, Laguna del		-50		-36.058	-70.492
	357063	Longavi, Nevado de		-4890		-36.193	-71.161
	357066	Payun Matru	Escorial del Matru caldera	-5050		-36.422	-69.241
	357070	Chillan, Nevados de	Nicanor crater	2016	2021	-36.868	-71.378
	357072	Tromen		1822		-37.144	-70.033
	357080	Antuco		1972		-37.406	-71.349
	357090	Copahue	Agrio Crater	2020	2020	-37.856	-71.183
	357091	Callaqui		2012	2012	-37.92	-71.45
	357093	Tolhuaca	Pemehue	-4000		-38.31	-71.645
	357100	Lonquimay	NE flank (Navidad Crater)	1988	1990	-38.379	-71.586
	357110	Llaima	Summit and upper east flank	2008	2009	-38.692	-71.729
	357111	Sollipulli	North flank (Redondo, Chufquén)	1240		-38.97	-71.52
	357112	Caburgua-Huelemolle	Huelemolle and Caburgua cones	-5050		-39.25	-71.75
	357120	Villarrica		2014	2021	-39.42	-71.93
	357121	Quetrupillan		1872		-39.496	-71.722
	357122	Lanin		560		-39.637	-71.502
	357123	Huanquihue Group	Achín-Niellu (Volcán Escorial)	1750		-39.887	-71.58
	357130	Mocho-Choshuenco	El Mocho	1937		-39.927	-72.027
	357140	Carran-Los Venados	Mirador	1979	1979	-40.35	-72.07
	357150	Puyehue-Cordon Caulle	Cordón Caulle, N of the 1960 eruption fissure	2011	2012	-40.59	-72.117
	357153	Antillanca Volcanic Complex	Casablanca (Raihuén crater)	-230		-40.783	-72.15
	357160	Puntiagudo-Cordon Cenizos		1930		-40.969	-72.264
	358010	Osorno		1869		-41.105	-72.496
	358012	Cayutue-La Vigueria	La Viguería	-190		-41.25	-72.27
	358020	Calbuco		2015	2015	-41.33	-72.618
	358022	Yate	SE flank	1090		-41.755	-72.396
	358023	Hornopiren		1835		-41.874	-72.431
	358024	Apagado		-590		-41.88	-72.58
	358030	Huequi		1920		-42.377	-72.578
	358040	Michinmahuida		1915		-42.799	-72.445
	358041	Chaiten		2008	2011	-42.833	-72.646
	358049	Yanteles		1835		-43.497	-72.81
	358050	Corcovado		1835		-43.189	-72.794
	358052	Melimoyu		200		-44.08	-72.88
	358054	Mentolat		1710		-44.7	-73.08
	358056	Maca	SW flank (Bahía Pérez)	1560		-45.1	-73.17
	358057	Hudson, Cerro	S and SE edge of the caldera	2011	2011	-45.9	-72.97
	358060	Lautaro		1979		-49.019	-73.504
	358062	Aguilera		-1250		-50.33	-73.75
	358063	Reclus		1908		-50.964	-73.585
	358070	Burney, Monte		1910		-52.33	-73.4
	358080	Pali-Aike Volcanic Field		-5550		-52.082	-69.698
	358090	Fueguino		1820	1820	-54.97	-70.262
	360010	Saba	SW flank	1640		17.63	-63.23
	360020	Quill, The		250		17.478	-62.96
	360030	Liamuiga		1843		17.37	-62.8
	360050	Soufriere Hills		2005	2013	16.72	-62.18
	360060	Soufriere Guadeloupe	SE side of summit (Gouffre Tarissan)	1976	1977	16.044	-61.664
	360100	Trois Pitons, Morne	Micotrin?	920		15.37	-61.33
	360101	Watt, Morne	NE of Watt Mtn (Valley of Desolation)	1997	1997	15.307	-61.305
	360110	Plat Pays, Morne	Morne Patates	1270		15.255	-61.341
	360120	Pelee		1929	1932	14.809	-61.165
	360140	Qualibou	Sulphur Springs area	1766		13.83	-61.05
	360150	Soufriere St. Vincent		2020	2021	13.33	-61.18
	360160	Kick 'em Jenny		2017	2017	12.3	-61.64
	370010	Snaefellsjokull		200		64.8	-23.783
	370030	Ljosufjoll	Raudhalsar	960		64.9	-22.483
	371020	Reykjanes	Reykjaneshryggur (Eldeyjarbodi)	1970		63.817	-22.717
	371022	Eldey	Reykjaneshryggur (NE of Eldey)	1926		63.733	-23
	371030	Krysuvik-Trolladyngja	Tradarfjöll	1340		63.917	-22.067
	371040	Brennisteinsfjoll	Grafeldur (Selvogshraun)	1341		63.933	-21.783
	371050	Hengill	Nesjahraun, Reykjafellshraun	150		64.083	-21.416
	371060	Grimsnes	Kalfsholar	-3500		64.05	-20.883
	371070	Prestahnukur	Sköflungur	-3350		64.583	-20.666
	371080	Langjokull	Hallmundahraun	950		64.85	-19.7
	372010	Vestmannaeyjar	Heimaey (Eldfell)	1973	1973	63.416	-20.266
	372020	Eyjafjallajokull	ENE flank (Fimmvörduháls) and summit	2010	2010	63.633	-19.633
	372030	Katla	W, S, and E margins of caldera	1999	1999	63.633	-19.083
	372050	Torfajokull	N of caldera (Namshraun, Laugahraun)	1477		63.892	-19.122
	372070	Hekla	SW flank	2000	2000	63.983	-19.666
	373010	Grimsvotn	SW part of the caldera	2011	2011	64.416	-17.316
	373012	Thordarhyrna	Grímsvötn and Thordarhyrna	1902	1904	64.267	-17.617
	373030	Bardarbunga	Holuhraun	2014	2015	64.633	-17.516
	373050	Kverkfjoll		1968	1968	64.653	-16.647
	373060	Askja	North of Öskjuvatn lake (Vikraborgir)	1961	1961	65.033	-16.783
	373070	Fremrinamar		1823		65.416	-16.666
	373080	Krafla	Leirhnjúkur to 8.5 km north	1984	1984	65.715	-16.728
	373082	Heidarspordar	Threngslaborgir-Ludentsborgir crater row	-300		65.583	-16.817
	373090	Theistareykir	Storihver (Theistareykjahraun)	-900		65.833	-17.166
	373100	Tjornes Fracture Zone	Immediately north of Manareyjar Island	1867	1868	66.309	-17.118
	374010	Oraefajokull	Caldera, west flank (to 1100 m)	1727	1728	64.05	-16.633
	374020	Esjufjoll		1927		64.25	-16.583
	375010	Kolbeinsey Ridge		1838		66.67	-18.5
	376010	Jan Mayen	Beerenberg (NE flank, 0-200 m)	1985	1985	71.082	-8.155
	377020	East Gakkel Ridge at 85°E	East Gakkel Ridge	1999	1999	85.608	85.25
	381040	Pico Fracture Zone		1865		38.75	-38.08
	382001	Flores	Caldeira Comprida	-950		39.462	-31.216
	382010	Fayal	West flank (Capelinhos) and summit	1957	1958	38.6	-28.73
	382020	Pico	Off NW coast	1963		38.47	-28.4
	382030	San Jorge	Off SW coast	1964		38.65	-28.08
	382040	Graciosa	San Tamao	-1950		39.02	-27.97
	382050	Terceira	Serreta Ridge (submarine vent W of Terceira)	1998	2000	38.73	-27.32
	382070	Don Joao de Castro Bank	NW of Don Joao de Castro Bank	1997	1997	38.23	-26.63
	382080	Sete Cidades	Volcano Uncertain: submarine vent off Sao Miguel	1880		37.87	-25.78
	382081	Picos Volcanic System	Eastern part (SW of Fogo 1 cone)	1652	1652	37.78	-25.67
	382090	Agua de Pau	Lagoa do Fogo caldera	1564	1564	37.77	-25.47
	382100	Furnas	South end of caldera (Pico da Areia)	1630	1630	37.77	-25.32
	382110	Monaco Bank		1911		37.6	-25.88
	382120	Madeira	Paul da Serra	-4500		32.73	-16.97
	383010	La Palma	Teneguia	1971	1971	28.57	-17.83
	383020	Hierro	Submarine S flank, Tagaro cone	2011	2012	27.73	-18.03
	383030	Tenerife	NW rift zone (Chinyero)	1909	1909	28.271	-16.641
	383040	Gran Canaria	Bandama	40		28	-15.58
	383060	Lanzarote	Tao, Nuevo del Fuego, Tinguatón	1824	1824	29.03	-13.63
	384010	Fogo	WSW base of Pico	2014	2015	14.95	-24.35
	385030	Romanche Fracture Zone	0.58 S 15.83 W	1836		-0.433	-19.596
	385050	Ascension	South Sisters lava flow	1508		-7.95	-14.37
	385052	Walvis Ridge at 33°S	Seamount NW of Wüst seamount	2001	2002	-32.958	-5.22
	386010	Tristan da Cunha	North flank	1961	1962	-37.092	-12.28
	386011	Nightingale Island	Submarine SE flank	2004	2004	-37.42	-12.48
	386020	Bouvet		1956		-54.408	3.351
	390010	Buckle Island		1899		-66.78	163.25
	390013	Pleiades, The	NE of Mount Pleiones (Taygete Cone)	-1050		-72.67	165.5
	390015	Melbourne		1892		-74.35	164.7
	390020	Erebus		1972	2021	-77.53	167.17
	390022	Berlin		-8350		-76.05	-136
	390027	Takahe		-5550		-76.28	-112.08
	390028	Hudson Mountains	Webber Nunatak	1985		-74.33	-99.42
	390030	Deception Island		1987		-63.001	-60.652
	390031	Penguin Island	NE flank (Petrel Crater)	1905		-62.1	-57.93
	390041	Paulet		1850		-63.579	-55.78
	390050	Seal Nunataks Group	Dallman, Murdoch	1980		-65.03	-60.05
	390070	Southern Thule	South flank of Bellinghausen Island	1975		-59.442	-27.225
	390080	Bristol Island		2016	2016	-59.017	-26.533
	390081	Montagu Island	NW of Mount Belinda	2001	2007	-58.445	-26.374
	390090	Saunders	Summit crater	2014	2021	-57.8	-26.483
	390100	Candlemas Island	NW flank (Lucifer Hill)	1953		-57.08	-26.67
	390110	Hodson		1930		-56.712	-27.176
	390130	Zavodovski		2016	2016	-56.3	-27.57
	390140	Protector Seamounts		1962		-55.912	-28.167
	600000	Unknown Source	Tropical latitude (SP, 365 ppb sulfate)	1808		0	0

## Sheet: Sheet7
		Year	1	2	3	4	5	6	7	8	9	10	11	12	13	14	15	16	17	18	19	20	21	22	23	24	25	26	27	28	29	30	31	32	33	34	35	36		19	18	17	16	15	14	13	12	11	10
		1967	Ioto	Kelut	Karangetang	Io-Torishima	Karymsky	Kerinci	Tolbachik	Talang	Chikurachki	Semeru	Taal	Tangkuban Parahu	Tambora	Klyuchevskoy	Fukutoku-Oka-no-Ba	Izu-Oshima	Asosan	Slamet	Unnamed	Marapi	Farallon de Pajaros	Tolbachik	Kelut	Ebeko	Merapi
		1968	Kuchinoerabujima	Marapi	Lewotobi	Fukujin	Talang	Banua Wuhu	Awu	Kita-Ioto	Fukutoku-Oka-no-Ba	Izu-Oshima	Io-Torishima	Soputan	Klyuchevskoy	Tolbachik	Kelimutu	Nila	Mayon	Etorofu-Yakeyama [Grozny Group]	Fukutoku-Oka-no-Ba	Kerinci	Taal	Batur	Izu-Oshima	Talang
		1969	Ioto	Lokon-Empung	Taal	Kanlaon	Klyuchevskoy	Tangkuban Parahu	Kerinci	Krakatau	Slamet	Didicas	Supply Reef	Ebulobo	Ebeko	Iya	Izu-Oshima	Ioto
		1970	Karangetang	Taal	Akita-Komagatake	Tolbachik	Marapi	Sorikmarapi	Lewotobi	Sirung	Etorofu-Yakeyama [Grozny Group]	Esmeralda Bank	Izu-Oshima	Kanlaon	Klyuchevskoy	Karymsky	Asosan	Kolokol Group	Soputan	Myojinsho	Izu-Oshima	Tolbachik	Batur
		1971	Klyuchevskoy	Sundoro	Raung	Kirishimayama	Ebeko	Klyuchevskoy	Iya	Kerinci	Soputan	Lokon-Empung	Izu-Oshima	Myojinsho	Bezymianny	Batur	Lewotobi	Merapi
		1972	Paluweh	Merapi	Fukutoku-Oka-no-Ba	Kuchinoerabujima	Alaid	Krakatau	Unnamed	Zheltovsky	Tengger Caldera	Batur	Karangetang
		1973	Fukutoku-Oka-no-Ba	Iliwerung	Kuchinoerabujima	Paluweh	Tolbachik	Fukujin	Lokon-Empung	Slamet	Chikurachki	Kolokol Group	Marapi	Chachadake [Tiatia]	Alaid	Etorofu-Yakeyama [Grozny Group]	Raung	Iliboleng	Nishinoshima	Batur	Asamayama	Dempo	Asosan	Etorofu-Yakeyama [Grozny Group]	Soputan
		1974	Fukutoku-Oka-no-Ba	Niigata-Yakeyama	Sumisujima	Chachadake [Tiatia]	Raung	Kuchinoerabujima	Slamet	Klyuchevskoy	Batur	Chokaisan	Izu-Oshima	Dempo	Ioto
		1975	Kasuga 1	Lokon-Empung	Asosan	Izu-Torishima	Minami-Hiyoshi	Sumisujima	Nishinoshima	Sofugan	Tolbachik	Esmeralda Bank	Krakatau	Raung	Marapi
		1976	Minami-Hiyoshi	Sarychev Peak	Karangetang	Taal	Sumisujima	Fukujin	Fukutoku-Oka-no-Ba	Raung	Kuchinoerabujima	Batur	Bezymianny	Iliwerung	Kusatsu-Shiranesan	Minami-Hiyoshi	Ioto
		1977	Azumayama	Mahawu	Sumisujima	Fukujin	Taal	Toya	Klyuchevskoy	Raung	Asosan	Bezymianny
		1978	Shikotsu	Ioto	Nishinoshima	Bezymianny	Fukujin	Bulusan	Chachadake [Tiatia]	Krakatau	Kanlaon	Shikotsu	Mayon	Karangetang	Minami-Hiyoshi	Raung	Didicas
		1979	Bulusan	Ahyi	Ontakesan	Bezymianny	Krakatau	Myojinsho	Nikko	Peuet Sague	Asosan	Karangetang	Fukujin	Chirinkotan	Dieng Volcanic Complex	Kirishimayama	Bezymianny
		1980	Myojinsho	Paluweh	Kuchinoerabujima	Asosan	Gamalama	Sheveluch	Bezymianny	Kanlaon	Nishinoshima	Gorely	Tengger Caldera	Ekarma	Bezymianny	Marapi	Karangetang	Krakatau	Ioto
		1981	Klyuchevskoy	Alaid	Dieng Volcanic Complex	Asosan	Bezymianny	Chachadake [Tiatia]	Pagan	Alaid	Krakatau	Bulusan	Gamkonora	Shikotsu	Klyuchevskoy	Fukujin
		1982	Marapi	Fukujin	Ioto	Chirpoi	Iliboleng	Kusatsu-Shiranesan	Klyuchevskoy	Asamayama	Soputan	Myojinsho	Raung	Karangetang	Kita-Ioto	Asamayama	Nishinoshima	Esmeralda Bank	Galunggung	Alaid	Klyuchevskoy	Marapi	Ioto	Chachadake [Tiatia]	Fukujin
		1983	Tengger Caldera	Miyakejima	Tangkuban Parahu	Iliwerung	Gamalama	Kusatsu-Shiranesan	Colo	Asosan	Kita-Ioto	Nishinoshima	Marapi	Bulusan	Karangetang	Myojinsho	Iliboleng	Tengger Caldera	Niigata-Yakeyama	Asamayama
		1984	Kaitoku Seamount	Marapi	Suwanosejima	Mayon	Gorely	Lokon-Empung	Soputan	Tengger Caldera	Paluweh	Akan	Asosan	Sheveluch	Klyuchevskoy	Kaitoku Seamount	Bezymianny	Galunggung
		1985	Nishinoshima	Tangkuban Parahu	Kanlaon	Suwanosejima	Supply Reef	Raung	Klyuchevskoy	Sangeang Api	Tokachidake	Bezymianny	Sheveluch	Soputan	Karymsky	Kanlaon	Paluweh
		1986	Bezymianny	Klyuchevskoy	Chikurachki	Izu-Oshima	Myojinsho	Chirinkotan	Merapi	Sarychev Peak	Dieng Volcanic Complex	Talang	Sorikmarapi	Peuet Sague	Nishinoshima	Kaitoku Seamount	Klyuchevskoy	Kanlaon	Iliboleng	Alaid	Fukutoku-Oka-no-Ba	Sheveluch	Bezymianny	Lokon-Empung	Fukutoku-Oka-no-Ba
		1987	Ranakah	Izu-Oshima	Myojinsho	Ebeko	Iliboleng	Fukutoku-Oka-no-Ba	Pagan	Kita-Ioto	Fukutoku-Oka-no-Ba	Esmeralda Bank	Raung	Niigata-Yakeyama	Gamkonora	Kanlaon	Marapi
		1988	Tokachidake	Sheveluch	Pagan	Makian	Slamet	Kanlaon	Asosan	Banda Api	Lokon-Empung	Myojinsho	Bulusan	Pagan	Krakatau	Gamalama	Kita-Fukutokutai	Kikai	Suwanosejima	Akan
		1989	Kanlaon	Supply Reef	Bezymianny	Sumisujima	Kita-Ioto	Karangetang	Izu-Tobu	Etorofu-Yakeyama [Grozny Group]	Soputan	Niigata-Yakeyama	Sheveluch	Asosan	Ebeko	Sumisujima	Sarychev Peak	Kusatsu-Shiranesan
		1990	Kerinci	Unzendake	Izu-Oshima	Asamayama	Gamalama	Suwanosejima	Kelut	Bezymianny	Lewotobi	Raung	Sheveluch
		1991	Kirishimayama	Sumisujima	Iliboleng	Arjuno-Welirang	Raung	Fukutoku-Oka-no-Ba	Peuet Sague	Karangetang	Gamalama	Soputan	Lokon-Empung	Ontakesan	Lewotobi	Iliboleng	Klyuchevskoy	Pinatubo	Barren Island	Ranakah	Kanlaon	Ebeko	Avachinsky
		1992	Fukutoku-Oka-no-Ba	Krakatau	Klyuchevskoy	Sumisujima	Pinatubo	Kanlaon	Asosan	Pagan	Awu	Bezymianny	Minami-Hiyoshi	Klyuchevskoy	Merapi	Kanlaon
		1993	Ioto	Bezymianny	Iliwerung	Sumisujima	Kanlaon	Ijen	Iliboleng	Gamalama	Taftan	Raung	Pinatubo	Mayon	Dieng Volcanic Complex	Pagan
		1994	Barren Island	Bulusan	Dempo	Klyuchevskoy	Ioto	Batur	Fukutoku-Oka-no-Ba	Sumisujima	Raung	Bezymianny	Rinjani	Asosan	Krakatau	Ijen	Sumisujima	Gamalama
		1995	Fukutoku-Oka-no-Ba	Karangetang	Ruby	Kujusan	Bezymianny	Rinjani	Tengger Caldera	Raung	Sumisujima	Raung	Tengger Caldera	Yakedake
		1996	Dieng Volcanic Complex	Suwanosejima	Alaid	Akan	Klyuchevskoy	Karangetang	Adatarayama	Kerinci	Kanlaon	Bezymianny	Krakatau	Gamalama	Pagan	Ruang	Sorikmarapi	Hokkaido-Komagatake	Unzendake	Sumisujima	Minami-Hiyoshi	Akademia Nauk	Karymsky
		1997	Bezymianny	Sumisujima	Fukutoku-Oka-no-Ba	Niigata-Yakeyama	Klyuchevskoy	Alaid	Akita-Yakeyama	Kikai	Sangeang Api	Akita-Yakeyama	Bezymianny	Raung	Krakatau	Kita-Ioto	Sheveluch
		1998	Ibu	Akan	Kerinci	Kita-Ioto	Sumisujima	Hokkaido-Komagatake	Fukutoku-Oka-no-Ba	Klyuchevskoy	Karangetang	Kerinci	Batur	Bezymianny	Sheveluch	Kita-Ioto	Kikai	Peuet Sague	Niigata-Yakeyama
		1999	Moyorodake [Medvezhia]	Ioto	Fukutoku-Oka-no-Ba	Kita-Ioto	Sheveluch	Raung	Ijen	Mayon	Suwanosejima	Iliwerung	Slamet	Marapi	Sheveluch	Lewotobi	Kerinci	Karangetang	Batur	Peuet Sague	Bezymianny	Krakatau	Klyuchevskoy	Suwanosejima
		2000	Peuet Sague	Suwanosejima	Tengger Caldera	Sumisujima	Kita-Ioto	Kikai	Hokkaido-Komagatake	Ijen	Kaba	Klyuchevskoy	Fukutoku-Oka-no-Ba	Bezymianny	Slamet	Mayon	Raung	Mutnovsky	Miyakejima	Krakatau	Soputan	Lokon-Empung	Toya	Mutnovsky	Bezymianny	Marapi	Suwanosejima	Klyuchevskoy	Kita-Ioto	Barren Island	Kikai
		2001	Bezymianny	Karymsky	Sumisujima	Kita-Fukutokutai	Fukutoku-Oka-no-Ba	Kita-Ioto	Avachinsky	Talang	Ioto	Bezymianny	Krakatau	Ibu	Kerinci	Ahyi	Marapi	Nishinoshima	Inielika	Miyakejima	Mayon
		2002	Bezymianny	Lokon-Empung	Fukutoku-Oka-no-Ba	Kanlaon	Klyuchevskoy	Papandayan	Lewotobi	Mayon	Ruang	Sumisujima	Izu-Torishima	Ijen	Raung	Kikai	Klyuchevskoy	Kita-Ioto	Lokon-Empung	Chikurachki
		2003	Sumisujima	Kita-Ioto	Mayon	Lokon-Empung	Gamalama	Bezymianny	Dieng Volcanic Complex	Asosan	NW Rota-1	Leroboleng	Lewotobi	Anatahan	Chikurachki	Mayon	Kita-Ioto	Kanlaon	Kikai	Asamayama
		2004	Miyakejima	Suwanosejima	Soputan	Rinjani	Klyuchevskoy	Asamayama	Marapi	Chirinkotan	Egon	Kerinci	Tengger Caldera	Ioto	Mayon	Awu	Ibu	Raung	Anatahan	Karangetang	Kikai	Tokachidake	Egon	Bezymianny	Asosan
		2005	Soputan	Ambang	Bezymianny	Fukutoku-Oka-no-Ba	Mayon	Raung	Fukutoku-Oka-no-Ba	Kolokol Group	Barren Island	Soputan	Asosan	Miyakejima	Talang	Chikurachki	Sumisujima	Egon	Ebeko	Kanlaon	Klyuchevskoy
		2006	Soputan	Pagan	Bulusan	Dempo	Talang	Miyakejima	Mayon	Karangetang	Tara, Batu	Kanlaon	Bezymianny	Akan	Bulusan	Anatahan	Merapi	Mayon	Miyakejima
		2007	Talang	Anatahan	Krakatau	Kelut	Kerinci	Gamalama	Chikurachki	Raung	Gamkonora	Soputan	Bezymianny	Ontakesan	Talang	Chikurachki	Klyuchevskoy	Tara, Batu
		2008	Koryaksky	Karangetang	Akan	Klyuchevskoy	Kirishimayama	Mayon	Asamayama	Chikurachki	Bezymianny	Raung	Soputan	Merapi	Barren Island	Gamalama	Miyakejima	Egon	Ibu	Kerinci	Karangetang	Asosan	Miyakejima
		2009	Bezymianny	Kirishimayama	Dieng Volcanic Complex	Mayon	Kolokol Group	Klyuchevskoy	Sarychev Peak	Rinjani	Sangeang Api	Slamet	Pagan	Miyakejima	Kerinci	Krakatau	Ebeko	Asamayama	Dieng Volcanic Complex	Dempo
		2010	Tengger Caldera	Kizimen	Bulusan	Merapi	Krakatau	Sarychev Peak	Barren Island	Sinabung	Karangetang	Ebeko	Ekarma	Ioto	Gorely	South Sarigan Seamount	Bezymianny	Pagan	Miyakejima	Kirishimayama	Fukutoku-Oka-no-Ba	Semeru
		2011	Kerinci	Gamalama	Klyuchevskoy	Marapi	Krakatau	Soputan	Lokon-Empung	Asosan	Semeru	Pagan	Klyuchevskoy	Karangetang	Lokon-Empung	Kirishimayama
		2012	Tolbachik	Chirpoi	Pagan	Raung	Paluweh	Alaid	Marapi	Gamalama	Lokon-Empung	Klyuchevskoy	Soputan	Etorofu-Yakeyama [Grozny Group]	Karangetang	Sirung	Marapi	Ioto	Lewotolok
		2013	Nishinoshima	Merapi	Zhupanovsky	Barren Island	Tangkuban Parahu	Sinabung	Iliwerung	Klyuchevskoy	Ketoi	Izu-Torishima	Raung	Chirinkotan	Semeru	Kikai	Kerinci	Mayon	Tangkuban Parahu	Barren Island	Etorofu-Yakeyama [Grozny Group]	Mariana Back-Arc Segment at 15.5°N	Gamkonora
		2014	Gamalama	Sinarka	Raung	Chirinkotan	Lewotobi	Ontakesan	Asosan	Mayon	Kuchinoerabujima	Karangetang	Zhupanovsky	Sangeang Api	Ahyi	Semeru	Krakatau	Merapi	Slamet	Kelut	Karangetang	Marapi	Asosan	Raung
		2015	Kanlaon	Marapi	Tengger Caldera	Rinjani	Alaid	Lokon-Empung	Klyuchevskoy	Gamalama	Sirung	Hakoneyama	Cereme	Asamayama	Kuchinoerabujima	Lokon-Empung	Bulusan	Chikurachki	Soputan	Klyuchevskoy
		2016	Chirinkotan	Zhupanovsky	Kerinci	Ebeko	Asosan	Karymsky	Gamalama	Rinjani	Chikurachki	Bulusan	Kerinci	Chikurachki	Bulusan	Soputan
		2017	Kanlaon	Agung	Dempo	Sarychev Peak	Kirishimayama	Kerinci	Sangeang Api	Bulusan	Marapi	Karymsky	Karangetang	Dieng Volcanic Complex	Nishinoshima	Aira	Kambalny	Ebulobo	Krakatau	Barren Island
		2018	Karangetang	Kuchinoerabujima	Gamalama	Soputan	Barren Island	Ketoi	Sarychev Peak	Alaid	Nishinoshima	Krakatau	Merapi	Karymsky	Marapi	Kerinci	Dieng Volcanic Complex	Kirishimayama	Karangetang	Kusatsu-Shiranesan	Mayon	Kadovar
		2019	Nishinoshima	Kikai	Asamayama	Tangkuban Parahu	Raikoke	Sarychev Peak	Asosan	Klyuchevskoy	Tengger Caldera	Karymsky	Sinabung
		2020	Merapi	Tengger Caldera	Lewotolok	Kikai	Kuchinoerabujima	Sinabung	Raung	Kikai	Karymsky	Soputan	Taal	Kuchinoerabujima
[truncated: 10 more columns]

## Sheet: Sheet8
		Year	1	2	3	4	5	6	7	8	9	10	11	12	13	14	15	16	17	18	19
		1967	Irazu	Poas
		1968	Arenal	Poas
		1969	Poas
		1970	Poas
		1971	La Palma	Soufriere St. Vincent
		1972	Kick 'em Jenny	Poas
		1973	Galeras
		1974	Poas	Kick 'em Jenny	Galeras	Irazu
		1975
		1976	Soufriere Guadeloupe	Poas
		1977	Poas	Kick 'em Jenny	Poas	Purace	Irazu	Kick 'em Jenny
		1978	Poas
		1979	Poas	Soufriere St. Vincent
		1980	Poas	Poas
		1981	Poas
		1982
		1983
		1984	Ruiz, Nevado del
		1985	Ruiz, Nevado del
		1986
		1987	Poas
		1988	Kick 'em Jenny
		1989	Galeras
		1990	Kick 'em Jenny	Galeras
		1991	Poas
		1992	Poas	Poas
		1993	Galeras
		1994	Irazu	Ruiz, Nevado del	Poas
		1995	Soufriere Hills	Fogo
		1996	Poas
		1997	Watt, Morne	Don Joao de Castro Bank
		1998	Terceira
		1999
		2000	Galeras
		2001	Kick 'em Jenny
		2002	Galeras
		2003
		2004	Galeras	Soufriere Hills
		2005	Galeras	Soufriere Hills
		2006	Poas	Poas
		2007	Galeras	Huila, Nevado del
		2008	Huila, Nevado del	Galeras	Poas	Huila, Nevado del
		2009	Poas	Poas
		2010	Galeras	Turrialba	Turrialba
		2011	Hierro	Galeras	Turrialba
		2012	Galeras	Ruiz, Nevado del	Turrialba
		2013	Turrialba
		2014	Fogo	Ruiz, Nevado del	Turrialba
		2015	Kick 'em Jenny	Turrialba
		2016	Poas
		2017	Poas	Kick 'em Jenny
		2018
		2019	Poas
		2020	Soufriere St. Vincent	Turrialba

## Sheet: Sheet9
	19
	18
	17
	16
	15
	14
	13
	12
	11
	10
	9
	8
	7
	6											Kick 'em Jenny
	5											Irazu
	4								Irazu			Purace																															Huila, Nevado del
	3								Galeras			Poas																	Poas														Poas		Turrialba	Turrialba	Turrialba		Turrialba
	2	Poas	Poas			Soufriere St. Vincent	Poas		Kick 'em Jenny		Poas	Kick 'em Jenny		Soufriere St. Vincent	Poas										Galeras		Poas		Ruiz, Nevado del	Fogo		Don Joao de Castro Bank							Soufriere Hills	Soufriere Hills	Poas	Huila, Nevado del	Galeras	Poas	Turrialba	Galeras	Ruiz, Nevado del		Ruiz, Nevado del
	1	Irazu	Arenal	Poas	Poas	La Palma	Kick 'em Jenny	Galeras	Poas		Soufriere Guadeloupe	Poas	Poas	Poas	Poas	Poas			Ruiz, Nevado del	Ruiz, Nevado del		Poas	Kick 'em Jenny	Galeras	Kick 'em Jenny	Poas	Poas	Galeras	Irazu	Soufriere Hills	Poas	Watt, Morne	Terceira		Galeras	Kick 'em Jenny	Galeras		Galeras	Galeras	Poas	Galeras	Huila, Nevado del	Poas	Galeras	Hierro	Galeras	Turrialba	Fogo
	year	1967	1968	1969	1970	1971	1972	1973	1974	1975	1976	1977	1978	1979	1980	1981	1982	1983	1984	1985	1986	1987	1988	1989	1990	1991	1992	1993	1994	1995	1996	1997	1998	1999	2000	2001	2002	2003	2004	2005	2006	2007	2008	2009	2010	2011	2012	2013	2014
[truncated: 6 more columns]

## Sheet: WA
		Year	1	2	3	4	5	6	7	8	9	10	11	12	13	14	15	16	17	18	19	20	21	22	23	24	25	26	27	28	29	30	31	32	33	34	35	36		19	18	17	16	15	14	13	12	11	10
		1967	24.751	-7.93	2.781	27.881	54.049	-1.697	55.832	-0.979	50.324	-8.108	14.002	-6.77	-8.25	56.056	24.285	34.724	32.884	-7.242	45.022	-0.38	20.546	55.832	-7.93	50.686	-7.54
		1968	30.443	-0.38	-8.542	21.93	-0.979	3.138	3.689	25.424	24.285	34.724	27.881	1.112	56.056	55.832	-8.77	-6.73	13.257	45.012	24.285	-1.697	14.002	-8.242	34.724	-0.979
		1969	24.751	1.358	14.002	10.412	56.056	-6.77	-1.697	-6.102	-7.242	19.077	20.13	-8.817	50.686	-8.891	34.724	24.751
		1970	2.781	14.002	39.761	55.832	-0.38	0.686	-8.542	-8.508	45.012	15	34.724	10.412	56.056	54.049	32.884	46.042	1.112	31.888	34.724	55.832	-8.242
		1971	56.056	-7.3	-8.119	31.934	50.686	56.056	-8.891	-1.697	1.112	1.358	34.724	31.888	55.972	-8.242	-8.542	-7.54
		1972	-8.32	-7.54	24.285	30.443	50.861	-6.102	46.47	51.577	-7.942	-8.242	2.781
		1973	24.285	-8.53	30.443	-8.32	55.832	21.93	1.358	-7.242	50.324	46.042	-0.38	44.353	50.861	45.012	-8.119	-8.342	27.247	-8.242	36.406	-4.016	32.884	45.012	1.112
		1974	24.285	36.921	31.44	44.353	-8.119	30.443	-7.242	56.056	-8.242	39.099	34.724	-4.016	24.751
		1975	21.765	1.358	32.884	30.484	23.5	31.44	27.247	29.794	55.832	15	-6.102	-8.119	-0.38
		1976	23.5	48.092	2.781	14.002	31.44	21.93	24.285	-8.119	30.443	-8.242	55.972	-8.53	36.618	23.5	24.751
		1977	37.735	1.352	31.44	21.93	14.002	42.544	56.056	-8.119	32.884	55.972
		1978	42.688	24.751	27.247	55.972	21.93	12.769	44.353	-6.102	10.412	42.688	13.257	2.781	23.5	-8.119	19.077
		1979	12.769	20.42	35.893	55.972	-6.102	31.888	23.078	4.903	32.884	2.781	21.93	48.98	-7.2	31.934	55.972
		1980	31.888	-8.32	30.443	32.884	0.8	56.653	55.972	10.412	27.247	52.559	-7.942	48.958	55.972	-0.38	2.781	-6.102	24.751
		1981	56.056	50.861	-7.2	32.884	55.972	44.353	18.13	50.861	-6.102	12.769	1.38	42.688	56.056	21.93
		1982	-0.38	21.93	24.751	46.532	-8.342	36.618	56.056	36.406	1.112	31.888	-8.119	2.781	25.424	36.406	27.247	15	-7.25	50.861	56.056	-0.38	24.751	44.353	21.93
		1983	-7.942	34.094	-6.77	-8.53	0.8	36.618	-0.162	32.884	25.424	27.247	-0.38	12.769	2.781	31.888	-8.342	-7.942	36.921	36.406
		1984	26.127	-0.38	29.638	13.257	52.559	1.358	1.112	-7.942	-8.32	43.384	32.884	56.653	56.056	26.127	55.972	-7.25
		1985	27.247	-6.77	10.412	29.638	20.13	-8.119	56.056	-8.2	43.418	55.972	56.653	1.112	54.049	10.412	-8.32
		1986	55.972	56.056	50.324	34.724	31.888	48.98	-7.54	48.092	-7.2	-0.979	0.686	4.903	27.247	26.127	56.056	10.412	-8.342	50.861	24.285	56.653	55.972	1.358	24.285
		1987	-8.62	34.724	31.888	50.686	-8.342	24.285	18.13	25.424	24.285	15	-8.119	36.921	1.38	10.412	-0.38
		1988	43.418	56.653	18.13	0.32	-7.242	10.412	32.884	-4.523	1.358	31.888	12.769	18.13	-6.102	0.8	24.417	30.793	29.638	43.384
		1989	10.412	20.13	55.972	31.44	25.424	2.781	34.9	45.012	1.112	36.921	56.653	32.884	50.686	31.44	48.092	36.618
		1990	-1.697	32.761	34.724	36.406	0.8	29.638	-7.93	55.972	-8.542	-8.119	56.653
		1991	31.934	31.44	-8.342	-7.733	-8.119	24.285	4.903	2.781	0.8	1.112	1.358	35.893	-8.542	-8.342	56.056	15.13	12.278	-8.62	10.412	50.686	53.256
		1992	24.285	-6.102	56.056	31.44	15.13	10.412	32.884	18.13	3.689	55.972	23.5	56.056	-7.54	10.412
		1993	24.751	55.972	-8.53	31.44	10.412	-8.058	-8.342	0.8	28.6	-8.119	15.13	13.257	-7.2	18.13
		1994	12.278	12.769	-4.016	56.056	24.751	-8.242	24.285	31.44	-8.119	55.972	-8.42	32.884	-6.102	-8.058	31.44	0.8
		1995	24.285	2.781	15.62	33.086	55.972	-8.42	-7.942	-8.119	31.44	-8.119	-7.942	36.227
		1996	-7.2	29.638	50.861	43.384	56.056	2.781	37.647	-1.697	10.412	55.972	-6.102	0.8	18.13	2.3	0.686	42.063	32.761	31.44	23.5	53.98	54.049
		1997	55.972	31.44	24.285	36.921	56.056	50.861	39.964	30.793	-8.2	39.964	55.972	-8.119	-6.102	25.424	56.653
		1998	1.488	43.384	-1.697	25.424	31.44	42.063	24.285	56.056	2.781	-1.697	-8.242	55.972	56.653	25.424	30.793	4.903	36.921
		1999	45.389	24.751	24.285	25.424	56.653	-8.119	-8.058	13.257	29.638	-8.53	-7.242	-0.38	56.653	-8.542	-1.697	2.781	-8.242	4.903	55.972	-6.102	56.056	29.638
		2000	4.903	29.638	-7.942	31.44	25.424	30.793	42.063	-8.058	-3.522	56.056	24.285	55.972	-7.242	13.257	-8.119	52.449	34.094	-6.102	1.112	1.358	42.544	52.449	55.972	-0.38	29.638	56.056	25.424	12.278	30.793
		2001	55.972	54.049	31.44	24.417	24.285	25.424	53.256	-0.979	24.751	55.972	-6.102	1.488	-1.697	20.42	-0.38	27.247	-8.73	34.094	13.257
		2002	55.972	1.358	24.285	10.412	56.056	-7.32	-8.542	13.257	2.3	31.44	30.484	-8.058	-8.119	30.793	56.056	25.424	1.358	50.324
		2003	31.44	25.424	13.257	1.358	0.8	55.972	-7.2	32.884	14.601	-8.365	-8.542	16.35	50.324	13.257	25.424	10.412	30.793	36.406
		2004	34.094	29.638	1.112	-8.42	56.056	36.406	-0.38	48.98	-8.676	-1.697	-7.942	24.751	13.257	3.689	1.488	-8.119	16.35	2.781	30.793	43.418	-8.676	55.972	32.884
		2005	1.112	0.75	55.972	24.285	13.257	-8.119	24.285	46.042	12.278	1.112	32.884	34.094	-0.979	50.324	31.44	-8.676	50.686	10.412	56.056
		2006	1.112	18.13	12.769	-4.016	-0.979	34.094	13.257	2.781	-7.791	10.412	55.972	43.384	12.769	16.35	-7.54	13.257	34.094
		2007	-0.979	16.35	-6.102	-7.93	-1.697	0.8	50.324	-8.119	1.38	1.112	55.972	35.893	-0.979	50.324	56.056	-7.791
		2008	53.321	2.781	43.384	56.056	31.934	13.257	36.406	50.324	55.972	-8.119	1.112	-7.54	12.278	0.8	34.094	-8.676	1.488	-1.697	2.781	32.884	34.094
		2009	55.972	31.934	-7.2	13.257	46.042	56.056	48.092	-8.42	-8.2	-7.242	18.13	34.094	-1.697	-6.102	50.686	36.406	-7.2	-4.016
		2010	-7.942	55.131	12.769	-7.54	-6.102	48.092	12.278	3.17	2.781	50.686	48.958	24.751	52.559	16.58	55.972	18.13	34.094	31.934	24.285	-8.108
		2011	-1.697	0.8	56.056	-0.38	-6.102	1.112	1.358	32.884	-8.108	18.13	56.056	2.781	1.358	31.934
		2012	55.832	46.532	18.13	-8.119	-8.32	50.861	-0.38	0.8	1.358	56.056	1.112	45.012	2.781	-8.508	-0.38	24.751	-8.274
		2013	27.247	-7.54	53.589	12.278	-6.77	3.17	-8.53	56.056	47.35	30.484	-8.119	48.98	-8.108	30.793	-1.697	13.257	-6.77	12.278	45.012	15.406	1.38
		2014	0.8	48.873	-8.119	48.98	-8.542	35.893	32.884	13.257	30.443	2.781	53.589	-8.2	20.42	-8.108	-6.102	-7.54	-7.242	-7.93	2.781	-0.38	32.884	-8.119
		2015	10.412	-0.38	-7.942	-8.42	50.861	1.358	56.056	0.8	-8.508	35.233	-6.895	36.406	30.443	1.358	12.769	50.324	1.112	56.056
		2016	48.98	53.589	-1.697	50.686	32.884	54.049	0.8	-8.42	50.324	12.769	-1.697	50.324	12.769	1.112
		2017	10.412	-8.343	-4.016	48.092	31.934	-1.697	-8.2	12.769	-0.38	54.049	2.781	-7.2	27.247	31.593	51.306	-8.817	-6.102	12.278
		2018	2.781	30.443	0.8	1.112	12.278	47.35	48.092	50.861	27.247	-6.102	-7.54	54.049	-0.38	-1.697	-7.2	31.934	2.781	36.618	13.257	-3.608
		2019	27.247	30.793	36.406	-6.77	48.292	48.092	32.884	56.056	-7.942	54.049	3.17
		2020	-7.54	-7.942	-8.274	30.793	30.443	3.17	-8.119	30.793	54.049	1.112	14.002	30.443
[truncated: 10 more columns]

[truncated: 3 more sheets: WO, EA, EO]
