# Supplementary material for: Clear anti-phase tendency of volcanic eruptions and consistent U.S. Dollar Index response to volcanic forcing
Source: Research Square preprint supplement (doi:10.21203/rs.3.rs-602091/v1), 2021-07-12
Supplement: Supplementary file 11 [file data_PDO_SOI_PZI.xlsx]

## Sheet: Ann
	Date	PDO	SOI	PZI	TMX
	1967	-0.741667	0.475	0.38	63.83
	1968	-0.154167	0.391667	0.72	63.21
	1969	-0.344167	-0.35	0.6	63.19
	1970	-0.404167	0.475	0.24	63.55
	1971	-1.31583	1.10833	0.53	63.53
	1972	-1.14417	-0.483333	1.17	63.08
	1973	-1.13667	0.741667	1.64	63.82
	1974	-0.3025	1.1	0.39	64.32
	1975	-1.41167	1.33333	1.47	63.23
	1976	-0.149167	0.316667	-0.38	64.07
	1977	0.045	-0.633333	-0.38	64.58
	1978	0.0716667	-0.0666667	0.21	62.77
	1979	0.1075	0.141667	1.1	62.71
	1980	0.308333	-0.0666667	-0.62	64.44
	1981	0.838333	0.241667	-0.38	65.07
	1982	-0.2575	-0.875	1.69	62.83
	1983	1.24833	-0.758333	1.58	63.07
	1984	0.603333	0.141667	1.1	63.59
	1985	0.0266667	0.283333	0.47	63.05
	1986	1.0075	-0.0833333	0.72	64.9
	1987	1.13667	-0.933333	-0.55	65.34
	1988	-0.0383333	0.816667	-1.59	65.18
	1989	-0.504167	0.708333	-0.07	63.97
	1990	-0.826667	-0.116667	0.18	65.63
	1991	-0.879167	-0.575	0.56	64.8
	1992	0.76	-0.825	0.76	64.13
	1993	1.04333	-0.65	1.53	62.68
	1994	-0.493333	-0.825	0.14	64.8
	1995	0.439167	-0.0166667	1.05	64.34
	1996	0.683333	0.675	1.43	63.71
	1997	1.31667	-0.733333	0.95	63.72
	1998	-0.478333	-0.025	0.68	65.63
	1999	-1.84333	0.85	-0.71	66.2
	2000	-1.12583	0.85	-1.42	65.31
	2001	-1.13417	0.258333	-0.77	65.64
	2002	-0.439167	-0.325	-0.56	65.19
	2003	0.381667	-0.0916667	0.19	65.11
	2004	-0.224167	-0.258333	1.24	64.61
	2005	-0.188333	-0.183333	-0.1	65.49
	2006	-0.350833	0.025	-0.69	66.41
	2007	-0.7025	0.266667	-0.77	65.64
	2008	-1.66333	1.125	0.36	64.45
	2009	-1.03167	0.166667	1.15	64.17
	2010	-1.06083	0.908333	0.4	64.66
	2011	-1.81167	1.4	-0.34	65.16
	2012	-1.73333	0.133333	-2	67.69
	2013	-1.16583	0.45	0.27	64.15
	2014	0.549167	-0.133333	0.38	64.34
	2015	0.92	-0.791667	0.91	66.07
	2016	0.6725	-0.191667	-0.33	66.69
	2017	-0.0933333	0.358333	0.07	66.35
	2018	-0.3625	0.266667	0.69	65.09
	2019	-0.145833	-0.5	1.61	64.08
	2020	-1.13667	0.466667	-0.35	66.33

## Sheet: PDOmon
	Pacific Decadal Oscillation (PDO)
	https://www.ncdc.noaa.gov/teleconnections/pdo/
	Date	Value
	185401	0.11
	185402	-0.24
	185403	-0.4
	185404	-0.44
	185405	-0.54
	185406	-0.3
	185407	-0.1
	185408	-1.24
	185409	-1
	185410	-2.23
	185411	-1.68
	185412	-1.76
	185501	-0.2
	185502	-0.39
	185503	-0.24
	185504	-0.58
	185505	-1.34
	185506	-1.88
	185507	-1.13
	185508	-0.48
	185509	-0.76
	185510	-0.63
	185511	-0.41
	185512	-0.88
	185601	-0.39
	185602	0.47
	185603	0.42
	185604	-0.96
	185605	-1.26
	185606	-2.15
	185607	-0.69
	185608	0.63
	185609	0.58
	185610	0.59
	185611	0.23
	185612	0.04
	185701	-0.52
	185702	-1.67
	185703	-1.05
	185704	-0.81
	185705	-0.65
	185706	1.03
	185707	1.17
	185708	0.81
	185709	0.84
	185710	0.7
	185711	0.38
	185712	-0.55
	185801	-0.96
	185802	-1.53
	185803	-1.76
	185804	-0.82
	185805	0.49
	185806	2.19
	185807	1.05
	185808	0.67
	185809	1.38
	185810	2.35
	185811	0.46
	185812	-1.16
	185901	-1.22
	185902	-1.71
	185903	-2.46
	185904	-3.65
	185905	-2.86
	185906	-1.99
	185907	-1.01
	185908	-1.26
	185909	-1.19
	185910	-1.31
	185911	-1.14
	185912	-1.12
	186001	-1.31
	186002	-1.28
	186003	-1.34
	186004	-0.77
	186005	-0.85
	186006	-1.26
	186007	-0.27
	186008	-0.4
	186009	0.33
	186010	-1.7
	186011	-1.18
	186012	-1.42
	186101	-0.57
	186102	-0.84
	186103	-0.86
	186104	-0.83
	186105	-0.37
	186106	-0.35
	186107	-0.61
	186108	-0.8
	186109	-1.2
	186110	-1.58
	186111	-1.8
	186112	-1.65
	186201	-0.41
	186202	-0.13
	186203	0.16
	186204	0.07
	186205	0.09
	186206	-0.08
	186207	-0.12
	186208	-0.2
	186209	-0.98
	186210	-0.8
	186211	-0.39
	186212	0.07
	186301	-0.06
	186302	-0.34
	186303	-0.37
	186304	-0.18
	186305	0.03
	186306	-0.03
	186307	0.07
	186308	-0.26
	186309	0.05
	186310	0.07
	186311	0.11
	186312	-0.23
	186401	-0.19
	186402	-0.09
	186403	-1.04
	186404	-1
	186405	-0.78
	186406	-0.66
	186407	-0.19
	186408	-0.48
	186409	-0.21
	186410	0.23
	186411	0.53
	186412	0.5
	186501	-0.28
	186502	-0.54
	186503	-0.48
	186504	-0.16
	186505	-0.15
	186506	-0.66
	186507	-0.96
	186508	-0.69
	186509	-0.73
	186510	-0.61
	186511	-0.62
	186512	-0.76
	186601	-2.31
	186602	-2.27
	186603	-2.22
	186604	-1.16
	186605	-0.68
	186606	-0.84
	186607	-0.55
	186608	-0.4
	186609	-0.35
	186610	-0.17
	186611	-0.07
	186612	-0.29
	186701	-0.14
	186702	-0.29
	186703	-0.48
	186704	-0.43
	186705	-0.34
	186706	-0.14
	186707	0.16
	186708	-0.34
	186709	-0.29
	186710	-0.89
	186711	-0.28
	186712	0.76
	186801	0.98
	186802	0.26
	186803	0.03
	186804	-0.39
	186805	-0.43
	186806	-0.22
	186807	0.11
	186808	-0.02
	186809	0.09
	186810	-0.2
	186811	-0.63
	186812	-0.81
	186901	-0.84
	186902	-0.16
	186903	0.33
	186904	1.23
	186905	3.56
	186906	3.84
	186907	3.78
	186908	1.2
	186909	-0.12
	186910	-0.4
	186911	-0.63
	186912	-0.46
	187001	0.23
	187002	-0.19
	187003	0.03
	187004	-0.3
	187005	-0.14
	187006	-0.37
	187007	-0.13
	187008	0.05
	187009	-0.49
	187010	-0.7
	187011	-0.88
	187012	-0.94
	187101	-0.44
	187102	0
	187103	-0.18
	187104	-0.51
	187105	-0.93
	187106	-0.36
	187107	-0.38
	187108	-0.09
	187109	-0.58
	187110	-0.8
	187111	-0.9
	187112	-0.29
	187201	-0.39
	187202	-0.55
	187203	-0.2
	187204	-0.49
	187205	-0.03
	187206	-0.82
	187207	-0.95
	187208	-1.02
	187209	-0.51
	187210	-0.11
	187211	-1.74
	187212	-2.1
	187301	-2.06
	187302	-2.11
	187303	-1.67
	187304	-0.69
	187305	-0.49
	187306	-0.8
	187307	-1.14
	187308	-1.05
	187309	-0.87
	187310	-0.7
	187311	-1.06
	187312	-0.86
	187401	-0.74
	187402	-1.18
	187403	-0.24
	187404	0.16
	187405	0.01
	187406	-0.26
	187407	-0.21
	187408	0.31
	187409	0.15
	187410	-0.04
	187411	0
	187412	-1.13
	187501	-1.42
	187502	-1.53
	187503	-1.18
	187504	-1.24
	187505	-0.65
	187506	-0.79
	187507	-0.64
	187508	-0.8
	187509	-0.64
	187510	-1.19
	187511	-0.9
	187512	0.11
	187601	-0.96
	187602	-0.74
	187603	-0.91
	187604	-1.53
	187605	-1.57
	187606	-0.82
	187607	-2.21
	187608	-2.16
	187609	-1.48
	187610	-0.4
	187611	-0.04
	187612	-0.24
	187701	-0.13
	187702	-0.08
	187703	-0.08
	187704	-0.68
	187705	-0.82
	187706	-1.18
	187707	-0.37
	187708	-0.62
	187709	-0.24
	187710	0.02
	187711	0.46
	187712	0.07
	187801	0.18
	187802	0.85
	187803	0.96
	187804	1.49
	187805	1.48
	187806	0.9
	187807	0.46
	187808	-0.63
	187809	-1.97
	187810	-1.68
	187811	-0.51
	187812	1.31
	187901	0.2
	187902	0.13
	187903	0.23
	187904	0.61
	187905	-0.56
	187906	-0.91
	187907	-1.6
	187908	-0.62
	187909	-0.52
	187910	-0.75
	187911	-0.64
	187912	-0.2
	188001	0.44
	188002	-0.45
	188003	-1.51
	188004	-2.42
	188005	-2.97
	188006	-3.15
	188007	-2.27
	188008	-1.79
	188009	-1.77
	188010	0.02
	188011	-0.4
	188012	-0.06
	188101	-0.48
	188102	-0.15
	188103	-0.02
	188104	0.17
	188105	0.5
	188106	0.24
	188107	-1.3
	188108	-2.31
	188109	0.16
	188110	0.34
	188111	0.2
	188112	-0.55
	188201	-2.06
	188202	-1.92
	188203	-1.79
	188204	-1.6
	188205	-1.51
	188206	-1.71
	188207	-3.18
	188208	-1.1
	188209	-0.81
	188210	-1.07
	188211	-0.34
	188212	0.66
	188301	-0.97
	188302	-1.32
	188303	-1.4
	188304	-0.32
	188305	-0.67
	188306	-1.25
	188307	-2.82
	188308	-2.36
	188309	-1.75
	188310	-1.47
	188311	-1.07
	188312	-1.67
	188401	-1.77
	188402	-1.95
	188403	-1.42
	188404	-0.53
	188405	0.41
	188406	0.84
	188407	1.1
	188408	1
	188409	0.74
	188410	1.08
	188411	2.16
	188412	2.35
	188501	2.57
	188502	1.02
	188503	1.72
	188504	1.47
	188505	0.7
	188506	-0.41
	188507	-0.68
	188508	-0.06
	188509	-0.15
	188510	-0.05
	188511	-0.32
	188512	-0.34
	188601	-0.52
	188602	0.62
	188603	-0.48
	188604	0.35
	188605	-0.2
	188606	-1.17
	188607	-0.3
	188608	-0.39
	188609	-0.44
	188610	-1.3
	188611	-2.63
	188612	-1.79
	188701	-0.93
	188702	-1.41
	188703	-2.04
	188704	-1.49
	188705	-0.33
	188706	0.69
	188707	1.54
	188708	-0.87
	188709	-1.96
	188710	-1.33
	188711	-0.97
	188712	-1.07
	188801	-0.98
	188802	-0.11
	188803	0.1
	188804	0.02
	188805	1.48
	188806	1.68
	188807	1.78
	188808	1.13
	188809	1.04
	188810	0.6
	188811	0.76
	188812	0.47
	188901	0.44
	188902	-0.01
	188903	0.14
	188904	0.88
	188905	1.16
	188906	1.12
	188907	0.13
	188908	-1.02
	188909	-1.27
	188910	-0.42
	188911	1.34
	188912	-0.16
	189001	-0.66
	189002	-1.09
	189003	-1.49
	189004	-1.1
	189005	-1.34
	189006	-3.41
	189007	-1.4
	189008	-0.99
	189009	0.83
	189010	-0.45
	189011	-1.04
	189012	-1.31
	189101	-0.52
	189102	-0.8
	189103	-1.02
	189104	-0.48
	189105	0.87
	189106	1.01
	189107	1.13
	189108	0.64
	189109	0.3
	189110	0.89
	189111	0.03
	189112	-0.18
	189201	-1.15
	189202	-1.42
	189203	-0.96
	189204	-1.32
	189205	-2.76
	189206	-1.94
	189207	-1.65
	189208	-2.85
	189209	-2.46
	189210	-2.82
	189211	-2.36
	189212	-1.13
	189301	-0.51
	189302	-0.67
	189303	-0.93
	189304	-1.6
	189305	-2.45
	189306	-2.13
	189307	-2.14
	189308	-0.41
	189309	0.06
	189310	-0.54
	189311	-0.71
	189312	-1.49
	189401	-1.42
	189402	-2.17
	189403	-3.2
	189404	-3.15
	189405	-3.35
	189406	-2.75
	189407	-2.98
	189408	-1.91
	189409	-2.02
	189410	-2.56
	189411	-2.77
	189412	-1.17
	189501	-0.86
	189502	-0.64
	189503	-0.65
	189504	-1.13
	189505	-0.48
	189506	-0.74
	189507	0.43
	189508	-0.16
	189509	-1.34
	189510	-0.84
	189511	-1.23
	189512	-0.27
	189601	0.32
	189602	0.2
	189603	-0.17
	189604	-0.91
	189605	-1.32
	189606	-0.68
	189607	-0.32
	189608	-0.18
	189609	0.99
	189610	0.26
	189611	0.29
	189612	0.21
	189701	0.38
	189702	-0.29
	189703	-0.62
	189704	-0.06
	189705	0.67
	189706	0.8
	189707	0.57
	189708	0
	189709	-0.7
	189710	0.31
	189711	0.58
	189712	0.05
	189801	-0.08
	189802	-0.27
	189803	-0.42
	189804	0.21
	189805	-0.39
	189806	0.29
	189807	-0.36
	189808	0.43
	189809	0.29
	189810	0.27
	189811	0.55
	189812	0.6
	189901	0.08
	189902	-1.27
	189903	-0.75
	189904	-0.51
	189905	-1.07
	189906	-1.48
	189907	-0.14
	189908	0.32
	189909	0.35
	189910	-0.37
	189911	0.3
	189912	0.32
	190001	0.81
	190002	0.2
	190003	0.61
	190004	1.85
	190005	1.49
	190006	1.23
	190007	1.07
	190008	1.15
	190009	-0.4
	190010	0.08
	190011	0.57
	190012	1.02
	190101	1.13
	190102	0.65
	190103	-0.33
	190104	-0.45
	190105	-0.99
	190106	-0.84
	190107	-1.33
	190108	-0.73
	190109	-0.07
	190110	0.25
	190111	-0.08
	190112	0.56
	190201	1.37
	190202	0.53
	190203	0.4
	190204	0.64
	190205	1.36
	190206	2.33
	190207	3.04
	190208	1.81
	190209	0.89
	190210	1.11
	190211	0.74
	190212	0.44
	190301	-0.04
	190302	0.1
	190303	-0.19
	190304	-1.08
	190305	-0.37
	190306	0.04
	190307	1.49
	190308	1.35
	190309	0.54
	190310	0.72
	190311	0.22
	190312	0.6
	190401	1.41
	190402	0.54
	190403	0.72
	190404	0.07
	190405	0.47
	190406	-0.07
	190407	0.05
	190408	1.64
	190409	2.24
	190410	1.8
	190411	1.93
	190412	3.12
	190501	2.75
	190502	1.71
	190503	1.04
	190504	2.05
	190505	1.31
	190506	1.56
	190507	2.31
	190508	2.41
	190509	2.1
	190510	-0.41
	190511	0.74
	190512	-0.98
	190601	1.36
	190602	1.26
	190603	0.5
	190604	0.43
	190605	1.45
	190606	0.93
	190607	1.35
	190608	0.94
	190609	0.11
	190610	0.94
	190611	0.89
	190612	-0.43
	190701	-0.68
	190702	-0.36
	190703	-1.88
	190704	-1.58
	190705	0.23
	190706	0.96
	190707	0.59
	190708	-0.31
	190709	0.78
	190710	1.84
	190711	1.77
	190712	1.94
	190801	1.72
	190802	1.67
	190803	0.51
	190804	-0.08
	190805	0.16
	190806	0.21
	190807	0.42
	190808	-0.72
	190809	0.71
	190810	0.94
	190811	1.88
	190812	1.34
	190901	0.69
	190902	0.86
	190903	0.93
	190904	0.28
	190905	-0.17
	190906	-0.65
	190907	-1.39
	190908	-2.3
	190909	-1.97
	190910	-1.25
	190911	-1.36
	190912	-2.21
	191001	-1.71
	191002	-1.23
	191003	-0.9
	191004	-1.97
	191005	-2.33
	191006	-0.35
	191007	-0.08
	191008	-0.73
	191009	0.73
	191010	-0.96
	191011	-0.59
	191012	0.39
	191101	-0.3
	191102	-1.21
	191103	-1.26
	191104	-0.56
	191105	-0.71
	191106	-1.51
	191107	-0.38
	191108	0.08
	191109	-0.26
	191110	-0.12
	191111	-0.38
	191112	-0.97
	191201	-0.21
	191202	-0.02
	191203	-0.44
	191204	-0.51
	191205	-0.04
	191206	0.45
	191207	0.26
	191208	0.34
	191209	1.23
	191210	0.82
	191211	0.05
	191212	0.06
	191301	-0.25
	191302	0.11
	191303	-0.23
	191304	-0.85
	191305	0.1
	191306	0.32
	191307	0.9
	191308	1.12
	191309	0.76
	191310	0.4
	191311	0.44
	191312	0.11
	191401	-0.28
	191402	-0.3
	191403	0.04
	191404	0.82
	191405	0.47
	191406	-0.83
	191407	-1.01
	191408	-0.97
	191409	-1.17
	191410	-0.74
	191411	-0.35
	191412	-0.07
	191501	-0.42
	191502	-0.53
	191503	0.35
	191504	1.26
	191505	1.54
	191506	1.53
	191507	1.24
	191508	0.5
	191509	-0.08
	191510	-1.51
	191511	-1.45
	191512	-0.82
	191601	-1.56
	191602	-1.55
	191603	-1.3
	191604	-0.59
	191605	-0.49
	191606	-1.69
	191607	-1.68
	191608	-2.24
	191609	-2.05
	191610	-1.82
	191611	-2.48
	191612	-2.44
	191701	-1.71
	191702	-1.73
	191703	-1.94
	191704	-1.78
	191705	-1.19
	191706	-1.06
	191707	-0.9
	191708	-0.75
	191709	-1.15
	191710	-1.42
	191711	-0.74
	191712	-0.52
	191801	0.42
	191802	-0.13
	191803	-0.94
	191804	-0.85
	191805	-1.07
	191806	-0.57
	191807	0
	191808	0.22
	191809	0.41
	191810	1.31
	191811	1.33
	191812	0.55
	191901	0.47
	191902	-0.05
	191903	-0.64
	191904	-0.63
	191905	-1.05
	191906	-1.53
	191907	-1.87
	191908	-0.92
	191909	-0.31
	191910	-0.6
	191911	-0.77
	191912	-0.39
	192001	-1.08
	192002	-0.77
	192003	-0.9
	192004	-1.33
	192005	-1.24
	192006	-1.28
	192007	-1.59
	192008	-2.26
	192009	-2.19
	192010	-1.79
	192011	-0.8
	192012	-0.69
	192101	-1.09
	192102	-1.55
	192103	-0.85
	192104	-1.63
	192105	-1.5
	192106	-1.05
	192107	-1.58
	192108	-2.01
	192109	-1.5
	192110	-1.58
	192111	-0.81
	192112	0
	192201	0.07
	192202	-1.26
	192203	-1.63
	192204	-1.81
	192205	-1.89
	192206	-1.27
	192207	-0.74
	192208	-0.56
	192209	-0.49
	192210	-0.27
	192211	-0.74
	192212	0.46
	192301	0.24
	192302	-0.75
	192303	-1.01
	192304	-0.51
	192305	0.18
	192306	-0.98
	192307	0.6
	192308	0.21
	192309	-0.25
	192310	0.26
	192311	-0.26
	192312	-0.22
	192401	-0.7
	192402	-0.67
	192403	-0.47
	192404	-1.23
	192405	-0.53
	192406	-0.39
	192407	-1.01
	192408	-1.41
	192409	-1.73
	192410	-2.13
	192411	-1.4
	192412	-0.27
	192501	-0.93
	192502	-0.62
	192503	-0.65
	192504	-1.14
	192505	-0.51
	192506	-1.03
	192507	-0.69
	192508	-0.72
	192509	0.09
	192510	0.26
	192511	0.94
	192512	0.72
	192601	1.12
	192602	1.26
	192603	1.23
	192604	1.81
	192605	2.29
	192606	1.63
	192607	2.14
	192608	1.7
	192609	1.62
	192610	1.79
	192611	2.55
	192612	2.11
	192701	0.91
	192702	1.33
	192703	0.89
	192704	-0.03
	192705	-0.12
	192706	0.56
	192707	-0.28
	192708	-0.76
	192709	0.03
	192710	-0.63
	192711	-0.24
	192712	-0.08
	192801	0.45
	192802	0.75
	192803	0.88
	192804	0.42
	192805	0.48
	192806	0.96
	192807	-0.68
	192808	-0.86
	192809	-1.79
	192810	-1.05
	192811	0.09
	192812	0.6
	192901	0.83
	192902	0.24
	192903	0.04
	192904	0.23
	192905	0.48
	192906	0.6
	192907	0.03
	192908	-0.12
	192909	1.01
	192910	1.02
	192911	0.64
	192912	1.55
	193001	1.29
	193002	0.77
	193003	0.3
	193004	0.19
	193005	0.1
	193006	0.02
	193007	0
	193008	-0.2
	193009	0.33
	193010	0.01
	193011	-0.02
	193012	0.84
	193101	1.25
	193102	1.18
	193103	1.14
	193104	1.61
	193105	2
	193106	1.76
	193107	2.08
	193108	0.74
	193109	0.85
	193110	0.09
	193111	-0.21
	193112	-0.84
	193201	-1.22
	193202	-1.63
	193203	-0.65
	193204	0.49
	193205	-0.03
	193206	-0.15
	193207	-0.23
	193208	-0.29
	193209	-1.14
	193210	-0.02
	193211	-0.32
	193212	0.16
	193301	-0.7
	193302	-1.08
	193303	-1.05
	193304	-0.84
	193305	-1.83
	193306	-2.36
	193307	-3.32
	193308	-2.92
	193309	-2.97
	193310	-1.83
	193311	-0.49
	193312	-0.66
	193401	-0.41
	193402	0.1
	193403	0.88
	193404	1.26
	193405	0.79
	193406	-0.27
	193407	0.18
	193408	1.23
	193409	1.13
	193410	1.91
	193411	1.64
	193412	1.51
	193501	0.72
	193502	0.11
	193503	-0.26
	193504	0.1
	193505	0.73
	193506	1.23
	193507	0.62
	193508	0.35
	193509	0.42
	193510	0.4
	193511	0.23
	193512	1.53
	193601	2.17
	193602	1.6
	193603	1.19
	193604	1.19
	193605	1.64
	193606	2.24
	193607	2.79
	193608	1.95
	193609	0.98
	193610	2.15
	193611	2.83
	193612	1.52
	193701	0.06
	193702	-0.45
	193703	-0.28
	193704	-0.69
	193705	-0.39
	193706	1.16
	193707	-0.32
	193708	-0.98
	193709	0.01
	193710	0.52
	193711	0.97
	193712	1.06
	193801	1.53
	193802	0.28
	193803	-0.45
	193804	-0.22
	193805	-0.59
	193806	-0.62
	193807	-0.63
	193808	-0.57
	193809	-0.26
	193810	0.78
	193811	0.04
	193812	1.14
	193901	1.17
	193902	-0.1
	193903	-0.63
	193904	0.03
	193905	0.12
	193906	-0.07
	193907	-1.1
	193908	-1.31
	193909	-1.54
	193910	-1.49
	193911	-0.9
	193912	1.44
	194001	1.82
	194002	1.55
	194003	1.87
	194004	2.06
	194005	1.76
	194006	2.07
	194007	1.82
	194008	1.31
	194009	1.09
	194010	1.28
	194011	1.55
	194012	2.68
	194101	2.67
	194102	2.86
	194103	2.43
	194104	2.31
	194105	2.07
	194106	2.83
	194107	3.01
	194108	3.22
	194109	2.04
	194110	1.14
	194111	1.51
	194112	2.21
	194201	2.48
	194202	1.96
	194203	1.11
	194204	0.97
	194205	0.53
	194206	0.77
	194207	0.58
	194208	0.6
	194209	0.37
	194210	0.23
	194211	-0.13
	194212	-0.93
	194301	-1.62
	194302	-0.7
	194303	0.32
	194304	1.28
	194305	0.58
	194306	-0.14
	194307	-0.22
	194308	-1.88
	194309	-1.61
	194310	-1.48
	194311	-0.18
	194312	1.98
	194401	1.58
	194402	0.25
	194403	-0.53
	194404	-0.87
	194405	-1.76
	194406	-2.1
	194407	-1.49
	194408	-1
	194409	-1.94
	194410	-1.5
	194411	-0.81
	194412	-0.48
	194501	-0.09
	194502	-0.34
	194503	-0.06
	194504	-0.37
	194505	-0.38
	194506	0.16
	194507	0.31
	194508	-0.61
	194509	-0.57
	194510	-0.42
	194511	-1.34
	194512	-1.99
	194601	-1.1
	194602	0.67
	194603	0.73
	194604	0.67
	194605	-0.45
	194606	-0.63
	194607	-0.07
	194608	-0.17
	194609	-0.15
	194610	-1.23
	194611	-1.82
	194612	-1.66
	194701	-0.15
	194702	0.22
	194703	0.31
	194704	0.1
	194705	-0.36
	194706	0.67
	194707	0.78
	194708	0.61
	194709	0.4
	194710	1.39
	194711	0.61
	194712	0.43
	194801	0.27
	194802	-0.32
	194803	-1.11
	194804	-1.13
	194805	-1.78
	194806	0.01
	194807	-0.1
	194808	-1.07
	194809	-1.07
	194810	-1.74
	194811	-0.92
	194812	-1.85
	194901	-2.82
	194902	-3.17
	194903	-1.82
	194904	-1.54
	194905	-1.37
	194906	-1.21
	194907	-1.48
	194908	-1.61
	194909	-1.6
	194910	-2.29
	194911	-1.08
	194912	-0.93
	195001	-1.61
	195002	-2.17
	195003	-1.89
	195004	-1.99
	195005	-3.19
	195006	-2.52
	195007	-3.65
	195008	-2.98
	195009	-2.4
	195010	-1.92
	195011	-1.45
	195012	-1.06
	195101	-1.19
	195102	-1.52
	195103	-1.72
	195104	-1.35
	195105	-1.29
	195106	-1.77
	195107	-0.23
	195108	-1.76
	195109	-0.78
	195110	-0.09
	195111	-0.31
	195112	-1.45
	195201	-2.19
	195202	-1.35
	195203	-1.67
	195204	-1.92
	195205	-2.07
	195206	-2.13
	195207	-2.05
	195208	-1.58
	195209	-1.36
	195210	-0.91
	195211	-0.53
	195212	-0.83
	195301	-0.16
	195302	-0.46
	195303	-1.27
	195304	-0.9
	195305	-0.55
	195306	-0.2
	195307	0.06
	195308	-0.92
	195309	-1.11
	195310	-1.48
	195311	-0.51
	195312	-0.18
	195401	-1.13
	195402	-0.95
	195403	-1.15
	195404	-1.25
	195405	-0.76
	195406	0.49
	195407	-0.08
	195408	-0.32
	195409	-1.05
	195410	0.02
	195411	0.85
	195412	0.49
	195501	-0.23
	195502	-1.01
	195503	-1.24
	195504	-2.21
	195505	-1.89
	195506	-2.18
	195507	-2.75
	195508	-2.66
	195509	-2.48
	195510	-3.35
	195511	-2.63
	195512	-2.2
	195601	-2.26
	195602	-2.28
	195603	-2.93
	195604	-2.55
	195605	-1.62
	195606	-1.98
	195607	-1.48
	195608	-1
	195609	-0.28
	195610	-1.66
	195611	-2.44
	195612	-1.27
	195701	-1.31
	195702	-1.57
	195703	-0.83
	195704	-0.81
	195705	-0.02
	195706	1.53
	195707	0.59
	195708	0.34
	195709	1.84
	195710	1.72
	195711	1.54
	195712	0.46
	195801	0.83
	195802	0.94
	195803	0.62
	195804	0.56
	195805	1.46
	195806	1.82
	195807	0.61
	195808	1.06
	195809	0.77
	195810	0.28
	195811	0.28
	195812	1.14
	195901	1.04
	195902	0.35
	195903	-0.14
	195904	-0.16
	195905	-0.13
	195906	0.23
	195907	-0.42
	195908	-0.31
	195909	-0.53
	195910	0.96
	195911	1.38
	195912	1.02
	196001	0.24
	196002	0.61
	196003	0.23
	196004	0.21
	196005	0.35
	196006	1.2
	196007	-0.42
	196008	-0.31
	196009	-0.96
	196010	-0.34
	196011	-0.34
	196012	0
	196101	0.89
	196102	0.92
	196103	0.64
	196104	0.28
	196105	-0.54
	196106	-0.7
	196107	-1.23
	196108	-0.87
	196109	-1.34
	196110	-1.78
	196111	-1.43
	196112	-1.73
	196201	-1
	196202	-0.87
	196203	-1.06
	196204	-0.95
	196205	-1.3
	196206	-1.71
	196207	-1.83
	196208	-0.66
	196209	-1.47
	196210	-1.76
	196211	-0.38
	196212	-0.23
	196301	0.12
	196302	0.15
	196303	-0.28
	196304	-0.27
	196305	-1.26
	196306	-0.6
	196307	-1.11
	196308	-1.01
	196309	1.08
	196310	0.34
	196311	-0.5
	196312	0.45
	196401	0.34
	196402	0.21
	196403	-0.71
	196404	-1.27
	196405	-2.39
	196406	-0.86
	196407	-1.08
	196408	-1.6
	196409	-1.35
	196410	-0.64
	196411	-0.68
	196412	-0.62
	196501	-0.95
	196502	-0.61
	196503	-0.17
	196504	-0.01
	196505	-0.66
	196506	-0.76
	196507	-0.74
	196508	0.32
	196509	0.83
	196510	0.3
	196511	0.47
	196512	0.25
	196601	-0.67
	196602	-0.43
	196603	-1
	196604	-0.37
	196605	-0.76
	196606	0.1
	196607	0.01
	196608	-0.29
	196609	-0.35
	196610	-0.6
	196611	-0.71
	196612	-0.21
	196701	-0.24
	196702	-0.25
	196703	-0.8
	196704	-1.13
	196705	-1.54
	196706	-1.2
	196707	-1.21
	196708	-1.55
	196709	-0.6
	196710	-0.06
	196711	0.36
	196712	-0.68				1967	-0.741667		1967	-0.741667
	196801	-0.65							1968	-0.154167
	196802	-0.19							1969	-0.344167
	196803	0.08							1970	-0.404167
	196804	-0.69							1971	-1.31583
	196805	-0.79							1972	-1.14417
	196806	0.14							1973	-1.13667
	196807	0.44							1974	-0.3025
	196808	-0.01							1975	-1.41167
	196809	0.26							1976	-0.149167
	196810	-0.18							1977	0.045
	196811	0.03							1978	0.0716667
	196812	-0.29				1968	-0.154167		1979	0.1075
	196901	-0.71							1980	0.308333
	196902	-1.22							1981	0.838333
	196903	-1.21							1982	-0.2575
	196904	-1.07							1983	1.24833
	196905	-1.06							1984	0.603333
	196906	0.84							1985	0.0266667
	196907	-0.37							1986	1.0075
	196908	-0.92							1987	1.13667
	196909	-1.07							1988	-0.0383333
	196910	0.95							1989	-0.504167
	196911	0.58							1990	-0.826667
	196912	1.13				1969	-0.344167		1991	-0.879167
	197001	1.06							1992	0.76
	197002	1.01							1993	1.04333
	197003	1.2							1994	-0.493333
	197004	0.31							1995	0.439167
	197005	-0.89							1996	0.683333
	197006	-0.12							1997	1.31667
	197007	-0.92							1998	-0.478333
	197008	-1.79							1999	-1.84333
	197009	-1.68							2000	-1.12583
	197010	-1.2							2001	-1.13417
	197011	-0.92							2002	-0.439167
	197012	-0.91				1970	-0.404167		2003	0.381667
	197101	-1.34							2004	-0.224167
	197102	-1.45							2005	-0.188333
	197103	-1.55							2006	-0.350833
	197104	-1.7							2007	-0.7025
	197105	-1.75							2008	-1.66333
	197106	-1.86							2009	-1.03167
	197107	-2.25							2010	-1.06083
	197108	-0.32							2011	-1.81167
	197109	-0.17							2012	-1.73333
	197110	-0.35							2013	-1.16583
	197111	-1.28							2014	0.549167
	197112	-1.77				1971	-1.31583		2015	0.92
	197201	-2.12							2016	0.6725
	197202	-1.95							2017	-0.0933333
	197203	-1.53							2018	-0.3625
	197204	-1.7							2019	-0.145833
	197205	-2.16							2020	-1.13667
	197206	-1.84
	197207	-1.48
	197208	-0.11
	197209	-0.2
	197210	-0.22
	197211	-0.05
	197212	-0.37				1972	-1.14417
	197301	-0.15
	197302	-0.55
	197303	-0.88
	197304	-1.35
	197305	-1.59
	197306	-1.44
	197307	-1.4
	197308	-1.56
	197309	-1.05
	197310	-1.36
	197311	-1.42
	197312	-0.89				1973	-1.13667
	197401	-0.86
	197402	-1.38
	197403	-1.21
	197404	-0.62
	197405	-0.72
	197406	-0.37
	197407	0.02
	197408	-0.27
	197409	0.71
	197410	0.19
	197411	0.61
	197412	0.27				1974	-0.3025
	197501	-0.65
	197502	-0.93
	197503	-1.07
	197504	-1.79
	197505	-2.08
	197506	-1.61
	197507	-0.84
	197508	-1.56
	197509	-1.6
	197510	-1.59
	197511	-1.73
	197512	-1.49				1975	-1.41167
	197601	-1.08
	197602	-1.01
	197603	-1.31
	197604	-1.38
	197605	-1.23
	197606	-1.26
	197607	0.28
	197608	0.97
	197609	0.58
	197610	1.12
	197611	1.33
	197612	1.2				1976	-0.149167
	197701	1.24
	197702	1.51
	197703	0.62
	197704	-0.25
	197705	-0.47
	197706	0.03
	197707	-0.06
	197708	-0.09
	197709	-0.64
	197710	-0.84
	197711	-0.45
	197712	-0.06				1977	0.045
	197801	0.58
	197802	0.78
	197803	1.13
	197804	1.03
	197805	0.77
	197806	0.33
	197807	-1.62
	197808	-0.91
	197809	-0.78
	197810	0.07
	197811	-0.01
	197812	-0.51				1978	0.0716667
	197901	-0.38
	197902	-1.29
	197903	-0.68
	197904	-0.12
	197905	0.57
	197906	0.22
	197907	0.3
	197908	0.05
	197909	0.88
	197910	1.1
	197911	0.58
	197912	0.06				1979	0.1075
	198001	0.06
	198002	0.58
	198003	0.62
	198004	0.78
	198005	0.64
	198006	-0.72
	198007	-0.21
	198008	0.08
	198009	-0.13
	198010	0.99
	198011	0.71
	198012	0.3				1980	0.308333
	198101	1.18
	198102	1.24
	198103	1.22
	198104	1.07
	198105	1.29
	198106	1.82
	198107	0.82
	198108	-0.05
	198109	0.43
	198110	-0.09
	198111	0.54
	198112	0.59				1981	0.838333
	198201	0.11
	198202	-0.19
	198203	-0.37
	198204	-0.7
	198205	-1.21
	198206	-0.99
	198207	0.12
	198208	-0.08
	198209	0.51
	198210	0.15
	198211	-0.6
	198212	0.16				1982	-0.2575
	198301	0.4
	198302	0.97
	198303	1.73
	198304	1.26
	198305	1.01
	198306	1.9
	198307	2.47
	198308	1.18
	198309	0.47
	198310	0.68
	198311	1.19
	198312	1.72				1983	1.24833
	198401	1.42
	198402	1.23
	198403	1.56
	198404	1
	198405	0.87
	198406	-0.13
	198407	-0.35
	198408	0.01
	198409	0.18
	198410	0.43
	198411	0.54
	198412	0.48				1984	0.603333
	198501	0.87
	198502	0.48
	198503	-0.34
	198504	-0.52
	198505	-0.87
	198506	0.04
	198507	0.52
	198508	0.19
	198509	0.13
	198510	0.14
	198511	-0.65
	198512	0.33				1985	0.0266667
	198601	1.04
	198602	1.47
	198603	1.68
	198604	1.21
	198605	0.85
	198606	0.62
	198607	1.05
	198608	-0.19
	198609	-0.03
	198610	1
	198611	1.68
	198612	1.71				1986	1.0075
	198701	1.47
	198702	1.46
	198703	1.35
	198704	1.38
	198705	0.82
	198706	0.05
	198707	1.38
	198708	1.74
	198709	1.44
	198710	0.68
	198711	0.93
	198712	0.94				1987	1.13667
	198801	0.23
	198802	0.47
	198803	0.49
	198804	0.34
	198805	0.37
	198806	0.21
	198807	-0.15
	198808	-0.88
	198809	-0.98
	198810	-0.36
	198811	-0.06
	198812	-0.14				1988	-0.0383333
	198901	-1.24
	198902	-1.45
	198903	-1.24
	198904	-0.32
	198905	-0.09
	198906	0.11
	198907	0.56
	198908	-0.44
	198909	-0.57
	198910	-0.51
	198911	-0.76
	198912	-0.1				1989	-0.504167
	199001	-0.42
	199002	-1.28
	199003	-1.24
	199004	-0.15
	199005	-0.32
	199006	-0.25
	199007	-0.31
	199008	-0.43
	199009	-0.26
	199010	-1.16
	199011	-1.88
	199012	-2.22				1990	-0.826667
	199101	-1.8
	199102	-1.09
	199103	-1.11
	199104	-1.63
	199105	-1.65
	199106	-2.25
	199107	-1.57
	199108	-0.58
	199109	0.37
	199110	0.41
	199111	0.56
	199112	-0.21				1991	-0.879167
	199201	0.08
	199202	0.17
	199203	0.12
	199204	0.55
	199205	1.26
	199206	1.22
	199207	1.5
	199208	0.85
	199209	0.45
	199210	1.28
	199211	1.31
	199212	0.33				1992	0.76
	199301	-0.28
	199302	0.02
	199303	0.24
	199304	1
	199305	1.79
	199306	2.05
	199307	1.48
	199308	1.96
	199309	1.15
	199310	1.31
	199311	1.13
	199312	0.67				1993	1.04333
	199401	0.85
	199402	0.33
	199403	0.27
	199404	0.49
	199405	0.55
	199406	0.1
	199407	-0.91
	199408	-0.88
	199409	-1.51
	199410	-1.06
	199411	-1.93
	199412	-2.22				1994	-0.493333
	199501	-0.86
	199502	0.02
	199503	0.46
	199504	0.49
	199505	0.89
	199506	1.03
	199507	1
	199508	-0.11
	199509	1.22
	199510	0.64
	199511	0.05
	199512	0.44				1995	0.439167
	199601	1.01
	199602	1.01
	199603	0.85
	199604	1.37
	199605	2.13
	199606	1.1
	199607	0.57
	199608	-0.66
	199609	0.07
	199610	0.4
	199611	0.38
	199612	-0.03				1996	0.683333
	199701	0.44
	199702	0.29
	199703	0.39
	199704	0.73
	199705	1.59
	199706	2.55
	199707	1.49
	199708	2.27
	199709	1.8
	199710	1.78
	199711	1.48
	199712	0.99				1997	1.31667
	199801	1.05
	199802	1.52
	199803	1.29
	199804	0.03
	199805	-0.83
	199806	-0.78
	199807	-1.16
	199808	-0.87
	199809	-1.7
	199810	-2.23
	199811	-0.97
	199812	-1.09				1998	-0.478333
	199901	-0.78
	199902	-1.06
	199903	-1.18
	199904	-1.85
	199905	-2.32
	199906	-2.34
	199907	-1.87
	199908	-1.84
	199909	-2.24
	199910	-2.54
	199911	-2.18
	199912	-1.92				1999	-1.84333
	200001	-2.2
	200002	-1.28
	200003	-0.66
	200004	-0.63
	200005	-0.81
	200006	-0.64
	200007	-1.51
	200008	-1.68
	200009	-1.45
	200010	-1.61
	200011	-1.04
	200012	0				2000	-1.12583
	200101	0.48
	200102	-0.01
	200103	-0.41
	200104	-1.18
	200105	-1.12
	200106	-1.22
	200107	-2.21
	200108	-1.68
	200109	-1.98
	200110	-1.91
	200111	-1.25
	200112	-1.12				2001	-1.13417
	200201	-0.42
	200202	-1.51
	200203	-1.27
	200204	-1.23
	200205	-1.3
	200206	-1.18
	200207	-0.71
	200208	0.11
	200209	-0.21
	200210	-0.2
	200211	1.08
	200212	1.57				2002	-0.439167
	200301	1.45
	200302	1.23
	200303	1.01
	200304	0.36
	200305	0.21
	200306	-0.42
	200307	0.37
	200308	0.63
	200309	-0.17
	200310	0.74
	200311	-0.23
	200312	-0.6				2003	0.381667
	200401	-0.55
	200402	-0.21
	200403	-0.15
	200404	0
	200405	0.61
	200406	-0.11
	200407	0.04
	200408	0.24
	200409	0.02
	200410	-0.72
	200411	-1.22
	200412	-0.64				2004	-0.224167
	200501	-0.15
	200502	-0.01
	200503	0.7
	200504	0.28
	200505	1.36
	200506	0.85
	200507	0.11
	200508	-0.42
	200509	-0.99
	200510	-2
	200511	-1.89
	200512	-0.1				2005	-0.188333
	200601	0.54
	200602	0.38
	200603	-0.74
	200604	-0.54
	200605	-0.37
	200606	0.21
	200607	0.39
	200608	-0.85
	200609	-1.54
	200610	-0.46
	200611	-0.81
	200612	-0.42				2006	-0.350833
	200701	-0.69
	200702	-0.71
	200703	-1.1
	200704	-0.46
	200705	-0.29
	200706	-0.07
	200707	0.43
	200708	0.09
	200709	-0.97
	200710	-2.33
	200711	-1.46
	200712	-0.87				2007	-0.7025
	200801	-1.5
	200802	-1.46
	200803	-1.26
	200804	-1.79
	200805	-1.62
	200806	-1.85
	200807	-1.96
	200808	-1.85
	200809	-1.87
	200810	-1.9
	200811	-1.59
	200812	-1.31				2008	-1.66333
	200901	-1.81
	200902	-1.78
	200903	-2.06
	200904	-2.23
	200905	-1.32
	200906	-0.73
	200907	-0.71
	200908	-0.49
	200909	0.33
	200910	-0.13
	200911	-0.94
	200912	-0.51				2009	-1.03167
	201001	0.05
	201002	0.25
	201003	-0.16
	201004	-0.04
	201005	-0.18
	201006	-0.79
	201007	-1.99
	201008	-2.21
	201009	-2.45
	201010	-1.6
	201011	-1.57
	201012	-2.04				2010	-1.06083
	201101	-1.8
	201102	-1.46
	201103	-1.28
	201104	-1.02
	201105	-0.66
	201106	-1.08
	201107	-2.3
	201108	-2.37
	201109	-2.5
	201110	-1.92
	201111	-2.95
	201112	-2.4				2011	-1.81167
	201201	-1.85
	201202	-1.35
	201203	-1.66
	201204	-1.01
	201205	-2.12
	201206	-1.63
	201207	-2.4
	201208	-2.6
	201209	-2.99
	201210	-1.22
	201211	-0.66
	201212	-1.31				2012	-1.73333
	201301	-1.1
	201302	-1.42
	201303	-1.48
	201304	-0.72
	201305	-0.4
	201306	-1.19
	201307	-1.34
	201308	-1.56
	201309	-1
	201310	-1.65
	201311	-1.09
	201312	-1.04				2013	-1.16583
	201401	-0.56
	201402	-0.42
	201403	0.3
	201404	0.36
	201405	1.26
	201406	-0.29
	201407	0.24
	201408	0.33
	201409	0.75
	201410	1.42
	201411	1.35
	201412	1.85				2014	0.549167
	201501	1.51
	201502	1.52
	201503	1.34
	201504	0.9
	201505	0.33
	201506	0.82
	201507	1.41
	201508	0.98
	201509	0.96
	201510	0.83
	201511	0.16
	201512	0.28				2015	0.92
	201601	0.74
	201602	1.3
	201603	1.58
	201604	1.73
	201605	1.59
	201606	0.85
	201607	0.56
	201608	-0.61
	201609	-0.8
	201610	-0.43
	201611	0.96
	201612	0.6				2016	0.6725
	201701	-0.05
	201702	-0.01
	201703	0.1
	201704	0.57
	201705	0.45
	201706	0.35
	201707	-0.43
	201708	-0.62
	201709	-0.18
	201710	-0.68
	201711	-0.59
	201712	-0.03				2017	-0.0933333
	201801	0.4
	201802	-0.08
	201803	-0.71
	201804	-0.81
	201805	-0.45
	201806	-0.65
	201807	-0.01
	201808	-0.21
	201809	-0.35
	201810	-0.57
	201811	-0.7
	201812	-0.21				2018	-0.3625
	201901	-0.33
	201902	-0.72
	201903	-0.33
	201904	0.1
	201905	0.27
	201906	-0.05
	201907	0.55
	201908	0.01
	201909	0.13
	201910	-0.89
	201911	-0.49
	201912	0				2019	-0.145833
	202001	-1.41
	202002	-1.47
	202003	-1.75
	202004	-1.31
	202005	-0.51
[truncated: 7 more rows]

## Sheet: SOImon
	Southern Oscillation Index (SOI)
	https://www.ncdc.noaa.gov/teleconnections/enso/indicators/soi/
	Date	Value
	195101	1.5
	195102	0.9
	195103	-0.1
	195104	-0.3
	195105	-0.7
	195106	0.2
	195107	-1
	195108	-0.2
	195109	-1.1
	195110	-1
	195111	-0.8
	195112	-0.7
	195201	-0.9
	195202	-0.6
	195203	0.5
	195204	-0.2
	195205	0.8
	195206	0.7
	195207	0.5
	195208	0.1
	195209	-0.2
	195210	0.4
	195211	0
	195212	-1.2
	195301	0.3
	195302	-0.5
	195303	-0.2
	195304	0.2
	195305	-1.7
	195306	0.1
	195307	0
	195308	-1.2
	195309	-1.2
	195310	0.1
	195311	-0.3
	195312	-0.5
	195401	0.7
	195402	-0.3
	195403	0.3
	195404	0.6
	195405	0.5
	195406	0.1
	195407	0.4
	195408	1.1
	195409	0.2
	195410	0.3
	195411	0.1
	195412	1.4
	195501	-0.5
	195502	1.9
	195503	0.6
	195504	-0.1
	195505	1
	195506	1.3
	195507	1.6
	195508	1.5
	195509	1.3
	195510	1.5
	195511	1.2
	195512	1
	195601	1.3
	195602	1.6
	195603	1.3
	195604	0.9
	195605	1.4
	195606	1.1
	195607	1.1
	195608	1.2
	195609	0.1
	195610	1.8
	195611	0.2
	195612	1.1
	195701	0.6
	195702	-0.1
	195703	0.2
	195704	0.2
	195705	-0.7
	195706	0.2
	195707	0.2
	195708	-0.5
	195709	-0.9
	195710	0
	195711	-1
	195712	-0.3
	195801	-1.9
	195802	-0.5
	195803	0.3
	195804	0.4
	195805	-0.5
	195806	0.3
	195807	0.4
	195808	0.9
	195809	-0.3
	195810	0.1
	195811	-0.4
	195812	-0.6
	195901	-0.9
	195902	-1.4
	195903	1.3
	195904	0.4
	195905	0.5
	195906	-0.1
	195907	-0.3
	195908	-0.1
	195909	0
	195910	0.5
	195911	0.9
	195912	0.9
	196001	0.1
	196002	0.1
	196003	1
	196004	0.8
	196005	0.5
	196006	0.1
	196007	0.5
	196008	0.8
	196009	0.7
	196010	0.1
	196011	0.5
	196012	0.8
	196101	-0.3
	196102	0.9
	196103	-1.8
	196104	0.8
	196105	0.3
	196106	0.1
	196107	0.2
	196108	0.2
	196109	0.1
	196110	-0.3
	196111	0.5
	196112	1.5
	196201	2
	196202	-0.3
	196203	0.1
	196204	0.2
	196205	1.1
	196206	0.7
	196207	0.1
	196208	0.6
	196209	0.4
	196210	1
	196211	0.3
	196212	0.2
	196301	1
	196302	0.6
	196303	1.1
	196304	0.8
	196305	0.4
	196306	-0.5
	196307	-0.1
	196308	0
	196309	-0.6
	196310	-1.2
	196311	-0.8
	196312	-1.2
	196401	-0.4
	196402	0
	196403	1.1
	196404	1.1
	196405	0.2
	196406	0.8
	196407	0.6
	196408	1.5
	196409	1.3
	196410	1.3
	196411	0.2
	196412	-0.3
	196501	-0.4
	196502	0.4
	196503	0.8
	196504	-0.5
	196505	0.2
	196506	-0.6
	196507	-1.8
	196508	-0.7
	196509	-1.3
	196510	-0.9
	196511	-1.5
	196512	0.2
	196601	-1.3
	196602	-0.2
	196603	-0.9
	196604	-0.2
	196605	-0.4
	196606	0.3
	196607	0.1
	196608	0.6
	196609	-0.2
	196610	-0.1
	196611	0
	196612	-0.3
	196701	1.7
	196702	1.7
	196703	1.2
	196704	0
	196705	0
	196706	0.6
	196707	0.2
	196708	0.7
	196709	0.5
	196710	0.1
	196711	-0.4
	196712	-0.6				1967	0.475		1967	0.475
	196801	0.5							1968	0.391667
	196802	1.3							1969	-0.35
	196803	0.1							1970	0.475
	196804	0							1971	1.10833
	196805	1.2							1972	-0.483333
	196806	1.1							1973	0.741667
	196807	0.7							1974	1.1
	196808	0.3							1975	1.33333
	196809	-0.3							1976	0.316667
	196810	-0.1							1977	-0.633333
	196811	-0.3							1978	-0.0666667
	196812	0.2				1968	0.391667		1979	0.141667
	196901	-1.5							1980	-0.0666667
	196902	-0.5							1981	0.241667
	196903	0.4							1982	-0.875
	196904	-0.4							1983	-0.758333
	196905	-0.2							1984	0.141667
	196906	0.2							1985	0.283333
	196907	-0.5							1986	-0.0833333
	196908	-0.1							1987	-0.933333
	196909	-1							1988	0.816667
	196910	-0.9							1989	0.708333
	196911	-0.1							1990	-0.116667
	196912	0.4				1969	-0.35		1991	-0.575
	197001	-1.1							1992	-0.825
	197002	-1							1993	-0.65
	197003	0.6							1994	-0.825
	197004	-0.1							1995	-0.0166667
	197005	0.4							1996	0.675
	197006	1							1997	-0.733333
	197007	-0.4							1998	-0.025
	197008	0.6							1999	0.85
	197009	1.2							2000	0.85
	197010	1							2001	0.258333
	197011	1.6							2002	-0.325
	197012	1.9				1970	0.475		2003	-0.0916667
	197101	0.4							2004	-0.258333
	197102	2							2005	-0.183333
	197103	2.3							2006	0.025
	197104	1.7							2007	0.266667
	197105	0.9							2008	1.125
	197106	0.4							2009	0.166667
	197107	0.2							2010	0.908333
	197108	1.5							2011	1.4
	197109	1.4							2012	0.133333
	197110	1.7							2013	0.45
	197111	0.5							2014	-0.133333
	197112	0.3				1971	1.10833		2015	-0.791667
	197201	0.5							2016	-0.191667
	197202	1.1							2017	0.358333
	197203	0.6							2018	0.266667
	197204	-0.1							2019	-0.5
	197205	-1.6							2020	0.466667
	197206	-0.5
	197207	-1.4
	197208	-0.5
	197209	-1.4
	197210	-0.9
	197211	-0.3
	197212	-1.3				1972	-0.483333
	197301	-0.3
	197302	-1.4
	197303	0.7
	197304	0.1
	197305	0.4
	197306	1.1
	197307	0.6
	197308	1.3
	197309	1.2
	197310	0.8
	197311	2.6
	197312	1.8				1973	0.741667
	197401	2.4
	197402	2.1
	197403	2.4
	197404	0.9
	197405	1
	197406	0.4
	197407	1.1
	197408	0.8
	197409	1.1
	197410	0.9
	197411	-0.1
	197412	0.2				1974	1.1
	197501	-0.5
	197502	0.8
	197503	1.6
	197504	1.2
	197505	0.6
	197506	1.3
	197507	1.9
	197508	2
	197509	2.1
	197510	1.7
	197511	1.2
	197512	2.1				1975	1.33333
	197601	1.4
	197602	1.7
	197603	1.7
	197604	0.3
	197605	0.4
	197606	0.3
	197607	-0.9
	197608	-0.8
	197609	-1.1
	197610	0.4
	197611	0.7
	197612	-0.3				1976	0.316667
	197701	-0.4
	197702	1.2
	197703	-0.5
	197704	-0.4
	197705	-0.5
	197706	-0.9
	197707	-1.1
	197708	-0.8
	197709	-0.8
	197710	-1
	197711	-1.3
	197712	-1.1				1977	-0.633333
	197801	-0.3
	197802	-2.7
	197803	-0.2
	197804	-0.3
	197805	1.4
	197806	0.7
	197807	0.6
	197808	0.4
	197809	0.1
	197810	-0.4
	197811	0
	197812	-0.1				1978	-0.0666667
	197901	-0.4
	197902	1
	197903	0.1
	197904	-0.1
	197905	0.5
	197906	0.6
	197907	1.3
	197908	-0.2
	197909	0.1
	197910	-0.1
	197911	-0.4
	197912	-0.7				1979	0.141667
	198001	0.4
	198002	0.3
	198003	-0.4
	198004	-0.6
	198005	0
	198006	0
	198007	0
	198008	0.4
	198009	-0.5
	198010	0
	198011	-0.3
	198012	-0.1				1980	-0.0666667
	198101	0.4
	198102	-0.2
	198103	-1.3
	198104	-0.1
	198105	0.8
	198106	1.2
	198107	0.8
	198108	0.7
	198109	0.3
	198110	-0.4
	198111	0.2
	198112	0.5				1981	0.241667
	198201	1.2
	198202	0.3
	198203	0.6
	198204	0.1
	198205	-0.3
	198206	-1
	198207	-1.5
	198208	-1.7
	198209	-1.7
	198210	-1.7
	198211	-2.6
	198212	-2.2				1982	-0.875
	198301	-3.5
	198302	-3.6
	198303	-2.4
	198304	-0.9
	198305	0.6
	198306	0
	198307	-0.6
	198308	0.1
	198309	0.9
	198310	0.4
	198311	-0.1
	198312	0				1983	-0.758333
	198401	0.2
	198402	0.9
	198403	-0.2
	198404	0.3
	198405	0.2
	198406	-0.3
	198407	0.2
	198408	0.4
	198409	0.1
	198410	-0.3
	198411	0.3
	198412	-0.1				1984	0.141667
	198501	-0.3
	198502	1.2
	198503	0.8
	198504	1.2
	198505	0.4
	198506	-0.4
	198507	-0.1
	198508	1
	198509	0
	198510	-0.4
	198511	-0.2
	198512	0.2				1985	0.283333
	198601	1
	198602	-1
	198603	0.5
	198604	0.3
	198605	-0.2
	198606	1
	198607	0.3
	198608	-0.4
	198609	-0.5
	198610	0.6
	198611	-1.2
	198612	-1.4				1986	-0.0833333
	198701	-0.7
	198702	-1.2
	198703	-1.3
	198704	-1.4
	198705	-1.3
	198706	-1.1
	198707	-1.4
	198708	-0.9
	198709	-1
	198710	-0.4
	198711	0
	198712	-0.5				1987	-0.933333
	198801	-0.1
	198802	-0.4
	198803	0.6
	198804	0.1
	198805	0.9
	198806	0.1
	198807	1
	198808	1.5
	198809	1.8
	198810	1.4
	198811	1.7
	198812	1.2				1988	0.816667
	198901	1.5
	198902	1.2
	198903	1.1
	198904	1.6
	198905	1.2
	198906	0.7
	198907	0.9
	198908	-0.3
	198909	0.5
	198910	0.8
	198911	-0.2
	198912	-0.5				1989	0.708333
	199001	-0.1
	199002	-1.8
	199003	-0.4
	199004	0.2
	199005	1.2
	199006	0.3
	199007	0.5
	199008	-0.2
	199009	-0.7
	199010	0.3
	199011	-0.5
	199012	-0.2				1990	-0.116667
	199101	0.6
	199102	0.3
	199103	-0.7
	199104	-0.6
	199105	-1
	199106	-0.1
	199107	0
	199108	-0.4
	199109	-1.5
	199110	-1
	199111	-0.7
	199112	-1.8				1991	-0.575
	199201	-2.9
	199202	-0.9
	199203	-2
	199204	-1
	199205	0.3
	199206	-0.6
	199207	-0.6
	199208	0.4
	199209	0.1
	199210	-1.4
	199211	-0.7
	199212	-0.6				1992	-0.825
	199301	-0.9
	199302	-0.7
	199303	-0.5
	199304	-1.2
	199305	-0.3
	199306	-0.8
	199307	-0.8
	199308	-0.9
	199309	-0.7
	199310	-1.1
	199311	-0.1
	199312	0.2				1993	-0.65
	199401	-0.1
	199402	0.3
	199403	-0.7
	199404	-1.3
	199405	-0.7
	199406	-0.4
	199407	-1.3
	199408	-1.2
	199409	-1.6
	199410	-1.1
	199411	-0.6
	199412	-1.2				1994	-0.825
	199501	-0.4
	199502	-0.1
	199503	0.8
	199504	-0.7
	199505	-0.4
	199506	0.1
	199507	0.4
	199508	0.3
	199509	0.3
	199510	0
	199511	0
	199512	-0.5				1995	-0.0166667
	199601	1
	199602	0.3
	199603	1.1
	199604	0.8
	199605	0.3
	199606	1.2
	199607	0.7
	199608	0.7
	199609	0.6
	199610	0.6
	199611	-0.1
	199612	0.9				1996	0.675
	199701	0.5
	199702	1.7
	199703	-0.4
	199704	-0.6
	199705	-1.3
	199706	-1.4
	199707	-0.8
	199708	-1.4
	199709	-1.4
	199710	-1.5
	199711	-1.2
	199712	-1				1997	-0.733333
	199801	-2.7
	199802	-2
	199803	-2.4
	199804	-1.4
	199805	0.3
	199806	1
	199807	1.2
	199808	1.2
	199809	1
	199810	1.1
	199811	1
	199812	1.4				1998	-0.025
	199901	1.8
	199902	1
	199903	1.3
	199904	1.4
	199905	0.2
	199906	0.3
	199907	0.5
	199908	0.4
	199909	-0.1
	199910	1
	199911	1
	199912	1.4				1999	0.85
	200001	0.7
	200002	1.7
	200003	1.3
	200004	1.2
	200005	0.4
	200006	-0.2
	200007	-0.2
	200008	0.7
	200009	0.9
	200010	1.1
	200011	1.8
	200012	0.8				2000	0.85
	200101	1
	200102	1.7
	200103	0.9
	200104	0.2
	200105	-0.5
	200106	0.3
	200107	-0.2
	200108	-0.4
	200109	0.2
	200110	0
	200111	0.7
	200112	-0.8				2001	0.258333
	200201	0.4
	200202	1.1
	200203	-0.2
	200204	-0.1
	200205	-0.8
	200206	-0.2
	200207	-0.5
	200208	-1
	200209	-0.6
	200210	-0.4
	200211	-0.5
	200212	-1.1				2002	-0.325
	200301	-0.2
	200302	-0.7
	200303	-0.3
	200304	-0.1
	200305	-0.3
	200306	-0.6
	200307	0.3
	200308	0.1
	200309	-0.1
	200310	0
	200311	-0.3
	200312	1.1				2003	-0.0916667
	200401	-1.3
	200402	1.2
	200403	0.4
	200404	-0.9
	200405	1
	200406	-0.8
	200407	-0.5
	200408	-0.3
	200409	-0.3
	200410	-0.1
	200411	-0.7
	200412	-0.8				2004	-0.258333
	200501	0.3
	200502	-3.1
	200503	0.3
	200504	-0.6
	200505	-0.8
	200506	0.4
	200507	0.2
	200508	-0.3
	200509	0.4
	200510	1.2
	200511	-0.2
	200512	0				2005	-0.183333
	200601	1.7
	200602	0.1
	200603	1.8
	200604	1.1
	200605	-0.5
	200606	-0.2
	200607	-0.6
	200608	-1
	200609	-0.6
	200610	-1.3
	200611	0.1
	200612	-0.3				2006	0.025
	200701	-0.8
	200702	-0.1
	200703	0.2
	200704	-0.1
	200705	-0.1
	200706	0.5
	200707	-0.3
	200708	0.4
	200709	0.2
	200710	0.7
	200711	0.9
	200712	1.7				2007	0.266667
	200801	1.8
	200802	2.6
	200803	1.4
	200804	0.7
	200805	-0.1
	200806	0.6
	200807	0.3
	200808	1
	200809	1.2
	200810	1.3
	200811	1.3
	200812	1.4				2008	1.125
	200901	1.1
	200902	1.9
	200903	0.4
	200904	0.8
	200905	-0.1
	200906	0.1
	200907	0.2
	200908	-0.2
	200909	0.3
	200910	-1.2
	200911	-0.6
	200912	-0.7				2009	0.166667
	201001	-1.1
	201002	-1.5
	201003	-0.7
	201004	1.2
	201005	0.9
	201006	0.4
	201007	1.8
	201008	1.8
	201009	2.2
	201010	1.7
	201011	1.3
	201012	2.9				2010	0.908333
	201101	2.3
	201102	2.7
	201103	2.5
	201104	1.9
	201105	0.4
	201106	0.2
	201107	1
	201108	0.4
	201109	1
	201110	0.8
	201111	1.1
	201112	2.5				2011	1.4
	201201	1.1
	201202	0.5
	201203	0.7
	201204	-0.3
	201205	0
	201206	-0.4
	201207	0
	201208	-0.2
	201209	0.2
	201210	0.3
	201211	0.3
	201212	-0.6				2012	0.133333
	201301	-0.1
	201302	-0.2
	201303	1.5
	201304	0.2
	201305	0.8
	201306	1.2
	201307	0.8
	201308	0.2
	201309	0.3
	201310	-0.1
	201311	0.7
	201312	0.1				2013	0.45
	201401	1.4
	201402	0.1
	201403	-0.9
	201404	0.8
	201405	0.5
	201406	0.2
	201407	-0.2
	201408	-0.7
	201409	-0.7
	201410	-0.6
	201411	-0.9
	201412	-0.6				2014	-0.133333
	201501	-0.8
	201502	0.2
	201503	-0.7
	201504	0
	201505	-0.7
	201506	-0.6
	201507	-1.1
	201508	-1.4
	201509	-1.6
	201510	-1.7
	201511	-0.5
	201512	-0.6				2015	-0.791667
	201601	-2.2
	201602	-2
	201603	-0.1
	201604	-1.2
	201605	0.4
	201606	0.6
	201607	0.4
	201608	0.7
	201609	1.2
	201610	-0.3
	201611	-0.1
	201612	0.3				2016	-0.191667
	201701	0.2
	201702	-0.1
	201703	0.9
	201704	-0.2
	201705	0.3
	201706	-0.4
	201707	0.8
	201708	0.5
	201709	0.6
	201710	0.9
	201711	0.9
	201712	-0.1				2017	0.358333
	201801	1.1
	201802	-0.5
	201803	1.5
	201804	0.5
	201805	0.4
	201806	-0.1
	201807	0.2
	201808	-0.3
	201809	-0.9
	201810	0.4
	201811	-0.1
	201812	1				2018	0.266667
	201901	0
	201902	-1.4
	201903	-0.3
	201904	0.1
	201905	-0.4
	201906	-0.5
	201907	-0.4
	201908	-0.1
	201909	-1.2
	201910	-0.4
	201911	-0.8
	201912	-0.6				2019	-0.5
	202001	0.2
	202002	-0.1
	202003	-0.1
	202004	0.2
	202005	0.4
	202006	-0.4
	202007	0.4
	202008	1.1
	202009	0.9
	202010	0.5
	202011	0.7
	202012	1.8				2020	0.466667

## Sheet: PZIann
	Contiguous U.S., Palmer Z-Index, January-December
	https://www.ncdc.noaa.gov/cag/national/time-series/110/zndx/ann/3/1895-2020?base_prd=true&begbaseyear=1901&endbaseyear=2000
	Date	Value
	1895	-0.11
	1896	0.19
	1897	-0.15
	1898	0.4
	1899	-0.07
	1900	0.06
	1901	-0.87
	1902	0.12
	1903	0.69
	1904	-0.31
	1905	1
	1906	1.58
	1907	1.1
	1908	0.52
	1909	0.59
	1910	-1.72
	1911	-0.56
	1912	0.92
	1913	0.09
	1914	-0.44
	1915	1.45
	1916	0.49
	1917	-0.76
	1918	-1.03
	1919	1.11
	1920	1.07
	1921	-0.56
	1922	-0.31
	1923	0.94
	1924	-0.53
	1925	-0.93
	1926	0.44
	1927	1.03
	1928	0.69
	1929	0.34
	1930	-1.3
	1931	-1.54
	1932	0.2
	1933	-1.12
	1934	-2.6
	1935	-0.01
	1936	-1.76
	1937	-0.22
	1938	-0.09
	1939	-1.69
	1940	-0.8
	1941	1.2
	1942	0.88
	1943	-0.57
	1944	-0.09
	1945	1.31
	1946	0.63
	1947	0.26
	1948	0.38
	1949	0.19
	1950	0.74
	1951	0.8
	1952	-1.06
	1953	-0.9
	1954	-1.56
	1955	-0.99
	1956	-1.61
	1957	0.97
	1958	0.42
	1959	0.28
	1960	-0.05
	1961	0.51
	1962	-0.12
	1963	-1.64
	1964	-0.22
	1965	0.48
	1966	-0.85
	1967	0.38
	1968	0.72
	1969	0.6
	1970	0.24
	1971	0.53
	1972	1.17
	1973	1.64
	1974	0.39
	1975	1.47
	1976	-0.38
	1977	-0.38
	1978	0.21
	1979	1.1
	1980	-0.62
	1981	-0.38
	1982	1.69
	1983	1.58
	1984	1.1
	1985	0.47
	1986	0.72
	1987	-0.55
	1988	-1.59
	1989	-0.07
	1990	0.18
	1991	0.56
	1992	0.76
	1993	1.53
	1994	0.14
	1995	1.05
	1996	1.43
	1997	0.95
	1998	0.68
	1999	-0.71
	2000	-1.42
	2001	-0.77
	2002	-0.56
	2003	0.19
	2004	1.24
	2005	-0.1
	2006	-0.69
	2007	-0.77
	2008	0.36
	2009	1.15
	2010	0.4
	2011	-0.34
	2012	-2
	2013	0.27
	2014	0.38
	2015	0.91
	2016	-0.33
	2017	0.07
	2018	0.69
	2019	1.61
	2020	-0.35
						1967	#DIV/0!		1967	#DIV/0!
						1968	#DIV/0!		1968	#DIV/0!
						1969	#DIV/0!		1969	#DIV/0!
						1970	#DIV/0!		1970	#DIV/0!
						1971	#DIV/0!		1971	#DIV/0!
						1972	#DIV/0!		1972	#DIV/0!
						1973	#DIV/0!		1973	#DIV/0!
						1974	#DIV/0!		1974	#DIV/0!
						1975	#DIV/0!		1975	#DIV/0!
						1976	#DIV/0!		1976	#DIV/0!
						1977	#DIV/0!		1977	#DIV/0!
						1978	#DIV/0!		1978	#DIV/0!
						1979	#DIV/0!		1979	#DIV/0!
						1980	#DIV/0!		1980	#DIV/0!
						1981	#DIV/0!		1981	#DIV/0!
						1982	#DIV/0!		1982	#DIV/0!
						1983	#DIV/0!		1983	#DIV/0!
						1984	#DIV/0!		1984	#DIV/0!
						1985	#DIV/0!		1985	#DIV/0!
						1986	#DIV/0!		1986	#DIV/0!
						1987	#DIV/0!		1987	#DIV/0!
						1988	#DIV/0!		1988	#DIV/0!
						1989	#DIV/0!		1989	#DIV/0!
						1990	#DIV/0!		1990	#DIV/0!
						1991	#DIV/0!		1991	#DIV/0!
						1992	#DIV/0!		1992	#DIV/0!
						1993	#DIV/0!		1993	#DIV/0!
						1994	#DIV/0!		1994	#DIV/0!
						1995	#DIV/0!		1995	#DIV/0!
						1996	#DIV/0!		1996	#DIV/0!
						1997	#DIV/0!		1997	#DIV/0!
						1998	#DIV/0!		1998	#DIV/0!
						1999	#DIV/0!		1999	#DIV/0!
						2000	#DIV/0!		2000	#DIV/0!
						2001	#DIV/0!		2001	#DIV/0!
						2002	#DIV/0!		2002	#DIV/0!
						2003	#DIV/0!		2003	#DIV/0!
						2004	#DIV/0!		2004	#DIV/0!
						2005	#DIV/0!		2005	#DIV/0!
						2006	#DIV/0!		2006	#DIV/0!
						2007	#DIV/0!		2007	#DIV/0!
						2008	#DIV/0!		2008	#DIV/0!
						2009	#DIV/0!		2009	#DIV/0!
						2010	#DIV/0!		2010	#DIV/0!
						2011	#DIV/0!		2011	#DIV/0!
						2012	#DIV/0!		2012	#DIV/0!
						2013	#DIV/0!		2013	#DIV/0!
						2014	#DIV/0!		2014	#DIV/0!
						2015	#DIV/0!		2015	#DIV/0!
						2016	#DIV/0!		2016	#DIV/0!
						2017	#DIV/0!		2017	#DIV/0!
						2018	#DIV/0!		2018	#DIV/0!
						2019	#DIV/0!		2019	#DIV/0!
						2020	#DIV/0!		2020	#DIV/0!

## Sheet: TMXann
	Contiguous U.S. Maximum Temperature, January-December											Units: Degrees Fahrenheit
	https://www.ncdc.noaa.gov/cag/national/time-series/110/tmax/ann/12/1895-2020?base_prd=true&begbaseyear=1901&endbaseyear=2000											Missing: -99
	Date	Value
	189512	62.57
	189612	63.74
	189712	63.4
	189812	63.31
	189912	62.93
	190012	64.59
	190112	63.97
	190212	63.38
	190312	62.49
	190412	63.38
	190512	62.54
	190612	63.32
	190712	63.27
	190812	64.19
	190912	63.33
	191012	64.93
	191112	63.97
	191212	61.97
	191312	63.48
	191412	63.74
	191512	63.05
	191612	63.12
	191712	62.5
	191812	63.93
	191912	63.31
	192012	62.7
	192112	65.96
	192212	64.05
	192312	63.41
	192412	62.92
	192512	64.62
	192612	63.87
	192712	63.91
	192812	63.92
	192912	62.92
	193012	64.19
	193112	65.64
	193212	63.76
	193312	65.41
	193412	66.76
	193512	63.68
	193612	64.6
	193712	63.44
	193812	65.22
	193912	65.91
	194012	63.73
	194112	64.08
	194212	63.85
	194312	64.6
	194412	63.83
	194512	63.69
	194612	65.15
	194712	63.87
	194812	63.84
	194912	64.2
	195012	63.61
	195112	63.19
	195212	64.7
	195312	65.76
	195412	65.78
	195512	63.96
	195612	64.92
	195712	63.47
	195812	63.73
	195912	64.15
	196012	63.43
	196112	63.82
	196212	63.96
	196312	64.65
	196412	63.91
	196512	63.47
	196612	63.64
	196712	63.83
	196812	63.21
	196912	63.19
	197012	63.55
	197112	63.53
	197212	63.08
	197312	63.82
	197412	64.32
	197512	63.23
	197612	64.07
	197712	64.58
	197812	62.77
	197912	62.71
	198012	64.44
	198112	65.07
	198212	62.83
	198312	63.07
	198412	63.59
	198512	63.05
	198612	64.9
	198712	65.34
	198812	65.18
	198912	63.97
	199012	65.63
	199112	64.8
	199212	64.13
	199312	62.68
	199412	64.8
	199512	64.34
	199612	63.71
	199712	63.72
	199812	65.63
	199912	66.2
	200012	65.31
	200112	65.64
	200212	65.19
	200312	65.11
	200412	64.61
	200512	65.49
	200612	66.41
	200712	65.64
	200812	64.45
	200912	64.17
	201012	64.66
	201112	65.16
	201212	67.69
	201312	64.15
	201412	64.34
	201512	66.07
	201612	66.69
	201712	66.35
	201812	65.09
	201912	64.08
	202012	66.33
