# Supplementary material for: Clear anti-phase tendency of volcanic eruptions and consistent U.S. Dollar Index response to volcanic forcing
Source: Research Square preprint supplement (doi:10.21203/rs.3.rs-602091/v1), 2021-07-12
Supplement: Supplementary file 12 [file dx_f_y___Stooq_annual.xlsx]

## Sheet: dx_f_y___Stooq.com
								1967	119.955
								1968	122.058
								1969	122.394
								1970	121.065
								1971	117.457
								1972	109.082
								1973	98.7408
								1974	100.932
								1975	98.77
								1976	105.66
								1977	103.005
								1978	91.6042
								1979	87.9533
								1980	87.7783
								1981	103.825
								1982	116.946
								1983	126.105
								1984	139.234
								1985	140.974
								1986	111.698
								1987	96.3208
								1988	92.9692
								1989	98.3217
								1990	89.1533
								1991	90.3475
								1992	87.4508
								1993	94.0533
								1994	90.8617
								1995	84.0008
								1996	87.205
								1997	96.4717
								1998	98.65
								1999	100.037
								2000	109.704
								2001	115.654
								2002	110.868
								2003	95.3542
								2004	87.1575
								2005	87.4933
								2006	85.9075
								2007	80.3492
								2008	77.09
								2009	80.7342
								2010	81.4867
								2011	76.3858
								2012	80.4283
								2013	81.4508
								2014	83.0292
								2015	96.7375
								2016	97.185
								2017	95.8872
								2018	93.5985
								2019	97.1898
								2020	95.3564
