# Supplementary material for: Clear anti-phase tendency of volcanic eruptions and consistent U.S. Dollar Index response to volcanic forcing
Source: Research Square preprint supplement (doi:10.21203/rs.3.rs-602091/v1), 2021-07-12
Supplement: Supplementary file 14 [file savMXNdata60_Table.xlsx]

## Sheet: listVOL
	Global Volcanism Program - Volcanoes of the World 4.9.4		Downloaded on 13 May 2021 at 06:57 PM
	Volcano Number	Volcano Name	Area of Activity	Start Year	End Year	Latitude	Longitude
	210010	West Eifel Volcanic Field	Strohn, Pulvermaar	-8300		50.17	6.85
	210020	Chaine des Puys	Montcineyre, Estivadoux, Pavin	-4040		45.775	2.97
	210040	Calatrava Volcanic Field	Columba	-3600		38.87	-4.02
	211003	Vulsini		-104		42.6	11.93
	211004	Colli Albani		-114		41.73	12.7
	211010	Campi Flegrei	Monte Nuovo	1538	1538	40.827	14.139
	211020	Vesuvius	Summit and upper flanks	1913	1944	40.821	14.426
	211030	Ischia	Arso	1302	1302	40.73	13.897
	211031	Palinuro		-8040		39.48	14.83
	211040	Stromboli	Summit craters and Sciara del Fuoco	1934	2021	38.789	15.213
	211042	Lipari	Pelato (Forgia Vecchia, Rocche Rossi)	1230		38.49	14.933
	211050	Vulcano		1968		38.404	14.962
	211060	Etna	New Southeast Crater (NSEC)	2013	2021	37.748	14.999
	211070	Campi Flegrei del Mar di Sicilia	Pinne	1911		37.1	12.7
	211071	Pantelleria	South of Pantelleria	1891		36.77	12.02
	211080	Marsili		-1050		39.284	14.399
	212020	Methana		1922		37.615	23.336
	212030	Milos	SE Mílos, east of Fyriplaka tuff ring	140		36.699	24.439
	212040	Santorini	Nea Kameni (Liatsikas dome)	1950	1950	36.404	25.396
	212050	Nisyros	Polyvotis Micros	1888		36.586	27.16
	213002	Hasan Dagi		-6750		38.13	34.17
	213004	Acigol-Nevsehir		-2080		38.537	34.621
	213010	Erciyes Dagi		253		38.531	35.447
	213020	Nemrut Dagi		1692		38.654	42.229
	213030	Tenduruk Dagi		1855		39.356	43.874
	213040	Ararat	Upper northern flank	1840		39.7	44.3
	214010	Elbrus		50		43.351	42.442
	214020	Kazbek		-750		42.7	44.5
	214070	Ghegham Volcanic Ridge	North part of eastern cone cluster	-1900		40.283	45
	214080	Vaiyots-Sar		753		39.797	45.497
	214090	Porak		-740		40.028	45.74
	214100	Tskhouk-Karckar		-3000		39.742	45.992
	221010	Tair, Jebel at		2007	2008	15.55	41.83
	221020	Zubair Group	Jadid Island	2013	2013	15.05	42.18
	221041	Dallol	Dallol crater	2011	2011	14.242	40.3
	221060	Alu-Dalafilla	W and NW of Dalaffilla	2008	2008	13.793	40.553
	221080	Erta Ale		1967	2020	13.6	40.67
	221100	Dubbi		1900		13.579	41.809
	221101	Nabro		2011	2012	13.37	41.7
	221112	Alayta		1915		12.888	40.573
	221113	Dabbahu	NE flank (Da'Ure)	2005	2005	12.595	40.48
	221115	Manda Hararo		2009	2009	12.17	40.82
	221122	Manda-Inakir	Kammourta	1928		12.38	42.2
	221126	Ardoukoba		1978	1978	11.58	42.47
	221141	Dama Ali	Volcano Uncertain	1631		11.28	41.63
	221160	Ayelu		1928		10.082	40.702
	221170	Adwa		1928		10.063	40.831
	221190	Fentale	Caldera floor and SW flank	1820		8.975	39.93
	221200	Kone	East margin of Gariboldi caldera	1820		8.788	39.701
	221250	Tullu Moye	Wonji fault belt, SE of Lake Koka	1900		8.159	39.137
	221270	Aluto		-50		7.77	38.78
	221290	Corbetti Caldera		1957	1964	7.193	38.39
	222010	Central Island	East side of Central Island	1974	1974	3.496	36.04
	222020	South Island		1888		2.63	36.6
	222030	Barrier, The	North flank (Teleki)	1921		2.32	36.57
	222040	Namarunu	Lower eastern flanks	-6550		1.98	36.43
	222051	Emuruangogolak	South caldera rim	1910		1.5	36.33
	222052	Silali	Upper east flank	-5050		1.15	36.23
	222053	Paka		-7550		0.92	36.18
	222060	Menengai		-6050		-0.2	36.07
	222090	Olkaria	Ololbutot	1770		-0.904	36.292
	222100	Longonot	Northern flank	1863		-0.914	36.446
	222120	Lengai, Ol Doinyo	North Crater	2017	2021	-2.764	35.914
	222130	Chyulu Hills	Shaitani and Chaimu	1855		-2.68	37.88
	222160	Meru	Ash Cone	1910	1910	-3.25	36.75
	222161	Igwisi Hills	NE Volcano	-10450		-4.889	31.933
	222164	Ngozi		1450		-8.989	33.554
	222166	Rungwe		1250		-9.135	33.668
	222170	Kyejo	Sarabwe and Fiteko	1800		-9.229	33.792
	223001	Fort Portal		-2120		0.7	30.25
	223020	Nyamulagira	Summit caldera	2018	2021	-1.408	29.2
	223030	Nyiragongo		2002	2021	-1.52	29.25
	223040	Karisimbi		-8050		-1.506	29.45
	223050	Visoke	11 km north of summit (Mugogo)	1957	1957	-1.458	29.485
	224004	Santa Isabel	SE flank	1923		3.588	8.762
	224010	Cameroon	Upper SW flank (4000, 3470-3220, 2750 m)	2000	2000	4.203	9.17
	224030	Oku Volcanic Field	Lake Nyos	1986	1986	6.25	10.5
	225030	Marra, Jebel	Deriba caldera	-2000		12.95	24.27
	225050	Meidob Volcanic Field	Vent VF 214	-2950		15.32	26.47
	225060	Bayuda Volcanic Field		850		18.33	32.75
	231001	Harrat Ash Shamah	Jabal Druse	1850		32.333	37.583
	231020	Uwayrid, Harrat	Hala-'l-Bedr, Hala-'l-'Ishqua or both	640		27.08	37.25
	231040	Lunayyir, Harrat		1000		25.17	37.75
	231060	Khaybar, Harrat	Harrat Lali	650		25.5	40
	231070	Rahat, Harrat	Near Madinah	1292		23.08	39.78
	231080	Yar, Jabal		1810		17.05	42.83
	231090	Arhab, Harra of	South flank of Kaulet Hattab	500		15.63	44.08
	231110	Haylan, Jabal	West of Sirwan	-1200		15.4	45.1
	231120	Dhamar, Harras of	Near the town of Dhamar	1937		14.57	44.67
	231160	Sawad, Harra Es-		1253		13.58	46.12
	231180	Bir Borhut		950		15.515	50.935
	232010	Damavand		-5350		35.951	52.109
	232050	Taftan		1993		28.6	61.13
	233005	Mayotte	About 50 km E of the eastern tip of Mayotte Island	2018	2019	-12.83	45.17
	233010	Karthala	Chahalé crater	2007	2007	-11.75	43.38
	233014	Itasy Volcanic Field		-6050		-19.033	46.7
	233020	Fournaise, Piton de la		2020	2020	-21.244	55.708
	234000	Boomerang Seamount		1995		-37.721	77.825
	234002	St. Paul	SW flank (near Cape West)	1793		-38.72	77.53
	234010	Heard	Mawson Peak	2012	2021	-53.106	73.513
	234011	McDonald Islands		2005		-53.03	72.6
	234070	Marion Island	South side of island	2004	2004	-46.9	37.75
	241010	Kaikohe-Bay of Islands	Te Puke	400		-35.3	173.9
	241020	Auckland Volcanic Field	Rangitoto	1350		-36.9	174.87
	241021	Mayor Island	South end of caldera, Taratimi Bay	-5060		-37.28	176.25
	241030	Taranaki		1854		-39.3	174.07
	241040	Whakaari/White Island	1978/90 Crater Complex	2019	2019	-37.52	177.18
	241050	Okataina	Waimangu (Raupo Pond crater)	1981	1981	-38.12	176.5
	241060	Reporoa	Waiotapu thermal area	1180		-38.42	176.33
	241061	Maroa	Orakeikorako	180		-38.42	176.08
	241070	Taupo	East Lake Taupo (Horomatangi Reefs)	260		-38.82	176
	241080	Tongariro	Upper Te Maari Craters	2012	2012	-39.157	175.632
	241100	Ruapehu		2007	2007	-39.28	175.57
	241120	Rumble IV		1966	1966	-36.13	178.05
	241130	Rumble III		2008		-35.745	178.478
	241140	Healy	Healy caldera	1360		-35.004	178.973
	242005	Havre Seamount		2012	2012	-31.08	-179.033
	242010	Curtis Island	5-6 km NNE of Curtis Island	2009	2009	-30.543	-178.556
	242021	Macauley	22 km NNE of Macauley Island	1887		-30.21	-178.475
	242030	Raoul Island	Green Lake crater	2006	2006	-29.27	-177.92
	242050	Monowai		2012	2012	-25.887	-177.188
	243010	Unnamed		1932		-21.338	-175.65
	243030	Unnamed		2017	2017	-20.852	-175.55
	243040	Hunga Tonga-Hunga Ha'apai		2014	2015	-20.536	-175.382
	243050	Fonuafo'ou		1936		-20.32	-175.42
	243060	Tofua		2015	2021	-19.75	-175.07
	243061	Kao		1847		-19.668	-175.016
	243070	Lateiki		2019	2019	-19.18	-174.87
	243080	Home Reef		2006	2006	-18.992	-174.775
	243090	Late	NE flank	1854		-18.806	-174.65
	243091	Unnamed		2001	2001	-18.325	-174.365
	243100	Fonualei		1974		-18.023	-174.317
	243102	Curacoa	13 km north of Tafahi	1979		-15.62	-173.67
	243110	Niuafo'ou	NE part of caldera lake (Vai Lahi)	1985	1985	-15.6	-175.63
	243120	Tafu-Maka	Maka	2008	2008	-15.37	-174.23
	243130	West Mata	Prometheus and Hades vents	2008	2009	-15.1	-173.75
	244000	Vailulu'u	West side of caldera (Nafanua)	2003		-14.215	-169.058
	244010	Ofu-Olosega	Submarine vent 3 km SE of Olosega	1866	1866	-14.175	-169.618
	244020	Tutuila	Cones E of Pava'ia'i Village	440		-14.295	-170.7
	244040	Savai'i	Matavanu (north flank 402 m)	1905	1911	-13.612	-172.525
	245010	Taveuni	Near South Cape	1550		-16.82	-179.97
	245030	Nabukelevu	Dome NW of summit	1660		-19.12	177.98
	250010	St. Andrew Strait	Tuluman	1953	1957	-2.38	147.35
	250020	Baluan		1931		-2.57	147.28
	250030	Central Bismarck Sea		1972	1972	-3.03	147.78
	251001	Blup Blup		1830		-3.507	144.605
	251002	Kadovar		2018	2021	-3.608	144.588
	251010	Bam		1960	1960	-3.613	144.818
	251020	Manam		2014	2021	-4.08	145.037
	251030	Karkar		2014	2014	-4.649	145.964
	251050	Long Island	E-W fissure NNE of Motmot Island	1993	1993	-5.358	147.12
	251070	Ritter Island		2007	2007	-5.519	148.115
	252010	Langila		2015	2021	-5.525	148.42
	252040	Dakataua	Makalia	1895		-5.094	150.094
	252070	Krummel-Garbuna-Welcker		2008	2008	-5.416	150.027
	252080	Witori	Pago	2012	2012	-5.576	150.516
	252100	Hargy	Galloseulo	950		-5.33	151.1
	252110	Bamus		1886		-5.2	151.23
	252120	Ulawun		2019	2019	-5.05	151.33
	252130	Lolobau	East flank (Sili)	1911	1912	-4.92	151.158
	252140	Rabaul	Tavurvur	2014	2014	-4.271	152.203
	252150	Tavui		-4946		-4.12	152.2
	253010	Lamington		1951	1956	-8.95	148.15
	253030	Victory		1890	1935	-9.2	149.07
	253040	Waiowa		1943	1944	-9.57	149.075
	253060	Dawson Strait Group	Oiau	1350		-9.62	150.88
	254020	Ambitle	East side of caldera	-350		-4.08	153.65
	255010	Balbi	Crater B ?	1825		-5.92	154.98
	255011	Billy Mitchell		1580		-6.092	155.225
	255020	Bagana		2000	2021	-6.137	155.196
	255030	Loloru		-1050		-6.52	155.62
	255050	Simbo	Ngusuna crater?	1910		-8.292	156.52
	255060	Kavachi		2020	2021	-8.991	157.979
	255070	Savo		1865		-9.13	159.82
	256010	Tinakula		2018	2021	-10.386	165.804
	257010	Suretamatai	NW flank	1965	1966	-13.8	167.47
	257020	Gaua	Mt. Garat	2011	2011	-14.27	167.5
	257021	Mere Lava		1606		-14.45	168.05
	257030	Ambae		2017	2018	-15.389	167.835
	257040	Ambrym	Benbow and Marum	2008	2018	-16.25	168.12
	257050	Lopevi		2014	2014	-16.507	168.346
	257060	Epi	Epi B	2004	2004	-16.68	168.37
	257070	Kuwae	Karua	1980		-16.829	168.536
	257090	Traitor's Head	Four submarine vents N of Erromango	1959		-18.754	169.238
	257100	Yasur		1774	2021	-19.532	169.447
	258001	Eastern Gemini Seamount		1996	1996	-20.98	170.28
	258010	Matthew Island		1976		-22.33	171.32
	258020	Hunter Island		1983		-22.4	172.05
	259010	Newer Volcanics Province	Mt. Gambier	-2900		-37.77	142.5
	260010	Barren Island		2018	2021	12.278	93.858
	261020	Seulawah Agam	NNE flank (van Heutsz crater)	1839	1839	5.448	95.658
	261030	Peuet Sague		2000	2000	4.903	96.289
	261050	Telong, Bur ni		1937		4.769	96.821
	261070	Singkut		1881		3.248	98.501
	261080	Sinabung		2020	2021	3.17	98.392
	261120	Sorikmarapi		1996		0.686	99.539
	261130	Talakmau		1937		0.079	99.98
	261140	Marapi	Verbeek Crater	2018	2018	-0.38	100.474
	261150	Tandikat-Singgalang	Tandikat	1924	1924	-0.39	100.331
	261160	Talang		2007	2007	-0.979	100.681
	261170	Kerinci		2018	2020	-1.697	101.264
	261180	Sumbing		1921	1921	-2.414	101.728
	261220	Kaba		2000	2000	-3.522	102.615
	261230	Dempo		2017	2017	-4.016	103.121
	261251	Ranau		1903	1903	-4.871	103.925
	261270	Suoh	Pematang Bata	1933	1933	-5.25	104.27
	262000	Krakatau		2018	2020	-6.102	105.423
	263040	Perbakti-Gagak	Kawah Parabakti	1939		-6.75	106.7
	263050	Salak	Kawah Cikaluwung Putri	1938		-6.72	106.73
	263060	Gede-Pangrango		1957	1957	-6.77	106.965
	263090	Tangkuban Parahu		2019	2019	-6.77	107.6
	263100	Papandayan	Kawah Baru, Kawah Nangklak	2002	2002	-7.32	107.73
	263130	Guntur		1887		-7.143	107.84
	263140	Galunggung		1984	1984	-7.25	108.058
	263170	Cereme		2015	2015	-6.895	108.408
	263180	Slamet		2014	2014	-7.242	109.208
	263200	Dieng Volcanic Complex	Sileri Crater	2018	2018	-7.2	109.879
	263210	Sundoro		1971	1971	-7.3	109.992
	263220	Sumbing		1730		-7.384	110.07
	263240	Merbabu		1797		-7.454	110.44
	263250	Merapi		2020	2021	-7.54	110.446
	263251	Muria	East flank (Gunung Bambang)	-160		-6.62	110.88
	263260	Lawu		1885	1885	-7.625	111.192
	263270	Wilis		1641		-7.808	111.758
	263280	Kelut		2014	2014	-7.93	112.308
	263290	Arjuno-Welirang	Gunung Welirang	1991		-7.733	112.575
	263291	Penanggungan		200		-7.616	112.62
	263300	Semeru	Jonggring Seloko	2014	2021	-8.108	112.922
	263310	Tengger Caldera		2020	2020	-7.942	112.95
	263320	Lamongan		1953	1953	-7.981	113.341
	263330	Iyang-Argapura		1597		-7.97	113.57
	263340	Raung		2021	2021	-8.119	114.056
	263350	Ijen	Kawah Ijen	2002	2002	-8.058	114.242
	264010	Batur		1999	2000	-8.242	115.375
	264020	Agung	Summit crater	2017	2019	-8.343	115.508
	264030	Rinjani	Barujari Crater	2016	2016	-8.42	116.47
	264040	Tambora	NE part of caldera floor	1967		-8.25	118
	264050	Sangeang Api	Summit crater	2017	2020	-8.2	119.07
	264071	Ranakah	Anak Ranakah	1991		-8.62	120.52
	264080	Inierie	NE side (Wolo Bobo)	-8050		-8.875	120.95
	264090	Inielika	Summit crater complex	2001	2001	-8.73	120.98
	264100	Ebulobo		2017	2017	-8.817	121.191
	264110	Iya		1971	1971	-8.891	121.641
	264140	Kelimutu	Tiwu Nua Muri	1968	1968	-8.77	121.82
	264150	Paluweh	Rokatenda	2012	2013	-8.32	121.708
	264160	Egon		2008	2008	-8.676	122.455
	264180	Lewotobi		2014	2014	-8.542	122.775
	264200	Leroboleng		2003	2003	-8.365	122.833
	264220	Iliboleng		1993	1993	-8.342	123.258
	264230	Lewotolok		2020	2021	-8.274	123.508
	264250	Iliwerung	Hobal (submarine vent on SE flank)	2013	2013	-8.53	123.57
	264260	Tara, Batu		2007	2015	-7.791	123.585
	264270	Sirung		2015	2015	-8.508	124.13
	265030	Gunungapi Wetar		1699		-6.642	126.65
	265040	Wurlali		1892	1892	-7.125	128.675
	265050	Teon		1904		-6.976	129.144
	265060	Nila	East flank	1968	1968	-6.73	129.5
	265070	Serua	Summit and south flank	1921		-6.312	130.017
	265090	Banda Api	Summit, north and south flanks	1988	1988	-4.523	129.881
	266010	Colo	Gunung Colo	1983	1983	-0.162	121.601
	266020	Ambang		2005		0.75	124.42
	266030	Soputan		2020	2020	1.112	124.737
	266040	Riendengan-Sempu		1819		1.13	124.758
	266100	Lokon-Empung	Tompaluan	2015	2015	1.358	124.792
	266110	Mahawu		1977		1.352	124.865
	266130	Tangkoko-Duasudara	Batu Angus	1880		1.518	125.185
	267010	Ruang		2002	2002	2.3	125.37
	267020	Karangetang		2018	2021	2.781	125.407
	267030	Banua Wuhu		1968	1968	3.138	125.491
	267040	Awu		2004	2004	3.689	125.447
	268010	Dukono	Malupang Magiwe and Malupang Warirang	1933	2021	1.693	127.894
	268030	Ibu		2008	2021	1.488	127.63
	268040	Gamkonora		2013	2013	1.38	127.53
	268060	Gamalama		2018	2018	0.8	127.33
	268063	Moti		1774		0.454	127.411
	268070	Makian		1988	1988	0.32	127.4
	271011	Parker		1640	1641	6.113	124.892
	271020	Matutum		1911		6.37	125.07
	271031	Leonard Range		120		7.382	126.047
	271040	Makaturing		1882		7.644	124.317
	271060	Ragang		1916		7.691	124.507
	271070	Musuan		1886		7.877	125.068
	271080	Camiguin	Upper NE flank of Hibok-Hibok	1948	1953	9.203	124.673
	272020	Kanlaon		2017	2017	10.412	123.132
	272050	Cabalían		1820		10.285	125.218
	272070	Mahagnao		1895		10.882	124.888
	272080	Biliran		1939		11.523	124.535
	273010	Bulusan		2017	2017	12.769	124.056
	273030	Mayon		2018	2019	13.257	123.685
	273041	Iriga		1628		13.458	123.451
	273042	Isarog		-3500		13.658	123.38
	273050	Banahaw	Banáhao	1909		14.07	121.48
	273060	San Pablo Volcanic Field	Sampaloc Lake	1350		14.12	121.3
	273070	Taal		2020	2020	14.002	120.993
	273081	Mariveles		-2050		14.527	120.482
	273083	Pinatubo	Caldera floor	1993	1993	15.13	120.35
	273088	Ambalatungan Group	Mt. Binuluan	1952		17.32	121.1
	273090	Cagua		1860		18.222	122.123
	274010	Camiguin de Babuyanes	SW flank	1857		18.83	121.86
	274020	Didicas	NNE side	1978	1978	19.077	122.202
	274030	Babuyan Claro	Smith volcano	1924		19.523	121.94
	274050	Unnamed		1854		20.33	121.75
	274060	Iraya		1454		20.469	122.01
	275001	Hainan Volcanic Field	Nansheling ridge	1933	1933	19.905	110.229
	275060	Cendres, Ile des		1923	1923	10.158	109.014
	275070	Veteran		1928		9.83	109.05
	275080	Popa		-442		20.92	95.25
	275110	Tengchong	Dayingshan or Heikongshan	1609		25.23	98.5
	281031	Kueishantao		1853	1853	24.841	121.953
	281032	Tatun Volcanic Group	Shamao	648		25.178	121.553
	282010	Submarine Volcano NNE of Iriomotejima		1924		24.57	123.93
	282020	Io-Torishima		1968	1968	27.881	128.223
	282021	Yokoatejima		1835		28.797	128.997
	282030	Suwanosejima	O-take	2004	2021	29.638	129.714
	282040	Nakanoshima	On-take	1949		29.859	129.857
	282043	Kuchinoshima		1190		29.968	129.926
	282050	Kuchinoerabujima		2020	2020	30.443	130.217
	282060	Kikai		2020	2020	30.793	130.305
	282070	Ata	Kaimon	1615		31.22	130.57
	282080	Aira	Minamidake summit crater	2017	2021	31.593	130.657
	282081	Yonemaru-Sumiyoshiike	Yonemaru	-6200		31.771	130.592
	282090	Kirishimayama	Shinmoedake	2018	2018	31.934	130.862
	282091	Fukue	Hino-take	-400		32.657	128.849
	282100	Unzendake	Fugen-dake	1996	1996	32.761	130.299
	282110	Asosan		2019	2020	32.884	131.104
	282120	Kujusan	Hosho lava dome (east flank)	1995	1996	33.086	131.249
	282130	Yufu-Tsurumi		867	867	33.282	131.39
	283001	Abu	Kasa-yama	-6850		34.5	131.6
	283002	Sanbesan		650		35.141	132.622
	283010	Izu-Tobu	Teishi-kaikyu (4 km NE of Ito City)	1989	1989	34.9	139.098
	283020	Hakoneyama		2015	2015	35.233	139.021
	283030	Fujisan		1854	1855	35.361	138.728
	283031	Yokodake	Yoko-dake	1200		36.087	138.32
	283040	Ontakesan	Summit crater	2014	2014	35.893	137.48
	283050	Hakusan	Midoriga-ike	1659	1659	36.155	136.771
	283060	Norikuradake		-50		36.106	137.554
	283070	Yakedake	SE flank (Azusa-gawa)	1995	1995	36.227	137.587
	283080	Midagahara		1858		36.571	137.59
	283090	Niigata-Yakeyama	Upper east flank	1998		36.921	138.036
	283100	Myokosan		-750		36.891	138.114
	283110	Asamayama		2019	2019	36.406	138.523
	283120	Kusatsu-Shiranesan	Motoshiranesan	2018	2018	36.618	138.528
	283122	Harunasan	Futatsu-dake	550		36.477	138.851
	283130	Akagisan		1938		36.56	139.193
	283131	Hiuchigatake	Miike-dake lava dome	1544		36.955	139.285
	283140	Nikko-Shiranesan	Shirane-san	1952	1952	36.799	139.376
	283141	Nantaisan		-9540		36.765	139.491
	283142	Omanago Group	Mitsu-dake	-3050		36.795	139.507
	283143	Takaharayama	Fuji-san lava dome	-4570		36.9	139.777
	283150	Nasudake	Chausu-dake (west side)	1963	1963	37.125	139.963
	283151	Numazawa		-3400		37.444	139.566
	283160	Bandaisan	Kobandai	1888	1888	37.601	140.072
	283170	Adatarayama	Numanotaira	1996	1996	37.647	140.281
	283180	Azumayama	Issaikyo (Oana)	1977	1977	37.735	140.244
	283190	Zaozan [Zaosan]	Okama	1940	1940	38.144	140.44
	283200	Naruko		837		38.729	140.734
	283210	Kurikomayama		1950		38.961	140.788
	283220	Chokaisan	E side of Shinzan, W of Kojin-yama	1974	1974	39.099	140.049
	283230	Akita-Komagatake	Me-dake	1970	1971	39.761	140.799
	283240	Iwatesan		1934	1935	39.853	141.001
	283250	Hachimantai		-5350		39.958	140.854
	283260	Akita-Yakeyama	Kare-numa	1997	1997	39.964	140.757
	283262	Megata		-2050		39.95	139.73
	283270	Iwakisan		1863		40.656	140.303
	283271	Towada	Goshikiiwa (NE rim Nakanoumi crater)	915		40.51	140.88
	283280	Hakkodasan	SW flank of O-dake (Jigoku-numa)	1550		40.659	140.877
	283290	Osorezan		1787		41.279	141.12
	284010	Izu-Oshima	Mihara-yama (1987 summit crater)	1990	1990	34.724	139.394
	284011	Toshima	Kajiana crater	-4550		34.52	139.279
	284020	Niijima	Mukai-yama	886		34.397	139.27
	284030	Kozushima	Tenjo-san	838		34.219	139.153
	284040	Miyakejima		2010	2010	34.094	139.526
	284041	Mikurajima	Tsubunegamori & Yasukajigamori domes	-4100		33.874	139.602
	284050	Hachijojima		1707		33.137	139.766
	284060	Aogashima	Maru-yama, SW part of Ikenosawa crater	1780	1785	32.458	139.759
	284070	Myojinsho	Myojinsho	1988	1988	31.888	139.918
	284080	Sumisujima		2005	2005	31.44	140.051
	284090	Izu-Torishima		2013	2013	30.484	140.303
	284091	Sofugan		1975		29.794	140.342
	284096	Nishinoshima		2019	2020	27.247	140.874
	284100	Kaitoku Seamount		1986	1986	26.127	141.102
	284110	Kita-Ioto	Funka-Asane	2003	2003	25.424	141.284
	284120	Ioto	Asodai	2012	2012	24.751	141.289
	284121	Kita-Fukutokutai	24.443 N, 141.378 E	2001	2001	24.417	141.417
	284130	Fukutoku-Oka-no-Ba		2010	2010	24.285	141.481
	284131	Minami-Hiyoshi		1996	1996	23.5	141.935
	284132	Nikko		1979		23.078	142.326
	284133	Fukujin		1982		21.93	143.47
	284134	Kasuga 1	21.78 N 143.71 E	1975		21.765	143.71
	284140	Farallon de Pajaros	SW of Uracas (Makhahnas seamount)	1967	1967	20.546	144.893
	284141	Ahyi		2014	2014	20.42	145.03
	284142	Supply Reef	Volcano Uncertain: NW of Supply Reef (~20.3 N, 144.9E)	1989	1989	20.13	145.1
	284150	Asuncion		1924		19.671	145.406
	284160	Agrigan		1917		18.77	145.67
	284170	Pagan	North Pagan	2012	2012	18.13	145.8
	284180	Alamagan		1887		17.6	145.83
	284190	Guguan		1901		17.307	145.845
	284193	South Sarigan Seamount		2010	2010	16.58	145.78
	284200	Anatahan		2007	2008	16.35	145.67
	284202	Ruby		1995	1995	15.62	145.57
	284210	Esmeralda Bank		1987		15	145.25
	284211	NW Rota-1	Upper South flank (Brimstone Pit)	2003	2010	14.601	144.775
	284305	Mariana Back-Arc Segment at 15.5°N	Along a 10 km N-S line at 15.4°N	2013	2015	15.406	144.506
	285010	Oshima-Oshima	Nishi-yama	1790		41.51	139.367
	285011	Esan		1874		41.805	141.166
	285020	Hokkaido-Komagatake		2000	2000	42.063	140.677
	285030	Toya	Usu N flank (Kompira-yama & W Nishi-yama)	2000	2001	42.544	140.839
	285031	Niseko		-4900		42.875	140.659
	285032	Yoteizan	NW flank (Hangetsu-ko)	-1050		42.827	140.812
	285034	Kuttara	West flank (Jigoku-dani)	1820		42.491	141.16
	285040	Shikotsu	Tarumai	1981	1981	42.688	141.38
	285041	Rishirizan		-5830		45.179	141.242
	285050	Tokachidake	1962-II Crater	2004	2004	43.418	142.686
	285060	Taisetsuzan	Asahi-dake	1739		43.664	142.854
	285061	Maruyama	Maru-yama (No. 1 crater)	1898	1898	43.418	143.031
	285070	Akan	Me-Akan (Ponmachineshiri)	2008	2008	43.384	144.013
	285080	Kussharo	Atosanupuri	1320		43.615	144.427
	285081	Mashu	Kamuinupuri	1080		43.572	144.561
	285082	Rausudake		1800		44.076	145.122
	285083	Tenchozan		100		44.044	145.086
	285090	Shiretoko-Iozan	NW flank	1935	1936	44.133	145.161
	290010	Tomariyama [Golovnin]	Eastern explosion crater	1848		43.844	145.504
	290020	Raususan [Mendeleev]		1900		43.979	145.733
	290030	Chachadake [Tiatia]		1982	1982	44.353	146.252
	290040	Berutarubesan [Berutarube]		1812		44.462	146.932
	290041	Moekeshiwan [Lvinaya Past]		-7480		44.608	146.994
	290050	Etorofu-Atosanupuri [Atosanupuri]		1932		44.808	147.131
	290061	Unnamed	17.5 km NW of Iturup Island	1967		45.022	147.019
	290070	Etorofu-Yakeyama [Grozny Group]	Etorofu-Yake-yama / Ivan Grozny	2013	2013	45.012	147.871
	290080	Sashiusudake [Baransky]		1951		45.1	148.019
	290090	Chirippusan [Chirip]	SE of Bogdan Khmelinitskii summit	1860		45.338	147.92
	290100	Moyorodake [Medvezhia]	Kudriavy	1999	1999	45.389	148.838
	290120	Kolokol Group	Berg	2009		46.042	150.083
	290150	Chirpoi	Snow	2012	2016	46.532	150.871
	290160	Unnamed		1972	1972	46.47	151.28
	290161	Milna	Goriaschaia Sopka	1944		46.815	151.786
	290180	Zavaritzki Caldera	North end of caldera lake	1957	1957	46.925	151.95
	290190	Prevo Peak		1825		47.02	152.12
	290200	Ketoi		2018	2018	47.35	152.475
	290210	Ushishur	SE caldera wall	1884		47.52	152.8
	290211	Srednii		1880	1880	47.6	152.92
	290220	Rasshua		1957		47.77	153.02
	290240	Sarychev Peak		2021	2021	48.092	153.2
	290250	Raikoke		2019	2019	48.292	153.25
	290260	Chirinkotan		2016	2017	48.98	153.48
	290270	Ekarma	Upper SW flank	2010	2010	48.958	153.93
	290290	Sinarka		2014	2014	48.873	154.182
	290300	Kharimkotan	Severgin	1933	1933	49.12	154.508
	290310	Tao-Rusyr Caldera	Krenitzyn Peak (east flank)	1952	1952	49.35	154.7
	290320	Nemo Peak		1938		49.57	154.808
	290340	Fuss Peak		1933		50.267	155.246
	290350	Karpinsky Group	East side of Karpinsky Ridge	1952		50.148	155.373
	290360	Chikurachki		2016	2016	50.324	155.461
	290380	Ebeko		2016	2021	50.686	156.014
	290390	Alaid		2018	2018	50.861	155.565
	300010	Kambalny		2017	2017	51.306	156.875
	300020	Koshelev		1741		51.356	156.753
	300021	Yavinsky	NW flank (Ukho)	-4050		51.533	156.629
	300022	Diky Greben		350		51.452	156.978
	300023	Kurile Lake		-6440		51.45	157.12
	300030	Iliinsky	NE flank	1901		51.498	157.203
	300040	Zheltovsky		1972		51.577	157.328
	300050	Ksudach	Stubel	1907		51.844	157.572
	300053	Khodutka		-300		52.062	157.711
	300060	Mutnovsky		2000	2000	52.449	158.196
	300070	Gorely		2010	2010	52.559	158.03
	300080	Opala		1894		52.543	157.339
	300082	Tolmachev Dol	NW part of Tolmachev Dol	300		52.63	157.58
	300083	Vilyuchik		-8050		52.7	158.28
	300084	Barkhatnaya Sopka		-3550		52.802	158.24
	300090	Koryaksky	Upper NW flank (3000 m)	2008	2009	53.321	158.712
	300100	Avachinsky		2001	2001	53.256	158.836
	300110	Dzenzursky		1957	1957	53.637	158.922
	300120	Zhupanovsky		2016	2016	53.589	159.15
	300121	Veer		1856		53.75	158.45
	300122	Kostakan	Glavny	1350		53.83	158.05
	300123	Bakening	Western flank	-550		53.905	158.07
	300124	Zavaritsky	14 km WNW of Zavaritsky	-800		53.905	158.385
	300125	Akademia Nauk	North margin of Karymsky Lake	1996	1996	53.98	159.45
	300130	Karymsky		2020	2021	54.049	159.443
	300140	Maly Semyachik	Ceno-Semiachik (Toitsky Crater)	1952		54.135	159.674
	300150	Bolshoi Semiachik	Korona and Yezh lava domes	-4450		54.32	160.02
	300160	Taunshits		-550		54.528	159.804
	300170	Uzon	Khloridnoe Lake	200		54.5	159.97
	300180	Kikhpinych	East flank of Savich (Krab cone)	1550		54.489	160.251
	300190	Krasheninnikov	Northern cone (Pauk) & SW of S cone	1550		54.596	160.27
	300200	Kronotsky	Summit and/or south flank (3150 m)	1923		54.753	160.533
	300210	Gamchen	SE flank (Barany, Lukovitsa)	-550		54.974	160.703
	300220	Komarov		950		55.033	160.725
	300221	Vysoky		-550		55.064	160.765
	300230	Kizimen		2010	2013	55.131	160.32
	300240	Tolbachik	Tolbachinsky Dol	2012	2013	55.832	160.326
	300250	Bezymianny		2010	2021	55.972	160.595
	300260	Klyuchevskoy		2019	2021	56.056	160.642
	300261	Ushkovsky		1890		56.113	160.509
	300270	Sheveluch		1999	2021	56.653	161.36
	300271	Piip		-5050		55.42	167.33
	300272	Khangar		1500		54.761	157.407
	300273	Cherpuk Group	North and South Cherpuk	-4550		55.55	157.47
	300280	Ichinsky	SSW flank	1740		55.678	157.718
	300360	Bolshoi-Kekuknaysky	N flank of Kekuknaysky (Kekuk Crater)	-5310		56.483	157.917
	300450	Alney-Chashakondzha	Alney volcano	1600		56.656	159.647
	300511	Shisheika		-2240		57.153	161.09
	300512	Terpuk		-800		57.2	159.83
	300520	Sedanka Lava Field		-7050		57.317	160.067
	300550	Gorny Institute		1250		57.33	160.2
	300551	Kinenin		850		57.35	160.97
	300552	Bliznetsy		-1060		57.35	161.37
	300560	Titila		-550		57.406	160.108
	300590	Elovsky	NE side (Ozernovsky lava flow)	-7550		57.55	160.53
	300650	Nylgimelkin		-3550		57.97	160.65
	300671	Spokoiny		-3450		58.13	160.82
	300680	Ostry	SW flank cinder cone	-2050		58.18	160.82
	300700	Severny	WSW flank (Tobeltsen)	-1550		58.28	160.87
	302030	Udokan Plateau	Chepe	-220		56.28	117.77
	302060	Jom-Bolok	Jom-Bolok (Atkinson cone)	-5180		52.713	99.021
	303010	Taryatu-Chulutu	Horgo cone	-2980		48.133	99.95
	304030	Kunlun Volcanic Group	Ashi Shan	1951		35.52	80.2
	305011	Arxan-Chaihe		0		47.45	120.8
	305030	Wudalianchi	Laoheishan	1776		48.722	126.15
	305040	Jingbo		-520		44.08	128.83
	305050	Longgang Group	Jinlongdingzi	350		42.33	126.5
	305060	Changbaishan	Liuhaojie tuff ring?	1903		41.98	128.08
	306030	Ulreung		-2990		37.5	130.87
	306040	Halla		1007		33.361	126.53
	311020	Kiska	Upper NW? flank	1990	1990	52.103	177.602
	311050	Little Sitkin	Summit and west flank	1828	1830	51.95	178.543
	311060	Semisopochnoi		2021	2021	51.93	179.58
	311070	Gareloi		1996		51.79	-178.794
	311080	Tanaga		1914		51.885	-178.146
	311090	Takawangha		1550		51.873	-178.006
	311110	Kanaga		2012	2012	51.923	-177.168
	311111	Moffett		-1600		51.944	-176.747
	311120	Great Sitkin		2019	2019	52.076	-176.13
	311130	Kasatochi		2008	2008	52.177	-175.508
	311140	Koniuji		-1150		52.22	-175.13
	311160	Atka		1996		52.331	-174.139
	311161	Korovin		2006	2007	52.381	-174.166
	311180	Seguam	Near Pyre Peak	1993	1993	52.315	-172.51
	311190	Amukta		1997		52.5	-171.252
	311210	Yunaska		1937	1937	52.643	-170.629
	311230	Carlisle		1987		52.894	-170.054
	311240	Cleveland		2020	2020	52.825	-169.944
	311260	Kagamil		1929		52.974	-169.72
	311270	Vsevidof	West flank fissure	1957	1957	53.13	-168.693
	311290	Okmok	NE caldera floor	2008	2008	53.43	-168.13
	311300	Bogoslof		2016	2017	53.93	-168.03
	311310	Makushin		1995	1995	53.891	-166.923
	311320	Akutan		1992		54.134	-165.986
	311340	Westdahl	ENE flank (1560-760 m)	1991	1992	54.516	-164.65
	311350	Fisher	Mount Finch	1830		54.65	-164.43
	311360	Shishaldin	Summit crater	2019	2020	54.756	-163.97
	311370	Isanotski		1845		54.765	-163.723
	311380	Roundtop		-7600		54.8	-163.589
	311390	Amak		1796		55.424	-163.149
	312030	Pavlof		2016	2016	55.417	-161.894
	312050	Dana		-1890		55.641	-161.214
	312060	Kupreanof	SSW flank (1575 m)	1987	1987	56.011	-159.797
	312070	Veniaminof		2021	2021	56.17	-159.38
	312080	Black Peak		-1900		56.552	-158.785
	312090	Aniakchak		1951	1951	56.88	-158.17
	312100	Yantarni		-800		57.019	-157.185
	312110	Chiginagak		1998	1998	57.135	-156.99
	312130	Ugashik-Peulik	Peulik	1852		57.751	-156.368
	312131	Ukinrek Maars	West and East Ukinrek Maars	1977	1977	57.832	-156.51
	312140	Martin	Volcano Uncertain: SW of Trident; probably Martin	1953		58.172	-155.361
	312150	Mageik		1946		58.195	-155.253
	312160	Trident	SW flank	1974		58.236	-155.1
	312170	Katmai		1931	1931	58.28	-154.963
	312180	Novarupta		1950		58.27	-155.157
	312190	Griggs		-1790		58.354	-155.092
	312200	Snowy Mountain	NE Snowy Mountain	1710		58.336	-154.682
	312250	Kaguyak	Kaguyak caldera	-3850		58.608	-154.028
	312260	Fourpeaked	Fissure trending N from summit	2006	2006	58.77	-153.672
	313010	Augustine		2005	2006	59.363	-153.43
	313020	Iliamna		1987	1987	60.032	-153.09
	313030	Redoubt	South of 1990 dome	2009	2009	60.485	-152.742
	313040	Spurr	South flank (Crater Peak)	1992	1992	61.299	-152.251
	313050	Hayes		1200		61.64	-152.411
	314010	St. Paul Island	Several km SW of St. Paul	1943		57.18	-170.3
	314060	Imuruk Lake	Lost Jim Cone	300		65.517	-163.45
	315001	Buzzard Creek		-1050		64.062	-148.433
	315020	Wrangell		2002	2002	62.006	-144.017
	315030	Churchill		847		61.38	-141.75
	315040	Edgecumbe		-2220		57.05	-135.75
	320030	Atlin Volcanic Field		1898		59.68	-133.32
	320060	Edziza	SW flank of Ice Peak	950		57.72	-130.63
	320080	Hoodoo Mountain		-7050		56.78	-131.28
	320090	Iskut-Unuk River Cones	Lava Fork	1904		56.58	-130.55
	320100	Tseax River Cone		1690		55.12	-128.9
	320140	Nazko		-5220		52.928	-123.732
	320150	Wells Gray-Clearwater	Kostal Cone	1550		52.33	-120.57
	320180	Meager	NE flank of Plinth Peak	-410		50.63	-123.5
	320200	Garibaldi	SE flank (Opal Cone)	-8060		49.85	-123
	321010	Baker	Sherman Crater	1884		48.777	-121.813
	321020	Glacier Peak		1700		48.112	-121.113
	321030	Rainier		1894	1894	46.853	-121.76
	321040	Adams	East flank?	950		46.206	-121.49
	321050	St. Helens	South of 1980-1986 lava dome	2004	2008	46.2	-122.18
	321060	West Crater	Bare Mountain	-5750		45.88	-122.08
	321070	Indian Heaven	Big Lava Bed	-6250		45.93	-121.82
	322010	Hood	Crater Rock	1907		45.374	-121.695
	322020	Jefferson	S of Jefferson (South Cinder Peak)	950		44.674	-121.8
	322030	Blue Lake Crater		680		44.411	-121.774
	322040	Sand Mountain Field		-950		44.38	-121.93
	322060	Belknap	Belknap Crater	480		44.285	-121.841
	322070	Three Sisters		1853		44.133	-121.767
	322090	Bachelor	North flank (Egan cone)	-5800		43.979	-121.688
	322100	Davis Lake	S flank of Hamner Butte (Black Rock)	-2790		43.57	-121.82
	322110	Newberry	S caldera wall	690		43.722	-121.229
	322160	Crater Lake	Lava dome ENE of Wizard Island	-2850		42.93	-122.12
	322170	Diamond Craters		-5610		43.1	-118.75
	322190	Jordan Craters	Coffeepot Crater	-1250		43.147	-117.46
	323010	Shasta		1786		41.409	-122.193
	323020	Medicine Lake	East flank (Glass Mountain ?)	1910		41.611	-121.554
	323080	Lassen Volcanic Center	Lassen Peak	1914	1917	40.492	-121.508
	323110	Mono Lake Volcanic Field		1890	1890	38	-119.03
	323120	Mono-Inyo Craters	Inyo Craters (S Deadman, Obsidian, Glass Creek)	1380		37.804	-119.029
	323150	Mammoth Mountain	North flank of Mammoth Mountain	1260		37.631	-119.032
	323160	Ubehebe Craters		-150		37.02	-117.45
	323200	Salton Buttes	Rock Hill, N & S Red Hill	210		33.197	-115.616
	324010	Black Butte Crater Lava Field		-8400		43.183	-114.352
	324020	Craters of the Moon	South of Big Craters, near Broken Top	-130		43.42	-113.5
	324030	Wapi Lava Field	Kings Bowl Rift, Wapi Lava Field	-300		42.88	-113.22
	324040	Hell's Half Acre		-3250		43.5	-112.45
	325010	Yellowstone	Indian Pond crater (N of Yellowstone Lake)	-1350		44.43	-110.67
	327040	Markagunt Plateau	Panguitch Lake	1050		37.58	-112.67
	327050	Black Rock Desert	Ice Springs Craters	1290		38.97	-112.5
	327110	Carrizozo	Little Black Peak	-3250		33.78	-105.93
	327120	Zuni-Bandera	McCartys flow	-1170		34.8	-108
	327812	Red Hill	Zuni Salt Lake maar	-9450		34.25	-108.83
	328010	Dotsero		-2200		39.661	-107.035
	329010	Uinkaret Field	Little Springs	1100		36.38	-113.13
	329020	San Francisco Volcanic Field	Sunset Crater and SE-trending fissures	1075		35.347	-111.678
	331010	Endeavour Segment		-3490		47.95	-129.1
	331011	Cobb Segment		-1180		46.88	-129.33
	331020	CoAxial Segment	N end CoAxial segment, Juan de Fuca Ridge	1993	1993	46.52	-129.58
	331021	Axial Seamount	NE flank	2015	2015	45.95	-130
	331030	Cleft Segment	N Cleft Segment, S Juan de Fuca Ridge	1986		44.83	-130.3
	331031	North Gorda Ridge Segment	Near center of North Gorda Ridge segment	1996	1996	42.67	-126.78
	331040	Escanaba Segment	40 deg 59 min North	-2260		40.98	-127.5
	332000	Loihi		1996	1996	18.92	-155.27
	332010	Kilauea		2020	2021	19.421	-155.287
	332020	Mauna Loa	Mokuaweoweo, SW and NE rift zones	1984	1984	19.475	-155.608
	332030	Mauna Kea	NE flank (Puu Lehu, 3130 m)	-2460		19.82	-155.47
	332040	Hualalai	NW rift zone (520 m)	1800	1801	19.692	-155.87
	332060	Haleakala	SW rift zone (180-360 m)	1750		20.708	-156.25
	333010	Teahitia		1985	1985	-17.564	-148.821
	333020	Rocard		1972	1972	-17.662	-148.586
	333030	Moua Pihaa		1970	1970	-18.325	-148.525
	333040	Mehetia	SE of Mehetia (-1700 m?)	1981	1981	-17.874	-148.068
	333050	Adams Seamount		-50		-25.37	-129.27
	333060	Macdonald		1987	1989	-28.98	-140.25
	334020	Northern EPR at 17°N	16.80°N	-50		16.55	-105.32
	334021	Northern EPR at 16°N		-50		15.83	-105.43
	334040	Northern EPR at 10.7°N		2003	2003	10.73	-103.58
	334050	Northern EPR at 9.8°N	East Pacific Rise (9.8 deg N)	2005	2006	9.83	-104.3
	334070	Galapagos Rift		1996		0.792	-86.15
	334100	Southern EPR at 8°S	East Pacific Rise (8.3 deg S)	1964	1969	-8.27	-107.95
	334120	Southern EPR-Segment K		1990		-17.436	-113.206
	334130	Southern EPR-Segment J		1890		-18.175	-113.35
	334140	Southern EPR-Segment I		1915		-18.53	-113.42
	335020	Hollister Ridge	Seamount by Pacific-Antarctic Ridge?	1991	1991	-53.998	-139.845
	335030	Udintsev Transform	Udinstev Fracture Zone	1990	1990	-56.153	-143.373
	341001	Pinacate		1934	1935	31.772	-113.498
	341020	Barcena	South end of Isla San Benedicto	1952	1953	19.3	-110.82
	341021	Socorro	Submarine vent 3 km W of Punta Tosca	1993	1994	18.78	-110.95
	341024	Sanganguey		1742		21.45	-104.73
	341030	Ceboruco	Upper west flank	1870	1875	21.125	-104.508
	341040	Colima		2019	2019	19.514	-103.62
	341060	Michoacan-Guanajuato	Parícutin	1943	1952	19.85	-101.75
	341061	Zitacuaro-Valle de Bravo	West of Valle de Bravo	-3050		19.4	-100.25
	341062	Jocotitlan		1270		19.73	-99.758
	341070	Toluca, Nevado de		-1350		19.108	-99.758
	341080	Chichinautzin	Xitle	400		19.08	-99.13
	341090	Popocatepetl		2005	2021	19.023	-98.622
	341091	Malinche, La		-1170		19.231	-98.032
	341093	Humeros, Los	NW and SE sides of caldera	-4470		19.68	-97.45
	341095	Naolinco Volcanic Field	Rincón de Chapultepec	-1200		19.67	-96.75
	341096	Cofre de Perote	Lower NE flank (El Volcancillo)	1150		19.492	-97.15
	341098	Cumbres, Las	North flank (Yolotepec lava dome)	-3920		19.15	-97.27
	341100	Orizaba, Pico de		1846		19.03	-97.27
	341110	San Martin		1932		18.57	-95.2
	341120	Chichon, El		1982	1982	17.36	-93.228
	341130	Tacana	NE flank (ca. 3600 m)	1986	1986	15.132	-92.109
	342020	Tajumulco		1863		15.043	-91.903
	342030	Santa Maria	SW flank (Santiaguito)	1922	2021	14.757	-91.552
	342040	Almolonga		1891		14.797	-91.519
	342060	Atitlan		1856		14.583	-91.186
	342080	Acatenango	Pico Central-Yepocapa saddle	1972	1972	14.501	-90.876
	342090	Fuego		2002	2021	14.473	-90.88
	342100	Agua		1541		14.465	-90.743
	342110	Pacaya	MacKenney Crater	2015	2021	14.382	-90.601
	342120	Tecuamburro	NW flank (Ixpaco Crater)	-960		14.156	-90.407
	342160	Suchitan		1469		14.4	-89.78
	343010	Apaneca Range		1990		13.872	-89.742
	343020	Santa Ana		2005	2005	13.853	-89.63
	343030	Izalco	SSE flank (550 m below summit)	1966	1966	13.813	-89.633
	343050	San Salvador	Boquerón summit and north flank	1917	1917	13.734	-89.294
	343060	Ilopango	Islas Quemadas	1879	1880	13.672	-89.053
	343080	Tecapa		1878		13.494	-88.502
	343100	San Miguel		2020	2020	13.434	-88.269
	343150	Yojoa, Lago		-7638		14.964	-87.983
	344010	Cosiguina		1859		12.98	-87.57
	344020	San Cristobal		2020	2021	12.702	-87.004
	344040	Telica		2020	2020	12.606	-86.84
	344070	Negro, Cerro	South flank (near Cristo Rey crater)	1999	1999	12.506	-86.702
	344080	Pilas, Las	El Hoyo	1954	1954	12.495	-86.688
	344090	Momotombo		2015	2016	12.423	-86.539
	344091	Apoyeque	Apoyeque	-50		12.242	-86.342
	344092	Nejapa-Miraflores	Nejapa maar	1060		12.12	-86.32
	344100	Masaya		2015	2021	11.985	-86.165
	344110	Mombacho		1850		11.826	-85.968
	344120	Concepcion		2009	2011	11.538	-85.622
	345020	Rincon de la Vieja		2020	2020	10.83	-85.324
	345030	Miravalles	SW flank (near Las Hornillas)	1946	1946	10.748	-85.153
	345033	Arenal	W flank & summit	1968	2010	10.463	-84.703
	345040	Poas		2019	2019	10.2	-84.233
	345050	Barva		1867		10.135	-84.1
	345060	Irazu	Upper NW flank	1994	1994	9.979	-83.852
	345070	Turrialba		2020	2020	10.025	-83.767
	346010	Baru		1550		8.808	-82.543
	351011	Romeral		-5390		5.203	-75.363
	351012	Bravo, Cerro		1720		5.091	-75.293
	351020	Ruiz, Nevado del		2014	2021	4.892	-75.324
	351021	Santa Isabel		-850		4.818	-75.365
	351030	Tolima, Nevado del		1943		4.658	-75.33
	351040	Machin		1180		4.487	-75.389
	351050	Huila, Nevado del	Upper SW side of Pico Central	2008	2012	2.93	-76.03
	351060	Purace		1977	1977	2.32	-76.4
	351070	Dona Juana		1897	1906	1.5	-76.936
	351080	Galeras	Summit crater	2012	2014	1.22	-77.37
	351090	Azufral		-930		1.08	-77.68
	351100	Cumbal		1926	1926	0.95	-77.87
	351110	Chiles-Cerro Negro	Volcano Uncertain: possibly Reventador	1936		0.817	-77.938
	352001	Soche		-6650		0.552	-77.58
	352002	Chachimbiro	NNE flank (Pitzantzi lava dome)	-3740		0.468	-78.287
	352003	Cuicocha		650		0.308	-78.364
	352004	Imbabura	Huarmi Imbabura	-5550		0.258	-78.183
	352006	Cayambe	Upper SE flank	1785	1786	0.029	-77.986
	352010	Reventador		2008	2021	-0.077	-77.656
	352011	Pululahua		290		0.038	-78.463
	352020	Guagua Pichincha		2009	2009	-0.171	-78.598
	352021	Atacazo	Ninahuilca Chico II dome	-320		-0.353	-78.617
	352022	Chacana	South part of caldera	1773		-0.375	-78.25
	352030	Antisana	Volcano Uncertain: possibly Reventador	1801	1802	-0.481	-78.141
	352031	Aliso	Pumayucu	-2450		-0.53	-78
	352040	Sumaco		1933		-0.538	-77.626
	352050	Cotopaxi		2015	2016	-0.677	-78.436
	352060	Quilotoa		1797		-0.85	-78.9
	352071	Chimborazo		550		-1.464	-78.815
	352080	Tungurahua		2011	2016	-1.467	-78.442
	352090	Sangay		2019	2021	-2.005	-78.341
	353010	Fernandina		2020	2020	-0.37	-91.55
	353011	Ecuador		1150		-0.02	-91.546
	353020	Wolf		2015	2015	0.02	-91.35
	353030	Darwin	Volcano Uncertain: more likely Darwin than Wolf, Alcedo	1813	1813	-0.18	-91.28
	353040	Alcedo	South caldera wall	1993		-0.43	-91.12
	353050	Negra, Sierra	Summit crater and NNW flank	2018	2018	-0.83	-91.17
	353060	Azul, Cerro	Summit and SE flank	2008	2008	-0.92	-91.408
	353070	Pinta		1928		0.58	-90.75
	353080	Marchena	West to SW caldera rim	1991	1991	0.33	-90.47
	353090	Santiago	SE flank	1904	1906	-0.22	-90.77
	354000	Quimsachata	Oroscocha	-4450		-14.176	-71.351
	354004	Andahua-Orcopampa		1913		-15.42	-72.33
	354005	Huambo	Cerro Keyocc	-700		-15.83	-72.13
	354006	Sabancaya		2016	2021	-15.787	-71.857
	354010	Misti, El		1985		-16.294	-71.409
	354020	Ubinas		2019	2019	-16.355	-70.903
	354030	Huaynaputina	Summit and south flank	1600	1600	-16.608	-70.85
	354031	Ticsani		1800		-16.755	-70.595
	354040	Tutupaca	Volcano Uncertain: reported from Tutupaca	1902	1902	-17.026	-70.372
	354050	Yucamane		-1320		-17.184	-70.196
	355010	Tacora		1937		-17.72	-69.77
	355011	Taapaca		-320		-18.1	-69.5
	355012	Parinacota	Parinacota 3 edifice	290		-18.166	-69.142
	355020	Guallatiri		1985		-18.42	-69.092
	355030	Isluga		1960		-19.15	-68.83
	355040	Irruputuncu		1995	1995	-20.73	-68.55
	355050	Olca-Paruma		1865	1867	-20.939	-68.413
	355070	San Pedro-San Pablo		1960		-21.888	-68.391
	355090	Putana		1972		-22.557	-67.853
	355100	Lascar		2015	2017	-23.37	-67.73
	355107	Pular		1990	1990	-24.188	-68.054
	355109	Socompa		-5250		-24.396	-68.246
	355110	Llullaillaco		1877		-24.72	-68.53
	355130	Ojos del Salado, Nevados		1993	1993	-27.109	-68.541
	355160	Aracar		1993		-24.29	-67.783
	355210	Blanco, Cerro		-2300		-26.789	-67.765
	357010	Tupungatito		1987	1987	-33.425	-69.797
	357020	San Jose		1960		-33.789	-69.895
	357021	Maipo		1912		-34.164	-69.832
	357030	Tinguiririca		1994	1994	-34.814	-70.352
	357040	Planchon-Peteroa		2018	2019	-35.223	-70.568
	357041	Infiernillo	Volcán Hoyo Colorado	-6890		-35.123	-69.9
	357050	Descabezado Grande	Upper NNE slope	1932	1933	-35.58	-70.75
	357060	Azul, Cerro	Quizapu	1967		-35.653	-70.761
	357061	Maule, Laguna del		-50		-36.058	-70.492
	357063	Longavi, Nevado de		-4890		-36.193	-71.161
	357066	Payun Matru	Escorial del Matru caldera	-5050		-36.422	-69.241
	357070	Chillan, Nevados de	Nicanor crater	2016	2021	-36.868	-71.378
	357072	Tromen		1822		-37.144	-70.033
	357080	Antuco		1972		-37.406	-71.349
	357090	Copahue	Agrio Crater	2020	2020	-37.856	-71.183
	357091	Callaqui		2012	2012	-37.92	-71.45
	357093	Tolhuaca	Pemehue	-4000		-38.31	-71.645
	357100	Lonquimay	NE flank (Navidad Crater)	1988	1990	-38.379	-71.586
	357110	Llaima	Summit and upper east flank	2008	2009	-38.692	-71.729
	357111	Sollipulli	North flank (Redondo, Chufquén)	1240		-38.97	-71.52
	357112	Caburgua-Huelemolle	Huelemolle and Caburgua cones	-5050		-39.25	-71.75
	357120	Villarrica		2014	2021	-39.42	-71.93
	357121	Quetrupillan		1872		-39.496	-71.722
	357122	Lanin		560		-39.637	-71.502
	357123	Huanquihue Group	Achín-Niellu (Volcán Escorial)	1750		-39.887	-71.58
	357130	Mocho-Choshuenco	El Mocho	1937		-39.927	-72.027
	357140	Carran-Los Venados	Mirador	1979	1979	-40.35	-72.07
	357150	Puyehue-Cordon Caulle	Cordón Caulle, N of the 1960 eruption fissure	2011	2012	-40.59	-72.117
	357153	Antillanca Volcanic Complex	Casablanca (Raihuén crater)	-230		-40.783	-72.15
	357160	Puntiagudo-Cordon Cenizos		1930		-40.969	-72.264
	358010	Osorno		1869		-41.105	-72.496
	358012	Cayutue-La Vigueria	La Viguería	-190		-41.25	-72.27
	358020	Calbuco		2015	2015	-41.33	-72.618
	358022	Yate	SE flank	1090		-41.755	-72.396
	358023	Hornopiren		1835		-41.874	-72.431
	358024	Apagado		-590		-41.88	-72.58
	358030	Huequi		1920		-42.377	-72.578
	358040	Michinmahuida		1915		-42.799	-72.445
	358041	Chaiten		2008	2011	-42.833	-72.646
	358049	Yanteles		1835		-43.497	-72.81
	358050	Corcovado		1835		-43.189	-72.794
	358052	Melimoyu		200		-44.08	-72.88
	358054	Mentolat		1710		-44.7	-73.08
	358056	Maca	SW flank (Bahía Pérez)	1560		-45.1	-73.17
	358057	Hudson, Cerro	S and SE edge of the caldera	2011	2011	-45.9	-72.97
	358060	Lautaro		1979		-49.019	-73.504
	358062	Aguilera		-1250		-50.33	-73.75
	358063	Reclus		1908		-50.964	-73.585
	358070	Burney, Monte		1910		-52.33	-73.4
	358080	Pali-Aike Volcanic Field		-5550		-52.082	-69.698
	358090	Fueguino		1820	1820	-54.97	-70.262
	360010	Saba	SW flank	1640		17.63	-63.23
	360020	Quill, The		250		17.478	-62.96
	360030	Liamuiga		1843		17.37	-62.8
	360050	Soufriere Hills		2005	2013	16.72	-62.18
	360060	Soufriere Guadeloupe	SE side of summit (Gouffre Tarissan)	1976	1977	16.044	-61.664
	360100	Trois Pitons, Morne	Micotrin?	920		15.37	-61.33
	360101	Watt, Morne	NE of Watt Mtn (Valley of Desolation)	1997	1997	15.307	-61.305
	360110	Plat Pays, Morne	Morne Patates	1270		15.255	-61.341
	360120	Pelee		1929	1932	14.809	-61.165
	360140	Qualibou	Sulphur Springs area	1766		13.83	-61.05
	360150	Soufriere St. Vincent		2020	2021	13.33	-61.18
	360160	Kick 'em Jenny		2017	2017	12.3	-61.64
	370010	Snaefellsjokull		200		64.8	-23.783
	370030	Ljosufjoll	Raudhalsar	960		64.9	-22.483
	371020	Reykjanes	Reykjaneshryggur (Eldeyjarbodi)	1970		63.817	-22.717
	371022	Eldey	Reykjaneshryggur (NE of Eldey)	1926		63.733	-23
	371030	Krysuvik-Trolladyngja	Tradarfjöll	1340		63.917	-22.067
	371040	Brennisteinsfjoll	Grafeldur (Selvogshraun)	1341		63.933	-21.783
	371050	Hengill	Nesjahraun, Reykjafellshraun	150		64.083	-21.416
	371060	Grimsnes	Kalfsholar	-3500		64.05	-20.883
	371070	Prestahnukur	Sköflungur	-3350		64.583	-20.666
	371080	Langjokull	Hallmundahraun	950		64.85	-19.7
	372010	Vestmannaeyjar	Heimaey (Eldfell)	1973	1973	63.416	-20.266
	372020	Eyjafjallajokull	ENE flank (Fimmvörduháls) and summit	2010	2010	63.633	-19.633
	372030	Katla	W, S, and E margins of caldera	1999	1999	63.633	-19.083
	372050	Torfajokull	N of caldera (Namshraun, Laugahraun)	1477		63.892	-19.122
	372070	Hekla	SW flank	2000	2000	63.983	-19.666
	373010	Grimsvotn	SW part of the caldera	2011	2011	64.416	-17.316
	373012	Thordarhyrna	Grímsvötn and Thordarhyrna	1902	1904	64.267	-17.617
	373030	Bardarbunga	Holuhraun	2014	2015	64.633	-17.516
	373050	Kverkfjoll		1968	1968	64.653	-16.647
	373060	Askja	North of Öskjuvatn lake (Vikraborgir)	1961	1961	65.033	-16.783
	373070	Fremrinamar		1823		65.416	-16.666
	373080	Krafla	Leirhnjúkur to 8.5 km north	1984	1984	65.715	-16.728
	373082	Heidarspordar	Threngslaborgir-Ludentsborgir crater row	-300		65.583	-16.817
	373090	Theistareykir	Storihver (Theistareykjahraun)	-900		65.833	-17.166
	373100	Tjornes Fracture Zone	Immediately north of Manareyjar Island	1867	1868	66.309	-17.118
	374010	Oraefajokull	Caldera, west flank (to 1100 m)	1727	1728	64.05	-16.633
	374020	Esjufjoll		1927		64.25	-16.583
	375010	Kolbeinsey Ridge		1838		66.67	-18.5
	376010	Jan Mayen	Beerenberg (NE flank, 0-200 m)	1985	1985	71.082	-8.155
	377020	East Gakkel Ridge at 85°E	East Gakkel Ridge	1999	1999	85.608	85.25
	381040	Pico Fracture Zone		1865		38.75	-38.08
	382001	Flores	Caldeira Comprida	-950		39.462	-31.216
	382010	Fayal	West flank (Capelinhos) and summit	1957	1958	38.6	-28.73
	382020	Pico	Off NW coast	1963		38.47	-28.4
	382030	San Jorge	Off SW coast	1964		38.65	-28.08
	382040	Graciosa	San Tamao	-1950		39.02	-27.97
	382050	Terceira	Serreta Ridge (submarine vent W of Terceira)	1998	2000	38.73	-27.32
	382070	Don Joao de Castro Bank	NW of Don Joao de Castro Bank	1997	1997	38.23	-26.63
	382080	Sete Cidades	Volcano Uncertain: submarine vent off Sao Miguel	1880		37.87	-25.78
	382081	Picos Volcanic System	Eastern part (SW of Fogo 1 cone)	1652	1652	37.78	-25.67
	382090	Agua de Pau	Lagoa do Fogo caldera	1564	1564	37.77	-25.47
	382100	Furnas	South end of caldera (Pico da Areia)	1630	1630	37.77	-25.32
	382110	Monaco Bank		1911		37.6	-25.88
	382120	Madeira	Paul da Serra	-4500		32.73	-16.97
	383010	La Palma	Teneguia	1971	1971	28.57	-17.83
	383020	Hierro	Submarine S flank, Tagaro cone	2011	2012	27.73	-18.03
	383030	Tenerife	NW rift zone (Chinyero)	1909	1909	28.271	-16.641
	383040	Gran Canaria	Bandama	40		28	-15.58
	383060	Lanzarote	Tao, Nuevo del Fuego, Tinguatón	1824	1824	29.03	-13.63
	384010	Fogo	WSW base of Pico	2014	2015	14.95	-24.35
	385030	Romanche Fracture Zone	0.58 S 15.83 W	1836		-0.433	-19.596
	385050	Ascension	South Sisters lava flow	1508		-7.95	-14.37
	385052	Walvis Ridge at 33°S	Seamount NW of Wüst seamount	2001	2002	-32.958	-5.22
	386010	Tristan da Cunha	North flank	1961	1962	-37.092	-12.28
	386011	Nightingale Island	Submarine SE flank	2004	2004	-37.42	-12.48
	386020	Bouvet		1956		-54.408	3.351
	390010	Buckle Island		1899		-66.78	163.25
	390013	Pleiades, The	NE of Mount Pleiones (Taygete Cone)	-1050		-72.67	165.5
	390015	Melbourne		1892		-74.35	164.7
	390020	Erebus		1972	2021	-77.53	167.17
	390022	Berlin		-8350		-76.05	-136
	390027	Takahe		-5550		-76.28	-112.08
	390028	Hudson Mountains	Webber Nunatak	1985		-74.33	-99.42
	390030	Deception Island		1987		-63.001	-60.652
	390031	Penguin Island	NE flank (Petrel Crater)	1905		-62.1	-57.93
	390041	Paulet		1850		-63.579	-55.78
	390050	Seal Nunataks Group	Dallman, Murdoch	1980		-65.03	-60.05
	390070	Southern Thule	South flank of Bellinghausen Island	1975		-59.442	-27.225
	390080	Bristol Island		2016	2016	-59.017	-26.533
	390081	Montagu Island	NW of Mount Belinda	2001	2007	-58.445	-26.374
	390090	Saunders	Summit crater	2014	2021	-57.8	-26.483
	390100	Candlemas Island	NW flank (Lucifer Hill)	1953		-57.08	-26.67
	390110	Hodson		1930		-56.712	-27.176
	390130	Zavodovski		2016	2016	-56.3	-27.57
	390140	Protector Seamounts		1962		-55.912	-28.167
	600000	Unknown Source	Tropical latitude (SP, 365 ppb sulfate)	1808		0	0

## Sheet: yearVOL
		Year	1	2	3	4	5	6	7	8	9	10	11	12	13	14	15	16	17	18	19	20	21	22	23	24	25	26	27	28	29	30	31	32	33	34	35	36		19	18	17	16	15	14	13	12	11	10
		1967	Ioto	Kelut	Karangetang	Io-Torishima	Karymsky	Kerinci	Tolbachik	Talang	Chikurachki	Semeru	Taal	Tangkuban Parahu	Tambora	Klyuchevskoy	Fukutoku-Oka-no-Ba	Izu-Oshima	Asosan	Slamet	Unnamed	Marapi	Farallon de Pajaros	Tolbachik	Kelut	Langila	Ebeko	Merapi
		1968	Kuchinoerabujima	Marapi	Lewotobi	Fukujin	Talang	Banua Wuhu	Awu	Kita-Ioto	Fukutoku-Oka-no-Ba	Izu-Oshima	Io-Torishima	Soputan	Klyuchevskoy	Tolbachik	Kelimutu	Nila	Mayon	Long Island	Etorofu-Yakeyama [Grozny Group]	Fukutoku-Oka-no-Ba	Kerinci	Taal	Batur	Izu-Oshima	Talang
		1969	Ioto	Lokon-Empung	Taal	Kanlaon	Langila	Klyuchevskoy	Tangkuban Parahu	Kerinci	Krakatau	Slamet	Didicas	Supply Reef	Ebulobo	Ebeko	Iya	Izu-Oshima	Ioto
		1970	Karangetang	Taal	Akita-Komagatake	Tolbachik	Marapi	Sorikmarapi	Lewotobi	Sirung	Etorofu-Yakeyama [Grozny Group]	Esmeralda Bank	Izu-Oshima	Kanlaon	Klyuchevskoy	Langila	Karymsky	Asosan	Kolokol Group	Soputan	Myojinsho	Izu-Oshima	Tolbachik	Batur
		1971	Klyuchevskoy	Sundoro	Raung	Kirishimayama	Ebeko	Klyuchevskoy	Iya	Kerinci	Soputan	Lokon-Empung	Izu-Oshima	Myojinsho	Bezymianny	Batur	Langila	Lewotobi	Merapi
		1972	Paluweh	Ritter Island	Merapi	Fukutoku-Oka-no-Ba	Kuchinoerabujima	Alaid	Krakatau	Fournaise, Piton de la	Unnamed	Zheltovsky	Tengger Caldera	Batur	Karangetang	Central Bismarck Sea																																Poas	Fernandina
		1973	Fukutoku-Oka-no-Ba	Iliwerung	Kuchinoerabujima	Paluweh	Tolbachik	Fukujin	Lokon-Empung	Slamet	Chikurachki	Kolokol Group	Marapi	Chachadake [Tiatia]	Alaid	Etorofu-Yakeyama [Grozny Group]	Raung	Fournaise, Piton de la	Long Island	Iliboleng	Nishinoshima	Batur	Langila	Asamayama	Dempo	Asosan	Etorofu-Yakeyama [Grozny Group]	Soputan
		1974	Karkar	Fukutoku-Oka-no-Ba	Ritter Island	Niigata-Yakeyama	Sumisujima	Chachadake [Tiatia]	Raung	Kuchinoerabujima	Slamet	Klyuchevskoy	Batur	Manam	Chokaisan	Izu-Oshima	Dempo	Karkar	Ioto
		1975	Kasuga 1	Lokon-Empung	Fournaise, Piton de la	Asosan	Izu-Torishima	Minami-Hiyoshi	Sumisujima	Nishinoshima	Sofugan	Tolbachik	Esmeralda Bank	Krakatau	Raung	Marapi
		1976	Minami-Hiyoshi	Fournaise, Piton de la	Sarychev Peak	Karangetang	Taal	Sumisujima	Fukujin	Fukutoku-Oka-no-Ba	Raung	Kuchinoerabujima	Batur	Bezymianny	Iliwerung	Kusatsu-Shiranesan	Minami-Hiyoshi	Ioto	Long Island
		1977	Azumayama	Mahawu	Fournaise, Piton de la	Sumisujima	Fukujin	Taal	Toya	Klyuchevskoy	Raung	Asosan	Bezymianny	Fournaise, Piton de la																																			Kick 'em Jenny
		1978	Shikotsu	Ioto	Nishinoshima	Bezymianny	Fukujin	Bulusan	Chachadake [Tiatia]	Krakatau	Kanlaon	Shikotsu	Mayon	Karangetang	Minami-Hiyoshi	Raung	Didicas
		1979	Bulusan	Ahyi	Ontakesan	Bezymianny	Krakatau	Myojinsho	Nikko	Peuet Sague	Asosan	Karangetang	Fournaise, Piton de la	Fukujin	Chirinkotan	Dieng Volcanic Complex	Kirishimayama	Bezymianny	Karkar
		1980	Myojinsho	Paluweh	Kuchinoerabujima	Asosan	Marion Island	Gamalama	Sheveluch	Bezymianny	Kanlaon	Nishinoshima	Gorely	Tengger Caldera	Ekarma	Bezymianny	Marapi	Karangetang	Krakatau	Ioto	Karkar
		1981	Klyuchevskoy	Alaid	Dieng Volcanic Complex	Asosan	Bezymianny	Chachadake [Tiatia]	Pagan	Alaid	Krakatau	Bulusan	Gamkonora	Shikotsu	Fournaise, Piton de la	Klyuchevskoy	Fukujin
		1982	Marapi	Fukujin	Ioto	Chirpoi	Iliboleng	Kusatsu-Shiranesan	Klyuchevskoy	Asamayama	Soputan	Myojinsho	Raung	Karangetang	Kita-Ioto	Asamayama	Nishinoshima	Esmeralda Bank	Galunggung	Alaid	Klyuchevskoy	Marapi	Ioto	Chachadake [Tiatia]	Fukujin
		1983	Tengger Caldera	Fournaise, Piton de la	Miyakejima	Tangkuban Parahu	Iliwerung	Gamalama	Kusatsu-Shiranesan	Colo	Asosan	Kita-Ioto	Nishinoshima	Marapi	Bulusan	Karangetang	Myojinsho	Iliboleng	Tengger Caldera	Niigata-Yakeyama	Asamayama
		1984	Kaitoku Seamount	Marapi	Suwanosejima	Mayon	Gorely	Lokon-Empung	Soputan	Tengger Caldera	Paluweh	Akan	Asosan	Sheveluch	Klyuchevskoy	Kaitoku Seamount	Bezymianny	Galunggung
		1985	Nishinoshima	Tangkuban Parahu	Kanlaon	Suwanosejima	Supply Reef	Raung	Klyuchevskoy	Sangeang Api	Tokachidake	Fournaise, Piton de la	Bezymianny	Sheveluch	Soputan	Karymsky	Kanlaon	Paluweh	Heard
		1986	Bezymianny	Klyuchevskoy	Chikurachki	Izu-Oshima	Myojinsho	Chirinkotan	Merapi	Sarychev Peak	Dieng Volcanic Complex	Talang	Sorikmarapi	Peuet Sague	Nishinoshima	Kaitoku Seamount	Klyuchevskoy	Kanlaon	Iliboleng	Alaid	Fukutoku-Oka-no-Ba	Sheveluch	Bezymianny	Lokon-Empung	Fukutoku-Oka-no-Ba
		1987	Ranakah	Izu-Oshima	Myojinsho	Ebeko	Iliboleng	Fukutoku-Oka-no-Ba	Pagan	Kita-Ioto	Fukutoku-Oka-no-Ba	Esmeralda Bank	Raung	Niigata-Yakeyama	Gamkonora	Kanlaon	Marapi
		1988	Tokachidake	Sheveluch	Pagan	Makian	Slamet	Kanlaon	Asosan	Banda Api	Lokon-Empung	Myojinsho	Bulusan	Pagan	Krakatau	Gamalama	Kita-Fukutokutai	Kikai	Suwanosejima	Akan
		1989	Kanlaon	Supply Reef	Bezymianny	Sumisujima	Kita-Ioto	Karangetang	Izu-Tobu	Etorofu-Yakeyama [Grozny Group]	Soputan	Niigata-Yakeyama	Sheveluch	Asosan	Ebeko	Sumisujima	Sarychev Peak	Kusatsu-Shiranesan
		1990	Kerinci	Unzendake	Izu-Oshima	Asamayama	Gamalama	Suwanosejima	Kelut	Bezymianny	Lewotobi	Fournaise, Piton de la	Raung	Sheveluch
		1991	Kirishimayama	Sumisujima	Iliboleng	Arjuno-Welirang	Raung	Fournaise, Piton de la	Fukutoku-Oka-no-Ba	Peuet Sague	Karangetang	Gamalama	Soputan	Lokon-Empung	Ontakesan	Lewotobi	Iliboleng	Klyuchevskoy	Pinatubo	Barren Island	Ranakah	Kanlaon	Ebeko	Avachinsky
		1992	McDonald Islands	Fukutoku-Oka-no-Ba	Krakatau	Klyuchevskoy	Fournaise, Piton de la	Sumisujima	Pinatubo	Kanlaon	Heard	Asosan	Pagan	Awu	Bezymianny	Minami-Hiyoshi	Klyuchevskoy	Merapi	Heard	Kanlaon
		1993	Long Island	Ioto	Bezymianny	Iliwerung	Sumisujima	Kanlaon	Ijen	Iliboleng	Gamalama	Taftan	Raung	Pinatubo	Mayon	Dieng Volcanic Complex	Pagan	Heard
		1994	Barren Island	Bulusan	Dempo	Klyuchevskoy	Ioto	Batur	Fukutoku-Oka-no-Ba	Sumisujima	Raung	Bezymianny	Rinjani	Asosan	Krakatau	Ijen	Sumisujima	Gamalama																															Tinguiririca
		1995	Boomerang Seamount	Fukutoku-Oka-no-Ba	Karangetang	Ruby	Kujusan	Bezymianny	Rinjani	Tengger Caldera	Raung	Sumisujima	Raung	Tengger Caldera	Yakedake
		1996	Dieng Volcanic Complex	Suwanosejima	McDonald Islands	Alaid	Akan	Klyuchevskoy	Karangetang	Adatarayama	Kerinci	Kanlaon	Bezymianny	Krakatau	Gamalama	Pagan	Ruang	Sorikmarapi	Hokkaido-Komagatake	Unzendake	Sumisujima	Minami-Hiyoshi	Akademia Nauk	Karymsky
		1997	Bezymianny	Sumisujima	Fukutoku-Oka-no-Ba	Niigata-Yakeyama	Klyuchevskoy	Alaid	Akita-Yakeyama	Kikai	Sangeang Api	Akita-Yakeyama	Bezymianny	Raung	Krakatau	Kita-Ioto	Sheveluch
		1998	Ibu	Akan	Kerinci	Kita-Ioto	Sumisujima	Hokkaido-Komagatake	Fukutoku-Oka-no-Ba	Klyuchevskoy	Karangetang	Kerinci	Batur	Bezymianny	Sheveluch	Kita-Ioto	Kikai	Peuet Sague	Niigata-Yakeyama	Fournaise, Piton de la
		1999	Moyorodake [Medvezhia]	Ioto	Fukutoku-Oka-no-Ba	Kita-Ioto	Sheveluch	Raung	Fournaise, Piton de la	Ijen	Mayon	Suwanosejima	Iliwerung	Slamet	Marapi	Sheveluch	Lewotobi	Kerinci	Karangetang	Batur	Peuet Sague	Bezymianny	Krakatau	Klyuchevskoy	Suwanosejima
		2000	Peuet Sague	Suwanosejima	Tengger Caldera	Sumisujima	Kita-Ioto	Kikai	Hokkaido-Komagatake	Ijen	Kaba	Klyuchevskoy	Fukutoku-Oka-no-Ba	Bezymianny	Slamet	Mayon	Raung	Mutnovsky	Miyakejima	Fournaise, Piton de la	Manam	Krakatau	Soputan	Lokon-Empung	Toya	Mutnovsky	Bezymianny	Marapi	Heard	Suwanosejima	Fournaise, Piton de la	Klyuchevskoy	Kita-Ioto	Barren Island	Kikai
		2001	Bezymianny	Karymsky	Sumisujima	Kita-Fukutokutai	Fukutoku-Oka-no-Ba	Kita-Ioto	Avachinsky	Talang	Ioto	Bezymianny	Krakatau	Manam	Fournaise, Piton de la	Ibu	Kerinci	McDonald Islands	Ahyi	Marapi	Fournaise, Piton de la	Nishinoshima	Inielika	Miyakejima	Mayon
		2002	Bezymianny	Lokon-Empung	Fukutoku-Oka-no-Ba	Kanlaon	Klyuchevskoy	Fournaise, Piton de la	Papandayan	Manam	Lewotobi	Mayon	Ruang	Sumisujima	Izu-Torishima	Ritter Island	Ijen	Raung	Langila	Kikai	Klyuchevskoy	Kita-Ioto	Lokon-Empung	Chikurachki	Manam	Fournaise, Piton de la
		2003	Sumisujima	Kita-Ioto	Manam	Mayon	Lokon-Empung	Gamalama	Bezymianny	Dieng Volcanic Complex	Asosan	NW Rota-1	Leroboleng	Heard	Fournaise, Piton de la	Lewotobi	Manam	Anatahan	Chikurachki	Mayon	Kita-Ioto	Kanlaon	Kikai	Asamayama
		2004	Miyakejima	Langila	McDonald Islands	Manam	Suwanosejima	Soputan	Rinjani	Klyuchevskoy	Asamayama	Marapi	Chirinkotan	Egon	Marion Island	Kerinci	Tengger Caldera	Ioto	Mayon	Awu	Ibu	Fournaise, Piton de la	Raung	Anatahan	Karangetang	Kikai	Tokachidake	Egon	Langila	Bezymianny	Asosan
		2005	Soputan	Ambang	Bezymianny	Fournaise, Piton de la	Fukutoku-Oka-no-Ba	Mayon	Raung	McDonald Islands	Fukutoku-Oka-no-Ba	Kolokol Group	Barren Island	Langila	Soputan	Asosan	Miyakejima	Talang	Chikurachki	Sumisujima	Fournaise, Piton de la	Egon	Ebeko	Kanlaon	Klyuchevskoy
		2006	Soputan	Pagan	Ritter Island	Bulusan	Dempo	Talang	Miyakejima	Langila	Fournaise, Piton de la	Mayon	Karangetang	Tara, Batu	Kanlaon	Bezymianny	Akan	Bulusan	Anatahan	Merapi	Heard	Mayon	Miyakejima
		2007	Talang	Anatahan	Krakatau	Kelut	Kerinci	Gamalama	Chikurachki	Raung	Gamkonora	Soputan	Ritter Island	Bezymianny	Ontakesan	Talang	Chikurachki	Klyuchevskoy	Tara, Batu
		2008	Koryaksky	Karangetang	Akan	Klyuchevskoy	Fournaise, Piton de la	Kirishimayama	Mayon	Asamayama	Chikurachki	Bezymianny	Raung	Soputan	Merapi	Barren Island	Gamalama	Miyakejima	Egon	Ibu	Kerinci	Karangetang	Asosan	Miyakejima																				Llaima	Huila, Nevado del	Poas	Guagua Pichincha	Masaya	Chaiten
		2009	Bezymianny	Kirishimayama	Fournaise, Piton de la	Dieng Volcanic Complex	Langila	Mayon	Kolokol Group	Klyuchevskoy	Sarychev Peak	Rinjani	Sangeang Api	Karkar	Slamet	Pagan	Miyakejima	Kerinci	Krakatau	Ebeko	Asamayama	Dieng Volcanic Complex	Dempo																										Poas
		2010	Tengger Caldera	Kizimen	Bulusan	Merapi	Krakatau	Fournaise, Piton de la	Sarychev Peak	Barren Island	Sinabung	Manam	Karangetang	Ebeko	Ekarma	Ioto	Gorely	South Sarigan Seamount	Bezymianny	Pagan	Miyakejima	Kirishimayama	Karkar	Fukutoku-Oka-no-Ba	Semeru
		2011	Kerinci	Gamalama	Klyuchevskoy	Marapi	Krakatau	Langila	Soputan	Lokon-Empung	Asosan	Semeru	Pagan	Klyuchevskoy	Karangetang	Lokon-Empung	Kirishimayama																														Turrialba	Planchon-Peteroa	Telica
		2012	Langila	Tolbachik	Chirpoi	Pagan	Raung	Paluweh	Alaid	Marapi	Gamalama	Lokon-Empung	Heard	Klyuchevskoy	Soputan	Etorofu-Yakeyama [Grozny Group]	Langila	Karangetang	Sirung	Marapi	Ioto	Karkar	Lewotolok																									Callaqui	Turrialba
		2013	Nishinoshima	Merapi	Langila	Zhupanovsky	Barren Island	Tangkuban Parahu	Sinabung	Iliwerung	Klyuchevskoy	Ketoi	Izu-Torishima	Raung	Chirinkotan	Semeru	Kikai	Kerinci	Mayon	Tangkuban Parahu	Barren Island	Etorofu-Yakeyama [Grozny Group]	Mariana Back-Arc Segment at 15.5°N	Karkar	Gamkonora
		2014	Gamalama	Sinarka	Raung	Chirinkotan	Lewotobi	Ontakesan	Asosan	Mayon	Kuchinoerabujima	Manam	Fournaise, Piton de la	Karangetang	Zhupanovsky	Sangeang Api	Ahyi	Semeru	Krakatau	Karkar	Merapi	Slamet	Kelut	Karangetang	Marapi	Asosan	Raung
		2015	Kanlaon	Marapi	Tengger Caldera	Rinjani	Langila	Alaid	Lokon-Empung	Klyuchevskoy	Gamalama	Sirung	Hakoneyama	Cereme	Asamayama	Kuchinoerabujima	Lokon-Empung	Bulusan	Chikurachki	Fournaise, Piton de la	Soputan	Klyuchevskoy																						Sangay	San Cristobal	Turrialba	Calbuco	Telica	Wolf
		2016	Chirinkotan	Zhupanovsky	Kerinci	Ebeko	Asosan	Karymsky	Fournaise, Piton de la	Gamalama	Rinjani	Chikurachki	Bulusan	Fournaise, Piton de la	Kerinci	Chikurachki	Bulusan	Soputan
		2017	Kanlaon	Agung	Dempo	Sarychev Peak	Kirishimayama	Kerinci	Sangeang Api	Fournaise, Piton de la	Bulusan	Marapi	Karymsky	Karangetang	Dieng Volcanic Complex	Nishinoshima	Aira	Kambalny	Ebulobo	Krakatau	Fournaise, Piton de la	Barren Island
		2018	Karangetang	Kuchinoerabujima	Gamalama	Soputan	Barren Island	Ketoi	Sarychev Peak	Alaid	Nishinoshima	Mayotte	Krakatau	Merapi	Karymsky	Marapi	Kerinci	Fournaise, Piton de la	Dieng Volcanic Complex	Kirishimayama	Karangetang	Kusatsu-Shiranesan	Mayon	Kadovar
		2019	Nishinoshima	Kikai	Asamayama	Tangkuban Parahu	Raikoke	Fournaise, Piton de la	Sarychev Peak	Asosan	Klyuchevskoy	Fournaise, Piton de la	Tengger Caldera	Karymsky	Sinabung
		2020	Merapi	Tengger Caldera	Fournaise, Piton de la	Lewotolok	Kikai	Kuchinoerabujima	Sinabung	Raung	Kikai	Karymsky	Soputan	Fournaise, Piton de la	Taal	Kuchinoerabujima
[truncated: 10 more columns]

## Sheet: WA
		Year	1	2	3	4	5	6	7	8	9	10	11	12	13	14	15	16	17	18	19	20	21	22	23	24	25	26	27	28	29	30	31	32	33	34	35	36
		1967	24.751	-7.93	2.781	27.881	54.049	-1.697	55.832	-0.979	50.324	-8.108	14.002	-6.77	-8.25	56.056	24.285	34.724	32.884	-7.242	45.022	-0.38	20.546	55.832	-7.93	-5.525	50.686	-7.54
		1968	30.443	-0.38	-8.542	21.93	-0.979	3.138	3.689	25.424	24.285	34.724	27.881	1.112	56.056	55.832	-8.77	-6.73	13.257	-5.358	45.012	24.285	-1.697	14.002	-8.242	34.724	-0.979
		1969	24.751	1.358	14.002	10.412	-5.525	56.056	-6.77	-1.697	-6.102	-7.242	19.077	20.13	-8.817	50.686	-8.891	34.724	24.751
		1970	2.781	14.002	39.761	55.832	-0.38	0.686	-8.542	-8.508	45.012	15	34.724	10.412	56.056	-5.525	54.049	32.884	46.042	1.112	31.888	34.724	55.832	-8.242
		1971	56.056	-7.3	-8.119	31.934	50.686	56.056	-8.891	-1.697	1.112	1.358	34.724	31.888	55.972	-8.242	-5.525	-8.542	-7.54
		1972	-8.32	-5.519	-7.54	24.285	30.443	50.861	-6.102	-21.244	46.47	51.577	-7.942	-8.242	2.781	-3.03
		1973	24.285	-8.53	30.443	-8.32	55.832	21.93	1.358	-7.242	50.324	46.042	-0.38	44.353	50.861	45.012	-8.119	-21.244	-5.358	-8.342	27.247	-8.242	-5.525	36.406	-4.016	32.884	45.012	1.112
		1974	-4.649	24.285	-5.519	36.921	31.44	44.353	-8.119	30.443	-7.242	56.056	-8.242	-4.08	39.099	34.724	-4.016	-4.649	24.751
		1975	21.765	1.358	-21.244	32.884	30.484	23.5	31.44	27.247	29.794	55.832	15	-6.102	-8.119	-0.38
		1976	23.5	-21.244	48.092	2.781	14.002	31.44	21.93	24.285	-8.119	30.443	-8.242	55.972	-8.53	36.618	23.5	24.751	-5.358
		1977	37.735	1.352	-21.244	31.44	21.93	14.002	42.544	56.056	-8.119	32.884	55.972	-21.244
		1978	42.688	24.751	27.247	55.972	21.93	12.769	44.353	-6.102	10.412	42.688	13.257	2.781	23.5	-8.119	19.077
		1979	12.769	20.42	35.893	55.972	-6.102	31.888	23.078	4.903	32.884	2.781	-21.244	21.93	48.98	-7.2	31.934	55.972	-4.649
		1980	31.888	-8.32	30.443	32.884	-46.9	0.8	56.653	55.972	10.412	27.247	52.559	-7.942	48.958	55.972	-0.38	2.781	-6.102	24.751	-4.649
		1981	56.056	50.861	-7.2	32.884	55.972	44.353	18.13	50.861	-6.102	12.769	1.38	42.688	-21.244	56.056	21.93
		1982	-0.38	21.93	24.751	46.532	-8.342	36.618	56.056	36.406	1.112	31.888	-8.119	2.781	25.424	36.406	27.247	15	-7.25	50.861	56.056	-0.38	24.751	44.353	21.93
		1983	-7.942	-21.244	34.094	-6.77	-8.53	0.8	36.618	-0.162	32.884	25.424	27.247	-0.38	12.769	2.781	31.888	-8.342	-7.942	36.921	36.406
		1984	26.127	-0.38	29.638	13.257	52.559	1.358	1.112	-7.942	-8.32	43.384	32.884	56.653	56.056	26.127	55.972	-7.25
		1985	27.247	-6.77	10.412	29.638	20.13	-8.119	56.056	-8.2	43.418	-21.244	55.972	56.653	1.112	54.049	10.412	-8.32	-53.106
		1986	55.972	56.056	50.324	34.724	31.888	48.98	-7.54	48.092	-7.2	-0.979	0.686	4.903	27.247	26.127	56.056	10.412	-8.342	50.861	24.285	56.653	55.972	1.358	24.285
		1987	-8.62	34.724	31.888	50.686	-8.342	24.285	18.13	25.424	24.285	15	-8.119	36.921	1.38	10.412	-0.38
		1988	43.418	56.653	18.13	0.32	-7.242	10.412	32.884	-4.523	1.358	31.888	12.769	18.13	-6.102	0.8	24.417	30.793	29.638	43.384
		1989	10.412	20.13	55.972	31.44	25.424	2.781	34.9	45.012	1.112	36.921	56.653	32.884	50.686	31.44	48.092	36.618
		1990	-1.697	32.761	34.724	36.406	0.8	29.638	-7.93	55.972	-8.542	-21.244	-8.119	56.653
		1991	31.934	31.44	-8.342	-7.733	-8.119	-21.244	24.285	4.903	2.781	0.8	1.112	1.358	35.893	-8.542	-8.342	56.056	15.13	12.278	-8.62	10.412	50.686	53.256
		1992	-53.03	24.285	-6.102	56.056	-21.244	31.44	15.13	10.412	-53.106	32.884	18.13	3.689	55.972	23.5	56.056	-7.54	-53.106	10.412
		1993	-5.358	24.751	55.972	-8.53	31.44	10.412	-8.058	-8.342	0.8	28.6	-8.119	15.13	13.257	-7.2	18.13	-53.106
		1994	12.278	12.769	-4.016	56.056	24.751	-8.242	24.285	31.44	-8.119	55.972	-8.42	32.884	-6.102	-8.058	31.44	0.8
		1995	-37.721	24.285	2.781	15.62	33.086	55.972	-8.42	-7.942	-8.119	31.44	-8.119	-7.942	36.227
		1996	-7.2	29.638	-53.03	50.861	43.384	56.056	2.781	37.647	-1.697	10.412	55.972	-6.102	0.8	18.13	2.3	0.686	42.063	32.761	31.44	23.5	53.98	54.049
		1997	55.972	31.44	24.285	36.921	56.056	50.861	39.964	30.793	-8.2	39.964	55.972	-8.119	-6.102	25.424	56.653
		1998	1.488	43.384	-1.697	25.424	31.44	42.063	24.285	56.056	2.781	-1.697	-8.242	55.972	56.653	25.424	30.793	4.903	36.921	-21.244
		1999	45.389	24.751	24.285	25.424	56.653	-8.119	-21.244	-8.058	13.257	29.638	-8.53	-7.242	-0.38	56.653	-8.542	-1.697	2.781	-8.242	4.903	55.972	-6.102	56.056	29.638
		2000	4.903	29.638	-7.942	31.44	25.424	30.793	42.063	-8.058	-3.522	56.056	24.285	55.972	-7.242	13.257	-8.119	52.449	34.094	-21.244	-4.08	-6.102	1.112	1.358	42.544	52.449	55.972	-0.38	-53.106	29.638	-21.244	56.056	25.424	12.278	30.793
		2001	55.972	54.049	31.44	24.417	24.285	25.424	53.256	-0.979	24.751	55.972	-6.102	-4.08	-21.244	1.488	-1.697	-53.03	20.42	-0.38	-21.244	27.247	-8.73	34.094	13.257
		2002	55.972	1.358	24.285	10.412	56.056	-21.244	-7.32	-4.08	-8.542	13.257	2.3	31.44	30.484	-5.519	-8.058	-8.119	-5.525	30.793	56.056	25.424	1.358	50.324	-4.08	-21.244
		2003	31.44	25.424	-4.08	13.257	1.358	0.8	55.972	-7.2	32.884	14.601	-8.365	-53.106	-21.244	-8.542	-4.08	16.35	50.324	13.257	25.424	10.412	30.793	36.406
		2004	34.094	-5.525	-53.03	-4.08	29.638	1.112	-8.42	56.056	36.406	-0.38	48.98	-8.676	-46.9	-1.697	-7.942	24.751	13.257	3.689	1.488	-21.244	-8.119	16.35	2.781	30.793	43.418	-8.676	-5.525	55.972	32.884
		2005	1.112	0.75	55.972	-21.244	24.285	13.257	-8.119	-53.03	24.285	46.042	12.278	-5.525	1.112	32.884	34.094	-0.979	50.324	31.44	-21.244	-8.676	50.686	10.412	56.056
		2006	1.112	18.13	-5.519	12.769	-4.016	-0.979	34.094	-5.525	-21.244	13.257	2.781	-7.791	10.412	55.972	43.384	12.769	16.35	-7.54	-53.106	13.257	34.094
		2007	-0.979	16.35	-6.102	-7.93	-1.697	0.8	50.324	-8.119	1.38	1.112	-5.519	55.972	35.893	-0.979	50.324	56.056	-7.791
		2008	53.321	2.781	43.384	56.056	-21.244	31.934	13.257	36.406	50.324	55.972	-8.119	1.112	-7.54	12.278	0.8	34.094	-8.676	1.488	-1.697	2.781	32.884	34.094
		2009	55.972	31.934	-21.244	-7.2	-5.525	13.257	46.042	56.056	48.092	-8.42	-8.2	-4.649	-7.242	18.13	34.094	-1.697	-6.102	50.686	36.406	-7.2	-4.016
		2010	-7.942	55.131	12.769	-7.54	-6.102	-21.244	48.092	12.278	3.17	-4.08	2.781	50.686	48.958	24.751	52.559	16.58	55.972	18.13	34.094	31.934	-4.649	24.285	-8.108
		2011	-1.697	0.8	56.056	-0.38	-6.102	-5.525	1.112	1.358	32.884	-8.108	18.13	56.056	2.781	1.358	31.934
		2012	-5.525	55.832	46.532	18.13	-8.119	-8.32	50.861	-0.38	0.8	1.358	-53.106	56.056	1.112	45.012	-5.525	2.781	-8.508	-0.38	24.751	-4.649	-8.274
		2013	27.247	-7.54	-5.525	53.589	12.278	-6.77	3.17	-8.53	56.056	47.35	30.484	-8.119	48.98	-8.108	30.793	-1.697	13.257	-6.77	12.278	45.012	15.406	-4.649	1.38
		2014	0.8	48.873	-8.119	48.98	-8.542	35.893	32.884	13.257	30.443	-4.08	-21.244	2.781	53.589	-8.2	20.42	-8.108	-6.102	-4.649	-7.54	-7.242	-7.93	2.781	-0.38	32.884	-8.119
		2015	10.412	-0.38	-7.942	-8.42	-5.525	50.861	1.358	56.056	0.8	-8.508	35.233	-6.895	36.406	30.443	1.358	12.769	50.324	-21.244	1.112	56.056
		2016	48.98	53.589	-1.697	50.686	32.884	54.049	-21.244	0.8	-8.42	50.324	12.769	-21.244	-1.697	50.324	12.769	1.112
		2017	10.412	-8.343	-4.016	48.092	31.934	-1.697	-8.2	-21.244	12.769	-0.38	54.049	2.781	-7.2	27.247	31.593	51.306	-8.817	-6.102	-21.244	12.278
		2018	2.781	30.443	0.8	1.112	12.278	47.35	48.092	50.861	27.247	-12.83	-6.102	-7.54	54.049	-0.38	-1.697	-21.244	-7.2	31.934	2.781	36.618	13.257	-3.608
		2019	27.247	30.793	36.406	-6.77	48.292	-21.244	48.092	32.884	56.056	-21.244	-7.942	54.049	3.17
		2020	-7.54	-7.942	-21.244	-8.274	30.793	30.443	3.17	-8.119	30.793	54.049	1.112	-21.244	14.002	30.443

## Sheet: WO
		Year	1	2	3	4	5	6	7	8	9	10	11	12	13	14	15	16	17	18	19	20	21	22	23	24	25	26	27	28	29	30	31	32	33	34	35	36
		1967	141.289	112.308	125.407	128.223	159.443	101.264	160.326	100.681	155.461	112.922	120.993	107.6	118	160.642	141.481	139.394	131.104	109.208	147.019	100.474	144.893	160.326	112.308	148.42	156.014	110.446
		1968	130.217	100.474	122.775	143.47	100.681	125.491	125.447	141.284	141.481	139.394	128.223	124.737	160.642	160.326	121.82	129.5	123.685	147.12	147.871	141.481	101.264	120.993	115.375	139.394	100.681
		1969	141.289	124.792	120.993	123.132	148.42	160.642	107.6	101.264	105.423	109.208	122.202	145.1	121.191	156.014	121.641	139.394	141.289
		1970	125.407	120.993	140.799	160.326	100.474	99.539	122.775	124.13	147.871	145.25	139.394	123.132	160.642	148.42	159.443	131.104	150.083	124.737	139.918	139.394	160.326	115.375
		1971	160.642	109.992	114.056	130.862	156.014	160.642	121.641	101.264	124.737	124.792	139.394	139.918	160.595	115.375	148.42	122.775	110.446
		1972	121.708	148.115	110.446	141.481	130.217	155.565	105.423	55.708	151.28	157.328	112.95	115.375	125.407	147.78
		1973	141.481	123.57	130.217	121.708	160.326	143.47	124.792	109.208	155.461	150.083	100.474	146.252	155.565	147.871	114.056	55.708	147.12	123.258	140.874	115.375	148.42	138.523	103.121	131.104	147.871	124.737
		1974	145.964	141.481	148.115	138.036	140.051	146.252	114.056	130.217	109.208	160.642	115.375	145.037	140.049	139.394	103.121	145.964	141.289
		1975	143.71	124.792	55.708	131.104	140.303	141.935	140.051	140.874	140.342	160.326	145.25	105.423	114.056	100.474
		1976	141.935	55.708	153.2	125.407	120.993	140.051	143.47	141.481	114.056	130.217	115.375	160.595	123.57	138.528	141.935	141.289	147.12
		1977	140.244	124.865	55.708	140.051	143.47	120.993	140.839	160.642	114.056	131.104	160.595	55.708
		1978	141.38	141.289	140.874	160.595	143.47	124.056	146.252	105.423	123.132	141.38	123.685	125.407	141.935	114.056	122.202
		1979	124.056	145.03	137.48	160.595	105.423	139.918	142.326	96.289	131.104	125.407	55.708	143.47	153.48	109.879	130.862	160.595	145.964
		1980	139.918	121.708	130.217	131.104	37.75	127.33	161.36	160.595	123.132	140.874	158.03	112.95	153.93	160.595	100.474	125.407	105.423	141.289	145.964
		1981	160.642	155.565	109.879	131.104	160.595	146.252	145.8	155.565	105.423	124.056	127.53	141.38	55.708	160.642	143.47
		1982	100.474	143.47	141.289	150.871	123.258	138.528	160.642	138.523	124.737	139.918	114.056	125.407	141.284	138.523	140.874	145.25	108.058	155.565	160.642	100.474	141.289	146.252	143.47
		1983	112.95	55.708	139.526	107.6	123.57	127.33	138.528	121.601	131.104	141.284	140.874	100.474	124.056	125.407	139.918	123.258	112.95	138.036	138.523
		1984	141.102	100.474	129.714	123.685	158.03	124.792	124.737	112.95	121.708	144.013	131.104	161.36	160.642	141.102	160.595	108.058
		1985	140.874	107.6	123.132	129.714	145.1	114.056	160.642	119.07	142.686	55.708	160.595	161.36	124.737	159.443	123.132	121.708	73.513
		1986	160.595	160.642	155.461	139.394	139.918	153.48	110.446	153.2	109.879	100.681	99.539	96.289	140.874	141.102	160.642	123.132	123.258	155.565	141.481	161.36	160.595	124.792	141.481
		1987	120.52	139.394	139.918	156.014	123.258	141.481	145.8	141.284	141.481	145.25	114.056	138.036	127.53	123.132	100.474
		1988	142.686	161.36	145.8	127.4	109.208	123.132	131.104	129.881	124.792	139.918	124.056	145.8	105.423	127.33	141.417	130.305	129.714	144.013
		1989	123.132	145.1	160.595	140.051	141.284	125.407	139.098	147.871	124.737	138.036	161.36	131.104	156.014	140.051	153.2	138.528
		1990	101.264	130.299	139.394	138.523	127.33	129.714	112.308	160.595	122.775	55.708	114.056	161.36
		1991	130.862	140.051	123.258	112.575	114.056	55.708	141.481	96.289	125.407	127.33	124.737	124.792	137.48	122.775	123.258	160.642	120.35	93.858	120.52	123.132	156.014	158.836
		1992	72.6	141.481	105.423	160.642	55.708	140.051	120.35	123.132	73.513	131.104	145.8	125.447	160.595	141.935	160.642	110.446	73.513	123.132
		1993	147.12	141.289	160.595	123.57	140.051	123.132	114.242	123.258	127.33	61.13	114.056	120.35	123.685	109.879	145.8	73.513
		1994	93.858	124.056	103.121	160.642	141.289	115.375	141.481	140.051	114.056	160.595	116.47	131.104	105.423	114.242	140.051	127.33
		1995	77.825	141.481	125.407	145.57	131.249	160.595	116.47	112.95	114.056	140.051	114.056	112.95	137.587
		1996	109.879	129.714	72.6	155.565	144.013	160.642	125.407	140.281	101.264	123.132	160.595	105.423	127.33	145.8	125.37	99.539	140.677	130.299	140.051	141.935	159.45	159.443
		1997	160.595	140.051	141.481	138.036	160.642	155.565	140.757	130.305	119.07	140.757	160.595	114.056	105.423	141.284	161.36
		1998	127.63	144.013	101.264	141.284	140.051	140.677	141.481	160.642	125.407	101.264	115.375	160.595	161.36	141.284	130.305	96.289	138.036	55.708
		1999	148.838	141.289	141.481	141.284	161.36	114.056	55.708	114.242	123.685	129.714	123.57	109.208	100.474	161.36	122.775	101.264	125.407	115.375	96.289	160.595	105.423	160.642	129.714
		2000	96.289	129.714	112.95	140.051	141.284	130.305	140.677	114.242	102.615	160.642	141.481	160.595	109.208	123.685	114.056	158.196	139.526	55.708	145.037	105.423	124.737	124.792	140.839	158.196	160.595	100.474	73.513	129.714	55.708	160.642	141.284	93.858	130.305
		2001	160.595	159.443	140.051	141.417	141.481	141.284	158.836	100.681	141.289	160.595	105.423	145.037	55.708	127.63	101.264	72.6	145.03	100.474	55.708	140.874	120.98	139.526	123.685
		2002	160.595	124.792	141.481	123.132	160.642	55.708	107.73	145.037	122.775	123.685	125.37	140.051	140.303	148.115	114.242	114.056	148.42	130.305	160.642	141.284	124.792	155.461	145.037	55.708
		2003	140.051	141.284	145.037	123.685	124.792	127.33	160.595	109.879	131.104	144.775	122.833	73.513	55.708	122.775	145.037	145.67	155.461	123.685	141.284	123.132	130.305	138.523
		2004	139.526	148.42	72.6	145.037	129.714	124.737	116.47	160.642	138.523	100.474	153.48	122.455	37.75	101.264	112.95	141.289	123.685	125.447	127.63	55.708	114.056	145.67	125.407	130.305	142.686	122.455	148.42	160.595	131.104
		2005	124.737	124.42	160.595	55.708	141.481	123.685	114.056	72.6	141.481	150.083	93.858	148.42	124.737	131.104	139.526	100.681	155.461	140.051	55.708	122.455	156.014	123.132	160.642
		2006	124.737	145.8	148.115	124.056	103.121	100.681	139.526	148.42	55.708	123.685	125.407	123.585	123.132	160.595	144.013	124.056	145.67	110.446	73.513	123.685	139.526
		2007	100.681	145.67	105.423	112.308	101.264	127.33	155.461	114.056	127.53	124.737	148.115	160.595	137.48	100.681	155.461	160.642	123.585
		2008	158.712	125.407	144.013	160.642	55.708	130.862	123.685	138.523	155.461	160.595	114.056	124.737	110.446	93.858	127.33	139.526	122.455	127.63	101.264	125.407	131.104	139.526
		2009	160.595	130.862	55.708	109.879	148.42	123.685	150.083	160.642	153.2	116.47	119.07	145.964	109.208	145.8	139.526	101.264	105.423	156.014	138.523	109.879	103.121
		2010	112.95	160.32	124.056	110.446	105.423	55.708	153.2	93.858	98.392	145.037	125.407	156.014	153.93	141.289	158.03	145.78	160.595	145.8	139.526	130.862	145.964	141.481	112.922
		2011	101.264	127.33	160.642	100.474	105.423	148.42	124.737	124.792	131.104	112.922	145.8	160.642	125.407	124.792	130.862
		2012	148.42	160.326	150.871	145.8	114.056	121.708	155.565	100.474	127.33	124.792	73.513	160.642	124.737	147.871	148.42	125.407	124.13	100.474	141.289	145.964	123.508
		2013	140.874	110.446	148.42	159.15	93.858	107.6	98.392	123.57	160.642	152.475	140.303	114.056	153.48	112.922	130.305	101.264	123.685	107.6	93.858	147.871	144.506	145.964	127.53
		2014	127.33	154.182	114.056	153.48	122.775	137.48	131.104	123.685	130.217	145.037	55.708	125.407	159.15	119.07	145.03	112.922	105.423	145.964	110.446	109.208	112.308	125.407	100.474	131.104	114.056
		2015	123.132	100.474	112.95	116.47	148.42	155.565	124.792	160.642	127.33	124.13	139.021	108.408	138.523	130.217	124.792	124.056	155.461	55.708	124.737	160.642
		2016	153.48	159.15	101.264	156.014	131.104	159.443	55.708	127.33	116.47	155.461	124.056	55.708	101.264	155.461	124.056	124.737
		2017	123.132	115.508	103.121	153.2	130.862	101.264	119.07	55.708	124.056	100.474	159.443	125.407	109.879	140.874	130.657	156.875	121.191	105.423	55.708	93.858
		2018	125.407	130.217	127.33	124.737	93.858	152.475	153.2	155.565	140.874	45.17	105.423	110.446	159.443	100.474	101.264	55.708	109.879	130.862	125.407	138.528	123.685	144.588
		2019	140.874	130.305	138.523	107.6	153.25	55.708	153.2	131.104	160.642	55.708	112.95	159.443	98.392
		2020	110.446	112.95	55.708	123.508	130.305	130.217	98.392	114.056	130.305	159.443	124.737	55.708	120.993	130.217

## Sheet: EA
		Year	1	2	3	4	5	6	7	8	9	10	11	12	13	14	15	16	17	18	19
		1967	-35.653	9.979	-35.223	10.2
		1968	12.506	10.463	10.2	-33.425	-0.92	-0.37	-0.37
		1969	12.506	10.83	-16.355	-23.37	10.2	10.83	12.606
		1970	10.83	10.2
		1971	-38.692	-39.42	28.57	13.33	-45.9	12.702	12.506
		1972	-41.33	-0.077	12.3	-49.019	-36.868	-37.406	-23.37	-22.557	0.792	-0.37	10.2
		1973	11.538	-0.37	-0.077	0.02	-36.868	1.22
		1974	10.2	12.3	-23.37	1.22	9.979
		1975	12.606
		1976	12.606	12.702	16.044	10.2	12.702	-0.077
		1977	10.2	12.3	12.702	10.2	11.538	-0.37	2.32	9.979	-39.42	12.3
		1978	10.2	-0.37	-49.019	11.538
		1979	-0.83	-38.692	10.2	-40.35	13.33	-49.019	-0.92
		1980	10.2	-37.92	10.2	-39.42	-33.425
		1981	12.606	-0.171	-0.37	10.2	12.606
		1982	0.02	11.538
		1983	-39.42	11.538	10.83
		1984	4.892	11.538	-23.37	-39.42	-38.692	10.83	-0.37
		1985	11.538	-18.42	10.83	4.892	12.702	-16.294	-0.171
		1986	10.83	-15.787	-23.37	-33.425
		1987	-33.425	-23.37	12.606	12.702	-15.787	10.2	10.83	11.985
		1988	12.3	-38.379	-0.37	-15.787	11.538
		1989	-20.73	11.985	1.22
		1990	-23.37	-40.59	-15.787	-24.188	-0.171	12.3	-38.692	1.22
		1991	-23.37	0.33	-39.42	-45.9	10.83	-0.37	10.2	-35.223
		1992	10.2	-39.42	-38.692	-37.856	12.506	10.2
		1993	-23.37	-0.43	-27.109	11.985	-1.467	-24.29	-0.171	-23.37	1.22
		1994	-37.856	9.979	-23.37	-39.42	12.606	-23.37	-38.692	4.892	10.2	-34.814
		1995	10.83	-38.692	-37.856	-20.73	16.72	12.506	-39.42	14.95	-0.37
		1996	11.985	-23.37	-39.42	0.792	10.2	-39.42
		1997	15.307	38.23	11.985	12.702	-0.171	-38.692
		1998	38.73	-35.223	-38.692	-0.92	11.985	-0.171	-38.692	-39.42	10.83
		1999	11.538	11.985	-1.467	12.506	12.606	12.702
		2000	-23.37	-37.856	-15.787	1.22
		2001	12.3	-0.171	-23.37	12.702	11.985	12.606
		2002	-0.077	-23.37	12.606	-38.692	-0.171	1.22	12.702	-0.171
		2003	-23.37	11.985	-36.868	-15.787	12.702	-39.42	-0.171	-38.692
		2004	12.702	-0.077	12.606	-39.42	1.22	11.985	12.606	16.72
		2005	1.22	12.702	-0.83	11.538	-0.37	-23.37	16.72	11.985
		2006	12.606	10.2	11.538	12.606	11.985	-23.37	-16.355	10.2
		2007	11.538	12.702	12.606	1.22	12.606	-38.692	-0.077	2.93	11.538
		2008	12.702	2.93	-39.42	1.22	11.538	-0.077	12.606	12.702	-0.92	-42.833	11.985	-0.171	10.2	2.93	-38.692
		2009	11.538	-39.42	10.2	12.702	-0.37	-0.171	-39.42	-37.92	-36.868	10.2
		2010	-1.467	-35.223	1.22	10.025	-16.355	12.702	10.025	-1.467
		2011	-1.467	-45.9	27.73	10.83	12.702	-2.005	-40.59	-1.467	1.22	12.606	-35.223	10.025
		2012	12.702	-37.856	-39.42	10.83	12.702	1.22	11.985	4.892	10.83	10.025	-37.92
		2013	12.606	-16.355	-39.42	12.702	10.025	11.985	-23.37	-2.005
		2014	-39.42	14.95	4.892	10.025	10.83	-15.787	12.702	-37.856	12.702
		2015	12.423	-23.37	11.985	12.606	-37.856	-0.677	12.3	-15.787	10.83	0.02	12.606	-41.33	10.025	12.702	-2.005
		2016	-15.787	-16.355	10.2	12.702	-2.005	-36.868
		2017	-0.37	12.702	-2.005	-37.856	10.83	10.2	12.3	12.702
		2018	-35.223	-2.005	10.83	-0.83	12.606	-0.37	12.702	-2.005
		2019	-37.856	-16.355	-2.005	12.702	10.2
		2020	12.702	13.33	12.606	10.025	-37.856	10.83	-0.37

## Sheet: EO
		Year	1	2	3	4	5	6	7	8	9	10	11	12	13	14	15	16	17	18	19
		1967	-70.761	-83.852	-70.568	-84.233
		1968	-86.702	-84.703	-84.233	-69.797	-91.408	-91.55	-91.55
		1969	-86.702	-85.324	-70.903	-67.73	-84.233	-85.324	-86.84
		1970	-85.324	-84.233
		1971	-71.729	-71.93	-17.83	-61.18	-72.97	-87.004	-86.702
		1972	-72.618	-77.656	-61.64	-73.504	-71.378	-71.349	-67.73	-67.853	-86.15	-91.55	-84.233
		1973	-85.622	-91.55	-77.656	-91.35	-71.378	-77.37
		1974	-84.233	-61.64	-67.73	-77.37	-83.852
		1975	-86.84
		1976	-86.84	-87.004	-61.664	-84.233	-87.004	-77.656
		1977	-84.233	-61.64	-87.004	-84.233	-85.622	-91.55	-76.4	-83.852	-71.93	-61.64
		1978	-84.233	-91.55	-73.504	-85.622
		1979	-91.17	-71.729	-84.233	-72.07	-61.18	-73.504	-91.408
		1980	-84.233	-71.45	-84.233	-71.93	-69.797
		1981	-86.84	-78.598	-91.55	-84.233	-86.84
		1982	-91.35	-85.622
		1983	-71.93	-85.622	-85.324
		1984	-75.324	-85.622	-67.73	-71.93	-71.729	-85.324	-91.55
		1985	-85.622	-69.092	-85.324	-75.324	-87.004	-71.409	-78.598
		1986	-85.324	-71.857	-67.73	-69.797
		1987	-69.797	-67.73	-86.84	-87.004	-71.857	-84.233	-85.324	-86.165
		1988	-61.64	-71.586	-91.55	-71.857	-85.622
		1989	-68.55	-86.165	-77.37
		1990	-67.73	-72.117	-71.857	-68.054	-78.598	-61.64	-71.729	-77.37
		1991	-67.73	-90.47	-71.93	-72.97	-85.324	-91.55	-84.233	-70.568
		1992	-84.233	-71.93	-71.729	-71.183	-86.702	-84.233
		1993	-67.73	-91.12	-68.541	-86.165	-78.442	-67.783	-78.598	-67.73	-77.37
		1994	-71.183	-83.852	-67.73	-71.93	-86.84	-67.73	-71.729	-75.324	-84.233	-70.352
		1995	-85.324	-71.729	-71.183	-68.55	-62.18	-86.702	-71.93	-24.35	-91.55
		1996	-86.165	-67.73	-71.93	-86.15	-84.233	-71.93
		1997	-61.305	-26.63	-86.165	-87.004	-78.598	-71.729
		1998	-27.32	-70.568	-71.729	-91.408	-86.165	-78.598	-71.729	-71.93	-85.324
		1999	-85.622	-86.165	-78.442	-86.702	-86.84	-87.004
		2000	-67.73	-71.183	-71.857	-77.37
		2001	-61.64	-78.598	-67.73	-87.004	-86.165	-86.84
		2002	-77.656	-67.73	-86.84	-71.729	-78.598	-77.37	-87.004	-78.598
		2003	-67.73	-86.165	-71.378	-71.857	-87.004	-71.93	-78.598	-71.729
		2004	-87.004	-77.656	-86.84	-71.93	-77.37	-86.165	-86.84	-62.18
		2005	-77.37	-87.004	-91.17	-85.622	-91.55	-67.73	-62.18	-86.165
		2006	-86.84	-84.233	-85.622	-86.84	-86.165	-67.73	-70.903	-84.233
		2007	-85.622	-87.004	-86.84	-77.37	-86.84	-71.729	-77.656	-76.03	-85.622
		2008	-87.004	-76.03	-71.93	-77.37	-85.622	-77.656	-86.84	-87.004	-91.408	-72.646	-86.165	-78.598	-84.233	-76.03	-71.729
		2009	-85.622	-71.93	-84.233	-87.004	-91.55	-78.598	-71.93	-71.45	-71.378	-84.233
		2010	-78.442	-70.568	-77.37	-83.767	-70.903	-87.004	-83.767	-78.442
		2011	-78.442	-72.97	-18.03	-85.324	-87.004	-78.341	-72.117	-78.442	-77.37	-86.84	-70.568	-83.767
		2012	-87.004	-71.183	-71.93	-85.324	-87.004	-77.37	-86.165	-75.324	-85.324	-83.767	-71.45
		2013	-86.84	-70.903	-71.93	-87.004	-83.767	-86.165	-67.73	-78.341
		2014	-71.93	-24.35	-75.324	-83.767	-85.324	-71.857	-87.004	-71.183	-87.004
		2015	-86.539	-67.73	-86.165	-86.84	-71.183	-78.436	-61.64	-71.857	-85.324	-91.35	-86.84	-72.618	-83.767	-87.004	-78.341
		2016	-71.857	-70.903	-84.233	-87.004	-78.341	-71.378
		2017	-91.55	-87.004	-78.341	-71.183	-85.324	-84.233	-61.64	-87.004
		2018	-70.568	-78.341	-85.324	-91.17	-86.84	-91.55	-87.004	-78.341
		2019	-71.183	-70.903	-78.341	-87.004	-84.233
		2020	-87.004	-61.18	-86.84	-83.767	-71.183	-85.324	-91.55
