# Supplementary material for: Clear anti-phase tendency of volcanic eruptions and consistent U.S. Dollar Index response to volcanic forcing
Source: Research Square preprint supplement (doi:10.21203/rs.3.rs-602091/v1), 2021-07-12
Supplement: Supplementary file 17 [file savMXNdata_R.xlsx]

## Sheet: nom
Year	NVOLmax	NVOLmin	USDX
1968	1.09492	-0.747671	0.687911
1969	0.430093	-1.04723	0.753382
1970	-0.698149	-0.880686	0.650772
1971	-1.23381	-0.247502	0.289237
1972	-0.753477	-0.110542	-0.340562
1973	-0.309727	0.975852	-0.791506
1974	0.0991432	0.121989	-1.05134
1975	-0.579452	0.700354	-0.787521
1976	-1.28952	1.74808	-0.667143
1977	-1.18591	2.30229	-0.823161
1978	-1.11037	2.36354	-1.29514
1979	-0.00688525	0.487249	-1.69004
1980	-0.825774	0.527606	-1.25395
1981	0.230117	-0.405079	-0.309587
1982	1.05391	-1.34685	0.918138
1983	2.27989	-1.33376	2.05891
1984	1.16861	-0.846958	2.85682
1985	0.462915	-0.849322	2.49445
1986	0.375382	-0.858601	1.27143
1987	0.907712	-0.874251	-0.105227
1988	0.163888	-0.414024	-0.436009
1989	-0.589235	0.0409187	-0.579585
1990	-0.0848059	0.00941368	-0.586448
1991	-0.429698	0.455416	-0.84333
1992	-0.1462	-0.0656484	-0.624946
1993	-0.497755	0.855292	-0.540392
1994	-0.428367	0.810253	-0.577183
1995	0.0636682	0.763188	-0.718478
1996	-0.917665	0.232935	-0.485572
1997	-0.41865	-0.298257	0.0180069
1998	-0.124445	-0.829845	0.464074
1999	2.49695	-1.36129	0.919385
2000	2.59751	-1.41033	1.4855
2001	2.07666	-0.976435	1.86181
2002	-0.329047	-1.50417	1.47387
2003	0.0209764	-1.06618	0.654745
2004	-0.0344361	-0.625326	-0.0137993
2005	-0.0718634	0.300642	-0.266007
2006	-1.35475	0.267149	-0.443151
2007	-0.929373	1.20156	-0.733765
2008	-0.902614	1.1776	-0.871536
2009	-0.429331	1.64092	-0.824069
2010	-1.19469	1.14695	-0.837868
2011	-1.72096	1.62306	-0.845524
2012	-1.16303	0.661266	-0.851164
2013	0.269963	0.670633	-0.661449
2014	1.31457	0.20659	-0.186417
2015	0.285642	0.233091	0.264351
2016	0.136887	-0.212731	0.621093
2017	0.870012	-1.13033	0.487237
2018	1.01072	-1.07405	0.440689
2019	0.349851	-1.00677	0.370059

## Sheet: rst
	xnom.USDX -> xnom.NVOLmax	0.41265	0.523684
	xnom.NVOLmax -> xnom.USDX	18.6709	7.77455e-05
	xnom.USDX -> xnom.NVOLmax	4.25856	0.0202392
	xnom.NVOLmax -> xnom.USDX	13.2448	2.99784e-05
	xnom.USDX -> xnom.NVOLmax	4.15413	0.011516
	xnom.NVOLmax -> xnom.USDX	7.45974	0.000410972
	xnom.USDX -> xnom.NVOLmax	4.41142	0.00488316
	xnom.NVOLmax -> xnom.USDX	5.93136	0.000791829
	xnom.USDX -> xnom.NVOLmax	1.7569	0.146757
	xnom.NVOLmax -> xnom.USDX	5.29889	0.000950227
	xnom.USDX -> xnom.NVOLmax	2.08166	0.0822422
	xnom.NVOLmax -> xnom.USDX	4.47716	0.00202364
	>
	xnom.USDX -> xnom.NVOLmin	1.38562	0.244951
	xnom.NVOLmin -> xnom.USDX	5.23673	0.0265594
	xnom.USDX -> xnom.NVOLmin	2.10213	0.134036
	xnom.NVOLmin -> xnom.USDX	21.7276	2.48885e-07
	xnom.USDX -> xnom.NVOLmin	1.63873	0.194848
	xnom.NVOLmin -> xnom.USDX	15.2139	7.57968e-07
	xnom.USDX -> xnom.NVOLmin	1.36033	0.265338
	xnom.NVOLmin -> xnom.USDX	12.3677	1.37669e-06
	xnom.USDX -> xnom.NVOLmin	0.873424	0.508557
	xnom.NVOLmin -> xnom.USDX	9.91462	5.04994e-06
	xnom.USDX -> xnom.NVOLmin	0.740603	0.620834
	xnom.NVOLmin -> xnom.USDX	10.5216	1.61494e-06
