# Supplementary material for: Clear anti-phase tendency of volcanic eruptions and consistent U.S. Dollar Index response to volcanic forcing
Source: Research Square preprint supplement (doi:10.21203/rs.3.rs-602091/v1), 2021-07-12
Supplement: Supplementary file 18 [file savIDXdata.xlsx]

## Sheet: Sheet1
				9.54354e-05					-4.09333e-05
				-0.00880095					0.00398422
				0.220312					-0.109615
				-1.43334					0.81594
		Year	Raw	Trend	Detrend	MA3	z-score	Raw	Trend	Detrend	MA3	z-score
		1967	-0.741667	-1.22174	0.48007			0.475	0.710268	-0.235268
		1968	-0.154167	-1.02716	0.872993	0.619312	1.10888	0.391667	0.612319	-0.220653	-0.442589	-1.19819
		1969	-0.344167	-0.849039	0.504872	0.5535	0.991076	-0.35	0.521847	-0.871847	-0.352036	-0.954807
		1970	-0.404167	-0.686802	0.282636	0.00385061	0.00722907	0.475	0.438607	0.036393	-0.0298245	-0.0887788
		1971	-1.31583	-0.539877	-0.775956	-0.409932	-0.733422	1.10833	0.362353	0.745981	0.00206717	-0.00306135
		1972	-1.14417	-0.407691	-0.736476	-0.786476	-1.40742	-0.483333	0.292839	-0.776172	0.160552	0.422908
		1973	-1.13667	-0.289671	-0.846996	-0.566909	-1.0144	0.741667	0.22982	0.511847	0.220875	0.585042
		1974	-0.3025	-0.185245	-0.117255	-0.760693	-1.36127	1.1	0.17305	0.92695	0.883282	2.36544
		1975	-1.41167	-0.0938392	-1.31783	-0.523122	-0.936028	1.33333	0.122284	1.21105	0.792463	2.12134
		1976	-0.149167	-0.0148822	-0.134284	-0.486437	-0.870363	0.316667	0.0772758	0.239391	0.259776	0.689599
		1977	0.045	0.052199	-0.00719898	-0.0592646	-0.105744	-0.633333	0.0377801	-0.671113	-0.167314	-0.458317
		1978	0.0716667	0.107977	-0.0363104	-0.029678	-0.0527855	-0.0666667	0.00355128	-0.070218	-0.191336	-0.522884
		1979	0.1075	0.153025	-0.0455245	0.0128614	0.023358	0.141667	-0.0256563	0.167323	0.0268422	0.0635282
		1980	0.308333	0.187914	0.120419	0.233337	0.417998	-0.0666667	-0.0500883	-0.0165784	0.154134	0.405658
		1981	0.838333	0.213218	0.625115	0.0861748	0.154585	0.241667	-0.0699902	0.311657	-0.164771	-0.451484
		1982	-0.2575	0.22951	-0.48701	0.383026	0.685935	-0.875	-0.0856077	-0.789392	-0.379627	-1.02897
		1983	1.24833	0.237361	1.01097	0.29665	0.531326	-0.758333	-0.0971864	-0.661147	-0.4013	-1.08722
		1984	0.603333	0.237345	0.365988	0.391197	0.700562	0.141667	-0.104972	0.246638	-0.00732186	-0.0282968
		1985	0.0266667	0.230034	-0.203368	0.31804	0.569613	0.283333	-0.10921	0.392543	0.221998	0.588061
		1986	1.0075	0.216001	0.791499	0.50966	0.912604	-0.0833333	-0.110145	0.026812	-0.135318	-0.37232
		1987	1.13667	0.195818	0.940848	0.507985	0.909606	-0.933333	-0.108025	-0.825309	0.040421	0.100025
		1988	-0.0383333	0.170058	-0.208392	0.0296653	0.0534362	0.816667	-0.103093	0.91976	0.29946	0.796262
		1989	-0.504167	0.139294	-0.643461	-0.594206	-1.06326	0.708333	-0.0955964	0.80393	0.564268	1.508
		1990	-0.826667	0.104098	-0.930765	-0.839478	-1.50229	-0.116667	-0.08578	-0.0308867	0.0906442	0.235013
		1991	-0.879167	0.0650426	-0.944209	-0.379225	-0.678458	-0.575	-0.0738895	-0.50111	-0.432276	-1.17047
		1992	0.76	0.0227007	0.737299	0.286259	0.512728	-0.825	-0.0601706	-0.764829	-0.62369	-1.68495
		1993	1.04333	-0.0223552	1.06569	0.459736	0.823242	-0.65	-0.0448689	-0.605131	-0.722243	-1.94984
		1994	-0.493333	-0.0695524	-0.423781	0.399798	0.715955	-0.825	-0.02823	-0.79677	-0.469356	-1.27014
		1995	0.439167	-0.118318	0.557485	0.328373	0.588108	-0.0166667	-0.0104994	-0.00616728	-0.0453382	-0.130476
		1996	0.683333	-0.168081	0.851414	0.981277	1.75678	0.675	0.00807725	0.666923	-0.0332774	-0.0980592
		1997	1.31667	-0.218266	1.53493	0.725439	1.29884	-0.733333	0.0272543	-0.760588	-0.0551504	-0.156849
		1998	-0.478333	-0.268303	-0.210031	-0.0669378	-0.119479	-0.025	0.0467862	-0.0717862	-0.0162671	-0.0523395
		1999	-1.84333	-0.317618	-1.52572	-0.83198	-1.48887	0.85	0.0664274	0.783573	0.491951	1.31363
		2000	-1.12583	-0.365638	-0.760195	-1.00276	-1.79456	0.85	0.0859322	0.764068	0.566973	1.51527
		2001	-1.13417	-0.411792	-0.722375	-0.488744	-0.874491	0.258333	0.105055	0.153278	0.156265	0.411387
		2002	-0.439167	-0.455506	0.0163393	0.0572797	0.102865	-0.325	0.12355	-0.44855	-0.176037	-0.481764
		2003	0.381667	-0.496208	0.877875	0.401124	0.71833	-0.0916667	0.141172	-0.232839	-0.365799	-0.991801
		2004	-0.224167	-0.533325	0.309158	0.521662	0.934086	-0.258333	0.157676	-0.416009	-0.334999	-0.909015
		2005	-0.188333	-0.566285	0.377952	0.310264	0.555694	-0.183333	0.172815	-0.356148	-0.311167	-0.844961
		2006	-0.350833	-0.594515	0.243681	0.178858	0.320485	0.025	0.186344	-0.161344	-0.149614	-0.410745
		2007	-0.7025	-0.617442	-0.0850581	-0.290072	-0.518879	0.266667	0.198017	0.0686494	0.274905	0.730264
		2008	-1.66333	-0.634494	-1.02884	-0.500155	-0.894918	1.125	0.20759	0.91741	0.312637	0.831678
		2009	-1.03167	-0.645098	-0.386569	-0.609186	-1.09008	0.166667	0.214815	-0.0481485	0.519382	1.38736
		2010	-1.06083	-0.648682	-0.412151	-0.655238	-1.17251	0.908333	0.219448	0.688885	0.606498	1.62151
		2011	-1.81167	-0.644673	-1.16699	-0.893327	-1.59868	1.4	0.221244	1.17876	0.593673	1.58704
		2012	-1.73333	-0.632498	-1.10084	-0.940693	-1.68346	0.133333	0.219955	-0.086622	0.442266	1.18009
		2013	-1.16583	-0.611584	-0.554249	-0.174853	-0.312641	0.45	0.215338	0.234662	-0.0641463	-0.181027
		2014	0.549167	-0.58136	1.13053	0.679177	1.21603	-0.133333	0.207146	-0.340479	-0.364205	-0.987516
		2015	0.92	-0.541253	1.46125	1.25166	2.24074	-0.791667	0.195133	-0.9868	-0.566	-1.52989
		2016	0.6725	-0.490689	1.16319	0.986735	1.76655	-0.191667	0.179055	-0.370721	-0.385951	-1.04596
		2017	-0.0933333	-0.429096	0.335763	0.497451	0.890751	0.358333	0.158664	0.199669	-0.0127009	-0.0427545
		2018	-0.3625	-0.355902	-0.00659756	0.151289	0.271137	0.266667	0.133717	0.132949	-0.0904496	-0.251725
		2019	-0.145833	-0.270535	0.124701	-0.282048	-0.504515	-0.5	0.103967	-0.603967	-0.0245066	-0.0744854
		2020	-1.13667	-0.17242	-0.964246			0.466667	0.0691688	0.397498
