# Supplementary material for: Clear anti-phase tendency of volcanic eruptions and consistent U.S. Dollar Index response to volcanic forcing
Source: Research Square preprint supplement (doi:10.21203/rs.3.rs-602091/v1), 2021-07-12
Supplement: Supplementary file 19 [file savMXNdata.xlsx]

## Sheet: Sheet1
				-0.000449309					-6.26509e-05					0.000463469
				0.0370054					0.0059635					-0.028686
				-0.791276					-0.154546					-0.218809
				15.0601					2.46109					114.644
		Year	Raw	Trend	Detrend	MA3	z-score	Raw	Trend	Detrend	MA3	z-score	Raw	Trend	Detrend	MA3	z-score
		1967	17	14.3053	2.69465			2	2.31245	-0.312448			119.955	114.397	5.5584
		1968	17	13.6219	3.37806	1.68852	1.09492	2	2.17535	-0.175354	-0.512412	-0.747671	122.058	114.095	7.96335	7.39146	0.687911
		1969	12	13.0072	-1.00716	0.637535	0.430093	1	2.04944	-1.04944	-0.719702	-1.04723	122.394	113.742	8.65262	8.11396	0.753382
		1970	12	12.4583	-0.458295	-1.14604	-0.698149	1	1.93432	-0.934316	-0.604457	-0.880686	121.065	113.339	7.72592	6.98161	0.650772
		1971	10	11.9727	-1.97266	-1.99284	-1.23381	2	1.82962	0.17038	-0.166303	-0.247502	117.457	112.89	4.5663	2.9919	0.289237
		1972	8	11.5476	-3.54756	-1.2335	-0.753477	2	1.73497	0.265028	-0.0715291	-0.110542	109.082	112.398	-3.31653	-3.95824	-0.340562
		1973	13	11.1803	1.81971	-0.532004	-0.309727	1	1.65	-0.649995	0.68024	0.975852	98.7408	111.865	-13.1245	-8.93463	-0.791506
		1974	11	10.8682	0.131837	0.114356	0.0991432	4	1.57431	2.42569	0.0893795	0.121989	100.932	111.295	-10.3629	-11.802	-1.05134
		1975	9	10.6085	-1.60848	-0.958396	-0.579452	0	1.50755	-1.50755	0.4896	0.700354	98.77	110.689	-11.9187	-8.89065	-0.787521
		1976	9	10.3985	-1.39854	-2.0809	-1.28952	2	1.44933	0.550665	1.21461	1.74808	105.66	110.05	-4.39041	-7.56222	-0.667143
		1977	7	10.2357	-3.23566	-1.91711	-1.18591	6	1.39929	4.60071	1.59812	2.30229	103.005	109.383	-6.37761	-9.28396	-0.823161
		1978	9	10.1171	-1.11714	-1.79769	-1.11037	1	1.35703	-0.357028	1.6405	2.36354	91.6042	108.688	-17.0838	-14.4925	-1.29514
		1979	9	10.0403	-1.04027	-0.0532587	-0.00688525	2	1.32219	0.677814	0.342134	0.487249	87.9533	107.969	-20.0161	-18.8504	-1.69004
		1980	12	10.0024	1.99763	-1.34779	-0.825774	2	1.29438	0.705615	0.37006	0.527606	87.7783	107.23	-19.4513	-14.0379	-1.25395
		1981	5	10.0007	-5.00074	0.321405	0.230117	1	1.27325	-0.273248	-0.275344	-0.405079	103.825	106.471	-2.64636	-3.61642	-0.309587
		1982	14	10.0327	3.96732	1.6237	1.05391	0	1.2584	-1.2584	-0.927037	-1.34685	116.946	105.697	11.2484	9.93213	0.918138
		1983	16	10.0955	5.9045	3.56178	2.27989	0	1.24946	-1.24946	-0.917976	-1.33376	126.105	104.911	21.1943	22.521	2.05891
		1984	11	10.1865	0.813503	1.80501	1.16861	1	1.24606	-0.246064	-0.581118	-0.846958	139.234	104.114	35.1204	31.3265	2.85682
		1985	9	10.303	-1.30298	0.689421	0.462915	1	1.24783	-0.247826	-0.582754	-0.849322	140.974	103.31	37.6646	27.3275	2.49445
		1986	13	10.4423	2.55774	0.551045	0.375382	0	1.25437	-1.25437	-0.589175	-0.858601	111.698	102.501	9.19752	13.8309	1.27143
		1987	11	10.6016	0.398374	1.39258	0.907712	1	1.26533	-0.265327	-0.600004	-0.874251	96.3208	101.69	-5.36948	-1.36121	-0.105227
		1988	12	10.7784	1.22161	0.216707	0.163888	1	1.28031	-0.280315	-0.281534	-0.414024	92.9692	100.881	-7.91167	-5.01155	-0.436009
		1989	10	10.9699	-0.969861	-0.973863	-0.589235	1	1.29896	-0.29896	0.0332798	0.0409187	98.3217	100.075	-1.7535	-6.59598	-0.579585
		1990	8	11.1733	-3.17334	-0.176439	-0.0848059	2	1.32089	0.679114	0.0114788	0.00941368	89.1533	99.2761	-10.1228	-6.67171	-0.586448
		1991	15	11.3861	3.61388	-0.721659	-0.429698	1	1.34572	-0.345718	0.320106	0.455416	90.3475	98.4864	-8.13887	-9.50654	-0.84333
		1992	9	11.6055	-2.60552	-0.273493	-0.1462	2	1.37308	0.626921	-0.0404631	-0.0656484	87.4508	97.7088	-10.258	-7.09656	-0.624946
		1993	10	11.8288	-1.82884	-0.829246	-0.497755	1	1.40259	-0.402593	0.596814	0.855292	94.0533	96.9462	-2.89284	-6.16347	-0.540392
		1994	14	12.0534	1.94662	-0.719555	-0.428367	3	1.43388	1.56612	0.565648	0.810253	90.8617	96.2012	-5.33958	-6.56947	-0.577183
		1995	10	12.2764	-2.27645	0.0582752	0.0636682	2	1.46658	0.533421	0.53308	0.763188	84.0008	95.4768	-11.476	-8.12874	-0.718478
		1996	13	12.4953	0.504653	-1.49306	-0.917665	1	1.5003	-0.500298	0.166152	0.232935	87.205	94.7756	-7.57065	-5.5585	-0.485572
		1997	10	12.7074	-2.70738	-0.704194	-0.41865	2	1.53467	0.465333	-0.201425	-0.298257	96.4717	94.1005	2.37113	-0.00126131	0.0180069
		1998	13	12.9099	0.090145	-0.239103	-0.124445	1	1.56931	-0.56931	-0.569276	-0.829845	98.65	93.4543	5.19574	4.92131	0.464074
		1999	15	13.1001	1.89993	3.90491	2.49695	0	1.60385	-1.60385	-0.937025	-1.36129	100.037	92.8396	7.19707	9.94588	0.919385
		2000	23	13.2753	9.72466	4.06388	2.59751	1	1.63791	-0.637915	-0.970963	-1.41033	109.704	92.2593	17.4448	16.1933	1.4855
		2001	14	13.433	0.567046	3.24049	2.07666	1	1.67112	-0.671124	-0.670714	-0.976435	115.654	91.7162	23.9379	20.346	1.86181
		2002	13	13.5702	-0.570226	-0.562546	-0.329047	1	1.7031	-0.703104	-1.0359	-1.50417	110.868	91.2131	19.6552	16.0649	1.47387
		2003	12	13.6845	-1.68446	-0.00921389	0.0209764	0	1.73348	-1.73348	-0.732818	-1.06618	95.3542	90.7527	4.60146	7.02546	0.654745
		2004	16	13.773	2.22704	-0.0968122	-0.0344361	2	1.76187	0.238129	-0.427752	-0.625326	87.1575	90.3378	-3.18032	-0.352258	-0.0137993
		2005	13	13.833	-0.833021	-0.155979	-0.0718634	2	1.78791	0.212094	0.213005	0.300642	87.4933	89.9712	-2.47791	-3.13549	-0.266007
		2006	12	13.862	-1.86196	-2.18402	-1.35475	2	1.81121	0.188792	0.189828	0.267149	85.9075	89.6557	-3.74824	-5.09036	-0.443151
		2007	10	13.8571	-3.85707	-1.51157	-0.929373	2	1.8314	0.168599	0.836427	1.20156	80.3492	89.3941	-9.04494	-8.29743	-0.733765
		2008	15	13.8157	1.18433	-1.46926	-0.902614	4	1.84811	2.15189	0.819845	1.1776	77.09	89.1891	-12.0991	-9.8178	-0.871536
		2009	12	13.735	-1.73505	-0.721079	-0.429331	2	1.86096	0.139044	1.14046	1.64092	80.7342	89.0435	-8.30936	-9.29398	-0.824069
		2010	12	13.6125	-1.61252	-1.93098	-1.19469	3	1.86957	1.13043	0.798639	1.14695	81.4867	88.9602	-7.47349	-9.44626	-0.837868
		2011	11	13.4454	-2.44538	-2.76295	-1.72096	3	1.87356	1.12644	1.1281	1.62306	76.3858	88.9418	-12.5559	-9.53074	-0.845524
		2012	9	13.2309	-4.23094	-1.88094	-1.16303	3	1.87257	1.12743	0.462551	0.661266	80.4283	88.9911	-8.56281	-9.59299	-0.851164
		2013	14	12.9665	1.0335	0.384395	0.269963	1	1.86621	-0.866214	0.469033	0.670633	81.4508	89.1111	-7.66023	-7.49939	-0.661449
		2014	17	12.6494	4.35063	2.03576	1.31457	3	1.85412	1.14588	0.147922	0.20659	83.0292	89.3043	-6.27514	-2.25718	-0.186417
		2015	13	12.2768	0.723152	0.409181	0.285642	2	1.8359	0.164096	0.16626	0.233091	96.7375	89.5737	7.16383	2.71726	0.264351
		2016	8	11.8462	-3.84624	0.174022	0.136887	1	1.8112	-0.811198	-0.142242	-0.212731	97.185	89.9219	7.26309	6.65409	0.621093
		2017	15	11.3548	3.64515	1.33298	0.870012	2	1.77962	0.220376	-0.777209	-1.13033	95.8872	90.3518	5.53535	5.17692	0.487237
		2018	15	10.8	4.20002	1.55541	1.01072	0	1.74081	-1.74081	-0.738266	-1.07405	93.5985	90.8662	2.73232	4.66324	0.440689
		2019	7	10.1789	-3.17894	0.510686	0.349851	1	1.69437	-0.694367	-0.691702	-1.00677	97.1898	91.4678	5.72206	3.88381	0.370059
		2020	10	9.48903	0.510974			2	1.63993	0.360067			95.3564	92.1594	3.19704

## Sheet: Sheet2
		1967	284120	263280	267020	282020	261170	261160	263300	273070	263090	264040	284130	284010	282110	263180	261140	263280	263250
		1968	282050	261140	261160	267030	267040	284110	284130	284010	282020	266030	273030	284130	261170	273070	264010	284010	261160
		1969	284120	266100	273070	272020	263090	261170	262000	263180	274020	264100	284010	284120
		1970	267020	273070	283230	261140	261120	284010	272020	282110	266030	284070	284010	264010
		1971	263210	263340	282090	261170	266030	266100	284010	284070	264010	263250
		1972	264150	263250	284130	282050	262000	263310	264010	267020
		1973	284130	282050	264150	266100	263180	261140	263340	284096	264010	283110	261230	282110	266030
		1974	284130	283090	284080	263340	282050	263180	264010	283220	284010	261230	284120
		1975	266100	282110	284090	284080	284096	284091	262000	263340	261140
		1976	267020	273070	284080	284130	263340	282050	264010	283120	284120
		1977	283180	266110	284080	273070	285030	263340	282110
		1978	284120	284096	273010	262000	272020	273030	267020	263340	274020
		1979	273010	283040	262000	284070	261030	282110	267020	263200	282090
		1980	284070	264150	282050	282110	268060	272020	284096	263310	261140	267020	262000	284120
		1981	263200	282110	262000	273010	268040
		1982	261140	284120	283120	283110	266030	284070	263340	267020	284110	283110	284096	263140	261140	284120
		1983	263310	284040	263090	268060	283120	266010	282110	284110	284096	261140	273010	267020	284070	263310	283090	283110
		1984	284100	261140	282030	273030	266100	266030	263310	264150	282110	284100	263140
		1985	284096	263090	272020	282030	263340	264050	266030	272020	264150
		1986	284010	284070	263250	263200	261160	261120	261030	284096	284100	272020	284130	266100	284130
		1987	264071	284010	284070	284130	284110	284130	263340	283090	268040	272020	261140
		1988	268070	263180	272020	282110	266100	284070	273010	262000	268060	284121	282060	282030
		1989	272020	284080	284110	267020	283010	266030	283090	282110	284080	283120
		1990	261170	282100	284010	283110	268060	282030	263280	263340
		1991	282090	284080	263290	263340	284130	261030	267020	268060	266030	266100	283040	273083	260010	264071	272020
		1992	284130	262000	284080	273083	272020	282110	267040	263250	272020
		1993	284120	284080	272020	263350	268060	232050	263340	273083	273030	263200
		1994	260010	273010	261230	284120	264010	284130	284080	263340	264030	282110	262000	263350	284080	268060
		1995	284130	267020	282120	264030	263310	263340	284080	263340	263310	283070
		1996	263200	282030	267020	283170	261170	272020	262000	268060	267010	261120	285020	282100	284080
		1997	284080	284130	283090	283260	282060	264050	283260	263340	262000	284110
		1998	268030	261170	284110	284080	285020	284130	267020	261170	264010	284110	282060	261030	283090
		1999	284120	284130	284110	263340	263350	273030	282030	263180	261140	261170	267020	264010	261030	262000	282030
		2000	261030	282030	263310	284080	284110	282060	285020	263350	261220	284130	263180	273030	263340	284040	262000	266030	266100	285030	261140	282030	284110	260010	282060
		2001	284080	284121	284130	284110	261160	284120	262000	268030	261170	261140	284096	264090	284040	273030
		2002	266100	284130	272020	263100	273030	267010	284080	284090	263350	263340	282060	284110	266100
		2003	284080	284110	273030	266100	268060	263200	282110	273030	284110	272020	282060	283110
		2004	284040	282030	266030	264030	283110	261140	261170	263310	284120	273030	267040	268030	263340	267020	282060	282110
		2005	266030	266020	284130	273030	263340	284130	260010	266030	282110	284040	261160	284080	272020
		2006	266030	273010	261230	261160	284040	273030	267020	272020	273010	263250	273030	284040
		2007	261160	262000	263280	261170	268060	263340	268040	266030	283040	261160
		2008	267020	282090	273030	283110	263340	266030	263250	260010	268060	284040	268030	261170	267020	282110	284040
		2009	282090	263200	273030	264030	264050	263180	284040	261170	262000	283110	263200	261230
		2010	263310	273010	263250	262000	260010	261080	267020	284120	284040	282090	284130	263300
		2011	261170	268060	261140	262000	266030	266100	282110	263300	267020	266100	282090
		2012	263340	264150	261140	268060	266100	266030	267020	261140	284120
		2013	284096	263250	260010	263090	261080	284090	263340	263300	282060	261170	273030	263090	260010	268040
		2014	268060	263340	283040	282110	273030	282050	267020	264050	263300	262000	263250	263180	263280	267020	261140	282110	263340
		2015	272020	261140	263310	264030	266100	268060	283020	263170	283110	282050	266100	273010	266030
		2016	261170	282110	268060	264030	273010	261170	273010	266030
		2017	272020	264020	261230	282090	261170	264050	273010	261140	267020	263200	284096	282080	264100	262000	260010
		2018	267020	282050	268060	266030	260010	284096	262000	263250	261140	261170	263200	282090	267020	283120	273030
		2019	284096	282060	283110	263090	282110	263310	261080
		2020	263250	263310	282060	282050	261080	263340	282060	266030	273070	282050

## Sheet: Sheet3
		1967	345060	345040
		1968	345033	345040
		1969	345040
		1970	345040
		1971	383010	360150
		1972	360160	345040
		1973	351080
		1974	345040	360160	351080	345060
		1975
		1976	360060	345040
		1977	345040	360160	345040	351060	345060	360160
		1978	345040
		1979	345040	360150
		1980	345040	345040
		1981	345040
		1982
		1983
		1984	351020
		1985	351020
		1986
		1987	345040
		1988	360160
		1989	351080
		1990	360160	351080
		1991	345040
		1992	345040	345040
		1993	351080
		1994	345060	351020	345040
		1995	360050	384010
		1996	345040
		1997	360101	382070
		1998	382050
		1999
		2000	351080
		2001	360160
		2002	351080
		2003
		2004	351080	360050
		2005	351080	360050
		2006	345040	345040
		2007	351080	351050
		2008	351050	351080	345040	351050
		2009	345040	345040
		2010	351080	345070	345070
		2011	383020	351080	345070
		2012	351080	351020	345070
		2013	345070
		2014	384010	351020	345070
		2015	360160	345070
		2016	345040
		2017	345040	360160
		2018
		2019	345040
		2020	360150	345070

## Sheet: Sheet4
																																			282060
																																			260010
																																			284110
																																			282030
																																			261140
																																			285030
		263250	261160																																266100														263340
		263280	284010															283110																	266030				282110										282110
		261140	264010															283090								272020								282030	262000				282060				284040						261140
		263180	273070														284120	263310								264071			268060					262000	284040	273030			267020				282110					268040	267020
		282110	261170					266030									261140	284070			284130					260010			284080		284080		283090	261030	263340	284040	266100		263340	272020			267020					260010	263280
		284010	284130	284120	264010			282110							284120		263140	267020			266100		282030			273083			263350		282100		261030	264010	273030	264090	284110	283110	268030	284080	284040		261170	261230	263300			263090	263180
		284130	273030	284010	284010			261230	284120						262000		284096	273010	263140		284130	261140	282060			283040			262000		285020		282060	267020	263180	284096	282060	282060	267040	261160	273030		268030	263200	284130	282090		273030	263250
		264040	266030	264100	284070	263250		283110	261230						267020		283110	261140	284100		272020	272020	284121	283120		266100		263200	282110	283070	261120	284110	284110	261170	284130	261140	263340	272020	273030	284040	263250	261160	284040	283110	282090	266100		261170	262000
		263090	282020	274020	266030	264010		264010	284010	261140	284120		274020	282090	261140		284110	284096	282110	264150	284100	268040	268060	284080		266030	272020	273030	264030	263310	267010	262000	264010	261140	261220	261170	263350	284110	284120	282110	273010	283040	268060	262000	284040	267020	284120	282060	263300
		273070	284010	263180	282110	284070	267020	284096	283220	263340	283120		263340	263200	263310		267020	284110	264150	272020	284096	283090	262000	282110	263340	268060	263250	273083	263340	263340	268060	263340	261170	263180	263350	268030	284090	273030	263310	266030	272020	266030	260010	261170	284120	263300	261140	263300	264050
		263300	284130	262000	272020	284010	264010	263340	264010	262000	264010	282110	267020	267020	284096		263340	282110	263310	266030	261030	263340	273010	283090	263280	267020	267040	263340	284080	284080	262000	283260	267020	282030	285020	262000	284080	282110	261170	260010	267020	268040	263250	284040	267020	282110	267020	263340	267020
		261160	284110	261170	284010	266100	263310	261140	263180	284091	282050	263340	273030	282110	272020		284070	266010	266030	264050	261120	284130	284070	266030	282030	261030	282110	232050	284130	263340	272020	264050	284130	273030	282060	284120	267010	263200	261140	284130	273030	263340	266030	263180	261080	266100	266030	284090	282050
		261170	267040	263090	261120	266030	262000	263180	282050	284096	263340	285030	272020	261030	268060	268040	266030	283120	266100	263340	261160	284110	266100	283010	268060	284130	272020	268060	264010	263310	261170	282060	285020	263350	284110	261160	273030	268060	283110	263340	284040	268060	263340	264050	260010	266030	266100	261080	273030
		282020	267030	272020	261140	261170	282050	266100	263340	284080	284130	273070	262000	284070	282110	273010	283110	268060	273030	282030	263200	284130	282110	267020	283110	263340	273083	263350	284120	264030	283170	283260	284080	263340	284080	284110	263100	266100	264030	273030	261160	261170	283110	264030	262000	262000	268060	263090	282110
		267020	261160	273070	283230	282090	284130	264150	284080	284090	284080	284080	273010	262000	282050	262000	283120	263090	282030	272020	263250	284070	272020	284110	284010	263290	284080	272020	261230	282120	267020	283090	284110	284110	263310	284130	272020	273030	266030	284130	261230	263280	273030	273030	263250	261140	261140	260010	283040
		263280	261140	266100	273070	263340	263250	282050	283090	282110	273070	266110	284096	283040	264150	282110	284120	284040	261140	263090	284070	284010	263180	284080	282100	284080	262000	284080	273010	267020	282030	284130	261170	284130	282030	284121	284130	284110	282030	266020	273010	262000	282090	263200	273010	268060	264150	263250	263340
		284120	282050	284120	267020	263210	264150	284130	284130	266100	267020	283180	284120	273010	284070	263200	261140	263310	284100	284096	284010	264071	268070	272020	261170	282090	284130	284120	260010	284130	263200	284080	268030	284120	261030	284080	266100	284080	284040	266030	266030	261160	267020	282090	263310	261170	263340	284096	268060
		1967	1968	1969	1970	1971	1972	1973	1974	1975	1976	1977	1978	1979	1980	1981	1982	1983	1984	1985	1986	1987	1988	1989	1990	1991	1992	1993	1994	1995	1996	1997	1998	1999	2000	2001	2002	2003	2004	2005	2006	2007	2008	2009	2010	2011	2012	2013	2014
[truncated: 6 more columns]

## Sheet: Sheet5
												360160
												345060
									345060			351060																															351050
									351080			345040																	345040														345040		345070	345070	345070		345070
		345040	345040			360150	345040		360160		345040	360160		360150	345040										351080		345040		351020	384010		382070							360050	360050	345040	351050	351080	345040	345070	351080	351020		351020
		345060	345033	345040	345040	383010	360160	351080	345040		360060	345040	345040	345040	345040	345040			351020	351020		345040	360160	351080	360160	345040	345040	351080	345060	360050	345040	360101	382050		351080	360160	351080		351080	351080	345040	351080	351050	345040	351080	383020	351080	345070	384010
		1967	1968	1969	1970	1971	1972	1973	1974	1975	1976	1977	1978	1979	1980	1981	1982	1983	1984	1985	1986	1987	1988	1989	1990	1991	1992	1993	1994	1995	1996	1997	1998	1999	2000	2001	2002	2003	2004	2005	2006	2007	2008	2009	2010	2011	2012	2013	2014
[truncated: 6 more columns]
