# Supplementary material for: Clear anti-phase tendency of volcanic eruptions and consistent U.S. Dollar Index response to volcanic forcing
Source: Research Square preprint supplement (doi:10.21203/rs.3.rs-602091/v1), 2021-07-12
Supplement: Supplementary file 20 [file savMXNdata50.xlsx]

## Sheet: Sheet1
				-0.000921865					-0.000206746					0.000463469
				0.0771319					0.0168858					-0.028686
				-1.69314					-0.303633					-0.218809
				28.6588					8.82852					114.644
		Year	Raw	Trend	Detrend	MA3	z-score	Raw	Trend	Detrend	MA3	z-score	Raw	Trend	Detrend	MA3	z-score
		1967	29	27.0419	1.95811			8	8.54157	-0.541569			119.955	114.397	5.5584
		1968	27	25.5737	1.42631	-0.288091	-0.119488	7	8.28715	-1.28715	-0.297576	-0.258478	122.058	114.095	7.96335	7.39146	0.687911
		1969	20	24.2487	-4.2487	-0.627921	-0.257456	9	8.06401	0.935986	-1.07403	-0.83386	122.394	113.742	8.65262	8.11396	0.753382
		1970	24	23.0614	0.938625	-2.10542	-0.85731	5	7.87093	-2.87093	-0.547203	-0.44346	121.065	113.339	7.72592	6.98161	0.650772
		1971	19	22.0062	-3.00619	-2.04839	-0.834157	8	7.70666	0.293339	0.950816	0.666627	117.457	112.89	4.5663	2.9919	0.289237
		1972	17	21.0776	-4.07762	0.215359	0.0849095	13	7.56996	5.43004	2.08793	1.50927	109.082	112.398	-3.31653	-3.95824	-0.340562
		1973	28	20.2701	7.72988	1.0247	0.413497	8	7.45959	0.540415	1.53205	1.09734	98.7408	111.865	-13.1245	-8.93463	-0.791506
		1974	19	19.5782	-0.578162	1.05183	0.424511	6	7.3743	-1.3743	-1.71558	-1.30927	100.932	111.295	-10.3629	-11.802	-1.05134
		1975	15	18.9962	-3.99622	-1.36438	-0.556454	3	7.31286	-4.31286	-1.65373	-1.26344	98.77	110.689	-11.9187	-8.89065	-0.787521
		1976	19	18.5188	0.481233	-1.88508	-0.767854	8	7.27403	0.725967	1.05218	0.741741	105.66	110.05	-4.39041	-7.56222	-0.667143
		1977	16	18.1403	-2.14026	-0.838069	-0.342774	14	7.25657	6.74343	1.40339	1.002	103.005	109.383	-6.37761	-9.28396	-0.823161
		1978	17	17.8552	-0.855179	-1.21781	-0.496946	4	7.25923	-3.25923	1.40114	1.00033	91.6042	108.688	-17.0838	-14.4925	-1.29514
		1979	17	17.658	-0.657985	0.981229	0.395847	8	7.28078	0.719218	-0.286664	-0.250392	87.9533	107.969	-20.0161	-18.8504	-1.69004
		1980	22	17.5431	4.45685	1.09791	0.443218	9	7.31998	1.68002	0.341221	0.214895	87.7783	107.23	-19.4513	-14.0379	-1.25395
		1981	17	17.5051	-0.50514	3.80443	1.54204	6	7.37558	-1.37558	-0.713965	-0.567038	103.825	106.471	-2.64636	-3.61642	-0.309587
		1982	25	17.5384	7.46157	3.43965	1.39395	5	7.44634	-2.44634	-1.78432	-1.36021	116.946	105.697	11.2484	9.93213	0.918138
		1983	21	17.6375	3.36252	4.00911	1.62514	6	7.53103	-1.53103	-1.53526	-1.17565	126.105	104.911	21.1943	22.521	2.05891
		1984	19	17.7968	1.20323	1.85167	0.749238	7	7.6284	-0.628403	-0.298884	-0.259447	139.234	104.114	35.1204	31.3265	2.85682
		1985	19	18.0108	0.989246	2.63952	1.0691	9	7.73722	1.26278	0.259381	0.154248	140.974	103.31	37.6646	27.3275	2.49445
		1986	24	18.2739	5.72609	1.04487	0.421686	8	7.85624	0.143764	1.80744	1.30142	111.698	102.501	9.19752	13.8309	1.27143
		1987	15	18.5807	-3.58071	0.406583	0.162545	12	7.98422	4.01578	1.01321	0.712863	96.3208	101.69	-5.36948	-1.36121	-0.105227
		1988	18	18.9256	-0.925622	-1.93648	-0.788721	7	8.11992	-1.11992	-0.455412	-0.37544	92.9692	100.881	-7.91167	-5.01155	-0.436009
		1989	18	19.3031	-1.30311	-3.31212	-1.34722	4	8.2621	-4.2621	-0.597182	-0.480497	98.3217	100.075	-1.7535	-6.59598	-0.579585
		1990	12	19.7076	-7.70764	-1.71481	-0.698726	12	8.40953	3.59047	0.589141	0.398613	89.1533	99.2761	-10.1228	-6.67171	-0.586448
		1991	24	20.1337	3.86631	-2.13902	-0.870949	11	8.56095	2.43905	1.1048	0.780733	90.3475	98.4864	-8.13887	-9.50654	-0.84333
		1992	18	20.5757	-2.57572	-0.912538	-0.373008	6	8.71513	-2.71513	0.617693	0.419771	87.4508	97.7088	-10.258	-7.09656	-0.624946
		1993	17	21.0282	-4.02821	-3.02985	-1.23262	11	8.87084	2.12916	0.795737	0.551708	94.0533	96.9462	-2.89284	-6.16347	-0.540392
		1994	19	21.4856	-2.48561	-4.15208	-1.68824	12	9.02682	2.97318	1.9735	1.42448	90.8617	96.2012	-5.33958	-6.56947	-0.577183
		1995	16	21.9424	-5.94241	-2.94036	-1.19629	10	9.18184	0.81816	0.818894	0.568868	84.0008	95.4768	-11.476	-8.12874	-0.718478
		1996	22	22.3931	-0.393066	-4.38917	-1.7845	8	9.33466	-1.33466	-0.666844	-0.532119	87.205	94.7756	-7.57065	-5.5585	-0.485572
		1997	16	22.8321	-6.83205	-3.82632	-1.55598	8	9.48403	-1.48403	-0.815806	-0.642506	96.4717	94.1005	2.37113	-0.00126131	0.0180069
		1998	19	23.2538	-4.25383	-2.57959	-1.04982	10	9.62873	0.371273	-1.29342	-0.996435	98.65	93.4543	5.19574	4.92131	0.464074
		1999	27	23.6529	3.34712	3.68988	1.49554	7	9.7675	-2.7675	-2.43177	-1.84	100.037	92.8396	7.19707	9.94588	0.919385
		2000	36	24.0237	11.9763	5.32094	2.15774	5	9.8991	-4.8991	-3.22963	-2.43124	109.704	92.2593	17.4448	16.1933	1.4855
		2001	25	24.3606	0.639354	5.65246	2.29233	8	10.0223	-2.0223	-2.01909	-1.53418	115.654	91.7162	23.9379	20.346	1.86181
		2002	29	24.6583	4.3417	1.02332	0.412934	11	10.1359	0.864141	-0.798897	-0.629975	110.868	91.2131	19.6552	16.0649	1.47387
		2003	23	24.9111	-1.9111	3.10569	1.25836	9	10.2385	-1.23853	0.43218	0.282298	95.3542	90.7527	4.60146	7.02546	0.654745
		2004	32	25.1135	6.88649	2.90513	1.17694	12	10.3291	1.67093	0.342048	0.215508	87.1575	90.3378	-3.18032	-0.352258	-0.0137993
		2005	29	25.26	3.74	3.42715	1.38887	11	10.4063	0.593748	0.265284	0.158622	87.4933	89.9712	-2.47791	-3.13549	-0.266007
		2006	25	25.345	-0.345032	0.343962	0.137121	9	10.4688	-1.46882	-0.796874	-0.628477	85.9075	89.6557	-3.74824	-5.09036	-0.443151
		2007	23	25.3631	-2.36308	-1.00558	-0.410782	9	10.5155	-1.51555	0.490148	0.325255	80.3492	89.3941	-9.04494	-8.29743	-0.733765
		2008	25	25.3086	-0.308619	-1.94927	-0.793914	15	10.5452	4.45482	0.794259	0.550612	77.09	89.1891	-12.0991	-9.8178	-0.871536
		2009	22	25.1761	-3.17611	-1.14825	-0.468705	10	10.5565	-0.556492	0.450031	0.295527	80.7342	89.0435	-8.30936	-9.29398	-0.824069
		2010	25	24.96	0.0399789	-2.93032	-1.19221	8	10.5482	-2.54823	-0.207962	-0.19207	81.4867	88.9602	-7.47349	-9.44626	-0.837868
		2011	19	24.6548	-5.65483	-1.95661	-0.796894	13	10.5192	2.48084	0.154855	0.0767904	76.3858	88.9418	-12.5559	-9.53074	-0.845524
		2012	24	24.255	-0.254989	-1.55493	-0.633815	11	10.468	0.531958	1.20639	0.856016	80.4283	88.9911	-8.56281	-9.59299	-0.851164
		2013	25	23.755	1.24502	1.61358	0.652578	11	10.3936	0.606368	0.281211	0.170425	81.4508	89.1111	-7.66023	-7.49939	-0.661449
		2014	27	23.1493	3.85073	1.22114	0.493248	10	10.2947	-0.294692	3.04723	2.22015	83.0292	89.3043	-6.27514	-2.25718	-0.186417
		2015	21	22.4323	-1.43233	-0.393411	-0.162246	19	10.17	8.83002	2.50569	1.81885	96.7375	89.5737	7.16383	2.71726	0.264351
		2016	18	21.5986	-3.59863	-0.55786	-0.229012	9	10.0183	-1.01826	2.32449	1.68457	97.185	89.9219	7.26309	6.65409	0.621093
		2017	24	20.6426	3.35738	1.73332	0.701189	9	9.83828	-0.838283	-0.828452	-0.651876	95.8872	90.3518	5.53535	5.17692	0.487237
		2018	25	19.5588	5.44121	1.48566	0.600641	9	9.62881	-0.628815	-1.61857	-1.23738	93.5985	90.8662	2.73232	4.66324	0.440689
		2019	14	18.3416	-4.34161	0.0380217	0.0129117	6	9.38861	-3.38861	-1.71129	-1.30609	97.1898	91.4678	5.72206	3.88381	0.370059
		2020	16	16.9855	-0.985532			8	9.11644	-1.11644			95.3564	92.1594	3.19704

## Sheet: Sheet2
		1967	284120	263280	267020	282020	300130	261170	300240	261160	290360	263300	273070	257020	263090	222120	264040	300260	284130	284010	282110	263180	290061	261140	284140	300240	263280	252120	252010	290380	263250
		1968	282050	261140	264180	284133	261160	267030	255020	267040	284110	284130	284010	282020	266030	300260	300240	257020	264140	265060	273030	251050	290070	284130	261170	273070	264010	284010	261160
		1969	284120	266100	273070	255060	272020	252010	257020	300260	263090	222120	261170	262000	263180	274020	284142	264100	290380	264110	284010	284120
		1970	267020	273070	283230	300240	261140	261120	264180	264270	290070	284210	284010	272020	300260	255020	252010	300130	282110	290120	266030	284070	284010	300240	252120	264010
		1971	300260	263210	263340	256010	282090	290380	300260	264110	261170	266030	257020	266100	284010	284070	300250	264010	252010	264180	263250
		1972	255060	264150	251070	263250	284130	233010	282050	255020	290390	262000	233020	290160	300040	263310	264010	267020	250030
		1973	284130	264250	282050	264150	300240	257020	252120	284133	266100	263180	290360	290120	261140	290030	290390	290070	263340	233020	251050	264220	284096	264010	252010	283110	261230	282110	290070	266030
		1974	251030	284130	255060	251070	222120	283090	284080	290030	263340	282050	263180	300260	264010	251020	283220	284010	261230	251030	284120
		1975	284134	266100	233020	282110	284090	284131	255060	284080	284096	284091	300240	284210	262000	263340	261140
		1976	284131	233020	290240	267020	273070	255060	284080	284133	284130	263340	282050	264010	300250	264250	283120	284131	284120	257020	251050
		1977	283180	266110	233020	284080	284133	273070	285030	300260	255060	263340	257020	282110	233010	300250	233020	255060
		1978	285040	284120	284096	300250	284133	273010	290030	262000	272020	255060	285040	252120	273030	267020	284131	263340	274020
		1979	273010	284141	283040	300250	262000	284070	284132	261030	282110	267020	233020	284133	290260	263200	282090	300250	251030
		1980	284070	264150	255060	252120	282050	282110	234070	268060	300270	300250	272020	284096	257020	300070	263310	290270	300250	261140	267020	262000	284120	251030
		1981	300260	290390	255060	257020	263200	282110	300250	290030	284170	290390	262000	273010	268040	285040	233020	300260	284133
		1982	261140	284133	284120	290150	264220	283120	300260	283110	266030	284070	263340	267020	284110	283110	257020	284096	255060	284210	263140	290390	300260	261140	284120	290030	284133
		1983	263310	233020	252120	284040	263090	264250	268060	283120	266010	282110	284110	284096	261140	273010	267020	284070	264220	263310	283090	283110	222120
		1984	252120	284100	261140	282030	273030	252120	300070	266100	256010	266030	263310	264150	285070	282110	300270	300260	284100	300250	263140
		1985	255060	284096	252120	263090	272020	282030	284142	263340	300260	264050	285050	233020	300250	300270	266030	300130	272020	264150	234010
		1986	300250	300260	290360	284010	284070	290260	263250	290240	263200	261160	255060	261120	261030	284096	284100	300260	272020	264220	290390	284130	300270	300250	266100	284130
		1987	264071	284010	284070	290380	264220	284130	284170	284110	284130	284210	263340	283090	268040	272020	261140
		1988	285050	300270	284170	268070	263180	272020	282110	265090	266100	284070	273010	284170	262000	268060	284121	282060	282030	285070
		1989	272020	284142	256010	300250	284080	284110	267020	283010	290070	266030	283090	300270	282110	290380	284080	290240	283120	252120
		1990	261170	282100	284010	283110	268060	282030	263280	300250	264180	233020	263340	300270
		1991	282090	284080	264220	263290	263340	233020	284130	233010	261030	267020	268060	266030	266100	283040	264180	264220	255060	300260	273083	260010	264071	272020	290380	300100
		1992	234011	284130	262000	300260	233020	284080	273083	272020	234010	282110	284170	267040	300250	284131	300260	263250	234010	272020
		1993	251050	284120	300250	264250	284080	272020	263350	264220	268060	232050	263340	273083	273030	263200	284170	252120	234010
		1994	260010	273010	261230	252140	222120	300260	284120	264010	284130	284080	263340	300250	264030	282110	252120	262000	263350	284080	268060
		1995	234000	252140	284130	267020	284202	282120	300250	264030	263310	263340	284080	256010	263340	263310	257030	283070
		1996	263200	282030	234011	290390	285070	300260	267020	283170	261170	272020	300250	262000	268060	284170	267010	261120	285020	282100	284080	284131	300125	300130
		1997	300250	284080	284130	283090	300260	290390	283260	282060	264050	283260	300250	263340	262000	284110	300270	255060
		1998	268030	285070	261170	284110	284080	285020	284130	300260	267020	261170	264010	255060	300250	300270	284110	282060	261030	283090	233020
		1999	255060	252120	290100	284120	284130	284110	300270	263340	233020	263350	273030	282030	264250	256010	263180	261140	300270	264180	261170	267020	264010	261030	300250	255060	262000	300260	282030
		2000	261030	282030	263310	284080	284110	282060	252120	285020	263350	261220	300260	284130	300250	263180	273030	263340	300060	284040	233020	251020	262000	266030	266100	285030	300060	300250	261140	234010	256010	255020	282030	233020	300260	284110	260010	282060
		2001	300250	300130	284080	284121	284130	284110	300100	261160	284120	252120	300250	262000	251020	233020	268030	261170	234011	284141	261140	233020	284096	252120	264090	284040	273030
		2002	300250	266100	284130	272020	300260	233020	256010	263100	251020	264180	273030	252140	267010	284080	252120	284090	252080	251070	263350	263340	252010	282060	256010	300260	284110	266100	290360	251020	233020
		2003	284080	284110	251020	273030	266100	268060	300250	263200	282110	284211	264200	234010	233020	264180	251020	284200	290360	252120	273030	284110	272020	282060	283110
		2004	284040	252010	234011	251020	282030	266030	264030	300260	283110	261140	290260	264160	234070	261170	263310	284120	273030	267040	268030	233020	263340	252120	284200	267020	255060	282060	285050	252080	264160	252010	300250	282110
		2005	266030	266020	300250	257030	233010	252070	233020	284130	273030	263340	234011	284130	290120	260010	252010	266030	233010	282110	284040	261160	252120	290360	284080	233020	264160	290380	252140	272020	300260
		2006	266030	284170	251070	273010	261230	261160	284040	252140	252010	233020	273030	267020	264260	272020	233010	300250	285070	273010	284200	263250	234010	252120	273030	284040	256010
		2007	252120	261160	284200	262000	263280	261170	252080	268060	290360	263340	268040	266030	222120	251070	300250	252120	255060	283040	261160	290360	300260	264260	233010
		2008	300090	267020	285070	300260	233020	256010	282090	273030	283110	290360	252070	300250	263340	266030	263250	260010	268060	284040	264160	268030	261170	267020	252070	282110	284040
		2009	300250	282090	233020	257020	263200	252010	273030	290120	300260	290240	264030	264050	251030	263180	284170	284040	261170	262000	290380	283110	263200	261230
		2010	263310	300230	273010	263250	262000	233020	290240	260010	261080	251020	267020	252140	290380	290270	284120	300070	284193	252120	300250	284170	284040	282090	251030	284130	263300
		2011	261170	268060	300260	257020	261140	262000	252010	266030	266100	222120	257030	282110	263300	284170	300260	252140	267020	266100	282090
		2012	252010	300240	290150	252120	284170	263340	264150	290390	261140	268060	266100	234010	300260	266030	290070	252010	267020	264270	252120	252080	261140	284120	251030	264230
		2013	284096	263250	252010	300120	260010	263090	261080	264250	300260	290200	252120	284090	263340	290260	263300	282060	261170	273030	263090	260010	290070	284305	251030	268040	252140
		2014	268060	290290	263340	290260	264180	283040	282110	273030	282050	252140	251020	233020	267020	300120	264050	284141	263300	262000	251030	263250	263180	263280	267020	261140	255060	282110	263340
		2015	272020	261140	263310	264030	252010	290390	266100	300260	268060	264270	283020	263170	222120	283110	282050	266100	273010	290360	233020	266030	300260
		2016	290260	300120	261170	290380	252120	282110	300130	222120	233020	268060	264030	290360	273010	233020	261170	290360	273010	266030
		2017	272020	264020	261230	256010	290240	282090	257030	261170	264050	233020	252120	273010	261140	300130	267020	263200	284096	222120	282080	300010	264100	262000	233020	260010
		2018	256010	267020	282050	268060	266030	260010	252120	290200	290240	290390	284096	233005	262000	252120	263250	300130	261140	261170	233020	263200	282090	267020	283120	273030	251002
		2019	284096	282060	283110	263090	252120	290250	233020	290240	282110	300260	233020	263310	300130	261080
		2020	263250	263310	233020	264230	282060	255060	282050	261080	263340	282060	300130	266030	255060	233020	273070	282050

## Sheet: Sheet3
		1967	390030	357060	345060	333060	342090	357040	343100	345040
		1968	344070	345033	345040	357010	353060	353010	353010
		1969	344070	345020	354020	355100	345040	345020	333030	390030	344040
		1970	345020	390030	345040	333030	343100
		1971	357110	357120	383010	360150	342090	358057	344020	344070
		1972	342080	390030	358020	352010	360160	358060	357070	357080	355100	355090	334070	353010	345040
		1973	344120	353010	352010	353020	357070	351080	342090	341040
		1974	342090	345040	360160	355100	351080	345060
		1975	341040	342090	344040
		1976	343100	344040	344020	360060	345040	344020	352010	331021
		1977	345040	341040	333060	360160	344020	342090	345040	344120	353010	351060	342090	345060	357120	360160
		1978	345040	353010	358060	344120
		1979	353050	357110	333060	345040	357140	360150	358060	353060
		1980	345040	333060	357091	345040	357120	390050	321050	333060	357010
		1981	344040	352020	353010	345040	333040	344040
		1982	353020	331030	341120	333060	344120
		1983	333060	357120	344120	333060	341040	345020
		1984	351020	344120	355100	357120	357110	345020	353010
		1985	344120	355020	343100	345020	351020	344020	341040	354010	352020
		1986	345020	354006	355100	331030	331020	333060	341130	357010
		1987	357010	355100	344040	344020	354006	390030	341040	345040	333060	345020	344100	342090
		1988	360160	357100	353010	334050	354006	344120	341040
		1989	355040	321050	344100	351080
		1990	355100	321050	343010	334120	357150	354006	355107	352020	360160	357110	351080	342110
		1991	334050	355100	353080	357120	358057	345020	353010	334050	345040	341040	357040
		1992	345040	357120	357110	357090	344070	345040
		1993	355100	353040	355130	331020	344100	352080	355160	352020	355100	341021	351080
		1994	341090	357090	345060	355100	357120	344040	341040	355100	357110	351020	345040	357030
		1995	345020	357110	357090	355040	360050	344070	357120	384010	353010	343100
		1996	344100	355100	357120	334070	345040	341090	331031	357120
		1997	343100	341040	360101	382070	344100	344020	352020	357110
		1998	382050	357040	357110	353060	344100	352020	357110	357120	345020	331021
		1999	344120	344100	352080	344070	342090	344040	344020
		2000	342110	355100	357090	354006	351080
		2001	360160	352020	385052	342110	355100	344020	344100	344040
		2002	352010	355100	344040	357110	352020	351080	342110	344020	352020	343100	342090
		2003	355100	344100	357070	354006	344020	334040	357120	352020	357110
		2004	344020	352010	344040	321050	357120	386011	342110	351080	344100	341090	344040	360050
		2005	351080	344020	353050	334050	344120	343020	353010	355100	360050	344100	341090
		2006	344040	345040	344120	344040	344100	355100	354020	345040	342110
		2007	344120	344020	344040	351080	344040	357110	352010	351050	344120
		2008	344020	351050	357120	351080	344120	352010	344040	344020	353060	358041	344100	352020	345040	351050	357110
		2009	344120	357120	345040	344020	353010	352020	357120	357091	357070	345040
		2010	352080	357040	351080	345070	354020	344020	345070	352080
		2011	352080	358057	383020	345020	344020	352090	357150	352080	331021	351080	344040	357040	345070
		2012	344020	357090	357120	345020	344020	351080	344100	351020	345020	345070	357091
		2013	343100	344040	354020	357120	344020	345070	344100	355100	342110	352090	341040
		2014	357120	384010	351020	345070	345020	342110	354006	344020	357090	344020
		2015	344090	355100	344100	344040	357090	352050	343100	360160	354006	345020	342110	353020	344040	331021	358020	345070	344020	343100	352090
		2016	354006	354020	343100	345040	344020	390130	352090	343100	357070
		2017	353010	344020	352090	357090	345020	345040	360160	344020	343100
		2018	357040	352090	345020	353050	344040	353010	344020	352090	343100
		2019	357090	354020	341040	352090	344020	345040
		2020	344020	360150	344040	345070	357090	343100	345020	353010

## Sheet: Sheet4
																																			282060
																																			260010
																																			284110
																																			300260
																																			233020				282110
																																			282030				300250
																																			255020				252010
		263250																																	256010		233020		264160	300260
		290380						266030																											234010		251020		252080	272020
		252010	261160					290070																										282030	261140		290360		285050	252140									263340
		252120	284010					282110																										300260	300250		266100		282060	290380									282110
		263280	264010					261230									284133																	262000	300060	273030	284110		255060	264160	256010		284040		263300			252140	255060
		300240	273070		264010			283110									290030				284130					300100								255060	285030	284040	300260		267020	233020	284040		282110		284130		264230	268040	261140
		284140	261170		252120			252010									284120				266100					290380								300250	266100	264090	256010	283110	284200	284080	273030	233010	252070		251030		251030	251030	267020
		261140	284130		300240			264010							251030		261140				300250					272020					300130			261030	266030	252120	282060	282060	252120	290360	252120	264260	267020	261230	282090		284120	284305	263280
		290061	290070		284010			284096							284120		300260	222120			300270					264071					300125			264010	262000	284096	252010	272020	263340	252120	234010	300260	261170	263200	284040		261140	290070	263180
		263180	251050	284120	284070			264220							262000		290390	283110			284130					260010					284131			267020	251020	233020	263340	284110	233020	261160	263250	290360	268030	283110	284170		252080	260010	263250
		282110	273030	284010	266030	263250		251050	284120		251050				267020		263140	283090	263140	234010	290390					273083			268060		284080		233020	261170	233020	261140	263350	273030	268030	284040	284200	261160	264160	290380	300250	282090	252120	263090	251030
		284010	265060	264110	290120	264180		233020	251030		257020				261140		284210	263310	300250	264150	264220		285070	252120		300260	272020		284080		282100		283090	264180	284040	284141	251070	252120	267040	282110	273010	283040	284040	262000	252120	266100	264270	273030	262000
		284130	264140	290380	282110	252010	250030	263340	261230		284120		274020	251030	300250	284133	255060	264220	284100	272020	272020		282030	283120		255060	234010	234010	263350		285020		261030	300270	300060	234011	252080	290360	273030	233010	285070	255060	268060	261170	284193	267020	267020	261170	263300
		300260	257020	264100	300130	264010	267020	290070	284010		284131	255060	263340	300250	290270	300260	284096	284070	300260	300130	300260		282060	290240		264220	263250	252120	262000	283070	261120	255060	282060	261140	263340	261170	284090	284200	284120	266030	300250	252120	260010	284040	300070	252140	252010	282060	284141
		264040	300240	284142	252010	300250	264010	290390	283220	261140	283120	233020	284131	282090	263310	233020	257020	267020	300270	266030	284100	261140	284121	284080		264180	300260	284170	252120	257030	267010	300270	284110	263180	273030	268030	252120	251020	263310	252010	233010	300250	263250	284170	284120	300260	290070	263300	264050
		222120	300260	274020	255020	284070	263310	290030	251020	263340	264250	300250	267020	263200	300070	285040	283110	273010	282110	300270	284096	272020	268060	290380		283040	284131	263200	282110	263310	284170	284110	300270	256010	263180	233020	284080	264180	261170	260010	272020	251070	266030	263180	290270	284170	266030	290260	300120
		263090	266030	263180	300260	284010	300040	261140	264010	262000	300250	233010	273030	290260	257020	268040	284110	261140	285070	300250	261030	268040	262000	282110		266100	300250	273030	264030	263340	268060	262000	300250	264250	300250	251020	267010	233020	234070	290120	264260	222120	263340	251030	290380	263300	300260	263340	267020
		257020	282020	262000	272020	266100	290160	290120	300260	284210	264010	282110	252120	284133	284096	273010	267020	284096	264150	233020	261120	283090	284170	300270	300270	266030	267040	273083	300250	256010	262000	263340	255060	282030	284130	262000	252140	234010	264160	284130	267020	266030	300250	264050	252140	282110	234010	284090	233020
		273070	284010	261170	284010	257020	233020	290360	263180	300240	282050	257020	285040	233020	272020	262000	263340	284110	263310	285050	255060	263340	273010	283090	263340	268060	284170	263340	263340	284080	300250	300250	264010	273030	300260	300250	273030	264200	290260	234011	273030	268040	252070	264030	267020	257030	266100	252120	251020
		263300	284130	222120	284210	266030	262000	263180	282050	284091	263340	263340	255060	267020	300250	290390	284070	282110	266030	264050	261160	284210	284070	266030	233020	267020	282110	232050	284080	263340	272020	283260	261170	263350	261220	252120	264180	284211	261140	263340	233020	263340	290360	290240	251020	222120	268060	290200	252140
		290360	284110	263090	290070	261170	290390	266100	263340	284096	284130	255060	272020	282110	300270	284170	266030	266010	256010	300260	263200	284130	266100	290070	264180	261030	234010	268060	284130	263310	261170	264050	267020	233020	263350	284120	251020	282110	283110	273030	252010	290360	283110	300260	261080	266100	261140	300260	282050
		261160	267040	300260	264270	264110	255020	284133	290030	284080	284133	300260	262000	261030	268060	290030	283110	283120	266100	263340	290240	284110	265090	283010	300250	233010	272020	264220	264010	264030	283170	282060	300260	263340	285020	261160	263100	263200	300260	284130	252140	268060	273030	290120	260010	266030	290390	264250	273030
		300240	255020	257020	264180	300260	282050	252120	284080	255060	284080	285030	290030	284132	234070	300250	300260	268060	300070	284142	263250	284170	282110	267020	263280	284130	273083	263350	284120	300250	267020	283260	284130	300270	252120	300100	256010	300250	264030	233020	284040	252080	282090	273030	290240	252010	264150	261080	282110
		261170	267030	252010	261120	290380	233010	257020	283090	284131	255060	273070	273010	284070	282110	282110	283120	264250	252120	282030	290260	284130	272020	284110	282030	233020	284080	272020	300260	282120	300260	290390	285020	284110	282060	284110	233020	268060	266030	252070	261160	261170	256010	252010	233020	262000	263340	263090	283040
		300130	261160	272020	261140	282090	284130	300240	222120	284090	273070	284133	284133	262000	282050	263200	264220	263090	273030	272020	284070	264220	263180	284080	268060	263340	233020	284080	222120	284202	285070	300260	284080	284130	284110	284130	300260	266100	282030	233010	261230	263280	233020	263200	262000	261140	284170	260010	264180
		282020	284133	255060	300240	256010	263250	264150	251070	282110	267020	284080	300250	300250	252120	257020	290150	284040	282030	263090	284010	290380	268070	300250	283110	263290	300260	264250	252140	267020	290390	283090	284110	284120	284080	284121	272020	273030	251020	257030	273010	262000	300260	257020	263250	257020	252120	300120	290260
		267020	264180	273070	283230	263340	251070	282050	255060	233020	290240	233020	284096	283040	255060	255060	284120	252120	261140	252120	290360	284070	284170	256010	284010	264220	262000	300250	261230	284130	234011	284130	261170	290100	263310	284080	284130	251020	234011	300250	251070	284200	285070	233020	273010	300260	290150	252010	263340
		263280	261140	266100	273070	263210	264150	264250	284130	266100	233020	266110	284120	284141	264150	290390	284133	233020	284100	284096	300260	284010	300270	284142	282100	284080	284130	284120	273010	252140	282030	284080	285070	252120	282030	300130	266100	284110	252010	266020	284170	261160	267020	282090	300230	268060	300240	263250	290290
		284120	282050	284120	267020	300260	255060	284130	251030	284134	284131	283180	285040	273010	284070	300260	261140	263310	252120	255060	300250	264071	285050	272020	261170	282090	234011	251050	260010	234000	263200	300250	268030	255060	261030	300250	300250	284080	284040	266030	266030	252120	300090	300250	263310	261170	252010	284096	268060
		1967	1968	1969	1970	1971	1972	1973	1974	1975	1976	1977	1978	1979	1980	1981	1982	1983	1984	1985	1986	1987	1988	1989	1990	1991	1992	1993	1994	1995	1996	1997	1998	1999	2000	2001	2002	2003	2004	2005	2006	2007	2008	2009	2010	2011	2012	2013	2014
[truncated: 6 more columns]

## Sheet: Sheet5




																																											357110
												360160																															351050
							345040					357120																															345040			345070
							353010					345060										342090			342110				357030										360050				352020			357040
							334070					342090										344100			351080	357040		351080	345040								342090		344040	341090			344100			344040	357091	341040
							355090					351060										345020			357110	341040		341021	351020	343100			331021				343100		341090	344100			358041	345040		351080	345070	352090	344020
				344040			355100					353010			357010					352020		333060			360160	345040		355100	357110	353010			345020				352020	357110	344100	360050	342110	344120	353060	357070		331021	345020	342110	357090
		345040		390030		344070	357080	341040			331021	344120		353060	333060					354010	357010	345040			352020	334050		352020	355100	384010	357120	357110	357120			344040	344020	352020	351080	355100	345040	351050	344020	357091	352080	352080	351020	355100	344020
		343100	353010	333030		344020	357070	342090			352010	345040		358060	321050				353010	341040	341130	341040	341040		355107	353010		355160	341040	357120	331031	352020	357110	344020		344100	342110	357120	342110	353010	354020	352010	344040	357120	345070	357150	344100	344100	354006
		357040	353010	345020		358057	358060	351080	345060		344020	342090		360150	390050	344040		345020	345020	344020	333060	390030	344120		354006	345020	345040	352080	344040	344070	341090	344020	352020	344040		344020	351080	334040	386011	343020	355100	357110	352010	352020	344020	352090	351080	345070	342110
		342090	353060	345040	343100	342090	360160	357070	351080		345040	344020		357140	357120	333040	344120	341040	357110	351020	331020	354006	354006		357150	358057	344070	344100	357120	360050	345040	344100	344100	342090	351080	355100	352020	344020	357120	344120	344100	344040	344120	353010	354020	344020	344020	344020	345020
		333060	357010	355100	333030	360150	352010	353020	355100		360060	360160	344120	345040	345040	345040	333060	333060	357120	345020	331030	344020	334050	351080	334120	357120	357090	331020	355100	355040	334070	382070	353060	344070	354006	342110	357110	354006	321050	334050	344040	351080	351080	344020	345070	345020	345020	357120	345070
		345060	345040	354020	345040	383010	358020	352010	360160	344040	344020	333060	358060	333060	357091	353010	341120	344120	355100	343100	355100	344040	353010	344100	343010	353080	357110	355130	345060	357090	357120	360101	357110	352080	357090	385052	344040	357070	344040	353050	344120	344040	357120	345040	351080	383020	357120	354020	351020
		357060	345033	345020	390030	357120	390030	353010	345040	342090	344040	341040	353010	357110	333060	352020	331030	357120	344120	355020	354006	355100	357100	321050	321050	355100	357120	353040	357090	357110	355100	341040	357040	344100	355100	352020	355100	344100	352010	344020	345040	344020	351050	357120	357040	358057	357090	344040	384010
		390030	344070	344070	345020	357110	342080	344120	342090	341040	343100	345040	345040	353050	345040	344040	353020	333060	351020	344120	345020	357010	360160	355040	355100	334050	345040	355100	341090	345020	344100	343100	382050	344120	342110	360160	352010	355100	344020	351080	344040	344120	344020	344120	352080	352080	344020	343100	357120
		1967	1968	1969	1970	1971	1972	1973	1974	1975	1976	1977	1978	1979	1980	1981	1982	1983	1984	1985	1986	1987	1988	1989	1990	1991	1992	1993	1994	1995	1996	1997	1998	1999	2000	2001	2002	2003	2004	2005	2006	2007	2008	2009	2010	2011	2012	2013	2014
[truncated: 6 more columns]
