# Supplementary material for: Clear anti-phase tendency of volcanic eruptions and consistent U.S. Dollar Index response to volcanic forcing
Source: Research Square preprint supplement (doi:10.21203/rs.3.rs-602091/v1), 2021-07-12
Supplement: Supplementary file 21 [file savMXNdata60.xlsx]

## Sheet: Sheet1
				-0.00076541					-0.000249209					0.000463469
				0.0634163					0.0208064					-0.028686
				-1.37705					-0.387021					-0.218809
				25.0593					7.14224					114.644
		Year	Raw	Trend	Detrend	MA3	z-score	Raw	Trend	Detrend	MA3	z-score	Raw	Trend	Detrend	MA3	z-score
		1967	26	23.7449	2.25512			4	6.77578	-2.77578			119.955	114.397	5.5584
		1968	25	22.5527	2.44728	0.074733	0.0384008	7	6.44943	0.550568	-0.462306	-0.400014	122.058	114.095	7.96335	7.39146	0.687911
		1969	17	21.4782	-4.4782	-0.182555	-0.0786761	7	6.16171	0.838292	-0.84075	-0.689989	122.394	113.742	8.65262	8.11396	0.753382
		1970	22	20.5167	1.48326	-1.88623	-0.853921	2	5.91111	-3.91111	-0.589655	-0.497592	121.065	113.339	7.72592	6.98161	0.650772
		1971	17	19.6637	-2.66375	-2.0317	-0.920117	7	5.69615	1.30385	0.959143	0.689144	117.457	112.89	4.5663	2.9919	0.289237
		1972	14	18.9146	-4.91462	0.0522865	0.0281867	11	5.51532	5.48468	2.4738	1.84972	109.082	112.398	-3.31653	-3.95824	-0.340562
		1973	26	18.2648	7.73523	0.703666	0.324592	6	5.36713	0.632871	1.95582	1.45283	98.7408	111.865	-13.1245	-8.93463	-0.791506
		1974	17	17.7096	-0.709609	1.26036	0.577911	5	5.25009	-0.250087	-1.25997	-1.01121	100.932	111.295	-10.3629	-11.802	-1.05134
		1975	14	17.2445	-3.24454	-1.27304	-0.574892	1	5.1627	-4.1627	-1.17208	-0.943865	98.77	110.689	-11.9187	-8.89065	-0.787521
		1976	17	16.865	0.135032	-2.5586	-1.15988	6	5.10346	0.89654	0.55432	0.378956	105.66	110.05	-4.39041	-7.56222	-0.667143
		1977	12	16.5663	-4.56631	-1.92508	-0.871598	10	5.07088	4.92912	1.58739	1.17053	103.005	109.383	-6.37761	-9.28396	-0.823161
		1978	15	16.344	-1.34396	-1.7012	-0.769724	4	5.06347	-1.06347	1.92864	1.432	91.6042	108.688	-17.0838	-14.4925	-1.29514
		1979	17	16.1933	0.806665	0.784288	0.361278	7	5.07973	1.92027	0.246209	0.142872	87.9533	107.969	-20.0161	-18.8504	-1.69004
		1980	19	16.1098	2.89016	0.869312	0.399968	5	5.11817	-0.118166	0.541607	0.369216	87.7783	107.23	-19.4513	-14.0379	-1.25395
		1981	15	16.0889	-1.08889	2.8918	1.32028	5	5.17728	-0.177279	-1.18367	-0.952748	103.825	106.471	-2.64636	-3.61642	-0.309587
		1982	23	16.1259	6.87412	2.85634	1.30415	2	5.25558	-3.25558	-1.92814	-1.52318	116.946	105.697	11.2484	9.93213	0.918138
		1983	19	16.2162	2.78378	3.10086	1.41542	3	5.35156	-2.35156	-1.35696	-1.08552	126.105	104.911	21.1943	22.521	2.05891
		1984	16	16.3553	-0.355325	0.963286	0.44273	7	5.46374	1.53626	0.198028	0.105955	139.234	104.114	35.1204	31.3265	2.85682
		1985	17	16.5386	0.461403	2.11488	0.966753	7	5.59062	1.40938	0.404984	0.26453	140.974	103.31	37.6646	27.3275	2.49445
		1986	23	16.7614	6.23855	1.56023	0.714364	4	5.7307	-1.7307	0.598736	0.412989	111.698	102.501	9.19752	13.8309	1.27143
		1987	15	17.0193	-2.01928	1.63726	0.749417	8	5.88248	2.11752	-0.21922	-0.213754	96.3208	101.69	-5.36948	-1.36121	-0.105227
		1988	18	17.3075	0.692501	-0.982765	-0.442805	5	6.04448	-1.04448	-0.714054	-0.592911	92.9692	100.881	-7.91167	-5.01155	-0.436009
		1989	16	17.6215	-1.62152	-2.29525	-1.04004	3	6.2152	-3.2152	-0.884272	-0.723337	98.3217	100.075	-1.7535	-6.59598	-0.579585
		1990	12	17.9567	-5.95675	-1.29562	-0.585166	8	6.39314	1.60686	-0.0617122	-0.0930665	89.1533	99.2761	-10.1228	-6.67171	-0.586448
		1991	22	18.3086	3.69141	-0.979259	-0.44121	8	6.5768	1.4232	0.755121	0.532817	90.3475	98.4864	-8.13887	-9.50654	-0.84333
		1992	18	18.6724	-0.672446	-0.00825596	0.000637338	6	6.7647	-0.764698	0.901056	0.644637	87.4508	97.7088	-10.258	-7.09656	-0.624946
		1993	16	19.0437	-3.04374	-2.37801	-1.0777	9	6.95533	2.04467	1.37759	1.00977	94.0533	96.9462	-2.89284	-6.16347	-0.540392
		1994	16	19.4179	-3.41786	-4.41728	-2.00565	10	7.1472	2.8528	2.18621	1.62936	90.8617	96.2012	-5.33958	-6.56947	-0.577183
		1995	13	19.7902	-6.79023	-2.78811	-1.26432	9	7.33882	1.66118	0.995094	0.716691	84.0008	95.4768	-11.476	-8.12874	-0.718478
		1996	22	20.1563	1.84375	-3.48594	-1.58185	6	7.52869	-1.52869	-0.527611	-0.450052	87.205	94.7756	-7.57065	-5.5585	-0.485572
		1997	15	20.5113	-5.51133	-2.17282	-0.98433	6	7.71532	-1.71532	-0.713737	-0.592668	96.4717	94.1005	2.37113	-0.00126131	0.0180069
		1998	18	20.8509	-2.85087	-2.1775	-0.98646	9	7.8972	1.1028	-0.895122	-0.731651	98.65	93.4543	5.19574	4.92131	0.464074
		1999	23	21.1703	1.82971	3.50461	1.59914	6	8.07285	-2.07285	-1.73694	-1.37668	100.037	92.8396	7.19707	9.94588	0.919385
		2000	33	21.465	11.535	4.87811	2.22414	4	8.24077	-4.24077	-2.90436	-2.27119	109.704	92.2593	17.4448	16.1933	1.4855
		2001	23	21.7304	1.26962	4.94759	2.25576	6	8.39946	-2.39946	-2.39589	-1.88158	115.654	91.7162	23.9379	20.346	1.86181
		2002	24	21.9619	2.03813	1.05097	0.482628	8	8.54743	-0.547431	-1.21003	-0.97294	110.868	91.2131	19.6552	16.0649	1.47387
		2003	22	22.1549	-0.154856	2.85951	1.30559	8	8.68319	-0.683185	-0.678615	-0.565756	95.3542	90.7527	4.60146	7.02546	0.654745
		2004	29	22.3048	6.69524	2.3778	1.0864	8	8.80523	-0.805228	-0.800159	-0.658888	87.1575	90.3378	-3.18032	-0.352258	-0.0137993
		2005	23	22.407	0.593024	1.94378	0.888897	8	8.91206	-0.912064	-0.906497	-0.740367	87.4933	89.9712	-2.47791	-3.13549	-0.266007
		2006	21	22.4569	-1.45692	-2.10463	-0.953303	8	9.0022	-1.0022	-0.662799	-0.553638	85.9075	89.6557	-3.74824	-5.09036	-0.443151
		2007	17	22.45	-5.45	-2.42952	-1.10114	9	9.07413	-0.0741341	1.5991	1.1795	80.3492	89.3941	-9.04494	-8.29743	-0.733765
		2008	22	22.3816	-0.381623	-2.35961	-1.06933	15	9.12638	5.87362	2.21402	1.65067	77.09	89.1891	-12.0991	-9.8178	-0.871536
		2009	21	22.2472	-1.24719	-0.223646	-0.0973744	10	9.15743	0.842567	1.85013	1.37184	80.7342	89.0435	-8.30936	-9.29398	-0.824069
		2010	23	22.0421	0.957879	-2.35038	-1.06513	8	9.16581	-1.16581	0.842254	0.59958	81.4867	88.9602	-7.47349	-9.44626	-0.837868
		2011	15	21.7618	-6.76181	-2.06854	-0.936878	12	9.15	2.85	1.19189	0.867484	76.3858	88.9418	-12.5559	-9.53074	-0.845524
		2012	21	21.4017	-0.401676	-1.70687	-0.772304	11	9.10852	1.89148	1.23387	0.899649	80.4283	88.9911	-8.56281	-9.59299	-0.851164
		2013	23	20.9571	2.04288	2.07255	0.947493	8	9.03987	-1.03987	0.303018	0.186401	81.4508	89.1111	-7.66023	-7.49939	-0.661449
		2014	25	20.4235	4.57645	2.27432	1.03931	9	8.94256	0.0574426	1.73416	1.28299	83.0292	89.3043	-6.27514	-2.25718	-0.186417
		2015	20	19.7964	0.203629	0.569695	0.263629	15	8.81508	6.18492	1.19547	0.870223	96.7375	89.5737	7.16383	2.71726	0.264351
		2016	16	19.071	-3.071	-0.370067	-0.164002	6	8.65596	-2.65596	1.02176	0.737123	97.185	89.9219	7.26309	6.65409	0.621093
		2017	20	18.2428	1.75717	1.1263	0.516906	8	8.46368	-0.46368	-1.1188	-0.903039	95.8872	90.3518	5.53535	5.17692	0.487237
		2018	22	17.3073	4.69272	1.06337	0.488275	8	8.23676	-0.236758	-1.22471	-0.984192	93.5985	90.8662	2.73232	4.66324	0.440689
		2019	13	16.2598	-3.25976	0.112429	0.0555542	5	7.97369	-2.97369	-1.29448	-1.03765	97.1898	91.4678	5.72206	3.88381	0.370059
		2020	14	15.0957	-1.09567			7	7.673	-0.672996			95.3564	92.1594	3.19704

## Sheet: Sheet2
		1967	284120	263280	267020	282020	300130	261170	300240	261160	290360	263300	273070	263090	264040	300260	284130	284010	282110	263180	290061	261140	284140	300240	263280	252010	290380	263250
		1968	282050	261140	264180	284133	261160	267030	267040	284110	284130	284010	282020	266030	300260	300240	264140	265060	273030	251050	290070	284130	261170	273070	264010	284010	261160
		1969	284120	266100	273070	272020	252010	300260	263090	261170	262000	263180	274020	284142	264100	290380	264110	284010	284120
		1970	267020	273070	283230	300240	261140	261120	264180	264270	290070	284210	284010	272020	300260	252010	300130	282110	290120	266030	284070	284010	300240	264010
		1971	300260	263210	263340	282090	290380	300260	264110	261170	266030	266100	284010	284070	300250	264010	252010	264180	263250
		1972	264150	251070	263250	284130	282050	290390	262000	233020	290160	300040	263310	264010	267020	250030
		1973	284130	264250	282050	264150	300240	284133	266100	263180	290360	290120	261140	290030	290390	290070	263340	233020	251050	264220	284096	264010	252010	283110	261230	282110	290070	266030
		1974	251030	284130	251070	283090	284080	290030	263340	282050	263180	300260	264010	251020	283220	284010	261230	251030	284120
		1975	284134	266100	233020	282110	284090	284131	284080	284096	284091	300240	284210	262000	263340	261140
		1976	284131	233020	290240	267020	273070	284080	284133	284130	263340	282050	264010	300250	264250	283120	284131	284120	251050
		1977	283180	266110	233020	284080	284133	273070	285030	300260	263340	282110	300250	233020
		1978	285040	284120	284096	300250	284133	273010	290030	262000	272020	285040	273030	267020	284131	263340	274020
		1979	273010	284141	283040	300250	262000	284070	284132	261030	282110	267020	233020	284133	290260	263200	282090	300250	251030
		1980	284070	264150	282050	282110	234070	268060	300270	300250	272020	284096	300070	263310	290270	300250	261140	267020	262000	284120	251030
		1981	300260	290390	263200	282110	300250	290030	284170	290390	262000	273010	268040	285040	233020	300260	284133
		1982	261140	284133	284120	290150	264220	283120	300260	283110	266030	284070	263340	267020	284110	283110	284096	284210	263140	290390	300260	261140	284120	290030	284133
		1983	263310	233020	284040	263090	264250	268060	283120	266010	282110	284110	284096	261140	273010	267020	284070	264220	263310	283090	283110
		1984	284100	261140	282030	273030	300070	266100	266030	263310	264150	285070	282110	300270	300260	284100	300250	263140
		1985	284096	263090	272020	282030	284142	263340	300260	264050	285050	233020	300250	300270	266030	300130	272020	264150	234010
		1986	300250	300260	290360	284010	284070	290260	263250	290240	263200	261160	261120	261030	284096	284100	300260	272020	264220	290390	284130	300270	300250	266100	284130
		1987	264071	284010	284070	290380	264220	284130	284170	284110	284130	284210	263340	283090	268040	272020	261140
		1988	285050	300270	284170	268070	263180	272020	282110	265090	266100	284070	273010	284170	262000	268060	284121	282060	282030	285070
		1989	272020	284142	300250	284080	284110	267020	283010	290070	266030	283090	300270	282110	290380	284080	290240	283120
		1990	261170	282100	284010	283110	268060	282030	263280	300250	264180	233020	263340	300270
		1991	282090	284080	264220	263290	263340	233020	284130	261030	267020	268060	266030	266100	283040	264180	264220	300260	273083	260010	264071	272020	290380	300100
		1992	234011	284130	262000	300260	233020	284080	273083	272020	234010	282110	284170	267040	300250	284131	300260	263250	234010	272020
		1993	251050	284120	300250	264250	284080	272020	263350	264220	268060	232050	263340	273083	273030	263200	284170	234010
		1994	260010	273010	261230	300260	284120	264010	284130	284080	263340	300250	264030	282110	262000	263350	284080	268060
		1995	234000	284130	267020	284202	282120	300250	264030	263310	263340	284080	263340	263310	283070
		1996	263200	282030	234011	290390	285070	300260	267020	283170	261170	272020	300250	262000	268060	284170	267010	261120	285020	282100	284080	284131	300125	300130
		1997	300250	284080	284130	283090	300260	290390	283260	282060	264050	283260	300250	263340	262000	284110	300270
		1998	268030	285070	261170	284110	284080	285020	284130	300260	267020	261170	264010	300250	300270	284110	282060	261030	283090	233020
		1999	290100	284120	284130	284110	300270	263340	233020	263350	273030	282030	264250	263180	261140	300270	264180	261170	267020	264010	261030	300250	262000	300260	282030
		2000	261030	282030	263310	284080	284110	282060	285020	263350	261220	300260	284130	300250	263180	273030	263340	300060	284040	233020	251020	262000	266030	266100	285030	300060	300250	261140	234010	282030	233020	300260	284110	260010	282060
		2001	300250	300130	284080	284121	284130	284110	300100	261160	284120	300250	262000	251020	233020	268030	261170	234011	284141	261140	233020	284096	264090	284040	273030
		2002	300250	266100	284130	272020	300260	233020	263100	251020	264180	273030	267010	284080	284090	251070	263350	263340	252010	282060	300260	284110	266100	290360	251020	233020
		2003	284080	284110	251020	273030	266100	268060	300250	263200	282110	284211	264200	234010	233020	264180	251020	284200	290360	273030	284110	272020	282060	283110
		2004	284040	252010	234011	251020	282030	266030	264030	300260	283110	261140	290260	264160	234070	261170	263310	284120	273030	267040	268030	233020	263340	284200	267020	282060	285050	264160	252010	300250	282110
		2005	266030	266020	300250	233020	284130	273030	263340	234011	284130	290120	260010	252010	266030	282110	284040	261160	290360	284080	233020	264160	290380	272020	300260
		2006	266030	284170	251070	273010	261230	261160	284040	252010	233020	273030	267020	264260	272020	300250	285070	273010	284200	263250	234010	273030	284040
		2007	261160	284200	262000	263280	261170	268060	290360	263340	268040	266030	251070	300250	283040	261160	290360	300260	264260
		2008	300090	267020	285070	300260	233020	282090	273030	283110	290360	300250	263340	266030	263250	260010	268060	284040	264160	268030	261170	267020	282110	284040
		2009	300250	282090	233020	263200	252010	273030	290120	300260	290240	264030	264050	251030	263180	284170	284040	261170	262000	290380	283110	263200	261230
		2010	263310	300230	273010	263250	262000	233020	290240	260010	261080	251020	267020	290380	290270	284120	300070	284193	300250	284170	284040	282090	251030	284130	263300
		2011	261170	268060	300260	261140	262000	252010	266030	266100	282110	263300	284170	300260	267020	266100	282090
		2012	252010	300240	290150	284170	263340	264150	290390	261140	268060	266100	234010	300260	266030	290070	252010	267020	264270	261140	284120	251030	264230
		2013	284096	263250	252010	300120	260010	263090	261080	264250	300260	290200	284090	263340	290260	263300	282060	261170	273030	263090	260010	290070	284305	251030	268040
		2014	268060	290290	263340	290260	264180	283040	282110	273030	282050	251020	233020	267020	300120	264050	284141	263300	262000	251030	263250	263180	263280	267020	261140	282110	263340
		2015	272020	261140	263310	264030	252010	290390	266100	300260	268060	264270	283020	263170	283110	282050	266100	273010	290360	233020	266030	300260
		2016	290260	300120	261170	290380	282110	300130	233020	268060	264030	290360	273010	233020	261170	290360	273010	266030
		2017	272020	264020	261230	290240	282090	261170	264050	233020	273010	261140	300130	267020	263200	284096	282080	300010	264100	262000	233020	260010
		2018	267020	282050	268060	266030	260010	290200	290240	290390	284096	233005	262000	263250	300130	261140	261170	233020	263200	282090	267020	283120	273030	251002
		2019	284096	282060	283110	263090	290250	233020	290240	282110	300260	233020	263310	300130	261080
		2020	263250	263310	233020	264230	282060	282050	261080	263340	282060	300130	266030	233020	273070	282050

## Sheet: Sheet3
		1967	357060	345060	357040	345040
		1968	344070	345033	345040	357010	353060	353010	353010
		1969	344070	345020	354020	355100	345040	345020	344040
		1970	345020	345040
		1971	357110	357120	383010	360150	358057	344020	344070
		1972	358020	352010	360160	358060	357070	357080	355100	355090	334070	353010	345040
		1973	344120	353010	352010	353020	357070	351080
		1974	345040	360160	355100	351080	345060
		1975	344040
		1976	344040	344020	360060	345040	344020	352010
		1977	345040	360160	344020	345040	344120	353010	351060	345060	357120	360160
		1978	345040	353010	358060	344120
		1979	353050	357110	345040	357140	360150	358060	353060
		1980	345040	357091	345040	357120	357010
		1981	344040	352020	353010	345040	344040
		1982	353020	344120
		1983	357120	344120	345020
		1984	351020	344120	355100	357120	357110	345020	353010
		1985	344120	355020	345020	351020	344020	354010	352020
		1986	345020	354006	355100	357010
		1987	357010	355100	344040	344020	354006	345040	345020	344100
		1988	360160	357100	353010	354006	344120
		1989	355040	344100	351080
		1990	355100	357150	354006	355107	352020	360160	357110	351080
		1991	355100	353080	357120	358057	345020	353010	345040	357040
		1992	345040	357120	357110	357090	344070	345040
		1993	355100	353040	355130	344100	352080	355160	352020	355100	351080
		1994	357090	345060	355100	357120	344040	355100	357110	351020	345040	357030
		1995	345020	357110	357090	355040	360050	344070	357120	384010	353010
		1996	344100	355100	357120	334070	345040	357120
		1997	360101	382070	344100	344020	352020	357110
		1998	382050	357040	357110	353060	344100	352020	357110	357120	345020
		1999	344120	344100	352080	344070	344040	344020
		2000	355100	357090	354006	351080
		2001	360160	352020	355100	344020	344100	344040
		2002	352010	355100	344040	357110	352020	351080	344020	352020
		2003	355100	344100	357070	354006	344020	357120	352020	357110
		2004	344020	352010	344040	357120	351080	344100	344040	360050
		2005	351080	344020	353050	344120	353010	355100	360050	344100
		2006	344040	345040	344120	344040	344100	355100	354020	345040
		2007	344120	344020	344040	351080	344040	357110	352010	351050	344120
		2008	344020	351050	357120	351080	344120	352010	344040	344020	353060	358041	344100	352020	345040	351050	357110
		2009	344120	357120	345040	344020	353010	352020	357120	357091	357070	345040
		2010	352080	357040	351080	345070	354020	344020	345070	352080
		2011	352080	358057	383020	345020	344020	352090	357150	352080	351080	344040	357040	345070
		2012	344020	357090	357120	345020	344020	351080	344100	351020	345020	345070	357091
		2013	344040	354020	357120	344020	345070	344100	355100	352090
		2014	357120	384010	351020	345070	345020	354006	344020	357090	344020
		2015	344090	355100	344100	344040	357090	352050	360160	354006	345020	353020	344040	358020	345070	344020	352090
		2016	354006	354020	345040	344020	352090	357070
		2017	353010	344020	352090	357090	345020	345040	360160	344020
		2018	357040	352090	345020	353050	344040	353010	344020	352090
		2019	357090	354020	352090	344020	345040
		2020	344020	360150	344040	345070	357090	345020	353010

## Sheet: Sheet4
																																			282060
																																			260010
																																			284110
																																			300260
																																			233020				282110
																																			282030				300250
																																			234010				252010
		263250						266030																											261140				264160
		290380	261160					290070																											300250				285050										263340
		252010	284010					282110																											300060		233020		282060										282110
		263280	264010					261230									284133				284130													282030	285030	273030	251020		267020	300260					263300			268040	261140
		300240	273070		264010			283110									290030				266100					300100					300130			300260	266100	284040	290360	283110	284200	272020			284040		284130			251030	267020
		284140	261170		300240			252010									284120				300250					290380					300125			262000	266030	264090	266100	282060	263340	290380	284040		282110	261230	251030		264230	284305	263280
		261140	284130		284010			264010									261140				300270					272020					284131			300250	262000	284096	284110	272020	233020	264160	273030		267020	263200	282090		251030	290070	263180
		290061	290070		284070			284096							251030		300260	283110			284130					264071					284080			261030	251020	233020	300260	284110	268030	233020	234010		261170	283110	284040		284120	260010	263250
		263180	251050		266030			264220							284120		290390	283090			290390		285070			260010	272020				282100		233020	264010	233020	261140	282060	273030	267040	284080	263250		268030	290380	284170		261140	263090	251030
		282110	273030	284120	290120	263250		251050	284120		251050			251030	262000		263140	263310		234010	264220		282030			273083	234010				285020		283090	267020	284040	284141	252010	290360	273030	290360	284200	264260	264160	262000	300250		264270	273030	262000
		284010	265060	284010	282110	264180		233020	251030		284120			300250	267020		284210	264220	263140	264150	272020		282060	283120		300260	263250	234010	268060		261120		261030	261170	300060	234011	263340	284200	284120	261160	273010	300260	284040	261170	284193		267020	261170	263300
		284130	264140	264110	300130	252010		263340	261230		284131		274020	282090	261140	284133	284096	284070	300250	272020	300260	261140	284121	290240		264220	300260	284170	284080		267010	300270	282060	264180	263340	261170	263350	251020	263310	284040	285070	290360	268060	284040	300070	282090	252010	282060	284141
		300260	300240	290380	252010	264010	250030	290070	284010	261140	283120		263340	263200	300250	300260	283110	267020	284100	300130	284100	272020	268060	284080		264180	284131	263200	263350		284170	284110	284110	300270	273030	268030	251070	264180	261170	282110	300250	261160	260010	284170	284120	266100	290070	263300	264050
		264040	300260	264100	300260	300250	267020	290390	283220	263340	264250		284131	290260	290270	233020	284110	273010	300260	266030	284096	268040	262000	290380		283040	300250	273030	262000	283070	268060	262000	300270	261140	263180	233020	284090	233020	234070	266030	272020	283040	263250	263180	290270	267020	266030	290260	300120
		263090	266030	284142	272020	284070	264010	290030	251020	262000	300250	233020	267020	284133	263310	285040	267020	261140	300270	300270	261030	283090	284170	282110	300270	266100	267040	273083	282110	263310	262000	263340	300250	263180	300250	251020	284080	234010	264160	252010	264260	300250	266030	251030	290380	300260	300260	263340	267020
		273070	282020	274020	284010	284010	263310	261140	264010	284210	264010	300250	273030	233020	300070	268040	263340	284096	282110	300250	261120	263340	273010	300270	263340	266030	284170	263340	264030	263340	300250	300250	264010	264250	284130	262000	267010	264200	290260	260010	267020	251070	263340	264050	267020	284170	234010	284090	233020
		263300	284010	263180	284210	266100	300040	290120	300260	300240	282050	282110	285040	267020	284096	273010	284070	284110	285070	233020	261160	284210	284070	283090	233020	268060	282110	232050	300250	284080	272020	283260	261170	282030	300260	300250	273030	284211	261140	290120	273030	266030	300250	264030	251020	263300	266100	290200	251020
		290360	284130	262000	290070	266030	290160	290360	263180	284091	263340	263340	272020	282110	272020	262000	266030	282110	264150	285050	263200	284130	266100	266030	264180	267020	234010	268060	263340	263340	261170	264050	267020	273030	261220	284120	264180	282110	283110	284130	233020	268040	290360	290240	261080	282110	268060	300260	282050
		261160	284110	261170	264270	261170	233020	263180	282050	284096	284130	300260	262000	261030	300250	290390	283110	266010	263310	264050	290240	284110	265090	290070	300250	261030	272020	264220	284080	263310	283170	282060	300260	263350	263350	261160	251020	263200	300260	234011	252010	263340	283110	300260	260010	266100	261140	264250	273030
		300240	267040	263090	264180	264110	262000	266100	263340	284080	284133	285030	290030	284132	300270	284170	300260	283120	266030	300260	263250	284170	282110	283010	263280	284130	273083	263350	284130	264030	267020	283260	284130	233020	285020	300100	263100	300250	264030	263340	284040	290360	273030	290120	290240	266030	290390	261080	282110
		261170	267030	300260	261120	300260	290390	284133	290030	284131	284080	273070	273010	284070	268060	290030	283120	268060	266100	263340	290260	284130	272020	267020	282030	233020	284080	272020	264010	300250	300260	290390	285020	263340	282060	284110	233020	268060	266030	273030	261160	268060	282090	273030	233020	252010	264150	263090	283040
		300130	261160	252010	261140	290380	282050	300240	284080	284090	273070	284133	284133	262000	234070	300250	264220	264250	300070	284142	284070	264220	263180	284110	268060	263340	233020	284080	284120	282120	285070	300260	284080	300270	284110	284130	300260	266100	282030	284130	261230	261170	233020	252010	262000	262000	263340	260010	264180
		282020	284133	272020	300240	282090	284130	264150	283090	282110	267020	284080	300250	300250	282110	282110	290150	263090	273030	282030	284010	290380	268070	284080	283110	263290	300260	264250	300260	284202	290390	283090	284110	284110	284080	284121	272020	273030	251020	233020	273010	263280	300260	263200	263250	261140	284170	300120	290260
		267020	264180	273070	283230	263340	263250	282050	251070	233020	290240	233020	284096	283040	282050	263200	284120	284040	282030	272020	290360	284070	284170	300250	284010	264220	262000	300250	261230	267020	234011	284130	261170	284130	263310	284080	284130	251020	234011	300250	251070	262000	285070	233020	273010	300260	290150	252010	263340
		263280	261140	266100	273070	263210	251070	264250	284130	266100	233020	266110	284120	284141	264150	290390	284133	233020	261140	263090	300260	284010	300270	284142	282100	284080	284130	284120	273010	284130	282030	284080	285070	284120	282030	300130	266100	284110	252010	266020	284170	284200	267020	282090	300230	268060	300240	263250	290290
		284120	282050	284120	267020	300260	264150	284130	251030	284134	284131	283180	285040	273010	284070	300260	261140	263310	284100	284096	300250	264071	285050	272020	261170	282090	234011	251050	260010	234000	263200	300250	268030	290100	261030	300250	300250	284080	284040	266030	266030	261160	300090	300250	263310	261170	252010	284096	268060
		1967	1968	1969	1970	1971	1972	1973	1974	1975	1976	1977	1978	1979	1980	1981	1982	1983	1984	1985	1986	1987	1988	1989	1990	1991	1992	1993	1994	1995	1996	1997	1998	1999	2000	2001	2002	2003	2004	2005	2006	2007	2008	2009	2010	2011	2012	2013	2014
[truncated: 6 more columns]

## Sheet: Sheet5
																																											357110
																																											351050
																																											345040
																																											352020			345070
							345040																																				344100			357040	357091
							353010					360160																	357030														358041	345040		344040	345070
							334070					357120																351080	345040	353010			345020									344120	353060	357070		351080	345020		344020
							355090					345060										344100			351080	357040		355100	351020	384010			357120				352020	357110	360050	344100	345040	351050	344020	357091	352080	352080	351020	352090	357090
			353010	344040		344070	355100					351060		353060					353010	352020		345020			357110	345040		352020	357110	357120			357110				344020	352020	344040	360050	354020	352010	344040	357120	345070	357150	344100	355100	344020
			353010	345020		344020	357080	351080			352010	353010		358060					345020	354010		345040			360160	353010	345040	355160	355100	344070	357120	357110	352020	344020		344040	351080	357120	344100	355100	355100	357110	352010	352020	344020	352090	351080	344100	354006
			353060	345040		358057	357070	357070	345060		344020	344120		360150	357010	344040			357110	344020		354006	344120		352020	345020	344070	352080	344040	360050	345040	352020	344100	344040		344100	352020	344020	351080	353010	344100	344040	344120	353010	354020	344020	344020	345070	345020
		345040	357010	355100		360150	358060	353020	351080		345040	345040	344120	357140	357120	345040			357120	351020	357010	344020	354006		355107	358057	357090	344100	357120	355040	334070	344020	353060	344070	351080	344020	357110	354006	357120	344120	344040	351080	351080	344020	345070	345020	345020	344020	345070
		357040	345040	354020		383010	360160	352010	355100		360060	344020	358060	345040	345040	353010		345020	355100	345020	355100	344040	353010	351080	354006	357120	357110	355130	355100	357090	357120	344100	357110	352080	354006	355100	344040	357070	344040	353050	344120	344040	357120	345040	351080	383020	357120	357120	351020
		345060	345033	345020	345040	357120	352010	353010	360160		344020	360160	353010	357110	357091	352020	344120	344120	344120	355020	354006	355100	357100	344100	357150	353080	357120	353040	345060	357110	355100	382070	357040	344100	357090	352020	355100	344100	352010	344020	345040	344020	351050	357120	357040	358057	357090	354020	384010
		357060	344070	344070	345020	357110	358020	344120	345040	344040	344040	345040	345040	353050	345040	344040	353020	357120	351020	344120	345020	357010	360160	355040	355100	355100	345040	355100	357090	345020	344100	360101	382050	344120	355100	360160	352010	355100	344020	351080	344040	344120	344020	344120	352080	352080	344020	344040	357120
		1967	1968	1969	1970	1971	1972	1973	1974	1975	1976	1977	1978	1979	1980	1981	1982	1983	1984	1985	1986	1987	1988	1989	1990	1991	1992	1993	1994	1995	1996	1997	1998	1999	2000	2001	2002	2003	2004	2005	2006	2007	2008	2009	2010	2011	2012	2013	2014
[truncated: 6 more columns]
