# Supplementary material for: Clear anti-phase tendency of volcanic eruptions and consistent U.S. Dollar Index response to volcanic forcing
Source: Research Square preprint supplement (doi:10.21203/rs.3.rs-602091/v1), 2021-07-12
Supplement: Supplementary file 22 [file savMXNdata70.xlsx]

## Sheet: Sheet1
				-0.00060797					-6.26509e-05					0.000463469
				0.0501282					0.0059635					-0.028686
				-1.10271					-0.154546					-0.218809
				22.4734					2.46109					114.644
		Year	Raw	Trend	Detrend	MA3	z-score	Raw	Trend	Detrend	MA3	z-score	Raw	Trend	Detrend	MA3	z-score
		1967	25	21.4202	3.57983			2	2.31245	-0.312448			119.955	114.397	5.5584
		1968	24	20.4636	3.53641	1.17209	0.615712	2	2.17535	-0.175354	-0.512412	-0.747671	122.058	114.095	7.96335	7.39146	0.687911
		1969	16	19.6	-3.59997	0.703588	0.375685	1	2.04944	-1.04944	-0.719702	-1.04723	122.394	113.742	8.65262	8.11396	0.753382
		1970	21	18.8257	2.17433	-1.18756	-0.593205	1	1.93432	-0.934316	-0.604457	-0.880686	121.065	113.339	7.72592	6.98161	0.650772
		1971	16	18.137	-2.13703	-2.16437	-1.09365	2	1.82962	0.17038	-0.166303	-0.247502	117.457	112.89	4.5663	2.9919	0.289237
		1972	11	17.5304	-6.53041	-0.889869	-0.440689	2	1.73497	0.265028	-0.0715291	-0.110542	109.082	112.398	-3.31653	-3.95824	-0.340562
		1973	23	17.0022	5.99784	-1.3604	-0.681757	1	1.65	-0.649995	0.68024	0.975852	98.7408	111.865	-13.1245	-8.93463	-0.791506
		1974	13	16.5486	-3.54863	-0.23899	-0.107225	4	1.57431	2.42569	0.0893795	0.121989	100.932	111.295	-10.3629	-11.802	-1.05134
		1975	13	16.1662	-3.16618	-2.52199	-1.27687	0	1.50755	-1.50755	0.4896	0.700354	98.77	110.689	-11.9187	-8.89065	-0.787521
		1976	15	15.8511	-0.851147	-3.20574	-1.62718	2	1.44933	0.550665	1.21461	1.74808	105.66	110.05	-4.39041	-7.56222	-0.667143
		1977	10	15.5999	-5.5999	-2.28661	-1.15628	6	1.39929	4.60071	1.59812	2.30229	103.005	109.383	-6.37761	-9.28396	-0.823161
		1978	15	15.4088	-0.408775	-2.09427	-1.05774	1	1.35703	-0.357028	1.6405	2.36354	91.6042	108.688	-17.0838	-14.4925	-1.29514
		1979	15	15.2741	-0.274137	0.374918	0.207298	2	1.32219	0.677814	0.342134	0.487249	87.9533	107.969	-20.0161	-18.8504	-1.69004
		1980	17	15.1923	1.80767	0.124604	0.079055	2	1.29438	0.705615	0.37006	0.527606	87.7783	107.23	-19.4513	-14.0379	-1.25395
		1981	14	15.1597	-1.15972	2.8251	1.4626	1	1.27325	-0.273248	-0.275344	-0.405079	103.825	106.471	-2.64636	-3.61642	-0.309587
		1982	23	15.1726	7.82736	3.14673	1.62738	0	1.2584	-1.2584	-0.927037	-1.34685	116.946	105.697	11.2484	9.93213	0.918138
		1983	18	15.2275	2.77255	3.7598	1.94147	0	1.24946	-1.24946	-0.917976	-1.33376	126.105	104.911	21.1943	22.521	2.05891
		1984	16	15.3205	0.67949	1.00129	0.528207	1	1.24606	-0.246064	-0.581118	-0.846958	139.234	104.114	35.1204	31.3265	2.85682
		1985	15	15.4482	-0.448163	2.54152	1.31731	1	1.24783	-0.247826	-0.582754	-0.849322	140.974	103.31	37.6646	27.3275	2.49445
		1986	23	15.6068	7.39324	2.0508	1.0659	0	1.25437	-1.25437	-0.589175	-0.858601	111.698	102.501	9.19752	13.8309	1.27143
		1987	15	15.7927	-0.792665	2.86612	1.48361	1	1.26533	-0.265327	-0.600004	-0.874251	96.3208	101.69	-5.36948	-1.36121	-0.105227
		1988	18	16.0022	1.99778	0.324447	0.18144	1	1.28031	-0.280315	-0.281534	-0.414024	92.9692	100.881	-7.91167	-5.01155	-0.436009
		1989	16	16.2318	-0.231775	-1.23723	-0.618651	1	1.29896	-0.29896	0.0332798	0.0409187	98.3217	100.075	-1.7535	-6.59598	-0.579585
		1990	11	16.4777	-5.47769	-0.481925	-0.231688	2	1.32089	0.679114	0.0114788	0.00941368	89.1533	99.2761	-10.1228	-6.67171	-0.586448
		1991	21	16.7363	4.26369	-1.406	-0.705118	1	1.34572	-0.345718	0.320106	0.455416	90.3475	98.4864	-8.13887	-9.50654	-0.84333
		1992	14	17.004	-3.004	-0.672466	-0.329307	2	1.37308	0.626921	-0.0404631	-0.0656484	87.4508	97.7088	-10.258	-7.09656	-0.624946
		1993	14	17.2771	-3.27709	-2.61101	-1.32248	1	1.40259	-0.402593	0.596814	0.855292	94.0533	96.9462	-2.89284	-6.16347	-0.540392
		1994	16	17.552	-1.55195	-3.55133	-1.80423	3	1.43388	1.56612	0.565648	0.810253	90.8617	96.2012	-5.33958	-6.56947	-0.577183
		1995	12	17.8249	-5.82493	-1.48976	-0.748029	2	1.46658	0.533421	0.53308	0.763188	84.0008	95.4768	-11.476	-8.12874	-0.718478
		1996	21	18.0924	2.90762	-2.08932	-1.0552	1	1.5003	-0.500298	0.166152	0.232935	87.205	94.7756	-7.57065	-5.5585	-0.485572
		1997	15	18.3507	-3.35065	-0.679711	-0.333019	2	1.53467	0.465333	-0.201425	-0.298257	96.4717	94.1005	2.37113	-0.00126131	0.0180069
		1998	17	18.5961	-1.5961	-0.590606	-0.287368	1	1.56931	-0.56931	-0.569276	-0.829845	98.65	93.4543	5.19574	4.92131	0.464074
		1999	22	18.8251	3.17493	3.84831	1.98682	0	1.60385	-1.60385	-0.937025	-1.36129	100.037	92.8396	7.19707	9.94588	0.919385
		2000	29	19.0339	9.96608	4.30734	2.22199	1	1.63791	-0.637915	-0.970963	-1.41033	109.704	92.2593	17.4448	16.1933	1.4855
		2001	19	19.219	-0.218997	2.79014	1.44469	1	1.67112	-0.671124	-0.670714	-0.976435	115.654	91.7162	23.9379	20.346	1.86181
		2002	18	19.3767	-1.37666	-1.03297	-0.514005	1	1.7031	-0.703104	-1.0359	-1.50417	110.868	91.2131	19.6552	16.0649	1.47387
		2003	18	19.5033	-1.50326	0.174981	0.104864	0	1.73348	-1.73348	-0.732818	-1.06618	95.3542	90.7527	4.60146	7.02546	0.654745
		2004	23	19.5951	3.40486	0.417645	0.229189	2	1.76187	0.238129	-0.427752	-0.625326	87.1575	90.3378	-3.18032	-0.352258	-0.0137993
		2005	19	19.6487	-0.648665	0.0320044	0.0316133	2	1.78791	0.212094	0.213005	0.300642	87.4933	89.9712	-2.47791	-3.13549	-0.266007
		2006	17	19.6602	-2.66018	-2.31163	-1.1691	2	1.81121	0.188792	0.189828	0.267149	85.9075	89.6557	-3.74824	-5.09036	-0.443151
		2007	16	19.626	-3.62604	-1.6096	-0.809431	2	1.8314	0.168599	0.836427	1.20156	80.3492	89.3941	-9.04494	-8.29743	-0.733765
		2008	21	19.5426	1.45741	-1.19161	-0.59528	4	1.84811	2.15189	0.819845	1.1776	77.09	89.1891	-12.0991	-9.8178	-0.871536
		2009	18	19.4062	-1.4062	0.279337	0.158329	2	1.86096	0.139044	1.14046	1.64092	80.7342	89.0435	-8.30936	-9.29398	-0.824069
		2010	20	19.2132	0.786801	-1.85978	-0.937604	3	1.86957	1.13043	0.798639	1.14695	81.4867	88.9602	-7.47349	-9.44626	-0.837868
		2011	14	18.96	-4.95995	-1.93866	-0.978013	3	1.87356	1.12644	1.1281	1.62306	76.3858	88.9418	-12.5559	-9.53074	-0.845524
		2012	17	18.6428	-1.64281	-1.28697	-0.644133	3	1.87257	1.12743	0.462551	0.661266	80.4283	88.9911	-8.56281	-9.59299	-0.851164
		2013	21	18.2581	2.74187	1.7656	0.919786	1	1.86621	-0.866214	0.469033	0.670633	81.4508	89.1111	-7.66023	-7.49939	-0.661449
		2014	22	17.8023	4.19775	2.55603	1.32474	3	1.85412	1.14588	0.147922	0.20659	83.0292	89.3043	-6.27514	-2.25718	-0.186417
		2015	18	17.2715	0.72846	0.754622	0.401832	2	1.8359	0.164096	0.16626	0.233091	96.7375	89.5737	7.16383	2.71726	0.264351
		2016	14	16.6623	-2.66234	0.0317055	0.0314602	1	1.8112	-0.811198	-0.142242	-0.212731	97.185	89.9219	7.26309	6.65409	0.621093
		2017	18	15.971	2.029	1.39092	0.727827	2	1.77962	0.220376	-0.777209	-1.13033	95.8872	90.3518	5.53535	5.17692	0.487237
		2018	20	15.1939	4.80611	1.16926	0.614261	0	1.74081	-1.74081	-0.738266	-1.07405	93.5985	90.8662	2.73232	4.66324	0.440689
		2019	11	14.3273	-3.32734	0.0370211	0.0341835	1	1.69437	-0.694367	-0.691702	-1.00677	97.1898	91.4678	5.72206	3.88381	0.370059
		2020	12	13.3677	-1.36771			2	1.63993	0.360067			95.3564	92.1594	3.19704

## Sheet: Sheet2
		1967	284120	263280	267020	282020	300130	261170	300240	261160	290360	263300	273070	263090	264040	300260	284130	284010	282110	263180	290061	261140	284140	300240	263280	290380	263250
		1968	282050	261140	264180	284133	261160	267030	267040	284110	284130	284010	282020	266030	300260	300240	264140	265060	273030	290070	284130	261170	273070	264010	284010	261160
		1969	284120	266100	273070	272020	300260	263090	261170	262000	263180	274020	284142	264100	290380	264110	284010	284120
		1970	267020	273070	283230	300240	261140	261120	264180	264270	290070	284210	284010	272020	300260	300130	282110	290120	266030	284070	284010	300240	264010
		1971	300260	263210	263340	282090	290380	300260	264110	261170	266030	266100	284010	284070	300250	264010	264180	263250
		1972	264150	263250	284130	282050	290390	262000	290160	300040	263310	264010	267020
		1973	284130	264250	282050	264150	300240	284133	266100	263180	290360	290120	261140	290030	290390	290070	263340	264220	284096	264010	283110	261230	282110	290070	266030
		1974	284130	283090	284080	290030	263340	282050	263180	300260	264010	283220	284010	261230	284120
		1975	284134	266100	282110	284090	284131	284080	284096	284091	300240	284210	262000	263340	261140
		1976	284131	290240	267020	273070	284080	284133	284130	263340	282050	264010	300250	264250	283120	284131	284120
		1977	283180	266110	284080	284133	273070	285030	300260	263340	282110	300250
		1978	285040	284120	284096	300250	284133	273010	290030	262000	272020	285040	273030	267020	284131	263340	274020
		1979	273010	284141	283040	300250	262000	284070	284132	261030	282110	267020	284133	290260	263200	282090	300250
		1980	284070	264150	282050	282110	268060	300270	300250	272020	284096	300070	263310	290270	300250	261140	267020	262000	284120
		1981	300260	290390	263200	282110	300250	290030	284170	290390	262000	273010	268040	285040	300260	284133
		1982	261140	284133	284120	290150	264220	283120	300260	283110	266030	284070	263340	267020	284110	283110	284096	284210	263140	290390	300260	261140	284120	290030	284133
		1983	263310	284040	263090	264250	268060	283120	266010	282110	284110	284096	261140	273010	267020	284070	264220	263310	283090	283110
		1984	284100	261140	282030	273030	300070	266100	266030	263310	264150	285070	282110	300270	300260	284100	300250	263140
		1985	284096	263090	272020	282030	284142	263340	300260	264050	285050	300250	300270	266030	300130	272020	264150
		1986	300250	300260	290360	284010	284070	290260	263250	290240	263200	261160	261120	261030	284096	284100	300260	272020	264220	290390	284130	300270	300250	266100	284130
		1987	264071	284010	284070	290380	264220	284130	284170	284110	284130	284210	263340	283090	268040	272020	261140
		1988	285050	300270	284170	268070	263180	272020	282110	265090	266100	284070	273010	284170	262000	268060	284121	282060	282030	285070
		1989	272020	284142	300250	284080	284110	267020	283010	290070	266030	283090	300270	282110	290380	284080	290240	283120
		1990	261170	282100	284010	283110	268060	282030	263280	300250	264180	263340	300270
		1991	282090	284080	264220	263290	263340	284130	261030	267020	268060	266030	266100	283040	264180	264220	300260	273083	260010	264071	272020	290380	300100
		1992	284130	262000	300260	284080	273083	272020	282110	284170	267040	300250	284131	300260	263250	272020
		1993	284120	300250	264250	284080	272020	263350	264220	268060	232050	263340	273083	273030	263200	284170
		1994	260010	273010	261230	300260	284120	264010	284130	284080	263340	300250	264030	282110	262000	263350	284080	268060
		1995	284130	267020	284202	282120	300250	264030	263310	263340	284080	263340	263310	283070
		1996	263200	282030	290390	285070	300260	267020	283170	261170	272020	300250	262000	268060	284170	267010	261120	285020	282100	284080	284131	300125	300130
		1997	300250	284080	284130	283090	300260	290390	283260	282060	264050	283260	300250	263340	262000	284110	300270
		1998	268030	285070	261170	284110	284080	285020	284130	300260	267020	261170	264010	300250	300270	284110	282060	261030	283090
		1999	290100	284120	284130	284110	300270	263340	263350	273030	282030	264250	263180	261140	300270	264180	261170	267020	264010	261030	300250	262000	300260	282030
		2000	261030	282030	263310	284080	284110	282060	285020	263350	261220	300260	284130	300250	263180	273030	263340	300060	284040	262000	266030	266100	285030	300060	300250	261140	282030	300260	284110	260010	282060
		2001	300250	300130	284080	284121	284130	284110	300100	261160	284120	300250	262000	268030	261170	284141	261140	284096	264090	284040	273030
		2002	300250	266100	284130	272020	300260	263100	264180	273030	267010	284080	284090	263350	263340	282060	300260	284110	266100	290360
		2003	284080	284110	273030	266100	268060	300250	263200	282110	284211	264200	264180	284200	290360	273030	284110	272020	282060	283110
		2004	284040	282030	266030	264030	300260	283110	261140	290260	264160	261170	263310	284120	273030	267040	268030	263340	284200	267020	282060	285050	264160	300250	282110
		2005	266030	266020	300250	284130	273030	263340	284130	290120	260010	266030	282110	284040	261160	290360	284080	264160	290380	272020	300260
		2006	266030	284170	273010	261230	261160	284040	273030	267020	264260	272020	300250	285070	273010	284200	263250	273030	284040
		2007	261160	284200	262000	263280	261170	268060	290360	263340	268040	266030	300250	283040	261160	290360	300260	264260
		2008	300090	267020	285070	300260	282090	273030	283110	290360	300250	263340	266030	263250	260010	268060	284040	264160	268030	261170	267020	282110	284040
		2009	300250	282090	263200	273030	290120	300260	290240	264030	264050	263180	284170	284040	261170	262000	290380	283110	263200	261230
		2010	263310	300230	273010	263250	262000	290240	260010	261080	267020	290380	290270	284120	300070	284193	300250	284170	284040	282090	284130	263300
		2011	261170	268060	300260	261140	262000	266030	266100	282110	263300	284170	300260	267020	266100	282090
		2012	300240	290150	284170	263340	264150	290390	261140	268060	266100	300260	266030	290070	267020	264270	261140	284120	264230
		2013	284096	263250	300120	260010	263090	261080	264250	300260	290200	284090	263340	290260	263300	282060	261170	273030	263090	260010	290070	284305	268040
		2014	268060	290290	263340	290260	264180	283040	282110	273030	282050	267020	300120	264050	284141	263300	262000	263250	263180	263280	267020	261140	282110	263340
		2015	272020	261140	263310	264030	290390	266100	300260	268060	264270	283020	263170	283110	282050	266100	273010	290360	266030	300260
		2016	290260	300120	261170	290380	282110	300130	268060	264030	290360	273010	261170	290360	273010	266030
		2017	272020	264020	261230	290240	282090	261170	264050	273010	261140	300130	267020	263200	284096	282080	300010	264100	262000	260010
		2018	267020	282050	268060	266030	260010	290200	290240	290390	284096	262000	263250	300130	261140	261170	263200	282090	267020	283120	273030	251002
		2019	284096	282060	283110	263090	290250	290240	282110	300260	263310	300130	261080
		2020	263250	263310	264230	282060	282050	261080	263340	282060	300130	266030	273070	282050

## Sheet: Sheet3
		1967	345060	345040
		1968	345033	345040
		1969	345040
		1970	345040
		1971	383010	360150
		1972	360160	345040
		1973	351080
		1974	345040	360160	351080	345060
		1975
		1976	360060	345040
		1977	345040	360160	345040	351060	345060	360160
		1978	345040
		1979	345040	360150
		1980	345040	345040
		1981	345040
		1982
		1983
		1984	351020
		1985	351020
		1986
		1987	345040
		1988	360160
		1989	351080
		1990	360160	351080
		1991	345040
		1992	345040	345040
		1993	351080
		1994	345060	351020	345040
		1995	360050	384010
		1996	345040
		1997	360101	382070
		1998	382050
		1999
		2000	351080
		2001	360160
		2002	351080
		2003
		2004	351080	360050
		2005	351080	360050
		2006	345040	345040
		2007	351080	351050
		2008	351050	351080	345040	351050
		2009	345040	345040
		2010	351080	345070	345070
		2011	383020	351080	345070
		2012	351080	351020	345070
		2013	345070
		2014	384010	351020	345070
		2015	360160	345070
		2016	345040
		2017	345040	360160
		2018
		2019	345040
		2020	360150	345070

## Sheet: Sheet4
																																			282060
																																			260010
																																			284110
																																			300260
		263250																																	282030
		290380	261160																																261140
		263280	284010					266030									284133				284130														300250				282110
		300240	264010					290070									290030				266100													282030	300060				300250										263340
		284140	273070		264010			282110									284120				300250					300100					300130			300260	285030				264160				284040					268040	282110
		261140	261170		300240			261230									261140				300270					290380					300125			262000	266100				285050				282110		263300			284305	261140
		290061	284130		284010			283110									300260				284130					272020					284131			300250	266030	273030			282060	300260			267020		284130			290070	267020
		263180	290070		284070			264010									290390	283110			290390		285070			264071					284080			261030	262000	284040	290360	283110	267020	272020			261170	261230	282090			260010	263280
		282110	273030		266030			284096							284120		263140	283090			264220		282030			260010					282100		283090	264010	284040	264090	266100	282060	284200	290380	284040		268030	263200	284040		264230	263090	263180
		284010	265060	284120	290120	263250		264220							262000		284210	263310	263140		272020		282060	283120		273083			268060		285020		261030	267020	300060	284096	284110	272020	263340	264160	273030	264260	264160	283110	284170		284120	273030	263250
		284130	264140	284010	282110	264180		263340			284120		274020	300250	267020		284096	264220	300250	264150	300260	261140	284121	290240		300260			284080		261120	300270	282060	261170	263340	261140	300260	284110	268030	284080	263250	300260	284040	290380	300250		261140	261170	262000
		300260	300240	264110	300130	264010		290070			284131		263340	282090	261140	284133	283110	284070	284100	272020	284100	272020	268060	284080		264220	272020	284170	263350		267010	284110	284110	264180	273030	284141	282060	273030	267040	290360	284200	290360	268060	262000	284193	282090	264270	282060	263300
		264040	300260	290380	300260	300250		290390	284120	261140	283120		284131	263200	300250	300260	284110	267020	300260	300130	284096	268040	262000	290380		264180	263250	263200	262000		284170	262000	300270	300270	263180	261170	263340	290360	273030	261160	273010	261160	260010	261170	300070	266100	267020	263300	284141
		263090	266030	264100	272020	284070		290030	261230	263340	264250		267020	290260	290270	285040	267020	273010	300270	266030	261030	283090	284170	282110		283040	300260	273030	282110	283070	268060	263340	300250	261140	300250	268030	263350	284200	284120	284040	285070	283040	263250	284040	284120	267020	290070	290260	264050
		273070	282020	284142	284010	284010	267020	261140	284010	262000	300250		273030	284133	263310	268040	263340	261140	282110	300270	261120	263340	273010	300270	300270	266100	284131	273083	264030	263310	262000	300250	264010	263180	284130	262000	284090	264180	263310	282110	300250	300250	266030	284170	290270	300260	266030	263340	300120
		263300	284010	274020	284210	266100	264010	290120	283220	284210	264010	300250	285040	267020	300070	273010	284070	284096	285070	300250	261160	284210	284070	283090	263340	266030	300250	263340	300250	263340	300250	283260	261170	264250	300260	300250	284080	264200	261170	266030	272020	266030	263340	263180	290380	284170	300260	284090	267020
		290360	284130	263180	290070	266030	263310	290360	264010	300240	282050	282110	272020	282110	284096	262000	266030	284110	264150	285050	263200	284130	266100	266030	264180	268060	267040	232050	263340	284080	272020	264050	267020	282030	261220	284120	267010	284211	264160	260010	264260	268040	300250	264050	267020	263300	266100	290200	282050
		261160	284110	262000	264270	261170	300040	263180	300260	284091	263340	263340	262000	261030	272020	290390	283110	282110	263310	264050	290240	284110	265090	290070	300250	267020	284170	268060	284080	263340	261170	282060	300260	273030	263350	261160	273030	282110	290260	290120	267020	263340	290360	264030	261080	282110	268060	300260	273030
		300240	267040	261170	264180	264110	290160	266100	263180	284096	284130	300260	290030	284132	300250	284170	300260	266010	266030	300260	263250	284170	282110	283010	263280	261030	282110	264220	284130	263310	283170	283260	284130	263350	285020	300100	264180	263200	261140	284130	273030	290360	283110	290240	260010	266100	261140	264250	282110
		261170	267030	263090	261120	300260	262000	284133	282050	284080	284133	285030	273010	284070	300270	290030	283120	283120	266100	263340	290260	284130	272020	267020	282030	284130	272020	263350	264010	264030	267020	290390	285020	263340	282060	284110	263100	300250	283110	263340	284040	268060	273030	300260	290240	266030	290390	261080	283040
		300130	261160	300260	261140	290380	290390	300240	263340	284131	284080	273070	284133	262000	268060	300250	264220	268060	300070	284142	284070	264220	263180	284110	268060	263340	273083	272020	284120	300250	300260	300260	284080	300270	284110	284130	300260	268060	300260	273030	261160	261170	282090	290120	262000	262000	264150	263090	264180
		282020	284133	272020	300240	282090	282050	264150	290030	284090	273070	284133	300250	300250	282110	282110	290150	264250	273030	282030	284010	290380	268070	284080	283110	263290	284080	284080	300260	282120	285070	283090	284110	284110	284080	284121	272020	266100	264030	284130	261230	263280	300260	273030	263250	261140	263340	260010	290260
		267020	264180	273070	283230	263340	284130	282050	284080	282110	267020	284080	284096	283040	282050	263200	284120	263090	282030	272020	290360	284070	284170	300250	284010	264220	300260	264250	261230	284202	290390	284130	261170	284130	263310	284080	284130	273030	266030	300250	273010	262000	285070	263200	273010	300260	284170	300120	263340
		263280	261140	266100	273070	263210	263250	264250	283090	266100	290240	266110	284120	284141	264150	290390	284133	284040	261140	263090	300260	284010	300270	284142	282100	284080	262000	300250	273010	267020	282030	284080	285070	284120	282030	300130	266100	284110	282030	266020	284170	284200	267020	282090	300230	268060	290150	263250	290290
		284120	282050	284120	267020	300260	264150	284130	284130	284134	284131	283180	285040	273010	284070	300260	261140	263310	284100	284096	300250	264071	285050	272020	261170	282090	284130	284120	260010	284130	263200	300250	268030	290100	261030	300250	300250	284080	284040	266030	266030	261160	300090	300250	263310	261170	300240	284096	268060
		1967	1968	1969	1970	1971	1972	1973	1974	1975	1976	1977	1978	1979	1980	1981	1982	1983	1984	1985	1986	1987	1988	1989	1990	1991	1992	1993	1994	1995	1996	1997	1998	1999	2000	2001	2002	2003	2004	2005	2006	2007	2008	2009	2010	2011	2012	2013	2014
[truncated: 6 more columns]

## Sheet: Sheet5
												360160
												345060
									345060			351060																															351050
									351080			345040																	345040														345040		345070	345070	345070		345070
		345040	345040			360150	345040		360160		345040	360160		360150	345040										351080		345040		351020	384010		382070							360050	360050	345040	351050	351080	345040	345070	351080	351020		351020
		345060	345033	345040	345040	383010	360160	351080	345040		360060	345040	345040	345040	345040	345040			351020	351020		345040	360160	351080	360160	345040	345040	351080	345060	360050	345040	360101	382050		351080	360160	351080		351080	351080	345040	351080	351050	345040	351080	383020	351080	345070	384010
		1967	1968	1969	1970	1971	1972	1973	1974	1975	1976	1977	1978	1979	1980	1981	1982	1983	1984	1985	1986	1987	1988	1989	1990	1991	1992	1993	1994	1995	1996	1997	1998	1999	2000	2001	2002	2003	2004	2005	2006	2007	2008	2009	2010	2011	2012	2013	2014
[truncated: 6 more columns]
